# Supplementary material
Source: PubMed Central journal article supplement (PMC6386683)
Supplement: pnas.1811766116.sapp.pdf [file pnas.1811766116.sapp.pdf]

Fig. S1

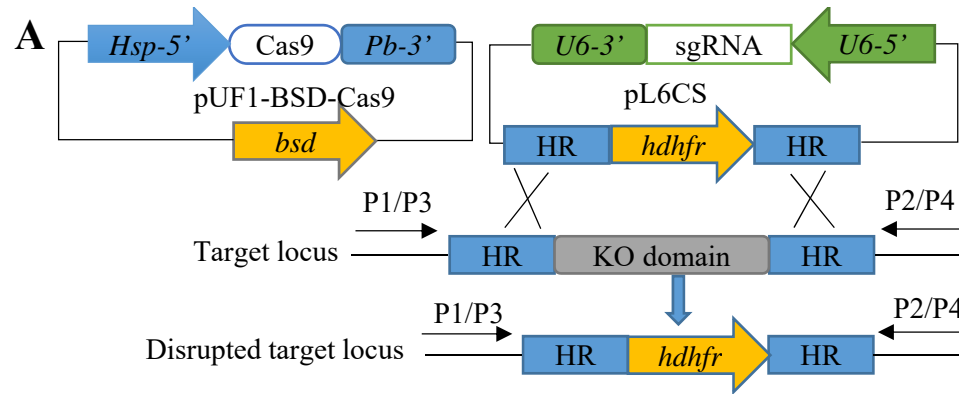

**B**

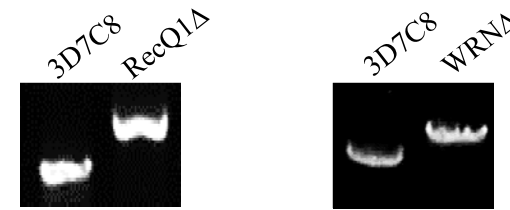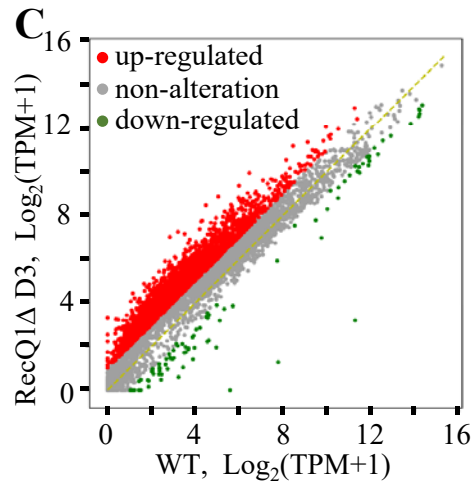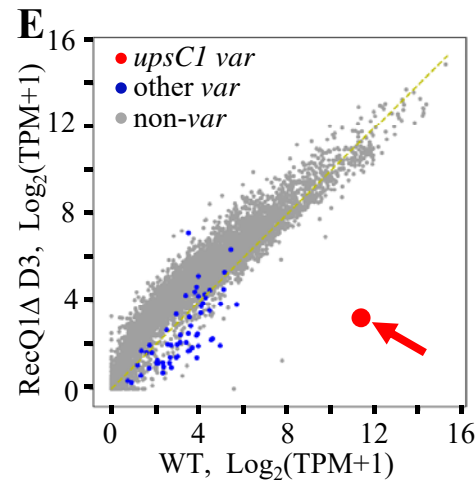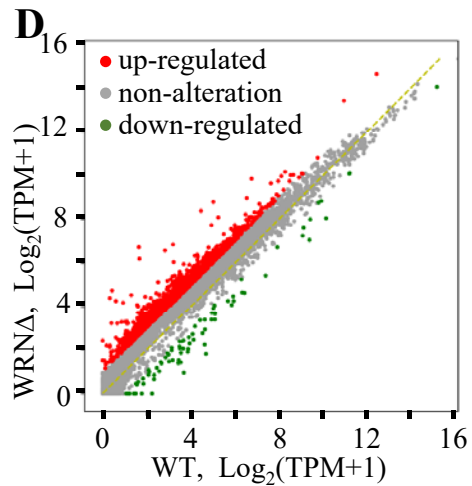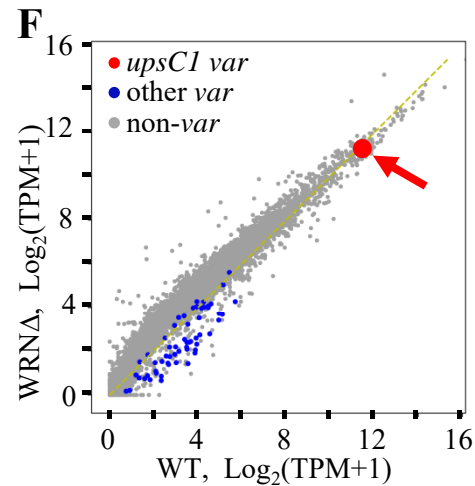

**G**

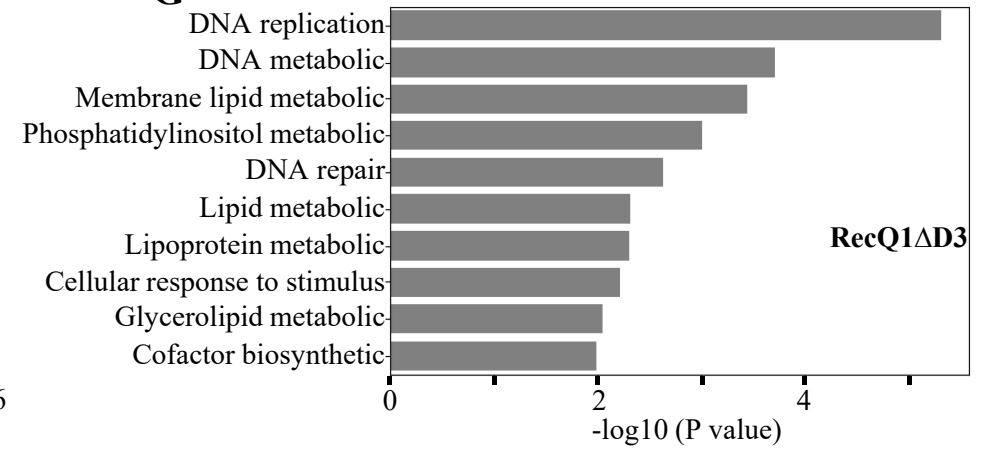

**H**

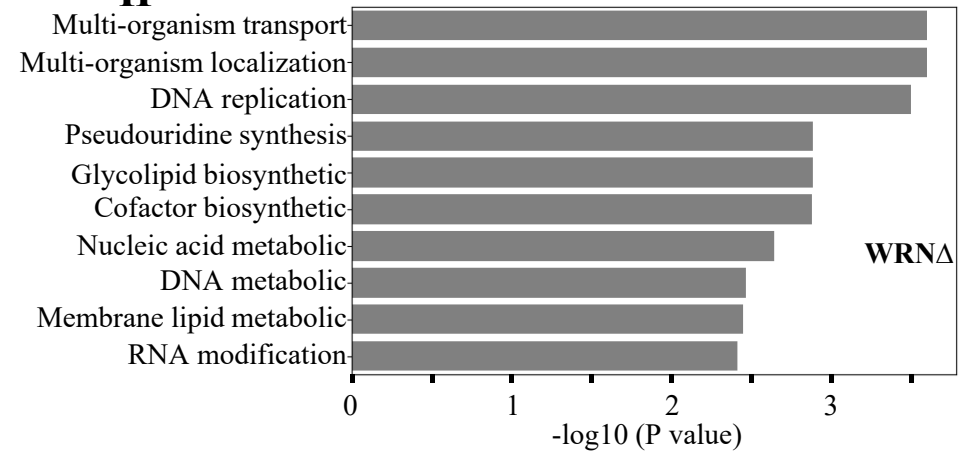

Fig. S2

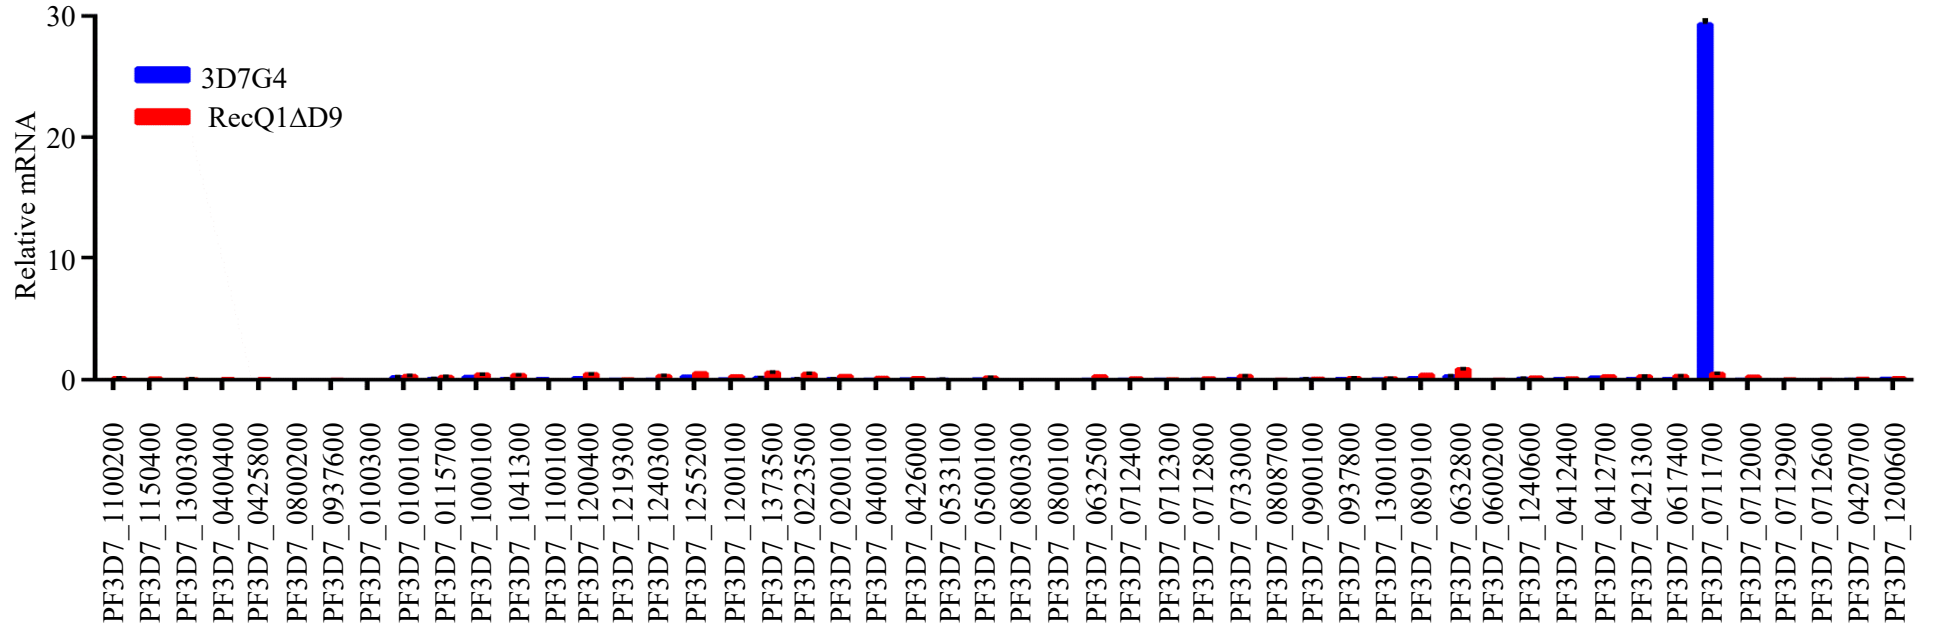

Fig. S3

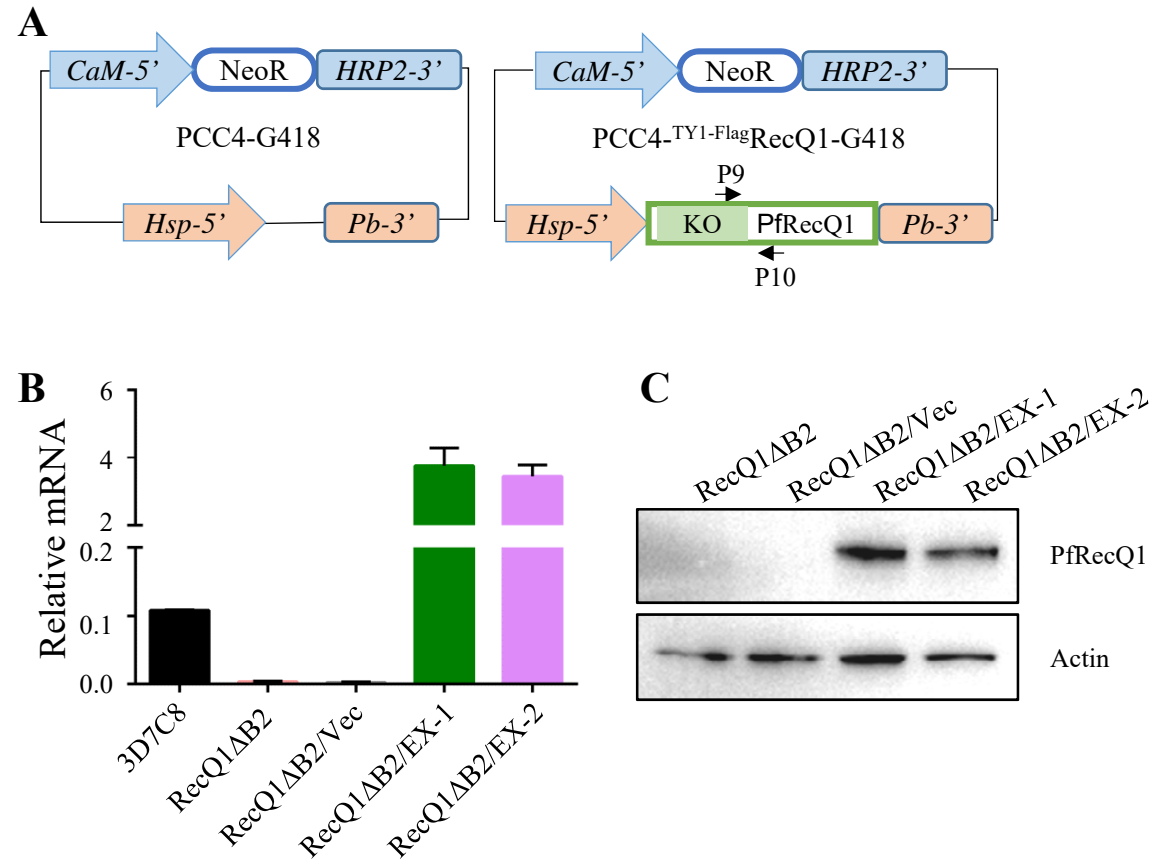

Fig. S4

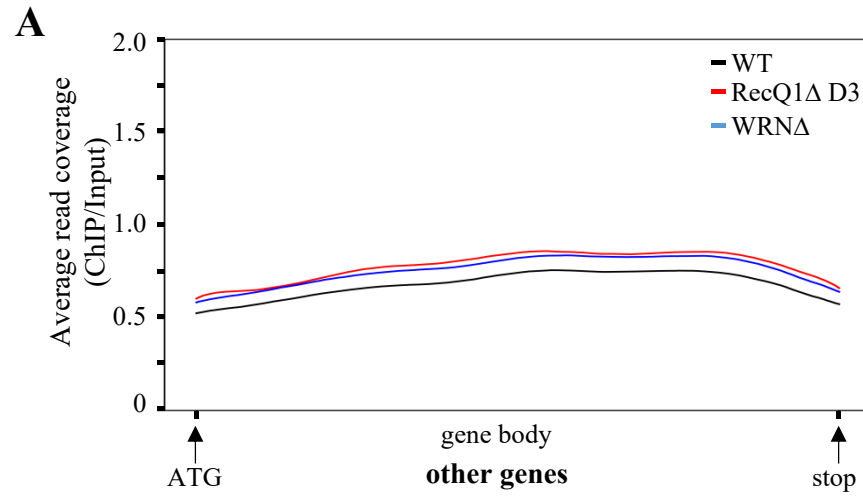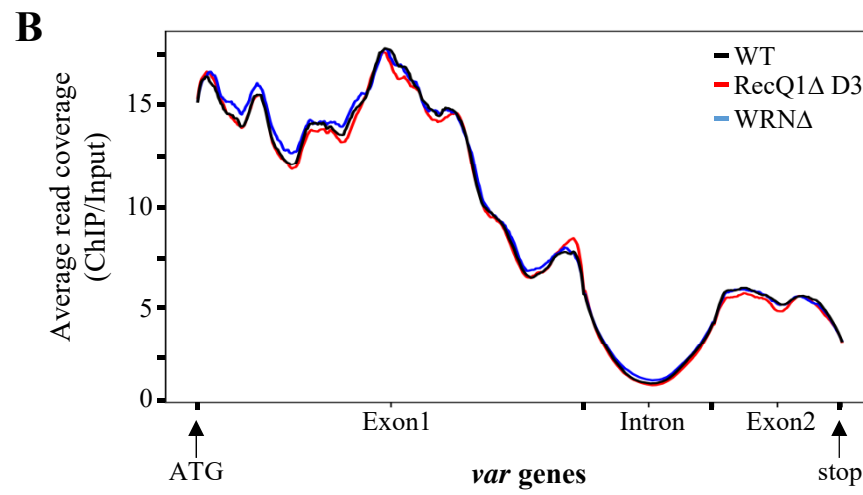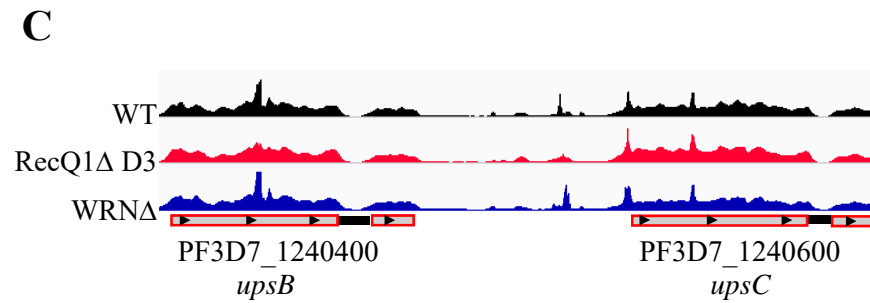

Fig. S5

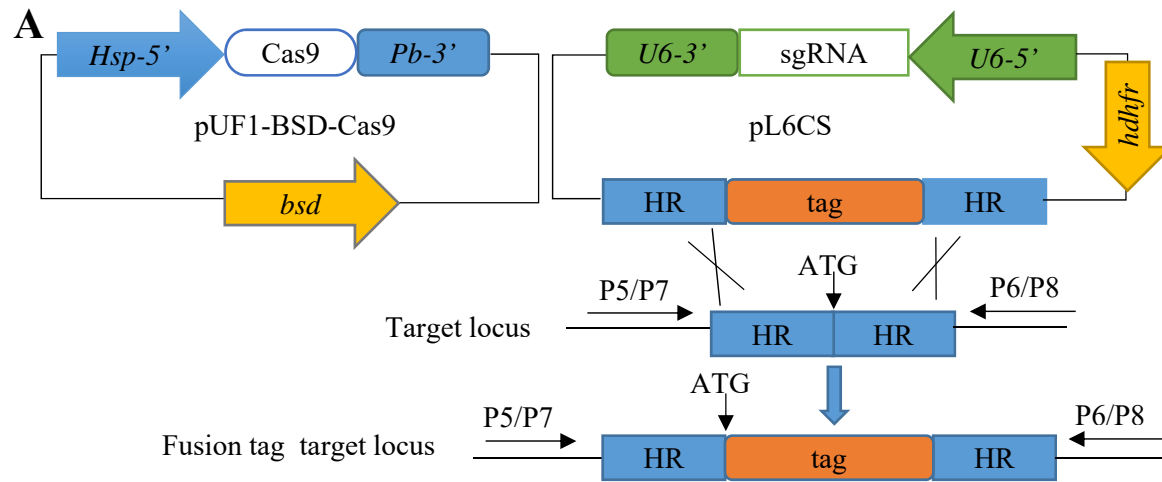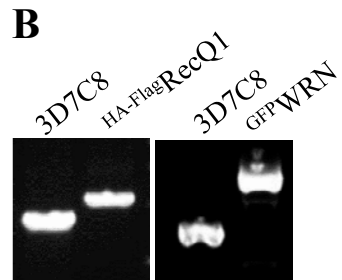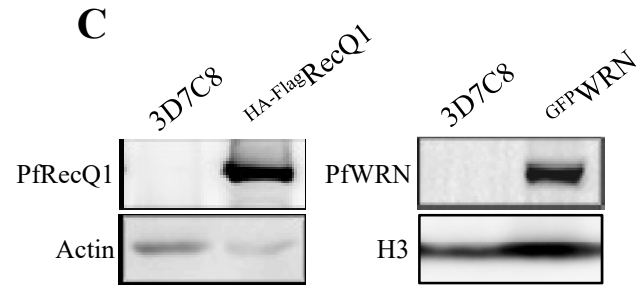

## **Supplementary Materials and Methods**

**RNA-seq and RT-qPCR.** Total RNA was extracted from parasites using Trizol (Life Technologies) according to the manufacturer's instructions. Total RNA was dissolved in RNase-free water for downstream use. The mRNA-seq library was constructed by KAPA Stranded mRNA-seq Kit (KAPA biosystems, KK8420) according to the manufacturer's instructions. Barcoded libraries were pooled and sequenced with read lengths (2 x 150 nt) on the HiSeq X Ten machine (Illumina, CA). For RT-qPCR, cDNA was synthesized using the FastQuant RT kit (Tiangen). Primer sequences for *var* genes were from a previous report (1). qPCR was performed on the ABI 7900 system with an initial denaturing at 95°C for 5 min, followed by 40 cycles of 10 s at 95°C, 20 s at 50°C and 30 s at 60°C. The housekeeping gene *arginyl-tRNA synthetase* (PF3D7\_0913900) was used as internal control.

**Western blot analysis.** Parasite pellets were released from infected red blood cells (iRBC) with 0.15% saponin and then lysed in lysis buffer containing NP40. After centrifugation, the supernatant was mixed with SDS-PAGE loading buffer, separated in SDS-PAGE and transferred to PVDF membrane. Immunodetection was carried out using anti-Flag (Abmart), anti-GFP (Abcam), anti-H3 (Abcam), anti-TY1 (Genscript), anti-Actin (Abclonal) followed by secondary antibodies conjugated to HRP (Jackson Immuno Research Laboratories). Chemiluminescent HRP substrate Immobilon Western kit (Millipore) was used to develop blots.

**DNA fluorescence in situ hybridization (DNA-FISH).** DNA-FISH was carried out as previously reported (2). Briefly, parasites were synchronized at the ring stage, released from iRBC with 0.15% saponin and fixed with 4% paraformaldehyde, deposited on slides, and then permeabilized with 0.25% Triton X-100. *P. falciparum* DNA on the slides was then denatured, hybridized with probes at 37°C for 22 hr and washed with a series of buffers. Probes used for this study were amplified with primers shown in *SI Appendix* Table 3, labeled with respective fluorescence by using Biotin High Prime kit and

Fluorescein High Prime kit (Roche). Slides were observed under the Olympus FV-1200 microscope.

**Chromatin immunoprecipitation (ChIP).** The ChIP assay was performed as previously described (3). Briefly, iRBCs were fixed with 1% formaldehyde solution (Thermo) at room temperature for 10 min and stopped by addition of 125 mM glycine at room temperature for another 5 min. Parasites were released by using 0.15% saponin. Chromatin was sheared to a size range between 300 bp to 600 bp by Bioruptor UCD-200 (Diagenode). Antibodies against Flag (Sigma), GFP (Abcam) and H3K9me3 (Abcam) were used in this assay. DNA from the ChIP assay was used for constructing high-throughput sequencing libraries (ChIP-seq library) followed by sequencing on the HiSeq X Ten machine. ChIP-qPCR assay used the same aliquot of immunoprecipitated DNA and detected on the ABI 7900 system. Primers for H3K9me3 ChIP-qPCR are shown in *SI Appendix* Table 3.

**Next-generation sequencing and data analysis.** Both ChIP-seq and RNA-seq raw reads were first accessed and filtered using FASTQC (v0.11.7) and trim galore (0.4.4\_dev) tools to remove the low-quality reads (quality score < 20), sequencing adaptors and the first 3 bases. For ChIP-seq analysis, clean reads were mapped to *P. falciparum* 3D7 reference genome (release 33, <http://plasmodb.org/plasmo/>) using Bowtie 2 (version 2.2.4), allowing 1 mismatch (parameters “-p 8 -N 1”) (4), and default settings for other parameters. The mapped reads with low mapping quality and putative PCR duplicates were filtered out with sam tools (v1.7) to obtain high quality and unique mapped reads (5). The sam files of mapping results were then converted into bam files. The bam files were sorted and indexed using samtools. To enable viewing the sequencing results in a genome browser, the genome-wide read coverage and enrichment were assessed using deepTools (tags were binned, smoothed, and RPKM normalized) (6). The signal profiles of all ChIP-seq assay (PfRecQ1 and PfWRN localization or H3K9me3 histone modification) were plotted using the in-house python scripts based on the metaseq

framework (7).

For RNA-seq analysis, clean reads were mapped to *P. falciparum* 3D7 reference genome (release 33, <http://plasmodb.org/plasmo/>) using HISAT2 with default parameters (8). We used featureCounts (v1.6.1) to count the number of reads mapping to the annotated genes (9). Counted reads were used to do differential expression analysis after normalized by TPM (Transcripts Per Million) method. The up-regulated genes ( $\log_2$  fold change > 1) were then used to perform GO analysis. All scatter plots were plotted using the Matplotlib Python package (v2.2.2). The GO bar plot was made by seaborn Python package (v0.8.1).

## Supplementary REFERENCES

1. Salanti A, *et al.* (2003) Selective upregulation of a single distinctly structured var gene in chondroitin sulphate A-adhering Plasmodium falciparum involved in pregnancy-associated malaria. *Molecular microbiology* 49(1):179-191.
2. Mancio-Silva L, Scherf A (2013) In situ fluorescence visualization of transcription sites and genomic Loci in blood stages of Plasmodium falciparum. *Methods Mol Biol* 923:335-351.
3. Chookajorn T, *et al.* (2007) Epigenetic memory at malaria virulence genes. *P Natl Acad Sci USA* 104(3):899-902.
4. Langmead B, Salzberg SL (2012) Fast gapped-read alignment with Bowtie 2. *Nature methods* 9(4):357-359.
5. Li H, *et al.* (2009) The Sequence Alignment/Map format and SAMtools. *Bioinformatics* 25(16):2078-2079.
6. Ramirez F, *et al.* (2016) deepTools2: a next generation web server for deep-sequencing data analysis. *Nucleic Acids Res* 44(W1):W160-165.
7. Dale RK, Matzat LH, Lei EP (2014) metaseq: a Python package for integrative genome-wide analysis reveals relationships between chromatin insulators and associated nuclear mRNA. *Nucleic Acids Res* 42(14):9158-9170.
8. Kim D, Langmead B, Salzberg SL (2015) HISAT: a fast spliced aligner with low memory requirements. *Nature methods* 12(4):357-360.
9. Liao Y, Smyth GK, Shi W (2014) featureCounts: an efficient general purpose program for assigning sequence reads to genomic features. *Bioinformatics* 30(7):923-930.

## Supplementary Figure Legends

**Fig. S1.** Transcriptomic analysis in PfRecQ1 $\Delta$  and PfWRN $\Delta$ . (A) Scheme for knocking



out PfRecQ1 and PfWRN genes using the CRISPR/Cas9 system. pUF1-BSD-Cas9 and pL6CS-hDHFR-sgRNA were co-transfected into 3D7C8 or 3D7G4 parasites. Paired primers of P1/P2 and P3/ P4 were used for these PCRs. (B) PCR assessment of the PfRecQ1 knockout and PfWRN knockout. The expected PCR products of WT and PfRecQ1 $\Delta$  were 2515bp and 3614bp respectively, using primers P1/P2. The PCR products of WT and PfWRN $\Delta$  were 3335bp and 3647bp respectively, using primers P3/P4. (C-F) Comparative transcriptional analysis of global genes from RNA-seq in (C & E) RecQ1 $\Delta$ D3 and WT 3D7C8, (D & F) WRN $\Delta$  and WT 3D7C8. (C-D) The dramatically increased transcription was labeled with red dots, the dramatically decreased transcription was labeled with green dots. (E-F) The dominantly active var gene in WT (uspC1, PF3D7\_1240600) was highlighted with red dot and arrow, other 59 var genes were labeled with blue dots. X axis 3D7C8 Log<sub>2</sub>(TPM+1) and Y axis RecQ1 $\Delta$ D3 Log<sub>2</sub>(TPM+1) or WRN $\Delta$  Log<sub>2</sub>(TPM+1) are logarithmic (TPM+1) values. TPM = transcripts per million. (G-H) The top10 GO (Gene Ontology) biological process pathway terms enriched by these genes which dramatically increased upon (G) PfRecQ1 $\Delta$  or (H) PfWRN $\Delta$ . X axis was -log<sub>10</sub> (P value).

**Fig. S2.** Silence of var gene family in PfRecQ1 $\Delta$ D9. Var genes expression level was detected by RT-qPCR. PfRecQ1 $\Delta$ D9 was clone from transfection into another WT strain, 3D7G4 (PF3D7\_0711700 dominantly expressed). Y-axis values represent relative abundance of var genes mRNA; var gene IDs are shown below X axis. Arginyl-tRNA synthetase (PF3D7\_0913900), a housekeeping gene, is used as internal control. Experiments were repeated at least twice. Error bars represent SEM.

**Fig. S3.** PfRecQ1 complementation by episomal expression. (A) Plasmid schematic of PCC4-G418 (vector, as control), and PCC4-TY1-FlagRecQ1-G418 for PfRecQ1 complementation. P9/P10 primers used for PfRecQ1 RT-qPCR and the knock-out region of PfRecQ1 (KO) were also labeled. (B) RT-qPCR of PfRecQ1 using P9/P10 primers. Y-axis values represent relative abundance of PfRecQ1 mRNA; Arginyl-tRNA synthetase

(PF3D7\_0913900) served as internal control. Error bars represent SEM. (C) Western blotting to assess the episomal expression of TY1-FlagPfRecQ1 protein. Theoretical molecular weight of TY1-FlagPfRecQ1 was 93KD. An anti-TY1 antibody was used in WB to detect TY1-FlagPfRecQ1. A specific band appeared at position with correct MW for this episomal expression of PfRecQ1. RecQ1 $\Delta$ B2/Vec is PfRecQ1 $\Delta$ B2 transfected with PCC4-G418 vector, using as the control. RecQ1 $\Delta$ B2/EX-1 and -2 are PfRecQ1 $\Delta$ B2 transfected with PCC4-TY1-FlagRecQ1-G418, using for complementation of PfRecQ1.

**Fig. S4.** H3K9me3 modification upon PfRecQ1 $\Delta$  or PfWRN $\Delta$ . (A-B) Average reads coverage profile of H3K9me3 at gene bodies of (A) other genes and (B) var genes. (C) Detailed integrative genomic view of H3K9me3's enrichment to two var genes in the boxed region of Fig. 2C. PF3D7\_1240400 is a upsB var, PF3D7\_1240600 is a upsC var. WT-3D7C8 is black curve, PfRecQ1 $\Delta$  is red, PfWRN $\Delta$  is blue. The signal values were normalized by RPKM methods followed by ChIP/Input. Signal values on the Y axis were averaged from duplicate experiments.

**Fig. S5.** Tagging of PfRecQ1 and PfWRN. (A) Tagging schemes for using CRISPR/Cas9 system. pUF1-BSD-Cas9 and pL6CS-hDHFR-sgRNA were co-transfected into parasites of 3D7C8 for HA-FlagRecQ1 or GFPWRN. Primer pairs P5/P6 and P7/P8 were respectively used for individual PCRs to check the tagging. (B) PCR to check the tagging to endogenous genes. Using P5/P6 primers, the expected PCR products for WT and HA-FlagRecQ1 are 1425bp and 1625bp respectively; the PCR of WT and GFPWRN using P7/P8 primers are 1120bp and 1872bp respectively. (C) Western blotting to assess the tagging. Theoretical molecular weight of HA-FlagRecQ1, GFPWRN was 92KD and 197KD respectively. Antibodies against Flag, GFP were used in WB to detect HA-FlagRecQ1, GFPWRN. Specific bands appeared at position with the expected MW for these two tagging.

Table 1, RecQ1 Δ RNA-seq

| GeneSymbol      | [Product Description]                                                   | log2fdc | WT_12_16h_RPKM | RecQ1Δ_12_16h_RPKM |
|-----------------|-------------------------------------------------------------------------|---------|----------------|--------------------|
| PF3D7_0100100   | erythrocyte membrane protein 1, PfEMP1 (VAR)                            | 0.65    | 6.20           | 10.95              |
| PF3D7_0100200   | rifin (RIF)                                                             | 0.16    | 2.59           | 3.27               |
| PF3D7_0100300   | erythrocyte membrane protein 1, PfEMP1 (VAR)                            | -1.81   | 3.36           | 1.08               |
| PF3D7_0100400   | rifin (RIF)                                                             | 1.10    | 3.90           | 9.48               |
| PF3D7_0100500   | erythrocyte membrane protein 1 (PfEMP1), exon 1, pseudogene             | 0.21    | 0.20           | 0.35               |
| PF3D7_0100600   | rifin (RIF)                                                             | 3.16    | 0.15           | 1.66               |
| PF3D7_0100700   | Plasmodium exported protein, unknown function, fragment                 | -0.38   | 0.00           | 0.00               |
| PF3D7_0100800   | rifin (RIF)                                                             | 1.21    | 0.04           | 0.15               |
| PF3D7_0100900   | rifin (RIF)                                                             | 0.89    | 0.19           | 0.43               |
| PF3D7_0101000   | rifin (RIF)                                                             | 2.13    | 0.10           | 0.60               |
| PF3D7_0101100   | exported protein family 4 (EPF4)                                        | -4.32   | 208.37         | 11.80              |
| PF3D7_0101200   | exported protein family 3 (EPF3)                                        | -3.81   | 87.72          | 7.03               |
| PF3D7_0101300   | Pfmc-2TM Maurer's cleft two transmembrane protein (MC-2TM)              | 0.55    | 1.27           | 2.12               |
| PF3D7_0101400   | exported protein family 1, pseudogene (EPF1)                            | -1.81   | 5.52           | 1.77               |
| PF3D7_0101500   | erythrocyte membrane protein 1 (PfEMP1), exon 2, pseudogene (VAR)       | 0.09    | 1.54           | 1.85               |
| PF3D7_0101600   | rifin (RIF)                                                             | 0.84    | 1.37           | 2.79               |
| PF3D7_0101700   | erythrocyte membrane protein 1 (PfEMP1), exon 2, pseudogene (VAR)       | 1.55    | 0.07           | 0.26               |
| PF3D7_0101800   | stevor                                                                  | 1.62    | 0.10           | 0.43               |
| PF3D7_0101900   | rifin (RIF)                                                             | 3.37    | 0.13           | 1.76               |
| PF3D7_0102000   | Plasmodium exported protein (PHISTa), unknown function, pseudogene      | 0.89    | 0.12           | 0.28               |
| PF3D7_0102100   | stevor, pseudogene                                                      | 0.15    | 0.64           | 0.81               |
| PF3D7_0102200   | ring-infected erythrocyte surface antigen (RESA)                        | 0.49    | 3564.38        | 5663.16            |
| PF3D7_0102300   | Plasmodium exported protein, unknown function                           | 1.11    | 29.23          | 71.46              |
| PF3D7_0102400   | lysophospholipase, putative, pseudogene                                 | 0.63    | 3.97           | 6.95               |
| PF3D7_0102500   | erythrocyte binding antigen-181 (EBA181)                                | 4.06    | 31.98          | 604.35             |
| PF3D7_0102600   | serine/threonine protein kinase, FIKK family (FIKK1)                    | -0.23   | 18.09          | 17.38              |
| PF3D7_0102700   | merozoite-associated tryptophan-rich antigen (MaTrA)                    | 0.84    | 31.35          | 63.42              |
| PF3D7_0102800   | conserved Plasmodium protein, unknown function                          | 0.82    | 0.61           | 1.24               |
| PF3D7_0102900   | aspartate-tRNA ligase                                                   | -1.56   | 119.87         | 46.03              |
| PF3D7_0103000   | vacuolar protein sorting-associated protein VTA1, putative              | 0.11    | 4.37           | 5.35               |
| PF3D7_0103100   | vacuolar protein sorting-associated protein 51, putative (VPS51)        | -0.29   | 6.31           | 5.83               |
| PF3D7_0103200   | nucleoside transporter 4 (NT4)                                          | 0.05    | 51.25          | 60.11              |
| PF3D7_0103300   | conserved Plasmodium protein, unknown function                          | -0.53   | 57.37          | 44.72              |
| PF3D7_0103400   | zinc-carboxypeptidase, putative                                         | 1.64    | 23.07          | 81.35              |
| PF3D7_0103500   | conserved Plasmodium protein, unknown function                          | 0.65    | 2.46           | 4.35               |
| PF3D7_0103600   | ATP-dependent RNA helicase, putative                                    | 0.73    | 5.09           | 9.53               |
| PF3D7_0103700   | L-seryl-tRNA(Sec) kinase, putative (PSTK)                               | -0.30   | 8.11           | 7.45               |
| PF3D7_0103800   | actin-related protein (ARP1)                                            | 0.48    | 9.84           | 15.52              |
| PF3D7_0103900   | parasite-infected erythrocyte surface protein (PIEPS15)                 | 0.07    | 12.28          | 14.60              |
| PF3D7_0104000   | thrombospondin-related sporozoite protein (TRSP)                        | 0.58    | 2.09           | 3.57               |
| PF3D7_0104100   | conserved Plasmodium membrane protein, unknown function                 | 0.35    | 9.32           | 13.44              |
| PF3D7_0104200   | StAR-related lipid transfer protein                                     | 2.01    | 77.40          | 350.97             |
| PF3D7_0104300   | ubiquitin carboxyl-terminal hydrolase 1, putative (UBP1)                | 1.21    | 105.35         | 275.97             |
| PF3D7_0104400   | 4-hydroxy-3-methylbut-2-enyl diphosphate reductase (LytB)               | 1.42    | 15.20          | 46.00              |
| PF3D7_0104500   | conserved protein, unknown function                                     | -1.05   | 71.76          | 39.24              |
| PF3D7_0104600   | conserved Plasmodium protein, unknown function                          | -0.52   | 3.30           | 2.60               |
| PF3D7_0104700   | transporter, putative                                                   | 1.51    | 0.20           | 0.67               |
| PF3D7_0104800   | novel putative transporter 1 (NPT1)                                     | 1.17    | 14.49          | 36.98              |
| PF3D7_0104900   | RNase MRP                                                               | -0.54   | 48.14          | 37.40              |
| PF3D7_0105000   | unspecified product                                                     | -0.99   | 42.56          | 24.10              |
| PF3D7_0105100   | conserved Plasmodium protein, unknown function                          | 0.66    | 4.10           | 7.35               |
| PF3D7_0105200   | RAP protein, putative                                                   | 0.58    | 15.67          | 26.51              |
| PF3D7_0105300   | cyclase-associated protein (CAP)                                        | 0.10    | 84.01          | 101.96             |
| PF3D7_0105400.1 | conserved Plasmodium protein, unknown function                          | 0.54    | 29.65          | 48.66              |
| PF3D7_0105400.2 | conserved Plasmodium protein, unknown function                          | 0.50    | 29.87          | 47.76              |
| PF3D7_0105500   | conserved Plasmodium protein, unknown function                          | 0.42    | 2.32           | 3.50               |
| PF3D7_0105600   | conserved Plasmodium protein, unknown function                          | -1.48   | 28.25          | 11.42              |
| PF3D7_0105700   | asparagine-rich antigen PfA35-2                                         | 1.07    | 9.07           | 21.57              |
| PF3D7_0105800   | conserved Plasmodium protein, unknown function                          | 0.72    | 33.18          | 61.74              |
| PF3D7_0105900   | DNA binding protein, putative                                           | 0.94    | 4.17           | 9.07               |
| PF3D7_0106000   | conserved Plasmodium protein, unknown function                          | 0.32    | 22.75          | 32.03              |
| PF3D7_0106100   | V-type proton ATPase subunit C, putative                                | -0.63   | 51.97          | 37.93              |
| PF3D7_0106200   | conserved Plasmodium protein, unknown function                          | -1.14   | 9.13           | 4.66               |
| PF3D7_0106300   | calcium-transporting ATPase (ATP6)                                      | -0.73   | 199.11         | 135.63             |
| PF3D7_0106400   | pre-rRNA-processing protein TSR2, putative                              | -1.22   | 152.04         | 73.95              |
| PF3D7_0106500   | conserved Plasmodium protein, unknown function                          | 0.53    | 4.65           | 7.60               |
| PF3D7_0106600   | conserved Plasmodium protein, unknown function                          | 2.08    | 0.90           | 4.37               |
| PF3D7_0106700   | small ribosomal subunit assembling AARP2 protein (AARP2)                | -0.85   | 144.35         | 90.37              |
| PF3D7_0106800   | ras-related protein Rab-5C (RAB5c)                                      | 0.07    | 22.61          | 26.80              |
| PF3D7_0106900   | 2-C-methyl-D-erythritol 4-phosphate cytidyltransferase, putative (IspD) | 0.26    | 6.97           | 9.40               |
| PF3D7_0107000   | centrin-1 (CEN1)                                                        | 1.39    | 30.57          | 90.49              |
| PF3D7_0107100   | conserved Plasmodium protein, unknown function                          | 0.70    | 1.19           | 2.20               |
| PF3D7_0107200   | carbon catabolite repressor protein 4, putative                         | 1.45    | 1.55           | 4.82               |
| PF3D7_0107300   | probable protein, unknown function                                      | 2.21    | 1.12           | 5.94               |
| PF3D7_0107400   | conserved Plasmodium protein, unknown function                          | 0.54    | 10.62          | 17.42              |
| PF3D7_0107500   | lipid/sterol:H <sup>+</sup> symporter                                   | -0.55   | 484.49         | 374.37             |
| PF3D7_0107600   | serine/threonine protein kinase, putative                               | 2.40    | 0.22           | 1.33               |
| PF3D7_0107700   | conserved Plasmodium membrane protein, unknown function                 | 1.00    | 1.42           | 3.23               |
| PF3D7_0107800   | double-strand break repair protein MRE11 (MRE11)                        | 0.53    | 5.87           | 9.58               |
| PF3D7_0107900   | conserved Plasmodium protein, unknown function                          | -0.59   | 11.98          | 8.99               |
| PF3D7_0108000   | proteasome subunit beta type-3, putative                                | 0.12    | 166.79         | 204.87             |
| PF3D7_0108100   | conserved Plasmodium protein, unknown function                          | 0.20    | 2.97           | 3.85               |
| PF3D7_0108300   | conserved Plasmodium protein, unknown function                          | -0.70   | 449.65         | 312.51             |
| PF3D7_0108400.1 | mitochondrial carrier protein, putative                                 | 0.17    | 19.94          | 25.38              |
| PF3D7_0108400.2 | mitochondrial carrier protein, putative                                 | -0.02   | 18.90          | 21.05              |
| PF3D7_0108500   | conserved Plasmodium protein, unknown function                          | 0.44    | 3164.61        | 4846.82            |
| PF3D7_0108600   | conserved Plasmodium protein, unknown function                          | 0.39    | 7.49           | 11.09              |
| PF3D7_0108700   | secreted ookinete protein, putative (PSOP24)                            | -0.31   | 86.44          | 78.56              |
| PF3D7_0108800   | conserved Plasmodium protein, unknown function                          | -0.03   | 14.42          | 16.00              |
| PF3D7_0108900   | unspecified product                                                     | 3.01    | 2.87           | 26.54              |
| PF3D7_0109000   | photosensitized INA-labeled protein PHIL1, putative (PHIL1)             | 2.95    | 55.88          | 487.23             |
| PF3D7_0109100   | LCCL domain-containing protein (CCp5)                                   | 1.95    | 6.71           | 29.39              |
| PF3D7_0109200   | mRNA cleavage factor-like protein, putative                             | -0.60   | 20.48          | 15.25              |
| PF3D7_0109300   | fatty acid elongation protein, GNS1/SUR4 family, putative               | 0.29    | 4.51           | 6.26               |
| PF3D7_0109400   | tubulin-specific chaperone a, putative                                  | 1.36    | 17.93          | 52.21              |
| PF3D7_0109500   | N-acetyltransferase, putative                                           | -0.76   | 71.65          | 47.89              |

|                 |                                                                                |       |          |         |
|-----------------|--------------------------------------------------------------------------------|-------|----------|---------|
| PF3D7_0109600   | cold-shock protein, putative                                                   | -1.52 | 15.77    | 6.20    |
| PF3D7_0109700   | conserved protein, unknown function                                            | -1.98 | 47.96    | 13.66   |
| PF3D7_0109800   | phenylalanine--tRNA ligase alpha subunit                                       | -1.75 | 107.03   | 35.94   |
| PF3D7_0109900.1 | unspecified product                                                            | -0.11 | 6.88     | 7.18    |
| PF3D7_0109900.2 | unspecified product                                                            | -0.14 | 6.90     | 7.05    |
| PF3D7_0110000   | conserved Plasmodium protein, unknown function                                 | 1.22  | 22.69    | 59.63   |
| PF3D7_0110100   | selenocysteine-specific elongation factor selB homologue, putative             | -1.33 | 16.67    | 7.48    |
| PF3D7_0110200   | FAD-linked sulfhydryl oxidase ERV1, putative (ERV1)                            | -0.36 | 8.09     | 7.13    |
| PF3D7_0110300   | Plasmodium RNA of unknown function RUF5                                        | -1.38 | 2.20     | 0.92    |
| PF3D7_0110400   | DNA-directed RNA polymerase 2, putative                                        | -0.56 | 124.99   | 96.00   |
| PF3D7_0110500   | bromodomain protein, putative                                                  | 0.83  | 19.74    | 39.69   |
| PF3D7_0110600   | phosphatidylinositol-4-phosphate 5-kinase (PIP5K)                              | -0.82 | 180.23   | 115.33  |
| PF3D7_0110700   | chromatin assembly factor 1 protein WD40 domain, putative                      | 1.08  | 27.74    | 66.15   |
| PF3D7_0110800   | transcription initiation factor TFIIIB, putative                               | -0.01 | 145.54   | 163.48  |
| PF3D7_0110900   | adenylate kinase-like protein 1 (AKLP1)                                        | -2.13 | 14.41    | 3.68    |
| PF3D7_0111000   | kinesin-8, putative                                                            | 0.41  | 18.80    | 28.17   |
| PF3D7_0111200   | conserved Plasmodium protein, unknown function                                 | 0.62  | 2.36     | 4.18    |
| PF3D7_0111300   | replication factor c protein, putative                                         | 0.92  | 8.00     | 17.14   |
| PF3D7_0111400   | conserved Plasmodium protein, unknown function (GEXP19)                        | 0.41  | 7.70     | 11.52   |
| PF3D7_0111500   | UMP-CMP kinase, putative                                                       | 0.32  | 41.03    | 57.91   |
| PF3D7_0111600   | conserved Plasmodium protein, unknown function                                 | -1.73 | 3.81     | 1.28    |
| PF3D7_0111700   | conserved Plasmodium protein, unknown function                                 | -2.96 | 0.70     | 0.06    |
| PF3D7_0111800   | conserved Plasmodium protein, unknown function                                 | -0.10 | 18.30    | 19.27   |
| PF3D7_0111900   | conserved protein, unknown function                                            | -0.65 | 24.04    | 17.27   |
| PF3D7_0112000   | TatD-like deoxyribonuclease, putative                                          | -1.11 | 19.05    | 9.96    |
| PF3D7_0112100   | conserved Plasmodium protein, unknown function                                 | -0.45 | 2.69     | 2.22    |
| PF3D7_0112200   | multidrug resistance-associated protein 1 (MRP1)                               | 0.60  | 9.24     | 15.87   |
| PF3D7_0112300   | 18S ribosomal RNA                                                              | 0.81  | 15.47    | 30.72   |
| PF3D7_0112400   | unspecified product                                                            | -0.38 | 0.00     | 0.00    |
| PF3D7_0112500   | 5.8S ribosomal RNA                                                             | 1.04  | 0.37     | 1.13    |
| PF3D7_0112600   | unspecified product                                                            | 1.21  | 0.20     | 0.58    |
| PF3D7_0112700   | 28S ribosomal RNA                                                              | 1.25  | 15.67    | 42.12   |
| PF3D7_0112800   | Plasmodium exported protein (hyp11), unknown function                          | -1.15 | 20.97    | 10.64   |
| PF3D7_0112900   | Plasmodium exported protein, unknown function                                  | 1.06  | 7.03     | 16.57   |
| PF3D7_0113000   | glutamic acid-rich protein (GARP)                                              | -1.05 | 825.39   | 451.56  |
| PF3D7_0113100   | surface-associated interspersed protein 1.1 (SURFIN 1.1) (SURF1.1)             | 1.94  | 0.53     | 2.30    |
| PF3D7_0113200   | Plasmodium exported protein, unknown function                                  | 0.68  | 22.82    | 41.31   |
| PF3D7_0113300   | Plasmodium exported protein (hyp1), unknown function                           | -1.53 | 176.57   | 69.01   |
| PF3D7_0113400   | Plasmodium exported protein, unknown function                                  | -0.60 | 2.80     | 2.09    |
| PF3D7_0113600   | surface-associated interspersed protein 1.2 (SURFIN 1.2), pseudogene (SURF1.2) | -0.65 | 3.33     | 2.39    |
| PF3D7_0113700   | heat shock protein 40, type II (HSP40)                                         | -1.53 | 266.00   | 103.88  |
| PF3D7_0113800   | DBL containing protein, unknown function                                       | -2.33 | 413.91   | 92.73   |
| PF3D7_0113900   | Plasmodium exported protein (hyp8), unknown function (GEXP10)                  | -2.57 | 114.78   | 21.89   |
| PF3D7_0114000   | exported protein family 1 (EPF1)                                               | 2.63  | 7.42     | 52.02   |
| PF3D7_0114100   | Pfmc-2TM Maurer's cleft two transmembrane protein (MC-2TM)                     | 1.04  | 3.34     | 7.80    |
| PF3D7_0114200   | exported protein family 3 (EPF3)                                               | 1.26  | 0.19     | 0.56    |
| PF3D7_0114300   | exported protein family 4, pseudogene (EPF4)                                   | 0.92  | 0.75     | 1.62    |
| PF3D7_0114400   | erythrocyte membrane protein 1 (PEMP1), exon 2, pseudogene (VAR)               | 1.01  | 0.19     | 0.47    |
| PF3D7_0114500   | Plasmodium exported protein (hyp10), unknown function                          | 2.49  | 1.21     | 8.08    |
| PF3D7_0114600   | stevor, pseudogene                                                             | 0.99  | 0.26     | 0.62    |
| PF3D7_0114700   | rifin (RIF)                                                                    | -0.66 | 0.37     | 0.26    |
| PF3D7_0114800   | Plasmodium exported protein (hyp7), unknown function                           | -4.69 | 4.88     | 0.18    |
| PF3D7_0114900   | Plasmodium exported protein, unknown function, pseudogene                      | -4.90 | 0.77     | 0.00    |
| PF3D7_0115000   | surface-associated interspersed protein 1.3 (SURFIN 1.3) (SURF1.3)             | -0.05 | 1.16     | 1.27    |
| PF3D7_0115100   | Plasmodium exported protein (PHISTa), unknown function                         | 1.10  | 1.52     | 3.73    |
| PF3D7_0115200   | rifin (RIF)                                                                    | 0.36  | 0.10     | 0.16    |
| PF3D7_0115300   | rifin (RIF)                                                                    | 1.55  | 0.09     | 0.35    |
| PF3D7_0115400   | stevor                                                                         | 0.11  | 0.10     | 0.13    |
| PF3D7_0115500   | erythrocyte membrane protein 1 (PEMP1), pseudogene                             | -0.04 | 0.24     | 0.27    |
| PF3D7_0115600   | rifin (RIF)                                                                    | -1.82 | 3.12     | 0.99    |
| PF3D7_0115700   | erythrocyte membrane protein 1, PEMP1 (VAR)                                    | 0.17  | 0.81     | 1.03    |
| PF3D7_0200100   | erythrocyte membrane protein 1, PEMP1 (VAR)                                    | 0.62  | 3.46     | 6.02    |
| PF3D7_0200200   | rifin (RIF)                                                                    | -0.85 | 7.91     | 4.95    |
| PF3D7_0200300   | erythrocyte membrane protein 1 (PEMP1), exon 2                                 | 2.06  | 0.52     | 2.53    |
| PF3D7_0200400   | stevor                                                                         | -0.38 | 0.00     | 0.00    |
| PF3D7_0200500   | rifin (RIF)                                                                    | 1.62  | 0.00     | 0.05    |
| PF3D7_0200600   | rifin (RIF)                                                                    | 1.50  | 0.04     | 0.17    |
| PF3D7_0200700   | rifin (RIF)                                                                    | 2.43  | 0.00     | 0.12    |
| PF3D7_0200800   | erythrocyte membrane protein 1 (PEMP1), exon 2, pseudogene                     | 0.21  | 0.02     | 0.04    |
| PF3D7_0200900   | stevor, pseudogene                                                             | 1.47  | 0.10     | 0.37    |
| PF3D7_0201000   | rifin (RIF)                                                                    | 0.36  | 0.05     | 0.08    |
| PF3D7_0201100   | Plasmodium exported protein, unknown function, fragment                        | -0.38 | 0.00     | 0.00    |
| PF3D7_0201200   | rifin (RIF)                                                                    | 1.21  | 0.04     | 0.15    |
| PF3D7_0201300   | stevor                                                                         | 1.62  | 0.10     | 0.40    |
| PF3D7_0201400   | Plasmodium exported protein (hyp10), unknown function                          | 3.71  | 0.00     | 0.66    |
| PF3D7_0201500   | Plasmodium exported protein (hyp9), unknown function                           | 0.99  | 13.26    | 29.78   |
| PF3D7_0201600   | PHISTb domain-containing RESA-like protein 1 (RLP1)                            | -1.85 | 214.81   | 67.09   |
| PF3D7_0201700   | DnaJ protein, putative                                                         | -1.07 | 289.56   | 155.93  |
| PF3D7_0201800   | knob associated heat shock protein 40 (KAHsp40)                                | -1.62 | 356.34   | 130.84  |
| PF3D7_0201900   | erythrocyte membrane protein 3 (EMP3)                                          | -1.90 | 1705.52  | 516.30  |
| PF3D7_0202000   | knob-associated histidine-rich protein (KAHRP)                                 | -2.19 | 18659.40 | 4612.33 |
| PF3D7_0202100   | liver stage associated protein 2 (LSAP2)                                       | 1.15  | 259.97   | 651.33  |
| PF3D7_0202200   | EMP1-trafficking protein (PTP1)                                                | -1.80 | 706.58   | 228.50  |
| PF3D7_0202300   | Plasmodium exported protein (hyp11), unknown function                          | 0.80  | 4.04     | 7.98    |
| PF3D7_0202400   | gamete antigen 27/25, putative                                                 | 1.97  | 48.22    | 212.80  |
| PF3D7_0202500   | early transcribed membrane protein 2 (ETRAPM2)                                 | -0.54 | 4801.55  | 3722.17 |
| PF3D7_0202600.1 | conserved Plasmodium protein, unknown function                                 | -0.07 | 21.01    | 22.68   |
| PF3D7_0202600.2 | conserved Plasmodium protein, unknown function                                 | -0.07 | 21.02    | 22.70   |
| PF3D7_0202700   | octaprenyl pyrophosphate synthase (OPP)                                        | 0.49  | 4.29     | 6.82    |
| PF3D7_0202800   | conserved Plasmodium protein, unknown function                                 | 0.86  | 4.13     | 8.54    |
| PF3D7_0202900   | palmitoyltransferase, putative (DHH12)                                         | 0.47  | 5.52     | 8.68    |
| PF3D7_0203000   | repetitive organellar protein, putative (ROPE)                                 | 2.06  | 15.42    | 72.62   |
| PF3D7_0203100   | protein kinase, putative                                                       | 2.45  | 6.07     | 37.61   |
| PF3D7_0203200   | conserved Plasmodium protein, unknown function                                 | -1.47 | 37.76    | 15.44   |
| PF3D7_0203300   | ERCC1 nucleotide excision repair protein, putative (ERCC1)                     | -0.30 | 11.98    | 10.99   |
| PF3D7_0203400   | conserved Plasmodium protein, unknown function                                 | 0.90  | 19.07    | 40.39   |
| PF3D7_0203500   | tRNA Glutamine                                                                 | -0.38 | 0.00     | 0.00    |
| PF3D7_0203600   | conserved Plasmodium protein, unknown function                                 | -0.73 | 3.17     | 2.16    |

|                 |                                                                      |       |         |         |
|-----------------|----------------------------------------------------------------------|-------|---------|---------|
| PF3D7_0203700   | protein MAK16, putative (MAK16)                                      | -0.67 | 221.45  | 156.84  |
| PF3D7_0203800   | conserved Plasmodium protein, unknown function                       | 0.89  | 2.60    | 5.44    |
| PF3D7_0203900   | 5'-3' exonuclease, N-terminal resolvase-like domain, putative        | 1.13  | 4.90    | 12.15   |
| PF3D7_0204000   | conserved Plasmodium protein, unknown function                       | 0.73  | 1.97    | 3.70    |
| PF3D7_0204100   | conserved Plasmodium protein, unknown function                       | 0.36  | 31.58   | 45.91   |
| PF3D7_0204200   | conserved Plasmodium protein, unknown function                       | 1.13  | 123.19  | 303.87  |
| PF3D7_0204300   | conserved Plasmodium protein, unknown function                       | -1.51 | 75.68   | 30.01   |
| PF3D7_0204400   | dynein light chain, putative                                         | -1.65 | 19.22   | 6.86    |
| PF3D7_0204500   | aspartate transaminase (AspAT)                                       | -1.25 | 67.00   | 31.70   |
| PF3D7_0204600   | conserved Plasmodium protein, unknown function                       | 0.22  | 5.38    | 7.05    |
| PF3D7_0204700   | hexose transporter (HT)                                              | -0.97 | 282.22  | 162.82  |
| PF3D7_0204800   | 3'-5' exonuclease, putative                                          | 0.10  | 5.60    | 6.78    |
| PF3D7_0204900   | ubiE/COQ5 methyltransferase, putative                                | 0.77  | 7.87    | 15.17   |
| PF3D7_0205000   | conserved Plasmodium protein, unknown function                       | 0.27  | 1.58    | 2.17    |
| PF3D7_0205100   | conserved Plasmodium protein, unknown function                       | 1.22  | 1.10    | 2.91    |
| PF3D7_0205200   | conserved Plasmodium protein, unknown function                       | 1.03  | 1.17    | 2.77    |
| PF3D7_0205300   | conserved Plasmodium protein, unknown function                       | 1.29  | 0.39    | 1.10    |
| PF3D7_0205400   | PCI domain-containing protein, putative                              | -1.49 | 42.57   | 17.06   |
| PF3D7_0205500   | DNA-directed RNA polymerase II 16 kDa subunit, putative              | -0.75 | 72.76   | 48.99   |
| PF3D7_0205600   | conserved Plasmodium protein, unknown function                       | -0.27 | 12.69   | 11.87   |
| PF3D7_0205700.1 | conserved Plasmodium protein, unknown function                       | -1.31 | 60.89   | 27.78   |
| PF3D7_0205700.2 | conserved Plasmodium protein, unknown function                       | -1.30 | 56.28   | 25.72   |
| PF3D7_0205800   | conserved Plasmodium protein, unknown function                       | 0.35  | 11.91   | 17.13   |
| PF3D7_0205900   | 26S proteasome regulatory subunit RPN1, putative (RPN1)              | 0.09  | 104.96  | 125.97  |
| PF3D7_0206000   | DNA repair protein RAD2, putative (RAD2)                             | 0.85  | 46.39   | 94.56   |
| PF3D7_0206100   | cysteine desulfuration protein SufE (SufE)                           | 0.05  | 45.13   | 52.88   |
| PF3D7_0206200   | pantothenate transporter (PAT)                                       | 2.25  | 26.16   | 140.47  |
| PF3D7_0206300   | pentafunctional AROM polypeptide, putative, pseudogene (AROM)        | -0.34 | 33.64   | 30.01   |
| PF3D7_0206500   | conserved Plasmodium protein, unknown function                       | -1.24 | 127.91  | 60.96   |
| PF3D7_0206600   | DNA-directed RNA polymerase III subunit RPC10, putative              | -1.50 | 22.54   | 8.99    |
| PF3D7_0206700   | adenylosuccinate lyase (ASL)                                         | 0.36  | 85.96   | 124.29  |
| PF3D7_0206800   | merozoite surface protein 2 (MSP2)                                   | 2.18  | 813.36  | 4157.75 |
| PF3D7_0206900.1 | merozoite surface protein 5 (MSP5)                                   | 3.69  | 20.70   | 301.90  |
| PF3D7_0206900.2 | merozoite surface protein 5 (MSP5)                                   | 3.66  | 21.40   | 306.61  |
| PF3D7_0207000   | merozoite surface protein 4 (MSP4)                                   | 1.80  | 154.47  | 607.77  |
| PF3D7_0207100   | conserved Plasmodium protein, unknown function                       | 2.57  | 18.05   | 121.34  |
| PF3D7_0207200   | iron-sulfur assembly protein, putative (IscA1)                       | 1.66  | 7.19    | 25.79   |
| PF3D7_0207300   | serine repeat antigen 8 (SERA8)                                      | 3.94  | 0.24    | 4.37    |
| PF3D7_0207400   | serine repeat antigen 7 (SERA7)                                      | 0.84  | 48.05   | 97.02   |
| PF3D7_0207500   | serine repeat antigen 6 (SERA6)                                      | 0.49  | 81.92   | 129.58  |
| PF3D7_0207600   | serine repeat antigen 5 (SERA5)                                      | -0.22 | 744.09  | 721.23  |
| PF3D7_0207700   | serine repeat antigen 4 (SERA4)                                      | -0.23 | 52.80   | 50.98   |
| PF3D7_0207800   | serine repeat antigen 3 (SERA3)                                      | 0.44  | 40.83   | 62.73   |
| PF3D7_0207900   | serine repeat antigen 2 (SERA2)                                      | 0.69  | 11.51   | 21.04   |
| PF3D7_0208000   | serine repeat antigen 1 (SERA1)                                      | 0.81  | 22.64   | 44.93   |
| PF3D7_0208100.1 | conserved Plasmodium protein, unknown function                       | 0.74  | 11.73   | 22.17   |
| PF3D7_0208100.2 | unspecified product                                                  | 0.74  | 11.72   | 22.17   |
| PF3D7_0208200   | KRR1 small subunit processome component, putative (KRR1)             | -1.15 | 144.42  | 73.32   |
| PF3D7_0208300   | conserved Plasmodium protein, unknown function                       | -1.24 | 23.06   | 11.05   |
| PF3D7_0208400   | conserved Plasmodium protein, unknown function                       | -0.76 | 29.54   | 19.69   |
| PF3D7_0208500   | acyl carrier protein (ACP)                                           | 0.37  | 11.04   | 16.15   |
| PF3D7_0208600   | ribosome-recycling factor (RRF1)                                     | 1.01  | 16.12   | 36.74   |
| PF3D7_0208700.1 | conserved Plasmodium protein, unknown function                       | -0.63 | 45.92   | 33.58   |
| PF3D7_0208700.2 | conserved Plasmodium protein, unknown function                       | -0.58 | 47.31   | 35.69   |
| PF3D7_0208800   | conserved Plasmodium protein, unknown function                       | -1.71 | 22.78   | 7.85    |
| PF3D7_0208900   | 6-cysteine protein (P230p)                                           | 0.55  | 0.43    | 0.72    |
| PF3D7_0209000   | 6-cysteine protein (P230)                                            | 1.54  | 0.49    | 1.60    |
| PF3D7_0209100   | phospholipase A2, putative                                           | -0.84 | 71.81   | 45.46   |
| PF3D7_0209200   | 3'exoribonuclease, putative                                          | -0.95 | 51.35   | 29.92   |
| PF3D7_0209300   | 2C-methyl-D-erythritol 2,4-cyclodiphosphate synthase (IspF)          | -0.27 | 16.48   | 15.47   |
| PF3D7_0209400   | conserved protein, unknown function                                  | -0.13 | 18.74   | 19.29   |
| PF3D7_0209500   | conserved Plasmodium protein, unknown function                       | 3.71  | 3.28    | 48.89   |
| PF3D7_0209600   | transporter, putative                                                | 0.27  | 17.10   | 23.27   |
| PF3D7_0209700   | RING zinc finger protein, putative                                   | -0.76 | 211.89  | 141.01  |
| PF3D7_0209800   | ATP-dependent RNA helicase UAP56 (UAP56)                             | -1.03 | 660.37  | 364.42  |
| PF3D7_0209900   | unspecified product                                                  | -2.07 | 8.19    | 2.17    |
| PF3D7_0210000   | secretory complex protein 61 gamma subunit (Sec61-gamma)             | -0.84 | 289.83  | 182.39  |
| PF3D7_0210100.1 | 60S ribosomal protein L37ae, putative                                | -0.12 | 784.22  | 816.38  |
| PF3D7_0210100.2 | 60S ribosomal protein L37ae, putative                                | -0.16 | 1290.05 | 1304.59 |
| PF3D7_0210200   | conserved Plasmodium protein, unknown function                       | 0.66  | 13.75   | 24.61   |
| PF3D7_0210300   | monocarboxylate transporter, putative                                | 0.26  | 16.74   | 22.68   |
| PF3D7_0210400   | 50S ribosomal protein L33, putative                                  | 1.03  | 3.61    | 8.39    |
| PF3D7_0210500   | conserved Plasmodium protein, unknown function                       | 0.66  | 2.27    | 4.04    |
| PF3D7_0210600   | conserved Plasmodium protein, unknown function                       | 2.89  | 27.54   | 230.32  |
| PF3D7_0210700   | syntaxin, Qa-SNARE family (SYN17)                                    | 1.84  | 9.17    | 37.25   |
| PF3D7_0210800   | conserved Plasmodium protein, unknown function                       | -0.73 | 61.13   | 41.54   |
| PF3D7_0210900   | conserved Plasmodium protein, unknown function                       | -0.96 | 345.58  | 200.58  |
| PF3D7_0211000   | unspecified product                                                  | -1.51 | 12.81   | 5.07    |
| PF3D7_0211100   | conserved Plasmodium protein, unknown function                       | 0.92  | 0.50    | 1.08    |
| PF3D7_0211200   | ras-related protein Rab-5A (RAB5a)                                   | 0.21  | 9.27    | 12.09   |
| PF3D7_0211300   | ubiquinol-cytochrome-c reductase complex assembly factor 1, putative | -0.40 | 5.33    | 4.57    |
| PF3D7_0211400   | beta-ketoacyl-ACP synthase III (KASIII)                              | 0.35  | 1.45    | 2.10    |
| PF3D7_0211500   | GAF domain-related protein, putative                                 | 0.89  | 3.84    | 8.02    |
| PF3D7_0211600   | dolichol-linked oligosaccharide biosynthesis enzyme, putative        | -0.88 | 7.36    | 4.52    |
| PF3D7_0211700   | tyrosine kinase-like protein, putative (TKL1)                        | 0.96  | 4.19    | 9.24    |
| PF3D7_0211800   | asparagine-tRNA ligase (AsnRS)                                       | -1.03 | 176.06  | 97.22   |
| PF3D7_0211900   | conserved Plasmodium protein, unknown function                       | 0.49  | 8.11    | 12.84   |
| PF3D7_0212000   | GDP-fructose:GMP antiporter, putative                                | 0.34  | 6.29    | 9.00    |
| PF3D7_0212100   | conserved Plasmodium protein, unknown function                       | -1.20 | 75.42   | 37.03   |
| PF3D7_0212200   | mitochondrial ribosomal protein L12 precursor, putative              | -0.47 | 19.31   | 15.71   |
| PF3D7_0212300   | peptide chain release factor subunit 1, putative                     | -0.86 | 311.28  | 194.24  |
| PF3D7_0212400   | conserved Plasmodium membrane protein, unknown function              | -1.20 | 21.27   | 10.46   |
| PF3D7_0212500   | conserved Plasmodium protein, unknown function                       | -0.82 | 52.15   | 33.46   |
| PF3D7_0212600   | secreted protein with altered thrombospondin repeat domain (SPATR)   | 3.74  | 23.74   | 358.36  |
| PF3D7_0212700   | SRR1-like protein                                                    | -0.07 | 7.13    | 7.69    |
| PF3D7_0212800   | multidrug efflux pump, putative                                      | 0.50  | 4.60    | 7.35    |
| PF3D7_0212900   | Leu/Phe-tRNA protein transferase, putative                           | 0.84  | 46.23   | 93.37   |
| PF3D7_0213000   | conserved Plasmodium protein, unknown function                       | 0.46  | 14.62   | 22.68   |

|                 |                                                                  |       |         |         |
|-----------------|------------------------------------------------------------------|-------|---------|---------|
| PF3D7_0213100   | protein SIS1 (SIS1)                                              | -0.17 | 100.13  | 100.41  |
| PF3D7_0213200   | conserved Plasmodium protein, unknown function                   | 0.95  | 5.64    | 12.38   |
| PF3D7_0213300   | conserved Plasmodium protein, unknown function                   | 1.13  | 3.31    | 8.31    |
| PF3D7_0213400   | protein kinase 7 (PK7)                                           | 0.77  | 6.95    | 13.41   |
| PF3D7_0213500   | conserved Plasmodium protein, unknown function                   | 0.76  | 7.48    | 14.35   |
| PF3D7_0213600   | conserved Plasmodium protein, unknown function                   | 0.30  | 0.85    | 1.19    |
| PF3D7_0213700   | conserved protein, unknown function                              | -1.38 | 51.30   | 22.30   |
| PF3D7_0213800   | conserved Plasmodium protein, unknown function                   | -1.21 | 2.77    | 1.35    |
| PF3D7_0213900   | conserved Plasmodium protein, unknown function                   | -0.66 | 33.74   | 24.09   |
| PF3D7_0214000   | T-complex protein 1 subunit theta (CCT8)                         | -1.09 | 171.52  | 91.10   |
| PF3D7_0214100   | protein transport protein SEC31 (SEC31)                          | -1.03 | 280.04  | 155.18  |
| PF3D7_0214200   | mitochondrial ribosomal protein L13 precursor, putative          | 0.65  | 20.82   | 37.06   |
| PF3D7_0214300   | conserved Plasmodium protein, unknown function                   | 1.45  | 5.13    | 15.85   |
| PF3D7_0214400   | conserved Plasmodium protein, unknown function                   | -0.98 | 102.52  | 58.80   |
| PF3D7_0214500   | conserved Plasmodium protein, unknown function                   | -1.77 | 1.90    | 0.61    |
| PF3D7_0214600   | serine/threonine protein kinase, putative                        | 4.16  | 7.30    | 146.90  |
| PF3D7_0214700   | conserved Plasmodium protein, unknown function                   | 2.08  | 15.13   | 72.45   |
| PF3D7_0214800   | conserved Plasmodium membrane protein, unknown function          | -0.96 | 73.50   | 42.64   |
| PF3D7_0214900   | rhopty neck protein 6 (RON6)                                     | 1.62  | 73.61   | 255.24  |
| PF3D7_0215000   | acyl-CoA synthetase (ACS9)                                       | 0.79  | 9.50    | 18.53   |
| PF3D7_0215100   | RING zinc finger protein, putative                               | -0.38 | 53.04   | 45.91   |
| PF3D7_0215200   | conserved Plasmodium protein, unknown function                   | 0.10  | 10.24   | 12.44   |
| PF3D7_0215300   | acyl-CoA synthetase (ACS8)                                       | -0.77 | 78.14   | 51.81   |
| PF3D7_0215400   | conserved Plasmodium protein, unknown function                   | -0.47 | 85.19   | 69.33   |
| PF3D7_0215500   | conserved Plasmodium protein, unknown function                   | -0.86 | 34.83   | 21.61   |
| PF3D7_0215600   | conserved Plasmodium protein, unknown function                   | -0.56 | 39.86   | 30.54   |
| PF3D7_0215700   | DNA-directed RNA polymerase II subunit RPB2, putative (RPB2)     | -0.77 | 107.23  | 70.91   |
| PF3D7_0215800   | origin recognition complex subunit 5 (ORC5)                      | 0.47  | 5.45    | 8.51    |
| PF3D7_0215900   | palmitoyltransferase, putative (DHH11)                           | 0.07  | 3.66    | 4.36    |
| PF3D7_0216000   | DEAD/DEAH box helicase, putative                                 | 1.58  | 3.73    | 12.64   |
| PF3D7_0216100   | conserved Plasmodium protein, unknown function                   | -0.66 | 3.53    | 2.53    |
| PF3D7_0216200   | conserved Plasmodium protein, unknown function                   | -1.32 | 34.03   | 15.39   |
| PF3D7_0216300   | conserved Plasmodium protein, unknown function                   | -0.95 | 10.92   | 6.37    |
| PF3D7_0216400   | vacuolar protein sorting-associated protein 45, putative (VPS45) | 0.26  | 5.62    | 7.59    |
| PF3D7_0216500   | conserved Plasmodium protein, unknown function                   | 0.55  | 2.44    | 4.04    |
| PF3D7_0216600   | MtN3-like protein                                                | -0.45 | 116.59  | 96.42   |
| PF3D7_0216700.1 | autophagy-related protein 11, putative (ATG11)                   | 4.03  | 12.44   | 229.05  |
| PF3D7_0216700.2 | autophagy-related protein 11, putative (ATG11)                   | 4.02  | 12.47   | 229.13  |
| PF3D7_0216800   | conserved Plasmodium membrane protein, unknown function          | 0.32  | 7.97    | 11.25   |
| PF3D7_0216900   | conserved Plasmodium protein, unknown function                   | 0.67  | 8.02    | 14.43   |
| PF3D7_0217000   | conserved Plasmodium membrane protein, unknown function          | 0.15  | 1.28    | 1.61    |
| PF3D7_0217100   | ATP synthase F1, alpha subunit                                   | 0.92  | 33.41   | 71.45   |
| PF3D7_0217200   | conserved Plasmodium protein, unknown function                   | 0.22  | 2.63    | 3.46    |
| PF3D7_0217300   | AP-2 complex subunit sigma, putative                             | -0.20 | 22.98   | 22.56   |
| PF3D7_0217400   | conserved Plasmodium protein, unknown function                   | 0.37  | 22.15   | 32.44   |
| PF3D7_0217500   | calcium-dependent protein kinase 1 (CDPK1)                       | 1.58  | 92.34   | 311.36  |
| PF3D7_0217600   | conserved Plasmodium protein, unknown function                   | -0.33 | 17.08   | 15.33   |
| PF3D7_0217700   | E2F-associated phosphoprotein, putative                          | -1.03 | 63.86   | 35.19   |
| PF3D7_0217800   | 40S ribosomal protein S26 (RPS26)                                | -0.97 | 1047.25 | 605.52  |
| PF3D7_0217900   | conserved Plasmodium protein, unknown function                   | 0.55  | 25.75   | 42.50   |
| PF3D7_0218000   | replication factor C subunit 2, putative (RFC2)                  | 0.87  | 20.32   | 42.12   |
| PF3D7_0218100   | conserved Plasmodium membrane protein, unknown function          | 0.69  | 5.08    | 9.25    |
| PF3D7_0218200   | conserved Plasmodium protein, unknown function                   | -0.29 | 10.17   | 9.39    |
| PF3D7_0218300   | apicoplast RNA methyltransferase precursor, putative             | 0.37  | 12.26   | 17.92   |
| PF3D7_0218400   | DEAD/DEAH box ATP-dependent RNA helicase, putative               | -1.31 | 84.03   | 38.24   |
| PF3D7_0218500   | small nuclear ribonucleoprotein Sm D2, putative (SNRPD2)         | -2.08 | 43.48   | 11.59   |
| PF3D7_0218600   | conserved Plasmodium protein, unknown function                   | -0.21 | 21.11   | 20.65   |
| PF3D7_0218700   | pre-mRNA-processing protein 45, putative (PRP45)                 | -0.59 | 74.70   | 55.94   |
| PF3D7_0218800   | ribonuclease P                                                   | -1.37 | 31.24   | 13.64   |
| PF3D7_0218900   | Plasmodium RNA of unknown function RUF2                          | -0.86 | 0.84    | 0.49    |
| PF3D7_0219000   | small nucleolar RNA snoR01                                       | -2.08 | 3.28    | 0.71    |
| PF3D7_0219100   | conserved protein, unknown function                              | -0.36 | 5.88    | 5.16    |
| PF3D7_0219200   | 40S ribosomal protein S30                                        | -1.14 | 488.36  | 249.85  |
| PF3D7_0219300   | conserved Plasmodium protein, unknown function                   | 0.23  | 18.08   | 16.68   |
| PF3D7_0219400.1 | ribosome associated membrane protein RAMP4, putative             | 0.04  | 116.68  | 135.22  |
| PF3D7_0219400.2 | ribosome associated membrane protein RAMP4, putative             | -0.37 | 99.37   | 86.66   |
| PF3D7_0219500   | pseudouridine synthase, putative                                 | 1.22  | 6.56    | 17.25   |
| PF3D7_0219600   | replication factor C subunit 1, putative (RFC1)                  | 0.43  | 18.47   | 28.09   |
| PF3D7_0219700   | Plasmodium exported protein (PHISTc), unknown function (GEXP20)  | -0.87 | 169.06  | 104.63  |
| PF3D7_0219800   | Plasmodium exported protein (PHISTc), unknown function           | 0.25  | 71.61   | 95.91   |
| PF3D7_0219900   | Plasmodium exported protein, unknown function                    | -1.08 | 134.92  | 72.22   |
| PF3D7_0220000   | liver stage antigen 3 (LSA3)                                     | 0.59  | 1060.59 | 1808.29 |
| PF3D7_0220100   | DnaJ protein, putative                                           | -0.90 | 145.21  | 88.18   |
| PF3D7_0220200   | Plasmodium exported protein, unknown function                    | -0.42 | 367.14  | 310.23  |
| PF3D7_0220300   | Plasmodium exported protein, unknown function                    | 1.07  | 7.01    | 16.68   |
| PF3D7_0220400   | DnaJ protein, putative, pseudogene                               | 1.23  | 3.38    | 8.99    |
| PF3D7_0220500   | Plasmodium exported protein (hyp2), unknown function             | 2.30  | 64.87   | 361.24  |
| PF3D7_0220600   | Plasmodium exported protein (hyp9), unknown function             | 0.35  | 44.01   | 63.16   |
| PF3D7_0220700   | Plasmodium exported protein (hyp9), unknown function             | -1.28 | 243.24  | 113.32  |
| PF3D7_0220800   | cytoadherence linked asexual protein 2 (CLAG2)                   | 0.53  | 46.22   | 75.25   |
| PF3D7_0220900   | Plasmodium exported protein, unknown function, pseudogene        | 1.21  | 0.00    | 0.06    |
| PF3D7_0221000   | Plasmodium exported protein, unknown function                    | -1.29 | 0.39    | 0.17    |
| PF3D7_0221100   | Plasmodium exported protein, unknown function, pseudogene        | 1.71  | 0.09    | 0.40    |
| PF3D7_0221200   | Plasmodium exported protein (hyp15), unknown function            | -0.67 | 16.70   | 11.83   |
| PF3D7_0221300   | Plasmodium exported protein, unknown function, pseudogene        | 1.95  | 0.00    | 0.07    |
| PF3D7_0221400   | stevor                                                           | 3.08  | 0.00    | 0.21    |
| PF3D7_0221500   | Pfmc-2TM Maurer's cleft two transmembrane protein, pseudogene    | 0.29  | 0.36    | 0.52    |
| PF3D7_0221600   | Plasmodium exported protein, unknown function, pseudogene        | -2.38 | 0.11    | 0.00    |
| PF3D7_0221700   | Plasmodium exported protein, unknown function                    | -2.95 | 58.43   | 8.51    |
| PF3D7_0221800   | hypothetical protein                                             | -3.51 | 10.31   | 0.93    |
| PF3D7_0221900   | erythrocyte membrane protein 1 (PEMP1), pseudogene               | -1.50 | 3.58    | 1.43    |
| PF3D7_0222000   | exported protein family 1 (EPF1)                                 | -0.84 | 13.77   | 8.70    |
| PF3D7_0222100   | Pfmc-2TM Maurer's cleft two transmembrane protein (MC-2TM)       | 1.17  | 0.71    | 1.86    |
| PF3D7_0222200   | exported protein family 3 (EPF3)                                 | -7.73 | 95.42   | 0.48    |
| PF3D7_0222300   | exported protein family 4, pseudogene (EPF4)                     | -6.77 | 129.43  | 1.31    |
| PF3D7_0222400   | rifin, pseudogene (RIF)                                          | -1.57 | 0.31    | 0.11    |
| PF3D7_0222500   | rifin (RIF)                                                      | 1.21  | 0.02    | 0.10    |
| PF3D7_0222600   | rifin (RIF)                                                      | 2.56  | 0.04    | 0.39    |

|               |                                                                                                       |       |         |        |
|---------------|-------------------------------------------------------------------------------------------------------|-------|---------|--------|
| PF3D7_0222700 | rifin (RIF)                                                                                           | -1.11 | 0.09    | 0.04   |
| PF3D7_0222800 | stevor                                                                                                | 0.62  | 0.05    | 0.11   |
| PF3D7_0222900 | erythrocyte membrane protein 1 (PfEMP1), exon 2, pseudogene (VAR)                                     | 0.85  | 0.03    | 0.09   |
| PF3D7_0223100 | rifin (RIF)                                                                                           | 0.15  | 0.18    | 0.24   |
| PF3D7_0223200 | rifin (RIF)                                                                                           | -1.96 | 0.04    | 0.00   |
| PF3D7_0223300 | erythrocyte membrane protein 1 (PfEMP1), exon 2                                                       | -0.79 | 1.02    | 0.66   |
| PF3D7_0223400 | rifin (RIF)                                                                                           | -0.37 | 4.76    | 4.16   |
| PF3D7_0223500 | erythrocyte membrane protein 1, PfEMP1 (VAR)                                                          | -0.01 | 3.22    | 3.63   |
| PF3D7_0300100 | erythrocyte membrane protein 1, PfEMP1 (VAR)                                                          | 0.45  | 5.31    | 8.19   |
| PF3D7_0300200 | rifin (RIF)                                                                                           | 0.63  | 1.85    | 3.26   |
| PF3D7_0300300 | erythrocyte membrane protein 1 (PfEMP1), exon 2, pseudogene (VAR)                                     | 0.11  | 0.55    | 0.68   |
| PF3D7_0300400 | stevor                                                                                                | 0.36  | 0.05    | 0.09   |
| PF3D7_0300500 | rifin (RIF)                                                                                           | 0.21  | 0.10    | 0.14   |
| PF3D7_0300600 | Plasmodium exported protein, unknown function, fragment                                               | -0.38 | 0.00    | 0.00   |
| PF3D7_0300700 | rifin (RIF)                                                                                           | 1.21  | 0.00    | 0.04   |
| PF3D7_0300800 | rifin (RIF)                                                                                           | 1.04  | 0.05    | 0.14   |
| PF3D7_0300900 | stevor-like                                                                                           | 0.54  | 0.55    | 0.93   |
| PF3D7_0301000 | acyl-CoA synthetase (ACS2)                                                                            | -2.07 | 4.42    | 1.18   |
| PF3D7_0301100 | Plasmodium exported protein (hyp13), unknown function                                                 | -2.13 | 2.32    | 0.58   |
| PF3D7_0301200 | serine/threonine protein kinase, FIKK family (FIKK3)                                                  | -1.43 | 73.19   | 30.58  |
| PF3D7_0301300 | alpha/beta hydrolase, putative                                                                        | -0.04 | 55.28   | 60.70  |
| PF3D7_0301400 | Plasmodium exported protein, unknown function                                                         | 0.23  | 12.76   | 16.96  |
| PF3D7_0301500 | Plasmodium exported protein, unknown function                                                         | -2.30 | 72.91   | 16.66  |
| PF3D7_0301600 | Plasmodium exported protein (hyp1), unknown function (GEXP21)                                         | -1.59 | 255.74  | 95.96  |
| PF3D7_0301700 | Plasmodium exported protein, unknown function                                                         | 0.78  | 49.05   | 94.94  |
| PF3D7_0301800 | Plasmodium exported protein, unknown function                                                         | -0.38 | 348.29  | 301.37 |
| PF3D7_0301900 | conserved Plasmodium protein, unknown function                                                        | -0.25 | 1.89    | 1.79   |
| PF3D7_0302000 | pre-mRNA-splicing factor PRP46, putative (PRP46)                                                      | -0.77 | 74.84   | 49.65  |
| PF3D7_0302100 | serine/threonine protein kinase (SRPK1)                                                               | -0.92 | 98.92   | 59.25  |
| PF3D7_0302200 | cytoadherence linked asexual protein 3.2 (CLAG3.2)                                                    | 0.18  | 214.74  | 274.72 |
| PF3D7_0302300 | erythrocyte membrane protein 1 (PfEMP1), pseudogene                                                   | 0.50  | 81.93   | 131.05 |
| PF3D7_0302400 | unspecified product                                                                                   | -0.28 | 1.11    | 1.03   |
| PF3D7_0302500 | cytoadherence linked asexual protein 3.1 (CLAG3.1)                                                    | -0.03 | 508.66  | 561.21 |
| PF3D7_0302600 | ABC transporter B family member 4, putative (ABCB4)                                                   | 0.58  | 4.51    | 7.65   |
| PF3D7_0302700 | CDGSH iron-sulfur domain-containing protein, putative                                                 | 0.64  | 7.81    | 13.76  |
| PF3D7_0302800 | conserved Plasmodium protein, unknown function                                                        | -1.71 | 68.82   | 23.74  |
| PF3D7_0302900 | exportin-1, putative                                                                                  | -0.81 | 112.90  | 72.94  |
| PF3D7_0303000 | N-ethylmaleimide-sensitive fusion protein (NSF)                                                       | -1.66 | 26.48   | 9.48   |
| PF3D7_0303100 | conserved Plasmodium protein, unknown function                                                        | 0.14  | 9.11    | 11.35  |
| PF3D7_0303200 | HAD superfamily protein, putative                                                                     | 1.92  | 51.26   | 218.44 |
| PF3D7_0303300 | DNA-directed RNA polymerase subunit I, putative                                                       | -0.83 | 177.60  | 113.10 |
| PF3D7_0303400 | palmitoyltransferase (DHHC1)                                                                          | -0.05 | 15.41   | 16.77  |
| PF3D7_0303500 | spindle pole body protein, putative                                                                   | 0.61  | 4.75    | 8.17   |
| PF3D7_0303600 | plasmoredoxin (Plrx)                                                                                  | -0.89 | 8.96    | 5.45   |
| PF3D7_0303700 | lipamide acyltransferase component of branched-chain alpha-keto acid dehydrogenase complex (BCKDH-E2) | 1.00  | 22.03   | 49.96  |
| PF3D7_0303800 | IBR domain protein, putative                                                                          | 0.93  | 5.33    | 11.47  |
| PF3D7_0303900 | phosphatidylethanolamine-binding protein, putative                                                    | 1.93  | 3.21    | 13.88  |
| PF3D7_0304000 | inner membrane complex protein 1a, putative (IMC1a)                                                   | 2.29  | 0.97    | 5.38   |
| PF3D7_0304100 | inner membrane complex protein 1e, putative (IMC1e)                                                   | 1.96  | 24.86   | 109.01 |
| PF3D7_0304200 | EH (Eps15 homology) protein (PAST1)                                                                   | -0.74 | 64.03   | 43.38  |
| PF3D7_0304300 | conserved Plasmodium protein, unknown function                                                        | -0.01 | 2.52    | 2.83   |
| PF3D7_0304400 | 60S ribosomal protein L44 (RPL44)                                                                     | -0.46 | 566.82  | 466.96 |
| PF3D7_0304500 | 1-cys-glutaredoxin-like protein-1 (GLP1)                                                              | 1.57  | 4.91    | 16.54  |
| PF3D7_0304600 | circumsporozoite (CS) protein (CSP)                                                                   | 1.54  | 4.69    | 15.41  |
| PF3D7_0304700 | conserved Plasmodium protein, unknown function                                                        | 1.44  | 0.35    | 1.10   |
| PF3D7_0304800 | conserved Plasmodium membrane protein, unknown function                                               | 0.14  | 0.98    | 1.22   |
| PF3D7_0304900 | conserved Plasmodium protein, unknown function                                                        | -1.02 | 59.78   | 33.32  |
| PF3D7_0305000 | elongation factor Ts (EF-Ts)                                                                          | -0.13 | 30.63   | 31.67  |
| PF3D7_0305100 | conserved Plasmodium protein, unknown function                                                        | 1.14  | 4.10    | 10.19  |
| PF3D7_0305200 | conserved Plasmodium protein, unknown function                                                        | -0.34 | 66.34   | 59.28  |
| PF3D7_0305300 | conserved Plasmodium membrane protein, unknown function                                               | -1.30 | 156.55  | 71.59  |
| PF3D7_0305400 | conserved Plasmodium protein, unknown function                                                        | 0.48  | 11.35   | 17.89  |
| PF3D7_0305500 | conserved Plasmodium protein, unknown function                                                        | -0.45 | 64.86   | 53.54  |
| PF3D7_0305600 | AP endonuclease (DNA-[apurinic or apyrimidinic site] lyase), putative                                 | 0.49  | 42.44   | 67.15  |
| PF3D7_0305700 | ubiquitin-conjugating enzyme E2, putative                                                             | -0.17 | 193.35  | 194.63 |
| PF3D7_0305800 | P-loop containing nucleoside triphosphate hydrolase, putative                                         | 1.40  | 1.45    | 4.35   |
| PF3D7_0305900 | conserved Plasmodium protein, unknown function                                                        | 0.21  | 4.32    | 5.66   |
| PF3D7_0306000 | conserved Plasmodium protein, unknown function                                                        | 0.81  | 29.43   | 58.28  |
| PF3D7_0306100 | conserved Plasmodium protein, unknown function                                                        | -1.33 | 51.20   | 23.05  |
| PF3D7_0306200 | activator of Hsp90 ATPase (AHA1)                                                                      | -1.06 | 33.30   | 18.02  |
| PF3D7_0306300 | glutaredoxin 1 (GRX1)                                                                                 | 0.20  | 86.67   | 112.71 |
| PF3D7_0306400 | FAD-dependent glycerol-3-phosphate dehydrogenase, putative                                            | 0.41  | 34.03   | 51.03  |
| PF3D7_0306500 | conserved Plasmodium protein, unknown function                                                        | 0.16  | 28.62   | 36.01  |
| PF3D7_0306600 | conserved Plasmodium protein, unknown function                                                        | -0.45 | 30.99   | 25.61  |
| PF3D7_0306700 | membrane magnesium transporter, putative                                                              | -0.72 | 31.27   | 21.43  |
| PF3D7_0306800 | T-complex protein 1 subunit beta (CCT2)                                                               | -1.48 | 248.06  | 100.65 |
| PF3D7_0306900 | 40S ribosomal protein S23, putative                                                                   | -0.94 | 1316.36 | 776.94 |
| PF3D7_0307000 | small nucleolar RNA snoR03                                                                            | -1.88 | 2.24    | 0.61   |
| PF3D7_0307100 | 40S ribosomal protein S12, putative                                                                   | -0.81 | 778.57  | 502.59 |
| PF3D7_0307200 | 60S ribosomal protein L7, putative                                                                    | -1.12 | 1796.52 | 930.38 |
| PF3D7_0307300 | EB1 homolog, putative                                                                                 | 1.58  | 1.34    | 4.56   |
| PF3D7_0307400 | ATP-dependent Clp protease proteolytic subunit (ClpP)                                                 | 0.88  | 14.45   | 30.14  |
| PF3D7_0307500 | conserved protein, unknown function                                                                   | 0.20  | 7.06    | 9.16   |
| PF3D7_0307600 | conserved Plasmodium protein, unknown function                                                        | 0.84  | 7.36    | 14.93  |
| PF3D7_0307700 | conserved Plasmodium protein, unknown function                                                        | 1.10  | 33.94   | 82.42  |
| PF3D7_0307800 | conserved Plasmodium protein, unknown function                                                        | -0.73 | 62.55   | 42.60  |
| PF3D7_0307900 | conserved Plasmodium protein, unknown function                                                        | 1.60  | 0.47    | 1.60   |
| PF3D7_0308000 | DNA polymerase epsilon subunit b, putative                                                            | 1.15  | 4.07    | 10.22  |
| PF3D7_0308100 | conserved Plasmodium protein, unknown function                                                        | 0.57  | 18.78   | 31.48  |
| PF3D7_0308200 | T-complex protein 1 subunit eta (CCT7)                                                                | -0.69 | 221.48  | 155.11 |
| PF3D7_0308300 | conserved Plasmodium protein, unknown function                                                        | 1.80  | 10.96   | 43.21  |
| PF3D7_0308400 | U4 spliceosomal RNA                                                                                   | 3.56  | 2.64    | 37.51  |
| PF3D7_0308500 | activator of Hsp90 ATPase, putative                                                                   | 2.23  | 22.61   | 119.98 |
| PF3D7_0308600 | pre-mRNA-processing factor 19, putative (PRPF19)                                                      | -0.52 | 131.81  | 103.95 |
| PF3D7_0308700 | conserved Plasmodium protein, unknown function                                                        | 1.94  | 15.40   | 66.98  |
| PF3D7_0308800 | conserved protein, unknown function                                                                   | 1.56  | 16.65   | 55.67  |
| PF3D7_0308900 | splicing factor 3B subunit 1, putative (SF3B1)                                                        | -1.00 | 65.84   | 37.16  |
| PF3D7_0309000 | dual specificity protein phosphatase (YVH1)                                                           | -1.28 | 41.26   | 19.20  |

|                 |                                                                                    |       |         |        |
|-----------------|------------------------------------------------------------------------------------|-------|---------|--------|
| PF3D7_0309100   | conserved Plasmodium protein, unknown function                                     | 0.08  | 2.21    | 2.65   |
| PF3D7_0309200   | serine/threonine protein kinase, putative (ARK2)                                   | 0.40  | 23.65   | 35.14  |
| PF3D7_0309300   | N2227-like protein, putative                                                       | -1.30 | 57.51   | 26.39  |
| PF3D7_0309400   | small nucleolar RNA Me18S-Um1356                                                   | -1.38 | 0.94    | 0.33   |
| PF3D7_0309500   | asparagine synthetase, putative                                                    | -0.86 | 405.14  | 252.85 |
| PF3D7_0309600   | 60S acidic ribosomal protein P2 (PF2)                                              | -0.15 | 880.99  | 898.40 |
| PF3D7_0309700   | SECIS-binding protein 2, putative (SBP2)                                           | -0.55 | 17.18   | 13.24  |
| PF3D7_0309800   | YTH domain-containing protein, putative                                            | -1.23 | 105.91  | 50.96  |
| PF3D7_0309900   | conserved Plasmodium protein, unknown function                                     | 0.31  | 2.15    | 3.01   |
| PF3D7_0310000   | 50S ribosomal protein L9, apicoplast, putative                                     | 0.36  | 10.26   | 14.86  |
| PF3D7_0310100   | calcium-dependent protein kinase 3 (CDPK3)                                         | 1.02  | 1.70    | 3.90   |
| PF3D7_0310200   | phd finger protein, putative                                                       | -0.25 | 146.76  | 138.96 |
| PF3D7_0310300   | phosphoglycerate mutase, putative                                                  | -1.17 | 74.99   | 37.53  |
| PF3D7_0310400   | parasite-infected erythrocyte surface protein (PIESP1)                             | 0.26  | 61.46   | 83.40  |
| PF3D7_0310500   | DEAD box helicase, putative                                                        | -0.82 | 37.12   | 23.79  |
| PF3D7_0310600.1 | eukaryotic translation initiation factor 3 subunit K, putative (EIF3K)             | -2.01 | 88.62   | 24.89  |
| PF3D7_0310600.2 | unspecified product (EIF3K)                                                        | -2.00 | 88.87   | 24.99  |
| PF3D7_0310700   | trafficking protein particle complex subunit 4, putative                           | -0.82 | 155.16  | 98.96  |
| PF3D7_0310800   | conserved Plasmodium protein, unknown function                                     | -0.87 | 178.38  | 110.09 |
| PF3D7_0310900   | conserved Plasmodium protein, unknown function                                     | -0.12 | 14.67   | 15.22  |
| PF3D7_0311000   | conserved Plasmodium protein, unknown function                                     | 0.15  | 0.29    | 0.38   |
| PF3D7_0311100   | pre-mRNA splicing factor, putative                                                 | -0.26 | 65.00   | 61.22  |
| PF3D7_0311200   | valine--tRNA ligase, putative                                                      | -0.22 | 8.13    | 7.87   |
| PF3D7_0311300   | phosphatidylinositol 3- and 4-kinase, putative                                     | 0.75  | 34.74   | 66.00  |
| PF3D7_0311400   | protein kinase, putative                                                           | 2.39  | 1.28    | 7.59   |
| PF3D7_0311500   | conserved Plasmodium protein, unknown function                                     | -1.41 | 125.66  | 53.32  |
| PF3D7_0311600   | dolichyl-diphosphooligosaccharide--protein glycosyltransferase subunit 1, putative | 0.76  | 8.11    | 15.54  |
| PF3D7_0311700   | plasmepsin VI                                                                      | 1.40  | 1.29    | 3.89   |
| PF3D7_0311800   | conserved protein, unknown function                                                | 0.60  | 18.27   | 31.38  |
| PF3D7_0311900   | conserved Plasmodium protein, unknown function                                     | 0.46  | 3.06    | 4.76   |
| PF3D7_0312000   | conserved Plasmodium protein, unknown function                                     | 1.08  | 3.05    | 7.35   |
| PF3D7_0312100   | E3 ubiquitin-protein ligase, putative                                              | 0.02  | 9.74    | 11.12  |
| PF3D7_0312200   | TPR domain containing protein                                                      | 0.99  | 3.56    | 7.99   |
| PF3D7_0312300   | 26S proteasome regulatory subunit RPN12, putative (RPN12)                          | -0.47 | 45.14   | 36.89  |
| PF3D7_0312400   | glycogen synthase kinase 3 (GSK3)                                                  | 1.57  | 55.55   | 186.27 |
| PF3D7_0312500   | transporter, putative                                                              | -0.72 | 19.16   | 13.15  |
| PF3D7_0312600   | tRNA Valine                                                                        | 2.40  | 1.75    | 11.90  |
| PF3D7_0312700   | tRNA Isoleucine                                                                    | -0.38 | 0.00    | 0.00   |
| PF3D7_0312800   | 60S ribosomal protein L26, putative                                                | -1.38 | 1198.23 | 521.07 |
| PF3D7_0312900   | hypothetical protein                                                               | -1.29 | 13.60   | 6.28   |
| PF3D7_0313000   | conserved Plasmodium protein, unknown function                                     | -1.85 | 50.97   | 16.01  |
| PF3D7_0313100   | ubiquitin-protein ligase, putative (HRD3)                                          | 0.17  | 25.93   | 32.86  |
| PF3D7_0313200   | conserved Plasmodium protein, unknown function                                     | -0.19 | 15.06   | 14.91  |
| PF3D7_0313300   | apicoplast conserved yef19 protein precursor, unknown function                     | -0.27 | 6.95    | 6.50   |
| PF3D7_0313400   | conserved Plasmodium protein, unknown function                                     | -1.18 | 17.17   | 8.54   |
| PF3D7_0313500   | GTP-binding protein EngA, putative                                                 | -1.64 | 17.67   | 6.41   |
| PF3D7_0313600   | conserved Plasmodium protein, unknown function                                     | 1.60  | 7.30    | 24.98  |
| PF3D7_0313700.1 | conserved Plasmodium protein, unknown function                                     | 0.56  | 7.62    | 12.74  |
| PF3D7_0313700.2 | conserved Plasmodium protein, unknown function                                     | 0.56  | 7.47    | 12.42  |
| PF3D7_0313800   | conserved Plasmodium protein, unknown function                                     | 0.39  | 8.13    | 12.08  |
| PF3D7_0313900   | conserved Plasmodium protein, unknown function                                     | 0.36  | 0.71    | 1.04   |
| PF3D7_0314000   | co-chaperone p23 (P23)                                                             | 0.46  | 18.72   | 29.07  |
| PF3D7_0314100.1 | vesicle transport v-SNARE protein, putative                                        | 0.94  | 44.31   | 96.18  |
| PF3D7_0314100.2 | vesicle transport v-SNARE protein, putative                                        | -0.06 | 2.94    | 3.20   |
| PF3D7_0314200   | conserved Plasmodium protein, unknown function                                     | 0.23  | 3.32    | 4.40   |
| PF3D7_0314300   | DER1-like protein (Der1-2)                                                         | -0.09 | 2.92    | 3.10   |
| PF3D7_0314400   | serine/threonine protein phosphatase 6, putative (PPP6)                            | -2.08 | 79.30   | 21.21  |
| PF3D7_0314500   | conserved Plasmodium protein, unknown function                                     | -2.19 | 126.33  | 31.31  |
| PF3D7_0314600   | conserved Plasmodium protein, unknown function                                     | -0.45 | 48.81   | 40.31  |
| PF3D7_0314700   | zinc finger protein, putative                                                      | 1.54  | 6.74    | 22.12  |
| PF3D7_0314800   | conserved Plasmodium protein, unknown function                                     | 0.25  | 2.85    | 3.83   |
| PF3D7_0314900   | conserved Plasmodium membrane protein, unknown function                            | 0.34  | 8.91    | 12.74  |
| PF3D7_0315000   | zinc finger protein, putative                                                      | 0.74  | 4.76    | 8.99   |
| PF3D7_0315100   | eukaryotic translation initiation factor 4E (eIF4E)                                | -1.75 | 227.83  | 76.68  |
| PF3D7_0315200   | circumsporozoite- and TRAP-related protein (CTRP)                                  | 1.62  | 3.95    | 13.68  |
| PF3D7_0315300   | conserved Plasmodium protein, unknown function                                     | 1.15  | 1.19    | 2.99   |
| PF3D7_0315400   | conserved Plasmodium protein, unknown function                                     | 0.46  | 14.18   | 22.12  |
| PF3D7_0315500   | mitochondrial ribosomal protein L29/L47 precursor, putative                        | 0.27  | 15.80   | 21.47  |
| PF3D7_0315600   | conserved Plasmodium protein, unknown function                                     | 1.30  | 5.05    | 14.09  |
| PF3D7_0315700   | conserved Plasmodium membrane protein, unknown function                            | -1.06 | 1.92    | 1.04   |
| PF3D7_0315800   | zinc finger protein, putative                                                      | -1.41 | 63.04   | 26.77  |
| PF3D7_0315900   | conserved Plasmodium protein, unknown function                                     | 0.81  | 3.63    | 7.22   |
| PF3D7_0316000   | miconeme associated antigen (MA)                                                   | 3.24  | 5.04    | 54.17  |
| PF3D7_0316100   | mitochondrial ribosomal protein L27 precursor, putative                            | 2.43  | 11.44   | 69.97  |
| PF3D7_0316200   | conserved Plasmodium protein, unknown function                                     | 0.63  | 4.76    | 8.32   |
| PF3D7_0316300.1 | inorganic pyrophosphatase, putative                                                | 0.84  | 70.39   | 142.50 |
| PF3D7_0316300.2 | inorganic pyrophosphatase, putative                                                | 0.80  | 66.25   | 129.92 |
| PF3D7_0316400   | conserved Plasmodium protein, unknown function                                     | 0.72  | 11.60   | 21.54  |
| PF3D7_0316500   | kinetochore protein NUF2, putative (NUF2)                                          | 0.14  | 19.02   | 23.70  |
| PF3D7_0316600   | formate-nitrite transporter (FNT)                                                  | -1.26 | 520.64  | 246.10 |
| PF3D7_0316700   | HVA22/TB2/DP1 family protein, putative                                             | -0.89 | 57.41   | 34.97  |
| PF3D7_0316800   | 40S ribosomal protein S15A, putative                                               | -0.82 | 1006.67 | 644.57 |
| PF3D7_0316900   | E3 ubiquitin-protein ligase, putative                                              | -0.25 | 67.85   | 64.58  |
| PF3D7_0317000   | proteasome subunit alpha type-3, putative                                          | -0.55 | 159.48  | 122.64 |
| PF3D7_0317100   | 6-cysteine protein (B9)                                                            | -0.03 | 2.43    | 2.69   |
| PF3D7_0317200   | cdc2-related protein kinase 4 (CRK4)                                               | 0.67  | 74.31   | 133.48 |
| PF3D7_0317300   | conserved Plasmodium protein, unknown function                                     | -0.39 | 77.82   | 66.92  |
| PF3D7_0317400   | conserved Plasmodium protein, unknown function                                     | -1.06 | 10.90   | 5.91   |
| PF3D7_0317500   | kinesin-5 (EG5)                                                                    | -1.09 | 63.16   | 33.55  |
| PF3D7_0317600   | 40S ribosomal protein S11, putative (RPS11)                                        | -1.16 | 1222.53 | 618.44 |
| PF3D7_0317700   | CPSF (cleavage and polyadenylation specific factor), subunit A, putative           | -1.03 | 43.34   | 23.96  |
| PF3D7_0317800   | proteasome regulatory protein, putative                                            | -1.05 | 63.00   | 34.24  |
| PF3D7_0317900   | conserved Plasmodium protein, unknown function                                     | -0.57 | 5.54    | 4.23   |
| PF3D7_0318000   | conserved Plasmodium protein, unknown function                                     | -1.62 | 1.36    | 0.48   |
| PF3D7_0318100   | stomatin-like protein                                                              | 0.61  | 11.29   | 19.54  |
| PF3D7_0318200   | DNA-directed RNA polymerase II subunit RPB1 (RPB1)                                 | -1.40 | 264.47  | 113.07 |
| PF3D7_0318300   | conserved Plasmodium protein, unknown function                                     | -1.63 | 103.25  | 37.73  |
| PF3D7_0318400   | conserved Plasmodium protein, unknown function                                     | 1.50  | 0.85    | 2.73   |



|                 |                                                                                                    |       |         |         |
|-----------------|----------------------------------------------------------------------------------------------------|-------|---------|---------|
| PF3D7_0318500   | conserved Plasmodium protein, unknown function                                                     | 1.18  | 8.46    | 21.67   |
| PF3D7_0318600   | cleavage and polyadenylation specificity factor, putative                                          | -0.16 | 51.50   | 52.10   |
| PF3D7_0318700   | trophozoite stage antigen                                                                          | 4.79  | 4.42    | 139.90  |
| PF3D7_0318800   | triosephosphate isomerase, putative                                                                | 1.99  | 1.44    | 6.51    |
| PF3D7_0318900   | conserved protein, unknown function                                                                | -0.28 | 57.24   | 53.27   |
| PF3D7_0319000   | P-type ATPase, putative (ATPase7)                                                                  | 0.15  | 25.77   | 32.22   |
| PF3D7_0319100   | E3 ubiquitin-protein ligase RBX1, putative (RBX1)                                                  | 0.23  | 54.13   | 71.52   |
| PF3D7_0319200   | endonuclease/exonuclease/phosphatase family protein, putative                                      | -1.26 | 28.30   | 13.36   |
| PF3D7_0319300   | ubiquitin-conjugating enzyme, putative                                                             | -1.21 | 50.78   | 24.86   |
| PF3D7_0319400   | kinesin-8, putative                                                                                | 0.84  | 9.17    | 18.52   |
| PF3D7_0319500   | RNA-binding protein, putative                                                                      | -0.70 | 146.32  | 102.00  |
| PF3D7_0319600   | elongation factor 1 (EF-1), putative                                                               | -1.08 | 225.61  | 120.79  |
| PF3D7_0319700   | ABC transporter 1 family member 1, putative (ABC13)                                                | -0.79 | 56.48   | 36.94   |
| PF3D7_0319800   | conserved Plasmodium protein, unknown function                                                     | -0.62 | 2.97    | 2.17    |
| PF3D7_0319900   | conserved Plasmodium protein, unknown function                                                     | -2.07 | 59.31   | 15.96   |
| PF3D7_0320000   | protein phosphatase inhibitor 2 (I2)                                                               | 1.02  | 32.44   | 74.42   |
| PF3D7_0320100   | protein transport protein SEC22 (SEC22)                                                            | -0.55 | 32.52   | 25.08   |
| PF3D7_0320200   | CPW-WPC family protein                                                                             | 0.24  | 1.21    | 1.62    |
| PF3D7_0320300   | T-complex protein 1 subunit epsilon (CCT5)                                                         | -0.77 | 199.97  | 132.01  |
| PF3D7_0320400   | oocyst capsule protein (Cap380)                                                                    | 2.36  | 0.34    | 1.96    |
| PF3D7_0320500   | nicotinamidase, putative (Nico)                                                                    | 1.08  | 32.42   | 77.36   |
| PF3D7_0320600   | conserved Plasmodium protein, unknown function                                                     | 0.85  | 5.05    | 10.36   |
| PF3D7_0320700   | signal peptidase complex subunit 2, putative (SPC2)                                                | 0.88  | 37.79   | 78.39   |
| PF3D7_0320800   | ATP-dependent RNA helicase DDX6 (DOZI)                                                             | 0.72  | 20.85   | 38.77   |
| PF3D7_0320900   | histone H2A variant, putative (H2A.Z)                                                              | -0.06 | 1271.24 | 1373.35 |
| PF3D7_0321000   | conserved Plasmodium protein, unknown function                                                     | -0.70 | 56.05   | 38.97   |
| PF3D7_0321100   | conserved Plasmodium protein, unknown function                                                     | 0.65  | 4.87    | 8.62    |
| PF3D7_0321200   | UDP-N-acetylglucosamine--dolichyl-phosphate N-acetylglucosaminophosphotransferase, putative (ALG7) | 0.51  | 5.50    | 8.86    |
| PF3D7_0321300   | conserved Plasmodium protein, unknown function                                                     | 0.48  | 2.08    | 3.29    |
| PF3D7_0321400   | protein kinase, putative                                                                           | 0.42  | 34.32   | 52.06   |
| PF3D7_0321500   | peptidase, putative                                                                                | 0.46  | 14.47   | 22.51   |
| PF3D7_0321600   | ATP-dependent RNA helicase, putative                                                               | 0.21  | 24.43   | 31.86   |
| PF3D7_0321700   | microtubule and actin binding protein, putative                                                    | 0.87  | 5.52    | 11.37   |
| PF3D7_0321800   | WD repeat-containing protein, putative                                                             | -0.69 | 64.48   | 45.07   |
| PF3D7_0321900   | cyclic amine resistance locus protein (CARL)                                                       | -0.80 | 65.43   | 42.50   |
| PF3D7_0322000   | peptidyl-prolyl cis-trans isomerase (CYP19A)                                                       | -0.65 | 1038.81 | 746.94  |
| PF3D7_0322100   | RNA triphosphatase (Prt1)                                                                          | -1.30 | 93.24   | 42.79   |
| PF3D7_0322200   | conserved Plasmodium protein, unknown function                                                     | 1.07  | 0.99    | 2.36    |
| PF3D7_0322300   | diacylglycerol O-acyltransferase (DGAT)                                                            | -0.01 | 22.88   | 25.58   |
| PF3D7_0322400   | regulator of initiation factor 2 (eIF2)                                                            | -1.79 | 54.21   | 17.67   |
| PF3D7_0322500   | iron-sulfur assembly protein, putative (IscA2)                                                     | 0.37  | 7.87    | 11.52   |
| PF3D7_0322600   | conserved Plasmodium protein, unknown function                                                     | 0.35  | 0.64    | 0.93    |
| PF3D7_0322700   | conserved Plasmodium protein, unknown function                                                     | -1.01 | 25.86   | 14.53   |
| PF3D7_0322800   | conserved Plasmodium protein, unknown function                                                     | -1.96 | 1.44    | 0.39    |
| PF3D7_0322900   | 40S ribosomal protein S3A, putative                                                                | -1.09 | 975.11  | 517.17  |
| PF3D7_0323000   | translation machinery-associated protein 7, putative (TMA7)                                        | -2.05 | 25.79   | 6.97    |
| PF3D7_0323100   | conserved Plasmodium protein, unknown function                                                     | -0.63 | 25.92   | 18.98   |
| PF3D7_0323200   | conserved Plasmodium protein, unknown function                                                     | -0.25 | 4.75    | 4.51    |
| PF3D7_0323300   | conserved protein, unknown function                                                                | 0.77  | 1.29    | 2.50    |
| PF3D7_0323400   | Rh5 interacting protein (RIPR)                                                                     | 3.65  | 15.42   | 218.54  |
| PF3D7_0323500   | survival motor neuron-like protein (SMN)                                                           | 0.70  | 61.72   | 113.43  |
| PF3D7_0323600   | conserved Plasmodium protein, unknown function                                                     | -0.92 | 14.00   | 8.37    |
| PF3D7_0323700   | U4/U6,U5 tri-snRNP-associated protein 1, putative (SART1)                                          | 0.49  | 48.94   | 77.91   |
| PF3D7_0323800   | conserved Plasmodium protein, unknown function                                                     | -2.22 | 62.66   | 15.19   |
| PF3D7_0323900   | erythrocyte membrane protein 1 (PFEMP1), exon 2, pseudogene (VAR)                                  | -1.28 | 3.31    | 1.54    |
| PF3D7_0324000   | exported protein family 1 (EPF1)                                                                   | -0.83 | 14.38   | 9.11    |
| PF3D7_0324100   | Pfmc-2TM Maurer's cleft two transmembrane protein (MC-2TM)                                         | -0.19 | 1.83    | 1.82    |
| PF3D7_0324200   | exported protein family 3 (EPF3)                                                                   | -2.87 | 93.06   | 14.40   |
| PF3D7_0324300   | exported protein family 4 (EPF4)                                                                   | -2.96 | 135.84  | 19.72   |
| PF3D7_0324400   | rifin (RIF)                                                                                        | -3.03 | 1.45    | 0.19    |
| PF3D7_0324500   | rifin (RIF)                                                                                        | -2.70 | 0.09    | 0.00    |
| PF3D7_0324600   | stevor                                                                                             | 0.40  | 0.15    | 0.24    |
| PF3D7_0324700   | erythrocyte membrane protein 1 (PFEMP1), exon 2, pseudogene (VAR)                                  | -1.08 | 1.33    | 0.71    |
| PF3D7_0324800   | rifin (RIF)                                                                                        | 0.12  | 1.85    | 2.27    |
| PF3D7_0324900   | erythrocyte membrane protein 1, PfEMP1 (VAR)                                                       | 0.90  | 5.57    | 11.76   |
| PF3D7_0400100   | erythrocyte membrane protein 1, PfEMP1 (VAR)                                                       | 1.11  | 6.25    | 15.25   |
| PF3D7_0400200   | erythrocyte membrane protein 1 (PFEMP1), exon 2, pseudogene                                        | 1.50  | 102.57  | 328.58  |
| PF3D7_0400300   | rifin (RIF)                                                                                        | 1.01  | 8.39    | 19.18   |
| PF3D7_0400400   | erythrocyte membrane protein 1, PfEMP1 (VAR)                                                       | -0.09 | 1.18    | 1.25    |
| PF3D7_0400500   | rifin (RIF)                                                                                        | 0.72  | 0.25    | 0.49    |
| PF3D7_0400600   | erythrocyte membrane protein 1 (PFEMP1), exon 1, pseudogene                                        | -0.38 | 0.00    | 0.00    |
| PF3D7_0400700   | rifin (RIF)                                                                                        | -0.64 | 0.45    | 0.32    |
| PF3D7_0400800   | stevor                                                                                             | -2.70 | 0.10    | 0.00    |
| PF3D7_0400900   | rifin (RIF)                                                                                        | 3.79  | 0.00    | 0.33    |
| PF3D7_0401000   | rifin (RIF)                                                                                        | -1.11 | 0.10    | 0.04    |
| PF3D7_0401100   | Plasmodium exported protein, unknown function, fragment                                            | -0.38 | 0.00    | 0.00    |
| PF3D7_0401200   | rifin (RIF)                                                                                        | -0.38 | 0.04    | 0.04    |
| PF3D7_0401300   | rifin (RIF)                                                                                        | 3.32  | 0.00    | 0.21    |
| PF3D7_0401400   | rifin (RIF)                                                                                        | 1.07  | 0.23    | 0.57    |
| PF3D7_0401500   | stevor, pseudogene                                                                                 | 3.17  | 0.19    | 2.17    |
| PF3D7_0401600.1 | rifin (RIF)                                                                                        | 0.01  | 146.63  | 166.71  |
| PF3D7_0401600.2 | PIR protein (RIF)                                                                                  | 0.01  | 146.92  | 166.89  |
| PF3D7_0401700   | Plasmodium exported protein, unknown function, pseudogene                                          | 2.17  | 3.50    | 17.79   |
| PF3D7_0401800   | Plasmodium exported protein (PHISTb), unknown function (PID80)                                     | 1.74  | 37.47   | 140.98  |
| PF3D7_0401900   | acyl-CoA synthetase (ACS6)                                                                         | -0.49 | 39.51   | 31.87   |
| PF3D7_0402000   | Plasmodium exported protein (PHISTa), unknown function                                             | 2.55  | 62.15   | 409.84  |
| PF3D7_0402100   | Plasmodium exported protein (PHISTb), unknown function                                             | 0.80  | 203.10  | 400.42  |
| PF3D7_0402200   | surface-associated interspersed protein 4.1 (SURFIN 4.1), pseudogene (SURF4.1)                     | 4.48  | 10.82   | 273.29  |
| PF3D7_0402300   | reticulocyte binding protein homologue 1 (RH1)                                                     | 5.41  | 4.07    | 196.10  |
| PF3D7_0402400   | Plasmodium exported protein, unknown function (GEXP18)                                             | -1.48 | 619.23  | 251.44  |
| PF3D7_0402500   | rifin, pseudogene (RIF)                                                                            | 2.51  | 0.09    | 0.71    |
| PF3D7_0402600   | stevor                                                                                             | 2.29  | 0.05    | 0.39    |
| PF3D7_0402700   | rifin, pseudogene (RIF)                                                                            | 1.39  | 0.09    | 0.31    |
| PF3D7_0402800   | erythrocyte membrane protein 1 (PFEMP1), pseudogene                                                | 0.01  | 0.16    | 0.18    |
| PF3D7_0402900   | probable protein, unknown function                                                                 | -0.39 | 5.75    | 4.94    |
| PF3D7_0403000   | tRNA Asparagine                                                                                    | -0.38 | 0.00    | 0.00    |
| PF3D7_0403100   | regulator of chromosome condensation, putative                                                     | 0.13  | 7.42    | 9.20    |
| PF3D7_0403200   | conserved Plasmodium protein, unknown function                                                     | -0.09 | 94.15   | 99.59   |

|                 |                                                                   |       |        |         |
|-----------------|-------------------------------------------------------------------|-------|--------|---------|
| PF3D7_0403300   | conserved Plasmodium protein, unknown function                    | -1.28 | 9.37   | 4.33    |
| PF3D7_0403400   | conserved Plasmodium protein, unknown function                    | -0.96 | 26.23  | 15.26   |
| PF3D7_0403500   | ubiquitin specific protease, putative                             | -0.28 | 15.25  | 14.18   |
| PF3D7_0403600   | conserved Plasmodium protein, unknown function                    | -0.25 | 15.50  | 14.72   |
| PF3D7_0403700   | CGI-201 protein, short form                                       | -0.76 | 88.55  | 59.19   |
| PF3D7_0403800   | alpha/beta hydrolase, putative                                    | 1.60  | 56.83  | 195.02  |
| PF3D7_0403900   | SET domain protein, putative (SET8)                               | 1.77  | 7.67   | 29.66   |
| PF3D7_0404000   | conserved Plasmodium protein, unknown function                    | 2.14  | 20.91  | 104.66  |
| PF3D7_0404100   | transcription factor with AP2 domain(s), putative (ApiAP2)        | 0.50  | 0.79   | 1.26    |
| PF3D7_0404200   | conserved Plasmodium protein, unknown function                    | -0.01 | 2.50   | 2.81    |
| PF3D7_0404300   | conserved Plasmodium protein, unknown function                    | -0.31 | 234.68 | 213.69  |
| PF3D7_0404400   | 6-cysteine protein (P36)                                          | -0.80 | 23.68  | 15.37   |
| PF3D7_0404500   | 6-cysteine protein (P52)                                          | -2.51 | 21.60  | 4.29    |
| PF3D7_0404600   | conserved Plasmodium membrane protein, unknown function           | -1.21 | 23.75  | 11.58   |
| PF3D7_0404700   | dipeptidyl aminopeptidase 3 (DPAP3)                               | 0.89  | 60.16  | 125.80  |
| PF3D7_0404800   | conserved Plasmodium protein, unknown function                    | 1.27  | 13.42  | 36.68   |
| PF3D7_0404900   | 6-cysteine protein (P41)                                          | 0.87  | 94.05  | 193.52  |
| PF3D7_0405000   | ATP-dependent RNA helicase, putative                              | -1.05 | 48.56  | 26.42   |
| PF3D7_0405100   | protein transport protein Sec24B (SEC24B)                         | -0.50 | 73.02  | 58.22   |
| PF3D7_0405200   | ag-1 blood stage membrane protein homologue (MAg-1)               | 0.73  | 60.98  | 114.10  |
| PF3D7_0405300   | 6-cysteine protein (LISP2)                                        | 0.02  | 2.01   | 2.30    |
| PF3D7_0405400   | pre-mRNA-processing-splicing factor 8, putative (PRPF8)           | -0.98 | 164.27 | 94.36   |
| PF3D7_0405500   | conserved Plasmodium protein, unknown function                    | -0.93 | 24.09  | 14.24   |
| PF3D7_0405600   | conserved Plasmodium membrane protein, unknown function           | -0.81 | 33.65  | 21.71   |
| PF3D7_0405700   | lysine decarboxylase, putative                                    | 1.15  | 4.68   | 11.73   |
| PF3D7_0405800   | conserved Plasmodium protein, unknown function                    | 1.03  | 9.28   | 21.51   |
| PF3D7_0405900   | apical sushi protein (ASP)                                        | 1.19  | 66.01  | 169.63  |
| PF3D7_0406000   | conserved Plasmodium protein, unknown function                    | -0.10 | 40.19  | 42.48   |
| PF3D7_0406100   | V-type proton ATPase subunit B                                    | -0.70 | 339.39 | 236.64  |
| PF3D7_0406200   | sexual stage-specific protein precursor (Pfs16)                   | 2.00  | 487.97 | 2208.08 |
| PF3D7_0406400   | cytosolic glyoxalase II (cGloII)                                  | -1.31 | 96.47  | 44.07   |
| PF3D7_0406500   | conserved Plasmodium protein, unknown function                    | -1.11 | 187.10 | 97.77   |
| PF3D7_0406600   | conserved Plasmodium protein, unknown function                    | 0.21  | 1.55   | 2.04    |
| PF3D7_0406700   | conserved Plasmodium protein, unknown function                    | 0.88  | 7.34   | 15.32   |
| PF3D7_0406800   | conserved Plasmodium protein, unknown function                    | 1.34  | 5.54   | 15.89   |
| PF3D7_0406900   | conserved Plasmodium protein, unknown function                    | -0.21 | 1.66   | 1.62    |
| PF3D7_0407000   | conserved Plasmodium protein, unknown function                    | -1.65 | 31.43  | 11.27   |
| PF3D7_0407100   | methyltransferase, putative                                       | -0.59 | 18.82  | 14.16   |
| PF3D7_0407200   | peptidyl-tRNA hydrolase 2, putative (PTH2)                        | -1.15 | 61.15  | 31.18   |
| PF3D7_0407300   | transcription factor, putative                                    | -1.84 | 88.95  | 27.97   |
| PF3D7_0407400   | conserved Plasmodium protein, unknown function                    | -0.09 | 5.80   | 6.18    |
| PF3D7_0407500   | mitochondrial carrier protein, putative                           | -1.26 | 14.64  | 6.89    |
| PF3D7_0407600   | conserved Plasmodium protein, unknown function                    | 1.95  | 0.18   | 0.83    |
| PF3D7_0407700   | conserved Plasmodium protein, unknown function                    | 1.14  | 18.81  | 46.97   |
| PF3D7_0407800   | conserved Plasmodium protein, unknown function                    | 1.14  | 48.48  | 120.45  |
| PF3D7_0407900   | AAA family ATPase, putative                                       | 3.67  | 19.68  | 282.49  |
| PF3D7_0408000   | conserved Plasmodium protein, unknown function                    | 3.32  | 18.23  | 205.97  |
| PF3D7_0408100   | conserved Plasmodium protein, unknown function                    | 0.09  | 24.06  | 28.83   |
| PF3D7_0408200   | conserved Plasmodium protein, unknown function                    | 0.21  | 9.91   | 12.99   |
| PF3D7_0408300   | zinc finger, RAN binding protein, putative                        | -1.10 | 86.03  | 45.44   |
| PF3D7_0408400   | conserved Plasmodium protein, unknown function                    | 0.33  | 4.48   | 6.35    |
| PF3D7_0408500   | flap endonuclease 1 (FEN1)                                        | 1.18  | 16.79  | 42.90   |
| PF3D7_0408600   | sporozoite invasion-associated protein 1 (SIAP1)                  | 0.97  | 4.89   | 10.86   |
| PF3D7_0408700   | sporozoite micronemal protein essential for cell traversal (PLP1) | 2.34  | 0.26   | 1.51    |
| PF3D7_0408800   | conserved Plasmodium protein, unknown function                    | 5.65  | 0.00   | 1.32    |
| PF3D7_0408900.1 | tRNA N6-adenosine threonylcarbamoyltransferase (KAE1)             | 1.64  | 6.44   | 22.76   |
| PF3D7_0408900.2 | tRNA N6-adenosine threonylcarbamoyltransferase (KAE1)             | 1.64  | 6.46   | 22.81   |
| PF3D7_0409000   | conserved Plasmodium protein, unknown function                    | 0.06  | 1.33   | 1.57    |
| PF3D7_0409100   | U4/U6 small nuclear ribonucleoprotein PRP31, putative (PRPF31)    | -0.27 | 110.60 | 103.31  |
| PF3D7_0409200   | protein SOF1, putative (SOF1)                                     | -0.42 | 113.48 | 95.72   |
| PF3D7_0409300   | conserved Plasmodium protein, unknown function                    | -0.82 | 21.87  | 14.02   |
| PF3D7_0409400   | heat shock protein 40 (DnaJ)                                      | -0.62 | 52.99  | 39.07   |
| PF3D7_0409500   | conserved Plasmodium protein, unknown function                    | 0.03  | 16.11  | 18.56   |
| PF3D7_0409600   | replication protein A1, large subunit (RPA1)                      | 0.66  | 26.65  | 47.72   |
| PF3D7_0409700   | peptide chain release factor 2, putative                          | 1.04  | 7.35   | 17.12   |
| PF3D7_0409800   | zinc finger protein, putative                                     | -0.64 | 148.71 | 107.75  |
| PF3D7_0409900   | actin-like protein, putative (ALP5b)                              | 0.01  | 12.34  | 14.05   |
| PF3D7_0410000   | erythrocyte vesicle protein 1 (EVP1)                              | 0.19  | 223.84 | 288.59  |
| PF3D7_0410100   | tRNA Serine                                                       | -0.38 | 0.00   | 0.00    |
| PF3D7_0410200   | tRNA Isoleucine                                                   | -2.70 | 1.23   | 0.00    |
| PF3D7_0410300   | protein phosphatase PPM1, putative (PPM1)                         | -1.12 | 41.33  | 21.42   |
| PF3D7_0410400   | exosome complex component RRP4, putative (RRP4)                   | -1.54 | 50.26  | 19.57   |
| PF3D7_0410500   | conserved Plasmodium protein, unknown function                    | 0.81  | 4.08   | 8.14    |
| PF3D7_0410600   | conserved Plasmodium protein, unknown function                    | 0.32  | 53.50  | 75.68   |
| PF3D7_0410700   | ribosome biogenesis GTPase A, putative (RbgA)                     | 1.69  | 39.54  | 143.70  |
| PF3D7_0410800   | conserved Plasmodium protein, unknown function                    | 0.69  | 61.46  | 111.64  |
| PF3D7_0410900   | conserved Plasmodium protein, unknown function                    | -1.22 | 38.58  | 18.75   |
| PF3D7_0411000   | conserved Plasmodium protein, unknown function                    | -2.51 | 139.80 | 27.65   |
| PF3D7_0411100   | conserved Plasmodium protein, unknown function                    | 0.93  | 6.85   | 14.82   |
| PF3D7_0411200   | conserved Plasmodium protein, unknown function                    | 1.05  | 3.30   | 7.73    |
| PF3D7_0411300   | conserved Plasmodium protein, unknown function                    | 0.39  | 4.14   | 6.12    |
| PF3D7_0411400   | DEAD box ATP-dependent RNA helicase, putative                     | -1.17 | 10.94  | 5.50    |
| PF3D7_0411500   | tRNA Alanine                                                      | -1.96 | 0.62   | 0.00    |
| PF3D7_0411600   | tRNA Glutamic acid                                                | 2.08  | 0.31   | 2.71    |
| PF3D7_0411700   | conserved Plasmodium protein, unknown function                    | 0.04  | 0.27   | 0.33    |
| PF3D7_0411800   | conserved Plasmodium protein, unknown function                    | 0.72  | 6.89   | 12.82   |
| PF3D7_0411900   | DNA polymerase alpha                                              | 0.84  | 12.52  | 25.37   |
| PF3D7_0412000   | conserved Plasmodium protein, unknown function                    | 0.81  | 13.84  | 27.47   |
| PF3D7_0412100   | mitochondrial ribosomal protein S12 precursor, putative           | -0.12 | 8.33   | 8.68    |
| PF3D7_0412200   | conserved Plasmodium protein, unknown function                    | -1.58 | 5.72   | 2.15    |
| PF3D7_0412300   | phosphopantothenoylcysteine synthetase, putative                  | -0.72 | 3.86   | 2.64    |
| PF3D7_0412400   | erythrocyte membrane protein 1, PfEMP1 (VAR)                      | -0.42 | 8.43   | 7.10    |
| PF3D7_0412500   | Plasmodium RNA of unknown function RUF6-3                         | -0.05 | 0.44   | 0.51    |
| PF3D7_0412600   | rifin, pseudogene (RIF)                                           | 2.62  | 0.00   | 0.13    |
| PF3D7_0412700   | erythrocyte membrane protein 1, PfEMP1 (VAR)                      | -1.97 | 5.49   | 1.59    |
| PF3D7_0412800   | Plasmodium RNA of unknown function                                | -3.44 | 3.87   | 0.28    |
| PF3D7_0412900   | erythrocyte membrane protein 1, PfEMP1 (VAR)                      | -1.52 | 5.40   | 2.12    |
| PF3D7_0413000   | Plasmodium RNA of unknown function RUF6-8                         | -2.96 | 1.77   | 0.14    |

|                 |                                                                        |       |         |         |
|-----------------|------------------------------------------------------------------------|-------|---------|---------|
| PF3D7_0413100   | erythrocyte membrane protein 1, PfEMP1 (VAR)                           | -1.22 | 3.84    | 1.86    |
| PF3D7_0413200   | rifin (RIF)                                                            | 2.79  | 0.00    | 0.14    |
| PF3D7_0413300   | rifin (RIF)                                                            | 1.25  | 0.24    | 0.67    |
| PF3D7_0413400   | erythrocyte membrane protein 1 (PfEMP1), exon 1, pseudogene (VAR)      | 0.95  | 1.11    | 2.44    |
| PF3D7_0413500   | phosphoglucomutase-2 (PGM2)                                            | 0.58  | 43.69   | 73.64   |
| PF3D7_0413600   | 26S protease regulatory subunit 6B, putative (RPT3)                    | -0.20 | 199.79  | 196.85  |
| PF3D7_0413700   | lysine decarboxylase-like protein, putative                            | 0.44  | 38.28   | 58.51   |
| PF3D7_0413800   | 50S ribosomal protein L10, putative                                    | -0.27 | 4.68    | 4.37    |
| PF3D7_0413900   | ubiquitin carboxyl-terminal hydrolase 13, putative (USP13)             | -0.28 | 49.53   | 46.19   |
| PF3D7_0414000   | chromosome associated protein, putative                                | 0.96  | 14.40   | 31.69   |
| PF3D7_0414100   | conserved Plasmodium membrane protein, unknown function                | 0.81  | 1.19    | 2.37    |
| PF3D7_0414200.1 | calmodulin-like protein                                                | -0.16 | 6.72    | 6.80    |
| PF3D7_0414200.2 | calmodulin-like protein                                                | -0.19 | 6.63    | 6.58    |
| PF3D7_0414300   | Rab5-interacting protein, putative                                     | -1.35 | 26.36   | 11.67   |
| PF3D7_0414400   | conserved Plasmodium protein, unknown function                         | 1.14  | 0.14    | 0.37    |
| PF3D7_0414500   | RNA-binding protein, putative                                          | 1.35  | 2.54    | 7.35    |
| PF3D7_0414600   | conserved protein, unknown function                                    | 1.69  | 16.52   | 60.45   |
| PF3D7_0414700   | GTP-binding protein, putative                                          | 1.72  | 13.74   | 51.31   |
| PF3D7_0414800   | conserved Plasmodium protein, unknown function                         | 2.85  | 11.91   | 97.09   |
| PF3D7_0414900   | armadillo-domain containing rhoptyr protein (ARO)                      | 2.04  | 66.68   | 308.95  |
| PF3D7_0415000   | arsenical pump-driving ATPase, putative                                | -2.13 | 85.61   | 22.12   |
| PF3D7_0415100   | conserved Plasmodium protein, unknown function                         | -1.65 | 15.51   | 5.56    |
| PF3D7_0415200   | conserved Plasmodium protein, unknown function                         | 0.15  | 4.48    | 5.62    |
| PF3D7_0415300   | cdc2-related protein kinase 3 (CRK3)                                   | -0.99 | 104.10  | 59.30   |
| PF3D7_0415400   | coatamer subunit zeta, putative                                        | -1.33 | 130.50  | 58.78   |
| PF3D7_0415500   | nuclear cap-binding protein, putative                                  | -1.25 | 103.52  | 49.02   |
| PF3D7_0415600   | GTP:AMP phosphotransferase (GAK)                                       | 0.15  | 2.01    | 2.54    |
| PF3D7_0415700   | conserved Plasmodium protein, unknown function                         | 0.65  | 4.43    | 7.87    |
| PF3D7_0415800   | RING zinc finger protein, putative                                     | 2.85  | 3.02    | 24.71   |
| PF3D7_0415900   | 60S ribosomal protein L15, putative                                    | -1.14 | 2134.74 | 1090.61 |
| PF3D7_0416000   | RNA-binding protein, putative                                          | 0.26  | 40.59   | 54.81   |
| PF3D7_0416100   | glutamyl-tRNA(Gln) amidotransferase subunit A, putative                | 0.87  | 22.37   | 46.16   |
| PF3D7_0416200   | conserved protein, unknown function                                    | 0.62  | 53.31   | 92.36   |
| PF3D7_0416300   | DNA helicase MCM9, putative (MCM9)                                     | 0.36  | 12.24   | 17.70   |
| PF3D7_0416400   | histone acetyltransferase, putative (HAT1)                             | 0.79  | 51.35   | 100.34  |
| PF3D7_0416500   | repressor of RNA polymerase III transcription MAF1, putative           | 0.82  | 8.69    | 17.32   |
| PF3D7_0416600   | prohibitin-like protein, putative                                      | 0.14  | 8.32    | 10.38   |
| PF3D7_0416700   | CDGSH iron-sulfur domain-containing protein, putative                  | -0.03 | 26.22   | 28.95   |
| PF3D7_0416800   | small GTP-binding protein sar1 (SAR1)                                  | -0.03 | 346.21  | 382.74  |
| PF3D7_0416900   | conserved Plasmodium protein, unknown function                         | -0.90 | 15.31   | 9.30    |
| PF3D7_0417000   | conserved Plasmodium protein, unknown function                         | 0.69  | 1.46    | 2.68    |
| PF3D7_0417100   | mRNA-binding protein PUF2 (PUF2)                                       | 1.92  | 0.19    | 0.86    |
| PF3D7_0417200   | bifunctional dihydrofolate reductase-thymidylate synthase (DHFR-TS)    | -0.07 | 22.69   | 24.40   |
| PF3D7_0417300   | LETM1-like protein, putative                                           | -0.41 | 39.98   | 33.92   |
| PF3D7_0417400   | conserved Plasmodium protein, unknown function                         | -0.63 | 37.98   | 27.68   |
| PF3D7_0417500   | memo-like protein                                                      | 1.07  | 20.04   | 47.64   |
| PF3D7_0417600   | conserved Plasmodium protein, unknown function                         | 1.13  | 2.95    | 7.32    |
| PF3D7_0417700   | conserved Plasmodium protein, unknown function                         | 0.33  | 2.27    | 3.22    |
| PF3D7_0417800   | cdc2-related protein kinase 1 (CRK1)                                   | 0.32  | 16.32   | 23.02   |
| PF3D7_0417900   | conserved Plasmodium protein, unknown function                         | -0.26 | 1.81    | 1.71    |
| PF3D7_0418000   | conserved Plasmodium protein, unknown function                         | 1.07  | 2.51    | 5.94    |
| PF3D7_0418100   | conserved Plasmodium protein, unknown function                         | -1.62 | 51.12   | 18.77   |
| PF3D7_0418200   | eukaryotic translation initiation factor 3 subunit M, putative (EIF3M) | -1.38 | 180.01  | 77.95   |
| PF3D7_0418300   | conserved Plasmodium protein, unknown function                         | -0.35 | 903.05  | 802.81  |
| PF3D7_0418400   | conserved Plasmodium protein, unknown function                         | -0.99 | 18.06   | 10.22   |
| PF3D7_0418500   | trafficking protein particle complex subunit 3, putative (BET3)        | -0.52 | 19.98   | 15.76   |
| PF3D7_0418600   | regulator of chromosome condensation, putative                         | 3.24  | 9.79    | 104.36  |
| PF3D7_0418700   | RNA-binding protein NOB1, putative                                     | -0.12 | 126.32  | 130.95  |
| PF3D7_0418800   | conserved Plasmodium protein, unknown function                         | -0.16 | 1.40    | 1.41    |
| PF3D7_0418900   | conserved Plasmodium protein, unknown function                         | 1.13  | 2.56    | 6.35    |
| PF3D7_0419000   | conserved Plasmodium protein, unknown function                         | 1.51  | 0.80    | 2.61    |
| PF3D7_0419100   | conserved Plasmodium protein, unknown function                         | 0.65  | 1.75    | 3.11    |
| PF3D7_0419200   | CGI-141 protein homolog, putative                                      | -1.11 | 17.66   | 9.20    |
| PF3D7_0419300   | conserved Plasmodium protein, unknown function                         | 0.25  | 11.71   | 15.75   |
| PF3D7_0419400   | conserved Plasmodium protein, unknown function                         | -0.83 | 13.66   | 8.70    |
| PF3D7_0419500   | conserved Plasmodium membrane protein, unknown function                | -1.11 | 34.76   | 18.17   |
| PF3D7_0419600   | ran binding protein 1, putative                                        | 0.10  | 577.48  | 699.90  |
| PF3D7_0419700   | apical merozoite protein (PE34)                                        | 0.40  | 44.94   | 67.04   |
| PF3D7_0419800   | 60S ribosomal protein L7ae/L30e, putative                              | -1.01 | 125.29  | 70.12   |
| PF3D7_0419900   | phosphatidylinositol 4-kinase, putative                                | -1.18 | 66.44   | 33.03   |
| PF3D7_0420000   | zinc finger protein, putative                                          | -0.40 | 70.44   | 60.22   |
| PF3D7_0420100   | serine/threonine protein kinase RIO2 (RIO2)                            | -0.56 | 86.03   | 66.04   |
| PF3D7_0420200   | holo-[acyl-carrier-protein] synthase, putative (ACPS)                  | 0.67  | 4.47    | 8.03    |
| PF3D7_0420300   | transcription factor with AP2 domain(s) (ApiAP2)                       | 2.19  | 73.11   | 376.01  |
| PF3D7_0420400   | ribosome-recycling factor (RRF2)                                       | 1.32  | 6.88    | 19.44   |
| PF3D7_0420500   | conserved Plasmodium protein, unknown function                         | 0.87  | 2.25    | 4.70    |
| PF3D7_0420600   | conserved Plasmodium protein, unknown function                         | 0.30  | 25.15   | 35.10   |
| PF3D7_0420700   | erythrocyte membrane protein 1, PfEMP1 (VAR)                           | 0.01  | 6.39    | 7.28    |
| PF3D7_0420800   | Plasmodium RNA of unknown function RUF6                                | -1.96 | 0.44    | 0.00    |
| PF3D7_0420900   | erythrocyte membrane protein 1, PfEMP1 (VAR)                           | -0.35 | 14.43   | 12.81   |
| PF3D7_0421000   | unspecified product                                                    | -1.38 | 0.22    | 0.00    |
| PF3D7_0421100   | erythrocyte membrane protein 1, PfEMP1 (VAR)                           | -0.51 | 9.83    | 7.82    |
| PF3D7_0421200   | rifin (RIF)                                                            | 0.33  | 0.45    | 0.66    |
| PF3D7_0421300   | erythrocyte membrane protein 1, PfEMP1 (VAR)                           | -0.26 | 2.70    | 2.55    |
| PF3D7_0421400   | Plasmodium RNA of unknown function RUF6-5                              | -0.38 | 0.00    | 0.00    |
| PF3D7_0421500   | rifin, pseudogene (RIF)                                                | 1.21  | 0.00    | 0.04    |
| PF3D7_0421600   | erythrocyte membrane protein 1 (PfEMP1)-like pseudogene (VAR)          | 1.62  | 0.03    | 0.17    |
| PF3D7_0421700   | conserved Plasmodium protein, unknown function                         | 6.24  | 0.02    | 2.30    |
| PF3D7_0421800   | conserved Plasmodium protein, unknown function                         | 0.85  | 0.18    | 0.46    |
| PF3D7_0421900   | conserved Plasmodium protein, unknown function                         | 2.79  | 0.21    | 2.35    |
| PF3D7_0422000   | steroid dehydrogenase, putative                                        | 1.11  | 11.94   | 29.11   |
| PF3D7_0422100   | transmembrane emp24 domain-containing protein, putative                | -1.12 | 59.98   | 31.12   |
| PF3D7_0422200   | erythrocyte membrane-associated antigen                                | -0.61 | 29.13   | 21.62   |
| PF3D7_0422300   | alpha tubulin 2                                                        | 0.43  | 112.36  | 171.24  |
| PF3D7_0422400   | 40S ribosomal protein S19 (RPS19)                                      | -0.86 | 1642.03 | 1020.22 |
| PF3D7_0422500   | pre-mRNA-splicing helicase BRR2, putative (BRR2)                       | -1.10 | 111.55  | 58.88   |
| PF3D7_0422600   | conserved Plasmodium protein, unknown function                         | -1.36 | 17.16   | 7.51    |
| PF3D7_0422700   | eukaryotic initiation factor, putative                                 | -0.82 | 101.95  | 65.03   |

|                 |                                                                               |       |         |         |
|-----------------|-------------------------------------------------------------------------------|-------|---------|---------|
| PF3D7_0422800   | serpentine receptor, putative (SR12)                                          | 0.84  | 4.55    | 9.24    |
| PF3D7_0422900   | conserved Plasmodium protein, unknown function                                | 2.33  | 2.95    | 16.84   |
| PF3D7_0423000   | conserved Plasmodium protein, unknown function                                | -0.51 | 21.06   | 16.75   |
| PF3D7_0423100   | AP-4 complex subunit sigma, putative                                          | -0.49 | 78.68   | 63.29   |
| PF3D7_0423200   | BSD-domain protein, putative                                                  | -0.75 | 51.78   | 34.86   |
| PF3D7_0423300   | conserved Plasmodium protein, unknown function                                | 1.00  | 20.77   | 46.83   |
| PF3D7_0423400   | asparagine-rich protein (AARP)                                                | 1.12  | 33.05   | 81.15   |
| PF3D7_0423500   | glideosome associated protein with multiple membrane spans 2 (GAPM2)          | 0.10  | 200.54  | 243.15  |
| PF3D7_0423600   | conserved Plasmodium protein, unknown function                                | -0.28 | 64.13   | 59.84   |
| PF3D7_0423700   | early transcribed membrane protein 4 (ETRAPM4)                                | 0.12  | 466.41  | 571.91  |
| PF3D7_0423800   | cysteine-rich protective antigen (CyRPA)                                      | 2.01  | 30.30   | 138.13  |
| PF3D7_0423900   | probable protein, unknown function                                            | 1.59  | 17.21   | 58.66   |
| PF3D7_0424000   | Plasmodium exported protein (PHISTc), unknown function                        | 1.59  | 5.88    | 19.98   |
| PF3D7_0424100   | reticulocyte binding protein homologue 5 (RHS)                                | 3.07  | 9.35    | 88.54   |
| PF3D7_0424200   | reticulocyte binding protein homologue 4 (RH4)                                | 4.87  | 4.09    | 134.70  |
| PF3D7_0424300   | erythrocyte binding antigen-165, pseudogene (EBA165)                          | 4.01  | 6.38    | 115.83  |
| PF3D7_0424400   | surface-associated interspersed protein 4.2 (SURFIN 4.2) (SURF4.2)            | 2.10  | 0.41    | 1.98    |
| PF3D7_0424500   | serine/threonine protein kinase, FIKK family (FIKK4.1)                        | -0.83 | 259.24  | 165.21  |
| PF3D7_0424600   | Plasmodium exported protein (PHISTb), unknown function                        | 0.27  | 475.52  | 646.49  |
| PF3D7_0424700   | serine/threonine protein kinase, FIKK family (FIKK4.2)                        | -0.88 | 315.98  | 194.58  |
| PF3D7_0424800   | Plasmodium exported protein (PHISTb), unknown function                        | -3.14 | 271.62  | 34.79   |
| PF3D7_0424900   | Plasmodium exported protein (PHISTa), unknown function                        | -3.51 | 1882.65 | 187.13  |
| PF3D7_0425000   | Plasmodium exported protein, unknown function, pseudogene                     | -1.43 | 0.55    | 0.22    |
| PF3D7_0425100   | Plasmodium exported protein (hyp6), unknown function                          | -2.37 | 152.19  | 33.18   |
| PF3D7_0425200   | Plasmodium exported protein (hyp15), unknown function                         | -2.32 | 114.65  | 25.85   |
| PF3D7_0425300   | Plasmodium exported protein (PHISTa), unknown function, pseudogene            | 0.11  | 0.13    | 0.17    |
| PF3D7_0425400   | Plasmodium exported protein (PHISTa), unknown function                        | -2.37 | 26.71   | 5.82    |
| PF3D7_0425500   | stevor                                                                        | 0.62  | 0.24    | 0.45    |
| PF3D7_0425600   | rifin, pseudogene (RIF)                                                       | 2.43  | 0.10    | 0.72    |
| PF3D7_0425700   | rifin (RIF)                                                                   | -2.18 | 0.30    | 0.06    |
| PF3D7_0425800   | erythrocyte membrane protein 1, PfEMP1 (VAR)                                  | -1.15 | 1.34    | 0.68    |
| PF3D7_0425900   | rifin (RIF)                                                                   | -1.62 | 1.77    | 0.64    |
| PF3D7_0426000   | erythrocyte membrane protein 1, PfEMP1 (VAR)                                  | -0.21 | 0.92    | 0.90    |
| PF3D7_0500100   | erythrocyte membrane protein 1, PfEMP1 (VAR)                                  | -0.77 | 3.36    | 2.22    |
| PF3D7_0500200   | erythrocyte membrane protein 1 (PfEMP1), pseudogene                           | -0.38 | 0.00    | 0.00    |
| PF3D7_0500300   | rifin, pseudogene (RIF)                                                       | 0.90  | 0.13    | 0.30    |
| PF3D7_0500400   | rifin (RIF)                                                                   | 0.70  | 0.16    | 0.31    |
| PF3D7_0500500   | rifin (RIF)                                                                   | 2.26  | 0.10    | 0.63    |
| PF3D7_0500600   | stevor, pseudogene                                                            | 2.11  | 0.39    | 1.98    |
| PF3D7_0500700   | rifin, pseudogene (RIF)                                                       | 4.21  | 0.00    | 1.63    |
| PF3D7_0500800   | mature parasite-infected erythrocyte surface antigen (MESA)                   | 1.50  | 254.43  | 810.73  |
| PF3D7_0500900   | serine/threonine protein kinase, FIKK family (FIKK5)                          | 0.15  | 9.53    | 11.95   |
| PF3D7_0501000   | Plasmodium exported protein, unknown function                                 | -0.55 | 353.45  | 272.34  |
| PF3D7_0501100.1 | heat shock protein 40, type II (HSP40)                                        | -0.69 | 484.70  | 339.45  |
| PF3D7_0501100.2 | heat shock protein 40, type II (HSP40)                                        | -0.71 | 484.70  | 335.47  |
| PF3D7_0501200   | parasite-infected erythrocyte surface protein (PIESP2)                        | 0.31  | 117.11  | 164.31  |
| PF3D7_0501300   | skeleton-binding protein 1 (SBP1)                                             | -1.23 | 6299.54 | 3038.51 |
| PF3D7_0501400   | interspersed repeat antigen (FIRA)                                            | -0.74 | 2618.12 | 1765.49 |
| PF3D7_0501500   | rho-try-associated protein 3 (RAP3)                                           | 0.61  | 94.59   | 163.17  |
| PF3D7_0501600   | rho-try-associated protein 2 (RAP2)                                           | 0.38  | 167.84  | 247.16  |
| PF3D7_0501700   | anaphase promoting complex subunit, putative                                  | 1.31  | 0.45    | 1.28    |
| PF3D7_0501800   | chromosome assembly factor 1 (CAF1)                                           | 1.04  | 23.77   | 55.32   |
| PF3D7_0501900   | conserved protein, unknown function                                           | -0.91 | 15.34   | 9.23    |
| PF3D7_0502000   | vacuolar protein sorting-associated protein 11, putative (VPS11)              | -1.29 | 35.81   | 16.59   |
| PF3D7_0502100   | HCNGP-like protein                                                            | -0.45 | 10.71   | 8.87    |
| PF3D7_0502200   | conserved Plasmodium membrane protein, unknown function                       | -0.04 | 19.44   | 21.39   |
| PF3D7_0502300   | conserved Plasmodium protein, unknown function                                | 1.32  | 0.49    | 1.44    |
| PF3D7_0502400   | merozoite surface protein 8 (MSP8)                                            | -1.50 | 272.89  | 108.95  |
| PF3D7_0502500   | conserved Plasmodium protein, unknown function                                | -2.04 | 1.86    | 0.50    |
| PF3D7_0502600   | conserved Plasmodium protein, unknown function                                | -0.25 | 5.45    | 5.19    |
| PF3D7_0502700   | conserved Plasmodium protein, unknown function                                | -0.81 | 7.30    | 4.71    |
| PF3D7_0502800   | DnaJ protein, putative                                                        | -1.48 | 30.30   | 12.24   |
| PF3D7_0502900   | mitochondrial inner membrane TIM10 associated protein, putative               | 0.84  | 23.57   | 47.90   |
| PF3D7_0503000   | 50S ribosomal protein L28, apicoplast, putative                               | 2.00  | 20.90   | 94.54   |
| PF3D7_0503100   | 4-diphosphocytidyl-2-C-methyl-D-erythritol kinase, putative (IspE)            | 0.04  | 7.83    | 9.11    |
| PF3D7_0503200   | conserved Plasmodium protein, unknown function                                | 1.06  | 10.39   | 24.44   |
| PF3D7_0503300   | serine/arginine-rich splicing factor 12 (SRSF12)                              | -0.24 | 321.50  | 306.53  |
| PF3D7_0503400   | actin-depolymerizing factor 1 (ADF1)                                          | 2.39  | 160.68  | 951.44  |
| PF3D7_0503500   | protein kinase, putative                                                      | 0.20  | 7.53    | 9.76    |
| PF3D7_0503600   | myosin B (MyoB)                                                               | 2.69  | 20.99   | 153.26  |
| PF3D7_0503800   | 60S ribosomal protein L31 (RPL31)                                             | -0.79 | 429.36  | 280.81  |
| PF3D7_0503900   | conserved Plasmodium protein, unknown function                                | 0.33  | 2.26    | 3.21    |
| PF3D7_0504000   | cation transporting P-ATPase (ATPase3)                                        | 0.54  | 10.96   | 18.06   |
| PF3D7_0504100   | AN1-like zinc finger family protein                                           | 1.13  | 6.86    | 16.99   |
| PF3D7_0504200   | ATP-dependent helicase, putative                                              | 1.50  | 6.35    | 20.30   |
| PF3D7_0504300   | conserved Plasmodium protein, unknown function                                | -0.52 | 2.49    | 1.96    |
| PF3D7_0504400   | ATP-dependent helicase, putative                                              | 0.60  | 16.71   | 28.58   |
| PF3D7_0504500   | conserved Plasmodium protein, unknown function                                | 1.41  | 1.08    | 3.30    |
| PF3D7_0504600   | 2-oxoisovalerate dehydrogenase subunit beta, mitochondrial, putative (BCKDHB) | 0.37  | 28.62   | 41.65   |
| PF3D7_0504700   | centrosomal protein CEP120, putative (CEP120)                                 | 1.70  | 5.22    | 19.15   |
| PF3D7_0504800   | conserved Plasmodium protein, unknown function                                | 0.10  | 12.06   | 14.55   |
| PF3D7_0504900   | conserved protein, unknown function                                           | 0.47  | 15.88   | 24.82   |
| PF3D7_0505000   | conserved Plasmodium membrane protein, unknown function                       | -2.26 | 53.04   | 12.47   |
| PF3D7_0505100   | trafficking protein particle complex subunit 8, putative (TRS85)              | -0.72 | 36.53   | 25.04   |
| PF3D7_0505200   | actin-like protein, putative (ALP2b)                                          | 1.46  | 9.71    | 30.12   |
| PF3D7_0505300   | UDP-N-acetyl glucosamine:UMP antiporter                                       | 2.59  | 0.96    | 6.65    |
| PF3D7_0505400   | conserved Plasmodium protein, unknown function                                | 0.89  | 14.21   | 29.70   |
| PF3D7_0505500   | DNA mismatch repair protein MSH6, putative (MSH6)                             | 0.26  | 21.60   | 29.15   |
| PF3D7_0505600   | conserved Plasmodium protein, unknown function                                | -1.09 | 18.04   | 9.53    |
| PF3D7_0505700   | conserved Plasmodium membrane protein, unknown function                       | -0.29 | 57.99   | 53.73   |
| PF3D7_0505800   | small ubiquitin-related modifier (SUMO)                                       | -0.52 | 290.97  | 228.80  |
| PF3D7_0505900   | conserved Plasmodium protein, unknown function                                | -0.26 | 57.20   | 54.12   |
| PF3D7_0506000   | conserved Plasmodium protein, unknown function                                | -1.70 | 16.29   | 5.63    |
| PF3D7_0506100   | 60S ribosomal subunit protein L24-2, putative                                 | -0.86 | 94.84   | 59.14   |
| PF3D7_0506200   | TATA-box-binding protein (TBP)                                                | -1.75 | 34.69   | 11.63   |
| PF3D7_0506300   | conserved Plasmodium protein, unknown function                                | 1.44  | 4.72    | 14.52   |
| PF3D7_0506400   | conserved Plasmodium protein, unknown function                                | 2.33  | 1.28    | 7.55    |
| PF3D7_0506500   | conserved Plasmodium protein, unknown function                                | 1.08  | 11.71   | 27.91   |

|               |                                                                                       |       |         |         |
|---------------|---------------------------------------------------------------------------------------|-------|---------|---------|
| PF3D7_0506600 | histone deacetylase, putative, pseudogene                                             | -0.33 | 2.10    | 1.88    |
| PF3D7_0506700 | GTPase-activating protein, putative                                                   | -0.34 | 31.96   | 28.52   |
| PF3D7_0506800 | transcription factor 25, putative (TCF25)                                             | -1.09 | 74.72   | 39.63   |
| PF3D7_0506900 | rhomoid protease ROM4 (ROM4)                                                          | 1.24  | 74.38   | 198.44  |
| PF3D7_0507000 | conserved Plasmodium protein, unknown function                                        | 0.36  | 2.47    | 3.62    |
| PF3D7_0507100 | 60S ribosomal protein L4 (RPL4)                                                       | -1.13 | 2239.80 | 1153.72 |
| PF3D7_0507200 | subtilisin-like protease 3 (SUB3)                                                     | 0.32  | 19.46   | 27.43   |
| PF3D7_0507300 | conserved Plasmodium protein, unknown function                                        | 3.17  | 3.99    | 40.54   |
| PF3D7_0507400 | conserved Plasmodium protein, unknown function                                        | 2.39  | 8.44    | 50.24   |
| PF3D7_0507500 | subtilisin-like protease 1 (SUB1)                                                     | 4.02  | 21.12   | 388.15  |
| PF3D7_0507600 | cell differentiation protein, putative (CAF40)                                        | -0.76 | 67.39   | 44.91   |
| PF3D7_0507700 | nuclear protein localization protein 4, putative (NPL4)                               | -0.05 | 47.12   | 51.52   |
| PF3D7_0507800 | conserved Plasmodium protein, unknown function                                        | -0.32 | 157.38  | 142.02  |
| PF3D7_0507900 | conserved Plasmodium protein, unknown function                                        | -0.95 | 36.45   | 21.25   |
| PF3D7_0508000 | 6-cysteine protein (P38)                                                              | 0.70  | 82.77   | 151.77  |
| PF3D7_0508100 | SET domain protein, putative (SET9)                                                   | 0.59  | 48.70   | 83.02   |
| PF3D7_0508200 | longevity-assurance (LAG1) protein, putative                                          | 0.40  | 8.37    | 12.50   |
| PF3D7_0508300 | triose phosphate transporter (TPT)                                                    | -1.29 | 56.05   | 25.80   |
| PF3D7_0508400 | transcription factor IIb, putative                                                    | 0.67  | 6.02    | 10.83   |
| PF3D7_0508500 | guanidine nucleotide exchange factor (RCC1)                                           | 0.05  | 21.08   | 24.61   |
| PF3D7_0508600 | conserved Plasmodium protein, unknown function                                        | -0.53 | 75.38   | 58.77   |
| PF3D7_0508700 | pre-mRNA-processing ATP-dependent RNA helicase PRP5, putative (PRP5)                  | -0.28 | 46.82   | 43.50   |
| PF3D7_0508800 | single-stranded DNA-binding protein (SSB)                                             | 0.41  | 44.09   | 66.27   |
| PF3D7_0508900 | conserved Plasmodium protein, unknown function                                        | 1.23  | 45.64   | 120.70  |
| PF3D7_0509000 | SNAP protein (soluble N-ethylmaleimide-sensitive factor attachment protein), putative | -0.22 | 46.85   | 45.28   |
| PF3D7_0509100 | chromosome condensation protein, putative                                             | 1.14  | 15.39   | 38.37   |
| PF3D7_0509200 | leucine-rich repeat protein (LRR2)                                                    | 0.65  | 0.70    | 1.26    |
| PF3D7_0509300 | conserved Plasmodium protein, unknown function                                        | -0.04 | 23.82   | 26.21   |
| PF3D7_0509400 | RNA polymerase I (RNAPI)                                                              | -1.19 | 130.36  | 64.47   |
| PF3D7_0509500 | conserved Plasmodium protein, unknown function                                        | 0.06  | 6.48    | 7.65    |
| PF3D7_0509600 | asparagine-tRNA ligase (AsnRS)                                                        | -0.29 | 28.92   | 26.74   |
| PF3D7_0509700 | conserved Plasmodium protein, unknown function                                        | 1.30  | 2.30    | 6.41    |
| PF3D7_0509800 | phosphatidylinositol 4-kinase (PI4K)                                                  | 0.09  | 71.01   | 85.35   |
| PF3D7_0509900 | conserved Plasmodium protein, unknown function                                        | -0.07 | 3.34    | 3.59    |
| PF3D7_0510000 | conserved Plasmodium protein, unknown function                                        | 0.75  | 6.85    | 13.03   |
| PF3D7_0510100 | conserved Plasmodium protein, unknown function                                        | 0.17  | 40.41   | 51.19   |
| PF3D7_0510200 | peptidyl-prolyl cis-trans isomerase (CYP87)                                           | -0.46 | 36.78   | 30.26   |
| PF3D7_0510300 | stripes inner membrane complex protein, putative (SIP)                                | 0.72  | 1.78    | 3.34    |
| PF3D7_0510400 | conserved Plasmodium protein, unknown function                                        | -1.91 | 19.36   | 5.82    |
| PF3D7_0510500 | topoisomerase I (TopoI)                                                               | 0.21  | 45.64   | 59.45   |
| PF3D7_0510600 | tRNA Leucine                                                                          | -0.38 | 0.00    | 0.00    |
| PF3D7_0510700 | conserved Plasmodium protein, unknown function                                        | -0.14 | 3.26    | 3.34    |
| PF3D7_0510800 | WD repeat-containing protein, putative                                                | 1.75  | 0.81    | 3.11    |
| PF3D7_0510900 | small nucleolar RNA snoR04                                                            | -0.38 | 2.41    | 2.10    |
| PF3D7_0511000 | translationally-controlled tumor protein homolog (TCTP)                               | -1.14 | 515.06  | 263.50  |
| PF3D7_0511100 | conserved Plasmodium protein, unknown function                                        | -0.90 | 5.48    | 3.30    |
| PF3D7_0511200 | stearoyl-CoA desaturase (SCD)                                                         | 0.09  | 21.65   | 26.10   |
| PF3D7_0511300 | MORN repeat protein, putative                                                         | -0.59 | 6.32    | 4.76    |
| PF3D7_0511400 | conserved Plasmodium protein, unknown function                                        | 1.03  | 1.58    | 3.67    |
| PF3D7_0511500 | RNA pseudouridylylase, putative                                                       | -0.27 | 106.05  | 99.55   |
| PF3D7_0511600 | apical rhothry neck protein (ARNP)                                                    | 0.35  | 21.29   | 30.74   |
| PF3D7_0511700 | EKC/KEOPS complex subunit CG121 (CG121)                                               | -0.51 | 23.56   | 18.73   |
| PF3D7_0511800 | inositol-3-phosphate synthase (INO1)                                                  | -1.49 | 384.55  | 154.16  |
| PF3D7_0511900 | conserved Plasmodium protein, unknown function                                        | -2.68 | 6.94    | 1.22    |
| PF3D7_0512000 | prefoldin subunit, putative                                                           | 0.31  | 26.07   | 36.65   |
| PF3D7_0512100 | conserved Plasmodium protein, unknown function                                        | 0.23  | 5.56    | 7.40    |
| PF3D7_0512200 | glutathione synthetase (GS)                                                           | -1.06 | 16.24   | 8.79    |
| PF3D7_0512300 | CDK-activating kinase assembly factor (MAT1)                                          | -1.21 | 42.83   | 20.86   |
| PF3D7_0512400 | conserved Plasmodium protein, unknown function                                        | -2.46 | 9.91    | 2.02    |
| PF3D7_0512500 | conserved Plasmodium protein, unknown function                                        | -0.57 | 8.36    | 6.38    |
| PF3D7_0512600 | ras-related protein Rab-1B (RAB1b)                                                    | -0.58 | 242.24  | 183.49  |
| PF3D7_0512700 | orotate phosphoribosyltransferase (OPRT)                                              | -1.11 | 40.06   | 20.90   |
| PF3D7_0512800 | conserved Plasmodium protein, unknown function                                        | 0.19  | 3.50    | 4.51    |
| PF3D7_0512900 | conserved Plasmodium protein, unknown function                                        | -0.64 | 6.57    | 4.76    |
| PF3D7_0513000 | conserved Plasmodium protein, unknown function                                        | 0.44  | 12.53   | 19.23   |
| PF3D7_0513100 | conserved Plasmodium protein, unknown function                                        | -0.72 | 42.58   | 29.18   |
| PF3D7_0513200 | conserved Plasmodium protein, unknown function                                        | -1.14 | 52.25   | 26.73   |
| PF3D7_0513300 | purine nucleoside phosphorylase (PNP)                                                 | -0.32 | 478.47  | 433.65  |
| PF3D7_0513400 | GTP-binding protein, putative                                                         | -0.04 | 9.21    | 10.10   |
| PF3D7_0513500 | mitochondrial import inner membrane translocase subunit TIM16, putative (PAM16)       | -2.07 | 28.97   | 7.74    |
| PF3D7_0513600 | deoxyribodipyrimidine photo-lyase, putative                                           | 1.06  | 27.29   | 64.13   |
| PF3D7_0513700 | secreted ookinete protein, putative (PSOP12)                                          | 0.82  | 2.18    | 4.36    |
| PF3D7_0513800 | ras-related protein Rab-1A (RAB1a)                                                    | 0.63  | 18.81   | 32.98   |
| PF3D7_0513900 | conserved Plasmodium protein, unknown function                                        | 0.72  | 3.81    | 7.12    |
| PF3D7_0514000 | tubulin-tyrosine ligase, putative (TTL)                                               | 1.07  | 4.36    | 10.37   |
| PF3D7_0514100 | ATP-dependent DNA helicase UvrD (UvrD)                                                | 0.66  | 7.46    | 13.35   |
| PF3D7_0514200 | conserved Plasmodium protein, unknown function                                        | -0.11 | 11.29   | 11.78   |
| PF3D7_0514300 | aspartate-tRNA ligase, putative                                                       | 0.69  | 7.21    | 13.14   |
| PF3D7_0514400 | tRNA Phenylalanine                                                                    | -1.38 | 0.31    | 0.00    |
| PF3D7_0514500 | conserved Plasmodium membrane protein, unknown function                               | 1.01  | 1.14    | 2.65    |
| PF3D7_0514600 | ribose 5-phosphate epimerase, putative                                                | -0.78 | 30.09   | 19.79   |
| PF3D7_0514700 | conserved Plasmodium protein, unknown function                                        | 0.24  | 0.27    | 0.37    |
| PF3D7_0514800 | kinase, putative                                                                      | -1.13 | 18.69   | 9.64    |
| PF3D7_0514900 | conserved Plasmodium protein, unknown function                                        | -1.19 | 35.14   | 17.40   |
| PF3D7_0515000 | pre-mRNA-splicing factor CWC2, putative (CWC2)                                        | -0.95 | 145.04  | 84.85   |
| PF3D7_0515100 | rhomoid protease ROM9 (ROM9)                                                          | 0.06  | 4.12    | 4.86    |
| PF3D7_0515200 | conserved Plasmodium protein, unknown function                                        | -0.17 | 4.12    | 4.13    |
| PF3D7_0515300 | phosphatidylinositol 3-kinase (PI3K)                                                  | 0.10  | 20.46   | 24.78   |
| PF3D7_0515400 | conserved Plasmodium protein, unknown function                                        | 1.10  | 43.34   | 104.62  |
| PF3D7_0515500 | amino acid transporter, putative                                                      | 0.63  | 1.20    | 2.10    |
| PF3D7_0515600 | conserved Plasmodium protein, unknown function                                        | 0.89  | 1.83    | 3.84    |
| PF3D7_0515700 | glideosome-associated protein 40, putative (GAP40)                                    | 1.12  | 328.94  | 810.15  |
| PF3D7_0515800 | BolA-like protein, putative                                                           | -0.88 | 20.29   | 12.46   |
| PF3D7_0515900 | NLI interacting factor-like phosphatase, putative (NIF2)                              | -0.10 | 16.02   | 16.94   |
| PF3D7_0516000 | RAP protein, putative                                                                 | 1.65  | 2.62    | 9.28    |
| PF3D7_0516100 | cation-transporting ATPase 1 (ATPase1)                                                | 0.23  | 3.08    | 4.08    |
| PF3D7_0516200 | 40S ribosomal protein S11                                                             | -1.19 | 1070.76 | 531.75  |
| PF3D7_0516300 | tRNA pseudouridine synthase, putative                                                 | -1.33 | 75.57   | 33.91   |

|               |                                                                               |       |         |         |
|---------------|-------------------------------------------------------------------------------|-------|---------|---------|
| PF3D7_0516400 | phosducin-like protein, putative (PhLP3)                                      | 0.67  | 16.62   | 29.99   |
| PF3D7_0516500 | metabolite/drug transporter, putative                                         | 1.89  | 9.17    | 38.34   |
| PF3D7_0516600 | sporozoite surface antigen MB2 (MB2)                                          | 0.16  | 20.09   | 25.28   |
| PF3D7_0516700 | ubiquitin carboxyl-terminal hydrolase 2, putative                             | -0.43 | 109.85  | 92.41   |
| PF3D7_0516800 | transcription factor with AP2 domain(s) (ApiAP2)                              | 0.02  | 32.87   | 37.66   |
| PF3D7_0516900 | 60S ribosomal protein L2 (RPL2)                                               | -0.86 | 1596.75 | 995.08  |
| PF3D7_0517000 | 60S ribosomal protein L12, putative                                           | -0.95 | 1071.63 | 624.98  |
| PF3D7_0517100 | conserved Plasmodium protein, unknown function                                | -0.29 | 5.43    | 5.01    |
| PF3D7_0517200 | conserved Plasmodium protein, unknown function                                | -0.27 | 66.23   | 61.85   |
| PF3D7_0517300 | serine/arginine-rich splicing factor 1 (SR1)                                  | -1.03 | 1138.41 | 628.15  |
| PF3D7_0517400 | FACT complex subunit SPT16, putative (FACT-L)                                 | -0.50 | 75.37   | 60.08   |
| PF3D7_0517500 | UTP--glucose-1-phosphate uridylyltransferase, putative                        | -0.53 | 7.06    | 5.50    |
| PF3D7_0517600 | F-actin-capping protein subunit beta, putative (CPbeta)                       | -0.90 | 13.71   | 8.27    |
| PF3D7_0517700 | eukaryotic translation initiation factor 3 subunit B, putative (EIF3B)        | -1.03 | 326.25  | 179.89  |
| PF3D7_0517800 | apicortin, putative                                                           | -0.32 | 1.66    | 1.50    |
| PF3D7_0517900 | zinc finger protein, putative                                                 | 0.19  | 24.21   | 31.11   |
| PF3D7_0518000 | conserved protein, unknown function                                           | -0.30 | 32.68   | 29.89   |
| PF3D7_0518100 | RAP protein, putative                                                         | 0.40  | 6.87    | 10.27   |
| PF3D7_0518200 | SWIB/MDM2 domain-containing protein, putative                                 | 0.23  | 43.50   | 57.59   |
| PF3D7_0518300 | proteasome subunit beta type-1, putative                                      | -0.34 | 118.07  | 105.16  |
| PF3D7_0518400 | cyclin (CYC3)                                                                 | -1.10 | 2.76    | 1.44    |
| PF3D7_0518500 | ATP-dependent RNA helicase DDX23, putative (DDX23)                            | -0.48 | 60.69   | 49.11   |
| PF3D7_0518600 | WD repeat-containing protein 26, putative (WDR26)                             | 0.70  | 12.01   | 21.97   |
| PF3D7_0518700 | mRNA-binding protein PUF1 (PUF1)                                              | 0.21  | 4.37    | 5.72    |
| PF3D7_0518800 | secreted ookinete protein, putative (PSOP13)                                  | 3.25  | 0.07    | 1.15    |
| PF3D7_0518900 | conserved Plasmodium protein, unknown function                                | 2.59  | 1.26    | 8.80    |
| PF3D7_0519000 | histone RNA hairpin-binding protein, putative (SLBP)                          | 1.63  | 4.17    | 14.63   |
| PF3D7_0519100 | mitochondrial ribosomal protein L14 precursor, putative                       | 0.59  | 25.45   | 43.24   |
| PF3D7_0519200 | V-type proton ATPase 16 kDa proteolipid subunit                               | 0.39  | 269.88  | 398.57  |
| PF3D7_0519300 | cytochrome c oxidase assembly protein (heme A: farnesyltransferase), putative | 0.73  | 6.13    | 11.50   |
| PF3D7_0519400 | 40S ribosomal protein S24 (RPS24)                                             | -0.47 | 1231.70 | 1001.62 |
| PF3D7_0519500 | carbon catabolite repressor protein 4, putative (CCR4)                        | -0.21 | 20.28   | 19.82   |
| PF3D7_0519600 | zinc finger protein, putative                                                 | -0.68 | 54.28   | 38.28   |
| PF3D7_0519700 | conserved Plasmodium protein, unknown function                                | -1.24 | 427.18  | 204.33  |
| PF3D7_0519800 | conserved protein, unknown function                                           | -1.15 | 284.71  | 144.95  |
| PF3D7_0519900 | conserved Plasmodium protein, unknown function                                | 0.05  | 6.97    | 8.14    |
| PF3D7_0520000 | 40S ribosomal protein S9, putative                                            | -0.76 | 1147.10 | 767.03  |
| PF3D7_0520100 | protein phosphatase PPM9, putative (PPM9)                                     | -1.47 | 37.22   | 15.21   |
| PF3D7_0520200 | conserved Plasmodium protein, unknown function                                | -0.24 | 20.83   | 19.98   |
| PF3D7_0520300 | U6 snRNA-associated Sm-like protein LSM2, putative (LSM2)                     | -0.49 | 32.38   | 26.11   |
| PF3D7_0520400 | conserved Plasmodium protein, unknown function                                | -0.33 | 19.98   | 17.96   |
| PF3D7_0520500 | phosphomethylpyrimidine kinase, putative                                      | -0.23 | 20.72   | 19.99   |
| PF3D7_0520600 | bis(5'-nucleosyl)-tetraphosphatase [asymmetrical]                             | -1.22 | 185.98  | 90.28   |
| PF3D7_0520700 | conserved Plasmodium protein, unknown function                                | -1.43 | 11.89   | 4.97    |
| PF3D7_0520800 | conserved Plasmodium protein, unknown function                                | -0.29 | 20.56   | 18.97   |
| PF3D7_0520900 | S-adenosyl-L-homocysteine hydrolase (SAHH)                                    | -0.62 | 479.82  | 351.41  |
| PF3D7_0521000 | conserved Plasmodium protein, unknown function                                | -0.97 | 53.75   | 30.92   |
| PF3D7_0521100 | conserved Plasmodium protein, unknown function                                | 0.55  | 0.21    | 0.34    |
| PF3D7_0521200 | conserved Plasmodium protein, unknown function                                | 0.76  | 1.48    | 2.84    |
| PF3D7_0521300 | conserved Plasmodium protein, unknown function                                | -1.24 | 28.53   | 13.64   |
| PF3D7_0521400 | conserved Plasmodium protein, unknown function                                | 0.21  | 8.66    | 11.35   |
| PF3D7_0521500 | ribosomal large subunit pseudouridylylase synthase, putative                  | -0.06 | 6.20    | 6.72    |
| PF3D7_0521600 | conserved Plasmodium protein, unknown function                                | -1.66 | 17.70   | 6.30    |
| PF3D7_0521700 | DEAD/DEAH box ATP-dependent RNA helicase, putative                            | -2.40 | 19.11   | 4.08    |
| PF3D7_0521800 | nucleotide binding protein, putative                                          | 0.04  | 3.71    | 4.32    |
| PF3D7_0521900 | conserved Plasmodium protein, unknown function                                | -0.43 | 2.52    | 2.11    |
| PF3D7_0522000 | conserved Plasmodium protein, unknown function                                | -0.40 | 11.34   | 9.69    |
| PF3D7_0522100 | conserved Plasmodium protein, unknown function                                | 1.04  | 9.70    | 22.51   |
| PF3D7_0522200 | transcription initiation factor TFHD subunit 10, putative (TAF10)             | -0.95 | 37.97   | 22.21   |
| PF3D7_0522300 | S-adenosylmethionine-dependent methyltransferase, putative                    | -0.18 | 69.45   | 69.10   |
| PF3D7_0522400 | conserved Plasmodium protein, unknown function                                | 1.76  | 5.95    | 22.80   |
| PF3D7_0522500 | 50S ribosomal protein L17, apicoplast, putative (RPL17)                       | 1.04  | 9.88    | 22.99   |
| PF3D7_0522600 | inner membrane complex protein                                                | -0.22 | 27.94   | 27.15   |
| PF3D7_0522700 | iron-sulfur assembly protein, putative (SufA)                                 | 0.75  | 4.45    | 8.50    |
| PF3D7_0522800 | G10 protein, putative                                                         | -0.61 | 45.66   | 33.67   |
| PF3D7_0522900 | zinc finger protein, putative                                                 | 0.44  | 4.38    | 6.72    |
| PF3D7_0523000 | multidrug resistance protein 1 (MDR1)                                         | -1.57 | 602.34  | 229.78  |
| PF3D7_0523100 | mitochondrial processing peptidase alpha subunit, putative                    | -0.14 | 35.94   | 36.81   |
| PF3D7_0523200 | conserved Plasmodium protein, unknown function                                | -0.67 | 5.35    | 3.78    |
| PF3D7_0523300 | conserved Plasmodium protein, unknown function                                | 0.58  | 17.38   | 29.41   |
| PF3D7_0523400 | DnaJ protein, putative                                                        | 0.52  | 77.50   | 125.19  |
| PF3D7_0523500 | outer arm dynein lc3, putative                                                | -0.01 | 1.31    | 1.48    |
| PF3D7_0523600 | conserved Plasmodium protein, unknown function                                | 0.62  | 9.51    | 16.55   |
| PF3D7_0523700 | conserved Plasmodium membrane protein, unknown function                       | -0.40 | 3.19    | 2.73    |
| PF3D7_0523800 | transporter, putative                                                         | -2.15 | 88.72   | 22.62   |
| PF3D7_0523900 | conserved Plasmodium membrane protein, unknown function                       | -1.83 | 90.66   | 28.76   |
| PF3D7_0524000 | karyopherin beta (KASbeta)                                                    | -0.91 | 897.51  | 539.89  |
| PF3D7_0524100 | conserved Plasmodium protein, unknown function                                | -0.88 | 44.55   | 27.35   |
| PF3D7_0524200 | conserved Plasmodium membrane protein, unknown function                       | 1.00  | 8.62    | 19.57   |
| PF3D7_0524300 | conserved Plasmodium protein, unknown function                                | -0.52 | 40.07   | 31.56   |
| PF3D7_0524400 | cytosolic preribosomal GTP-binding protein, putative                          | -0.88 | 215.65  | 132.01  |
| PF3D7_0524500 | conserved Plasmodium protein, unknown function                                | -1.07 | 30.11   | 16.14   |
| PF3D7_0524600 | 50S ribosomal protein L12, apicoplast, putative                               | 0.66  | 20.72   | 36.92   |
| PF3D7_0524700 | mitochondrial import receptor subunit TOM22, putative (TOM22)                 | -0.89 | 49.24   | 30.09   |
| PF3D7_0524800 | ubiquitin fusion degradation protein UFD1, putative                           | 0.58  | 11.63   | 19.65   |
| PF3D7_0524900 | tRNA-YW synthesizing protein, putative                                        | -1.18 | 64.01   | 31.92   |
| PF3D7_0525000 | zinc finger protein, putative                                                 | 0.56  | 9.00    | 15.00   |
| PF3D7_0525100 | acyl-CoA synthetase (ACS10)                                                   | 0.05  | 320.21  | 373.74  |
| PF3D7_0525200 | conserved Plasmodium protein, unknown function                                | 0.85  | 20.21   | 41.14   |
| PF3D7_0525300 | conserved Plasmodium protein, unknown function                                | 2.82  | 2.52    | 20.27   |
| PF3D7_0525400 | G-protein coupled receptor, putative                                          | 0.86  | 10.31   | 21.10   |
| PF3D7_0525500 | WD repeat-containing protein, putative                                        | -1.61 | 17.00   | 6.28    |
| PF3D7_0525600 | RNA methyltransferase, putative                                               | 1.14  | 7.57    | 18.94   |
| PF3D7_0525700 | conserved Plasmodium protein, unknown function                                | 1.08  | 17.08   | 40.80   |
| PF3D7_0525800 | inner membrane complex protein 1g, putative (IMC1g)                           | 3.50  | 168.63  | 2149.74 |
| PF3D7_0525900 | NIMA related kinase 2 (NEK2)                                                  | 1.52  | 1.51    | 4.93    |
| PF3D7_0526000 | RAP protein, putative                                                         | 0.83  | 3.77    | 7.58    |
| PF3D7_0526100 | conserved Plasmodium membrane protein, unknown function                       | -0.20 | 2.13    | 2.09    |

|                 |                                                                         |       |         |         |
|-----------------|-------------------------------------------------------------------------|-------|---------|---------|
| PF3D7_0526200.1 | ADP-ribosylation factor GTPase-activating protein, putative (ARF-GAP)   | 0.84  | 27.22   | 54.90   |
| PF3D7_0526200.2 | ADP-ribosylation factor GTPase-activating protein, putative (ARF-GAP)   | 0.83  | 27.24   | 54.89   |
| PF3D7_0526300   | nucleolar Jumonji domain interacting protein, putative                  | -1.39 | 82.62   | 35.61   |
| PF3D7_0526400   | conserved Plasmodium protein, unknown function                          | 0.62  | 6.81    | 11.85   |
| PF3D7_0526500   | conserved Plasmodium protein, unknown function                          | -1.52 | 84.37   | 33.30   |
| PF3D7_0526600   | conserved Plasmodium protein, unknown function                          | 0.25  | 7.54    | 10.14   |
| PF3D7_0526700   | conserved Plasmodium protein, unknown function                          | -0.02 | 18.76   | 20.93   |
| PF3D7_0526800   | conserved Plasmodium protein, unknown function                          | -1.28 | 205.18  | 95.15   |
| PF3D7_0526900   | transmembrane emp24 domain-containing protein, putative                 | -1.14 | 316.86  | 162.03  |
| PF3D7_0527000   | DNA replication licensing factor MCM3, putative (MCM3)                  | 0.70  | 117.33  | 215.89  |
| PF3D7_0527100   | ubiquitin-conjugating enzyme E2 N, putative (UBC13)                     | -0.18 | 290.22  | 290.11  |
| PF3D7_0527200   | ubiquitin carboxyl-terminal hydrolase 14, putative (USP14)              | -0.12 | 118.31  | 122.95  |
| PF3D7_0527300   | methionine aminopeptidase 1a, putative (METAP1a)                        | -0.63 | 70.25   | 51.30   |
| PF3D7_0527400   | conserved Plasmodium protein, unknown function                          | -1.74 | 136.48  | 46.18   |
| PF3D7_0527500   | Hsc70-interacting protein (HIP)                                         | -0.32 | 603.34  | 546.64  |
| PF3D7_0527600   | conserved Plasmodium protein, unknown function                          | 0.20  | 42.54   | 55.02   |
| PF3D7_0527700   | tRNA Glutamic acid                                                      | 1.62  | 0.00    | 0.80    |
| PF3D7_0527800   | tRNA Leucine                                                            | -1.38 | 0.27    | 0.00    |
| PF3D7_0527900   | RNA helicase 1                                                          | -0.77 | 89.61   | 59.47   |
| PF3D7_0528000   | proteasome maturation factor UMP1, putative (UMP1)                      | -0.95 | 83.21   | 48.65   |
| PF3D7_0528100   | AP-1 complex subunit beta, putative                                     | -0.95 | 122.45  | 71.45   |
| PF3D7_0528200   | eukaryotic translation initiation factor 3 subunit E, putative (EIF3E)  | -1.10 | 320.82  | 168.80  |
| PF3D7_0528300   | conserved Plasmodium protein, unknown function                          | 1.59  | 9.95    | 33.95   |
| PF3D7_0528400   | palmitoyltransferase (DHHC7)                                            | 0.83  | 57.04   | 114.23  |
| PF3D7_0528500   | F-actin-capping protein subunit alpha, putative (CPalpha)               | 0.10  | 11.95   | 14.45   |
| PF3D7_0528600   | conserved Plasmodium protein, unknown function                          | -0.83 | 64.66   | 41.19   |
| PF3D7_0528700   | peptidyl-prolyl cis-trans isomerase (CYP23)                             | -1.39 | 158.91  | 68.42   |
| PF3D7_0528800   | nucleolar preribosomal GTPase, putative                                 | -1.48 | 52.65   | 21.39   |
| PF3D7_0528900   | conserved Plasmodium protein, unknown function                          | -0.08 | 3.95    | 4.23    |
| PF3D7_0529000   | conserved Plasmodium protein, unknown function                          | -0.92 | 112.19  | 66.84   |
| PF3D7_0529100   | conserved Plasmodium protein, unknown function                          | -0.04 | 8.20    | 9.04    |
| PF3D7_0529200   | sugar transporter, putative                                             | 0.97  | 1.70    | 3.78    |
| PF3D7_0529300   | apicoplast TIC22 protein (TIC22)                                        | 0.50  | 4.24    | 6.80    |
| PF3D7_0529400.1 | conserved Plasmodium protein, unknown function                          | 0.74  | 48.51   | 91.55   |
| PF3D7_0529400.2 | conserved Plasmodium protein, unknown function                          | 0.70  | 48.66   | 89.29   |
| PF3D7_0529500   | cell cycle regulator protein, putative                                  | -1.94 | 77.36   | 22.70   |
| PF3D7_0529600   | tRNA Arginine                                                           | -1.38 | 0.31    | 0.00    |
| PF3D7_0529700   | conserved Plasmodium protein, unknown function                          | 0.65  | 2.03    | 3.61    |
| PF3D7_0529800   | conserved Plasmodium protein, unknown function                          | 1.15  | 9.54    | 23.96   |
| PF3D7_0529900   | RING zinc finger protein, putative                                      | -0.85 | 214.64  | 134.61  |
| PF3D7_0530000   | conserved Plasmodium protein, unknown function                          | 0.41  | 66.74   | 100.10  |
| PF3D7_0530100   | SNARE protein, putative (SYN6)                                          | 0.89  | 76.55   | 160.35  |
| PF3D7_0530200   | phosphoenolpyruvate/phosphate translocator (PPT)                        | -0.03 | 24.31   | 26.88   |
| PF3D7_0530300   | conserved Plasmodium membrane protein, unknown function                 | 0.06  | 11.52   | 13.61   |
| PF3D7_0530400   | conserved Plasmodium protein, unknown function                          | 1.47  | 0.64    | 2.02    |
| PF3D7_0530500   | conserved Plasmodium membrane protein, unknown function                 | -0.03 | 0.41    | 0.45    |
| PF3D7_0530600   | XAP-5 DNA binding protein, putative                                     | -1.08 | 46.38   | 24.84   |
| PF3D7_0530700   | conserved Plasmodium protein, unknown function                          | -1.60 | 23.47   | 8.76    |
| PF3D7_0530800   | CPW-WPC family protein                                                  | 0.74  | 7.06    | 13.30   |
| PF3D7_0530900   | formin 1                                                                | 0.80  | 10.88   | 21.42   |
| PF3D7_0531000   | conserved Plasmodium protein, unknown function                          | -1.26 | 25.67   | 12.12   |
| PF3D7_0531100   | conserved Plasmodium protein, unknown function                          | 0.56  | 3.82    | 6.35    |
| PF3D7_0531200   | mitochondrial ribosomal protein S16 precursor, putative                 | 0.78  | 4.85    | 9.44    |
| PF3D7_0531300   | conserved Plasmodium protein, unknown function                          | 0.68  | 8.43    | 15.32   |
| PF3D7_0531400   | conserved Plasmodium protein, unknown function                          | -1.47 | 17.91   | 7.31    |
| PF3D7_0531500   | unspecified product                                                     | -0.38 | 0.06    | 0.05    |
| PF3D7_0531600   | 18S ribosomal RNA                                                       | 0.90  | 938.56  | 1980.98 |
| PF3D7_0531700   | unspecified product                                                     | 1.66  | 0.50    | 1.95    |
| PF3D7_0531800   | 5.8S ribosomal RNA                                                      | 3.26  | 54.38   | 590.47  |
| PF3D7_0531900   | unspecified product                                                     | -0.31 | 18.01   | 16.36   |
| PF3D7_0532000   | 28S ribosomal RNA                                                       | 2.65  | 1196.99 | 8500.99 |
| PF3D7_0532100   | early transcribed membrane protein 5 (ETRAMP5)                          | -0.49 | 3438.18 | 2774.52 |
| PF3D7_0532200   | Plasmodium exported protein (PHISTc), unknown function                  | -1.01 | 20.66   | 11.59   |
| PF3D7_0532300   | Plasmodium exported protein (PHISTb), unknown function                  | -1.93 | 956.27  | 282.98  |
| PF3D7_0532400   | lysine-rich membrane-associated PHISTb protein (LyMP)                   | -0.51 | 192.80  | 153.33  |
| PF3D7_0532500   | Plasmodium exported protein, unknown function                           | 1.67  | 1.65    | 6.12    |
| PF3D7_0532600   | Plasmodium exported protein, unknown function                           | 1.57  | 9.68    | 32.52   |
| PF3D7_0532700   | erythrocyte membrane protein 1 (PEMP1), pseudogene (VAR)                | -1.08 | 1.00    | 0.53    |
| PF3D7_0532800   | stevor, pseudogene                                                      | -3.32 | 5.24    | 0.57    |
| PF3D7_0532900   | rifin (RIF)                                                             | -1.71 | 4.24    | 1.45    |
| PF3D7_0533000   | rifin, pseudogene (RIF)                                                 | -0.30 | 1.22    | 1.12    |
| PF3D7_0533100   | erythrocyte membrane protein 1 (PEMP1), truncated, pseudogene (VAR1CSA) | -0.49 | 11.48   | 9.26    |
| PF3D7_0600100   | erythrocyte membrane protein 1 (PEMP1), pseudogene (VAR)                | 0.47  | 0.11    | 0.20    |
| PF3D7_0600200   | erythrocyte membrane protein 1, PEMP1 (VAR)                             | -0.82 | 0.80    | 0.51    |
| PF3D7_0600300   | rifin (RIF)                                                             | -0.79 | 0.38    | 0.24    |
| PF3D7_0600400   | erythrocyte membrane protein 1, PEMP1 (VAR)                             | -0.90 | 1.74    | 1.05    |
| PF3D7_0600500   | rifin (RIF)                                                             | -0.26 | 0.68    | 0.64    |
| PF3D7_0600600   | erythrocyte membrane protein 1 (PEMP1), exon 2 (VAR)                    | 3.08  | 0.00    | 0.15    |
| PF3D7_0600700   | rifin (RIF)                                                             | -0.07 | 0.34    | 0.37    |
| PF3D7_0600800   | rifin, pseudogene (RIF)                                                 | 1.00  | 0.08    | 0.22    |
| PF3D7_0600900   | rifin, pseudogene (RIF)                                                 | 0.24  | 0.33    | 0.45    |
| PF3D7_0601000   | exported protein family 4 (EPF4)                                        | -3.26 | 165.71  | 19.51   |
| PF3D7_0601100   | exported protein family 3 (EPF3)                                        | -3.15 | 90.63   | 11.53   |
| PF3D7_0601200   | Pfmc-2TM Maurer's cleft two transmembrane protein (MC-2TM)              | 0.13  | 3.02    | 3.73    |
| PF3D7_0601300   | exported protein family 1 (EPF1)                                        | -0.74 | 13.38   | 9.04    |
| PF3D7_0601400   | erythrocyte membrane protein 1 (PEMP1), pseudogene (VAR)                | -1.35 | 1.58    | 0.69    |
| PF3D7_0601500   | Plasmodium exported protein (PHISTb), unknown function                  | 1.70  | 0.41    | 1.57    |
| PF3D7_0601600   | tetratricopeptide repeat protein, putative                              | 0.60  | 12.31   | 21.12   |
| PF3D7_0601700   | Plasmodium exported protein (PHISTa), unknown function, pseudogene      | -1.00 | 8.11    | 4.57    |
| PF3D7_0601800   | H/ACA snoRNA                                                            | 1.62  | 0.00    | 0.54    |
| PF3D7_0601900   | conserved Plasmodium protein, unknown function                          | -1.46 | 415.29  | 170.58  |
| PF3D7_0602000   | conserved Plasmodium protein, unknown function                          | -0.21 | 10.26   | 10.05   |
| PF3D7_0602100   | ATP-dependent RNA helicase, putative                                    | -1.05 | 85.77   | 46.88   |
| PF3D7_0602200   | MYND finger protein, putative                                           | -0.83 | 42.91   | 27.17   |
| PF3D7_0602300   | liver merozoite formation protein, putative (PALM)                      | -0.85 | 0.57    | 0.35    |
| PF3D7_0602400   | elongation factor G (EF-G)                                              | 0.17  | 20.06   | 25.50   |
| PF3D7_0602500   | geranylgeranyltransferase, putative                                     | 0.11  | 8.41    | 10.22   |
| PF3D7_0602600   | conserved Plasmodium protein, unknown function                          | -1.63 | 58.13   | 21.17   |

|               |                                                                          |       |        |         |
|---------------|--------------------------------------------------------------------------|-------|--------|---------|
| PF3D7_0602700 | conserved Plasmodium protein, unknown function                           | -0.82 | 3.29   | 2.10    |
| PF3D7_0602800 | JmjC domain containing protein (JmjC2)                                   | -1.34 | 10.42  | 4.64    |
| PF3D7_0602900 | conserved Plasmodium protein, unknown function                           | -1.38 | 37.36  | 16.24   |
| PF3D7_0603000 | conserved Plasmodium protein, unknown function                           | -1.08 | 31.70  | 16.98   |
| PF3D7_0603100 | conserved Plasmodium protein, unknown function                           | 0.13  | 6.07   | 7.50    |
| PF3D7_0603200 | mitochondrial chaperone BCS1, putative                                   | 1.08  | 9.41   | 22.44   |
| PF3D7_0603300 | dihydroorotate dehydrogenase (DHODH)                                     | -0.27 | 20.45  | 19.17   |
| PF3D7_0603400 | trophozoite exported protein 1 (TEX1)                                    | -0.67 | 50.81  | 36.07   |
| PF3D7_0603500 | cation/H <sup>+</sup> antiporter (CAX)                                   | 0.47  | 13.13  | 20.50   |
| PF3D7_0603600 | conserved Plasmodium protein, unknown function                           | 1.29  | 1.41   | 3.92    |
| PF3D7_0603700 | phenylalanine--tRNA ligase (mFRS)                                        | 0.48  | 3.04   | 4.80    |
| PF3D7_0603800 | centrosomal protein CEP76, putative (CEP76)                              | 0.56  | 14.61  | 24.38   |
| PF3D7_0603900 | conserved Plasmodium protein, unknown function                           | 1.54  | 1.01   | 3.37    |
| PF3D7_0604000 | conserved Plasmodium protein, unknown function                           | 1.03  | 0.81   | 1.87    |
| PF3D7_0604100 | transcription factor with AP2 domain(s) (SIP2)                           | -0.19 | 51.59  | 51.04   |
| PF3D7_0604200 | mitochondrial ribosomal protein L41, putative                            | 1.26  | 2.78   | 7.67    |
| PF3D7_0604300 | conserved Plasmodium protein, unknown function                           | -0.18 | 14.68  | 14.61   |
| PF3D7_0604400 | conserved Plasmodium protein, unknown function                           | -2.88 | 0.67   | 0.07    |
| PF3D7_0604500 | conserved Plasmodium protein, unknown function                           | -0.45 | 249.43 | 206.18  |
| PF3D7_0604600 | DNA helicase, putative                                                   | 1.74  | 1.45   | 5.50    |
| PF3D7_0604700 | glyoxalase I (GILP)                                                      | 0.86  | 16.53  | 33.81   |
| PF3D7_0604800 | RAP protein, putative                                                    | -0.20 | 0.96   | 0.94    |
| PF3D7_0604900 | conserved Plasmodium protein, unknown function                           | 0.86  | 2.72   | 5.68    |
| PF3D7_0605000 | 50S ribosomal protein L24, putative                                      | 1.35  | 4.48   | 12.99   |
| PF3D7_0605100 | RNA-binding protein, putative                                            | -0.78 | 154.66 | 101.66  |
| PF3D7_0605200 | conserved Plasmodium protein, unknown function                           | 0.75  | 12.66  | 24.16   |
| PF3D7_0605300 | serine/threonine protein kinase (ARK1)                                   | 1.32  | 9.77   | 27.64   |
| PF3D7_0605400 | calcium-binding protein, putative                                        | 0.26  | 5.43   | 7.38    |
| PF3D7_0605500 | cyclin dependent kinase binding protein, putative                        | 0.09  | 5.01   | 6.04    |
| PF3D7_0605600 | nucleoside diphosphate kinase, putative                                  | 1.43  | 1.16   | 3.56    |
| PF3D7_0605700 | conserved Plasmodium protein, unknown function                           | 1.76  | 4.93   | 18.97   |
| PF3D7_0605800 | DNA repair protein RAD50, putative (RAD50)                               | 0.45  | 15.16  | 23.37   |
| PF3D7_0605900 | long chain polyunsaturated fatty acid elongation enzyme, putative        | -0.29 | 124.95 | 115.26  |
| PF3D7_0606000 | conserved Plasmodium protein, unknown function                           | -1.07 | 292.80 | 157.36  |
| PF3D7_0606100 | RNA-binding protein, putative                                            | -0.68 | 200.47 | 141.33  |
| PF3D7_0606200 | ubiquitin-conjugating enzyme E2, putative                                | 0.34  | 64.52  | 92.16   |
| PF3D7_0606300 | conserved Plasmodium protein, unknown function                           | -2.62 | 17.73  | 3.22    |
| PF3D7_0606400 | conserved Plasmodium protein, unknown function                           | -0.13 | 0.89   | 0.93    |
| PF3D7_0606500 | polypyrimidine tract binding protein, putative                           | -1.18 | 98.09  | 49.00   |
| PF3D7_0606600 | conserved Plasmodium protein, unknown function                           | -1.43 | 157.31 | 65.78   |
| PF3D7_0606700 | coatamer alpha subunit, putative                                         | -1.62 | 158.96 | 58.49   |
| PF3D7_0606800 | probable protein, unknown function                                       | 0.00  | 37.18  | 41.88   |
| PF3D7_0606900 | glutaredoxin-like protein (GLP2)                                         | -1.14 | 71.17  | 36.53   |
| PF3D7_0607000 | translation initiation factor IF-2, putative                             | -0.83 | 436.50 | 277.08  |
| PF3D7_0607100 | MYND finger protein, putative                                            | 0.24  | 0.52   | 0.70    |
| PF3D7_0607200 | RING zinc finger protein, putative                                       | 0.75  | 5.11   | 9.73    |
| PF3D7_0607300 | uroporphyrinogen III decarboxylase (UROD)                                | 1.32  | 1.88   | 5.32    |
| PF3D7_0607400 | G-protein associated signal transduction protein, putative               | -1.21 | 21.28  | 10.35   |
| PF3D7_0607500 | para-hydroxybenzoate--polyprenyltransferase, putative (COQ2)             | -0.21 | 12.54  | 12.25   |
| PF3D7_0607600 | spindle assembly abnormal protein 6, putative (SAS6)                     | 0.64  | 19.70  | 34.73   |
| PF3D7_0607700 | conserved Plasmodium protein, unknown function                           | 0.43  | 17.37  | 26.40   |
| PF3D7_0607800 | GTP-binding protein, putative                                            | 2.20  | 2.53   | 13.19   |
| PF3D7_0607900 | conserved Plasmodium protein, unknown function                           | 1.56  | 3.97   | 13.20   |
| PF3D7_0608000 | diphthine methyltransferase, putative (DPH7)                             | -0.48 | 17.24  | 13.97   |
| PF3D7_0608100 | conserved Plasmodium protein, unknown function                           | -0.03 | 16.96  | 18.82   |
| PF3D7_0608200 | conserved Plasmodium protein, unknown function                           | 0.18  | 3.90   | 5.01    |
| PF3D7_0608300 | conserved Plasmodium protein, unknown function                           | 0.56  | 1.72   | 2.88    |
| PF3D7_0608310 | sorting assembly machinery 50 kDa subunit, putative (SAM50)              | -1.28 | 16.71  | 7.77    |
| PF3D7_0608400 | conserved Plasmodium protein, unknown function                           | 1.17  | 13.26  | 33.70   |
| PF3D7_0608500 | proteasome subunit alpha type-2, putative                                | -0.29 | 198.78 | 184.06  |
| PF3D7_0608600 | conserved Plasmodium protein, unknown function                           | 0.51  | 8.04   | 12.97   |
| PF3D7_0608700 | T-complex protein 1 subunit zeta (CCT6)                                  | -0.84 | 204.86 | 129.35  |
| PF3D7_0608800 | ornithine aminotransferase (OAT)                                         | 0.06  | 282.13 | 331.27  |
| PF3D7_0608900 | conserved Plasmodium protein, unknown function                           | -0.43 | 4.34   | 3.64    |
| PF3D7_0609000 | conserved Plasmodium protein, unknown function                           | -0.07 | 40.07  | 43.03   |
| PF3D7_0609100 | Zn <sup>2+</sup> or Fe <sup>2+</sup> permease                            | -1.12 | 133.98 | 69.82   |
| PF3D7_0609200 | citrate synthase-like protein, putative                                  | -1.66 | 9.21   | 3.28    |
| PF3D7_0609300 | conserved Plasmodium protein, unknown function                           | 0.92  | 2.55   | 5.46    |
| PF3D7_0609400 | mitochondrial cardiolipin synthase, putative (CLS)                       | 0.21  | 8.02   | 10.49   |
| PF3D7_0609500 | conserved Plasmodium protein, unknown function                           | 0.25  | 1.52   | 2.06    |
| PF3D7_0609600 | hypothetical protein                                                     | 0.70  | 0.78   | 1.45    |
| PF3D7_0609700 | conserved Plasmodium protein, unknown function                           | -0.28 | 134.83 | 125.46  |
| PF3D7_0609800 | palmitoyltransferase, putative (DHHC2)                                   | -0.64 | 45.77  | 33.05   |
| PF3D7_0609900 | conserved Plasmodium protein, unknown function                           | -0.38 | 16.69  | 14.53   |
| PF3D7_0610000 | mitochondrial ribosomal protein L19 precursor, putative                  | 1.14  | 8.68   | 21.70   |
| PF3D7_0610100 | pre-mRNA-splicing factor SLU7, putative (SLU7)                           | -0.44 | 68.89  | 57.27   |
| PF3D7_0610200 | conserved Plasmodium protein, unknown function                           | -0.76 | 40.05  | 26.70   |
| PF3D7_0610300 | unspecified product                                                      | -0.38 | 0.00   | 0.00    |
| PF3D7_0610400 | histone H3 (H3)                                                          | 4.65  | 251.30 | 7124.46 |
| PF3D7_0610500 | peptidyl-tRNA hydrolase PTRHD1, putative                                 | -1.60 | 31.55  | 11.74   |
| PF3D7_0610600 | calcium-dependent protein kinase 2 (CDPK2)                               | 0.25  | 15.34  | 20.67   |
| PF3D7_0610700 | conserved Plasmodium protein, unknown function                           | -1.60 | 47.60  | 17.64   |
| PF3D7_0610800 | transketolase (TK)                                                       | -0.83 | 343.86 | 219.05  |
| PF3D7_0610900 | transcription elongation factor SPT5, putative (SPT5)                    | -0.31 | 100.10 | 91.29   |
| PF3D7_0611000 | SNARE associated Golgi protein, putative                                 | 0.11  | 5.83   | 7.13    |
| PF3D7_0611100 | succinate dehydrogenase subunit 3, putative (SDH3)                       | 0.17  | 9.24   | 11.76   |
| PF3D7_0611200 | transcription factor with AP2 domain(s), putative (ApiAP2)               | 0.65  | 6.32   | 11.22   |
| PF3D7_0611300 | conserved Plasmodium protein, unknown function                           | 0.89  | 10.26  | 21.57   |
| PF3D7_0611400 | SWI/SNF-related matrix-associated actin-dependent regulator of chromatin | -0.95 | 31.35  | 18.26   |
| PF3D7_0611500 | conserved Plasmodium protein, unknown function                           | 1.39  | 2.34   | 6.96    |
| PF3D7_0611600 | conserved Plasmodium protein, unknown function                           | 0.36  | 36.81  | 53.43   |
| PF3D7_0611700 | 60S ribosomal protein L39 (RPL39)                                        | -2.23 | 459.19 | 110.32  |
| PF3D7_0611800 | conserved Plasmodium protein, unknown function                           | 0.30  | 35.49  | 49.37   |
| PF3D7_0611900 | lsm12, putative                                                          | 0.30  | 19.49  | 27.13   |
| PF3D7_0612000 | conserved Plasmodium protein, unknown function                           | -0.34 | 9.57   | 8.56    |
| PF3D7_0612100 | eukaryotic translation initiation factor 3 subunit L, putative (EIF3L)   | -1.75 | 174.38 | 58.41   |
| PF3D7_0612200 | leucine-rich repeat protein (LRR6)                                       | 1.12  | 24.15  | 59.35   |
| PF3D7_0612300 | conserved protein, unknown function                                      | -0.90 | 2.01   | 1.20    |



|                 |                                                                          |       |         |          |
|-----------------|--------------------------------------------------------------------------|-------|---------|----------|
| PF3D7_0612400   | conserved Plasmodium protein, unknown function                           | 0.54  | 2.93    | 4.85     |
| PF3D7_0612500   | conserved Plasmodium protein, unknown function                           | -1.00 | 17.93   | 10.12    |
| PF3D7_0612600   | PP-loop family protein, putative                                         | -0.26 | 33.73   | 31.88    |
| PF3D7_0612700   | 6-cysteine protein (P12)                                                 | 1.11  | 73.70   | 180.23   |
| PF3D7_0612800   | 6-cysteine protein (P12p)                                                | -1.97 | 22.70   | 6.53     |
| PF3D7_0612900   | nucleolar GTP-binding protein 1, putative                                | -1.54 | 233.04  | 90.75    |
| PF3D7_0613000.1 | conserved Plasmodium protein, unknown function                           | 0.81  | 11.69   | 23.27    |
| PF3D7_0613000.2 | conserved Plasmodium protein, unknown function                           | 0.80  | 11.87   | 23.49    |
| PF3D7_0613000.3 | conserved Plasmodium protein, unknown function                           | 0.76  | 12.99   | 24.95    |
| PF3D7_0613100   | conserved Plasmodium protein, unknown function                           | 0.53  | 13.04   | 21.30    |
| PF3D7_0613200   | conserved Plasmodium protein, unknown function                           | 0.65  | 3.30    | 5.96     |
| PF3D7_0613300   | rhoGTPase ROP14 (ROP14)                                                  | 1.35  | 22.22   | 63.81    |
| PF3D7_0613400   | apicoplast ribosomal protein L18 precursor, putative                     | 0.99  | 53.94   | 121.31   |
| PF3D7_0613500   | AP-3 complex subunit beta, putative                                      | 0.87  | 6.53    | 13.51    |
| PF3D7_0613600   | conserved Plasmodium protein, unknown function                           | 1.74  | 11.15   | 42.03    |
| PF3D7_0613700   | syntrophin binding protein, putative                                     | 0.24  | 19.21   | 25.54    |
| PF3D7_0613800   | transcription factor with AP2 domain(s) (ApiAP2)                         | 0.77  | 48.35   | 92.99    |
| PF3D7_0613900   | myosin E, putative (myoE)                                                | 2.71  | 61.80   | 456.01   |
| PF3D7_0614000   | thiamin-phosphate pyrophosphorylase, putative                            | 1.89  | 21.50   | 89.91    |
| PF3D7_0614100   | conserved Plasmodium protein, unknown function                           | 0.53  | 4.75    | 7.75     |
| PF3D7_0614200   | cytosolic Fe-S cluster assembly factor NARI1, putative (NARI1)           | -1.17 | 14.70   | 7.37     |
| PF3D7_0614300   | organic anion transporter                                                | -0.64 | 247.66  | 178.98   |
| PF3D7_0614400   | conserved protein, unknown function                                      | -1.80 | 174.71  | 56.52    |
| PF3D7_0614500   | 60S ribosomal protein L19 (RPL19)                                        | -0.59 | 1256.66 | 944.59   |
| PF3D7_0614600   | conserved Plasmodium protein, unknown function                           | -0.03 | 0.87    | 0.97     |
| PF3D7_0614700   | conserved Plasmodium protein, unknown function                           | 1.04  | 8.95    | 20.78    |
| PF3D7_0614800   | endonuclease III homologue, putative                                     | 1.15  | 16.76   | 41.90    |
| PF3D7_0614900   | conserved Plasmodium membrane protein, unknown function                  | 0.62  | 12.73   | 22.14    |
| PF3D7_0615000   | conserved Plasmodium protein, unknown function                           | -1.24 | 49.98   | 23.95    |
| PF3D7_0615100   | enoyl-acyl carrier reductase (ENR)                                       | 1.48  | 1.83    | 5.79     |
| PF3D7_0615200   | conserved Plasmodium protein, unknown function                           | 0.03  | 1.03    | 1.19     |
| PF3D7_0615300   | GPI-anchored wall transfer protein 1, putative (GWT1)                    | -0.11 | 2.96    | 3.10     |
| PF3D7_0615400   | ribonuclease, putative                                                   | -0.65 | 82.23   | 59.23    |
| PF3D7_0615500   | cdc2-related protein kinase 5 (CRK5)                                     | 0.57  | 26.80   | 44.96    |
| PF3D7_0615600   | conserved Plasmodium protein, unknown function                           | -1.47 | 47.70   | 19.42    |
| PF3D7_0615700   | RNA and export factor binding protein, putative                          | -0.59 | 66.63   | 50.11    |
| PF3D7_0615800   | conserved Plasmodium protein, unknown function                           | 0.52  | 6.80    | 10.98    |
| PF3D7_0615900   | conserved Plasmodium protein, unknown function                           | 0.67  | 13.53   | 24.29    |
| PF3D7_0616000   | pyridoxal kinase (PDXK)                                                  | 0.84  | 8.76    | 17.72    |
| PF3D7_0616100   | conserved Plasmodium protein, unknown function                           | 0.32  | 4.04    | 5.71     |
| PF3D7_0616200   | kinetochore protein NDC80, putative (NDC80)                              | 0.99  | 20.46   | 46.04    |
| PF3D7_0616300   | conserved Plasmodium protein, unknown function                           | -0.86 | 17.26   | 10.74    |
| PF3D7_0616400   | conserved Plasmodium protein, unknown function                           | -1.14 | 6.81    | 3.49     |
| PF3D7_0616500   | TRAP-like protein (TLP)                                                  | 0.72  | 0.93    | 1.73     |
| PF3D7_0616600   | conserved Plasmodium protein, unknown function                           | 0.84  | 5.65    | 11.43    |
| PF3D7_0616700   | ras GTPase, putative                                                     | 0.49  | 5.37    | 8.51     |
| PF3D7_0616800   | malate:quinone oxidoreductase, putative (MQO)                            | -0.21 | 23.30   | 22.76    |
| PF3D7_0616900   | conserved Plasmodium protein, unknown function                           | -0.79 | 19.01   | 12.43    |
| PF3D7_0617000   | mitochondrial import receptor subunit TOM40, putative (TOM40)            | -1.65 | 69.53   | 25.09    |
| PF3D7_0617100   | AP-2 complex subunit alpha, putative                                     | -0.84 | 64.82   | 41.03    |
| PF3D7_0617200   | conserved Plasmodium protein, unknown function                           | -0.66 | 495.40  | 354.08   |
| PF3D7_0617300   | conserved Plasmodium protein, unknown function                           | 0.36  | 34.40   | 50.03    |
| PF3D7_0617400   | erythrocyte membrane protein 1, PfEMP1 (VAR)                             | -0.13 | 6.82    | 7.02     |
| PF3D7_0617500   | rifin, pseudogene (RIF)                                                  | -0.83 | 24.83   | 15.73    |
| PF3D7_0617600   | stevor                                                                   | 2.38  | 2.51    | 14.94    |
| PF3D7_0617700   | rifin (RIF)                                                              | -0.51 | 5.91    | 4.70     |
| PF3D7_0617800   | histone H2A (H2A)                                                        | 5.09  | 405.44  | 15627.50 |
| PF3D7_0617900   | histone H3 variant, putative (H3.3)                                      | 1.10  | 1054.09 | 2559.69  |
| PF3D7_0618000   | conserved Plasmodium membrane protein, unknown function                  | 1.93  | 29.29   | 126.48   |
| PF3D7_0618100   | conserved Plasmodium protein, unknown function                           | 0.53  | 7.66    | 12.46    |
| PF3D7_0618200   | conserved Plasmodium protein, unknown function                           | -1.17 | 144.96  | 72.96    |
| PF3D7_0618300   | 60S ribosomal protein L27a, putative                                     | -1.07 | 1262.35 | 677.85   |
| PF3D7_0618400   | conserved Plasmodium membrane protein, unknown function                  | 0.54  | 0.34    | 0.56     |
| PF3D7_0618500   | malate dehydrogenase (MDH)                                               | 0.71  | 20.50   | 37.86    |
| PF3D7_0618600   | rhomboid protease ROM10 (ROM10)                                          | 0.60  | 7.06    | 12.12    |
| PF3D7_0618700   | trafficking protein particle complex subunit 6A, putative                | -1.08 | 17.66   | 9.44     |
| PF3D7_0618800   | conserved Plasmodium protein, unknown function                           | 0.56  | 1.88    | 3.14     |
| PF3D7_0618900.1 | phosphatidylinositol N-acetylglucosaminyltransferase subunit GPI1 (GPI1) | 0.37  | 6.75    | 9.85     |
| PF3D7_0618900.2 | phosphatidylinositol N-acetylglucosaminyltransferase subunit GPI1 (GPI1) | 0.32  | 7.51    | 10.57    |
| PF3D7_0619000.1 | conserved Plasmodium protein, unknown function                           | -0.29 | 48.35   | 44.66    |
| PF3D7_0619000.2 | conserved Plasmodium protein, unknown function                           | -0.29 | 48.32   | 44.63    |
| PF3D7_0619100   | conserved Plasmodium protein, unknown function                           | -0.92 | 10.82   | 6.46     |
| PF3D7_0619200   | conserved Plasmodium protein, unknown function                           | -0.85 | 83.45   | 52.44    |
| PF3D7_0619300   | conserved Plasmodium protein, unknown function                           | 0.84  | 1.75    | 3.53     |
| PF3D7_0619400   | cell division cycle protein 48 homologue, putative                       | -0.31 | 224.22  | 204.68   |
| PF3D7_0619500   | acyl-CoA synthetase (ACS12)                                              | -1.28 | 20.18   | 9.40     |
| PF3D7_0619600   | conserved Plasmodium protein, unknown function                           | -0.14 | 2.59    | 2.65     |
| PF3D7_0619700   | conserved Plasmodium protein, unknown function                           | 0.21  | 6.80    | 8.85     |
| PF3D7_0619800   | conserved Plasmodium membrane protein, unknown function                  | -0.69 | 13.33   | 9.35     |
| PF3D7_0619900   | splicing factor 3A subunit 2, putative (SF3A2)                           | 0.25  | 43.49   | 58.25    |
| PF3D7_0620000   | conserved Plasmodium protein, unknown function                           | 2.46  | 0.59    | 3.74     |
| PF3D7_0620100   | conserved Plasmodium protein, unknown function                           | 1.11  | 5.81    | 14.23    |
| PF3D7_0620200   | conserved Plasmodium protein, unknown function                           | 0.62  | 1.13    | 1.99     |
| PF3D7_0620300   | conserved Plasmodium protein, unknown function                           | 0.17  | 4.46    | 5.66     |
| PF3D7_0620400   | merozoite surface protein 10 (MSP10)                                     | 1.92  | 12.14   | 52.02    |
| PF3D7_0620500   | cleavage stimulation factor subunit 1, putative                          | -0.77 | 60.48   | 40.00    |
| PF3D7_0620600   | conserved Plasmodium protein, unknown function                           | -1.48 | 4.00    | 1.61     |
| PF3D7_0620700   | DnaJ protein, putative                                                   | 0.81  | 8.80    | 17.40    |
| PF3D7_0620800   | tRNA Alanine                                                             | 1.62  | 0.00    | 0.81     |
| PF3D7_0620900   | tRNA Leucine                                                             | 1.74  | 0.55    | 2.89     |
| PF3D7_0621000   | conserved Plasmodium protein, unknown function                           | -0.37 | 9.20    | 8.06     |
| PF3D7_0621100   | conserved Plasmodium protein, unknown function                           | 0.71  | 34.92   | 64.58    |
| PF3D7_0621200   | pyridoxine biosynthesis protein PDX1 (PDX1)                              | 0.01  | 233.89  | 266.20   |
| PF3D7_0621300   | mRNA binding Pumilio-homology domain protein, putative                   | -2.36 | 109.07  | 23.92    |
| PF3D7_0621400   | Pf77 protein (ALV7)                                                      | 0.49  | 15.98   | 25.37    |
| PF3D7_0621500   | ribonuclease P/MRP protein subunit RPP1, putative (RPP1)                 | -0.36 | 4.36    | 3.83     |
| PF3D7_0621600   | tRNA Serine                                                              | -0.11 | 1.09    | 1.19     |
| PF3D7_0621700   | conserved Plasmodium protein, unknown function                           | -0.15 | 4.76    | 4.85     |

|                 |                                                                                                    |       |         |         |
|-----------------|----------------------------------------------------------------------------------------------------|-------|---------|---------|
| PF3D7_0621800   | nascent polypeptide associated complex alpha chain, putative                                       | -0.46 | 771.84  | 632.61  |
| PF3D7_0621900   | signal recognition particle subunit SRP68, putative (SRP68)                                        | -1.59 | 148.80  | 55.78   |
| PF3D7_0622000   | conserved Plasmodium protein, unknown function                                                     | 0.01  | 2.38    | 2.71    |
| PF3D7_0622100   | conserved Plasmodium protein, unknown function                                                     | -0.27 | 5.45    | 5.12    |
| PF3D7_0622200   | radical SAM protein, putative                                                                      | -1.50 | 141.41  | 56.53   |
| PF3D7_0622300   | vacuolar transporter chaperone, putative                                                           | -0.11 | 3.41    | 3.56    |
| PF3D7_0622400   | conserved Apicomplexan protein, unknown function                                                   | 1.37  | 5.96    | 17.48   |
| PF3D7_0622500   | RNA methyltransferase, putative                                                                    | -0.39 | 7.47    | 6.45    |
| PF3D7_0622600   | conserved Plasmodium protein, unknown function                                                     | 0.82  | 12.39   | 24.78   |
| PF3D7_0622700   | conserved Plasmodium membrane protein, unknown function                                            | -1.03 | 8.87    | 4.92    |
| PF3D7_0622800   | leucine-tRNA ligase, putative                                                                      | -1.77 | 229.33  | 76.05   |
| PF3D7_0622900   | transcription factor with AP2 domain(s), putative (ApiAP2)                                         | -0.67 | 142.68  | 101.49  |
| PF3D7_0623000   | chorismate synthase (CS)                                                                           | 0.44  | 20.76   | 31.82   |
| PF3D7_0623100   | nuclear polyadenylated RNA-binding protein NAB2, putative (NAB2)                                   | -0.90 | 248.77  | 150.14  |
| PF3D7_0623200   | ferredoxin-NADP reductase (FNR)                                                                    | -1.42 | 55.46   | 23.45   |
| PF3D7_0623300   | EGF-like membrane protein, putative                                                                | 0.46  | 19.63   | 30.48   |
| PF3D7_0623400   | RNA-binding protein mei2 homologue, putative                                                       | 0.10  | 1.45    | 1.76    |
| PF3D7_0623500   | superoxide dismutase [Fe] (SOD2)                                                                   | -0.58 | 36.52   | 27.52   |
| PF3D7_0623600   | transcription or splicing factor-like protein, putative                                            | -0.79 | 93.96   | 61.37   |
| PF3D7_0623700   | ATP dependent DEAD-box helicase, putative                                                          | 0.83  | 5.19    | 10.44   |
| PF3D7_0623800   | tyrosine kinase-like protein, putative (TKL4)                                                      | -0.63 | 352.28  | 257.84  |
| PF3D7_0623900   | ribonuclease H2 subunit A, putative                                                                | 0.72  | 16.02   | 29.74   |
| PF3D7_0624000   | hexokinase (HK)                                                                                    | -0.98 | 398.55  | 228.32  |
| PF3D7_0624100   | conserved Plasmodium protein, unknown function                                                     | 0.20  | 11.16   | 14.45   |
| PF3D7_0624200   | conserved Plasmodium protein, unknown function                                                     | 0.68  | 16.33   | 29.63   |
| PF3D7_0624300   | conserved Plasmodium protein, unknown function                                                     | 1.65  | 2.57    | 9.22    |
| PF3D7_0624400   | conserved Plasmodium protein, unknown function                                                     | -0.43 | 13.20   | 11.08   |
| PF3D7_0624500   | anaphase promoting complex subunit, putative                                                       | 0.59  | 56.08   | 95.50   |
| PF3D7_0624600   | SNF2 helicase, putative (ISW1)                                                                     | -0.24 | 300.81  | 286.72  |
| PF3D7_0624700   | N-acetylglucosaminylphosphatidylinositol deacetylase, putative                                     | 0.41  | 5.75    | 8.64    |
| PF3D7_0624800   | conserved Plasmodium protein, unknown function                                                     | 0.22  | 1.10    | 1.46    |
| PF3D7_0624900   | conserved Plasmodium protein, unknown function                                                     | 0.80  | 1.57    | 3.12    |
| PF3D7_0625000.1 | sphingomyelin synthase 1, putative (SMS1)                                                          | 1.72  | 9.16    | 34.14   |
| PF3D7_0625000.2 | sphingomyelin synthase 1, putative (SMS1)                                                          | 1.68  | 9.45    | 34.16   |
| PF3D7_0625100   | sphingomyelin synthase 2, putative (SMS2)                                                          | 0.22  | 1.05    | 1.38    |
| PF3D7_0625200   | conserved Plasmodium protein, unknown function                                                     | 1.69  | 1.93    | 7.09    |
| PF3D7_0625300   | DNA polymerase 1, putative                                                                         | 0.70  | 9.49    | 17.41   |
| PF3D7_0625400   | conserved Plasmodium protein, unknown function                                                     | -1.60 | 157.67  | 58.53   |
| PF3D7_0625500   | conserved Plasmodium membrane protein, unknown function                                            | -2.18 | 6.63    | 1.63    |
| PF3D7_0625600   | poly(A) polymerase PAP, putative                                                                   | -3.04 | 85.14   | 11.69   |
| PF3D7_0625700   | conserved Plasmodium protein, unknown function                                                     | 0.26  | 15.99   | 21.66   |
| PF3D7_0625800   | conserved Plasmodium protein, unknown function                                                     | -1.52 | 9.30    | 3.67    |
| PF3D7_0625900   | conserved Plasmodium protein, unknown function                                                     | 0.24  | 0.62    | 0.83    |
| PF3D7_0626000   | conserved Plasmodium protein, unknown function                                                     | -1.68 | 30.89   | 10.88   |
| PF3D7_0626100   | oxidoreductase, short-chain dehydrogenase family, putative                                         | 0.19  | 10.50   | 13.57   |
| PF3D7_0626200   | conserved Plasmodium protein, unknown function                                                     | -1.69 | 13.44   | 4.70    |
| PF3D7_0626300   | 3-oxoacyl-acyl-carrier protein synthase I/II (FabB/FabF)                                           | 0.41  | 5.50    | 8.25    |
| PF3D7_0626400   | Sec14 domain containing protein                                                                    | 0.63  | 9.06    | 15.85   |
| PF3D7_0626500   | conserved Plasmodium protein, unknown function                                                     | 0.57  | 0.76    | 1.29    |
| PF3D7_0626600   | conserved Plasmodium protein, unknown function                                                     | -1.68 | 6.49    | 2.27    |
| PF3D7_0626700   | conserved protein, unknown function                                                                | -1.12 | 131.54  | 68.57   |
| PF3D7_0626800   | pyruvate kinase (PyrK)                                                                             | -0.41 | 1309.30 | 1112.29 |
| PF3D7_0626840   | small nucleolar RNA snoR35                                                                         | -0.30 | 16.92   | 15.58   |
| PF3D7_0626900   | mitochondrial ribosomal protein L46 precursor, putative                                            | -0.20 | 6.39    | 6.29    |
| PF3D7_0627000   | conserved Plasmodium protein, unknown function                                                     | 1.35  | 1.48    | 4.39    |
| PF3D7_0627100   | ankyrin-repeat protein, putative                                                                   | -0.46 | 187.22  | 153.86  |
| PF3D7_0627200   | myosin light chain, putative                                                                       | 0.09  | 4.80    | 5.80    |
| PF3D7_0627300   | E3 ubiquitin-protein ligase RNF5, putative (RNF5)                                                  | -0.47 | 260.23  | 212.04  |
| PF3D7_0627400   | mitochondrial import inner membrane translocase subunit TIM22, putative (TIM22)                    | -0.79 | 10.58   | 6.90    |
| PF3D7_0627500   | protein DJ-1 (DJ1)                                                                                 | -0.93 | 404.73  | 239.70  |
| PF3D7_0627600   | conserved Plasmodium protein, unknown function                                                     | -0.74 | 8.22    | 5.58    |
| PF3D7_0627700   | transportin                                                                                        | -1.27 | 213.51  | 99.76   |
| PF3D7_0627800   | acetyl-CoA synthetase, putative (ACS)                                                              | -0.88 | 85.03   | 52.31   |
| PF3D7_0627900   | ribonuclease P protein subunit p29, putative (POP4)                                                | -0.86 | 52.91   | 33.02   |
| PF3D7_0628000   | 6-pyruvoyltetrahydropterin synthase (PTPS)                                                         | 0.46  | 8.11    | 12.66   |
| PF3D7_0628100   | HECT-domain (ubiquitin-transferase), putative                                                      | 2.02  | 16.37   | 74.76   |
| PF3D7_0628200   | protein kinase PK4 (PK4)                                                                           | -1.00 | 166.72  | 94.09   |
| PF3D7_0628300   | choline/ethanolaminephosphotransferase, putative (CEPT)                                            | 2.36  | 166.99  | 965.44  |
| PF3D7_0628400   | conserved Plasmodium membrane protein, unknown function                                            | 1.53  | 3.95    | 12.94   |
| PF3D7_0628500   | conserved Plasmodium protein, unknown function                                                     | -0.95 | 4.55    | 2.64    |
| PF3D7_0628600   | conserved Plasmodium protein, unknown function                                                     | -1.36 | 63.79   | 28.06   |
| PF3D7_0628700   | conserved Plasmodium protein, unknown function                                                     | -0.37 | 5.33    | 4.67    |
| PF3D7_0628800   | glutamyl-tRNA(Gln) amidotransferase subunit B, putative (GATB)                                     | 1.12  | 4.61    | 11.33   |
| PF3D7_0628900   | RAP protein, putative                                                                              | 0.91  | 1.40    | 2.98    |
| PF3D7_0629000   | conserved protein, unknown function                                                                | -1.03 | 0.54    | 0.29    |
| PF3D7_0629100   | nicotinate phosphoribosyltransferase, putative (NAPRT)                                             | -0.65 | 43.58   | 31.30   |
| PF3D7_0629200   | DnaJ protein, putative                                                                             | -0.14 | 127.70  | 131.01  |
| PF3D7_0629300   | phospholipase, putative (PL)                                                                       | 3.09  | 4.74    | 45.68   |
| PF3D7_0629400   | RNA-binding protein, putative                                                                      | 0.78  | 14.83   | 28.67   |
| PF3D7_0629500   | amino acid transporter, putative                                                                   | -0.10 | 84.25   | 89.02   |
| PF3D7_0629600   | conserved Plasmodium protein, unknown function                                                     | -0.90 | 44.45   | 26.84   |
| PF3D7_0629700   | SET domain protein, putative (SET1)                                                                | -0.20 | 34.87   | 34.38   |
| PF3D7_0629800   | cullin-like protein, putative                                                                      | -1.34 | 70.17   | 31.31   |
| PF3D7_0629900   | sec14-like cytosolic factor or phosphatidylinositol/phosphatidylcholine transfer protein, putative | -1.38 | 152.69  | 66.27   |
| PF3D7_0630000   | CPW-WPC family protein                                                                             | 1.99  | 0.16    | 0.81    |
| PF3D7_0630100   | conserved Plasmodium protein, unknown function                                                     | 1.60  | 2.69    | 9.24    |
| PF3D7_0630200   | secreted ookinete protein, putative (PSOP6)                                                        | 2.54  | 1.37    | 9.32    |
| PF3D7_0630300   | DNA polymerase epsilon, catalytic subunit a, putative                                              | 0.67  | 5.09    | 9.14    |
| PF3D7_0630400   | conserved Plasmodium protein, unknown function                                                     | -0.67 | 13.23   | 9.36    |
| PF3D7_0630500   | ribosome biogenesis protein YTM1, putative (YTM1)                                                  | -1.51 | 30.23   | 12.02   |
| PF3D7_0630600   | conserved Plasmodium protein, unknown function                                                     | -0.42 | 36.15   | 30.51   |
| PF3D7_0630700   | bifunctional methylenetetrahydrofolate dehydrogenase/cyclohydrolase, putative                      | -0.90 | 6.57    | 3.97    |
| PF3D7_0630800   | conserved Plasmodium protein, unknown function                                                     | 1.41  | 1.07    | 3.25    |
| PF3D7_0630900   | ATP-dependent RNA helicase HAS1 (HAS1)                                                             | -1.40 | 94.58   | 40.56   |
| PF3D7_0631000   | tetrapeptide repeat protein, putative                                                              | 0.34  | 20.52   | 29.37   |
| PF3D7_0631100   | Plasmodium exported protein (PHISTb), unknown function                                             | 1.48  | 0.53    | 1.70    |
| PF3D7_0631200   | erythrocyte membrane protein 1 (PEMP1), pseudogene (VAR)                                           | -1.02 | 1.96    | 1.08    |
| PF3D7_0631300   | exported protein family 1 (EPF1)                                                                   | -0.51 | 10.87   | 8.63    |

|               |                                                                    |       |         |         |
|---------------|--------------------------------------------------------------------|-------|---------|---------|
| PF3D7_0631400 | Pfmc-2TM Maurer's cleft two transmembrane protein (MC-2TM)         | 0.10  | 1.51    | 1.85    |
| PF3D7_0631500 | exported protein family 3 (EPF3)                                   | -4.55 | 46.61   | 2.22    |
| PF3D7_0631600 | exported protein family 4 (EPF4)                                   | -4.99 | 122.19  | 4.32    |
| PF3D7_0631700 | rifin, pseudogene                                                  | -1.56 | 0.50    | 0.18    |
| PF3D7_0631800 | rifin (RIF)                                                        | 1.95  | 0.00    | 0.08    |
| PF3D7_0631900 | stevor                                                             | 0.95  | 0.12    | 0.30    |
| PF3D7_0632000 | rifin (RIF)                                                        | -0.38 | 0.00    | 0.00    |
| PF3D7_0632100 | rifin (RIF)                                                        | -3.18 | 0.14    | 0.00    |
| PF3D7_0632200 | rifin (RIF)                                                        | 0.21  | 0.10    | 0.14    |
| PF3D7_0632300 | rifin (RIF)                                                        | 0.43  | 0.23    | 0.36    |
| PF3D7_0632400 | rifin (RIF)                                                        | -2.90 | 1.34    | 0.19    |
| PF3D7_0632500 | erythrocyte membrane protein 1, PfEMP1 (VAR)                       | -0.27 | 2.41    | 2.27    |
| PF3D7_0632600 | rifin, pseudogene (RIF)                                            | 0.23  | 0.79    | 1.06    |
| PF3D7_0632700 | rifin (RIF)                                                        | 0.19  | 4.36    | 5.62    |
| PF3D7_0632800 | erythrocyte membrane protein 1, PfEMP1 (VAR)                       | 0.57  | 3.66    | 6.15    |
| PF3D7_0700100 | erythrocyte membrane protein 1, PfEMP1 (VAR)                       | 0.05  | 0.44    | 0.52    |
| PF3D7_0700200 | rifin (RIF)                                                        | -1.38 | 0.02    | 0.00    |
| PF3D7_0700300 | rifin (RIF)                                                        | 3.08  | 0.00    | 0.20    |
| PF3D7_0700400 | stevor                                                             | -0.38 | 0.00    | 0.00    |
| PF3D7_0700500 | rifin (RIF)                                                        | 1.43  | 0.06    | 0.24    |
| PF3D7_0700600 | Plasmodium exported protein, unknown function, pseudogene          | -0.38 | 0.00    | 0.00    |
| PF3D7_0700700 | stevor, pseudogene                                                 | 1.62  | 0.00    | 0.07    |
| PF3D7_0700800 | Pfmc-2TM Maurer's cleft two transmembrane protein (MC-2TM)         | 2.62  | 0.26    | 1.99    |
| PF3D7_0700900 | RESA-like protein, pseudogene                                      | 0.53  | 0.15    | 0.26    |
| PF3D7_0701000 | erythrocyte membrane protein 1 (PfEMP1), pseudogene                | 2.54  | 0.42    | 2.83    |
| PF3D7_0701100 | rifin (RIF)                                                        | -0.44 | 8.73    | 7.26    |
| PF3D7_0701200 | rifin, pseudogene (RIF)                                            | 2.43  | 0.00    | 0.13    |
| PF3D7_0701300 | rifin, pseudogene (RIF)                                            | 0.33  | 0.60    | 0.86    |
| PF3D7_0701400 | exported protein family 4, pseudogene (EPF4)                       | -3.26 | 137.95  | 16.25   |
| PF3D7_0701500 | exported protein family 3 (EPF3)                                   | -2.80 | 91.31   | 14.74   |
| PF3D7_0701600 | Pfmc-2TM Maurer's cleft two transmembrane protein (MC-2TM)         | 0.48  | 0.82    | 1.32    |
| PF3D7_0701700 | exported protein family 1 (EPF1)                                   | -1.12 | 12.22   | 6.36    |
| PF3D7_0701800 | rifin (RIF)                                                        | 2.35  | 0.16    | 1.02    |
| PF3D7_0701900 | Plasmodium exported protein, unknown function                      | 1.53  | 119.41  | 390.48  |
| PF3D7_0702000 | Plasmodium exported protein (hyp12), unknown function              | -0.33 | 437.28  | 393.43  |
| PF3D7_0702100 | Plasmodium exported protein (PHISTb), unknown function, pseudogene | 0.87  | 76.47   | 157.70  |
| PF3D7_0702200 | lysophospholipase, putative                                        | 0.31  | 120.89  | 169.16  |
| PF3D7_0702300 | sporozoite threonine and asparagine-rich protein (STARP)           | -2.26 | 469.83  | 110.96  |
| PF3D7_0702400 | small exported membrane protein 1 (SEMP1)                          | -2.50 | 1048.39 | 209.63  |
| PF3D7_0702500 | Plasmodium exported protein, unknown function                      | -2.43 | 734.51  | 154.00  |
| PF3D7_0702600 | chitinase precursor fragment, truncated                            | 2.33  | 3.65    | 21.19   |
| PF3D7_0702700 | tRNA Alanine                                                       | 0.62  | 0.00    | 0.27    |
| PF3D7_0702800 | tRNA Tyrosine                                                      | -1.96 | 0.53    | 0.00    |
| PF3D7_0702900 | centrin, putative                                                  | -1.32 | 20.74   | 9.32    |
| PF3D7_0703000 | conserved Plasmodium protein, unknown function                     | -1.33 | 4.90    | 2.20    |
| PF3D7_0703100 | conserved Plasmodium protein, unknown function                     | -2.04 | 15.35   | 4.20    |
| PF3D7_0703200 | conserved Plasmodium protein, unknown function                     | 0.02  | 22.44   | 25.76   |
| PF3D7_0703300 | conserved Plasmodium protein, unknown function                     | 0.81  | 17.17   | 33.99   |
| PF3D7_0703400 | conserved Plasmodium protein, unknown function                     | -0.18 | 5.57    | 5.54    |
| PF3D7_0703500 | erythrocyte membrane-associated antigen                            | -1.16 | 323.75  | 163.41  |
| PF3D7_0703600 | conserved Plasmodium protein, unknown function                     | 1.28  | 32.59   | 89.35   |
| PF3D7_0703700 | conserved Plasmodium protein, unknown function                     | -1.52 | 185.44  | 73.26   |
| PF3D7_0703800 | conserved Plasmodium protein, unknown function                     | -0.07 | 4.67    | 5.01    |
| PF3D7_0703900 | conserved Plasmodium membrane protein, unknown function            | -2.09 | 50.34   | 13.37   |
| PF3D7_0704000 | conserved Plasmodium membrane protein, unknown function            | -1.42 | 12.23   | 5.18    |
| PF3D7_0704100 | conserved Plasmodium membrane protein, unknown function            | 0.65  | 16.85   | 29.96   |
| PF3D7_0704200 | tRNA m5C-methyltransferase, putative                               | -1.91 | 35.74   | 10.71   |
| PF3D7_0704300 | conserved Plasmodium membrane protein, unknown function            | 0.99  | 30.87   | 69.38   |
| PF3D7_0704400 | phosphoinositide-binding protein, putative                         | 0.00  | 22.76   | 25.78   |
| PF3D7_0704500 | serine/threonine protein kinase, putative                          | -0.43 | 26.47   | 22.18   |
| PF3D7_0704600 | E3 ubiquitin-protein ligase (UT)                                   | -0.44 | 120.47  | 100.27  |
| PF3D7_0704700 | phosphopantetheine adenyltransferase, putative (PPAT)              | -1.26 | 12.62   | 5.97    |
| PF3D7_0704800 | conserved Plasmodium protein, unknown function                     | 0.91  | 8.64    | 18.35   |
| PF3D7_0704900 | peptide chain release factor, putative                             | 0.24  | 12.19   | 16.29   |
| PF3D7_0705000 | methyltransferase, putative                                        | -1.29 | 84.52   | 38.97   |
| PF3D7_0705100 | conserved Plasmodium protein, unknown function                     | 0.19  | 13.83   | 17.81   |
| PF3D7_0705200 | conserved Plasmodium protein, unknown function                     | 0.04  | 0.93    | 1.08    |
| PF3D7_0705300 | origin recognition complex subunit 2, putative (ORC2)              | 0.96  | 14.72   | 32.24   |
| PF3D7_0705400 | DNA replication licensing factor MCM7 (MCM7)                       | 0.73  | 48.50   | 90.66   |
| PF3D7_0705500 | inositol-phosphate phosphatase, putative                           | -0.67 | 266.70  | 189.42  |
| PF3D7_0705600 | RNA helicase, putative                                             | 0.07  | 6.31    | 7.51    |
| PF3D7_0705700 | 40S ribosomal protein S29, putative                                | -1.48 | 213.00  | 86.47   |
| PF3D7_0705800 | cysteine-rich secretory protein, putative                          | 0.42  | 2.69    | 4.09    |
| PF3D7_0705900 | ATP synthase subunit C, putative                                   | 0.66  | 39.03   | 69.71   |
| PF3D7_0706000 | importin-7, putative                                               | -1.16 | 141.05  | 71.41   |
| PF3D7_0706100 | conserved Plasmodium protein, unknown function                     | 0.21  | 7.63    | 9.97    |
| PF3D7_0706200 | conserved Plasmodium protein, unknown function                     | -0.16 | 4.02    | 4.08    |
| PF3D7_0706300 | conserved Plasmodium protein, unknown function                     | 1.18  | 27.86   | 71.25   |
| PF3D7_0706400 | 60S ribosomal protein L37 (RPL37)                                  | -1.36 | 568.98  | 251.00  |
| PF3D7_0706500 | conserved Plasmodium protein, unknown function                     | -1.13 | 273.42  | 140.88  |
| PF3D7_0706600 | conserved Plasmodium protein, unknown function                     | 0.44  | 0.63    | 0.97    |
| PF3D7_0706700 | DNA mismatch repair protein MSH2, putative (MSH2-2)                | 0.16  | 1.82    | 2.30    |
| PF3D7_0706800 | tRNA Threonine                                                     | -1.57 | 4.60    | 1.60    |
| PF3D7_0706900 | tRNA Histidine                                                     | -1.38 | 0.31    | 0.00    |
| PF3D7_0707000 | tRNA Lysine                                                        | -1.38 | 0.92    | 0.27    |
| PF3D7_0707100 | tRNA Lysine                                                        | -0.38 | 0.00    | 0.00    |
| PF3D7_0707200 | conserved Plasmodium protein, unknown function                     | 0.29  | 9.69    | 13.38   |
| PF3D7_0707300 | rhoptyr-associated membrane antigen (RAMA)                         | 1.50  | 505.61  | 1610.92 |
| PF3D7_0707400 | AAA family ATPase, putative                                        | 0.03  | 25.83   | 29.83   |
| PF3D7_0707420 | nucleolar RNA snoR36                                               | -0.34 | 11.14   | 9.97    |
| PF3D7_0707500 | conserved Plasmodium protein, unknown function                     | 0.12  | 19.12   | 23.41   |
| PF3D7_0707600 | conserved Plasmodium protein, unknown function                     | -0.57 | 42.64   | 32.54   |
| PF3D7_0707700 | E3 ubiquitin-protein ligase, putative                              | -0.55 | 124.53  | 96.05   |
| PF3D7_0707800 | RAP protein, putative                                              | 0.71  | 7.91    | 14.62   |
| PF3D7_0707900 | ribosomal protein S8e, putative                                    | -0.53 | 185.06  | 145.18  |
| PF3D7_0708000 | cytoskeleton associated protein, putative                          | 0.92  | 6.78    | 14.54   |
| PF3D7_0708100 | DNA-directed RNA polymerase 2 8.2 kDa polypeptide, putative        | -1.62 | 125.87  | 46.22   |
| PF3D7_0708200 | conserved Plasmodium protein, unknown function                     | -0.75 | 1.86    | 1.25    |

|               |                                                                        |       |         |         |
|---------------|------------------------------------------------------------------------|-------|---------|---------|
| PF3D7_0708300 | EKC/KEOPS complex subunit BUD32 (BUD32)                                | -1.06 | 37.46   | 20.34   |
| PF3D7_0708400 | heat shock protein 90 (HSP90)                                          | 0.25  | 1484.50 | 1989.03 |
| PF3D7_0708500 | heat shock protein 86 family protein                                   | 0.07  | 32.47   | 38.62   |
| PF3D7_0708600 | inner membrane complex protein 1d, putative (IMC1d)                    | -0.08 | 2.30    | 2.47    |
| PF3D7_0708700 | Cg8 protein                                                            | 0.12  | 63.58   | 78.22   |
| PF3D7_0708800 | heat shock protein 110 (HSP110c)                                       | -0.71 | 527.55  | 363.40  |
| PF3D7_0708900 | Cg3 protein                                                            | -1.60 | 58.93   | 21.88   |
| PF3D7_0709000 | chloroquine resistance transporter (CRT)                               | -2.00 | 227.41  | 64.16   |
| PF3D7_0709050 | small nucleolar RNA                                                    | 0.47  | 0.14    | 0.25    |
| PF3D7_0709100 | Cg1 protein                                                            | 0.63  | 20.52   | 35.78   |
| PF3D7_0709200 | glutaredoxin-like protein (GLP3)                                       | -0.87 | 18.00   | 11.09   |
| PF3D7_0709300 | Cg2 protein (CG2)                                                      | -2.12 | 48.54   | 12.59   |
| PF3D7_0709400 | Cg7 protein                                                            | 0.31  | 8.29    | 11.62   |
| PF3D7_0709500 | conserved Plasmodium protein, unknown function                         | 0.11  | 10.54   | 12.90   |
| PF3D7_0709600 | ribonucleases P/MRP protein subunit POP1, putative (POP1)              | -1.23 | 45.42   | 21.83   |
| PF3D7_0709700 | lysophospholipase, putative                                            | -0.57 | 57.16   | 43.63   |
| PF3D7_0709800 | conserved protein, unknown function                                    | -0.28 | 15.51   | 14.39   |
| PF3D7_0709900 | conserved Plasmodium membrane protein, unknown function                | 1.22  | 2.71    | 7.14    |
| PF3D7_0710000 | conserved Plasmodium protein, unknown function                         | -0.12 | 8.45    | 8.78    |
| PF3D7_0710100 | conserved Plasmodium protein, unknown function                         | -1.50 | 39.15   | 15.66   |
| PF3D7_0710200 | conserved Plasmodium protein, unknown function                         | 1.05  | 12.36   | 28.92   |
| PF3D7_0710300 | conserved Plasmodium membrane protein, unknown function                | 0.06  | 14.79   | 17.45   |
| PF3D7_0710400 | DNA repair protein RAD14, putative (RAD14)                             | -1.24 | 12.59   | 6.02    |
| PF3D7_0710500 | conserved Plasmodium protein, unknown function                         | 0.81  | 2.97    | 5.94    |
| PF3D7_0710600 | 60S ribosomal protein L34 (RPL34)                                      | -0.57 | 564.19  | 429.35  |
| PF3D7_0710700 | conserved Plasmodium protein, unknown function                         | -0.94 | 113.44  | 66.54   |
| PF3D7_0710800 | conserved Plasmodium protein, unknown function                         | -1.16 | 38.86   | 19.68   |
| PF3D7_0710900 | 50S ribosomal protein L1, mitochondrial, putative (RPL1)               | -1.54 | 41.85   | 16.23   |
| PF3D7_0711000 | AAA family ATPase, CDC48 subfamily (Cdc48)                             | 0.36  | 21.05   | 30.45   |
| PF3D7_0711100 | conserved Plasmodium membrane protein, unknown function                | -2.49 | 61.96   | 12.42   |
| PF3D7_0711200 | conserved Plasmodium protein, unknown function                         | -1.11 | 5.52    | 2.89    |
| PF3D7_0711300 | conserved Plasmodium protein, unknown function                         | -1.45 | 37.46   | 15.48   |
| PF3D7_0711400 | histone deacetylase complex subunit SAP18, putative (SAP18)            | 0.85  | 7.74    | 15.73   |
| PF3D7_0711500 | regulator of chromosome condensation, putative                         | -1.27 | 102.45  | 47.95   |
| PF3D7_0711600 | Plasmodium RNA of unknown function RUF6-1                              | -3.55 | 1.32    | 0.00    |
| PF3D7_0711700 | erythrocyte membrane protein 1, PfEMP1 (VAR)                           | -1.66 | 4.12    | 1.47    |
| PF3D7_0711800 | Plasmodium RNA of unknown function RUF6-2                              | -0.38 | 0.00    | 0.00    |
| PF3D7_0711900 | rifin, pseudogene (RIF)                                                | 2.95  | 0.00    | 0.16    |
| PF3D7_0712000 | erythrocyte membrane protein 1, PfEMP1 (VAR)                           | -1.08 | 2.93    | 1.56    |
| PF3D7_0712100 | Plasmodium RNA of unknown function RUF6-12                             | -0.38 | 0.00    | 0.00    |
| PF3D7_0712200 | rifin, pseudogene (RIF)                                                | 0.21  | 0.02    | 0.04    |
| PF3D7_0712300 | erythrocyte membrane protein 1, PfEMP1 (VAR)                           | -0.63 | 1.27    | 0.92    |
| PF3D7_0712400 | erythrocyte membrane protein 1, PfEMP1 (VAR)                           | -1.70 | 1.70    | 0.59    |
| PF3D7_0712500 | rifin, pseudogene (RIF)                                                | 2.79  | 0.00    | 0.14    |
| PF3D7_0712600 | erythrocyte membrane protein 1, PfEMP1 (VAR)                           | -1.43 | 3.08    | 1.29    |
| PF3D7_0712700 | Plasmodium RNA of unknown function RUF6-13                             | -1.38 | 0.17    | 0.00    |
| PF3D7_0712800 | erythrocyte membrane protein 1, PfEMP1 (VAR)                           | -0.51 | 0.98    | 0.77    |
| PF3D7_0712900 | erythrocyte membrane protein 1, PfEMP1 (VAR)                           | 0.16  | 2.08    | 2.62    |
| PF3D7_0713000 | rifin (RIF)                                                            | -0.14 | 0.22    | 0.22    |
| PF3D7_0713100 | Pfme-2TM Maurer's cleft two transmembrane protein (MC-2TM)             | -0.02 | 3.35    | 3.72    |
| PF3D7_0713200 | RESA-like protein                                                      | -1.75 | 16.26   | 5.46    |
| PF3D7_0713300 | erythrocyte membrane protein 1 (PfEMP1), pseudogene (VAR)              | -0.10 | 28.77   | 30.24   |
| PF3D7_0713400 | serpentine receptor, putative (SR25)                                   | -0.46 | 67.32   | 55.24   |
| PF3D7_0713500 | conserved Plasmodium protein, unknown function                         | -0.97 | 13.74   | 7.90    |
| PF3D7_0713600 | mitochondrial ribosomal protein S5 precursor, putative                 | -0.21 | 6.45    | 6.31    |
| PF3D7_0713700 | conserved Plasmodium protein, unknown function                         | -0.39 | 68.62   | 59.28   |
| PF3D7_0713800 | negative elongation factor A, putative (NELFA)                         | 0.57  | 20.39   | 34.26   |
| PF3D7_0713900 | conserved Plasmodium protein, unknown function                         | -1.50 | 92.40   | 36.95   |
| PF3D7_0714000 | histone H2B variant (H2B.Z)                                            | 0.35  | 1196.76 | 1727.67 |
| PF3D7_0714100 | conserved Plasmodium protein, unknown function                         | 0.52  | 0.63    | 1.04    |
| PF3D7_0714200 | conserved Plasmodium protein, unknown function                         | -0.59 | 74.05   | 55.75   |
| PF3D7_0714300 | palmitoyltransferase, putative (DHH4)                                  | -0.47 | 22.96   | 18.71   |
| PF3D7_0714400 | calmodulin, putative                                                   | -0.51 | 6.07    | 4.80    |
| PF3D7_0714500 | transcription elongation factor s-II, putative                         | -1.27 | 53.45   | 25.01   |
| PF3D7_0714600 | conserved Plasmodium protein, unknown function                         | -0.81 | 44.48   | 28.67   |
| PF3D7_0714700 | tRNA Asparagine                                                        | -0.38 | 0.00    | 0.00    |
| PF3D7_0714800 | tRNA Leucine                                                           | -1.38 | 0.28    | 0.00    |
| PF3D7_0714900 | tRNA Serine                                                            | 1.95  | 0.00    | 0.95    |
| PF3D7_0715000 | 4-nitrophenylphosphatase (PNPase)                                      | -1.65 | 82.78   | 29.81   |
| PF3D7_0715100 | C-Myc-binding protein, putative (MYCBP)                                | 2.25  | 0.75    | 4.35    |
| PF3D7_0715200 | conserved Plasmodium protein, unknown function                         | 0.61  | 17.16   | 29.64   |
| PF3D7_0715300 | calcium/calmodulin-dependent protein kinase, putative                  | 0.27  | 6.82    | 9.32    |
| PF3D7_0715400 | secreted ookinete protein, putative (PSOP20)                           | 0.23  | 6.35    | 8.42    |
| PF3D7_0715500 | mitochondrial ATP synthase F1, epsilon subunit, putative               | 0.77  | 8.50    | 16.51   |
| PF3D7_0715600 | GTP-binding translation elongation factor tu family protein, putative  | 0.96  | 10.56   | 23.21   |
| PF3D7_0715700 | conserved Plasmodium protein, unknown function                         | 0.65  | 3.80    | 6.77    |
| PF3D7_0715800 | drug/metabolite exporter, drug/metabolite transporter                  | -0.23 | 20.39   | 19.70   |
| PF3D7_0715900 | zinc transporter, putative                                             | 0.13  | 29.49   | 36.47   |
| PF3D7_0716000 | RNA-binding protein, putative                                          | -0.67 | 116.03  | 82.39   |
| PF3D7_0716100 | protein SDA1, putative (SDA1)                                          | -1.17 | 58.20   | 29.19   |
| PF3D7_0716200 | conserved Plasmodium protein, unknown function                         | -2.24 | 342.77  | 81.81   |
| PF3D7_0716300 | conserved Plasmodium protein, unknown function                         | -0.16 | 264.01  | 266.69  |
| PF3D7_0716400 | transcription initiation factor IIA subunit 1, putative                | -0.01 | 50.26   | 56.24   |
| PF3D7_0716500 | conserved Plasmodium protein, unknown function                         | 0.59  | 6.15    | 10.48   |
| PF3D7_0716600 | cysteine desulfurase (SufS)                                            | 0.32  | 3.07    | 4.34    |
| PF3D7_0716700 | conserved Plasmodium protein, unknown function                         | 1.18  | 2.25    | 5.76    |
| PF3D7_0716800 | eukaryotic translation initiation factor 3 subunit I, putative (EIF3I) | -0.91 | 364.50  | 219.41  |
| PF3D7_0716900 | drug metabolite transporter, putative                                  | -0.95 | 47.99   | 28.12   |
| PF3D7_0717000 | conserved Plasmodium membrane protein, unknown function                | 0.32  | 13.61   | 19.16   |
| PF3D7_0717100 | conserved Plasmodium protein, unknown function                         | 0.69  | 9.15    | 16.71   |
| PF3D7_0717200 | conserved Plasmodium protein, unknown function                         | 0.71  | 55.17   | 101.83  |
| PF3D7_0717300 | transcription initiation factor IIE, alpha subunit, putative           | 0.22  | 58.95   | 77.76   |
| PF3D7_0717400 | queuine tRNA-ribosyltransferase, putative                              | -0.86 | 143.17  | 88.99   |
| PF3D7_0717500 | calcium-dependent protein kinase 4 (CDPK4)                             | 1.23  | 141.71  | 374.17  |
| PF3D7_0717600 | conserved Plasmodium protein, unknown function                         | 0.27  | 24.93   | 34.06   |
| PF3D7_0717700 | serine--tRNA ligase, putative                                          | -1.28 | 313.35  | 145.23  |
| PF3D7_0717800 | conserved Plasmodium protein, unknown function                         | 1.83  | 1.55    | 6.23    |
| PF3D7_0717900 | thioredoxin-like protein                                               | -0.29 | 11.50   | 10.65   |

|               |                                                                                             |       |         |          |
|---------------|---------------------------------------------------------------------------------------------|-------|---------|----------|
| PF3D7_0718000 | dynein heavy chain, putative                                                                | 0.90  | 0.30    | 0.63     |
| PF3D7_0718100 | exported serine/threonine protein kinase (EST)                                              | 0.89  | 5.95    | 12.46    |
| PF3D7_0718300 | cysteine repeat modular protein 2 (CRMP2)                                                   | 2.98  | 0.08    | 0.75     |
| PF3D7_0718400 | mitochondrial ribosomal protein S8 precursor, putative                                      | 1.63  | 29.58   | 103.25   |
| PF3D7_0718500 | prefoldin subunit 3, putative                                                               | 0.37  | 46.89   | 68.30    |
| PF3D7_0718600 | conserved Plasmodium protein, unknown function                                              | 2.00  | 5.93    | 26.81    |
| PF3D7_0718700 | conserved Plasmodium membrane protein, unknown function                                     | 0.88  | 2.33    | 4.87     |
| PF3D7_0718800 | conserved Plasmodium protein, unknown function                                              | 1.02  | 0.57    | 1.35     |
| PF3D7_0718900 | conserved Plasmodium protein, unknown function                                              | -1.42 | 0.95    | 0.39     |
| PF3D7_0719000 | conserved Plasmodium protein, unknown function                                              | -0.42 | 54.40   | 45.94    |
| PF3D7_0719100 | conserved Plasmodium protein, unknown function                                              | 0.24  | 13.81   | 18.48    |
| PF3D7_0719200 | NIMA related kinase 4 (NEK4)                                                                | 0.45  | 1.87    | 2.90     |
| PF3D7_0719300 | actin-related protein, putative (ARP6)                                                      | -1.23 | 80.48   | 38.84    |
| PF3D7_0719400 | conserved Plasmodium protein, unknown function                                              | 0.58  | 12.86   | 21.76    |
| PF3D7_0719500 | LEM3/CDC50 family protein, putative                                                         | 0.80  | 22.04   | 43.36    |
| PF3D7_0719600 | 60S ribosomal protein L11a, putative                                                        | -1.15 | 906.41  | 461.09   |
| PF3D7_0719700 | 40S ribosomal protein S10, putative                                                         | -0.62 | 700.45  | 514.38   |
| PF3D7_0719800 | conserved Plasmodium protein, unknown function                                              | -0.87 | 12.52   | 7.76     |
| PF3D7_0719900 | conserved Plasmodium membrane protein, unknown function                                     | -0.79 | 41.58   | 27.08    |
| PF3D7_0720000 | exosome complex component CSL4, putative (CSL4)                                             | -1.42 | 52.95   | 22.41    |
| PF3D7_0720100 | small subunit rRNA processing protein, putative                                             | -0.98 | 54.86   | 31.32    |
| PF3D7_0720200 | conserved Plasmodium protein, unknown function                                              | -0.59 | 48.66   | 36.53    |
| PF3D7_0720300 | conserved Plasmodium protein, unknown function                                              | 2.01  | 2.63    | 12.25    |
| PF3D7_0720400 | ferrodoxin reductase-like protein                                                           | -0.19 | 26.22   | 26.05    |
| PF3D7_0720500 | conserved Plasmodium protein, unknown function                                              | 0.27  | 7.36    | 10.06    |
| PF3D7_0720600 | conserved Plasmodium protein, unknown function                                              | -0.03 | 41.18   | 45.70    |
| PF3D7_0720700 | phosphoinositide-binding protein, putative                                                  | -0.36 | 170.12  | 149.60   |
| PF3D7_0720800 | Ham1-like protein, putative                                                                 | 0.44  | 15.35   | 23.51    |
| PF3D7_0720900 | conserved Plasmodium protein, unknown function                                              | 0.67  | 20.58   | 37.12    |
| PF3D7_0721000 | conserved Plasmodium membrane protein, unknown function                                     | 0.38  | 14.81   | 21.71    |
| PF3D7_0721100 | conserved Plasmodium protein, unknown function                                              | 0.17  | 111.08  | 140.99   |
| PF3D7_0721200 | conserved Plasmodium protein, unknown function                                              | -0.61 | 19.36   | 14.28    |
| PF3D7_0721300 | DEAD/DEAH box ATP-dependent RNA helicase, putative                                          | -1.17 | 84.15   | 42.20    |
| PF3D7_0721400 | conserved Plasmodium protein, unknown function                                              | 0.40  | 18.68   | 27.89    |
| PF3D7_0721500 | conserved Plasmodium membrane protein, unknown function                                     | -0.62 | 2.17    | 1.59     |
| PF3D7_0721600 | 40S ribosomal protein S5, putative                                                          | -1.00 | 1596.62 | 904.68   |
| PF3D7_0721700 | secreted ookinete protein, putative (PSOP1)                                                 | 0.07  | 5.68    | 6.75     |
| PF3D7_0721800 | conserved Plasmodium protein, unknown function                                              | -0.42 | 112.21  | 94.54    |
| PF3D7_0721900 | V-type ATPase V0 subunit e, putative                                                        | -0.02 | 53.97   | 60.28    |
| PF3D7_0722000 | conserved Plasmodium protein, unknown function                                              | -0.41 | 57.03   | 48.62    |
| PF3D7_0722100 | PeiOta protein homologue, putative                                                          | -1.17 | 45.61   | 22.92    |
| PF3D7_0722200 | rhoGTPase-associated leucine zipper-like protein 1 (RALP1)                                  | 1.24  | 171.51  | 458.67   |
| PF3D7_0722300 | ubiquitin carboxyl-terminal hydrolase, putative                                             | -0.89 | 55.39   | 33.67    |
| PF3D7_0722400 | GTP-binding protein, putative                                                               | -0.76 | 261.25  | 174.39   |
| PF3D7_0722500 | cell cycle control protein cwf15, putative                                                  | -0.40 | 77.22   | 66.08    |
| PF3D7_0722600 | U3 small nucleolar RNA-associated protein 7, putative (UTP7)                                | -0.98 | 104.94  | 60.11    |
| PF3D7_0722700 | conserved Plasmodium protein, unknown function                                              | 0.23  | 30.24   | 40.20    |
| PF3D7_0722800 | conserved Plasmodium protein, unknown function                                              | 0.71  | 2.10    | 3.90     |
| PF3D7_0722900 | conserved Plasmodium protein, unknown function                                              | 0.51  | 4.39    | 7.08     |
| PF3D7_0723000 | tRNA <sup>His</sup> guanylyltransferase, putative                                           | 0.13  | 13.91   | 17.17    |
| PF3D7_0723100 | conserved Plasmodium protein, unknown function                                              | 0.82  | 0.55    | 1.11     |
| PF3D7_0723200 | conserved Plasmodium protein, unknown function                                              | 0.36  | 2.33    | 3.38     |
| PF3D7_0723300 | conserved Plasmodium protein, unknown function                                              | 1.96  | 22.15   | 97.11    |
| PF3D7_0723400 | conserved Plasmodium protein, unknown function                                              | -1.11 | 191.75  | 100.26   |
| PF3D7_0723500 | dynactin subunit 5, putative                                                                | -1.50 | 12.80   | 5.09     |
| PF3D7_0723600 | conserved Plasmodium protein, unknown function                                              | -0.72 | 44.70   | 30.71    |
| PF3D7_0723700 | metallo-hydrolase/oxidoreductase, putative                                                  | 0.03  | 17.35   | 19.94    |
| PF3D7_0723800 | conserved Plasmodium protein, unknown function                                              | 1.15  | 29.36   | 73.70    |
| PF3D7_0723900 | conserved Plasmodium protein, unknown function                                              | -1.17 | 89.13   | 44.79    |
| PF3D7_0724000 | Rab GTPase activator and protein kinase, putative                                           | -0.46 | 3.32    | 2.73     |
| PF3D7_0724100 | conserved Plasmodium protein, unknown function                                              | 0.44  | 67.82   | 103.61   |
| PF3D7_0724200 | type 2A phosphatase-associated protein 42, putative (TAP42)                                 | -0.98 | 22.92   | 13.10    |
| PF3D7_0724300 | 3-demethylubiquinone-9 3-methyltransferase, putative (COQ3)                                 | -0.78 | 6.55    | 4.31     |
| PF3D7_0724400 | mitochondrial import inner membrane translocase subunit TIM14, putative (PAM18)             | -1.39 | 105.43  | 45.25    |
| PF3D7_0724500 | conserved Plasmodium protein, unknown function                                              | -1.48 | 12.36   | 4.98     |
| PF3D7_0724600 | protein kinase, putative                                                                    | -0.13 | 9.31    | 9.63     |
| PF3D7_0724700 | conserved Plasmodium protein, unknown function                                              | -1.46 | 45.36   | 18.56    |
| PF3D7_0724800 | kelch protein, putative                                                                     | 1.98  | 14.11   | 62.88    |
| PF3D7_0724900 | kinesin-19, putative                                                                        | 4.07  | 2.70    | 51.19    |
| PF3D7_0725000 | exonuclease I, putative                                                                     | 0.47  | 14.41   | 22.51    |
| PF3D7_0725100 | conserved Plasmodium membrane protein, unknown function                                     | -0.62 | 26.53   | 19.56    |
| PF3D7_0725200 | mago nashi protein homologue, putative                                                      | -0.69 | 76.22   | 53.33    |
| PF3D7_0725300 | conserved Plasmodium protein, unknown function                                              | -0.28 | 64.30   | 59.63    |
| PF3D7_0725400 | conserved Plasmodium protein, unknown function                                              | 4.01  | 53.49   | 974.16   |
| PF3D7_0725500 | unspecified product                                                                         | 1.57  | 47.15   | 158.57   |
| PF3D7_0725600 | 18S ribosomal RNA                                                                           | 0.86  | 1004.72 | 2056.30  |
| PF3D7_0725700 | unspecified product                                                                         | 1.61  | 2.33    | 8.22     |
| PF3D7_0725800 | 5.8S ribosomal RNA                                                                          | 3.08  | 62.27   | 595.62   |
| PF3D7_0725900 | unspecified product                                                                         | -0.09 | 24.78   | 26.28    |
| PF3D7_0726000 | 28S ribosomal RNA                                                                           | 2.70  | 1595.88 | 11683.10 |
| PF3D7_0726100 | Plasmodium exported protein, unknown function                                               | -1.49 | 300.30  | 120.48   |
| PF3D7_0726200 | serine/threonine protein kinase, FIKK family (FIKK7.1)                                      | -0.45 | 41.69   | 34.46    |
| PF3D7_0726300 | DNA mismatch repair protein PMS1, putative (PMS1)                                           | -1.22 | 18.67   | 9.03     |
| PF3D7_0726400 | conserved Plasmodium membrane protein, unknown function                                     | -0.65 | 17.40   | 12.50    |
| PF3D7_0726500 | ubiquitin carboxyl-terminal hydrolase, putative                                             | -0.67 | 95.18   | 67.39    |
| PF3D7_0726600 | conserved Plasmodium protein, unknown function                                              | 0.45  | 4.52    | 6.96     |
| PF3D7_0726700 | conserved Plasmodium protein, unknown function                                              | 0.68  | 25.33   | 45.86    |
| PF3D7_0726800 | dolichyl-diphosphooligosaccharide-protein glycosyltransferase subunit DAD1, putative (DAD1) | 0.42  | 2.07    | 3.19     |
| PF3D7_0726900 | mitochondrial import inner membrane translocase subunit TIM50, putative (TIM50)             | -0.63 | 12.79   | 9.35     |
| PF3D7_0727000 | vacuolar protein sorting-associated protein 53, putative (VPS53)                            | -0.05 | 16.24   | 17.76    |
| PF3D7_0727100 | conserved Plasmodium protein, unknown function                                              | 0.22  | 9.36    | 12.29    |
| PF3D7_0727200 | cysteine desulfurase, putative (NFS)                                                        | -1.60 | 66.77   | 24.85    |
| PF3D7_0727300 | DNA (cytosine-5)-methyltransferase (DNMT)                                                   | -0.84 | 25.06   | 15.84    |
| PF3D7_0727400 | proteasome subunit alpha type-5, putative                                                   | -0.39 | 164.09  | 141.46   |
| PF3D7_0727500 | conserved Plasmodium protein, unknown function                                              | 0.41  | 4.48    | 6.74     |
| PF3D7_0727600 | conserved Plasmodium protein, unknown function                                              | 0.15  | 1.01    | 1.27     |
| PF3D7_0727700 | conserved Plasmodium protein, unknown function                                              | 0.28  | 4.37    | 5.99     |
| PF3D7_0727800 | cation transporting ATPase, putative                                                        | -0.53 | 34.25   | 26.84    |

|                 |                                                                    |       |         |         |
|-----------------|--------------------------------------------------------------------|-------|---------|---------|
| PF3D7_0727900   | conserved Plasmodium protein, unknown function                     | -2.41 | 38.14   | 8.09    |
| PF3D7_0728000   | eukaryotic translation initiation factor 2 alpha subunit, putative | -1.13 | 346.20  | 178.80  |
| PF3D7_0728100   | conserved Plasmodium membrane protein, unknown function            | 0.66  | 2.48    | 4.42    |
| PF3D7_0728200   | actin-like protein, putative (ALP3)                                | 0.21  | 4.40    | 5.74    |
| PF3D7_0728300   | conserved Plasmodium protein, unknown function                     | 0.56  | 5.60    | 9.38    |
| PF3D7_0728400.1 | conserved Plasmodium protein, unknown function                     | 0.01  | 5.11    | 5.83    |
| PF3D7_0728400.2 | conserved Plasmodium protein, unknown function                     | 0.06  | 4.82    | 5.68    |
| PF3D7_0728500   | conserved Plasmodium protein, unknown function                     | 1.16  | 0.47    | 1.26    |
| PF3D7_0728600   | zinc finger, C3HC4 type, putative                                  | 1.24  | 10.91   | 29.10   |
| PF3D7_0728700   | alpha/beta hydrolase, putative                                     | 1.24  | 1.53    | 4.11    |
| PF3D7_0728800   | conserved Plasmodium protein, unknown function                     | 0.06  | 10.33   | 12.20   |
| PF3D7_0728900   | RNA-binding protein, putative                                      | -0.70 | 48.27   | 33.64   |
| PF3D7_0729000   | signal recognition particle subunit SRP9 (SRP9)                    | -1.04 | 26.64   | 14.62   |
| PF3D7_0729100   | conserved Plasmodium protein, unknown function                     | -0.05 | 13.69   | 14.92   |
| PF3D7_0729200   | 1-cys peroxiredoxin (AOP)                                          | 0.33  | 6.38    | 9.08    |
| PF3D7_0729300   | 60S ribosomal export protein NMD3, putative (NMD3)                 | -1.07 | 72.59   | 39.00   |
| PF3D7_0729400   | ribosome biogenesis protein BRX1 homolog, putative                 | -1.17 | 163.66  | 82.26   |
| PF3D7_0729500   | mRNA (N6-adenosine)-methyltransferase, putative                    | -0.51 | 73.95   | 58.62   |
| PF3D7_0729600   | conserved Plasmodium protein, unknown function                     | 1.19  | 14.16   | 36.52   |
| PF3D7_0729700   | conserved Plasmodium protein, unknown function                     | 1.11  | 1.70    | 4.17    |
| PF3D7_0729800   | dynein light chain, putative                                       | 0.80  | 1.07    | 2.19    |
| PF3D7_0729900   | dynein heavy chain, putative                                       | 1.17  | 2.08    | 5.30    |
| PF3D7_0730000   | conserved Plasmodium protein, unknown function                     | 1.61  | 3.38    | 11.83   |
| PF3D7_0730100   | tRNA pseudouridine synthase D, putative                            | 0.68  | 2.20    | 3.98    |
| PF3D7_0730200   | AP-4 complex subunit beta, putative                                | -1.12 | 30.07   | 15.63   |
| PF3D7_0730300   | transcription factor with AP2 domain(s) (AP2-L)                    | -0.42 | 663.24  | 559.97  |
| PF3D7_0730400   | conserved Plasmodium protein, unknown function                     | 2.72  | 29.11   | 217.46  |
| PF3D7_0730500   | conserved Plasmodium protein, unknown function                     | 1.19  | 12.72   | 32.88   |
| PF3D7_0730600   | tRNA Valine                                                        | 1.50  | 0.61    | 2.67    |
| PF3D7_0730700   | tRNA Threonine                                                     | 0.62  | 0.00    | 0.27    |
| PF3D7_0730800.1 | Plasmodium exported protein, unknown function                      | -0.30 | 1462.22 | 1338.34 |
| PF3D7_0730800.2 | Plasmodium exported protein, unknown function                      | -0.31 | 1455.65 | 1330.38 |
| PF3D7_0730900   | EMP1-trafficking protein (PTP4)                                    | 0.24  | 717.79  | 954.64  |
| PF3D7_0731000   | unspecified product                                                | 0.95  | 10.31   | 22.48   |
| PF3D7_0731100   | EMP1-trafficking protein (PTP2)                                    | -1.22 | 902.07  | 438.87  |
| PF3D7_0731200   | Plasmodium exported protein, unknown function                      | -1.08 | 137.00  | 73.43   |
| PF3D7_0731300   | Plasmodium exported protein (PHISTb), unknown function (PF3D7)     | -1.57 | 466.07  | 177.29  |
| PF3D7_0731400   | serine/threonine protein kinase, FIKK family, pseudogene (FIKK7.2) | 2.06  | 24.27   | 114.38  |
| PF3D7_0731500   | erythrocyte binding antigen-175 (EBA175)                           | 5.08  | 52.19   | 1987.62 |
| PF3D7_0731600   | acyl-CoA synthetase (ACSS)                                         | 0.09  | 87.36   | 104.69  |
| PF3D7_0731700   | Plasmodium exported protein (hyp9), unknown function               | 0.06  | 8.87    | 10.49   |
| PF3D7_0731800   | alpha/beta hydrolase, putative (GEXP08)                            | -0.77 | 36.71   | 24.28   |
| PF3D7_0731900   | rifin, pseudogene (RIF)                                            | 2.24  | 0.14    | 0.86    |
| PF3D7_0732000   | stevor                                                             | 1.06  | 0.15    | 0.39    |
| PF3D7_0732100   | erythrocyte membrane protein 1 (PEMP1), pseudogene (VAR)           | 1.55  | 0.16    | 0.56    |
| PF3D7_0732200   | rifin (RIF)                                                        | 2.27  | 0.06    | 0.42    |
| PF3D7_0732300   | rifin (RIF)                                                        | 0.36  | 0.04    | 0.08    |
| PF3D7_0732400   | rifin (RIF)                                                        | 0.62  | 0.14    | 0.25    |
| PF3D7_0732500   | rifin (RIF)                                                        | 1.32  | 0.32    | 0.94    |
| PF3D7_0732600   | Plasmodium exported protein, unknown function, fragment            | -0.38 | 0.00    | 0.00    |
| PF3D7_0732700   | rifin (RIF)                                                        | 2.67  | 0.06    | 0.58    |
| PF3D7_0732800   | erythrocyte membrane protein 1 (PEMP1), exon 2                     | -0.34 | 0.57    | 0.51    |
| PF3D7_0732900   | rifin (RIF)                                                        | -0.06 | 3.43    | 3.71    |
| PF3D7_0733000   | erythrocyte membrane protein 1, PfEMP1 (VAR)                       | 0.54  | 3.14    | 5.14    |
| PF3D7_0800100   | erythrocyte membrane protein 1, PfEMP1 (VAR)                       | 1.26  | 3.76    | 10.15   |
| PF3D7_0800200   | erythrocyte membrane protein 1, PfEMP1 (VAR)                       | 0.71  | 0.70    | 1.30    |
| PF3D7_0800300   | erythrocyte membrane protein 1, PfEMP1 (VAR)                       | 0.68  | 1.70    | 3.09    |
| PF3D7_0800400   | rifin (RIF)                                                        | -0.54 | 7.74    | 6.01    |
| PF3D7_0800500   | rifin (RIF)                                                        | -0.34 | 0.81    | 0.73    |
| PF3D7_0800600   | Plasmodium exported protein (PHISTa), unknown function             | 1.22  | 1.66    | 4.43    |
| PF3D7_0800700   | surface-associated interspersed protein 8.3 (SURFIN 8.3) (SURF8.3) | 0.80  | 2.14    | 4.22    |
| PF3D7_0800800   | Plasmodium exported protein (hyp7), unknown function               | 2.97  | 3.13    | 28.03   |
| PF3D7_0800900   | Plasmodium exported protein (hyp7), unknown function, pseudogene   | -0.78 | 20.25   | 13.27   |
| PF3D7_0801000   | Plasmodium exported protein (PHISTc), unknown function             | -1.29 | 615.81  | 284.68  |
| PF3D7_0801100   | 28S ribosomal RNA                                                  | 0.78  | 0.70    | 1.36    |
| PF3D7_0801200   | 5.8S ribosomal RNA                                                 | 0.36  | 0.28    | 0.48    |
| PF3D7_0801300   | von Willebrand factor A domain-related protein (WARP)              | 3.12  | 1.92    | 19.07   |
| PF3D7_0801400   | probable protein, unknown function                                 | 0.65  | 2.46    | 4.44    |
| PF3D7_0801500   | nucleolar protein 10, putative (NOL10)                             | -1.14 | 75.40   | 38.63   |
| PF3D7_0801600   | conserved Plasmodium protein, unknown function                     | -0.32 | 2.96    | 2.68    |
| PF3D7_0801700   | sentrin-specific protease 2, putative (SEN2)                       | -0.02 | 17.25   | 19.22   |
| PF3D7_0801800   | mannose-6-phosphate isomerase, putative                            | -1.38 | 262.03  | 113.50  |
| PF3D7_0801900   | conserved Plasmodium protein, unknown function                     | -0.62 | 19.38   | 14.28   |
| PF3D7_0802000   | glutamate dehydrogenase, putative (GDH3)                           | 0.08  | 144.36  | 172.27  |
| PF3D7_0802100   | transcription factor with AP2 domain(s) (ApiAP2)                   | 0.30  | 33.50   | 46.63   |
| PF3D7_0802200   | 1-cys peroxiredoxin (1-CysPxx)                                     | 1.65  | 55.31   | 195.87  |
| PF3D7_0802300   | periodic tryptophan protein 2, putative (PWP2)                     | -0.96 | 62.63   | 36.26   |
| PF3D7_0802400   | conserved Plasmodium protein, unknown function                     | -1.13 | 69.14   | 35.76   |
| PF3D7_0802500   | inositol 5-phosphatase, putative                                   | 0.04  | 21.60   | 25.06   |
| PF3D7_0802600   | adenylyl cyclase beta (ACbeta)                                     | 1.31  | 32.19   | 90.35   |
| PF3D7_0802700   | conserved Plasmodium protein, unknown function                     | 0.45  | 2.43    | 3.76    |
| PF3D7_0802800   | serine/threonine protein phosphatase 2B catalytic subunit A (CNA)  | 1.53  | 41.90   | 137.00  |
| PF3D7_0802900   | conserved Plasmodium protein, unknown function                     | 0.30  | 4.23    | 5.92    |
| PF3D7_0803000   | peptidyl-prolyl cis-trans isomerase (CYP81)                        | -0.65 | 80.85   | 58.01   |
| PF3D7_0803100   | U3 small nucleolar RNA-associated protein 14, putative (UTP14)     | -0.34 | 80.27   | 71.53   |
| PF3D7_0803200   | filament assembling protein, putative                              | 0.37  | 34.27   | 50.17   |
| PF3D7_0803300   | mitogen-activated protein kinase organizer 1, putative (MORG1)     | 0.33  | 12.81   | 18.14   |
| PF3D7_0803400   | DNA repair and recombination protein RAD54, putative (RAD54)       | 1.06  | 37.41   | 87.85   |
| PF3D7_0803500   | AAA family ATPase, putative                                        | 1.21  | 25.37   | 66.41   |
| PF3D7_0803600   | conserved Plasmodium protein, unknown function                     | -0.03 | 41.76   | 46.16   |
| PF3D7_0803700   | tubulin gamma chain (g-tub)                                        | -1.08 | 18.99   | 10.17   |
| PF3D7_0803800   | proteasome subunit beta type-4                                     | -0.68 | 210.52  | 148.45  |
| PF3D7_0803900   | C/D small nucleolar RNA                                            | -0.38 | 1.03    | 0.90    |
| PF3D7_0804000   | cactin homolog, putative                                           | -0.30 | 96.52   | 88.52   |
| PF3D7_0804100   | small nucleolar RNA snoR06                                         | -0.18 | 61.93   | 61.91   |
| PF3D7_0804200   | Plasmodium RNA of unknown function RUF3                            | -2.38 | 0.42    | 0.00    |
| PF3D7_0804300   | conserved Plasmodium protein, unknown function                     | -1.18 | 121.23  | 60.44   |
| PF3D7_0804400   | methionine aminopeptidase 1c, putative (METAP1c)                   | 0.35  | 8.18    | 11.80   |

|                 |                                                                                     |       |         |         |
|-----------------|-------------------------------------------------------------------------------------|-------|---------|---------|
| PF3D7_0804500   | conserved Plasmodium membrane protein, unknown function                             | 0.46  | 19.79   | 30.79   |
| PF3D7_0804600   | U2 snRNA/tRNA pseudouridine synthase, putative                                      | -0.76 | 48.22   | 32.24   |
| PF3D7_0804700   | conserved Plasmodium protein, unknown function                                      | -0.97 | 8.82    | 5.09    |
| PF3D7_0804800   | peptidyl-prolyl cis-trans isomerase (CYP24)                                         | -1.35 | 151.59  | 66.96   |
| PF3D7_0804900   | GTPase-activating protein, putative                                                 | -0.56 | 94.29   | 72.47   |
| PF3D7_0805000   | alpha/beta hydrolase, putative                                                      | 0.94  | 9.47    | 20.49   |
| PF3D7_0805100   | conserved Plasmodium protein, unknown function                                      | 2.32  | 5.23    | 29.61   |
| PF3D7_0805200   | gamete release protein, putative (GAMER)                                            | 4.07  | 28.36   | 537.57  |
| PF3D7_0805300   | conserved Plasmodium protein, unknown function                                      | 3.58  | 4.09    | 55.33   |
| PF3D7_0805400   | acetyltransferase, putative                                                         | -0.85 | 27.12   | 17.02   |
| PF3D7_0805500   | conserved Plasmodium protein, unknown function                                      | -0.88 | 28.72   | 17.65   |
| PF3D7_0805600   | PAP2-like protein, putative                                                         | -0.33 | 154.70  | 139.46  |
| PF3D7_0805700   | serine/threonine protein kinase, FIKK family (FIKK8)                                | -0.79 | 26.23   | 17.09   |
| PF3D7_0805800   | conserved Plasmodium protein, unknown function                                      | 0.34  | 0.22    | 0.33    |
| PF3D7_0805900   | conserved protein, unknown function                                                 | 0.41  | 5.50    | 8.24    |
| PF3D7_0806000   | AAA family ATPase, putative                                                         | -1.15 | 20.92   | 10.66   |
| PF3D7_0806100   | conserved Plasmodium protein, unknown function                                      | -0.74 | 9.05    | 6.11    |
| PF3D7_0806200   | conserved Plasmodium membrane protein, unknown function                             | 0.51  | 10.08   | 16.16   |
| PF3D7_0806300   | ferlin, putative                                                                    | 0.49  | 14.97   | 23.79   |
| PF3D7_0806400   | glycosyltransferase family 28 protein, putative                                     | 0.03  | 3.15    | 3.65    |
| PF3D7_0806500   | DnaJ protein, putative                                                              | 0.78  | 72.91   | 141.82  |
| PF3D7_0806600   | kinesin-like protein, putative                                                      | -1.68 | 39.03   | 13.75   |
| PF3D7_0806700   | conserved Plasmodium membrane protein, unknown function                             | -1.19 | 32.90   | 16.27   |
| PF3D7_0806800   | vacuolar proton translocating ATPase subunit A, putative                            | 0.22  | 272.72  | 358.49  |
| PF3D7_0806900   | conserved Plasmodium protein, unknown function                                      | -0.71 | 17.43   | 12.02   |
| PF3D7_0807000   | gas41 homologue, putative                                                           | -1.76 | 35.76   | 11.89   |
| PF3D7_0807100   | RNA helicase, putative                                                              | -1.24 | 25.77   | 12.31   |
| PF3D7_0807200   | conserved Plasmodium membrane protein, unknown function                             | -1.54 | 49.98   | 19.46   |
| PF3D7_0807300   | ras-related protein Rab-18 (RAB18)                                                  | -1.35 | 126.01  | 55.83   |
| PF3D7_0807400   | conserved Plasmodium protein, unknown function                                      | 0.12  | 8.56    | 10.52   |
| PF3D7_0807500   | proteasome subunit alpha type-6, putative                                           | -0.29 | 181.51  | 167.42  |
| PF3D7_0807600   | conserved Plasmodium protein, unknown function                                      | -0.68 | 142.13  | 99.85   |
| PF3D7_0807700   | serine protease DegP (DegP)                                                         | 1.00  | 12.07   | 27.31   |
| PF3D7_0807800   | 26S proteasome regulatory subunit RPN10, putative (RPN10)                           | -0.89 | 206.21  | 125.35  |
| PF3D7_0807900   | tyrosine-tRNA ligase (TyrRS)                                                        | -1.00 | 195.59  | 110.64  |
| PF3D7_0808000   | conserved Plasmodium protein, unknown function                                      | -0.06 | 0.96    | 1.04    |
| PF3D7_0808100   | AP-3 complex subunit delta, putative                                                | -1.48 | 10.08   | 4.08    |
| PF3D7_0808200   | plasmepsin X                                                                        | 3.88  | 19.38   | 322.92  |
| PF3D7_0808300   | ubiquitin regulatory protein, putative                                              | 1.09  | 159.42  | 382.11  |
| PF3D7_0808400   | coatamer subunit epsilon, putative (SEC28)                                          | -1.52 | 38.86   | 15.32   |
| PF3D7_0808500   | Plasmodium RNA of unknown function RUF6-4                                           | -1.96 | 0.30    | 0.00    |
| PF3D7_0808600   | erythrocyte membrane protein 1, PfEMP1 (VAR)                                        | 0.17  | 2.04    | 2.60    |
| PF3D7_0808700   | erythrocyte membrane protein 1, PfEMP1 (VAR)                                        | 0.68  | 1.39    | 2.51    |
| PF3D7_0808800   | rifin (RIF)                                                                         | 0.59  | 2.71    | 4.63    |
| PF3D7_0808900   | rifin (RIF)                                                                         | 1.19  | 2.83    | 7.34    |
| PF3D7_0809000   | Plasmodium RNA of unknown function RUF6-10                                          | -1.38 | 0.21    | 0.00    |
| PF3D7_0809100   | erythrocyte membrane protein 1, PfEMP1 (VAR)                                        | -0.43 | 8.78    | 7.39    |
| PF3D7_0809200   | asparagine-rich antigen Pfa55-14 (pfa55-14)                                         | -1.69 | 30.05   | 10.51   |
| PF3D7_0809300   | unspecified product                                                                 | 0.64  | 10.10   | 17.81   |
| PF3D7_0809400   | conserved Plasmodium protein, unknown function                                      | 1.61  | 5.80    | 20.03   |
| PF3D7_0809500   | histone acetyltransferase subunit NuA4, putative                                    | -0.63 | 46.51   | 34.03   |
| PF3D7_0809600   | peptidase family C50, putative                                                      | 0.65  | 1.75    | 3.10    |
| PF3D7_0809700   | RuvB-like helicase 1 (RUVB1)                                                        | 1.31  | 2.21    | 6.22    |
| PF3D7_0809800   | conserved Plasmodium protein, unknown function                                      | 0.00  | 1.48    | 1.67    |
| PF3D7_0809900   | JmjC domain containing protein (JmjC1)                                              | -1.96 | 30.31   | 8.78    |
| PF3D7_0810000   | acyl-CoA binding protein, putative                                                  | 0.03  | 75.16   | 86.89   |
| PF3D7_0810100   | apicoplast ribosomal protein L33 precursor, putative                                | -0.96 | 2.13    | 1.22    |
| PF3D7_0810200   | ABC1 family, putative (ABCK1)                                                       | 1.00  | 4.42    | 10.01   |
| PF3D7_0810300   | protein phosphatase PPM5, putative (PPM5)                                           | 2.82  | 78.34   | 625.11  |
| PF3D7_0810400   | aquaporin, putative (AQP2)                                                          | -0.26 | 5.98    | 5.64    |
| PF3D7_0810500   | protein phosphatase PPM7, putative (PPM7)                                           | -0.27 | 33.18   | 31.12   |
| PF3D7_0810600   | RNA helicase, putative                                                              | -1.62 | 396.40  | 146.01  |
| PF3D7_0810700   | conserved Plasmodium protein, unknown function                                      | -0.60 | 11.46   | 8.56    |
| PF3D7_0810800   | hydroxymethyl-dihydropterin pyrophosphokinase-dihydropterolate synthase (PPPK-DHPS) | -1.09 | 31.24   | 16.55   |
| PF3D7_0810900.1 | conserved Plasmodium protein, unknown function                                      | 0.77  | 10.25   | 19.70   |
| PF3D7_0810900.2 | conserved Plasmodium protein, unknown function                                      | 0.93  | 8.63    | 18.59   |
| PF3D7_0811000   | cullin-1, putative (CUL1)                                                           | 0.27  | 14.74   | 20.06   |
| PF3D7_0811100   | mitochondrial carrier protein, putative                                             | -0.66 | 6.74    | 4.83    |
| PF3D7_0811200   | ER membrane protein complex subunit 1, putative (EMC1)                              | -1.50 | 41.56   | 16.60   |
| PF3D7_0811300   | CCR4-associated factor 1 (CAF1)                                                     | -1.00 | 571.40  | 322.94  |
| PF3D7_0811400   | conserved protein, unknown function                                                 | -0.83 | 274.10  | 173.79  |
| PF3D7_0811500   | histone-arginine methyltransferase CARM1, putative (CARM1)                          | -1.57 | 37.10   | 14.13   |
| PF3D7_0811600   | conserved Plasmodium protein, unknown function                                      | -0.41 | 37.17   | 31.59   |
| PF3D7_0811700   | conserved Plasmodium protein, unknown function                                      | 0.08  | 1.09    | 1.30    |
| PF3D7_0811800   | conserved Plasmodium protein, unknown function                                      | -0.46 | 3.47    | 2.85    |
| PF3D7_0811900   | RNA-binding protein, putative                                                       | 0.35  | 11.89   | 17.12   |
| PF3D7_0812000   | conserved Plasmodium protein, unknown function                                      | -1.10 | 6.42    | 3.37    |
| PF3D7_0812100   | conserved Plasmodium protein, unknown function                                      | -0.95 | 37.14   | 21.65   |
| PF3D7_0812200   | trypsin-like serine protease, putative                                              | -0.30 | 1.99    | 1.83    |
| PF3D7_0812220   | GTPase, putative                                                                    | 0.09  | 6.22    | 7.51    |
| PF3D7_0812300   | sporozoite surface protein 3, putative (SSP3)                                       | 0.37  | 3.23    | 4.72    |
| PF3D7_0812400   | karyopherin alpha (KARalpha)                                                        | -0.15 | 210.46  | 213.85  |
| PF3D7_0812500   | RNA-binding protein, putative                                                       | -0.83 | 195.24  | 123.65  |
| PF3D7_0812600   | ubiquitin-conjugating enzyme, putative                                              | -1.13 | 53.95   | 27.89   |
| PF3D7_0812700   | RNA-binding protein (U1 snRNP-like), putative                                       | -1.52 | 80.65   | 31.80   |
| PF3D7_0812800   | conserved Plasmodium protein, unknown function                                      | -0.04 | 9.51    | 10.50   |
| PF3D7_0812900   | probable protein, unknown function                                                  | 1.79  | 1.28    | 5.00    |
| PF3D7_0813000   | conserved Plasmodium protein, unknown function                                      | 0.19  | 105.49  | 136.30  |
| PF3D7_0813100   | conserved Plasmodium protein, unknown function                                      | 1.04  | 20.71   | 48.00   |
| PF3D7_0813200   | CS domain protein, putative                                                         | 0.14  | 33.69   | 41.90   |
| PF3D7_0813300   | conserved Plasmodium protein, unknown function                                      | 0.21  | 581.00  | 757.20  |
| PF3D7_0813400   | conserved Plasmodium protein, unknown function                                      | -1.40 | 885.90  | 378.02  |
| PF3D7_0813500   | conserved Plasmodium protein, unknown function                                      | 0.49  | 5.41    | 8.59    |
| PF3D7_0813600   | translation initiation factor SUI1, putative                                        | -1.27 | 144.25  | 67.60   |
| PF3D7_0813700   | ABC transporter F family member 1, putative (ABCF1)                                 | 1.32  | 6.80    | 19.22   |
| PF3D7_0813800   | GDP-mannose 4,6-dehydratase (GMD)                                                   | 0.61  | 11.74   | 20.33   |
| PF3D7_0813900   | 40S ribosomal protein S16, putative                                                 | -1.24 | 1563.50 | 746.14  |
| PF3D7_0814000   | 60S ribosomal protein L13-2, putative                                               | -0.49 | 1328.42 | 1065.14 |

|               |                                                                                  |       |         |         |
|---------------|----------------------------------------------------------------------------------|-------|---------|---------|
| PF3D7_0814100 | conserved Plasmodium protein, unknown function                                   | -1.57 | 38.34   | 14.61   |
| PF3D7_0814200 | DNA/RNA-binding protein Alba 1 (ALBA1)                                           | -0.14 | 3932.26 | 4018.46 |
| PF3D7_0814300 | ATPase, putative                                                                 | -1.28 | 56.77   | 26.32   |
| PF3D7_0814400 | phospholipase DDHD1, putative                                                    | 0.06  | 11.33   | 13.34   |
| PF3D7_0814500 | conserved Plasmodium protein, unknown function                                   | -0.58 | 49.61   | 37.61   |
| PF3D7_0814600 | conserved Plasmodium protein, unknown function                                   | 1.46  | 5.29    | 16.47   |
| PF3D7_0814700 | conserved Plasmodium protein, unknown function                                   | 2.07  | 1.99    | 9.52    |
| PF3D7_0814900 | superoxide dismutase [Fe] (FeSOD)                                                | -0.37 | 145.35  | 126.93  |
| PF3D7_0815000 | selenoprotein (Sel3)                                                             | 0.83  | 5.01    | 10.06   |
| PF3D7_0815100 | RAP protein, putative                                                            | 2.33  | 1.11    | 6.34    |
| PF3D7_0815200 | importin beta, putative                                                          | -1.41 | 186.83  | 79.26   |
| PF3D7_0815300 | FAD-dependent monooxygenase, putative                                            | 0.65  | 1.92    | 3.40    |
| PF3D7_0815400 | conserved Plasmodium protein, unknown function                                   | 0.84  | 9.37    | 19.01   |
| PF3D7_0815500 | conserved Plasmodium protein, unknown function                                   | 0.11  | 17.27   | 21.10   |
| PF3D7_0815600 | eukaryotic translation initiation factor 3 subunit G, putative (EIF3G)           | -0.81 | 294.36  | 190.00  |
| PF3D7_0815700 | ubiquitin (Ub)                                                                   | -1.51 | 2.22    | 0.87    |
| PF3D7_0815800 | vacuolar protein sorting-associated protein 9, putative (VPS9)                   | 0.83  | 40.91   | 82.19   |
| PF3D7_0815900 | dihydrolipoyl dehydrogenase, apicoplast (aLipDH)                                 | 0.58  | 3.03    | 5.12    |
| PF3D7_0816000 | ribosome assembly protein RRB1, putative (RRB1)                                  | -1.52 | 133.67  | 52.46   |
| PF3D7_0816100 | phosphopantothenoyleysteine decarboxylase, putative                              | -0.11 | 45.36   | 47.47   |
| PF3D7_0816200 | vacuolar protein sorting-associated protein 2, putative (VPS2)                   | 0.35  | 23.11   | 33.29   |
| PF3D7_0816300 | conserved Plasmodium protein, unknown function                                   | -1.75 | 2.57    | 0.86    |
| PF3D7_0816400 | conserved Plasmodium protein, unknown function                                   | 0.53  | 15.92   | 25.90   |
| PF3D7_0816500 | small heat shock protein HSP20, putative (HSP20)                                 | 2.11  | 0.39    | 2.07    |
| PF3D7_0816600 | chaperone protein ClpB1 (ClpB1)                                                  | 1.32  | 10.51   | 29.66   |
| PF3D7_0816700 | trafficking protein particle complex subunit 2-like protein, putative (TRAPPC2L) | -0.04 | 8.81    | 9.70    |
| PF3D7_0816800 | meiotic recombination protein DMC1, putative (DMC1)                              | 0.79  | 0.24    | 0.49    |
| PF3D7_0816900 | adenylate kinase 2 (AK2)                                                         | 1.55  | 0.11    | 0.42    |
| PF3D7_0817000 | NEDD8-activating enzyme E1 catalytic subunit, putative                           | 0.47  | 1.30    | 2.05    |
| PF3D7_0817100 | GTPase, putative                                                                 | 1.04  | 1.32    | 3.08    |
| PF3D7_0817200 | conserved Plasmodium protein, unknown function                                   | -0.59 | 44.02   | 33.14   |
| PF3D7_0817300 | asparagine-rich antigen                                                          | -0.10 | 24.97   | 26.30   |
| PF3D7_0817400 | phosphatase, putative                                                            | -0.85 | 3.94    | 2.47    |
| PF3D7_0817500 | protein kinase c inhibitor-like protein, putative                                | -0.09 | 313.07  | 332.45  |
| PF3D7_0817600 | conserved Plasmodium protein, unknown function                                   | 1.40  | 71.77   | 214.04  |
| PF3D7_0817700 | rhostry neck protein 5 (RON5)                                                    | 0.11  | 73.11   | 88.96   |
| PF3D7_0817800 | conserved Plasmodium protein, unknown function                                   | 0.90  | 26.47   | 56.11   |
| PF3D7_0817900 | high mobility group protein B2 (HMGB2)                                           | 0.74  | 487.57  | 920.53  |
| PF3D7_0818000 | conserved protein, unknown function                                              | -1.01 | 179.08  | 100.55  |
| PF3D7_0818100 | zinc finger protein, putative                                                    | 3.53  | 13.87   | 181.21  |
| PF3D7_0818200 | 14-3-3 protein (14-3-3I)                                                         | -0.21 | 1529.68 | 1495.62 |
| PF3D7_0818300 | dynactin subunit 6, putative                                                     | 0.82  | 1.74    | 3.50    |
| PF3D7_0818400 | rRNA-processing protein FCF1, putative (FCF1)                                    | 0.04  | 96.58   | 112.37  |
| PF3D7_0818500 | zinc finger protein, putative                                                    | -0.23 | 433.22  | 416.47  |
| PF3D7_0818600 | BEM46-like protein, putative (PBLP)                                              | 1.29  | 27.43   | 75.88   |
| PF3D7_0818700 | DNA helicase, putative                                                           | -1.58 | 140.84  | 53.22   |
| PF3D7_0818800 | U3 small nucleolar ribonucleoprotein protein IMP4, putative (IMP4)               | -2.22 | 132.34  | 31.98   |
| PF3D7_0818900 | heat shock protein 70 (HSP70)                                                    | -0.08 | 3247.31 | 3467.56 |
| PF3D7_0819000 | conserved Plasmodium protein, unknown function                                   | -1.06 | 107.08  | 58.04   |
| PF3D7_0819100 | BRIX domain, putative                                                            | -1.43 | 55.14   | 23.05   |
| PF3D7_0819200 | perforin-like protein 5 (PLP5)                                                   | -0.97 | 6.13    | 3.54    |
| PF3D7_0819300 | conserved Plasmodium protein, unknown function                                   | 0.00  | 0.72    | 0.82    |
| PF3D7_0819400 | perforin-like protein 4 (PLP4)                                                   | 1.18  | 0.50    | 1.30    |
| PF3D7_0819500 | conserved protein, unknown function                                              | 1.47  | 4.17    | 13.11   |
| PF3D7_0819600 | conserved Plasmodium protein, unknown function                                   | 0.93  | 55.41   | 119.14  |
| PF3D7_0819700 | conserved Plasmodium protein, unknown function                                   | -0.48 | 9.49    | 7.67    |
| PF3D7_0819800 | conserved Plasmodium protein, unknown function                                   | 1.65  | 1.45    | 5.16    |
| PF3D7_0819900 | U6 snRNA-associated Sm-like protein LSM3, putative (LSM3)                        | -0.80 | 23.29   | 15.11   |
| PF3D7_0820000 | Snf2-related CBP activator, putative (SRCAP)                                     | -0.92 | 82.33   | 49.25   |
| PF3D7_0820100 | conserved Plasmodium protein, unknown function                                   | 1.07  | 4.09    | 9.69    |
| PF3D7_0820200 | phosphatidylglycerophosphate synthase (PGPS)                                     | -1.21 | 62.18   | 30.33   |
| PF3D7_0820300 | conserved Plasmodium protein, unknown function                                   | -1.53 | 233.69  | 91.60   |
| PF3D7_0820400 | conserved Plasmodium protein, unknown function                                   | 0.10  | 1.99    | 2.40    |
| PF3D7_0820500 | C-13 antigen                                                                     | -1.66 | 70.86   | 25.23   |
| PF3D7_0820600 | conserved Plasmodium membrane protein, unknown function                          | 0.19  | 4.39    | 5.66    |
| PF3D7_0820700 | 2-oxoglutarate dehydrogenase E1 component (KDH)                                  | 0.64  | 26.40   | 46.48   |
| PF3D7_0820800 | conserved Plasmodium protein, unknown function                                   | 0.35  | 4.18    | 6.01    |
| PF3D7_0820900 | conserved Plasmodium protein, unknown function                                   | -0.67 | 13.32   | 9.48    |
| PF3D7_0821000 | conserved Plasmodium protein, unknown function                                   | -0.60 | 32.88   | 24.52   |
| PF3D7_0821100 | protein kinase 1 (PK1)                                                           | -1.85 | 182.04  | 56.96   |
| PF3D7_0821200 | conserved Plasmodium protein, unknown function                                   | -0.58 | 63.23   | 47.78   |
| PF3D7_0821300 | ATP-dependent RNA helicase prh1, putative                                        | -0.30 | 46.88   | 42.89   |
| PF3D7_0821400 | conserved Plasmodium protein, unknown function                                   | 0.40  | 252.67  | 377.54  |
| PF3D7_0821500 | ribosomal RNA small subunit methyltransferase NEP1, putative (NEP1)              | -1.54 | 72.69   | 18.17   |
| PF3D7_0821600 | clp1-related protein, putative                                                   | -1.75 | 84.76   | 28.48   |
| PF3D7_0821700 | 60S ribosomal protein L22, putative                                              | -1.05 | 496.42  | 269.85  |
| PF3D7_0821800 | protein transport protein SEC61 subunit beta (Sec61-beta)                        | -0.91 | 489.01  | 293.40  |
| PF3D7_0821900 | conserved Plasmodium protein, unknown function                                   | 1.38  | 4.42    | 13.17   |
| PF3D7_0822000 | mitochondrial ribosomal protein L4 precursor, putative                           | 1.05  | 4.82    | 11.32   |
| PF3D7_0822100 | mediator of RNA polymerase II transcription subunit 7, putative (MED7)           | -1.89 | 32.25   | 9.84    |
| PF3D7_0822200 | conserved Plasmodium membrane protein, unknown function                          | -1.71 | 4.07    | 1.40    |
| PF3D7_0822300 | small nuclear ribonucleoprotein G, putative (SNRPG)                              | -2.04 | 48.80   | 13.38   |
| PF3D7_0822400 | conserved Plasmodium protein, unknown function                                   | -0.81 | 9.95    | 6.40    |
| PF3D7_0822500 | dynein light chain 1 (DLC1)                                                      | -0.77 | 8.96    | 5.94    |
| PF3D7_0822600 | protein transport protein SEC23 (SEC23)                                          | -1.16 | 299.97  | 151.56  |
| PF3D7_0822700 | conserved Plasmodium protein, unknown function                                   | -0.69 | 3.50    | 2.44    |
| PF3D7_0822800 | U5 snmp-specific protein, putative                                               | -1.43 | 68.97   | 28.97   |
| PF3D7_0822900 | conserved Plasmodium protein, unknown function                                   | 2.99  | 66.39   | 594.35  |
| PF3D7_0823000 | serine/threonine protein kinase VPS15, putative (VPS15)                          | -0.76 | 5.75    | 3.83    |
| PF3D7_0823100 | RWD domain-containing protein, putative                                          | -1.85 | 73.07   | 22.85   |
| PF3D7_0823200 | RNA-binding protein, putative                                                    | -1.07 | 593.01  | 319.97  |
| PF3D7_0823300 | histone acetyltransferase GCN5 (GCN5)                                            | -0.67 | 128.73  | 91.12   |
| PF3D7_0823400 | alpha/beta hydrolase, putative                                                   | -0.30 | 0.51    | 0.47    |
| PF3D7_0823500 | inner membrane complex protein 1i, putative (IMC1i)                              | 0.46  | 3.04    | 4.73    |
| PF3D7_0823600 | lipoate-protein ligase B (LipB)                                                  | -2.06 | 10.40   | 2.81    |
| PF3D7_0823700 | conserved Plasmodium protein, unknown function                                   | -1.45 | 21.95   | 9.02    |
| PF3D7_0823800 | DnaJ protein, putative                                                           | -1.58 | 75.92   | 28.77   |
| PF3D7_0823900 | dicarboxylate/tricarboxylate carrier (DTC)                                       | 0.10  | 24.60   | 29.80   |



|                 |                                                                         |       |         |         |
|-----------------|-------------------------------------------------------------------------|-------|---------|---------|
| PF3D7_0824000   | conserved Plasmodium protein, unknown function                          | 4.25  | 0.87    | 18.92   |
| PF3D7_0824100   | exonuclease, putative                                                   | 3.63  | 1.71    | 24.02   |
| PF3D7_0824200   | conserved Plasmodium protein, unknown function                          | 1.27  | 2.48    | 6.75    |
| PF3D7_0824300   | GTP-binding protein, putative                                           | 1.02  | 5.79    | 13.28   |
| PF3D7_0824400   | nucleoside transporter 2 (NT2)                                          | 0.07  | 24.62   | 29.09   |
| PF3D7_0824500   | conserved Plasmodium protein, unknown function                          | 0.13  | 11.56   | 14.26   |
| PF3D7_0824600   | Fe-S cluster assembly protein DRE2, putative (DRE2)                     | -1.46 | 55.99   | 22.95   |
| PF3D7_0824700   | lipase maturation factor, putative (LMF1)                               | -0.21 | 4.41    | 4.31    |
| PF3D7_0824800   | conserved Plasmodium membrane protein, unknown function                 | -1.28 | 47.65   | 22.19   |
| PF3D7_0824900   | conserved Plasmodium protein, unknown function                          | -1.41 | 35.54   | 15.14   |
| PF3D7_0825000   | conserved Plasmodium protein, unknown function                          | 0.34  | 15.17   | 21.66   |
| PF3D7_0825100   | conserved Plasmodium protein, unknown function                          | 0.04  | 0.08    | 0.10    |
| PF3D7_0825200   | translation initiation factor IF-3 (IF3a)                               | 0.72  | 6.48    | 12.09   |
| PF3D7_0825300   | conserved protein, unknown function                                     | 0.49  | 11.78   | 18.66   |
| PF3D7_0825400   | conserved Plasmodium protein, unknown function                          | 0.73  | 6.97    | 13.10   |
| PF3D7_0825500   | protein KR11, putative (KR11)                                           | -1.53 | 120.25  | 46.92   |
| PF3D7_0825600   | cytochrome c oxidase assembly protein, putative                         | -0.50 | 15.19   | 12.09   |
| PF3D7_0825700   | conserved Plasmodium protein, unknown function                          | 1.17  | 0.32    | 0.85    |
| PF3D7_0825800   | conserved Plasmodium protein, unknown function                          | 1.75  | 0.70    | 2.72    |
| PF3D7_0825900   | conserved Plasmodium protein, unknown function                          | 1.35  | 0.59    | 1.71    |
| PF3D7_0826000   | conserved Plasmodium protein, unknown function                          | 1.17  | 1.37    | 3.49    |
| PF3D7_0826100   | E3 ubiquitin-protein ligase, putative                                   | -0.58 | 72.12   | 54.30   |
| PF3D7_0826200   | alpha/beta hydrolase, putative                                          | -0.13 | 3.58    | 3.71    |
| PF3D7_0826300   | SPRY domain, putative                                                   | 0.75  | 13.44   | 25.54   |
| PF3D7_0826400   | dehydrodolichyl diphosphate synthetase, putative                        | -0.03 | 11.20   | 12.38   |
| PF3D7_0826500   | ubiquitin conjugation factor E4 B, putative (UBE4B)                     | -0.83 | 65.47   | 41.55   |
| PF3D7_0826600   | SNARE protein, putative (VAMP7)                                         | -0.97 | 10.62   | 6.12    |
| PF3D7_0826700   | receptor for activated c kinase (RACK)                                  | -1.00 | 1208.73 | 682.56  |
| PF3D7_0826800   | small nucleolar RNA snoR05                                              | -0.86 | 6.17    | 3.78    |
| PF3D7_0826900   | conserved Plasmodium protein, unknown function                          | -0.01 | 18.96   | 21.23   |
| PF3D7_0827000   | ATP-dependent RNA helicase DBP10, putative (DBP10)                      | -1.17 | 122.46  | 61.35   |
| PF3D7_0827100   | translation initiation factor IF-2, putative (IF2e)                     | -0.43 | 13.80   | 11.55   |
| PF3D7_0827200   | conserved Plasmodium protein, unknown function                          | 1.15  | 0.18    | 0.46    |
| PF3D7_0827300   | conserved Plasmodium protein, unknown function                          | -0.84 | 50.34   | 31.73   |
| PF3D7_0827400   | conserved Plasmodium protein, unknown function                          | -0.59 | 8.15    | 6.11    |
| PF3D7_0827500   | apicoplast ribosomal protein L21 precursor, putative                    | 0.04  | 18.30   | 21.19   |
| PF3D7_0827600   | conserved Plasmodium protein, unknown function                          | 1.11  | 8.35    | 20.33   |
| PF3D7_0827700   | magnesium transporter, putative                                         | 1.21  | 0.07    | 0.20    |
| PF3D7_0827800   | SET domain protein, putative (SET3)                                     | -0.83 | 70.51   | 44.87   |
| PF3D7_0827900   | protein disulfide isomerase (PDI8)                                      | -0.25 | 749.23  | 711.88  |
| PF3D7_0828000   | rhomboid protease ROM3 (ROM3)                                           | 0.50  | 1.70    | 2.74    |
| PF3D7_0828100   | conserved Plasmodium protein, unknown function                          | 0.32  | 2.12    | 2.99    |
| PF3D7_0828200   | leucine--tRNA ligase, putative                                          | 0.90  | 7.95    | 16.72   |
| PF3D7_0828300   | conserved Plasmodium protein, unknown function                          | 0.54  | 23.76   | 38.98   |
| PF3D7_0828400   | mitochondrial inner membrane protein OXA1, putative (OXA1)              | 0.36  | 2.76    | 4.02    |
| PF3D7_0828500   | translation initiation factor EIF-2b alpha subunit, putative            | 0.21  | 13.32   | 17.43   |
| PF3D7_0828600   | folate transporter 1 (FT1)                                              | 0.61  | 14.70   | 25.37   |
| PF3D7_0828700   | conserved Plasmodium protein, unknown function                          | 0.94  | 5.26    | 11.42   |
| PF3D7_0828800   | GPI-anchored micronemal antigen (GAMA)                                  | 4.30  | 8.37    | 186.17  |
| PF3D7_0828900   | conserved Plasmodium protein, unknown function                          | 1.16  | 32.19   | 81.35   |
| PF3D7_0829000   | conserved Plasmodium membrane protein, unknown function                 | -0.74 | 20.52   | 13.90   |
| PF3D7_0829100   | conserved protein, unknown function                                     | -0.78 | 91.84   | 60.24   |
| PF3D7_0829200   | prohibitin, putative                                                    | 0.84  | 14.60   | 29.53   |
| PF3D7_0829300   | U6 snRNA-associated Sm-like protein LSm8, putative (LSM8)               | -0.21 | 74.51   | 72.62   |
| PF3D7_0829400   | prolyl 4-hydroxylase subunit alpha, putative                            | 1.19  | 10.69   | 27.68   |
| PF3D7_0829500   | conserved Plasmodium protein, unknown function                          | 0.55  | 0.51    | 0.85    |
| PF3D7_0829600   | early transcribed membrane protein 8 (ETRAMP8)                          | 1.00  | 2.97    | 6.76    |
| PF3D7_0829700   | unspecified product                                                     | -1.03 | 1.18    | 0.65    |
| PF3D7_0829800   | unspecified product                                                     | 0.63  | 60.65   | 106.01  |
| PF3D7_0829900   | unspecified product                                                     | 0.35  | 75.34   | 108.41  |
| PF3D7_0830000   | 5.8S ribosomal RNA                                                      | 2.21  | 0.00    | 0.88    |
| PF3D7_0830100   | unspecified product                                                     | 0.27  | 2.18    | 2.97    |
| PF3D7_0830200   | 28S ribosomal RNA                                                       | 2.07  | 0.36    | 1.73    |
| PF3D7_0830300   | sporozoite invasion-associated protein 2 (SIAP2)                        | -0.58 | 5.51    | 4.16    |
| PF3D7_0830400   | conserved Plasmodium protein, unknown function                          | -0.81 | 563.18  | 363.40  |
| PF3D7_0830500   | tryptophan/threonine-rich antigen (TryThrA)                             | 0.70  | 610.25  | 1119.10 |
| PF3D7_0830600   | Plasmodium exported protein (PHISTc), unknown function                  | -1.12 | 649.54  | 337.22  |
| PF3D7_0830700   | Plasmodium exported protein (hyp9), unknown function                    | -0.98 | 57.55   | 32.87   |
| PF3D7_0830800   | surface-associated interspersed protein 8.2 (SURF8.2)                   | 0.56  | 9.77    | 16.32   |
| PF3D7_0830900   | Plasmodium exported protein, unknown function                           | 1.16  | 32.19   | 81.56   |
| PF3D7_0831000   | Plasmodium exported protein (PHISTb), unknown function (GEXP09)         | -1.56 | 14.99   | 5.72    |
| PF3D7_0831100   | surface-associated interspersed protein 8.1 (SURFIN 8.1)                | -0.78 | 2.39    | 1.57    |
| PF3D7_0831200   | DnaJ protein, putative                                                  | -1.30 | 98.50   | 45.23   |
| PF3D7_0831300   | Plasmodium exported protein, unknown function (GEXP13)                  | 1.18  | 5.19    | 13.33   |
| PF3D7_0831400   | Plasmodium exported protein, unknown function                           | 2.23  | 11.83   | 62.80   |
| PF3D7_0831500   | Plasmodium exported protein (PHIST), unknown function                   | -1.44 | 599.28  | 249.20  |
| PF3D7_0831600   | cytoadherence linked asexual protein 8 (CLAG8)                          | -0.44 | 44.37   | 37.06   |
| PF3D7_0831700   | heat shock protein 70 (HSP70-x)                                         | -1.75 | 5185.87 | 1742.56 |
| PF3D7_0831750   | Plasmodium exported protein (PHISTa), unknown function, pseudogene      | -0.53 | 3.00    | 2.34    |
| PF3D7_0831800   | histidine-rich protein II (HRPII)                                       | -2.75 | 9529.46 | 1603.62 |
| PF3D7_0831900   | Plasmodium exported protein (PHIST), unknown function, pseudogene       | -2.26 | 216.84  | 51.03   |
| PF3D7_0832000   | stevor                                                                  | 1.35  | 2.28    | 6.60    |
| PF3D7_0832100   | rifin, pseudogene (RIF)                                                 | 3.40  | 2.42    | 29.16   |
| PF3D7_0832200.1 | Plasmodium exported protein (PHISTa-like), unknown function             | 0.79  | 66.44   | 129.85  |
| PF3D7_0832200.2 | Plasmodium exported protein (PHISTa-like), unknown function             | 0.79  | 64.99   | 126.75  |
| PF3D7_0832300   | Plasmodium exported protein (PHISTa-like), unknown function             | 0.47  | 0.11    | 0.20    |
| PF3D7_0832400   | stevor                                                                  | 0.21  | 0.12    | 0.17    |
| PF3D7_0832500   | rifin (RIF)                                                             | -0.38 | 0.14    | 0.12    |
| PF3D7_0832600   | stevor                                                                  | 1.39  | 0.09    | 0.33    |
| PF3D7_0832700   | Plasmodium exported protein (PHISTa-like), unknown function, pseudogene | -0.65 | 1.80    | 1.29    |
| PF3D7_0832800   | rifin (RIF)                                                             | 0.04  | 0.05    | 0.06    |
| PF3D7_0832900   | stevor                                                                  | 2.08  | 0.02    | 0.21    |
| PF3D7_0833000   | rifin (RIF)                                                             | 3.79  | 0.00    | 0.30    |
| PF3D7_0833100   | rifin (RIF)                                                             | -0.38 | 0.24    | 0.21    |
| PF3D7_0833200   | rifin (RIF)                                                             | 1.93  | 0.29    | 1.33    |
| PF3D7_0833300   | erythrocyte membrane protein 1 (PEMP1), exon 2, pseudogene              | 1.62  | 0.04    | 0.18    |
| PF3D7_0833400   | rifin (RIF)                                                             | -0.76 | 0.35    | 0.23    |
| PF3D7_0833500   | erythrocyte membrane protein 1, PEMP1 (VAR)                             | -0.57 | 1.99    | 1.52    |

|                 |                                                                    |       |         |         |
|-----------------|--------------------------------------------------------------------|-------|---------|---------|
| PF3D7_0900100   | erythrocyte membrane protein 1, PfEMP1 (VAR)                       | 1.12  | 2.29    | 5.66    |
| PF3D7_0900200   | rifin (RIF)                                                        | 0.23  | 7.33    | 9.70    |
| PF3D7_0900300   | rifin (RIF)                                                        | -0.38 | 0.95    | 0.83    |
| PF3D7_0900400   | rifin (RIF)                                                        | 1.71  | 0.69    | 2.63    |
| PF3D7_0900500   | rifin (RIF)                                                        | 1.27  | 1.89    | 5.19    |
| PF3D7_0900600   | rifin (RIF)                                                        | -1.75 | 1.03    | 0.34    |
| PF3D7_0900700   | rifin (RIF)                                                        | 0.76  | 0.08    | 0.17    |
| PF3D7_0900800   | erythrocyte membrane protein 1 (PfEMP1), exon 2, pseudogene (VAR)  | -0.86 | 0.10    | 0.06    |
| PF3D7_0900900   | stevor                                                             | 1.62  | 0.00    | 0.06    |
| PF3D7_0901000   | rifin (RIF)                                                        | 2.79  | 0.00    | 0.17    |
| PF3D7_0901100   | rifin (RIF)                                                        | 3.08  | 0.00    | 0.19    |
| PF3D7_0901200   | Plasmodium exported protein, unknown function, fragment            | -2.38 | 0.32    | 0.00    |
| PF3D7_0901300   | rifin (RIF)                                                        | 0.36  | 0.16    | 0.24    |
| PF3D7_0901400   | rifin (RIF)                                                        | 1.95  | 0.00    | 0.07    |
| PF3D7_0901500   | rifin (RIF)                                                        | 0.65  | 0.57    | 1.03    |
| PF3D7_0901600   | stevor                                                             | 1.48  | 0.17    | 0.60    |
| PF3D7_0901700   | Plasmodium exported protein (hyp5), unknown function               | 0.51  | 18.54   | 29.81   |
| PF3D7_0901800   | Plasmodium exported protein, unknown function                      | 1.43  | 8.10    | 24.66   |
| PF3D7_0901900   | probable protein, unknown function                                 | -1.45 | 8.10    | 3.34    |
| PF3D7_0902000   | serine/threonine protein kinase, FIKK family (FIKK9.1)             | -0.90 | 34.60   | 20.99   |
| PF3D7_0902100   | serine/threonine protein kinase, FIKK family (FIKK9.2)             | 1.22  | 11.59   | 30.42   |
| PF3D7_0902200   | serine/threonine protein kinase, FIKK family (FIKK9.3)             | -1.49 | 61.23   | 24.68   |
| PF3D7_0902300   | serine/threonine protein kinase, FIKK family (FIKK9.4)             | -2.08 | 248.49  | 66.25   |
| PF3D7_0902400   | serine/threonine protein kinase, FIKK family (FIKK9.5)             | -0.54 | 11.51   | 8.96    |
| PF3D7_0902500   | serine/threonine protein kinase, FIKK family (FIKK9.6)             | -1.11 | 303.09  | 158.91  |
| PF3D7_0902600   | serine/threonine protein kinase, FIKK family (FIKK9.7)             | -2.22 | 31.04   | 7.53    |
| PF3D7_0902700   | Plasmodium exported protein (PHISTb), unknown function, pseudogene | 0.78  | 9.03    | 17.54   |
| PF3D7_0902800   | serine repeat antigen 9 (SERA9)                                    | 0.46  | 18.98   | 29.55   |
| PF3D7_0902900   | conserved Plasmodium protein, unknown function                     | 0.71  | 1.59    | 3.03    |
| PF3D7_0903000   | conserved protein, unknown function                                | 0.50  | 10.14   | 16.18   |
| PF3D7_0903100   | protein RER1, putative (RER1)                                      | -1.74 | 46.50   | 15.70   |
| PF3D7_0903200   | ras-related protein RAB7 (RAB7)                                    | 0.72  | 111.49  | 206.99  |
| PF3D7_0903300   | conserved Plasmodium membrane protein, unknown function            | 0.20  | 28.51   | 37.02   |
| PF3D7_0903400   | DEAD/DEAH box helicase, putative                                   | -1.67 | 202.10  | 71.70   |
| PF3D7_0903500   | conserved Plasmodium protein, unknown function                     | -1.14 | 104.58  | 53.65   |
| PF3D7_0903600.1 | conserved Plasmodium protein, unknown function                     | 2.55  | 39.51   | 261.89  |
| PF3D7_0903600.2 | conserved Plasmodium protein, unknown function                     | 2.67  | 17.22   | 124.18  |
| PF3D7_0903700   | alpha tubulin 1                                                    | 0.14  | 121.78  | 151.73  |
| PF3D7_0903800   | LCCL domain-containing protein (CCp4)                              | 0.49  | 0.59    | 0.94    |
| PF3D7_0903900   | 60S ribosomal protein L32 (RPL32)                                  | -1.03 | 1473.91 | 815.84  |
| PF3D7_0904000   | GTPase-activating protein, putative                                | -1.46 | 306.25  | 125.90  |
| PF3D7_0904100   | AP-4 complex subunit epsilon, putative                             | -0.62 | 40.25   | 29.52   |
| PF3D7_0904200   | conserved Plasmodium protein, unknown function                     | 2.16  | 1.07    | 5.52    |
| PF3D7_0904300   | conserved protein, unknown function                                | 0.57  | 0.36    | 0.60    |
| PF3D7_0904400   | signal peptidase complex subunit 3, putative (SPC3)                | 0.22  | 20.23   | 26.55   |
| PF3D7_0904500   | prefoldin subunit 4, putative                                      | 0.08  | 11.31   | 13.54   |
| PF3D7_0904600   | ubiquitin specific protease, putative                              | -0.49 | 69.75   | 56.14   |
| PF3D7_0904700   | bacterial histone-like protein (HU)                                | -0.25 | 22.01   | 20.86   |
| PF3D7_0904800   | replication protein A1, small fragment (RPA1)                      | 0.09  | 53.37   | 64.02   |
| PF3D7_0904900   | copper-transporting ATPase (CuTP)                                  | 0.56  | 26.89   | 44.69   |
| PF3D7_0905000   | conserved Plasmodium protein, unknown function                     | -1.13 | 3.18    | 1.64    |
| PF3D7_0905100   | nucleoporin NUP100/NSP100, putative (NUP100)                       | -0.88 | 48.83   | 30.02   |
| PF3D7_0905200   | mitochondrial carrier protein, putative                            | -1.71 | 40.44   | 13.97   |
| PF3D7_0905300   | dynein heavy chain, putative                                       | 0.91  | 0.78    | 1.67    |
| PF3D7_0905400   | high molecular weight rhostry protein 3 (RhopH3)                   | 0.57  | 630.58  | 1055.68 |
| PF3D7_0905500   | conserved Plasmodium protein, unknown function                     | 1.22  | 17.55   | 46.37   |
| PF3D7_0905600   | WD repeat-containing protein 66, putative (WDR66)                  | 0.33  | 0.32    | 0.46    |
| PF3D7_0905700.1 | autophagy-related protein 3, putative (ATG3)                       | 0.08  | 25.53   | 30.49   |
| PF3D7_0905700.2 | autophagy-related protein 3, putative (ATG3)                       | 0.10  | 25.37   | 30.64   |
| PF3D7_0905700.3 | autophagy-related protein 3, putative                              | -0.36 | 19.87   | 17.45   |
| PF3D7_0905800   | conserved Plasmodium protein, unknown function                     | -1.45 | 34.19   | 14.17   |
| PF3D7_0905900   | coatamer subunit beta, putative (SEC27)                            | -1.69 | 67.46   | 23.65   |
| PF3D7_0906000   | exoribonuclease II (RNaseII)                                       | 0.76  | 3.51    | 6.70    |
| PF3D7_0906100   | vacuolar protein sorting-associated protein 46, putative (VPS46)   | 1.14  | 18.13   | 45.18   |
| PF3D7_0906200   | conserved Plasmodium protein, unknown function                     | -0.91 | 5.70    | 3.42    |
| PF3D7_0906300   | Maf-like protein, putative                                         | -1.88 | 30.14   | 9.26    |
| PF3D7_0906400   | dynein light intermediate chain 2, cytosolic                       | -0.07 | 3.37    | 3.64    |
| PF3D7_0906500   | arginase                                                           | -0.15 | 113.50  | 115.18  |
| PF3D7_0906600   | zinc finger protein, putative                                      | -1.50 | 260.87  | 103.95  |
| PF3D7_0906700   | leucine-rich repeat protein (LRR9)                                 | -1.48 | 22.23   | 8.98    |
| PF3D7_0906800   | probable protein, unknown function                                 | -1.33 | 6.10    | 2.74    |
| PF3D7_0906890   | conserved Plasmodium protein, unknown function                     | -1.77 | 18.19   | 5.99    |
| PF3D7_0906910   | tubulin-specific chaperone, putative                               | -0.98 | 53.26   | 30.58   |
| PF3D7_0907000   | conserved Plasmodium protein, unknown function                     | -1.71 | 47.10   | 16.20   |
| PF3D7_0907100   | conserved Plasmodium protein, unknown function                     | 0.44  | 2.79    | 4.28    |
| PF3D7_0907200   | GTPase-activating protein, putative                                | -1.75 | 112.94  | 37.97   |
| PF3D7_0907300   | conserved Plasmodium protein, unknown function                     | -0.21 | 13.95   | 13.60   |
| PF3D7_0907400   | ATP-dependent protease ATPase subunit ClpY (ClpY)                  | -0.44 | 109.51  | 91.25   |
| PF3D7_0907500   | conserved Plasmodium protein, unknown function                     | 1.02  | 21.60   | 49.65   |
| PF3D7_0907600   | translation initiation factor SU11, putative                       | -0.81 | 48.98   | 31.48   |
| PF3D7_0907700   | subunit of proteasome activator complex, putative                  | -1.26 | 492.07  | 232.07  |
| PF3D7_0907800   | apicoplast ribosomal protein L35 precursor, putative               | 0.05  | 44.10   | 51.40   |
| PF3D7_0907900   | peptide deformylase (PDF)                                          | 0.69  | 18.02   | 32.83   |
| PF3D7_0908000   | P1 nuclease, putative                                              | -0.56 | 37.58   | 28.89   |
| PF3D7_0908100   | conserved Plasmodium membrane protein, unknown function            | 0.81  | 2.27    | 4.52    |
| PF3D7_0908200   | conserved Plasmodium protein, unknown function                     | 1.02  | 8.68    | 19.90   |
| PF3D7_0908300.1 | conserved Plasmodium membrane protein, unknown function            | 0.81  | 6.44    | 12.74   |
| PF3D7_0908300.2 | conserved Plasmodium membrane protein, unknown function            | 0.79  | 6.59    | 12.94   |
| PF3D7_0908400   | conserved Plasmodium protein, unknown function                     | -1.18 | 15.81   | 7.89    |
| PF3D7_0908500   | conserved Plasmodium protein, unknown function                     | 1.36  | 9.35    | 27.14   |
| PF3D7_0908600   | ribosomal RNA methyltransferase, putative                          | -1.31 | 35.26   | 16.06   |
| PF3D7_0908700   | tRNA pseudouridine synthase, putative                              | -0.61 | 16.20   | 11.96   |
| PF3D7_0908800   | transporter, putative                                              | -1.05 | 38.60   | 20.99   |
| PF3D7_0908900   | conserved Plasmodium protein, unknown function                     | -0.15 | 7.94    | 8.11    |
| PF3D7_0909000   | conserved Plasmodium protein, unknown function                     | 0.63  | 1.72    | 3.03    |
| PF3D7_0909100   | conserved Plasmodium membrane protein, unknown function            | 0.49  | 3.68    | 5.85    |
| PF3D7_0909200   | GDP-fucose protein O-fucosyltransferase 2, putative (POFUT2)       | 1.30  | 0.83    | 2.32    |
| PF3D7_0909300   | apoptosis-related protein (ARP)                                    | -0.97 | 163.30  | 94.10   |

|                 |                                                                                        |       |         |         |
|-----------------|----------------------------------------------------------------------------------------|-------|---------|---------|
| PF3D7_0909400   | exoribonuclease, putative                                                              | -1.39 | 124.47  | 53.55   |
| PF3D7_0909500   | subpellicular microtubule protein 1, putative (SPM1)                                   | 0.84  | 20.89   | 42.15   |
| PF3D7_0909600   | conserved Plasmodium protein, unknown function                                         | 0.35  | 18.08   | 26.09   |
| PF3D7_0909700   | FHA domain protein, putative                                                           | -1.41 | 150.31  | 64.00   |
| PF3D7_0909800   | small nuclear ribonucleoprotein Sm D3, putative (SNRPD3)                               | -1.32 | 153.22  | 69.08   |
| PF3D7_0909900   | helicase with Zn-finger motif, putative                                                | -1.11 | 44.92   | 23.50   |
| PF3D7_0910000   | SET domain protein, putative (SET4)                                                    | 0.31  | 2.20    | 3.08    |
| PF3D7_0910100   | Ran-binding protein, putative                                                          | -1.09 | 73.09   | 38.72   |
| PF3D7_0910200   | conserved Plasmodium protein, unknown function                                         | -0.37 | 38.18   | 33.33   |
| PF3D7_0910300   | conserved Plasmodium protein, unknown function                                         | -0.97 | 25.64   | 14.76   |
| PF3D7_0910400   | selenide water dikinase, putative                                                      | 0.09  | 9.67    | 11.62   |
| PF3D7_0910500   | DNA repair protein REV1, putative                                                      | -0.52 | 41.00   | 32.24   |
| PF3D7_0910600   | SNARE protein (YKT6.1)                                                                 | 0.87  | 17.06   | 35.15   |
| PF3D7_0910700   | actin-like protein, putative (ALP5a)                                                   | 0.22  | 3.25    | 4.28    |
| PF3D7_0910800   | cytosolic Fe-S cluster assembly factor NBP35, putative (NBP35)                         | -0.29 | 32.67   | 30.09   |
| PF3D7_0910900   | DNA primase large subunit, putative                                                    | 0.41  | 12.64   | 18.97   |
| PF3D7_0911000   | phosphatidylinositol N-acetylglucosaminyltransferase, putative                         | 0.67  | 11.80   | 21.22   |
| PF3D7_0911100   | conserved Plasmodium protein, unknown function                                         | 3.94  | 14.41   | 250.42  |
| PF3D7_0911200   | conserved Plasmodium protein, unknown function                                         | -0.03 | 5.43    | 6.00    |
| PF3D7_0911300   | cysteine repeat modular protein 1 (CRMP1)                                              | 1.39  | 0.26    | 0.78    |
| PF3D7_0911400   | conserved Plasmodium protein, unknown function                                         | -0.36 | 11.31   | 9.94    |
| PF3D7_0911500.1 | conserved Plasmodium protein, unknown function                                         | 0.05  | 2.42    | 2.84    |
| PF3D7_0911500.2 | conserved Plasmodium protein, unknown function                                         | -0.11 | 2.34    | 2.47    |
| PF3D7_0911600   | conserved Plasmodium protein, unknown function                                         | 1.08  | 11.05   | 26.46   |
| PF3D7_0911700   | GTP-binding protein, putative                                                          | 0.26  | 16.22   | 22.00   |
| PF3D7_0911800   | conserved Plasmodium protein, unknown function                                         | 0.20  | 22.29   | 28.87   |
| PF3D7_0911900   | falstatin (ICP)                                                                        | -0.58 | 416.79  | 314.72  |
| PF3D7_0912000   | conserved Plasmodium protein, unknown function                                         | -1.32 | 19.62   | 8.88    |
| PF3D7_0912100   | zinc finger protein, putative                                                          | -1.17 | 42.58   | 21.33   |
| PF3D7_0912200   | conserved Plasmodium membrane protein, unknown function                                | -1.05 | 11.87   | 6.48    |
| PF3D7_0912400   | alkaline phosphatase, putative                                                         | -0.97 | 110.11  | 63.44   |
| PF3D7_0912500   | conserved Plasmodium protein, unknown function                                         | -0.53 | 196.64  | 154.15  |
| PF3D7_0912600   | conserved Plasmodium protein, unknown function                                         | 0.06  | 1.95    | 2.29    |
| PF3D7_0912700   | conserved Plasmodium protein, unknown function                                         | 0.12  | 6.42    | 7.93    |
| PF3D7_0912800   | tRNA (adenine(58)-N(1))-methyltransferase non-catalytic subunit TRM6, putative (GCD10) | -1.37 | 50.63   | 22.09   |
| PF3D7_0912900   | 26S proteasome regulatory subunit RPN8, putative (RPN8)                                | -0.76 | 159.88  | 106.29  |
| PF3D7_0913000   | conserved protein, unknown function                                                    | -0.92 | 206.54  | 123.13  |
| PF3D7_0913100   | conserved Plasmodium protein, unknown function                                         | 0.15  | 1.97    | 2.48    |
| PF3D7_0913200   | elongation factor 1-beta (EF-1beta)                                                    | -0.86 | 522.50  | 324.82  |
| PF3D7_0913300   | conserved Plasmodium protein, unknown function                                         | -2.01 | 156.86  | 43.99   |
| PF3D7_0913400   | conserved Plasmodium protein, unknown function                                         | 0.69  | 6.80    | 12.46   |
| PF3D7_0913500   | protease, putative                                                                     | -0.51 | 16.30   | 12.92   |
| PF3D7_0913600   | conserved Plasmodium protein, unknown function                                         | 0.61  | 6.27    | 10.84   |
| PF3D7_0913700   | conserved Plasmodium protein, unknown function                                         | 0.20  | 31.83   | 41.38   |
| PF3D7_0913800   | conserved Plasmodium protein, unknown function                                         | 3.07  | 15.53   | 148.08  |
| PF3D7_0913900   | arginine-tRNA ligase, putative                                                         | -0.36 | 12.28   | 10.83   |
| PF3D7_0914000   | pseudouridylylase, putative                                                            | -0.09 | 22.27   | 23.55   |
| PF3D7_0914100   | conserved Plasmodium protein, unknown function                                         | 2.60  | 15.53   | 106.29  |
| PF3D7_0914200   | phospholipid or glycerol acyltransferase, putative                                     | -1.03 | 117.74  | 64.95   |
| PF3D7_0914300   | met-10+ like protein, putative                                                         | -1.48 | 53.62   | 21.78   |
| PF3D7_0914400   | conserved Plasmodium protein, unknown function                                         | 0.18  | 38.86   | 49.69   |
| PF3D7_0914500   | conserved Plasmodium protein, unknown function                                         | 0.01  | 19.24   | 21.92   |
| PF3D7_0914600   | zinc binding protein, putative                                                         | -0.62 | 34.73   | 25.47   |
| PF3D7_0914700   | transporter, putative                                                                  | -3.04 | 443.39  | 60.87   |
| PF3D7_0914800   | GINS complex subunit Psf3, putative                                                    | -0.27 | 22.83   | 21.32   |
| PF3D7_0914900   | BSD-domain protein, putative                                                           | -0.37 | 33.73   | 29.54   |
| PF3D7_0915000   | type II NADH:ubiquinone oxidoreductase (NDH2)                                          | 0.72  | 19.14   | 35.60   |
| PF3D7_0915100   | SUMO-conjugating enzyme UBC9 (UBC9)                                                    | -1.17 | 125.86  | 63.34   |
| PF3D7_0915200   | ribonuclease H2 subunit C, putative                                                    | -1.19 | 7.84    | 3.86    |
| PF3D7_0915300   | conserved Plasmodium protein, unknown function                                         | -0.15 | 3.92    | 4.00    |
| PF3D7_0915400   | 6-phosphofructokinase (PFK9)                                                           | -1.43 | 637.29  | 267.52  |
| PF3D7_0915500   | conserved Plasmodium protein, unknown function                                         | -0.30 | 0.98    | 0.90    |
| PF3D7_0915600   | conserved Plasmodium protein, unknown function                                         | -1.38 | 47.55   | 20.63   |
| PF3D7_0915700   | conserved Plasmodium protein, unknown function                                         | 0.22  | 17.76   | 23.42   |
| PF3D7_0915800   | glycolipid transfer protein, putative (GLTP)                                           | 0.14  | 3.46    | 4.32    |
| PF3D7_0915900   | conserved Plasmodium protein, unknown function                                         | -1.10 | 62.64   | 33.03   |
| PF3D7_0916000   | sugar transporter, putative                                                            | 0.97  | 25.09   | 55.44   |
| PF3D7_0916100   | thioredoxin 3 (TRX3)                                                                   | -0.55 | 20.05   | 15.51   |
| PF3D7_0916200   | conserved Plasmodium protein, unknown function                                         | -0.23 | 10.70   | 10.31   |
| PF3D7_0916300   | conserved Plasmodium protein, unknown function                                         | 0.87  | 4.28    | 8.89    |
| PF3D7_0916400   | conserved Plasmodium protein, unknown function                                         | 0.11  | 7.83    | 9.53    |
| PF3D7_0916500   | ubiquitin fusion degradation protein 1 (UFD1)                                          | 1.69  | 11.09   | 40.40   |
| PF3D7_0916600   | methyltransferase, putative                                                            | -1.71 | 38.72   | 13.35   |
| PF3D7_0916700   | RNA-binding protein musashi, putative (HoMu)                                           | -1.36 | 887.77  | 390.36  |
| PF3D7_0916800   | conserved Plasmodium protein, unknown function                                         | -0.20 | 39.87   | 39.11   |
| PF3D7_0916900   | conserved Plasmodium protein, unknown function                                         | -1.57 | 81.10   | 30.90   |
| PF3D7_0917000   | conserved Plasmodium protein, unknown function                                         | -0.03 | 16.73   | 18.45   |
| PF3D7_0917100   | N-glycosylase/DNA lyase, putative (OGG1)                                               | -0.15 | 15.85   | 16.09   |
| PF3D7_0917200   | conserved Plasmodium membrane protein, unknown function                                | 0.68  | 3.01    | 5.46    |
| PF3D7_0917300   | conserved Plasmodium membrane protein, unknown function                                | 0.60  | 12.69   | 21.82   |
| PF3D7_0917400   | conserved Plasmodium protein, unknown function                                         | 0.39  | 5.18    | 7.65    |
| PF3D7_0917500   | conserved Plasmodium protein, unknown function                                         | 0.51  | 14.93   | 24.07   |
| PF3D7_0917600   | pre-mRNA-splicing factor ATP-dependent RNA helicase PRP43, putative (PRP43)            | -1.03 | 98.37   | 54.47   |
| PF3D7_0917700   | XPA binding protein 1, putative                                                        | -1.79 | 10.21   | 3.33    |
| PF3D7_0917800   | conserved Plasmodium protein, unknown function                                         | -1.96 | 13.47   | 3.90    |
| PF3D7_0917900   | heat shock protein 70 (HSP70-2)                                                        | -0.35 | 1904.55 | 1684.28 |
| PF3D7_0918000   | glideosome-associated protein 50 (GAP50)                                               | 0.87  | 236.67  | 487.44  |
| PF3D7_0918100   | cytochrome b5-like heme/steroid binding protein, putative                              | -0.53 | 122.54  | 95.96   |
| PF3D7_0918200   | 50S ribosomal protein L3, apicoplast, putative                                         | -0.50 | 61.28   | 49.07   |
| PF3D7_0918300   | eukaryotic translation initiation factor 3 subunit F, putative (EIF3F)                 | -1.49 | 148.80  | 59.67   |
| PF3D7_0918400   | conserved Plasmodium protein, unknown function                                         | 0.52  | 0.87    | 1.41    |
| PF3D7_0918500   | telomerase RNA (TR)                                                                    | 0.21  | 14.15   | 18.46   |
| PF3D7_0918600   | ATP-dependent DNA helicase Q1 (RECQ1)                                                  | -1.46 | 7.77    | 3.19    |
| PF3D7_0918700   | conserved Plasmodium protein, unknown function                                         | 1.01  | 48.84   | 110.84  |
| PF3D7_0918800   | dihydrouridine synthase, putative                                                      | -1.46 | 57.63   | 23.58   |
| PF3D7_0918900   | gamma-glutamylcysteine synthetase (gammaGCS)                                           | -0.95 | 132.29  | 77.11   |
| PF3D7_0919000   | nucleosome assembly protein (NAPS)                                                     | -1.01 | 1332.34 | 748.57  |
| PF3D7_0919100   | DnaJ protein, putative                                                                 | -0.68 | 201.11  | 142.05  |

|                 |                                                                          |       |         |        |
|-----------------|--------------------------------------------------------------------------|-------|---------|--------|
| PF3D7_0919200   | PPPDE peptidase, putative                                                | 3.46  | 10.11   | 125.82 |
| PF3D7_0919300   | thioredoxin-like protein 1, putative (TrxL1)                             | 3.49  | 8.51    | 108.20 |
| PF3D7_0919400   | protein disulfide isomerase (PDI9)                                       | 0.12  | 27.61   | 33.81  |
| PF3D7_0919500   | sugar transporter, putative                                              | 0.57  | 2.44    | 4.11   |
| PF3D7_0919600   | dolichyl-diphosphooligosaccharide--protein glycosyltransferase, putative | 0.13  | 4.03    | 5.00   |
| PF3D7_0919700   | pyridoxal 5'-phosphate dependent enzyme class III, putative              | -1.31 | 19.94   | 9.06   |
| PF3D7_0919800   | TLD domain-containing protein                                            | 0.27  | 40.49   | 55.33  |
| PF3D7_0919900   | regulator of chromosome condensation, putative                           | 0.68  | 32.15   | 58.22  |
| PF3D7_0920000   | long chain fatty acid elongation enzyme, putative (ELO3)                 | 0.88  | 5.39    | 11.17  |
| PF3D7_0920100   | chaperone, putative                                                      | -0.49 | 15.35   | 12.34  |
| PF3D7_0920200   | CS domain protein, putative                                              | 0.42  | 12.93   | 19.52  |
| PF3D7_0920300   | conserved Plasmodium protein, unknown function                           | -0.54 | 2.18    | 1.69   |
| PF3D7_0920400   | conserved Plasmodium protein, unknown function                           | -0.47 | 7.51    | 6.12   |
| PF3D7_0920500   | ADP-ribosylation factor, putative                                        | 2.01  | 30.61   | 139.82 |
| PF3D7_0920600   | conserved Plasmodium protein, unknown function                           | 1.23  | 5.34    | 14.20  |
| PF3D7_0920700   | conserved Plasmodium protein, unknown function                           | 2.04  | 33.83   | 156.90 |
| PF3D7_0920800   | inosine-5'-monophosphate dehydrogenase (IMPDH)                           | -1.75 | 311.10  | 104.41 |
| PF3D7_0920900   | U4/U6 snRNA-associated-splicing factor, putative (PRP24)                 | -1.03 | 44.13   | 24.46  |
| PF3D7_0921000.1 | ubiquitin-conjugating enzyme, putative                                   | -0.37 | 54.77   | 47.78  |
| PF3D7_0921000.2 | ubiquitin-conjugating enzyme, putative                                   | -0.29 | 48.81   | 45.04  |
| PF3D7_0921100   | conserved Plasmodium protein, unknown function                           | -0.40 | 4.53    | 3.88   |
| PF3D7_0921200   | conserved Plasmodium membrane protein, unknown function                  | -1.64 | 32.37   | 11.71  |
| PF3D7_0921300   | conserved Plasmodium protein, unknown function                           | -0.82 | 8.62    | 5.50   |
| PF3D7_0921400   | NifU-like scaffold protein, putative (NifU)                              | 1.06  | 2.02    | 4.79   |
| PF3D7_0921500   | conserved Plasmodium protein, unknown function                           | 0.49  | 0.48    | 0.77   |
| PF3D7_0921600   | tetratricopeptide repeat family protein, putative                        | -1.11 | 15.68   | 8.20   |
| PF3D7_0921700   | conserved Plasmodium protein, unknown function                           | 0.23  | 11.04   | 14.59  |
| PF3D7_0921800   | ribosome production factor 1, putative (RPF1)                            | -1.89 | 79.48   | 24.15  |
| PF3D7_0921900   | conserved Plasmodium protein, unknown function                           | -0.74 | 264.75  | 178.99 |
| PF3D7_0922000   | dynein intermediate chain, putative                                      | 0.90  | 0.75    | 1.61   |
| PF3D7_0922100   | ubiquitin-like protein, putative                                         | -1.26 | 230.55  | 108.42 |
| PF3D7_0922200   | S-adenosylmethionine synthetase (SAMS)                                   | -0.84 | 1425.39 | 901.72 |
| PF3D7_0922300   | conserved Plasmodium protein, unknown function                           | 1.83  | 1.04    | 4.24   |
| PF3D7_0922400   | para-aminobenzoic acid synthetase (pBAS)                                 | 0.53  | 2.35    | 3.84   |
| PF3D7_0922500   | phosphoglycerate kinase (PGK)                                            | -1.41 | 710.75  | 303.04 |
| PF3D7_0922600   | glutamine synthetase, putative                                           | -2.17 | 423.11  | 106.47 |
| PF3D7_0922700   | pre-mRNA-splicing factor 18, putative (PRP18)                            | -0.30 | 57.82   | 53.03  |
| PF3D7_0922800   | conserved Plasmodium protein, unknown function                           | 0.32  | 5.42    | 7.67   |
| PF3D7_0922900   | 3-oxoacyl-[acyl-carrier-protein] reductase (FabG)                        | 1.04  | 3.44    | 8.00   |
| PF3D7_0923000   | DNA-directed RNA polymerase II subunit RPB3, putative (RPB3)             | -1.61 | 60.18   | 22.24  |
| PF3D7_0923100   | OTU-like cysteine protease, putative                                     | -1.36 | 6.19    | 2.71   |
| PF3D7_0923200   | flavodoxin-like protein (CPR)                                            | -1.50 | 65.93   | 26.31  |
| PF3D7_0923300   | perforin-like protein 3 (PLP3)                                           | -1.14 | 13.54   | 6.94   |
| PF3D7_0923400   | conserved Plasmodium protein, unknown function                           | -0.80 | 34.11   | 22.11  |
| PF3D7_0923500   | cyclin-dependent kinases regulatory subunit, putative                    | -0.14 | 6.88    | 7.04   |
| PF3D7_0923600   | lipoate-protein ligase 2 (LipL2)                                         | 0.01  | 2.85    | 3.24   |
| PF3D7_0923700   | conserved protein, unknown function                                      | 1.59  | 0.24    | 0.88   |
| PF3D7_0923800.1 | thioredoxin reductase (TRXR)                                             | 1.00  | 29.76   | 67.25  |
| PF3D7_0923800.2 | thioredoxin reductase (TRXR)                                             | 0.99  | 33.23   | 74.71  |
| PF3D7_0923900   | RNA-binding protein, putative                                            | -0.71 | 187.18  | 129.55 |
| PF3D7_0924000   | patatin-like phospholipase, putative                                     | -0.08 | 73.40   | 78.23  |
| PF3D7_0924100   | conserved Plasmodium protein, unknown function                           | -0.12 | 11.32   | 11.79  |
| PF3D7_0924200   | conserved Plasmodium protein, unknown function                           | -0.74 | 9.51    | 6.44   |
| PF3D7_0924300   | thiamine pyrophosphokinase (TPK)                                         | 1.56  | 5.98    | 19.96  |
| PF3D7_0924400   | conserved Plasmodium protein, unknown function                           | 0.61  | 97.32   | 167.82 |
| PF3D7_0924500   | conserved Plasmodium membrane protein, unknown function                  | 0.34  | 11.41   | 16.36  |
| PF3D7_0924600   | conserved Plasmodium protein, unknown function                           | 0.60  | 7.20    | 12.34  |
| PF3D7_0924700   | splicing factor 3A subunit 3, putative (SF3A3)                           | -1.07 | 55.96   | 30.03  |
| PF3D7_0924800   | telomeric repeat binding factor 1, putative (TRF1)                       | -0.28 | 1.14    | 1.07   |
| PF3D7_0924900   | alpha-tubulin N-acetyltransferase, putative                              | 0.29  | 1.61    | 2.25   |
| PF3D7_0925000   | conserved Plasmodium protein, unknown function                           | 2.42  | 0.88    | 5.50   |
| PF3D7_0925100   | conserved Plasmodium protein, unknown function                           | 0.38  | 3.44    | 5.07   |
| PF3D7_0925200   | ribosomal RNA-processing protein 8, putative (RRP8)                      | -1.66 | 81.57   | 29.17  |
| PF3D7_0925300   | proline--tRNA ligase, putative (aPRS)                                    | 0.20  | 11.65   | 15.08  |
| PF3D7_0925400   | protein phosphatase-beta                                                 | 0.08  | 5.48    | 6.55   |
| PF3D7_0925500   | thioredoxin-like protein 2 (TLP2)                                        | 0.89  | 18.64   | 39.13  |
| PF3D7_0925600   | zinc binding protein (Yippee), putative                                  | 1.20  | 9.38    | 24.38  |
| PF3D7_0925700   | histone deacetylase 1 (HDAC1)                                            | -1.27 | 200.35  | 93.55  |
| PF3D7_0925800   | conserved Plasmodium protein, unknown function                           | -0.15 | 12.13   | 12.33  |
| PF3D7_0925900   | conserved Plasmodium protein, unknown function                           | -0.92 | 1524.13 | 912.29 |
| PF3D7_0926000   | protein kinase, putative                                                 | -0.09 | 6.08    | 6.45   |
| PF3D7_0926100   | protein kinase, putative                                                 | -1.68 | 200.34  | 70.69  |
| PF3D7_0926200   | conserved Plasmodium protein, unknown function                           | 1.01  | 6.61    | 15.24  |
| PF3D7_0926300   | protein kinase, putative                                                 | 1.46  | 3.49    | 10.87  |
| PF3D7_0926400   | monocarboxylate transporter, putative                                    | -0.94 | 39.26   | 23.11  |
| PF3D7_0926500   | conserved Plasmodium protein, unknown function                           | 1.25  | 14.17   | 37.94  |
| PF3D7_0926600   | conserved Plasmodium membrane protein, unknown function                  | 2.58  | 1.01    | 6.82   |
| PF3D7_0926700   | glutamine-dependent NAD(+) synthetase, putative (NADSYN)                 | -0.73 | 40.75   | 27.67  |
| PF3D7_0926800   | conserved Plasmodium protein, unknown function                           | 1.93  | 7.40    | 31.96  |
| PF3D7_0926900   | replication termination factor, putative                                 | -0.03 | 26.73   | 29.55  |
| PF3D7_0927000   | CS domain protein, putative                                              | -0.08 | 37.52   | 40.18  |
| PF3D7_0927100   | conserved Plasmodium protein, unknown function                           | 0.73  | 6.69    | 12.56  |
| PF3D7_0927200   | zinc finger protein, putative                                            | 2.50  | 2.59    | 16.63  |
| PF3D7_0927300   | fumarate hydratase, putative (FH)                                        | 0.83  | 13.95   | 28.08  |
| PF3D7_0927400   | conserved Plasmodium protein, unknown function                           | 1.12  | 1.00    | 2.46   |
| PF3D7_0927500   | dynein light chain, putative                                             | 1.71  | 1.98    | 7.53   |
| PF3D7_0927600   | conserved Plasmodium protein, unknown function                           | 1.45  | 32.76   | 100.80 |
| PF3D7_0927700   | serine/threonine protein phosphatase 4, putative (PPP4)                  | 0.31  | 14.60   | 20.45  |
| PF3D7_0927800   | cytochrome c oxidase subunit 5B, putative (COX5B)                        | 0.81  | 33.65   | 66.68  |
| PF3D7_0927900   | phosphatidylserine decarboxylase (PSD)                                   | -1.54 | 193.20  | 74.80  |
| PF3D7_0928000.1 | cytochrome c oxidase subunit 6B, putative (COX6B)                        | 0.93  | 38.70   | 83.46  |
| PF3D7_0928000.2 | cytochrome c oxidase subunit 6B, putative (COX6B)                        | 0.84  | 39.02   | 79.20  |
| PF3D7_0928100   | conserved Plasmodium protein, unknown function                           | 0.92  | 1.75    | 3.74   |
| PF3D7_0928200   | conserved Plasmodium protein, unknown function                           | -1.83 | 46.24   | 14.65  |
| PF3D7_0928300   | conserved Plasmodium protein, unknown function                           | -0.82 | 15.95   | 10.20  |
| PF3D7_0928400   | conserved Plasmodium membrane protein, unknown function                  | -0.97 | 68.36   | 39.38  |
| PF3D7_0928500   | conserved Plasmodium protein, unknown function                           | -1.17 | 21.58   | 10.81  |
| PF3D7_0928600   | conserved Plasmodium protein, unknown function                           | 0.11  | 20.11   | 24.45  |

|                 |                                                                          |       |         |         |
|-----------------|--------------------------------------------------------------------------|-------|---------|---------|
| PF3D7_0928700   | conserved Plasmodium protein, unknown function                           | 1.03  | 1.38    | 3.18    |
| PF3D7_0928800   | serine/threonine protein kinase, putative                                | 0.97  | 3.25    | 7.18    |
| PF3D7_0928900   | guanylate kinase (GK)                                                    | -1.79 | 43.49   | 14.20   |
| PF3D7_0929000   | transcription initiation factor TFIIID subunit 7, putative (TAF7)        | -1.47 | 53.90   | 22.04   |
| PF3D7_0929100   | conserved Plasmodium protein, unknown function                           | 0.79  | 7.38    | 14.44   |
| PF3D7_0929200   | RNA-binding protein, putative                                            | -1.16 | 242.79  | 123.08  |
| PF3D7_0929300   | conserved Plasmodium protein, unknown function                           | 0.76  | 4.96    | 9.52    |
| PF3D7_0929400   | high molecular weight rhoptry protein 2 (RhopH2)                         | -0.01 | 265.14  | 297.89  |
| PF3D7_0929500   | conserved protein, unknown function                                      | 0.74  | 0.39    | 0.77    |
| PF3D7_0929600   | G2 protein, putative                                                     | 1.88  | 10.64   | 44.22   |
| PF3D7_0929700   | conserved Plasmodium protein, unknown function                           | 0.24  | 3.28    | 4.39    |
| PF3D7_0929800   | conserved Plasmodium protein, unknown function                           | -0.86 | 0.45    | 0.26    |
| PF3D7_0929900   | conserved Plasmodium protein, unknown function                           | 0.50  | 4.16    | 6.67    |
| PF3D7_0930000   | procollagen lysine 5-dioxygenase, putative                               | 2.61  | 0.19    | 1.37    |
| PF3D7_0930100   | conserved Plasmodium protein, unknown function                           | 0.94  | 9.72    | 21.03   |
| PF3D7_0930200   | leucine-rich repeat protein (LRR8)                                       | 1.12  | 18.13   | 44.54   |
| PF3D7_0930300   | merozoite surface protein 1 (MSP1)                                       | 2.26  | 845.51  | 4574.47 |
| PF3D7_0930400.1 | conserved Plasmodium protein, unknown function                           | -0.80 | 77.18   | 50.14   |
| PF3D7_0930400.2 | conserved Plasmodium protein, unknown function                           | -0.79 | 77.35   | 50.50   |
| PF3D7_0930500   | diacylglycerol kinase, putative (DGK1)                                   | 0.09  | 45.19   | 54.43   |
| PF3D7_0930600   | peptidyl-prolyl cis-trans isomerase (CYP72)                              | -1.40 | 29.74   | 12.73   |
| PF3D7_0930700   | conserved Plasmodium protein, unknown function                           | -1.30 | 14.50   | 6.64    |
| PF3D7_0930800   | conserved Plasmodium membrane protein, unknown function                  | 0.26  | 10.79   | 14.58   |
| PF3D7_0930900   | NifU-like protein, putative (IscU2)                                      | 0.71  | 4.02    | 7.47    |
| PF3D7_0931000   | elongation factor Tu, putative                                           | -1.26 | 30.50   | 14.34   |
| PF3D7_0931100   | nucleolar protein Nop52, putative                                        | -0.37 | 88.33   | 77.04   |
| PF3D7_0931200   | selenoprotein (Sel2)                                                     | -2.42 | 19.35   | 4.07    |
| PF3D7_0931300   | asparagine-rich antigen, putative                                        | -0.14 | 8.42    | 8.64    |
| PF3D7_0931400   | conserved Plasmodium protein, unknown function                           | 0.62  | 36.92   | 64.28   |
| PF3D7_0931500   | conserved Plasmodium protein, unknown function                           | -0.35 | 24.78   | 21.88   |
| PF3D7_0931600   | conserved protein, unknown function                                      | 2.62  | 0.03    | 0.39    |
| PF3D7_0931700   | PIH1 domain-containing protein, putative                                 | 1.44  | 1.13    | 3.47    |
| PF3D7_0931800   | proteasome subunit beta type-6, putative                                 | -0.35 | 129.15  | 114.21  |
| PF3D7_0931900   | adenylate kinase-like protein 2 (AKLP2)                                  | 1.94  | 4.78    | 20.84   |
| PF3D7_0932000   | conserved Plasmodium protein, unknown function                           | 1.65  | 67.56   | 239.56  |
| PF3D7_0932100   | protein MAM3, putative                                                   | 1.40  | 34.50   | 102.65  |
| PF3D7_0932200   | profilin, putative (PFN)                                                 | 2.37  | 138.78  | 812.10  |
| PF3D7_0932300   | M18 aspartyl aminopeptidase (M18AAP)                                     | -0.95 | 60.53   | 35.32   |
| PF3D7_0932400   | peptide release factor, putative                                         | 0.80  | 9.94    | 19.52   |
| PF3D7_0932500   | palmitoyltransferase, putative (DHHC6)                                   | 0.69  | 5.08    | 9.30    |
| PF3D7_0932600   | apicoplast ribosomal protein S6, putative (RPS6)                         | 0.35  | 4.61    | 6.65    |
| PF3D7_0932700   | conserved Plasmodium protein, unknown function                           | -0.47 | 2.52    | 2.06    |
| PF3D7_0932800   | conserved Plasmodium protein, unknown function                           | -0.92 | 51.30   | 30.56   |
| PF3D7_0932900   | conserved Plasmodium protein, unknown function                           | -1.84 | 6.43    | 2.00    |
| PF3D7_0933000   | mRNA processing protein, putative                                        | -0.48 | 76.15   | 61.50   |
| PF3D7_0933100   | conserved Plasmodium protein, unknown function                           | 0.48  | 6.82    | 10.72   |
| PF3D7_0933200   | calyculin binding protein, putative                                      | 0.80  | 9.51    | 18.71   |
| PF3D7_0933300   | conserved Plasmodium protein, unknown function                           | 0.32  | 5.16    | 7.26    |
| PF3D7_0933400   | conserved Plasmodium protein, unknown function                           | 0.21  | 2.86    | 3.74    |
| PF3D7_0933500   | gamma-tubulin complex component, putative                                | -0.08 | 10.58   | 11.28   |
| PF3D7_0933600   | mitochondrial-processing peptidase subunit beta, putative (MAS1)         | -0.09 | 62.44   | 66.43   |
| PF3D7_0933700   | conserved Plasmodium protein, unknown function                           | 0.49  | 11.46   | 18.16   |
| PF3D7_0933800   | delta tubulin, putative                                                  | 0.47  | 0.75    | 1.18    |
| PF3D7_0933900   | conserved Plasmodium protein, unknown function                           | -0.41 | 48.82   | 41.59   |
| PF3D7_0934000   | histidine-tRNA ligase, putative                                          | -0.30 | 8.11    | 7.45    |
| PF3D7_0934100   | TFIIH basal transcription factor complex helicase XPD subunit (XPD)      | -1.23 | 49.82   | 23.93   |
| PF3D7_0934200   | conserved Plasmodium protein, unknown function                           | -0.07 | 9.05    | 9.75    |
| PF3D7_0934300   | conserved Plasmodium protein, unknown function                           | 0.49  | 9.26    | 14.73   |
| PF3D7_0934400   | transcription factor with AP2 domain(s), putative (ApiAP2)               | 1.20  | 28.71   | 74.66   |
| PF3D7_0934500   | V-type proton ATPase subunit E, putative                                 | -0.78 | 248.14  | 163.00  |
| PF3D7_0934600   | conserved Plasmodium protein, unknown function                           | 1.26  | 11.14   | 30.15   |
| PF3D7_0934700   | UBX domain, putative                                                     | 0.12  | 94.06   | 115.48  |
| PF3D7_0934800   | cAMP-dependent protein kinase catalytic subunit (PKAc)                   | 0.92  | 115.98  | 247.86  |
| PF3D7_0934900   | conserved Plasmodium protein, unknown function                           | -1.04 | 16.37   | 9.00    |
| PF3D7_0935000   | U2 small nuclear ribonucleoprotein B', putative                          | -1.32 | 159.72  | 72.44   |
| PF3D7_0935100   | conserved protein, unknown function                                      | -0.20 | 54.93   | 54.02   |
| PF3D7_0935200   | vacuolar protein sorting-associated protein 33, putative (VPS33)         | -0.31 | 55.41   | 50.61   |
| PF3D7_0935300   | phosphatidylinositol N-acetylglucosaminyltransferase subunit P, putative | -1.17 | 16.95   | 8.47    |
| PF3D7_0935400   | gametocyte development protein 1 (GDV1)                                  | 0.68  | 11.75   | 21.23   |
| PF3D7_0935500   | Plasmodium exported protein, unknown function (GEXP22)                   | -0.24 | 48.69   | 46.47   |
| PF3D7_0935600   | gametocytogenesis-implicated protein (GIG)                               | -0.96 | 1062.36 | 618.46  |
| PF3D7_0935700   | Plasmodium exported protein, unknown function                            | -0.22 | 144.66  | 140.52  |
| PF3D7_0935800   | cytoadherence linked asexual protein 9 (CLAG9)                           | 0.18  | 102.91  | 131.77  |
| PF3D7_0935900   | ring-exported protein 1 (REX1)                                           | -1.30 | 5832.63 | 2667.08 |
| PF3D7_0936000   | ring-exported protein 2 (REX2)                                           | -1.72 | 1919.61 | 656.31  |
| PF3D7_0936100   | early transcribed membrane protein (ETRAMP9)                             | -1.23 | 119.84  | 57.57   |
| PF3D7_0936200   | Plasmodium exported protein (hyp11), unknown function                    | 0.36  | 25.03   | 36.32   |
| PF3D7_0936300   | ring-exported protein 3 (REX3)                                           | -1.62 | 2782.78 | 1023.71 |
| PF3D7_0936400   | ring-exported protein 4 (REX4)                                           | -1.82 | 142.80  | 45.57   |
| PF3D7_0936500   | virulence-associated protein 1 (VAP1)                                    | -1.29 | 5.69    | 2.62    |
| PF3D7_0936600   | Plasmodium exported protein (PHISTc), unknown function (GEXP05)          | -2.11 | 530.25  | 139.07  |
| PF3D7_0936700   | lysophospholipase, putative                                              | -2.53 | 36.19   | 7.05    |
| PF3D7_0936800   | Plasmodium exported protein (PHISTc), unknown function                   | -1.88 | 4466.26 | 1373.39 |
| PF3D7_0936900   | Plasmodium exported protein (PHISTb), unknown function, pseudogene       | 1.05  | 0.70    | 1.66    |
| PF3D7_0937000   | Plasmodium exported protein (PHISTb), unknown function                   | -1.96 | 0.04    | 0.00    |
| PF3D7_0937100   | Plasmodium exported protein, unknown function                            | 1.21  | 0.00    | 0.05    |
| PF3D7_0937200   | lysophospholipase, putative                                              | -0.69 | 1.90    | 1.32    |
| PF3D7_0937300   | rifin (RIF)                                                              | -1.72 | 1.30    | 0.44    |
| PF3D7_0937400   | rifin (RIF)                                                              | -0.15 | 0.58    | 0.60    |
| PF3D7_0937500   | rifin (RIF)                                                              | 0.72  | 1.51    | 2.83    |
| PF3D7_0937600   | erythrocyte membrane protein 1, PfEMP1 (VAR)                             | -0.26 | 3.01    | 2.84    |
| PF3D7_0937700   | rifin (RIF)                                                              | 1.16  | 4.18    | 10.59   |
| PF3D7_0937800   | erythrocyte membrane protein 1, PfEMP1 (VAR)                             | 0.92  | 10.69   | 22.93   |
| PF3D7_1000100   | erythrocyte membrane protein 1, PfEMP1 (VAR)                             | 1.97  | 4.59    | 20.34   |
| PF3D7_1000200   | rifin (RIF)                                                              | 0.56  | 4.05    | 6.76    |
| PF3D7_1000300   | rifin (RIF)                                                              | -1.42 | 1.53    | 0.64    |
| PF3D7_1000400   | rifin (RIF)                                                              | 0.57  | 0.28    | 0.49    |
| PF3D7_1000500   | rifin (RIF)                                                              | 1.12  | 0.65    | 1.62    |

|                 |                                                                        |       |         |         |
|-----------------|------------------------------------------------------------------------|-------|---------|---------|
| PF3D7_1000600   | rifin (RIF)                                                            | 1.89  | 2.56    | 10.77   |
| PF3D7_1000700   | Plasmodium exported protein (PHISTa), unknown function, pseudogene     | -4.63 | 7.88    | 0.34    |
| PF3D7_1000800   | stevor, pseudogene                                                     | -3.40 | 3.08    | 0.31    |
| PF3D7_1000900   | erythrocyte membrane protein 1 (PEMP1), truncated                      | 0.36  | 0.03    | 0.06    |
| PF3D7_1001000   | Plasmodium exported protein (hyp12), unknown function (Pj13)           | 0.11  | 19.99   | 24.31   |
| PF3D7_1001100.1 | acyl-CoA binding protein, isoform 1, ACBP1 (ACBP1)                     | -0.78 | 194.65  | 127.62  |
| PF3D7_1001100.2 | acyl-CoA binding protein, isoform 1, ACBP1 (ACBP1)                     | -0.81 | 213.27  | 136.99  |
| PF3D7_1001200   | acyl-CoA binding protein, isoform 2, ACBP2 (ACBP2)                     | 0.55  | 38.15   | 63.04   |
| PF3D7_1001300   | Plasmodium exported protein (PHISTa), unknown function                 | 0.03  | 4.31    | 4.98    |
| PF3D7_1001400   | alpha/beta hydrolase, putative                                         | -1.94 | 395.78  | 116.40  |
| PF3D7_1001500   | early transcribed membrane protein 10.1 (ETRAMP10)                     | -1.65 | 8529.84 | 3059.74 |
| PF3D7_1001600   | alpha/beta hydrolase, putative                                         | -0.47 | 133.39  | 108.80  |
| PF3D7_1001700   | Plasmodium exported protein (PHISTc), unknown function                 | -1.41 | 581.22  | 246.27  |
| PF3D7_1001800   | Plasmodium exported protein (PHISTc), unknown function                 | -1.00 | 175.62  | 99.39   |
| PF3D7_1001900   | Plasmodium exported protein (hyp16), unknown function (Pj13)           | -1.81 | 381.12  | 122.52  |
| PF3D7_1002000   | Plasmodium exported protein (hyp2), unknown function                   | -1.08 | 83.43   | 44.69   |
| PF3D7_1002100   | EMP1-trafficking protein (PTP5)                                        | -0.66 | 1805.46 | 1288.91 |
| PF3D7_1002200   | tryptophan-rich antigen 3 (PArT)                                       | 1.08  | 26.24   | 62.87   |
| PF3D7_1002300   | conserved Plasmodium protein, unknown function                         | -0.02 | 2.43    | 2.70    |
| PF3D7_1002400.1 | RNA-binding protein, putative                                          | -0.71 | 632.86  | 438.23  |
| PF3D7_1002400.2 | RNA-binding protein, putative                                          | -0.71 | 636.65  | 440.36  |
| PF3D7_1002500   | conserved Plasmodium protein, unknown function                         | -1.20 | 120.30  | 59.23   |
| PF3D7_1002600   | conserved Plasmodium protein, unknown function                         | 0.64  | 2.61    | 4.62    |
| PF3D7_1002700   | conserved Plasmodium protein, unknown function                         | -0.57 | 22.57   | 17.17   |
| PF3D7_1002800   | DnaJ protein, putative                                                 | 0.85  | 1.84    | 3.74    |
| PF3D7_1002900   | conserved Plasmodium protein, unknown function                         | -0.67 | 69.07   | 49.18   |
| PF3D7_1003000   | conserved Plasmodium protein, unknown function                         | 0.42  | 9.06    | 13.71   |
| PF3D7_1003100   | conserved Plasmodium protein, unknown function                         | 0.74  | 8.96    | 16.96   |
| PF3D7_1003200   | conserved Plasmodium protein, unknown function                         | 1.20  | 4.29    | 11.17   |
| PF3D7_1003300   | N-acetyltransferase, putative                                          | 0.18  | 73.69   | 94.48   |
| PF3D7_1003400   | conserved Plasmodium protein, unknown function                         | 1.70  | 10.06   | 37.06   |
| PF3D7_1003500   | 40S ribosomal protein S20e, putative                                   | -0.99 | 814.61  | 463.78  |
| PF3D7_1003600   | inner membrane complex protein 1c, putative (IMC1c)                    | 3.24  | 160.69  | 1718.68 |
| PF3D7_1003700   | conserved Plasmodium protein, unknown function                         | 0.20  | 7.80    | 10.14   |
| PF3D7_1003800   | U5 small nuclear ribonucleolar protein, putative                       | -1.09 | 90.72   | 48.13   |
| PF3D7_1003900   | conserved Plasmodium protein, unknown function                         | -0.58 | 1.99    | 1.50    |
| PF3D7_1004000   | 60S ribosomal protein L13, putative                                    | -0.83 | 1269.79 | 809.03  |
| PF3D7_1004100   | hypothetical protein                                                   | -1.26 | 3.95    | 1.87    |
| PF3D7_1004200   | WD repeat-containing protein, putative                                 | 0.29  | 16.71   | 23.11   |
| PF3D7_1004300   | E3 ubiquitin-protein ligase, putative                                  | -0.84 | 222.06  | 140.08  |
| PF3D7_1004400   | RNA-binding protein, putative                                          | 0.27  | 57.06   | 77.56   |
| PF3D7_1004500   | conserved Plasmodium protein, unknown function                         | -0.17 | 21.92   | 21.99   |
| PF3D7_1004600   | conserved Plasmodium membrane protein, unknown function                | 0.69  | 8.21    | 14.92   |
| PF3D7_1004700   | conserved Plasmodium protein, unknown function                         | 0.23  | 5.96    | 7.93    |
| PF3D7_1004800   | ADP/ATP carrier protein, putative                                      | 0.09  | 12.17   | 14.69   |
| PF3D7_1004900   | conserved Plasmodium protein, unknown function                         | 1.04  | 11.76   | 27.43   |
| PF3D7_1005000   | methionine--tRNA ligase, putative (MRSapi)                             | -0.07 | 10.65   | 11.49   |
| PF3D7_1005100   | conserved protein, unknown function                                    | -0.99 | 27.46   | 15.64   |
| PF3D7_1005200   | conserved Plasmodium protein, unknown function                         | 1.08  | 0.36    | 1.05    |
| PF3D7_1005300   | conserved Plasmodium protein, unknown function                         | 0.04  | 0.37    | 0.43    |
| PF3D7_1005400   | conserved Plasmodium protein, unknown function                         | -0.68 | 0.56    | 0.39    |
| PF3D7_1005500   | regulator of nonsense transcripts, putative                            | 0.23  | 44.96   | 59.46   |
| PF3D7_1005600   | DnaJ protein, putative                                                 | -1.21 | 65.07   | 31.73   |
| PF3D7_1005700   | DnaJ protein, putative                                                 | 0.63  | 3.46    | 6.03    |
| PF3D7_1005800   | conserved Plasmodium membrane protein, unknown function                | 0.69  | 5.66    | 10.33   |
| PF3D7_1005900   | conserved Plasmodium protein, unknown function                         | 0.70  | 12.96   | 23.85   |
| PF3D7_1006000   | conserved Plasmodium protein, unknown function                         | 1.97  | 2.15    | 9.57    |
| PF3D7_1006100   | CCR4-NOT transcription complex subunit 5, putative (NOT5)              | 0.46  | 7.63    | 11.87   |
| PF3D7_1006200   | DNA/RNA-binding protein Alba 3 (ALBA3)                                 | -0.66 | 581.29  | 414.29  |
| PF3D7_1006300   | conserved Plasmodium protein, unknown function                         | 1.38  | 0.36    | 1.17    |
| PF3D7_1006400   | conserved Plasmodium protein, unknown function                         | -0.19 | 2.14    | 2.12    |
| PF3D7_1006500   | conserved Plasmodium protein, unknown function                         | 0.55  | 4.16    | 6.88    |
| PF3D7_1006600   | phosducin-like protein, putative (PhLP1)                               | 0.27  | 29.10   | 39.55   |
| PF3D7_1006700   | conserved Plasmodium protein, unknown function                         | -1.22 | 92.75   | 44.89   |
| PF3D7_1006800   | RNA-binding protein, putative                                          | -1.06 | 1382.64 | 749.47  |
| PF3D7_1006900   | PPPDE peptidase, putative                                              | -0.57 | 40.15   | 30.48   |
| PF3D7_1007000   | conserved membrane protein, unknown function                           | 0.09  | 32.36   | 38.88   |
| PF3D7_1007100   | conserved Plasmodium protein, unknown function                         | 0.69  | 3.25    | 6.00    |
| PF3D7_1007200   | rhoGAP GTPase, putative                                                | 1.15  | 31.42   | 78.57   |
| PF3D7_1007300   | RING zinc finger protein, putative                                     | 2.13  | 8.01    | 39.72   |
| PF3D7_1007400   | conserved Plasmodium protein, unknown function                         | -0.29 | 26.57   | 24.63   |
| PF3D7_1007500   | conserved Plasmodium protein, unknown function                         | -1.10 | 36.37   | 19.13   |
| PF3D7_1007600   | conserved Plasmodium protein, unknown function                         | -0.58 | 132.57  | 99.99   |
| PF3D7_1007700   | transcription factor with AP2 domain(s) (ApiAP2)                       | 0.95  | 56.21   | 122.59  |
| PF3D7_1007800   | conserved Plasmodium protein, unknown function                         | -0.73 | 5.49    | 3.73    |
| PF3D7_1007900   | eukaryotic translation initiation factor 3 subunit D, putative (EIF3D) | -1.16 | 235.99  | 119.51  |
| PF3D7_1008000   | histone deacetylase 2 (HDA2)                                           | -0.71 | 70.99   | 48.87   |
| PF3D7_1008100   | conserved Plasmodium protein, unknown function                         | -0.45 | 86.29   | 71.53   |
| PF3D7_1008200   | endonuclease, putative                                                 | -0.59 | 5.07    | 3.81    |
| PF3D7_1008300   | conserved Plasmodium protein, unknown function, pseudogene             | -1.96 | 0.41    | 0.00    |
| PF3D7_1008400   | 26S protease regulatory subunit 4, putative (RPT2)                     | 0.26  | 240.83  | 326.20  |
| PF3D7_1008500   | conserved Plasmodium membrane protein, unknown function                | -0.68 | 49.53   | 34.84   |
| PF3D7_1008600   | zinc finger C-x8-C-x5-C-x3-H type, putative                            | 0.98  | 1.72    | 3.87    |
| PF3D7_1008700   | tubulin beta chain                                                     | 0.81  | 210.72  | 418.61  |
| PF3D7_1008800   | nucleolar protein 5, putative (NOP5)                                   | -0.46 | 461.29  | 377.75  |
| PF3D7_1008900   | adenylate kinase (AK1)                                                 | -0.62 | 227.78  | 167.39  |
| PF3D7_1009000   | diphthine synthase, putative                                           | -2.16 | 98.97   | 25.02   |
| PF3D7_1009100   | conserved Plasmodium membrane protein, unknown function                | -2.13 | 0.91    | 0.23    |
| PF3D7_1009200   | small subunit rRNA synthesis-associated protein, putative              | -1.30 | 28.02   | 12.82   |
| PF3D7_1009300   | conserved Plasmodium protein, unknown function                         | -1.21 | 13.16   | 6.43    |
| PF3D7_1009400   | zinc finger protein, putative                                          | -1.25 | 43.63   | 20.76   |
| PF3D7_1009500   | metallopeptidase, putative                                             | 0.47  | 10.17   | 15.97   |
| PF3D7_1009600   | protein phosphatase, putative                                          | 0.13  | 5.37    | 6.63    |
| PF3D7_1009700   | tubulin--tyrosine ligase, putative                                     | 1.20  | 33.96   | 88.38   |
| PF3D7_1009800   | conserved Plasmodium membrane protein, unknown function                | -1.64 | 25.38   | 9.19    |
| PF3D7_1009900   | conserved Plasmodium protein, unknown function                         | -1.27 | 13.00   | 6.10    |
| PF3D7_1010000   | ribosomal protein L43, mitochondrial, putative                         | -0.50 | 25.61   | 20.49   |
| PF3D7_1010100   | conserved Plasmodium protein, unknown function                         | -1.52 | 70.57   | 27.70   |

|                 |                                                                   |       |         |         |
|-----------------|-------------------------------------------------------------------|-------|---------|---------|
| PF3D7_1010200   | DNA2/NAM7 helicase, putative                                      | -1.10 | 77.98   | 41.03   |
| PF3D7_1010300   | succinate dehydrogenase subunit 4, putative (SDH4)                | 0.13  | 737.31  | 908.19  |
| PF3D7_1010400   | conserved Plasmodium protein, unknown function                    | -0.01 | 15.51   | 17.41   |
| PF3D7_1010500   | ankyrin-repeat protein, putative                                  | 1.02  | 1.89    | 4.39    |
| PF3D7_1010600   | eukaryotic translation initiation factor 2 beta subunit, putative | -1.27 | 678.12  | 316.94  |
| PF3D7_1010700   | dolichyl-phosphate-mannose protein mannosyltransferase, putative  | -0.85 | 160.33  | 100.47  |
| PF3D7_1010800   | 50S ribosomal protein L22, mitochondrial, putative                | 0.64  | 5.00    | 8.84    |
| PF3D7_1010900   | conserved Plasmodium protein, unknown function                    | -0.22 | 15.49   | 14.98   |
| PF3D7_1011000   | inner membrane complex sub-compartment protein 1 (ISP1)           | 0.82  | 10.97   | 21.87   |
| PF3D7_1011100   | conserved Plasmodium protein, unknown function                    | -1.28 | 10.05   | 4.69    |
| PF3D7_1011200.1 | conserved Plasmodium protein, unknown function                    | -1.01 | 26.68   | 14.97   |
| PF3D7_1011200.2 | conserved Plasmodium protein, unknown function                    | -0.98 | 25.71   | 14.69   |
| PF3D7_1011300   | conserved Plasmodium membrane protein, unknown function           | -1.10 | 2.82    | 1.48    |
| PF3D7_1011400   | proteasome subunit beta type-5                                    | -0.66 | 102.97  | 73.38   |
| PF3D7_1011500   | conserved Plasmodium membrane protein, unknown function           | 1.89  | 26.35   | 110.34  |
| PF3D7_1011600   | conserved Plasmodium protein, unknown function                    | -1.50 | 6.43    | 2.56    |
| PF3D7_1011700   | DNA repair protein RAD23, putative                                | -0.99 | 97.75   | 55.76   |
| PF3D7_1011800   | PRE-binding protein (PREBP)                                       | -0.35 | 664.31  | 588.77  |
| PF3D7_1011900   | heme oxygenase (HO)                                               | 0.06  | 25.45   | 29.87   |
| PF3D7_1012000   | E3 ubiquitin-protein ligase, putative                             | -0.02 | 24.72   | 27.57   |
| PF3D7_1012100   | conserved Plasmodium protein, unknown function                    | 1.10  | 13.82   | 33.57   |
| PF3D7_1012200   | conserved Plasmodium protein, unknown function                    | 1.40  | 59.76   | 177.57  |
| PF3D7_1012300   | ubiquinol-cytochrome c reductase complex subunit, putative        | 1.45  | 16.52   | 51.17   |
| PF3D7_1012400   | hypoxanthine-guanine phosphoribosyltransferase (HGPRT)            | -0.02 | 727.89  | 810.36  |
| PF3D7_1012500   | phosphoglucomutase, putative                                      | -0.67 | 36.53   | 26.01   |
| PF3D7_1012600   | GMP synthetase (GMPs)                                             | -1.63 | 210.50  | 76.61   |
| PF3D7_1012700   | NLI interacting factor-like phosphatase, putative (NIF4)          | -1.24 | 33.18   | 15.91   |
| PF3D7_1012800   | conserved Plasmodium protein, unknown function                    | 0.23  | 2.05    | 2.72    |
| PF3D7_1012900   | autophagy-related protein 18, putative (ATG18)                    | -0.54 | 173.18  | 134.76  |
| PF3D7_1013000   | zinc finger protein, putative                                     | -0.23 | 15.08   | 14.55   |
| PF3D7_1013100   | U3 small nucleolar RNA-associated protein 13, putative (UTP13)    | -1.52 | 65.11   | 25.64   |
| PF3D7_1013200   | conserved Plasmodium protein, unknown function                    | 0.86  | 23.30   | 47.88   |
| PF3D7_1013300   | conserved Plasmodium protein, unknown function                    | -2.37 | 19.17   | 4.19    |
| PF3D7_1013400   | conserved Plasmodium protein, unknown function                    | 1.69  | 4.00    | 14.63   |
| PF3D7_1013500   | phosphoinositide-specific phospholipase C (PI-PLC)                | -0.29 | 21.31   | 19.67   |
| PF3D7_1013600   | conserved Plasmodium protein, unknown function                    | 0.27  | 8.90    | 12.12   |
| PF3D7_1013700   | conserved Plasmodium protein, unknown function                    | -0.16 | 4.67    | 4.74    |
| PF3D7_1013800   | conserved Plasmodium protein, unknown function                    | 1.33  | 39.37   | 111.99  |
| PF3D7_1013900   | initiation factor 2 subunit family, putative                      | -1.12 | 51.06   | 26.56   |
| PF3D7_1014000   | GDP-L-fucose synthase (FS)                                        | 0.95  | 5.58    | 12.24   |
| PF3D7_1014100   | conserved Plasmodium protein, unknown function                    | 2.48  | 20.49   | 129.20  |
| PF3D7_1014200   | male gamete fusion factor HAP2, putative (HAP2)                   | 1.17  | 0.33    | 0.85    |
| PF3D7_1014300   | conserved protein, unknown function                               | 0.88  | 13.68   | 28.42   |
| PF3D7_1014400   | MO15-related protein kinase (MRK)                                 | -1.83 | 65.18   | 20.69   |
| PF3D7_1014500   | conserved Plasmodium protein, unknown function                    | -1.63 | 6.63    | 2.42    |
| PF3D7_1014600   | transcriptional coactivator ADA2 (ADA2)                           | -0.04 | 194.67  | 214.26  |
| PF3D7_1014700   | prohibitin, putative                                              | 0.83  | 10.01   | 20.17   |
| PF3D7_1014800   | conserved Plasmodium protein, unknown function                    | 0.58  | 0.70    | 1.18    |
| PF3D7_1014900   | conserved Plasmodium protein, unknown function                    | 0.88  | 35.06   | 72.78   |
| PF3D7_1015000   | FAD synthetase, putative                                          | 0.78  | 8.42    | 16.41   |
| PF3D7_1015100   | conserved protein, unknown function                               | -0.82 | 37.93   | 24.33   |
| PF3D7_1015200.1 | cysteine-tRNA ligase, putative (CysRS)                            | -1.52 | 84.78   | 33.32   |
| PF3D7_1015200.2 | cysteine-tRNA ligase, putative (CysRS)                            | -1.52 | 84.90   | 33.35   |
| PF3D7_1015200.3 | cysteine-tRNA ligase, putative                                    | -1.51 | 95.86   | 37.88   |
| PF3D7_1015300   | methionine aminopeptidase 1b, putative (METAP1b)                  | -1.35 | 90.56   | 40.23   |
| PF3D7_1015400   | conserved Plasmodium protein, unknown function                    | 0.04  | 12.20   | 14.18   |
| PF3D7_1015500   | conserved Plasmodium protein, unknown function                    | 0.30  | 3.05    | 4.25    |
| PF3D7_1015600   | heat shock protein 60 (HSP60)                                     | 1.09  | 30.66   | 73.65   |
| PF3D7_1015700.1 | tubulin binding cofactor c, putative                              | 0.71  | 4.42    | 8.22    |
| PF3D7_1015700.2 | tubulin binding cofactor c, putative                              | 0.83  | 3.98    | 8.06    |
| PF3D7_1015800   | ribonucleotide reductase small subunit, putative                  | 0.87  | 37.73   | 77.71   |
| PF3D7_1015900   | enolase (ENO)                                                     | -1.06 | 1960.80 | 1058.66 |
| PF3D7_1016000   | conserved Plasmodium protein, unknown function                    | 2.37  | 9.69    | 56.58   |
| PF3D7_1016100   | conserved Plasmodium protein, unknown function                    | -0.86 | 2.52    | 1.56    |
| PF3D7_1016200   | conserved Plasmodium protein, unknown function                    | -1.09 | 46.38   | 24.60   |
| PF3D7_1016300   | glycophorin binding protein (GBP)                                 | -1.23 | 3120.34 | 1499.15 |
| PF3D7_1016400   | serine/threonine protein kinase, FIKK family (FIKK10.1)           | -1.15 | 204.52  | 104.00  |
| PF3D7_1016500   | Plasmodium exported protein (PHISTc), unknown function            | -0.18 | 4.94    | 4.94    |
| PF3D7_1016600   | Plasmodium exported protein (PHISTc), unknown function            | -2.12 | 45.00   | 11.68   |
| PF3D7_1016700   | Plasmodium exported protein (PHISTc), unknown function            | -0.82 | 95.92   | 61.54   |
| PF3D7_1016800   | Plasmodium exported protein (PHISTc), unknown function            | 0.46  | 257.13  | 398.47  |
| PF3D7_1016900   | early transcribed membrane protein 10.3 (ETRAMP10.3)              | 2.29  | 116.04  | 640.68  |
| PF3D7_1017000   | DNA polymerase delta catalytic subunit                            | 0.94  | 11.50   | 24.94   |
| PF3D7_1017100   | rhostry neck protein 12 (RON12)                                   | 0.36  | 65.42   | 94.80   |
| PF3D7_1017200   | enoyl-CoA hydratase-related protein, putative                     | 0.41  | 3.99    | 5.98    |
| PF3D7_1017300.1 | golgi re-assembly stacking protein 1 (GRASP)                      | 0.93  | 22.11   | 47.48   |
| PF3D7_1017300.2 | golgi re-assembly stacking protein 2 (GRASP)                      | 0.94  | 22.43   | 48.57   |
| PF3D7_1017400   | phosphomannomutase, putative (PMM)                                | -0.73 | 193.80  | 132.00  |
| PF3D7_1017500   | conserved Plasmodium protein, unknown function                    | 3.40  | 39.05   | 465.65  |
| PF3D7_1017600   | conserved Plasmodium protein, unknown function                    | -0.78 | 159.39  | 104.54  |
| PF3D7_1017700   | conserved Plasmodium protein, unknown function                    | 0.30  | 7.79    | 10.84   |
| PF3D7_1017800   | conserved Plasmodium protein, unknown function                    | -1.03 | 11.55   | 6.39    |
| PF3D7_1017900   | 26S proteasome regulatory subunit p55, putative (RPN5)            | -0.96 | 112.35  | 65.09   |
| PF3D7_1018000   | tRNA pseudouridine synthase, putative                             | -0.67 | 10.93   | 7.75    |
| PF3D7_1018100   | conserved Plasmodium protein, unknown function                    | -0.35 | 1.35    | 1.19    |
| PF3D7_1018200   | serine/threonine protein phosphatase 8, putative (PPP8)           | 0.68  | 32.99   | 59.55   |
| PF3D7_1018300   | conserved Plasmodium protein, unknown function                    | -0.16 | 134.96  | 136.00  |
| PF3D7_1018400   | conserved Plasmodium protein, unknown function                    | -0.83 | 11.42   | 7.24    |
| PF3D7_1018500   | PHF5-like protein, putative                                       | -0.52 | 62.87   | 49.48   |
| PF3D7_1018600   | conserved Plasmodium protein, unknown function                    | -0.78 | 61.73   | 40.55   |
| PF3D7_1018700   | conserved Plasmodium protein, unknown function                    | -1.80 | 167.03  | 54.21   |
| PF3D7_1018800   | conserved protein, unknown function                               | -0.12 | 5.37    | 5.60    |
| PF3D7_1018900   | conserved Plasmodium protein, unknown function                    | -0.42 | 5.08    | 4.29    |
| PF3D7_1019000   | eukaryotic translation initiation factor subunit eIF2A, putative  | -0.87 | 195.94  | 121.33  |
| PF3D7_1019100   | conserved Plasmodium protein, unknown function                    | 0.44  | 8.31    | 12.69   |
| PF3D7_1019200   | conserved Plasmodium protein, unknown function                    | -0.28 | 1.26    | 1.18    |
| PF3D7_1019300   | zinc finger protein, putative                                     | 0.12  | 10.74   | 13.14   |
| PF3D7_1019400   | 60S ribosomal protein L30c, putative                              | -0.87 | 751.79  | 464.19  |

|                 |                                                                                 |       |         |         |
|-----------------|---------------------------------------------------------------------------------|-------|---------|---------|
| PF3D7_1019500.1 | conserved Plasmodium membrane protein, unknown function                         | 0.51  | 15.07   | 24.22   |
| PF3D7_1019500.2 | conserved Plasmodium membrane protein, unknown function                         | 0.51  | 15.07   | 24.23   |
| PF3D7_1019600   | conserved Plasmodium protein, unknown function                                  | 0.40  | 12.86   | 19.18   |
| PF3D7_1019700   | conserved Plasmodium protein, unknown function                                  | 0.68  | 16.33   | 29.57   |
| PF3D7_1019800   | tRNA methyltransferase, putative                                                | 0.61  | 6.73    | 11.63   |
| PF3D7_1019900   | autophagy-related protein 8 (ATG8)                                              | 0.82  | 28.79   | 57.48   |
| PF3D7_1020000   | large subunit rRNA processing RRM protein, putative                             | 0.02  | 75.01   | 86.09   |
| PF3D7_1020100   | flagellar outer arm dynein-associated protein, putative                         | 3.45  | 2.42    | 30.64   |
| PF3D7_1020200   | conserved Plasmodium protein, unknown function                                  | 1.71  | 2.32    | 8.59    |
| PF3D7_1020300   | cytoplasmic dynein intermediate chain, putative                                 | 1.27  | 4.13    | 11.31   |
| PF3D7_1020400   | S-adenosyl-L-methionine-dependent methyltransferase, putative                   | -1.58 | 31.55   | 11.89   |
| PF3D7_1020500   | conserved Plasmodium protein, unknown function                                  | -0.70 | 12.21   | 8.48    |
| PF3D7_1020600   | conserved Plasmodium membrane protein, unknown function                         | -0.77 | 4.24    | 2.81    |
| PF3D7_1020700   | histone acetyltransferase, putative                                             | -1.54 | 69.80   | 27.05   |
| PF3D7_1020800   | dihydrolipoamide acyltransferase component E2 (DLAT)                            | 0.22  | 12.09   | 15.88   |
| PF3D7_1020900   | ADP-ribosylation factor (ARF1)                                                  | -0.28 | 221.95  | 206.76  |
| PF3D7_1021000   | conserved Plasmodium protein, unknown function                                  | 1.24  | 13.33   | 35.51   |
| PF3D7_1021100   | conserved Plasmodium protein, unknown function                                  | -1.48 | 16.81   | 6.81    |
| PF3D7_1021200   | conserved Plasmodium protein, unknown function                                  | 0.98  | 12.30   | 27.35   |
| PF3D7_1021300   | conserved Plasmodium membrane protein, unknown function                         | -0.81 | 11.29   | 7.25    |
| PF3D7_1021400   | endomembrane protein 70, putative                                               | -1.06 | 79.55   | 43.05   |
| PF3D7_1021500   | RNA helicase, putative                                                          | -1.02 | 36.16   | 20.09   |
| PF3D7_1021600   | deoxyribose-phosphate aldolase, putative                                        | 0.00  | 67.51   | 76.24   |
| PF3D7_1021700   | conserved Plasmodium membrane protein, unknown function                         | 2.38  | 9.75    | 57.46   |
| PF3D7_1021800   | schizont egress antigen-1 (SEA1)                                                | 0.96  | 75.82   | 166.26  |
| PF3D7_1021900   | conserved Plasmodium protein (10b antigen), unknown function                    | 0.61  | 55.24   | 95.34   |
| PF3D7_1022000   | RNA-binding protein, putative                                                   | -1.27 | 44.17   | 20.70   |
| PF3D7_1022100   | conserved Plasmodium protein, unknown function                                  | -1.82 | 96.23   | 30.71   |
| PF3D7_1022200   | conserved Plasmodium membrane protein, unknown function                         | -0.40 | 10.54   | 8.99    |
| PF3D7_1022300   | ZIP domain-containing protein, putative (ZIPCO)                                 | 0.74  | 3.00    | 5.70    |
| PF3D7_1022400   | serine/arginine-rich splicing factor 4 (SRSF4)                                  | -0.42 | 334.60  | 283.09  |
| PF3D7_1022500   | citrate synthase, mitochondrial precursor, putative (CS)                        | 1.83  | 21.57   | 86.87   |
| PF3D7_1022600   | kelch protein, putative                                                         | -1.48 | 139.20  | 56.53   |
| PF3D7_1022700   | phospholipid scramblase, putative                                               | 0.70  | 59.89   | 110.14  |
| PF3D7_1022800   | 4-hydroxy-3-methylbut-2-en-1-yl diphosphate synthase (GcpE)                     | 0.69  | 12.61   | 22.96   |
| PF3D7_1022900   | CDGSH iron-sulfur domain-containing protein, putative                           | 1.65  | 5.58    | 19.93   |
| PF3D7_1023000   | conserved Plasmodium membrane protein, unknown function                         | 1.88  | 9.05    | 37.66   |
| PF3D7_1023100   | dynein heavy chain, putative                                                    | 1.35  | 0.26    | 0.75    |
| PF3D7_1023200   | orotidine 5'-phosphate decarboxylase (OMPDC)                                    | -1.69 | 60.93   | 21.38   |
| PF3D7_1023300   | conserved Plasmodium protein, unknown function                                  | 1.02  | 8.40    | 19.41   |
| PF3D7_1023400   | HORMA domain protein, putative                                                  | 0.34  | 20.69   | 29.63   |
| PF3D7_1023500   | conserved Plasmodium protein, unknown function                                  | 0.20  | 5.79    | 7.56    |
| PF3D7_1023600   | conserved Plasmodium protein, unknown function                                  | 0.55  | 0.28    | 0.47    |
| PF3D7_1023700   | conserved Plasmodium protein, unknown function                                  | -0.21 | 0.31    | 0.30    |
| PF3D7_1023800   | conserved Plasmodium protein, unknown function                                  | 2.62  | 1.19    | 8.36    |
| PF3D7_1023900   | chromodomain-helicase-DNA-binding protein 1 homolog, putative (CHD1)            | 0.37  | 474.81  | 691.87  |
| PF3D7_1024000   | conserved Plasmodium protein, unknown function                                  | 2.13  | 10.42   | 51.39   |
| PF3D7_1024100   | conserved Plasmodium protein, unknown function                                  | 1.77  | 1.68    | 6.49    |
| PF3D7_1024200   | RNA-binding protein, putative                                                   | 1.74  | 3.34    | 12.71   |
| PF3D7_1024300   | conserved Plasmodium protein, unknown function                                  | 0.59  | 19.09   | 32.48   |
| PF3D7_1024400   | conserved Plasmodium protein, unknown function                                  | 0.76  | 3.71    | 7.12    |
| PF3D7_1024500   | conserved Plasmodium protein, unknown function                                  | 0.52  | 8.51    | 13.78   |
| PF3D7_1024600   | RAP protein, putative                                                           | 1.32  | 1.67    | 4.75    |
| PF3D7_1024700   | conserved Plasmodium protein, unknown function                                  | 0.69  | 6.88    | 12.59   |
| PF3D7_1024800   | conserved Plasmodium protein, unknown function                                  | -1.85 | 1478.14 | 463.42  |
| PF3D7_1024900   | conserved Plasmodium protein, unknown function                                  | 0.34  | 2.36    | 3.36    |
| PF3D7_1025000   | fornin 2, putative                                                              | 0.32  | 106.02  | 148.98  |
| PF3D7_1025100   | glutamine--fructose-6-phosphate aminotransferase [isomerizing], putative (GFPT) | 0.08  | 52.74   | 62.99   |
| PF3D7_1025200   | conserved Plasmodium protein, unknown function                                  | 0.36  | 5.71    | 8.27    |
| PF3D7_1025300   | conserved Plasmodium protein, unknown function                                  | -0.33 | 7.36    | 6.62    |
| PF3D7_1025400   | conserved Plasmodium membrane protein, unknown function                         | 0.56  | 20.72   | 34.41   |
| PF3D7_1025500   | conserved Plasmodium protein, unknown function                                  | 1.15  | 0.91    | 2.29    |
| PF3D7_1025600   | cytochrome c oxidase copper chaperone, putative (COX17)                         | 0.43  | 9.22    | 14.14   |
| PF3D7_1025700   | conserved Plasmodium protein, unknown function                                  | 1.03  | 15.37   | 35.49   |
| PF3D7_1025800   | conserved Plasmodium protein, unknown function                                  | 0.05  | 2.75    | 3.25    |
| PF3D7_1025900   | conserved Plasmodium protein, unknown function                                  | 0.81  | 36.15   | 71.44   |
| PF3D7_1026000   | conserved Plasmodium protein, unknown function                                  | -0.92 | 74.89   | 44.57   |
| PF3D7_1026100   | conserved Plasmodium protein, unknown function                                  | -0.95 | 3.83    | 2.23    |
| PF3D7_1026200   | conserved Plasmodium protein, unknown function                                  | 1.45  | 1.53    | 4.75    |
| PF3D7_1026300   | conserved Plasmodium protein, unknown function                                  | 1.41  | 2.77    | 8.34    |
| PF3D7_1026400   | cell division cycle protein 20 homolog, putative (CDC20)                        | 1.49  | 2.15    | 6.86    |
| PF3D7_1026500   | conserved Plasmodium protein, unknown function                                  | 3.12  | 3.79    | 38.16   |
| PF3D7_1026600   | conserved Plasmodium protein, unknown function                                  | 4.91  | 34.10   | 1159.21 |
| PF3D7_1026800   | 40S ribosomal protein S2 (RPS2)                                                 | -0.80 | 2441.53 | 1578.52 |
| PF3D7_1026900   | biotin--acetyl-CoA-carboxylase, putative                                        | 0.52  | 1.82    | 2.97    |
| PF3D7_1027000   | conserved Plasmodium protein, unknown function                                  | 0.61  | 1.85    | 3.18    |
| PF3D7_1027100   | U3 small nucleolar ribonucleoprotein protein MPP10, putative (MPP10)            | -0.61 | 92.74   | 68.41   |
| PF3D7_1027200   | mitochondrial ribosomal protein S22 precursor, putative                         | -0.91 | 36.73   | 22.07   |
| PF3D7_1027300   | peroxiredoxin (nPrx)                                                            | 1.16  | 630.73  | 1593.26 |
| PF3D7_1027400   | DNA-directed RNA polymerase II, putative                                        | -1.62 | 107.47  | 39.42   |
| PF3D7_1027500   | conserved Plasmodium protein, unknown function                                  | -0.62 | 6.55    | 4.81    |
| PF3D7_1027600   | topoisomerase, putative                                                         | 0.13  | 3.70    | 4.59    |
| PF3D7_1027700.1 | centrin-3 (CEN3)                                                                | 0.43  | 22.44   | 34.14   |
| PF3D7_1027700.2 | centrin-3 (CEN3)                                                                | 0.43  | 22.23   | 33.86   |
| PF3D7_1027800   | 60S ribosomal protein L3 (RPL3)                                                 | -0.72 | 1871.17 | 1279.08 |
| PF3D7_1027900   | palmitoyltransferase, putative (DHHC10)                                         | -1.07 | 6.42    | 3.45    |
| PF3D7_1028000   | methyltransferase, putative                                                     | -1.44 | 56.00   | 23.37   |
| PF3D7_1028100   | protoporphyrinogen oxidase (PPO)                                                | -0.70 | 1.55    | 1.08    |
| PF3D7_1028200   | zinc finger, C3HC4 type, putative                                               | 0.73  | 11.59   | 21.78   |
| PF3D7_1028300   | rRNA-processing protein EBP2, putative (EBP2)                                   | -0.63 | 84.35   | 61.60   |
| PF3D7_1028400   | nucleolar preribosomal assembly protein, putative                               | -1.31 | 103.25  | 46.97   |
| PF3D7_1028500   | conserved Plasmodium protein, unknown function                                  | -0.99 | 54.78   | 31.18   |
| PF3D7_1028600   | conserved Plasmodium protein, unknown function                                  | 1.06  | 19.88   | 46.84   |
| PF3D7_1028700   | merozoite TRAP-like protein (MTRAP)                                             | 4.01  | 39.01   | 708.85  |
| PF3D7_1028800   | conserved Plasmodium protein, unknown function                                  | 1.06  | 23.48   | 55.39   |
| PF3D7_1028900   | inner membrane complex protein 1m, putative (IMC1m)                             | 1.66  | 10.76   | 38.38   |
| PF3D7_1029000   | conserved Plasmodium protein, unknown function, pseudogene                      | 1.54  | 0.32    | 1.09    |
| PF3D7_1029100.1 | conserved Plasmodium protein, unknown function                                  | 1.46  | 1.07    | 3.33    |



|                 |                                                                                 |       |         |          |
|-----------------|---------------------------------------------------------------------------------|-------|---------|----------|
| PF3D7_1029100.2 | conserved Plasmodium protein, unknown function                                  | 1.46  | 1.07    | 3.34     |
| PF3D7_1029200   | WD repeat-containing protein, putative                                          | -2.46 | 34.59   | 7.12     |
| PF3D7_1029300   | conserved Plasmodium protein, unknown function                                  | 0.91  | 6.13    | 13.00    |
| PF3D7_1029400   | conserved Plasmodium protein, unknown function                                  | -0.75 | 44.41   | 29.79    |
| PF3D7_1029500   | conserved Plasmodium protein, unknown function                                  | -0.10 | 0.97    | 1.03     |
| PF3D7_1029600   | adenosine deaminase (ADA)                                                       | -0.33 | 402.69  | 361.35   |
| PF3D7_1029700   | conserved Plasmodium protein, unknown function                                  | 0.83  | 0.73    | 1.48     |
| PF3D7_1029800   | RAP protein, putative                                                           | 0.96  | 11.95   | 26.31    |
| PF3D7_1029900   | conserved Plasmodium protein, unknown function                                  | 0.03  | 40.69   | 46.83    |
| PF3D7_1030000   | transcription elongation factor SPT4, putative (SPT4)                           | -0.34 | 149.33  | 133.23   |
| PF3D7_1030100   | pre-mRNA-splicing factor ATP-dependent RNA helicase PRP22, putative (PRP22)     | -0.35 | 78.53   | 69.50    |
| PF3D7_1030200   | conserved Plasmodium protein, unknown function                                  | 2.38  | 32.96   | 193.85   |
| PF3D7_1030300   | conserved Plasmodium protein, unknown function                                  | 0.36  | 56.23   | 81.45    |
| PF3D7_1030400   | conserved Plasmodium protein, unknown function                                  | -0.72 | 9.88    | 6.78     |
| PF3D7_1030500   | 26S proteasome regulatory subunit RPN9, putative (RPN9)                         | -0.71 | 62.33   | 42.91    |
| PF3D7_1030600   | tRNA N6-adenosine threonylcarbamoyltransferase (KAE1)                           | -1.27 | 60.38   | 28.30    |
| PF3D7_1030700   | RNA methyltransferase, putative                                                 | -1.79 | 48.71   | 15.91    |
| PF3D7_1030800   | calmodulin, putative                                                            | 0.22  | 15.11   | 19.95    |
| PF3D7_1030900   | 28 kDa ookinete surface protein (P28)                                           | 0.65  | 15.04   | 26.64    |
| PF3D7_1031000   | 25 kDa ookinete surface antigen precursor (Pfs25)                               | 0.71  | 6.03    | 11.21    |
| PF3D7_1031100   | conserved Plasmodium protein, unknown function                                  | -0.62 | 11.42   | 8.39     |
| PF3D7_1031200   | MORN repeat-containing protein 1 (MORN1)                                        | 1.40  | 19.29   | 57.35    |
| PF3D7_1031300   | conserved Plasmodium protein, unknown function                                  | 0.87  | 8.19    | 16.86    |
| PF3D7_1031400.1 | OTU-like cysteine protease, putative                                            | 1.24  | 13.21   | 35.16    |
| PF3D7_1031400.2 | OTU-like cysteine protease, putative                                            | 1.24  | 13.12   | 34.96    |
| PF3D7_1031500   | DEAD/DEAH box helicase, putative                                                | -0.71 | 54.15   | 37.45    |
| PF3D7_1031600   | conserved Plasmodium protein, unknown function (GEXP15)                         | -0.23 | 54.59   | 52.41    |
| PF3D7_1031700   | protein phosphatase inhibitor 3 (I3)                                            | 0.78  | 34.97   | 67.91    |
| PF3D7_1031800   | conserved Plasmodium protein, unknown function                                  | 0.72  | 10.78   | 20.13    |
| PF3D7_1031900   | conserved Plasmodium protein, unknown function                                  | 0.74  | 1.50    | 2.85     |
| PF3D7_1032000   | ribosome maturation factor RimM, putative (RimM)                                | 0.27  | 8.75    | 11.92    |
| PF3D7_1032100   | mRNA-decapping enzyme subunit 1, putative (DCP1)                                | -1.24 | 150.79  | 71.88    |
| PF3D7_1032200   | conserved Plasmodium protein, unknown function                                  | -0.15 | 1.61    | 1.65     |
| PF3D7_1032300   | conserved Plasmodium protein, unknown function                                  | 0.65  | 2.15    | 3.81     |
| PF3D7_1032400   | phosphatidylinositol N-acetylglucosaminyltransferase subunit A, putative (PIGA) | 0.74  | 13.32   | 25.09    |
| PF3D7_1032500   | DER1-like protein, putative (Der1-2)                                            | -0.34 | 41.12   | 36.57    |
| PF3D7_1032600   | conserved protein, unknown function                                             | -0.73 | 3.34    | 2.28     |
| PF3D7_1032700   | conserved Plasmodium protein, unknown function                                  | -0.14 | 43.09   | 44.18    |
| PF3D7_1032800   | leucine-rich repeat protein (LRR1)                                              | 0.14  | 6.33    | 7.90     |
| PF3D7_1032900   | RNA polymerase II-associated protein 1, putative                                | -1.47 | 13.92   | 5.68     |
| PF3D7_1033000   | conserved Plasmodium protein, unknown function                                  | -0.20 | 15.23   | 14.96    |
| PF3D7_1033100   | S-adenosylmethionine decarboxylase/ornithine decarboxylase (AdoMetDC/ODC)       | -0.96 | 937.67  | 544.66   |
| PF3D7_1033200   | early transcribed membrane protein 10.2 (ETRAPM10.2)                            | -0.52 | 185.09  | 146.27   |
| PF3D7_1033300   | conserved Plasmodium protein, unknown function                                  | 0.17  | 32.29   | 41.09    |
| PF3D7_1033400   | haloacid dehalogenase-like hydrolase (HAD1)                                     | -1.51 | 504.21  | 200.37   |
| PF3D7_1033500   | WD repeat-containing protein 70, putative (WDR70)                               | -1.55 | 56.27   | 21.64    |
| PF3D7_1033600   | myb2 transcription factor, putative (Myb2)                                      | -0.68 | 139.17  | 98.39    |
| PF3D7_1033700   | bromodomain protein 1 (BDP1)                                                    | -1.18 | 114.62  | 57.26    |
| PF3D7_1033800   | plasmepsin VII                                                                  | 1.07  | 0.83    | 1.99     |
| PF3D7_1033900   | ubiquitin-conjugating enzyme, putative                                          | 0.26  | 47.64   | 64.26    |
| PF3D7_1034000   | Sec1 family protein, putative                                                   | -1.28 | 38.76   | 18.01    |
| PF3D7_1034100   | conserved Plasmodium protein, unknown function                                  | -1.15 | 0.58    | 0.28     |
| PF3D7_1034200   | apicoplast ribosomal protein L27 precursor, putative                            | -1.00 | 3.54    | 1.99     |
| PF3D7_1034300   | thioredoxin-like associated protein 2, putative (TLAP2)                         | 0.95  | 0.07    | 0.17     |
| PF3D7_1034400   | flavoprotein subunit of succinate dehydrogenase (SDHA)                          | 1.01  | 11.58   | 26.38    |
| PF3D7_1034500   | conserved Plasmodium protein, unknown function                                  | 0.48  | 7.40    | 11.65    |
| PF3D7_1034600   | translation initiation factor IF-3, putative (IF3b)                             | 0.58  | 21.13   | 35.62    |
| PF3D7_1034700   | ADP-ribosylation factor, putative                                               | -0.13 | 28.24   | 29.11    |
| PF3D7_1034800   | conserved Plasmodium protein, unknown function                                  | 0.64  | 6.16    | 10.83    |
| PF3D7_1034900   | methionine-tRNA ligase (MRScyt)                                                 | -0.77 | 149.13  | 98.49    |
| PF3D7_1035000   | U2 snRNA/tRNA pseudouridine synthase, putative                                  | -0.79 | 12.20   | 7.94     |
| PF3D7_1035100   | probable protein, unknown function                                              | 0.86  | 32.31   | 66.05    |
| PF3D7_1035200   | S-antigen                                                                       | 0.74  | 7634.79 | 14382.80 |
| PF3D7_1035300   | glutamate-rich protein (GLURP)                                                  | 2.89  | 58.20   | 488.34   |
| PF3D7_1035400   | merozoite surface protein 3 (MSP3)                                              | 3.42  | 242.86  | 2938.41  |
| PF3D7_1035500   | merozoite surface protein 6 (MSP6)                                              | 3.56  | 152.18  | 2026.40  |
| PF3D7_1035600   | merozoite surface protein (H101)                                                | 1.54  | 20.33   | 66.57    |
| PF3D7_1035700   | duffy binding-like merozoite surface protein (DBLMSP)                           | 2.15  | 140.17  | 701.98   |
| PF3D7_1035800   | probable protein, unknown function (M712)                                       | -4.67 | 528.48  | 23.50    |
| PF3D7_1035900   | probable protein, unknown function (M566)                                       | 2.58  | 127.97  | 863.22   |
| PF3D7_1036000   | merozoite surface protein (MSP11)                                               | 3.63  | 26.52   | 370.80   |
| PF3D7_1036300   | merozoite surface protein (DBLMSP2)                                             | 2.68  | 9.02    | 65.50    |
| PF3D7_1036400   | liver stage antigen 1 (LSA1)                                                    | 1.99  | 1.52    | 6.83     |
| PF3D7_1036500   | probable protein, unknown function                                              | 3.33  | 32.48   | 368.39   |
| PF3D7_1036600.1 | conserved Plasmodium protein, unknown function                                  | 1.63  | 2.47    | 8.73     |
| PF3D7_1036600.2 | conserved Plasmodium protein, unknown function                                  | 1.65  | 2.47    | 8.82     |
| PF3D7_1036700   | phosducin-like protein, putative (PhLP2)                                        | 0.88  | 5.17    | 10.81    |
| PF3D7_1036800   | acetyl-CoA transporter, putative                                                | -0.19 | 16.35   | 16.24    |
| PF3D7_1036900   | conserved Plasmodium protein, unknown function                                  | -0.29 | 375.95  | 346.98   |
| PF3D7_1037000   | DNA polymerase zeta catalytic subunit, putative                                 | 0.93  | 5.78    | 12.47    |
| PF3D7_1037100   | pyruvate kinase 2 (PyKII)                                                       | 0.54  | 8.55    | 14.04    |
| PF3D7_1037200   | conserved Plasmodium protein, unknown function                                  | 0.20  | 1.14    | 1.48     |
| PF3D7_1037300   | ADP/ATP transporter on adenylate translocase (ADT)                              | -1.21 | 439.39  | 214.98   |
| PF3D7_1037400   | conserved Plasmodium protein, unknown function                                  | 1.75  | 1.63    | 6.21     |
| PF3D7_1037500   | dynammin-like protein (DYN2)                                                    | 0.80  | 17.98   | 35.35    |
| PF3D7_1037600   | DNA repair helicase RAD25, putative                                             | -1.03 | 81.67   | 45.30    |
| PF3D7_1037700   | enhancer of rudimentary homolog, putative (ERH)                                 | -2.64 | 85.58   | 15.45    |
| PF3D7_1037800   | dynein intermediate chain, putative                                             | 0.40  | 0.70    | 1.05     |
| PF3D7_1037900   | conserved Plasmodium protein, unknown function                                  | -1.22 | 9.30    | 4.51     |
| PF3D7_1038000.1 | antigen UB05                                                                    | 0.52  | 696.01  | 1128.49  |
| PF3D7_1038000.2 | antigen UB05                                                                    | 0.51  | 699.45  | 1128.40  |
| PF3D7_1038100   | GDP dissociation inhibitor, putative                                            | -1.47 | 24.27   | 9.92     |
| PF3D7_1038200   | conserved Plasmodium protein, unknown function                                  | -1.73 | 13.41   | 4.51     |
| PF3D7_1038300   | conserved Plasmodium protein, unknown function                                  | 0.21  | 0.14    | 0.19     |
| PF3D7_1038400   | gametocyte-specific protein (Pfl1-1)                                            | 1.40  | 0.91    | 2.73     |
| PF3D7_1038500   | Plasmodium exported protein, unknown function                                   | -0.49 | 2.53    | 2.03     |
| PF3D7_1038600   | Plasmodium exported protein, unknown function                                   | 0.17  | 1.01    | 1.29     |
| PF3D7_1038700   | Plasmodium exported protein, unknown function                                   | -1.30 | 13.05   | 5.97     |

|                 |                                                                    |       |          |          |
|-----------------|--------------------------------------------------------------------|-------|----------|----------|
| PF3D7_1038800   | RESA-like protein with PHIST and DnaJ domains                      | -1.63 | 82.48    | 30.02    |
| PF3D7_1038900   | lysophospholipase, putative                                        | -0.63 | 5.14     | 3.75     |
| PF3D7_1039000   | serine/threonine protein kinase, FIKK family (FIKK10.2)            | -1.27 | 138.45   | 64.64    |
| PF3D7_1039100   | DnaJ protein, putative, pseudogene                                 | 2.48  | 3.69     | 23.25    |
| PF3D7_1039200   | Plasmodium exported protein, unknown function, pseudogene          | 1.86  | 4.50     | 18.59    |
| PF3D7_1039300   | unspecified product                                                | 2.84  | 3.05     | 24.85    |
| PF3D7_1039400   | erythrocyte membrane protein 1 (PEMP1), pseudogene                 | -0.42 | 1.68     | 1.42     |
| PF3D7_1039600   | exported protein family 1, pseudogene (EPF1)                       | -0.90 | 6.60     | 4.00     |
| PF3D7_1039700   | Pfmc-2TM Maurer's cleft two transmembrane protein (MC-2TM)         | 0.79  | 0.77     | 1.54     |
| PF3D7_1039800   | exported protein family 3 (EPF3)                                   | -3.38 | 99.33    | 10.74    |
| PF3D7_1039900   | exported protein family 4 (EPF4)                                   | -3.55 | 130.41   | 12.55    |
| PF3D7_1040000   | rifin (RIF)                                                        | 0.04  | 0.17     | 0.20     |
| PF3D7_1040100   | rifin (RIF)                                                        | -1.15 | 0.26     | 0.13     |
| PF3D7_1040200   | stevor                                                             | 2.10  | 0.15     | 0.81     |
| PF3D7_1040300   | rifin (RIF)                                                        | 0.65  | 0.45     | 0.82     |
| PF3D7_1040400   | rifin (RIF)                                                        | -3.70 | 0.19     | 0.00     |
| PF3D7_1040500   | rifin (RIF)                                                        | 1.95  | 0.00     | 0.07     |
| PF3D7_1040600   | rifin (RIF)                                                        | 0.30  | 0.09     | 0.14     |
| PF3D7_1040700   | rifin (RIF)                                                        | -0.38 | 0.08     | 0.07     |
| PF3D7_1040800   | rifin (RIF)                                                        | 0.76  | 0.10     | 0.22     |
| PF3D7_1040900   | rifin (RIF)                                                        | 3.71  | 0.00     | 0.33     |
| PF3D7_1041000   | rifin (RIF)                                                        | 0.85  | 0.16     | 0.35     |
| PF3D7_1041100   | rifin (RIF)                                                        | -0.64 | 0.11     | 0.08     |
| PF3D7_1041200   | rifin (RIF)                                                        | 0.45  | 0.16     | 0.26     |
| PF3D7_1041300   | erythrocyte membrane protein 1, PfEMP1 (VAR)                       | 0.14  | 1.44     | 1.79     |
| PF3D7_1100100   | erythrocyte membrane protein 1, PfEMP1 (VAR)                       | 0.76  | 5.62     | 10.75    |
| PF3D7_1100200   | erythrocyte membrane protein 1, PfEMP1 (VAR)                       | -0.67 | 2.41     | 1.71     |
| PF3D7_1100300   | rifin (RIF)                                                        | -1.00 | 0.35     | 0.19     |
| PF3D7_1100400   | rifin (RIF)                                                        | -0.38 | 0.00     | 0.00     |
| PF3D7_1100500   | rifin (RIF)                                                        | 0.71  | 0.36     | 0.69     |
| PF3D7_1100600   | Plasmodium exported protein (PHISTa), unknown function, pseudogene | -0.38 | 0.00     | 0.00     |
| PF3D7_1100700   | stevor, pseudogene                                                 | 3.21  | 0.00     | 0.25     |
| PF3D7_1100800   | Pfmc-2TM Maurer's cleft two transmembrane protein (MC-2TM)         | 0.16  | 0.32     | 0.42     |
| PF3D7_1100900   | RESA-like protein, pseudogene                                      | -0.38 | 0.27     | 0.23     |
| PF3D7_1101000   | erythrocyte membrane protein 1 (PEMP1), truncated                  | 4.79  | 0.00     | 1.70     |
| PF3D7_1101100   | rifin (RIF)                                                        | 1.69  | 1.62     | 5.96     |
| PF3D7_1101200   | rifin (RIF)                                                        | 1.91  | 0.38     | 1.67     |
| PF3D7_1101300   | rifin (RIF)                                                        | 0.49  | 0.23     | 0.37     |
| PF3D7_1101400   | rifin, pseudogene (RIF)                                            | -1.82 | 0.37     | 0.11     |
| PF3D7_1101500   | exported protein family 4 (EPF4)                                   | -4.56 | 98.88    | 4.73     |
| PF3D7_1101600   | exported protein family 3 (EPF3)                                   | -5.69 | 61.70    | 1.32     |
| PF3D7_1101700   | Pfmc-2TM Maurer's cleft two transmembrane protein (MC-2TM)         | 1.16  | 0.87     | 2.24     |
| PF3D7_1101800   | exported protein family 1 (EPF1)                                   | -0.52 | 11.61    | 9.16     |
| PF3D7_1101900   | erythrocyte membrane protein 1 (PEMP1), truncated, pseudogene      | -0.28 | 0.68     | 0.64     |
| PF3D7_1102000   | unspecified product                                                | 0.91  | 0.25     | 0.53     |
| PF3D7_1102100   | Plasmodium exported protein, unknown function, pseudogene          | 2.45  | 3.41     | 21.34    |
| PF3D7_1102200   | DnaJ protein, putative                                             | 2.37  | 1.26     | 7.47     |
| PF3D7_1102300   | Plasmodium exported protein, unknown function                      | 1.40  | 6.96     | 20.80    |
| PF3D7_1102400   | flavoprotein, putative                                             | -1.13 | 33.27    | 17.20    |
| PF3D7_1102500   | Plasmodium exported protein (PHISTb), unknown function (GEXP02)    | 1.29  | 8.90     | 24.60    |
| PF3D7_1102600   | Plasmodium exported protein, unknown function (GEXP14)             | 0.46  | 5.68     | 8.84     |
| PF3D7_1102700   | early transcribed membrane protein 11.1 (ETRAMP11.1)               | -0.45 | 1235.47  | 1024.80  |
| PF3D7_1102800   | early transcribed membrane protein 11.2 (ETRAMP11.2)               | 0.02  | 11199.40 | 12846.90 |
| PF3D7_1102900   | Plasmodium exported protein (hyp11), unknown function              | -1.51 | 44.45    | 17.63    |
| PF3D7_1103000   | conserved Plasmodium protein, unknown function                     | -0.77 | 5.36     | 3.53     |
| PF3D7_1103100   | 60S acidic ribosomal protein P1, putative (RPP1)                   | -0.64 | 832.99   | 605.24   |
| PF3D7_1103200   | tRNA Glycine                                                       | -0.38 | 0.00     | 0.00     |
| PF3D7_1103300   | tRNA Leucine                                                       | 2.62  | 0.00     | 1.38     |
| PF3D7_1103400   | FeS cluster assembly protein SufD, putative (SufD)                 | 0.41  | 11.98    | 18.01    |
| PF3D7_1103500   | CPW-WPC family protein                                             | 1.66  | 0.47     | 1.72     |
| PF3D7_1103600   | actin-like protein, putative (ALP2a)                               | -1.14 | 28.12    | 14.42    |
| PF3D7_1103700   | casein kinase II beta chain (CK2beta1)                             | -1.18 | 127.72   | 63.52    |
| PF3D7_1103800   | CCR4-NOT transcription complex subunit 1, putative (NOT1)          | 1.94  | 11.22    | 48.73    |
| PF3D7_1103900   | conserved Plasmodium protein, unknown function                     | -2.00 | 18.43    | 5.13     |
| PF3D7_1104000   | phenylalanine--tRNA ligase beta subunit                            | -1.62 | 89.35    | 32.91    |
| PF3D7_1104100   | syntaxin, Qa-SNARE family (SYN13)                                  | -1.32 | 75.09    | 33.90    |
| PF3D7_1104200   | chromatin remodeling protein (SNF2L)                               | -1.41 | 190.97   | 81.09    |
| PF3D7_1104300   | conserved Plasmodium protein, unknown function                     | 0.30  | 19.35    | 26.97    |
| PF3D7_1104400   | conserved protein, unknown function                                | -1.28 | 252.79   | 117.40   |
| PF3D7_1104500   | WD repeat-containing protein, putative                             | 1.30  | 0.30     | 0.86     |
| PF3D7_1104600   | radial spoke head protein, putative                                | 1.08  | 0.66     | 1.59     |
| PF3D7_1104700.1 | RNA polymerase subunit, putative                                   | -0.75 | 49.19    | 33.11    |
| PF3D7_1104700.2 | RNA polymerase subunit, putative                                   | -0.75 | 49.36    | 33.08    |
| PF3D7_1104800   | metabolite/drug transporter, putative                              | -0.79 | 31.69    | 20.72    |
| PF3D7_1104900   | calcium/calmodulin-dependent protein kinase, putative              | 2.07  | 15.43    | 73.18    |
| PF3D7_1105000   | histone H4 (H4)                                                    | 1.94  | 820.17   | 3564.67  |
| PF3D7_1105100   | histone H2B (H2B)                                                  | 2.29  | 1085.56  | 5992.46  |
| PF3D7_1105200   | WD repeat-containing protein WRAP73, putative (WDR8)               | 1.18  | 0.79     | 2.04     |
| PF3D7_1105300   | conserved Plasmodium protein, unknown function                     | -0.15 | 21.66    | 22.03    |
| PF3D7_1105400   | 40S ribosomal protein S4, putative                                 | -0.91 | 1654.44  | 992.20   |
| PF3D7_1105500   | centrin-4 (CEN4)                                                   | 0.77  | 15.67    | 30.14    |
| PF3D7_1105600   | translocon component PTEX88 (PTEX88)                               | -0.44 | 268.59   | 223.76   |
| PF3D7_1105700   | tRNA-splicing ligase RtcB, putative (RTCB)                         | -0.44 | 107.55   | 89.65    |
| PF3D7_1105800   | conserved Plasmodium protein, unknown function                     | -0.24 | 85.18    | 81.66    |
| PF3D7_1105900   | conserved Plasmodium membrane protein, unknown function            | -0.80 | 17.23    | 11.14    |
| PF3D7_1106000   | RuvB-like helicase 2 (RUVB2)                                       | -1.17 | 123.32   | 62.07    |
| PF3D7_1106100   | apicoplast ribosomal protein S15 precursor, putative               | 0.19  | 13.05    | 16.80    |
| PF3D7_1106200   | conserved Plasmodium protein, unknown function                     | -0.43 | 3.46     | 2.91     |
| PF3D7_1106300   | exonuclease, putative                                              | 0.63  | 18.49    | 32.24    |
| PF3D7_1106400   | conserved Plasmodium protein, unknown function                     | 0.50  | 5.68     | 9.11     |
| PF3D7_1106500   | conserved Plasmodium protein, unknown function                     | -0.44 | 19.97    | 16.62    |
| PF3D7_1106600   | DEAD/DEAH box helicase, putative                                   | 0.87  | 3.21     | 6.63     |
| PF3D7_1106700   | dna2/nam7 helicase family member, putative                         | -0.49 | 27.34    | 21.99    |
| PF3D7_1106800   | protein kinase, putative                                           | -0.34 | 11.18    | 10.00    |
| PF3D7_1106900   | conserved Plasmodium protein, unknown function                     | -0.21 | 8.66     | 8.46     |
| PF3D7_1107000   | U6 snRNA-associated Sm-like protein LSM4, putative (LSM4)          | 0.28  | 24.34    | 33.40    |
| PF3D7_1107100   | nucleic acid binding protein, putative                             | 0.28  | 24.16    | 33.06    |
| PF3D7_1107200   | conserved Plasmodium protein, unknown function                     | -0.41 | 29.04    | 24.73    |

|                 |                                                                                              |       |         |         |
|-----------------|----------------------------------------------------------------------------------------------|-------|---------|---------|
| PF3D7_1107300   | polyadenylate-binding protein-interacting protein 1, putative (PAIP1)                        | -0.63 | 318.10  | 232.84  |
| PF3D7_1107400   | DNA repair protein RAD51 (RAD51)                                                             | 0.49  | 30.04   | 47.72   |
| PF3D7_1107500   | prefoldin, putative                                                                          | -0.93 | 17.90   | 10.58   |
| PF3D7_1107600   | conserved Plasmodium protein, unknown function                                               | -1.22 | 0.82    | 0.40    |
| PF3D7_1107700   | pescadillo homolog (PES)                                                                     | -0.79 | 104.02  | 68.12   |
| PF3D7_1107800   | transcription factor with AP2 domain(s) (ApiAP2)                                             | -0.10 | 98.87   | 104.19  |
| PF3D7_1107900   | mechanosensitive ion channel protein                                                         | 0.90  | 6.87    | 14.43   |
| PF3D7_1108000   | IWS1-like protein, putative                                                                  | 0.13  | 115.96  | 143.52  |
| PF3D7_1108100   | conserved Plasmodium protein, unknown function                                               | 1.38  | 19.71   | 57.96   |
| PF3D7_1108200   | D-tyrosyl-tRNA(Tyr) deacylase (DTD)                                                          | -0.27 | 42.22   | 39.57   |
| PF3D7_1108300   | pterin-4a-carbinolamine dehydratase (PCD)                                                    | 0.56  | 7.95    | 13.29   |
| PF3D7_1108400   | casein kinase 2, alpha subunit (CK2alpha)                                                    | -0.86 | 304.24  | 189.37  |
| PF3D7_1108500   | succinyl-CoA synthetase alpha subunit, putative                                              | 1.04  | 37.38   | 86.58   |
| PF3D7_1108600   | endoplasmic reticulum-resident calcium binding protein (ERC)                                 | -0.03 | 662.14  | 734.55  |
| PF3D7_1108700   | heat shock protein DnaJ homologue Pfj2                                                       | -0.70 | 253.39  | 176.47  |
| PF3D7_1108800   | conserved Plasmodium protein, unknown function                                               | -1.69 | 5.17    | 1.79    |
| PF3D7_1108900   | conserved Plasmodium protein, unknown function                                               | -2.09 | 19.20   | 5.07    |
| PF3D7_1109000   | small nucleolar RNA snoR07                                                                   | -0.91 | 2.54    | 1.47    |
| PF3D7_1109100   | conserved Plasmodium protein, unknown function                                               | 0.72  | 0.92    | 1.72    |
| PF3D7_1109200   | pre-mRNA splicing factor, putative                                                           | 0.28  | 3.58    | 4.91    |
| PF3D7_1109300   | small nucleolar RNA snR61/Z1/Z11                                                             | 0.95  | 0.33    | 1.15    |
| PF3D7_1109400   | U3/U14 snoRNA-associated small subunit rRNA processing protein, putative                     | -0.88 | 224.44  | 137.93  |
| PF3D7_1109500   | small nucleolar RNA snoR09                                                                   | 0.25  | 6.06    | 8.25    |
| PF3D7_1109600   | small nucleolar RNA SNORD127                                                                 | -1.01 | 78.26   | 43.68   |
| PF3D7_1109700   | small nucleolar RNA snoR11                                                                   | -1.20 | 4.97    | 2.40    |
| PF3D7_1109800   | small nucleolar RNA snoR12                                                                   | -0.38 | 0.00    | 0.00    |
| PF3D7_1109900   | 60S ribosomal protein L36 (RPL36)                                                            | -0.59 | 1064.28 | 798.76  |
| PF3D7_1110000   | conserved Plasmodium protein, unknown function                                               | -0.49 | 18.44   | 14.79   |
| PF3D7_1110100   | conserved Plasmodium protein, unknown function                                               | -1.03 | 37.95   | 20.99   |
| PF3D7_1110200   | pre-mRNA-processing factor 6, putative (PRPF6)                                               | -0.17 | 138.17  | 138.90  |
| PF3D7_1110300   | conserved Plasmodium protein, unknown function                                               | -0.97 | 117.18  | 67.69   |
| PF3D7_1110400   | asparagine-rich antigen                                                                      | -0.93 | 739.93  | 438.13  |
| PF3D7_1110500   | vacuolar protein sorting-associated protein 35, putative (VPS35)                             | 0.34  | 15.42   | 22.01   |
| PF3D7_1110600   | mitochondrial ribosomal protein L11 precursor, putative                                      | 1.28  | 24.99   | 68.78   |
| PF3D7_1110700   | actin-like protein, putative (ALP1)                                                          | 0.52  | 25.30   | 40.95   |
| PF3D7_1110800   | conserved Plasmodium protein, unknown function                                               | -0.04 | 1.63    | 1.80    |
| PF3D7_1110900   | ES2 protein, putative                                                                        | -0.79 | 65.01   | 42.60   |
| PF3D7_1111000   | tRNA m5C-methyltransferase, putative                                                         | -1.93 | 29.02   | 8.57    |
| PF3D7_1111100   | replication factor C subunit 5, putative (RFC5)                                              | 0.71  | 29.67   | 54.93   |
| PF3D7_1111200   | conserved Plasmodium protein, unknown function                                               | -0.81 | 18.50   | 11.88   |
| PF3D7_1111300   | SNARE protein, putative (GS27)                                                               | -1.83 | 20.91   | 6.61    |
| PF3D7_1111400   | conserved Plasmodium protein, unknown function                                               | -1.05 | 26.47   | 14.40   |
| PF3D7_1111500   | acylphosphatase, putative                                                                    | 0.11  | 20.73   | 25.29   |
| PF3D7_1111600   | endonuclease/exonuclease/phosphatase family protein, putative                                | 0.37  | 1.83    | 2.68    |
| PF3D7_1111700   | conserved Plasmodium protein, unknown function                                               | -1.78 | 13.00   | 4.26    |
| PF3D7_1111800   | peptidyl-prolyl cis-trans isomerase, putative                                                | 0.33  | 5.87    | 8.38    |
| PF3D7_1111900   | conserved Plasmodium protein, unknown function                                               | 0.47  | 4.13    | 6.47    |
| PF3D7_1112000   | conserved Plasmodium protein, unknown function                                               | -0.04 | 18.51   | 20.38   |
| PF3D7_1112100   | conserved Plasmodium protein, unknown function                                               | 1.11  | 18.16   | 44.28   |
| PF3D7_1112200   | ubiquinone biosynthesis protein COQ4, putative (COQ4)                                        | 0.53  | 2.37    | 3.87    |
| PF3D7_1112300   | conserved Plasmodium protein, unknown function                                               | 0.48  | 1.24    | 1.97    |
| PF3D7_1112400   | conserved Plasmodium protein, unknown function                                               | 0.78  | 8.40    | 16.31   |
| PF3D7_1112500   | conserved protein, unknown function                                                          | -2.23 | 38.54   | 9.24    |
| PF3D7_1112600   | DNA helicase, putative                                                                       | 0.72  | 7.42    | 13.80   |
| PF3D7_1112700   | conserved Plasmodium protein, unknown function                                               | 0.02  | 1.49    | 1.71    |
| PF3D7_1112800   | conserved protein, unknown function                                                          | -0.70 | 2.81    | 1.95    |
| PF3D7_1112900   | conserved Plasmodium protein, unknown function                                               | 0.24  | 3.63    | 4.84    |
| PF3D7_1113000   | conserved Plasmodium protein, unknown function                                               | 0.48  | 5.73    | 9.02    |
| PF3D7_1113100   | protein tyrosine phosphatase (PRL)                                                           | -0.45 | 438.75  | 362.16  |
| PF3D7_1113200   | conserved Plasmodium protein, unknown function                                               | -0.19 | 30.21   | 29.94   |
| PF3D7_1113300   | UDP-galactose transporter, putative                                                          | -0.04 | 25.96   | 28.44   |
| PF3D7_1113400   | ubiquitin domain-containing protein DSK2, putative (DSK2)                                    | -0.25 | 247.32  | 235.15  |
| PF3D7_1113500   | GTP-binding protein, putative                                                                | -0.08 | 24.55   | 26.28   |
| PF3D7_1113600   | conserved Plasmodium protein, unknown function                                               | -0.62 | 67.32   | 49.63   |
| PF3D7_1113700   | glyoxalase I (GloI)                                                                          | -1.06 | 51.05   | 27.64   |
| PF3D7_1113800   | conserved Plasmodium membrane protein, unknown function                                      | -1.02 | 15.35   | 8.57    |
| PF3D7_1113900   | mitogen-activated protein kinase 2 (MAPK2)                                                   | 1.24  | 1.75    | 4.68    |
| PF3D7_1114000   | dynein light chain type 2, putative                                                          | 2.09  | 1.15    | 5.68    |
| PF3D7_1114100.1 | rhomboid protease ROM1 (ROM1)                                                                | 1.26  | 43.76   | 118.76  |
| PF3D7_1114100.2 | rhomboid protease ROM1 (ROM1)                                                                | 1.26  | 43.51   | 117.83  |
| PF3D7_1114200   | GTPase-activating protein, putative                                                          | -0.17 | 113.76  | 114.41  |
| PF3D7_1114300   | unspecified product                                                                          | -1.96 | 0.13    | 0.00    |
| PF3D7_1114400   | conserved Plasmodium protein, unknown function                                               | 0.57  | 1.50    | 2.52    |
| PF3D7_1114500   | conserved Plasmodium protein, unknown function                                               | 0.72  | 1.64    | 3.06    |
| PF3D7_1114600   | conserved Plasmodium protein, unknown function                                               | 0.61  | 1.22    | 2.13    |
| PF3D7_1114700   | serine/threonine protein kinase, putative (CLK3)                                             | -0.31 | 151.90  | 138.58  |
| PF3D7_1114800   | glycerol-3-phosphate dehydrogenase, putative (G3PDH)                                         | 0.83  | 3.04    | 6.13    |
| PF3D7_1114900   | conserved Plasmodium protein, unknown function                                               | 0.61  | 6.39    | 11.03   |
| PF3D7_1115000   | conserved Plasmodium protein, unknown function                                               | 1.37  | 7.21    | 21.14   |
| PF3D7_1115100   | conserved Plasmodium protein, unknown function                                               | 0.11  | 5.16    | 6.31    |
| PF3D7_1115200   | SET domain protein, putative (SET7)                                                          | -1.11 | 107.41  | 56.34   |
| PF3D7_1115300   | cysteine proteinase falcipain 2b (FP2B)                                                      | -1.62 | 215.48  | 79.00   |
| PF3D7_1115400   | cysteine proteinase falcipain 3 (FP3)                                                        | -0.73 | 231.96  | 157.58  |
| PF3D7_1115500   | transcription factor with AP2 domain(s), putative (ApiAP2)                                   | 0.44  | 38.07   | 58.42   |
| PF3D7_1115600   | peptidyl-prolyl cis-trans isomerase (CYP19B)                                                 | 0.23  | 166.36  | 220.86  |
| PF3D7_1115700   | cysteine proteinase falcipain 2a (FP2A)                                                      | -0.22 | 227.94  | 220.89  |
| PF3D7_1115800   | conserved Plasmodium protein, unknown function                                               | 0.59  | 614.78  | 1043.81 |
| PF3D7_1115900   | palmitoyltransferase, putative (DHH9)                                                        | 0.29  | 24.10   | 33.32   |
| PF3D7_1116000   | rhopty neck protein 4 (RON4)                                                                 | -0.17 | 302.83  | 304.04  |
| PF3D7_1116100   | serine esterase, putative                                                                    | 1.79  | 35.99   | 140.50  |
| PF3D7_1116200.1 | pyridoxine biosynthesis protein PDX2 (PDX2)                                                  | -2.05 | 38.52   | 10.45   |
| PF3D7_1116200.2 | pyridoxine biosynthesis protein PDX2 (PDX2)                                                  | -2.05 | 40.08   | 10.89   |
| PF3D7_1116300   | peptidyl-prolyl cis-trans isomerase (CYP19C)                                                 | -0.76 | 75.87   | 50.62   |
| PF3D7_1116400   | guanine nucleotide-exchange factor SEC12 (SEC12)                                             | -0.71 | 115.64  | 79.75   |
| PF3D7_1116500   | folate transporter 2 (FT2)                                                                   | -0.13 | 31.00   | 31.89   |
| PF3D7_1116600   | dolichyl-diphosphooligosaccharide--protein glycosyltransferase subunit STT3, putative (STT3) | 0.26  | 18.05   | 24.35   |
| PF3D7_1116700   | dipeptidyl aminopeptidase 1 (DPAP1)                                                          | -0.47 | 613.98  | 499.09  |
| PF3D7_1116800   | heat shock protein 101 (HSP101)                                                              | -0.22 | 898.50  | 870.66  |

|                 |                                                                                 |       |         |         |
|-----------------|---------------------------------------------------------------------------------|-------|---------|---------|
| PF3D7_1116900   | conserved Plasmodium protein, unknown function                                  | 1.27  | 4.80    | 13.12   |
| PF3D7_1117000   | conserved Plasmodium membrane protein, unknown function                         | 0.23  | 2.02    | 2.68    |
| PF3D7_1117100   | deubiquinating/deneddylating enzyme (UCH54)                                     | -0.01 | 27.45   | 30.80   |
| PF3D7_1117200   | conserved Plasmodium protein, unknown function                                  | 1.01  | 0.47    | 1.08    |
| PF3D7_1117300   | conserved Plasmodium protein, unknown function                                  | -2.25 | 118.83  | 28.25   |
| PF3D7_1117400   | conserved Plasmodium protein, unknown function                                  | 1.37  | 36.08   | 105.09  |
| PF3D7_1117500   | tyrosine--tRNA ligase                                                           | 1.01  | 7.08    | 16.13   |
| PF3D7_1117600.1 | peptidyl-tRNA hydrolase ICT1, putative (ICT1)                                   | 1.11  | 8.82    | 21.56   |
| PF3D7_1117600.2 | peptidyl-tRNA hydrolase ICT1, putative (ICT1)                                   | 1.22  | 8.66    | 22.91   |
| PF3D7_1117700   | GTP-binding nuclear protein RAN/TC4 (RAN)                                       | -0.45 | 1171.48 | 970.80  |
| PF3D7_1117800   | DNA mismatch repair protein MLH (MLH)                                           | -0.35 | 25.49   | 22.58   |
| PF3D7_1117900   | conserved Plasmodium protein, unknown function                                  | 0.06  | 12.56   | 14.83   |
| PF3D7_1118000   | conserved Plasmodium protein, unknown function                                  | -0.12 | 19.32   | 20.04   |
| PF3D7_1118100   | AP-1 complex subunit sigma, putative                                            | -1.47 | 56.57   | 23.07   |
| PF3D7_1118200   | heat shock protein 90, putative                                                 | -0.33 | 48.26   | 43.45   |
| PF3D7_1118300   | insulinase, putative                                                            | -1.21 | 282.49  | 137.79  |
| PF3D7_1118400   | haloacid dehalogenase-like hydrolase, putative                                  | -0.79 | 47.09   | 30.66   |
| PF3D7_1118500   | box C/D snoRNP rRNA 2'-O-methylation factor, putative                           | -1.10 | 245.59  | 129.77  |
| PF3D7_1118600   | histone acetyltransferase (MYST)                                                | -0.60 | 92.48   | 69.10   |
| PF3D7_1118700   | myosin light chain B (MLC-B)                                                    | 1.37  | 25.52   | 74.70   |
| PF3D7_1118800   | actin-related protein 2/3 complex subunit 1, putative (ARC40)                   | 0.17  | 3.09    | 3.93    |
| PF3D7_1118900   | conserved Plasmodium protein, unknown function                                  | 0.13  | 1.26    | 1.57    |
| PF3D7_1119000   | acyl-CoA-binding protein, putative                                              | 0.46  | 21.62   | 33.50   |
| PF3D7_1119100   | tRNA m(1)G methyltransferase, putative                                          | -0.68 | 13.65   | 9.62    |
| PF3D7_1119200   | conserved protein, unknown function                                             | -2.26 | 41.68   | 9.77    |
| PF3D7_1119300   | splicing factor U2AF small subunit, putative (U2AF1)                            | -0.45 | 158.72  | 131.02  |
| PF3D7_1119400   | ubiquitin-protein ligase, putative                                              | -1.31 | 53.31   | 24.34   |
| PF3D7_1119500   | AP-4 complex subunit mu, putative                                               | -1.11 | 30.38   | 15.85   |
| PF3D7_1119600   | ATP-dependent zinc metalloprotease FTSH, putative                               | -0.50 | 34.48   | 27.52   |
| PF3D7_1119700   | conserved Plasmodium protein, unknown function                                  | 0.05  | 16.20   | 18.90   |
| PF3D7_1119800   | alternative splicing factor ASF-1, putative (ASF1)                              | -0.77 | 57.06   | 37.69   |
| PF3D7_1119900   | conserved Plasmodium protein, unknown function                                  | -1.86 | 74.54   | 23.25   |
| PF3D7_1120000   | conserved Plasmodium protein, unknown function                                  | -1.06 | 163.18  | 88.63   |
| PF3D7_1120100   | phosphoglycerate mutase, putative (PGM1)                                        | -1.38 | 1709.13 | 743.66  |
| PF3D7_1120200   | conserved Plasmodium protein, unknown function                                  | -0.99 | 48.62   | 27.69   |
| PF3D7_1120300   | magnesium transporter, putative                                                 | 0.07  | 11.23   | 13.32   |
| PF3D7_1120400   | alpha/beta hydrolase fold domain containing protein, putative                   | -1.44 | 111.24  | 46.24   |
| PF3D7_1120500   | tRNA nucleotidyltransferase, putative                                           | -1.28 | 71.75   | 33.30   |
| PF3D7_1120600   | conserved Plasmodium protein, unknown function                                  | 1.03  | 2.21    | 5.10    |
| PF3D7_1120700   | conserved Plasmodium protein, unknown function                                  | 0.81  | 2.65    | 5.25    |
| PF3D7_1120800   | conserved Plasmodium protein, unknown function                                  | 0.72  | 11.56   | 21.66   |
| PF3D7_1120900   | heat shock factor-binding protein 1 (HSBP)                                      | 0.31  | 18.40   | 25.76   |
| PF3D7_1121000   | palmitoyltransferase, putative (DHHC3)                                          | 0.55  | 8.25    | 13.70   |
| PF3D7_1121100   | conserved Plasmodium protein, unknown function                                  | -0.84 | 79.22   | 49.99   |
| PF3D7_1121200   | conserved Plasmodium protein, unknown function                                  | -0.15 | 3.11    | 3.17    |
| PF3D7_1121300   | tyrosine kinase-like protein (TKL2)                                             | 0.08  | 11.75   | 14.05   |
| PF3D7_1121400   | WD repeat-containing protein, putative                                          | 0.96  | 1.26    | 2.77    |
| PF3D7_1121500   | conserved Plasmodium protein, unknown function                                  | 0.77  | 2.65    | 5.12    |
| PF3D7_1121600   | exported protein 1 (EXP1)                                                       | 1.47  | 1047.15 | 3286.34 |
| PF3D7_1121700   | protein GCN20 (GCN20)                                                           | -0.70 | 106.12  | 73.87   |
| PF3D7_1121800   | petidase, M16 family                                                            | 2.06  | 0.51    | 2.41    |
| PF3D7_1121900   | serine/threonine protein kinase, putative                                       | -0.14 | 6.20    | 6.35    |
| PF3D7_1122000   | conserved Plasmodium protein, unknown function                                  | 0.02  | 1.97    | 2.26    |
| PF3D7_1122100   | GPI transamidase component GPI16, putative (GPI16)                              | -0.29 | 6.02    | 5.55    |
| PF3D7_1122200   | cupin-like protein, putative                                                    | -1.11 | 72.81   | 38.09   |
| PF3D7_1122300   | conserved Plasmodium protein, unknown function                                  | -1.79 | 50.04   | 16.33   |
| PF3D7_1122400   | conserved Plasmodium protein, unknown function                                  | -0.73 | 27.25   | 18.59   |
| PF3D7_1122500   | conserved Plasmodium protein, unknown function                                  | -0.23 | 5.78    | 5.56    |
| PF3D7_1122600   | conserved Plasmodium protein, unknown function                                  | 0.57  | 1.78    | 2.98    |
| PF3D7_1122700   | conserved Plasmodium protein, unknown function                                  | -0.22 | 18.36   | 17.76   |
| PF3D7_1122800   | calcium-dependent protein kinase 6 (CDPK6)                                      | 0.26  | 43.21   | 58.47   |
| PF3D7_1122900   | dynein heavy chain, putative                                                    | 1.81  | 0.17    | 0.67    |
| PF3D7_1123000   | conserved Plasmodium protein, unknown function                                  | -0.78 | 83.58   | 55.09   |
| PF3D7_1123100   | calcium-dependent protein kinase 7 (CDPK7)                                      | -0.20 | 121.75  | 119.78  |
| PF3D7_1123200   | leucine-rich repeat protein (LRR11)                                             | 0.30  | 14.75   | 20.48   |
| PF3D7_1123300   | RING zinc finger protein, putative                                              | -0.72 | 43.97   | 30.21   |
| PF3D7_1123400   | translation elongation factor EF-1, subunit alpha, putative                     | -0.97 | 301.64  | 173.78  |
| PF3D7_1123500   | conserved Plasmodium protein, unknown function                                  | -2.13 | 166.30  | 43.04   |
| PF3D7_1123600   | RAP protein, putative                                                           | -0.27 | 31.70   | 29.71   |
| PF3D7_1123700   | mitochondrial ribosomal protein L37, putative                                   | 1.19  | 6.33    | 16.39   |
| PF3D7_1123800   | conserved Plasmodium protein, unknown function                                  | 0.56  | 7.11    | 11.84   |
| PF3D7_1123900   | splicing factor, putative                                                       | -0.91 | 306.44  | 184.49  |
| PF3D7_1124000   | endoplasmic reticulum oxidoreductin, putative (ERO1)                            | -1.42 | 56.27   | 23.77   |
| PF3D7_1124100   | neutral-sphingomyelinase activation factor protein, putative                    | -1.44 | 66.45   | 27.70   |
| PF3D7_1124200   | conserved Plasmodium protein, unknown function                                  | 0.27  | 20.75   | 28.34   |
| PF3D7_1124300   | conserved Plasmodium protein, unknown function                                  | -0.62 | 102.66  | 75.38   |
| PF3D7_1124400   | U6 snRNA-associated Sm-like protein LSM1, putative (LSM1)                       | -1.70 | 53.43   | 18.57   |
| PF3D7_1124500   | pyruvate dehydrogenase E1 component subunit alpha (pdhA)                        | 0.01  | 10.91   | 12.43   |
| PF3D7_1124600   | ethanolamine kinase (EK)                                                        | 1.13  | 96.62   | 238.34  |
| PF3D7_1124700   | GrpE protein homolog, mitochondrial, putative (MGE1)                            | -0.54 | 39.41   | 30.59   |
| PF3D7_1124800   | nuclear preribosomal assembly protein, putative                                 | -0.74 | 170.19  | 115.29  |
| PF3D7_1124900   | 60S ribosomal protein L35, putative                                             | -1.03 | 274.77  | 152.34  |
| PF3D7_1125000   | conserved Plasmodium protein, unknown function                                  | 0.62  | 17.52   | 30.36   |
| PF3D7_1125100   | vacuolar membrane protein-related, putative                                     | 0.66  | 7.72    | 13.79   |
| PF3D7_1125200   | conserved Plasmodium protein, unknown function                                  | -1.26 | 28.30   | 13.37   |
| PF3D7_1125300   | DNA-directed RNA polymerase (mRNAP)                                             | -0.31 | 12.20   | 11.09   |
| PF3D7_1125400   | mitochondrial import inner membrane translocase subunit TIM44, putative (TIM44) | -0.92 | 53.61   | 31.93   |
| PF3D7_1125500   | small nuclear ribonucleoprotein Sm D1, putative (SNRPD1)                        | -1.62 | 208.53  | 76.84   |
| PF3D7_1125600   | conserved Plasmodium protein, unknown function                                  | 1.32  | 10.58   | 29.93   |
| PF3D7_1125700   | kelch protein, putative                                                         | 3.21  | 20.57   | 214.68  |
| PF3D7_1125800   | kelch protein, putative                                                         | 4.08  | 26.66   | 509.38  |
| PF3D7_1125900   | conserved Plasmodium protein, unknown function                                  | 0.37  | 84.28   | 123.16  |
| PF3D7_1126000   | threonine--tRNA ligase (ThrRS)                                                  | -1.23 | 202.93  | 97.87   |
| PF3D7_1126100   | autophagy-related protein 7, putative (ATG7)                                    | 0.26  | 4.17    | 5.66    |
| PF3D7_1126200   | 40S ribosomal protein S18, putative                                             | -0.61 | 899.36  | 664.37  |
| PF3D7_1126300   | DnaJ protein, putative                                                          | -0.80 | 38.76   | 25.20   |
| PF3D7_1126400   | large ribosomal subunit processing factor, putative                             | -2.57 | 46.07   | 8.75    |
| PF3D7_1126500   | conserved Plasmodium protein, unknown function                                  | -1.76 | 81.26   | 27.10   |

|                 |                                                             |       |         |         |
|-----------------|-------------------------------------------------------------|-------|---------|---------|
| PF3D7_1126600   | steryl ester hydrolase, putative                            | 1.21  | 11.15   | 29.09   |
| PF3D7_1126700   | autophagy-related protein 23, putative (ATG23)              | 2.23  | 61.09   | 324.41  |
| PF3D7_1126800   | RNA-binding protein, putative                               | 0.10  | 2.72    | 3.30    |
| PF3D7_1126900   | small nuclear ribonucleoprotein F, putative (SNRPF)         | -0.51 | 51.15   | 40.70   |
| PF3D7_1127000   | protein phosphatase, putative                               | -1.24 | 46.02   | 21.97   |
| PF3D7_1127100   | deoxyuridine 5'-triphosphate nucleotidohydrolase (dUTPase)  | 0.88  | 31.93   | 66.20   |
| PF3D7_1127200   | conserved Plasmodium protein, unknown function              | 0.21  | 0.11    | 0.19    |
| PF3D7_1127300   | methyltransferase, putative                                 | -1.95 | 43.61   | 12.73   |
| PF3D7_1127400   | conserved Plasmodium protein, unknown function              | -1.14 | 9.80    | 4.99    |
| PF3D7_1127500   | protein disulfide isomerase, putative                       | 0.37  | 14.60   | 21.37   |
| PF3D7_1127600   | CRAL/TRIO domain-containing protein, putative               | 1.69  | 39.59   | 144.33  |
| PF3D7_1127700   | conserved Plasmodium protein, unknown function              | -1.11 | 1.15    | 0.59    |
| PF3D7_1127800   | conserved Plasmodium protein, unknown function              | -0.44 | 17.11   | 14.22   |
| PF3D7_1127900   | conserved Plasmodium protein, unknown function              | 2.02  | 26.62   | 121.82  |
| PF3D7_1128000.1 | conserved Plasmodium protein, unknown function              | -1.12 | 104.65  | 54.53   |
| PF3D7_1128000.2 | conserved Plasmodium protein, unknown function              | -1.11 | 103.47  | 54.31   |
| PF3D7_1128100   | cochaperone prefoldin complex subunit, putative             | -0.23 | 83.93   | 80.94   |
| PF3D7_1128200   | multiprotein bridging factor type 1, putative (MBF1)        | -0.47 | 99.46   | 81.19   |
| PF3D7_1128300   | 6-phosphofruktokinase (PFK11)                               | 0.99  | 0.84    | 1.88    |
| PF3D7_1128400   | geranylgeranyl pyrophosphate synthase, putative (GGPPS)     | -0.15 | 36.12   | 36.83   |
| PF3D7_1128500   | conserved protein, unknown function                         | -1.90 | 27.95   | 8.46    |
| PF3D7_1128600   | CCR4-NOT transcription complex subunit 2, putative (NOT2)   | 1.87  | 1.33    | 5.55    |
| PF3D7_1128700   | GPI-anchor transamidase (GPI8)                              | -0.17 | 9.99    | 10.01   |
| PF3D7_1128900   | conserved Plasmodium protein, unknown function              | 0.40  | 43.65   | 64.86   |
| PF3D7_1129000   | spermidine synthase (SpdSyn)                                | -0.80 | 132.75  | 85.89   |
| PF3D7_1129100   | parasitophorous vacuolar protein 1 (PV1)                    | 0.38  | 745.90  | 1096.18 |
| PF3D7_1129200   | 26S proteasome regulatory subunit RPN7, putative (RPN7)     | -0.25 | 156.76  | 148.98  |
| PF3D7_1129300   | conserved Plasmodium protein, unknown function              | 0.56  | 11.89   | 19.75   |
| PF3D7_1129400   | RNA methyltransferase, putative                             | -1.20 | 104.92  | 51.70   |
| PF3D7_1129500   | A/G-specific adenine glycosylase, putative                  | 0.44  | 7.31    | 11.20   |
| PF3D7_1129600   | phosphatidylinositol-4-phosphate 5-kinase, putative         | 1.49  | 2.01    | 6.39    |
| PF3D7_1129700   | conserved Plasmodium protein, unknown function              | -1.01 | 16.79   | 9.40    |
| PF3D7_1129800   | conserved Plasmodium protein, unknown function              | -0.77 | 12.24   | 8.10    |
| PF3D7_1129900   | transporter, putative                                       | -1.07 | 42.77   | 23.02   |
| PF3D7_1130000   | phosphoacetylglucosamine mutase, putative (PAGM)            | -0.95 | 18.67   | 10.91   |
| PF3D7_1130100   | 60S ribosomal protein L38 (RPL38)                           | -1.32 | 677.17  | 306.46  |
| PF3D7_1130200   | 60S ribosomal protein P0 (PP0)                              | -1.02 | 1947.66 | 1084.25 |
| PF3D7_1130300   | small nucleolar RNA snoR13                                  | -2.54 | 42.78   | 8.19    |
| PF3D7_1130310   | small nucleolar RNA snoR14a                                 | -2.09 | 7.61    | 1.89    |
| PF3D7_1130400   | 26S protease regulatory subunit 6A, putative (RPT5)         | -0.24 | 173.95  | 165.90  |
| PF3D7_1130500   | conserved Plasmodium protein, unknown function              | 0.40  | 8.50    | 12.71   |
| PF3D7_1130600   | conserved Plasmodium protein, unknown function              | -1.16 | 30.61   | 15.43   |
| PF3D7_1130700   | structural maintenance of chromosome protein, putative      | 0.81  | 10.04   | 19.94   |
| PF3D7_1130800   | armadillo repeat protein PF16, putative                     | 0.45  | 1.63    | 2.52    |
| PF3D7_1130900   | conserved Plasmodium protein, unknown function              | 0.76  | 0.83    | 1.59    |
| PF3D7_1131000   | RNA-binding protein s1, putative                            | 0.94  | 8.03    | 17.51   |
| PF3D7_1131100   | serpentine receptor, putative (SR1)                         | -0.05 | 18.47   | 20.09   |
| PF3D7_1131200   | conserved Plasmodium protein, unknown function              | 0.73  | 7.56    | 14.24   |
| PF3D7_1131300   | conserved Plasmodium protein, unknown function              | 0.93  | 0.62    | 1.35    |
| PF3D7_1131400   | conserved Plasmodium protein, unknown function              | 0.61  | 0.75    | 1.30    |
| PF3D7_1131500   | conserved Plasmodium protein, unknown function              | 0.44  | 2.24    | 3.44    |
| PF3D7_1131600   | conserved Plasmodium protein, unknown function              | 1.12  | 0.36    | 0.89    |
| PF3D7_1131700   | conserved Plasmodium protein, unknown function              | 1.31  | 1.42    | 4.08    |
| PF3D7_1131800   | oxysterol-binding protein-related protein 2                 | 1.91  | 16.26   | 68.85   |
| PF3D7_1131900   | conserved Plasmodium protein, unknown function              | 1.21  | 0.48    | 1.27    |
| PF3D7_1132000   | ubiquitin-like protein, putative                            | -0.47 | 59.42   | 48.47   |
| PF3D7_1132100   | conserved Plasmodium protein, unknown function              | 0.54  | 0.57    | 0.94    |
| PF3D7_1132200   | T-complex protein 1 subunit alpha (TCP1)                    | -0.54 | 290.18  | 225.28  |
| PF3D7_1132300   | nucleic acid binding protein, putative                      | 0.13  | 41.23   | 51.05   |
| PF3D7_1132400   | conserved Plasmodium membrane protein, unknown function     | 0.02  | 15.14   | 17.31   |
| PF3D7_1132500   | amino acid transporter, putative                            | 1.38  | 0.26    | 0.77    |
| PF3D7_1132600   | pre-mRNA-splicing factor 38A, putative (PRP38A)             | -1.33 | 73.72   | 33.09   |
| PF3D7_1132700   | mitochondrial ribosomal protein L2 precursor                | -0.38 | 19.38   | 16.77   |
| PF3D7_1132800   | aquaglyceroporin (AQP)                                      | 0.08  | 121.17  | 144.48  |
| PF3D7_1132900   | glycine cleavage system H protein (GCVH)                    | 0.48  | 6.28    | 9.89    |
| PF3D7_1133000   | conserved Plasmodium protein, unknown function              | -0.20 | 33.85   | 33.35   |
| PF3D7_1133100   | conserved membrane protein, unknown function                | -0.70 | 105.80  | 73.61   |
| PF3D7_1133200   | conserved Plasmodium protein, unknown function              | 1.14  | 32.19   | 80.38   |
| PF3D7_1133300   | LEM3/CDC50 family protein, putative                         | 0.07  | 19.29   | 22.89   |
| PF3D7_1133400   | apical membrane antigen 1 (AMA1)                            | 4.20  | 34.71   | 723.12  |
| PF3D7_1133500   | conserved Plasmodium protein, unknown function              | 1.61  | 1.56    | 5.41    |
| PF3D7_1133600   | conserved Plasmodium protein, unknown function              | -1.32 | 4.17    | 1.89    |
| PF3D7_1133700   | conserved Plasmodium protein, unknown function              | -1.32 | 997.10  | 451.96  |
| PF3D7_1133800   | RNA (uracil-5-)-methyltransferase, putative                 | -0.37 | 51.20   | 44.64   |
| PF3D7_1133900   | conserved Plasmodium protein, unknown function              | -1.15 | 74.04   | 37.59   |
| PF3D7_1134000   | heat shock protein 70 (HSP70-3)                             | 0.10  | 220.01  | 266.53  |
| PF3D7_1134100   | protein disulfide isomerase (PDI-11)                        | -0.28 | 56.60   | 52.65   |
| PF3D7_1134200   | conserved Plasmodium protein, unknown function              | -1.69 | 43.58   | 15.30   |
| PF3D7_1134300   | conserved Plasmodium protein, unknown function              | 0.73  | 14.55   | 27.28   |
| PF3D7_1134400   | conserved Plasmodium protein, unknown function              | 0.77  | 5.03    | 9.73    |
| PF3D7_1134500   | alpha/beta hydrolase, putative                              | -1.59 | 31.17   | 11.69   |
| PF3D7_1134600   | zinc finger protein, putative                               | 0.71  | 4.36    | 8.04    |
| PF3D7_1134700   | DNA-directed RNA polymerase I subunit RPA2, putative (RPA2) | -1.43 | 117.33  | 49.04   |
| PF3D7_1134800   | coatamer subunit delta                                      | -1.44 | 99.91   | 41.63   |
| PF3D7_1134900   | conserved Plasmodium protein, unknown function              | 0.04  | 1.99    | 2.32    |
| PF3D7_1135000.1 | conserved Plasmodium protein, unknown function              | 0.64  | 3.25    | 5.75    |
| PF3D7_1135000.2 | conserved Plasmodium protein, unknown function              | 0.51  | 3.51    | 5.67    |
| PF3D7_1135000.3 | conserved Plasmodium protein, unknown function              | 0.58  | 3.44    | 5.88    |
| PF3D7_1135100   | protein phosphatase PPM8, putative (PPM8)                   | -1.72 | 121.24  | 41.57   |
| PF3D7_1135200   | regulator of chromosome condensation, putative, pseudogene  | -0.93 | 1.46    | 0.86    |
| PF3D7_1135300   | conserved Plasmodium membrane protein, unknown function     | -2.06 | 13.80   | 3.74    |
| PF3D7_1135400   | conserved Plasmodium protein, unknown function              | -1.71 | 121.47  | 41.97   |
| PF3D7_1135500   | conserved Plasmodium protein, unknown function              | 0.23  | 1.66    | 2.20    |
| PF3D7_1135600   | conserved Plasmodium protein, unknown function              | 1.00  | 1.32    | 2.99    |
| PF3D7_1135700   | conserved Plasmodium protein, unknown function              | -1.20 | 47.89   | 23.48   |
| PF3D7_1135800   | conserved Plasmodium protein, unknown function              | -1.56 | 25.06   | 9.58    |
| PF3D7_1135900   | 3-oxo-5-alpha-steroid 4-dehydrogenase, putative             | -0.31 | 119.11  | 108.70  |
| PF3D7_1136000   | conserved Plasmodium protein, unknown function              | 0.27  | 7.13    | 9.70    |

|                 |                                                                                 |       |        |        |
|-----------------|---------------------------------------------------------------------------------|-------|--------|--------|
| PF3D7_1136100   | conserved Plasmodium protein, unknown function                                  | 1.03  | 0.52   | 1.22   |
| PF3D7_1136200   | conserved Plasmodium protein, unknown function                                  | 0.43  | 38.73  | 59.01  |
| PF3D7_1136300   | tudor staphylococcal nuclease (TSN)                                             | -1.26 | 181.44 | 85.28  |
| PF3D7_1136400   | signal recognition particle subunit SRP72, putative (SRP72)                     | -1.25 | 83.17  | 39.54  |
| PF3D7_1136500.1 | casein kinase 1 (CK1)                                                           | 0.45  | 441.77 | 683.51 |
| PF3D7_1136500.2 | casein kinase 1 (CK1)                                                           | 0.44  | 437.70 | 669.79 |
| PF3D7_1136600   | conserved Plasmodium protein, unknown function                                  | -0.84 | 139.70 | 88.42  |
| PF3D7_1136700.1 | conserved Plasmodium protein, unknown function                                  | 1.44  | 17.71  | 54.38  |
| PF3D7_1136700.2 | conserved Plasmodium protein, unknown function                                  | 1.43  | 17.38  | 53.01  |
| PF3D7_1136800   | DnaJ protein, putative                                                          | -1.34 | 74.89  | 33.40  |
| PF3D7_1136900   | subtilisin-like protease 2 (SUB2)                                               | 3.45  | 11.06  | 136.53 |
| PF3D7_1137000   | U2 spliceosomal RNA                                                             | 3.19  | 11.09  | 115.47 |
| PF3D7_1137100   | mitochondrial ribosomal protein S9 precursor, putative                          | -0.65 | 52.56  | 37.73  |
| PF3D7_1137200   | conserved Plasmodium protein, unknown function                                  | 0.57  | 13.12  | 21.99  |
| PF3D7_1137300   | conserved Plasmodium membrane protein, unknown function                         | -0.93 | 119.41 | 70.80  |
| PF3D7_1137400   | UVB-resistance protein UVR8 homologue                                           | 0.15  | 13.67  | 17.17  |
| PF3D7_1137500   | apicoplast ribosomal protein S14p/S29e precursor, putative                      | 0.42  | 29.95  | 45.14  |
| PF3D7_1137600   | conserved Plasmodium protein, unknown function                                  | 0.52  | 0.23   | 0.38   |
| PF3D7_1137700   | calcium-binding protein, putative                                               | 0.84  | 0.47   | 0.95   |
| PF3D7_1137800   | conserved Plasmodium protein, unknown function                                  | 1.23  | 6.93   | 18.42  |
| PF3D7_1137900   | conserved Plasmodium protein, unknown function                                  | 0.57  | 0.13   | 0.22   |
| PF3D7_1138000   | conserved Plasmodium protein, unknown function                                  | 0.15  | 14.01  | 17.58  |
| PF3D7_1138100   | ubiquitin-related modifier 1, putative (URM1)                                   | -2.09 | 36.33  | 9.62   |
| PF3D7_1138200   | conserved Plasmodium membrane protein, unknown function                         | 0.63  | 6.47   | 11.33  |
| PF3D7_1138300   | conserved Plasmodium membrane protein, unknown function                         | 0.31  | 3.55   | 5.02   |
| PF3D7_1138400   | guanylyl cyclase (GCalpha)                                                      | 0.31  | 9.76   | 13.70  |
| PF3D7_1138500   | protein phosphatase 2C (PPM2)                                                   | -1.10 | 293.27 | 154.37 |
| PF3D7_1138600   | beta-catenin-like protein 1, putative                                           | -1.49 | 30.86  | 12.37  |
| PF3D7_1138700   | conserved Plasmodium protein, unknown function                                  | 0.00  | 47.26  | 53.28  |
| PF3D7_1138800   | WD repeat-containing protein, putative                                          | -1.09 | 75.49  | 40.14  |
| PF3D7_1138900   | unspecified product                                                             | -1.51 | 0.53   | 0.21   |
| PF3D7_1139000   | unspecified product                                                             | -2.44 | 9.87   | 2.04   |
| PF3D7_1139100   | RNA-binding protein, putative                                                   | -1.71 | 98.14  | 33.79  |
| PF3D7_1139200   | conserved Plasmodium protein, unknown function                                  | -1.33 | 15.22  | 6.84   |
| PF3D7_1139300   | transcription factor with AP2 domain(s) (ApiAP2)                                | -1.76 | 113.49 | 37.89  |
| PF3D7_1139400   | unspecified product                                                             | -5.08 | 1.13   | 0.03   |
| PF3D7_1139500.1 | AAA family ATPase, putative                                                     | 1.95  | 0.09   | 0.44   |
| PF3D7_1139500.2 | AAA family ATPase, putative                                                     | 0.62  | 0.07   | 0.14   |
| PF3D7_1139600   | conserved Plasmodium protein, unknown function                                  | -0.45 | 1.11   | 0.92   |
| PF3D7_1139700   | adrenodoxin reductase, putative                                                 | 2.58  | 6.51   | 44.07  |
| PF3D7_1139800   | conserved Plasmodium protein, unknown function                                  | -1.36 | 14.50  | 6.36   |
| PF3D7_1139900   | conserved protein, unknown function                                             | -2.04 | 53.73  | 14.69  |
| PF3D7_1140000   | carbonic anhydrase (CA)                                                         | 0.93  | 2.11   | 4.56   |
| PF3D7_1140100   | V-type proton ATPase subunit F, putative                                        | -0.92 | 73.22  | 43.71  |
| PF3D7_1140200   | conserved Plasmodium protein, unknown function                                  | 1.61  | 29.13  | 100.27 |
| PF3D7_1140300   | P-loop containing nucleoside triphosphate hydrolase, putative                   | -0.04 | 1.49   | 1.63   |
| PF3D7_1140400   | conserved Plasmodium protein, unknown function                                  | 0.59  | 111.47 | 189.64 |
| PF3D7_1140500   | myosin F, putative (MyoF)                                                       | 0.97  | 1.41   | 3.13   |
| PF3D7_1140600   | conserved Plasmodium protein, unknown function                                  | -0.04 | 6.92   | 7.60   |
| PF3D7_1140700   | conserved Plasmodium protein, unknown function                                  | -1.01 | 75.73  | 42.42  |
| PF3D7_1140800   | conserved Plasmodium protein, unknown function                                  | -1.37 | 61.01  | 26.57  |
| PF3D7_1140900   | conserved Plasmodium protein, unknown function                                  | 0.00  | 1.98   | 2.24   |
| PF3D7_1141000   | conserved Plasmodium protein, unknown function                                  | 0.52  | 0.39   | 0.64   |
| PF3D7_1141100   | conserved Plasmodium protein, unknown function                                  | -1.44 | 1.56   | 0.65   |
| PF3D7_1141200   | conserved Plasmodium protein, unknown function                                  | 1.26  | 4.07   | 11.14  |
| PF3D7_1141300   | conserved Plasmodium protein, unknown function                                  | 0.66  | 15.55  | 27.79  |
| PF3D7_1141400   | phosphatidylinositol N-acetylglucosaminyltransferase subunit H, putative (PIGH) | 0.19  | 14.83  | 19.10  |
| PF3D7_1141500   | conserved Plasmodium protein, unknown function                                  | 1.16  | 0.22   | 0.60   |
| PF3D7_1141600   | dolichol-phosphate mannosyltransferase (DPM1)                                   | -0.14 | 6.81   | 7.00   |
| PF3D7_1141700   | conserved Plasmodium protein, unknown function                                  | -0.31 | 17.38  | 15.89  |
| PF3D7_1141800   | phd finger protein, putative                                                    | -0.23 | 27.64  | 26.68  |
| PF3D7_1141900   | inner membrane complex protein 1b, putative (IMC1b)                             | 2.45  | 0.30   | 1.90   |
| PF3D7_1142000   | conserved Plasmodium protein, unknown function                                  | 1.37  | 0.70   | 2.06   |
| PF3D7_1142100   | conserved Plasmodium protein, unknown function                                  | -0.95 | 125.47 | 73.24  |
| PF3D7_1142200   | conserved Plasmodium protein, unknown function                                  | 0.51  | 1.78   | 2.88   |
| PF3D7_1142300   | conserved Plasmodium membrane protein, unknown function                         | 0.78  | 18.84  | 36.60  |
| PF3D7_1142400   | coproporphyrinogen-III oxidase (CPO)                                            | -1.62 | 102.69 | 37.63  |
| PF3D7_1142500   | 60S ribosomal protein L28 (RPL28)                                               | -1.05 | 232.11 | 126.59 |
| PF3D7_1142600   | 60S ribosomal protein L35ae, putative                                           | -0.82 | 931.68 | 597.93 |
| PF3D7_1142700   | methyltransferase, putative                                                     | -2.22 | 76.56  | 18.51  |
| PF3D7_1142800   | conserved Plasmodium protein, unknown function                                  | -0.48 | 11.45  | 9.29   |
| PF3D7_1142900   | conserved Plasmodium protein, unknown function                                  | 0.06  | 3.75   | 4.42   |
| PF3D7_1143000   | alpha/beta hydrolase, putative                                                  | 0.55  | 5.07   | 8.38   |
| PF3D7_1143100   | transcription factor with AP2 domain(s) (AP2-O)                                 | 3.26  | 21.19  | 228.61 |
| PF3D7_1143200   | DnaJ protein, putative                                                          | 0.28  | 32.21  | 44.27  |
| PF3D7_1143300   | DNA-directed RNA polymerase I, putative                                         | -0.77 | 128.81 | 85.10  |
| PF3D7_1143400   | translation initiation factor eIF-1A, putative                                  | -0.17 | 251.66 | 252.79 |
| PF3D7_1143500   | conserved Plasmodium protein, unknown function                                  | 0.30  | 4.20   | 5.83   |
| PF3D7_1143600   | conserved Plasmodium protein, unknown function                                  | 0.86  | 1.90   | 3.92   |
| PF3D7_1143700   | conserved Plasmodium protein, unknown function                                  | 0.33  | 1.34   | 1.91   |
| PF3D7_1143800   | conserved Plasmodium protein, unknown function                                  | -0.18 | 105.50 | 105.17 |
| PF3D7_1143900   | carbohydrate kinase, putative                                                   | -1.20 | 12.80  | 6.28   |
| PF3D7_1144000   | 40S ribosomal protein S21 (RPS21)                                               | -0.50 | 404.63 | 323.27 |
| PF3D7_1144100   | mitochondrial large subunit ribosomal protein, putative                         | 0.11  | 8.13   | 9.90   |
| PF3D7_1144200   | conserved Plasmodium protein, unknown function                                  | -0.93 | 9.92   | 5.87   |
| PF3D7_1144300   | 60S ribosomal protein L41 (RPL41)                                               | -1.29 | 106.03 | 48.89  |
| PF3D7_1144400   | conserved Plasmodium protein, unknown function                                  | -0.33 | 2.10   | 1.89   |
| PF3D7_1144500   | ubiquitin activating enzyme (E1) subunit Aosl, putative (AOS1)                  | -1.35 | 21.92  | 9.72   |
| PF3D7_1144600   | transcription initiation factor IIF subunit beta, putative (TFG2)               | -1.10 | 78.47  | 41.21  |
| PF3D7_1144700   | apicoplast import protein Tic20, putative (TIC20)                               | 0.49  | 11.23  | 17.84  |
| PF3D7_1144800   | conserved Plasmodium protein, unknown function                                  | -0.38 | 3.48   | 3.02   |
| PF3D7_1144900   | ras-related protein Rab-6 (RAB6)                                                | -0.58 | 139.24 | 105.23 |
| PF3D7_1145000   | conserved Plasmodium protein, unknown function                                  | 1.20  | 5.27   | 13.74  |
| PF3D7_1145100   | coatomer subunit gamma, putative (SEC21)                                        | -1.96 | 77.69  | 22.49  |
| PF3D7_1145200   | serine/threonine protein kinase, putative                                       | 0.91  | 79.34  | 168.57 |
| PF3D7_1145300   | cysteine-rich PDZ-binding protein, putative (CRIPT)                             | 0.23  | 9.50   | 12.62  |
| PF3D7_1145400   | dynamitin-like protein (DYN1)                                                   | -0.77 | 110.10 | 73.04  |
| PF3D7_1145500   | ABC transporter B family member 3, putative (ABCB3)                             | 0.34  | 2.80   | 4.00   |

|                 |                                                                 |       |         |         |
|-----------------|-----------------------------------------------------------------|-------|---------|---------|
| PF3D7_1145600   | conserved protein, unknown function                             | 0.62  | 3.63    | 6.30    |
| PF3D7_1145700   | bicoid-interacting protein BIN3, putative                       | -0.31 | 3.01    | 2.73    |
| PF3D7_1145800   | conserved Plasmodium protein, unknown function                  | -1.59 | 27.28   | 10.26   |
| PF3D7_1145900   | conserved Plasmodium protein, unknown function                  | 0.57  | 4.48    | 7.55    |
| PF3D7_1146000   | ribosome assembly protein 4, putative (RSA4)                    | -0.86 | 72.06   | 44.81   |
| PF3D7_1146100   | conserved Plasmodium protein, unknown function                  | 0.89  | 3.05    | 6.42    |
| PF3D7_1146200   | conserved Plasmodium protein, unknown function                  | 0.67  | 5.58    | 10.10   |
| PF3D7_1146300   | conserved Plasmodium protein, unknown function                  | 1.36  | 0.52    | 1.56    |
| PF3D7_1146500   | leucine-rich repeat protein (LRR10)                             | 1.56  | 0.23    | 0.84    |
| PF3D7_1146600   | CCAAT-box DNA binding protein subunit B (NFYB)                  | 1.12  | 36.25   | 89.14   |
| PF3D7_1146700   | kinesin-like protein, putative                                  | 0.79  | 0.18    | 0.36    |
| PF3D7_1146800   | conserved Plasmodium protein, unknown function                  | 2.28  | 0.83    | 4.57    |
| PF3D7_1146900   | protein YIPF6, putative                                         | -1.03 | 7.43    | 4.09    |
| PF3D7_1147000   | sporozoite asparagine-rich protein (SLARP)                      | 0.54  | 0.28    | 0.46    |
| PF3D7_1147100   | dynein light chain, putative                                    | -0.38 | 0.00    | 0.00    |
| PF3D7_1147200   | tubulin--tyrosine ligase, putative                              | 1.50  | 1.33    | 4.26    |
| PF3D7_1147300   | conserved Plasmodium protein, unknown function                  | 0.77  | 20.27   | 38.96   |
| PF3D7_1147400   | conserved Plasmodium protein, unknown function                  | 0.81  | 13.11   | 25.99   |
| PF3D7_1147500   | farnesyltransferase beta subunit, putative                      | -1.68 | 9.54    | 3.36    |
| PF3D7_1147600   | conserved Plasmodium protein, unknown function                  | -1.07 | 5.72    | 3.08    |
| PF3D7_1147700   | mitochondrial ATP synthase delta subunit, putative              | 1.19  | 16.52   | 42.67   |
| PF3D7_1147800.1 | merozoite adhesive erythrocytic binding protein (MAEBL)         | -0.29 | 5.11    | 4.74    |
| PF3D7_1147800.2 | merozoite adhesive erythrocytic binding protein (MAEBL)         | -0.27 | 5.15    | 4.84    |
| PF3D7_1147900   | conserved Plasmodium protein, unknown function                  | -1.21 | 101.45  | 49.44   |
| PF3D7_1148000   | serine/threonine protein kinase, putative                       | 1.30  | 6.78    | 18.91   |
| PF3D7_1148100   | unspecified product                                             | -1.21 | 0.85    | 0.41    |
| PF3D7_1148200   | unspecified product                                             | 1.25  | 78.40   | 210.42  |
| PF3D7_1148500   | unspecified product                                             | -0.64 | 0.41    | 0.29    |
| PF3D7_1148600   | 18S ribosomal RNA                                               | 0.62  | 9.36    | 16.26   |
| PF3D7_1148700   | Plasmodium exported protein (PHISTc), unknown function (GEXP12) | -1.81 | 944.99  | 304.11  |
| PF3D7_1148800   | Plasmodium exported protein (hyp11), unknown function           | -1.81 | 138.34  | 44.50   |
| PF3D7_1148900   | Plasmodium exported protein, unknown function                   | -2.89 | 1066.31 | 162.13  |
| PF3D7_1149000   | antigen 332, DBL-like protein (Pf332)                           | 1.71  | 22.02   | 81.44   |
| PF3D7_1149100.1 | Plasmodium exported protein, unknown function                   | 0.54  | 200.16  | 328.59  |
| PF3D7_1149100.2 | Plasmodium exported protein, unknown function                   | 0.54  | 200.50  | 328.72  |
| PF3D7_1149200   | ring-infected erythrocyte surface antigen                       | 1.72  | 529.00  | 1966.23 |
| PF3D7_1149300   | serine/threonine protein kinase, FIKK family (FIKK11)           | 0.59  | 11.53   | 19.62   |
| PF3D7_1149400   | Plasmodium exported protein, unknown function                   | 1.43  | 9.46    | 28.77   |
| PF3D7_1149500   | ring-infected erythrocyte surface antigen 2, pseudogene (RESA2) | -2.41 | 21.68   | 4.59    |
| PF3D7_1149600   | DnaJ protein, putative                                          | 0.04  | 159.57  | 185.68  |
| PF3D7_1149700   | Plasmodium exported protein (PHISTa), unknown function          | 0.36  | 1.22    | 1.81    |
| PF3D7_1149800   | rifin (RIF)                                                     | -1.02 | 1.49    | 0.82    |
| PF3D7_1149900   | stevor                                                          | 0.62  | 0.29    | 0.53    |
| PF3D7_1150000   | rifin (RIF)                                                     | 3.32  | 0.00    | 0.21    |
| PF3D7_1150100   | rifin, pseudogene (RIF)                                         | 0.36  | 0.05    | 0.09    |
| PF3D7_1150200   | rifin (RIF)                                                     | -2.70 | 0.09    | 0.00    |
| PF3D7_1150300   | rifin (RIF)                                                     | 0.52  | 0.13    | 0.23    |
| PF3D7_1150400   | erythrocyte membrane protein 1, PfEMP1 (VAR)                    | 0.28  | 0.84    | 1.15    |
| PF3D7_1200100   | erythrocyte membrane protein 1, PfEMP1 (VAR)                    | 1.82  | 12.15   | 48.36   |
| PF3D7_1200200   | rifin (RIF)                                                     | -0.56 | 5.48    | 4.20    |
| PF3D7_1200300   | rifin (RIF)                                                     | 0.46  | 0.50    | 0.79    |
| PF3D7_1200400   | erythrocyte membrane protein 1, PfEMP1 (VAR)                    | -0.67 | 1.37    | 0.97    |
| PF3D7_1200500   | rifin (RIF)                                                     | 1.63  | 3.41    | 11.94   |
| PF3D7_1200600   | erythrocyte membrane protein 1, PfEMP1 (VAR2CSA)                | 1.82  | 29.78   | 118.80  |
| PF3D7_1200700   | acyl-CoA synthetase (ACS7)                                      | -1.49 | 1610.44 | 647.04  |
| PF3D7_1200800   | serine/threonine protein kinase, FIKK family (FIKK12)           | -1.55 | 100.81  | 38.87   |
| PF3D7_1200900   | Plasmodium exported protein (PHISTc), unknown function          | -1.95 | 124.25  | 36.34   |
| PF3D7_1201000   | Plasmodium exported protein (PHISTb), unknown function          | 2.16  | 40.81   | 205.82  |
| PF3D7_1201100   | RESA-like protein with PHIST and DnaJ domains                   | 0.64  | 6.98    | 12.30   |
| PF3D7_1201200   | Plasmodium exported protein (PHISTa-like), unknown function     | -0.58 | 571.29  | 432.59  |
| PF3D7_1201300   | liver stage associated protein 1 (LSAP1)                        | 1.23  | 1.67    | 4.55    |
| PF3D7_1201400   | Plasmodium exported protein, unknown function                   | -0.24 | 6.85    | 6.57    |
| PF3D7_1201500   | XPA binding protein 1, putative                                 | -1.50 | 110.86  | 44.17   |
| PF3D7_1201600   | NIMA related kinase 3 (NEK3)                                    | -0.34 | 5.34    | 4.76    |
| PF3D7_1201700   | conserved Plasmodium membrane protein, unknown function         | 0.19  | 0.84    | 1.10    |
| PF3D7_1201800   | cytochrome c oxidase assembly protein COX19, putative (COX19)   | -0.20 | 7.02    | 6.91    |
| PF3D7_1201900   | conserved protein, unknown function                             | 0.03  | 47.46   | 54.69   |
| PF3D7_1202000   | ATP-dependent RNA helicase, putative                            | -1.79 | 15.50   | 5.07    |
| PF3D7_1202100.1 | conserved protein, unknown function                             | 0.99  | 33.97   | 76.22   |
| PF3D7_1202100.2 | conserved protein, unknown function                             | 0.99  | 33.93   | 76.26   |
| PF3D7_1202200   | mitochondrial phosphate carrier protein (MPC)                   | 0.60  | 31.27   | 53.61   |
| PF3D7_1202300   | dynein heavy chain, putative                                    | 0.65  | 1.03    | 1.83    |
| PF3D7_1202400   | peptidyl-prolyl cis-trans isomerase (CYP26)                     | 0.74  | 11.91   | 22.47   |
| PF3D7_1202500   | trimethylguanosine synthase, putative                           | -1.18 | 12.72   | 6.32    |
| PF3D7_1202600   | conserved protein, unknown function                             | 0.01  | 191.17  | 217.83  |
| PF3D7_1202700   | conserved Plasmodium protein, unknown function                  | -1.30 | 61.12   | 28.13   |
| PF3D7_1202800   | conserved Plasmodium protein, unknown function                  | -0.91 | 19.47   | 11.65   |
| PF3D7_1202900   | high mobility group protein B1 (HMGB1)                          | -0.39 | 1064.82 | 916.44  |
| PF3D7_1203000   | origin recognition complex subunit 1 (ORC1)                     | 0.93  | 14.76   | 31.69   |
| PF3D7_1203100   | conserved Plasmodium protein, unknown function                  | -2.02 | 29.78   | 8.28    |
| PF3D7_1203200   | signal recognition particle subunit SRP14 (SRP14)               | -0.80 | 52.62   | 34.03   |
| PF3D7_1203300   | conserved Plasmodium protein, unknown function                  | 0.61  | 4.44    | 7.67    |
| PF3D7_1203400   | transporter, putative                                           | 0.48  | 10.89   | 17.18   |
| PF3D7_1203500   | threonylcarbamoyl-AMP synthase, putative (SUA5)                 | -1.47 | 121.77  | 49.64   |
| PF3D7_1203600   | cytochrome c1 heme lyase, putative                              | 0.26  | 8.03    | 10.89   |
| PF3D7_1203700   | nucleosome assembly protein (NAPL)                              | -0.18 | 1070.25 | 1068.35 |
| PF3D7_1203800   | unspecified product                                             | -1.75 | 0.19    | 0.06    |
| PF3D7_1203900   | ubiquitin-conjugating enzyme E2 (UBC)                           | -0.09 | 210.12  | 223.26  |
| PF3D7_1204000   | conserved Plasmodium protein, unknown function                  | 2.58  | 0.36    | 2.73    |
| PF3D7_1204100   | conserved Plasmodium protein, unknown function                  | 1.08  | 2.38    | 5.70    |
| PF3D7_1204200   | conserved Plasmodium protein, unknown function                  | -0.81 | 7.13    | 4.59    |
| PF3D7_1204300   | eukaryotic translation initiation factor 5A (EIF5A)             | -0.59 | 892.07  | 669.37  |
| PF3D7_1204400   | conserved Plasmodium membrane protein, unknown function         | 1.13  | 0.66    | 1.67    |
| PF3D7_1204500   | conserved Plasmodium protein, unknown function                  | -0.39 | 17.12   | 14.78   |
| PF3D7_1204600   | cytidine deaminase, putative                                    | -1.45 | 39.91   | 16.49   |
| PF3D7_1204700   | conserved Plasmodium protein, unknown function                  | 0.81  | 8.89    | 17.66   |
| PF3D7_1204900   | probable protein, unknown function                              | 3.09  | 9.92    | 96.06   |
| PF3D7_1205000   | conserved Plasmodium protein, unknown function                  | 0.42  | 19.27   | 29.09   |

|                 |                                                                                 |       |         |         |
|-----------------|---------------------------------------------------------------------------------|-------|---------|---------|
| PF3D7_1205100   | O-phosphoseryl-tRNA(Sec) selenium transferase, putative (SEPSECS)               | -0.08 | 18.92   | 20.26   |
| PF3D7_1205200   | HAD domain ookinete protein, putative (HADO)                                    | -0.74 | 3.66    | 2.47    |
| PF3D7_1205300   | conserved Plasmodium protein, unknown function                                  | 0.55  | 4.48    | 7.45    |
| PF3D7_1205400   | conserved Plasmodium protein, unknown function                                  | -0.69 | 17.70   | 12.40   |
| PF3D7_1205500   | zinc finger protein, putative                                                   | -0.18 | 167.46  | 167.02  |
| PF3D7_1205600   | conserved Plasmodium protein, unknown function                                  | 1.11  | 32.46   | 79.11   |
| PF3D7_1205700   | targeted glyoxalase II (tGloII)                                                 | -0.37 | 6.33    | 5.53    |
| PF3D7_1205800   | high mobility group protein B3, putative (HMGB3)                                | -0.33 | 130.94  | 117.86  |
| PF3D7_1205900   | conserved protein, unknown function                                             | -0.61 | 74.33   | 55.00   |
| PF3D7_1206000   | shewanella-like protein phosphatase 2 (SHLP2)                                   | 0.96  | 59.51   | 130.75  |
| PF3D7_1206100   | IMP-specific 5'-nucleotidase, putative                                          | 1.05  | 4.85    | 11.37   |
| PF3D7_1206200   | eukaryotic translation initiation factor 3 subunit C, putative (EIF3C)          | -0.67 | 290.20  | 206.45  |
| PF3D7_1206300   | conserved Plasmodium protein, unknown function                                  | 1.20  | 12.68   | 33.02   |
| PF3D7_1206400   | rhodanese like protein, putative                                                | 0.18  | 1.36    | 1.74    |
| PF3D7_1206500   | Tat binding protein 1 (TBP-1)-interacting protein, putative                     | 1.28  | 1.99    | 5.48    |
| PF3D7_1206600   | DNA-directed RNA polymerase III subunit, putative                               | -1.29 | 131.33  | 60.52   |
| PF3D7_1206700   | eukaryotic translation initiation factor 5, putative                            | -0.39 | 228.80  | 197.53  |
| PF3D7_1206800   | conserved Plasmodium protein, unknown function                                  | -0.60 | 15.09   | 11.26   |
| PF3D7_1206900   | conserved Plasmodium protein, unknown function                                  | 0.56  | 4.31    | 7.19    |
| PF3D7_1207000   | conserved Plasmodium protein, unknown function                                  | 0.82  | 17.80   | 35.46   |
| PF3D7_1207100   | small subunit rRNA processing factor, putative                                  | -0.31 | 138.63  | 125.97  |
| PF3D7_1207200   | conserved Plasmodium protein, unknown function                                  | -0.50 | 2.16    | 1.72    |
| PF3D7_1207300   | conserved Plasmodium protein, unknown function                                  | 1.74  | 0.34    | 1.48    |
| PF3D7_1207400   | conserved Plasmodium protein, unknown function                                  | 2.31  | 1.09    | 6.22    |
| PF3D7_1207500   | RNA-binding protein, putative                                                   | -0.30 | 14.85   | 13.67   |
| PF3D7_1207600   | tRNA delta(2)-isopentenylpyrophosphate transferase, putative (MiaA)             | -0.78 | 32.58   | 21.40   |
| PF3D7_1207700   | blood stage antigen 41-3 precursor                                              | 3.80  | 0.52    | 8.41    |
| PF3D7_1207800   | conserved Plasmodium protein, unknown function                                  | 1.15  | 4.21    | 10.55   |
| PF3D7_1207900   | conserved Plasmodium protein, unknown function                                  | 0.56  | 3.04    | 5.08    |
| PF3D7_1208000   | apicoplast ribosomal protein L29 precursor, putative                            | -1.40 | 3.50    | 1.47    |
| PF3D7_1208100   | conserved Plasmodium protein, unknown function                                  | -1.26 | 23.12   | 10.94   |
| PF3D7_1208200   | cysteine repeat modular protein 3 (CRMP3)                                       | 0.85  | 0.43    | 0.88    |
| PF3D7_1208300   | mitochondrial ACP precursor, putative                                           | 1.01  | 16.82   | 38.24   |
| PF3D7_1208400   | amino acid transporter, putative                                                | 0.08  | 5.34    | 6.39    |
| PF3D7_1208500   | conserved Plasmodium protein, unknown function                                  | -0.20 | 1.37    | 1.34    |
| PF3D7_1208600   | mitochondrial import inner membrane translocase subunit TIM10, putative (TIM10) | 0.03  | 21.91   | 25.22   |
| PF3D7_1208700   | conserved protein, unknown function                                             | 0.30  | 6.06    | 8.43    |
| PF3D7_1208800   | zinc finger protein, putative                                                   | -1.31 | 61.44   | 28.05   |
| PF3D7_1208900   | protein phosphatase, putative                                                   | 0.64  | 68.37   | 120.58  |
| PF3D7_1209000   | conserved Plasmodium protein, unknown function                                  | -0.78 | 37.02   | 24.40   |
| PF3D7_1209100   | conserved Plasmodium protein, unknown function                                  | -0.55 | 2.83    | 2.18    |
| PF3D7_1209200   | U6 snRNA-associated Sm-like protein LSm7, putative (LSM7)                       | -0.82 | 101.79  | 65.21   |
| PF3D7_1209300   | zinc finger transcription factor, putative (KROX1)                              | 2.10  | 33.79   | 163.38  |
| PF3D7_1209400   | cytosolic iron-sulfur protein assembly protein 1, putative (CIA1)               | 3.66  | 12.09   | 172.82  |
| PF3D7_1209500.1 | cGMP-specific phosphodiesterase (PDE1)                                          | 0.97  | 8.72    | 19.25   |
| PF3D7_1209500.2 | cGMP-specific phosphodiesterase (PDE1)                                          | 0.97  | 9.30    | 20.55   |
| PF3D7_1209600   | porphobilinogen deaminase (PBGD)                                                | 1.31  | 5.22    | 14.65   |
| PF3D7_1209700   | conserved Plasmodium protein, unknown function                                  | 0.43  | 6.63    | 10.09   |
| PF3D7_1209800   | ATP synthase mitochondrial F1 complex assembly factor 1, putative (ATP11)       | -0.97 | 4.24    | 2.43    |
| PF3D7_1209900   | ABC transporter B family member 7, putative (ABCB7)                             | 0.31  | 6.11    | 8.55    |
| PF3D7_1210000   | 50S ribosomal protein L1, apicoplast, putative (RPL1)                           | 0.38  | 13.62   | 20.08   |
| PF3D7_1210100   | syntaxin, Qa-SNARE family (SYN2)                                                | 1.27  | 13.35   | 36.47   |
| PF3D7_1210200   | zinc finger protein, putative                                                   | 1.47  | 0.65    | 2.04    |
| PF3D7_1210300   | conserved Plasmodium protein, unknown function                                  | -1.62 | 20.62   | 7.55    |
| PF3D7_1210400   | general transcription factor 3C polypeptide 5, putative                         | -1.28 | 35.56   | 16.55   |
| PF3D7_1210500   | conserved Plasmodium protein, unknown function                                  | -1.43 | 1.50    | 0.62    |
| PF3D7_1210600   | conserved Plasmodium protein, unknown function                                  | -0.77 | 76.98   | 50.94   |
| PF3D7_1210700   | conserved Plasmodium protein, unknown function                                  | -0.20 | 3.92    | 3.87    |
| PF3D7_1210800   | small nucleolar RNA snoR14                                                      | -0.70 | 2.02    | 1.36    |
| PF3D7_1210900   | GPI mannosyltransferase I (PIGM)                                                | 0.54  | 4.22    | 6.95    |
| PF3D7_1211000   | kinesin-7, putative                                                             | 1.43  | 2.41    | 7.34    |
| PF3D7_1211100   | HSP20-like chaperone                                                            | 1.13  | 5.18    | 12.83   |
| PF3D7_1211200   | conserved Plasmodium protein, unknown function                                  | -0.93 | 32.68   | 19.44   |
| PF3D7_1211300   | DNA helicase MCM8, putative (MCM8)                                              | 0.80  | 8.83    | 17.40   |
| PF3D7_1211400   | heat shock protein DNAJ homologue Pfj4 (Pjf4)                                   | -0.93 | 392.01  | 232.05  |
| PF3D7_1211500   | mitochondrial ribosomal protein S18 precursor, putative                         | -1.05 | 19.34   | 10.55   |
| PF3D7_1211600   | lysine-specific histone demethylase 1, putative (LSD1)                          | -0.28 | 17.30   | 16.04   |
| PF3D7_1211700   | DNA replication licensing factor MCM5, putative (MCM5)                          | 0.40  | 75.86   | 112.86  |
| PF3D7_1211800   | polyubiquitin (PipUB)                                                           | -0.45 | 2818.58 | 2328.65 |
| PF3D7_1211900   | non-SERCA-type Ca <sup>2+</sup> -transporting P-ATPase (ATP4)                   | -0.92 | 221.99  | 132.15  |
| PF3D7_1212000   | glutathione peroxidase-like thioredoxin peroxidase (TPx(GI))                    | 0.32  | 32.15   | 45.29   |
| PF3D7_1212100   | peripheral plastid protein 1, putative (PPP1)                                   | 0.28  | 10.46   | 14.39   |
| PF3D7_1212200   | conserved Plasmodium protein, unknown function                                  | 1.13  | 0.92    | 2.30    |
| PF3D7_1212300   | WD repeat-containing protein, putative                                          | 1.24  | 1.98    | 5.30    |
| PF3D7_1212400   | tetratricopeptide repeat family protein, putative                               | 0.26  | 3.77    | 5.11    |
| PF3D7_1212500   | glycerol-3-phosphate 1-O-acyltransferase (GAT)                                  | -1.42 | 148.65  | 62.53   |
| PF3D7_1212600.1 | conserved protein, unknown function                                             | -0.57 | 11.20   | 8.51    |
| PF3D7_1212600.2 | conserved protein, unknown function                                             | -1.11 | 5.14    | 2.65    |
| PF3D7_1212700   | eukaryotic translation initiation factor 3 subunit A, putative (EIF3A)          | -0.77 | 1055.97 | 700.46  |
| PF3D7_1212800   | iron-sulfur subunit of succinate dehydrogenase                                  | 0.86  | 26.55   | 54.54   |
| PF3D7_1212900   | bromodomain protein 2, putative (BDP2)                                          | 0.24  | 215.89  | 288.74  |
| PF3D7_1213000   | unspecified product                                                             | 1.46  | 0.18    | 0.62    |
| PF3D7_1213100   | U1 spliceosomal RNA                                                             | 2.54  | 4.51    | 30.42   |
| PF3D7_1213200   | conserved Plasmodium protein, unknown function                                  | -0.25 | 10.57   | 10.06   |
| PF3D7_1213300   | conserved Plasmodium protein, unknown function                                  | 0.39  | 0.60    | 0.93    |
| PF3D7_1213400   | conserved Plasmodium protein, unknown function                                  | 1.97  | 0.88    | 3.95    |
| PF3D7_1213500   | integral membrane protein GPR180, putative                                      | 1.20  | 0.78    | 2.04    |
| PF3D7_1213600   | dynein light chain 1, putative (DLC8)                                           | 0.43  | 28.99   | 44.16   |
| PF3D7_1213700   | RNA polymerase subunit 8c, putative                                             | -0.63 | 35.08   | 25.54   |
| PF3D7_1213800   | proline--tRNA ligase (PRS)                                                      | -1.27 | 175.83  | 82.28   |
| PF3D7_1213900   | conserved Plasmodium protein, unknown function                                  | -1.56 | 147.89  | 56.47   |
| PF3D7_1214000   | conserved Plasmodium protein, unknown function                                  | 1.00  | 4.42    | 10.08   |
| PF3D7_1214100   | GPI ethanolamine phosphate transferase 3, putative (PIGO)                       | 0.12  | 7.51    | 9.20    |
| PF3D7_1214200   | histone-lysine N-methyltransferase, putative (SET5)                             | 0.15  | 3.75    | 4.72    |
| PF3D7_1214300   | geranylgeranyl transferase type2 beta subunit, putative                         | -1.60 | 40.40   | 15.03   |
| PF3D7_1214400   | ER membrane protein complex subunit 6, putative (EMC6)                          | -1.09 | 52.45   | 27.81   |
| PF3D7_1214500   | conserved Plasmodium protein, unknown function                                  | -1.28 | 4.51    | 2.08    |
| PF3D7_1214600   | adrenodoxin-type ferredoxin, putative                                           | -1.40 | 27.05   | 11.52   |



|                 |                                                                   |       |         |         |
|-----------------|-------------------------------------------------------------------|-------|---------|---------|
| PF3D7_1214700   | conserved Plasmodium protein, unknown function                    | -0.16 | 11.03   | 11.15   |
| PF3D7_1214800   | conserved Plasmodium protein, unknown function                    | -0.25 | 0.68    | 0.65    |
| PF3D7_1214900   | conserved Plasmodium membrane protein, unknown function           | 0.52  | 19.46   | 31.61   |
| PF3D7_1215000   | thioredoxin peroxidase 2 (Trx-Px2)                                | 0.97  | 13.73   | 30.45   |
| PF3D7_1215100   | conserved Plasmodium protein, unknown function                    | -0.27 | 14.60   | 13.70   |
| PF3D7_1215200   | peptidyl-prolyl cis-trans isomerase (CYP32)                       | 1.32  | 5.53    | 15.63   |
| PF3D7_1215300   | 10 kDa chaperonin (CPN10)                                         | 0.79  | 15.08   | 29.55   |
| PF3D7_1215400   | conserved Plasmodium protein, unknown function                    | 0.57  | 16.91   | 28.35   |
| PF3D7_1215500   | conserved Plasmodium protein, unknown function                    | 0.44  | 3.95    | 6.13    |
| PF3D7_1215600   | conserved Plasmodium protein, unknown function                    | 0.65  | 7.84    | 13.96   |
| PF3D7_1215700   | conserved Plasmodium protein, unknown function                    | 0.41  | 0.07    | 0.10    |
| PF3D7_1215800   | conserved Plasmodium protein, unknown function                    | 2.02  | 0.06    | 0.35    |
| PF3D7_1215900   | serpentine receptor, putative (SR10)                              | -1.91 | 18.38   | 5.53    |
| PF3D7_1216000   | serine--tRNA ligase, putative                                     | -0.82 | 19.81   | 12.69   |
| PF3D7_1216100   | conserved Plasmodium membrane protein, unknown function           | 0.00  | 2.01    | 2.28    |
| PF3D7_1216200   | glycerol-3-phosphate dehydrogenase, putative                      | -0.47 | 136.43  | 110.98  |
| PF3D7_1216300   | signal recognition particle subunit SRP19 (SRP19)                 | -1.32 | 98.14   | 44.46   |
| PF3D7_1216400   | conserved Plasmodium membrane protein, unknown function           | -0.83 | 75.68   | 48.20   |
| PF3D7_1216500   | male development gene 1 (MDV1)                                    | 1.88  | 31.41   | 130.46  |
| PF3D7_1216600   | cell traversal protein for ookinetes and sporozoites (CeITOS)     | 5.44  | 0.37    | 19.95   |
| PF3D7_1216700   | perforin-like protein 2 (PLP2)                                    | -0.02 | 5.04    | 5.62    |
| PF3D7_1216800   | tRNA Proline                                                      | -0.79 | 2.18    | 1.35    |
| PF3D7_1216900   | DNA-binding chaperone, putative                                   | -0.92 | 374.96  | 224.43  |
| PF3D7_1217000   | conserved Plasmodium protein, unknown function                    | -0.56 | 1.72    | 1.32    |
| PF3D7_1217100.1 | meiotic recombination protein SPO11, putative (SPO11)             | 0.63  | 3.87    | 6.77    |
| PF3D7_1217100.2 | meiotic recombination protein SPO11, putative (SPO11)             | 0.62  | 4.02    | 6.98    |
| PF3D7_1217200   | snoRNA-associated small subunit rRNA processing protein, putative | -0.82 | 101.50  | 65.12   |
| PF3D7_1217300   | GTP-binding protein, putative                                     | 0.00  | 58.07   | 65.43   |
| PF3D7_1217400   | conserved Plasmodium protein, unknown function                    | 0.83  | 26.45   | 53.11   |
| PF3D7_1217500   | conserved Plasmodium protein, unknown function                    | -1.09 | 219.79  | 116.46  |
| PF3D7_1217600   | anaphase promoting complex subunit 10, putative                   | 0.33  | 7.22    | 10.28   |
| PF3D7_1217700   | conserved Plasmodium protein, unknown function                    | -0.69 | 50.43   | 35.21   |
| PF3D7_1217800   | zinc finger protein, putative                                     | -0.34 | 28.11   | 25.02   |
| PF3D7_1217900   | conserved protein, unknown function                               | 0.41  | 19.30   | 28.98   |
| PF3D7_1218000   | thrombospondin-related apical membrane protein (TRAMP)            | 3.24  | 8.25    | 88.49   |
| PF3D7_1218100   | conserved Plasmodium protein, unknown function                    | 2.88  | 1.14    | 9.65    |
| PF3D7_1218200   | conserved Plasmodium protein, unknown function                    | -1.16 | 33.05   | 16.65   |
| PF3D7_1218300   | AP-2 complex subunit mu, putative (AP2-MU)                        | -1.42 | 83.57   | 35.18   |
| PF3D7_1218400   | triose or hexose phosphate/phosphate translocator, putative       | -0.94 | 134.41  | 79.05   |
| PF3D7_1218500   | conserved Plasmodium protein, unknown function                    | -0.76 | 140.85  | 94.15   |
| PF3D7_1218600   | arginine--tRNA ligase, putative                                   | -1.69 | 82.92   | 28.93   |
| PF3D7_1218700   | conserved Plasmodium protein, unknown function                    | -0.15 | 2.13    | 2.17    |
| PF3D7_1218800   | secreted ookinete protein, putative (PSOP17)                      | 0.80  | 4.16    | 8.22    |
| PF3D7_1218900   | conserved Plasmodium protein, unknown function                    | -0.60 | 11.63   | 8.68    |
| PF3D7_1219000   | formin 2                                                          | 1.07  | 25.56   | 60.42   |
| PF3D7_1219100   | clathrin heavy chain, putative                                    | -1.26 | 83.49   | 39.39   |
| PF3D7_1219200   | rifin, pseudogene (RIF)                                           | -0.54 | 6.55    | 5.09    |
| PF3D7_1219300   | erythrocyte membrane protein 1, PfEMP1 (VAR)                      | 4.89  | 2.27    | 75.89   |
| PF3D7_1219400   | erythrocyte membrane protein 1 (PfEMP1), pseudogene (VAR)         | 5.02  | 15.26   | 558.43  |
| PF3D7_1219500   | erythrocyte membrane protein 1 (PfEMP1), exon 2, pseudogene (VAR) | 4.88  | 0.33    | 11.89   |
| PF3D7_1219600   | aminophospholipid-transporting P-ATPase (ATPase2)                 | -0.72 | 74.30   | 51.10   |
| PF3D7_1219700   | raf kinase inhibitor (RKIP)                                       | 2.96  | 1.95    | 17.48   |
| PF3D7_1219800   | conserved Plasmodium protein, unknown function                    | 0.76  | 0.55    | 1.20    |
| PF3D7_1219900   | D-ribulose-5-phosphate 3-epimerase, putative                      | -0.20 | 16.41   | 16.10   |
| PF3D7_1220000   | conserved Plasmodium protein, unknown function                    | 0.53  | 0.39    | 0.66    |
| PF3D7_1220100   | pre-mRNA-processing factor 17, putative (PRP17)                   | -0.93 | 46.32   | 27.46   |
| PF3D7_1220200   | conserved Plasmodium protein, unknown function, pseudogene        | -0.57 | 0.91    | 0.69    |
| PF3D7_1220300   | cell cycle associated protein, putative                           | 0.46  | 5.33    | 8.31    |
| PF3D7_1220400   | debranching enzyme-associated ribonuclease, putative (DRN1)       | -0.53 | 18.85   | 14.73   |
| PF3D7_1220500   | ribosome biogenesis protein TSR3, putative (TSR3)                 | -1.28 | 21.95   | 10.18   |
| PF3D7_1220600   | conserved Plasmodium protein, unknown function                    | -0.72 | 10.31   | 7.05    |
| PF3D7_1220700   | conserved Plasmodium protein, unknown function                    | 1.18  | 0.78    | 2.06    |
| PF3D7_1220800   | unspecified product                                               | 0.74  | 0.67    | 1.27    |
| PF3D7_1220900   | heterochromatin protein 1 (HP1)                                   | 0.15  | 374.45  | 470.18  |
| PF3D7_1221000   | histone-lysine N-methyltransferase, H3 lysine-4 specific (SET10)  | 0.43  | 21.70   | 33.02   |
| PF3D7_1221100   | conserved Plasmodium protein, unknown function                    | -0.10 | 2.15    | 2.27    |
| PF3D7_1221200   | conserved Plasmodium protein, unknown function                    | -0.52 | 23.31   | 18.40   |
| PF3D7_1221300   | conserved Plasmodium protein, unknown function                    | 0.64  | 21.43   | 37.79   |
| PF3D7_1221400   | inner membrane complex protein 1h, putative (IMC1h)               | 1.11  | 7.91    | 19.32   |
| PF3D7_1221500   | conserved Plasmodium protein, unknown function                    | 1.08  | 1.55    | 3.71    |
| PF3D7_1221600   | protein TSSC1, putative                                           | 1.06  | 1.89    | 4.46    |
| PF3D7_1221700   | FbpA domain protein, putative                                     | -0.06 | 5.71    | 6.18    |
| PF3D7_1221800   | conserved Plasmodium protein, unknown function                    | 0.60  | 11.87   | 20.40   |
| PF3D7_1221900   | conserved Plasmodium membrane protein, unknown function           | -1.56 | 365.58  | 139.94  |
| PF3D7_1222000   | conserved protein, unknown function                               | 0.14  | 4.15    | 5.16    |
| PF3D7_1222100   | conserved Plasmodium protein, unknown function                    | -0.01 | 8.04    | 9.00    |
| PF3D7_1222200   | small nucleolar RNA snoR15                                        | -1.18 | 0.93    | 0.40    |
| PF3D7_1222300   | endoplasmic reticulum chaperone, putative (GRP94)                 | 0.47  | 198.90  | 310.46  |
| PF3D7_1222400   | transcription factor with AP2 domain(s) (ApiAP2)                  | 0.58  | 8.41    | 14.18   |
| PF3D7_1222500   | ATP-binding protein, putative                                     | 0.68  | 40.55   | 73.61   |
| PF3D7_1222600   | transcription factor with AP2 domain(s) (AP2-G)                   | -1.54 | 13.48   | 5.24    |
| PF3D7_1222700   | glideosome-associated protein 45 (GAP45)                          | 2.19  | 209.72  | 1084.27 |
| PF3D7_1222800   | conserved Plasmodium protein, unknown function                    | 0.64  | 1.07    | 1.92    |
| PF3D7_1222900   | conserved Plasmodium protein, unknown function                    | 0.37  | 3.06    | 4.48    |
| PF3D7_1223000   | conserved Plasmodium protein, unknown function                    | 1.98  | 13.16   | 58.90   |
| PF3D7_1223100   | cAMP-dependent protein kinase regulatory subunit (PKAr)           | 1.28  | 219.91  | 602.11  |
| PF3D7_1223200   | nucleus export protein BRR6, putative                             | -1.27 | 52.86   | 24.77   |
| PF3D7_1223300   | DNA gyrase subunit A (GyrA)                                       | -0.47 | 22.85   | 18.65   |
| PF3D7_1223400   | phospholipid-transporting ATPase, putative                        | -0.47 | 280.35  | 227.88  |
| PF3D7_1223500   | conserved Plasmodium protein, unknown function                    | -0.93 | 17.88   | 10.61   |
| PF3D7_1223600   | conserved Plasmodium protein, unknown function                    | -1.29 | 4.12    | 1.90    |
| PF3D7_1223700   | iron transporter, putative                                        | 0.20  | 36.92   | 47.87   |
| PF3D7_1223800   | mitochondrial carrier protein, putative                           | -1.73 | 48.11   | 16.36   |
| PF3D7_1223900   | 50S ribosomal protein L24, putative                               | 1.33  | 6.12    | 17.41   |
| PF3D7_1224000   | GTP cyclohydrolase I (GCH1)                                       | -0.59 | 38.81   | 29.20   |
| PF3D7_1224100   | conserved Plasmodium protein, unknown function                    | 0.65  | 34.90   | 61.74   |
| PF3D7_1224200   | conserved Plasmodium protein, unknown function                    | 1.81  | 4.19    | 16.59   |
| PF3D7_1224300   | polyadenylate-binding protein, putative (PABP)                    | -0.71 | 2688.29 | 1850.29 |

|                 |                                                                           |       |        |         |
|-----------------|---------------------------------------------------------------------------|-------|--------|---------|
| PF3D7_1224400   | conserved Plasmodium protein, unknown function                            | -1.34 | 57.70  | 25.69   |
| PF3D7_1224500   | histone chaperone ASF1, putative (ASF1)                                   | 0.20  | 49.60  | 64.30   |
| PF3D7_1224600   | cytochrome c heme lyase, putative                                         | -0.97 | 34.02  | 19.55   |
| PF3D7_1224700   | conserved Plasmodium protein, unknown function                            | -0.42 | 33.32  | 28.03   |
| PF3D7_1224800   | conserved Plasmodium protein, unknown function                            | -0.19 | 19.33  | 19.17   |
| PF3D7_1224900   | splicing factor 3B subunit 6, putative (SF3B6)                            | 0.00  | 28.47  | 32.18   |
| PF3D7_1225000   | conserved Plasmodium protein, unknown function                            | 0.38  | 0.73   | 1.08    |
| PF3D7_1225100   | isoleucine--tRNA ligase, putative                                         | 0.54  | 2.13   | 3.50    |
| PF3D7_1225200   | conserved Plasmodium protein, unknown function                            | -1.36 | 47.29  | 20.76   |
| PF3D7_1225300   | conserved Plasmodium protein, unknown function                            | -0.94 | 84.61  | 49.95   |
| PF3D7_1225400   | conserved Plasmodium protein, unknown function                            | -0.89 | 26.93  | 16.44   |
| PF3D7_1225500   | small subunit rRNA processing factor, putative                            | -1.74 | 58.37  | 19.68   |
| PF3D7_1225600   | conserved Plasmodium protein, unknown function                            | -1.37 | 74.53  | 32.60   |
| PF3D7_1225700   | conserved Plasmodium protein, unknown function                            | -1.17 | 62.31  | 31.29   |
| PF3D7_1225800   | ubiquitin-activating enzyme E1 (UBA1)                                     | -1.09 | 131.51 | 69.61   |
| PF3D7_1225900   | conserved Plasmodium protein, unknown function                            | 0.03  | 5.70   | 6.59    |
| PF3D7_1226000   | conserved Plasmodium protein, unknown function                            | 0.89  | 1.50   | 3.16    |
| PF3D7_1226100   | haloacid dehalogenase-like hydrolase, putative (HAD3)                     | 0.70  | 5.91   | 10.84   |
| PF3D7_1226200   | conserved Plasmodium protein, unknown function                            | -0.88 | 4.16   | 2.55    |
| PF3D7_1226300   | haloacid dehalogenase-like hydrolase, putative (HAD2)                     | -0.41 | 389.50 | 331.01  |
| PF3D7_1226400   | conserved Plasmodium protein, unknown function                            | -0.42 | 28.57  | 24.16   |
| PF3D7_1226500   | RAP protein, putative                                                     | 0.35  | 2.71   | 3.92    |
| PF3D7_1226600   | proliferating cell nuclear antigen 2 (PCNA2)                              | 0.86  | 18.96  | 38.86   |
| PF3D7_1226700   | U3 small nucleolar RNA-interacting protein 2, putative (RRP9)             | -1.05 | 52.24  | 28.45   |
| PF3D7_1226800   | ataxin-3, putative (ATX3)                                                 | 0.53  | 14.01  | 22.91   |
| PF3D7_1226900   | conserved Plasmodium protein, unknown function                            | 0.39  | 8.73   | 12.92   |
| PF3D7_1227000   | conserved Plasmodium protein, unknown function                            | 0.27  | 7.38   | 10.10   |
| PF3D7_1227100   | DNA helicase 60 (DH60)                                                    | -0.24 | 36.26  | 34.57   |
| PF3D7_1227200   | potassium channel (K1)                                                    | -1.16 | 35.02  | 17.75   |
| PF3D7_1227300   | conserved Plasmodium protein, unknown function                            | -0.30 | 3.60   | 3.30    |
| PF3D7_1227400   | conserved Plasmodium protein, unknown function                            | -0.74 | 32.18  | 21.81   |
| PF3D7_1227500   | cyclin (CYC2)                                                             | 0.35  | 14.99  | 21.58   |
| PF3D7_1227600   | cyclin related protein, putative                                          | 0.29  | 42.74  | 58.93   |
| PF3D7_1227700   | conserved Plasmodium protein, unknown function                            | -0.27 | 98.48  | 92.08   |
| PF3D7_1227800   | histone S-adenosyl methyltransferase, putative                            | -0.98 | 130.24 | 74.55   |
| PF3D7_1227900   | RNA pseudouridylylase, putative                                           | -2.03 | 21.90  | 6.04    |
| PF3D7_1228000   | conserved Plasmodium protein, unknown function                            | -0.52 | 9.03   | 7.11    |
| PF3D7_1228100   | leucine-rich repeat protein (LRR13)                                       | -0.04 | 4.97   | 5.45    |
| PF3D7_1228200   | conserved Plasmodium protein, unknown function                            | 1.33  | 0.50   | 1.44    |
| PF3D7_1228300   | NIMA related kinase 1 (NEK1)                                              | 1.02  | 30.57  | 70.21   |
| PF3D7_1228400   | conserved Plasmodium protein, unknown function                            | -1.63 | 115.96 | 42.36   |
| PF3D7_1228500   | RNA pseudouridylylase, putative                                           | 0.56  | 10.56  | 17.64   |
| PF3D7_1228600   | merozoite surface protein 9 (MSP9)                                        | 0.65  | 826.10 | 1464.95 |
| PF3D7_1228700   | conserved Plasmodium protein, unknown function                            | 0.65  | 13.62  | 24.10   |
| PF3D7_1228800   | WD repeat-containing protein, putative                                    | 0.43  | 47.00  | 71.49   |
| PF3D7_1228900   | conserved Plasmodium protein, unknown function                            | -0.33 | 33.35  | 29.94   |
| PF3D7_1229000   | conserved Plasmodium membrane protein, unknown function                   | -1.20 | 19.18  | 9.44    |
| PF3D7_1229100   | multidrug resistance-associated protein 2 (MRP2)                          | -2.31 | 690.70 | 157.50  |
| PF3D7_1229200   | unspecified product                                                       | -1.93 | 2.51   | 0.73    |
| PF3D7_1229300   | conserved Plasmodium protein, unknown function                            | -0.57 | 64.96  | 49.47   |
| PF3D7_1229400   | macrophage migration inhibitory factor (MIF)                              | -1.23 | 570.46 | 273.75  |
| PF3D7_1229500   | T-complex protein 1 subunit gamma (CCT3)                                  | -0.93 | 326.11 | 192.80  |
| PF3D7_1229600   | conserved Plasmodium protein, unknown function                            | 0.90  | 13.80  | 29.15   |
| PF3D7_1229700   | conserved Plasmodium protein, unknown function                            | 0.99  | 3.33   | 7.59    |
| PF3D7_1229800   | myosin D (MyoD)                                                           | 1.80  | 18.66  | 73.54   |
| PF3D7_1229900.1 | conserved Plasmodium protein, unknown function                            | 0.61  | 8.97   | 15.52   |
| PF3D7_1229900.2 | conserved Plasmodium protein, unknown function                            | 0.62  | 8.93   | 15.53   |
| PF3D7_1230000   | conserved Plasmodium protein, unknown function                            | -0.18 | 11.10  | 11.10   |
| PF3D7_1230100   | thioredoxin-like associated protein 1, putative (TLAP1)                   | 1.94  | 3.44   | 14.92   |
| PF3D7_1230200   | vacuolar transporter chaperone, putative, pseudogene                      | 1.42  | 2.84   | 8.62    |
| PF3D7_1230300   | subpellicular microtubule protein 2, putative (SPM2)                      | 1.56  | 3.17   | 10.61   |
| PF3D7_1230400   | ATP-dependent protease subunit ClpQ (ClpQ)                                | -0.04 | 19.64  | 21.58   |
| PF3D7_1230500   | WD repeat-containing protein, putative                                    | -2.02 | 47.26  | 13.17   |
| PF3D7_1230600   | sun-family protein, putative                                              | 0.17  | 18.34  | 23.32   |
| PF3D7_1230700   | protein transport protein SEC13 (SEC13)                                   | -1.27 | 301.94 | 141.06  |
| PF3D7_1230800   | conserved Plasmodium protein, unknown function                            | -0.96 | 148.11 | 85.94   |
| PF3D7_1230900   | serine/threonine protein kinase RIO1, putative (RIO1)                     | -1.05 | 211.25 | 115.43  |
| PF3D7_1231000   | conserved Plasmodium protein, unknown function                            | 1.40  | 7.82   | 23.27   |
| PF3D7_1231100   | ras-related protein Rab-2 (RAB2)                                          | 0.41  | 103.35 | 155.38  |
| PF3D7_1231200   | conserved Plasmodium protein, unknown function                            | 3.87  | 6.46   | 107.08  |
| PF3D7_1231300   | conserved Plasmodium protein, unknown function                            | 3.06  | 1.80   | 17.02   |
| PF3D7_1231400   | amino acid transporter, putative                                          | 2.25  | 8.96   | 48.07   |
| PF3D7_1231500   | mitosis protein dim1, putative                                            | -0.09 | 49.17  | 52.25   |
| PF3D7_1231600   | pre-mRNA-splicing factor ATP-dependent RNA helicase PRP2, putative (PRP2) | -0.66 | 52.59  | 37.64   |
| PF3D7_1231700   | conserved Plasmodium protein, unknown function                            | -2.39 | 12.74  | 2.68    |
| PF3D7_1231800   | asparagine-rich protein, putative                                         | -2.48 | 127.64 | 25.76   |
| PF3D7_1231900   | conserved Plasmodium protein, unknown function                            | -0.56 | 3.24   | 2.47    |
| PF3D7_1232000   | phenylalanine--tRNA ligase (aFRS)                                         | -0.06 | 3.83   | 4.16    |
| PF3D7_1232100   | 60 kDa chaperonin (CPN60)                                                 | 0.58  | 59.28  | 100.35  |
| PF3D7_1232200   | dihydrolipoyl dehydrogenase, mitochondrial (LPD1)                         | 0.90  | 10.49  | 22.20   |
| PF3D7_1232300   | cytochrome b5, putative                                                   | 0.80  | 3.31   | 6.54    |
| PF3D7_1232400   | conserved protein, unknown function                                       | -0.70 | 44.35  | 30.90   |
| PF3D7_1232500   | CG2-related protein, putative                                             | 2.03  | 26.65  | 122.80  |
| PF3D7_1232600   | conserved Plasmodium protein, unknown function                            | 1.46  | 9.75   | 30.28   |
| PF3D7_1232700   | conserved Plasmodium protein, unknown function                            | 0.95  | 9.57   | 20.86   |
| PF3D7_1232800   | conserved Plasmodium protein, unknown function                            | 0.85  | 3.39   | 6.95    |
| PF3D7_1232900   | nucleotidyltransferase, putative                                          | 0.85  | 4.63   | 9.42    |
| PF3D7_1233000   | elongation factor G (EF-G)                                                | -0.17 | 12.08  | 12.10   |
| PF3D7_1233100   | conserved protein, unknown function                                       | -0.66 | 43.21  | 30.81   |
| PF3D7_1233200.1 | conserved Plasmodium protein, unknown function                            | 0.98  | 5.97   | 13.31   |
| PF3D7_1233200.2 | conserved Plasmodium protein, unknown function                            | 0.98  | 5.98   | 13.32   |
| PF3D7_1233300   | pentatricopeptide repeat protein, putative                                | 1.12  | 4.29   | 10.56   |
| PF3D7_1233400   | conserved Plasmodium membrane protein, unknown function                   | -1.42 | 56.25  | 23.67   |
| PF3D7_1233600   | asparagine and aspartate rich protein 1 (AARP1)                           | -0.75 | 53.30  | 37.02   |
| PF3D7_1233700   | homocysteine S-methyltransferase, putative                                | 0.13  | 3.14   | 3.90    |
| PF3D7_1233800   | conserved Plasmodium protein, unknown function                            | 0.33  | 41.91  | 59.51   |
| PF3D7_1233900   | sentrin-specific protease 1 (SEN1)                                        | -0.97 | 35.06  | 20.27   |
| PF3D7_1234000   | conserved Plasmodium protein, unknown function                            | -0.63 | 12.95  | 9.47    |

|               |                                                                                                  |       |         |        |
|---------------|--------------------------------------------------------------------------------------------------|-------|---------|--------|
| PF3D7_1234100 | bromodomain protein, putative                                                                    | -0.68 | 45.33   | 32.03  |
| PF3D7_1234200 | conserved Plasmodium protein, unknown function, pseudogene                                       | 0.90  | 6.23    | 13.12  |
| PF3D7_1234300 | DNA polymerase epsilon subunit b, putative                                                       | 0.89  | 7.28    | 15.24  |
| PF3D7_1234400 | aspartyl protease, putative                                                                      | -0.70 | 1.24    | 0.86   |
| PF3D7_1234500 | conserved Plasmodium protein, unknown function                                                   | -1.37 | 30.78   | 13.45  |
| PF3D7_1234600 | conserved Plasmodium protein, unknown function                                                   | 0.40  | 8.69    | 12.93  |
| PF3D7_1234700 | CPW-WPC family protein                                                                           | 0.92  | 1.78    | 3.82   |
| PF3D7_1234800 | splicing factor 3B subunit 3, putative (SF3B3)                                                   | -1.05 | 99.82   | 54.55  |
| PF3D7_1234900 | conserved Plasmodium protein, unknown function                                                   | 0.92  | 133.27  | 284.36 |
| PF3D7_1235000 | PIH1 domain-containing protein, putative (PIH1)                                                  | 1.23  | 1.85    | 4.93   |
| PF3D7_1235100 | conserved Plasmodium protein, unknown function                                                   | 0.50  | 5.39    | 8.66   |
| PF3D7_1235200 | V-type K <sup>+</sup> -independent H <sup>+</sup> -translocating inorganic pyrophosphatase (VP2) | 0.21  | 25.57   | 33.36  |
| PF3D7_1235300 | CCR4-NOT transcription complex subunit 4, putative (NOT4)                                        | -0.87 | 214.66  | 132.20 |
| PF3D7_1235400 | tetQ family GTPase, putative                                                                     | 0.22  | 6.09    | 8.03   |
| PF3D7_1235500 | mRNA methyltransferase, putative                                                                 | -1.07 | 48.71   | 26.22  |
| PF3D7_1235600 | serine hydroxymethyltransferase (SHMT)                                                           | 0.92  | 64.94   | 138.75 |
| PF3D7_1235700 | ATP synthase subunit beta, mitochondrial                                                         | 0.85  | 24.75   | 50.52  |
| PF3D7_1235800 | conserved Plasmodium protein, unknown function                                                   | 0.43  | 0.65    | 0.99   |
| PF3D7_1235900 | pre-mRNA-splicing factor SYF1, putative (XAB2)                                                   | -1.41 | 63.56   | 26.98  |
| PF3D7_1236000 | vesicle transport v-SNARE protein VTH1, putative                                                 | -0.29 | 18.48   | 17.10  |
| PF3D7_1236100 | clustered-asparagine-rich protein                                                                | -1.99 | 401.03  | 113.97 |
| PF3D7_1236200 | conserved Plasmodium protein, unknown function                                                   | 1.66  | 21.34   | 76.27  |
| PF3D7_1236300 | conserved Plasmodium protein, unknown function                                                   | 0.59  | 7.64    | 12.98  |
| PF3D7_1236400 | conserved Plasmodium protein, unknown function                                                   | -1.34 | 62.38   | 27.88  |
| PF3D7_1236500 | conserved Plasmodium protein, unknown function                                                   | 1.74  | 0.88    | 3.42   |
| PF3D7_1236600 | p25-alpha family protein, putative                                                               | 1.14  | 2.64    | 6.62   |
| PF3D7_1236700 | S-adenosyl-methyltransferase, putative                                                           | 0.54  | 13.30   | 21.93  |
| PF3D7_1236800 | protein-S-isoprenylcysteine O-methyltransferase, putative                                        | 0.38  | 13.43   | 19.76  |
| PF3D7_1236900 | conserved Plasmodium protein, unknown function                                                   | 1.00  | 26.16   | 59.25  |
| PF3D7_1237000 | SUMO-activating enzyme subunit 2 (UBA2)                                                          | -0.51 | 20.85   | 16.53  |
| PF3D7_1237100 | conserved Plasmodium protein, unknown function                                                   | 0.57  | 8.23    | 13.83  |
| PF3D7_1237200 | conserved Plasmodium protein, unknown function                                                   | -0.90 | 44.78   | 27.18  |
| PF3D7_1237300 | conserved Plasmodium protein, unknown function                                                   | -0.67 | 1.55    | 1.10   |
| PF3D7_1237400 | conserved Plasmodium protein, unknown function                                                   | -0.31 | 23.64   | 21.59  |
| PF3D7_1237500 | conserved Plasmodium protein, unknown function                                                   | -1.27 | 71.38   | 33.39  |
| PF3D7_1237600 | periodic tryptophan protein 1, putative (PWP1)                                                   | -1.16 | 43.42   | 21.87  |
| PF3D7_1237700 | conserved protein, unknown function                                                              | 0.14  | 188.58  | 234.44 |
| PF3D7_1237800 | ubiquitin-like modifier HUB1, putative (HUB1)                                                    | -1.53 | 23.71   | 9.22   |
| PF3D7_1237900 | conserved Plasmodium protein, unknown function                                                   | 0.46  | 225.19  | 350.07 |
| PF3D7_1238000 | COPI associated protein, putative                                                                | 0.49  | 22.65   | 36.02  |
| PF3D7_1238100 | calyculin binding protein, putative                                                              | -0.30 | 116.92  | 107.07 |
| PF3D7_1238200 | conserved Plasmodium protein, unknown function                                                   | -1.44 | 0.51    | 0.20   |
| PF3D7_1238300 | cell cycle control protein, putative                                                             | -0.97 | 133.65  | 77.01  |
| PF3D7_1238400 | conserved Plasmodium protein, unknown function                                                   | 0.46  | 2.02    | 3.15   |
| PF3D7_1238500 | conserved Plasmodium protein, unknown function                                                   | 1.42  | 12.78   | 38.53  |
| PF3D7_1238600 | sphingomyelin phosphodiesterase, putative                                                        | 0.69  | 36.69   | 67.01  |
| PF3D7_1238700 | conserved Plasmodium protein, unknown function                                                   | 0.93  | 8.13    | 17.54  |
| PF3D7_1238800 | acyl-CoA synthetase (ACS11)                                                                      | -0.55 | 255.03  | 196.73 |
| PF3D7_1238900 | protein kinase 2 (PK2)                                                                           | 2.68  | 16.05   | 115.91 |
| PF3D7_1239000 | HD superfamily phosphohydrolase protein                                                          | 0.60  | 32.87   | 56.21  |
| PF3D7_1239100 | mitochondrial ribosomal protein L23 precursor, putative                                          | 0.69  | 9.57    | 17.49  |
| PF3D7_1239200 | transcription factor with AP2 domain(s) (ApiAP2)                                                 | 0.33  | 31.60   | 44.99  |
| PF3D7_1239300 | conserved Plasmodium protein, unknown function                                                   | -2.70 | 54.48   | 9.46   |
| PF3D7_1239400 | conserved Plasmodium protein, unknown function                                                   | 1.83  | 1.08    | 4.48   |
| PF3D7_1239500 | DNA gyrase subunit B (GyrB)                                                                      | 0.11  | 7.92    | 9.68   |
| PF3D7_1239600 | hydroxyethylthiazole kinase (ThzK)                                                               | 1.09  | 12.47   | 30.00  |
| PF3D7_1239700 | ATP-dependent zinc metalloprotease FTSH 1 (FTSH1)                                                | 0.77  | 51.16   | 98.33  |
| PF3D7_1239800 | conserved Plasmodium protein, unknown function                                                   | 1.03  | 6.52    | 15.05  |
| PF3D7_1239900 | vacuolar protein sorting-associated protein 16, putative (VPS16)                                 | -1.40 | 33.21   | 14.18  |
| PF3D7_1240000 | 3-hydroxyisobutyryl-coenzyme A hydrolase, putative                                               | -1.88 | 32.22   | 9.87   |
| PF3D7_1240100 | early transcribed membrane protein 12 (ETRAPM12)                                                 | 0.24  | 17.89   | 23.90  |
| PF3D7_1240200 | erythrocyte membrane protein 1 (PEMP1), pseudogene                                               | -1.82 | 0.99    | 0.31   |
| PF3D7_1240300 | erythrocyte membrane protein 1, PfEMP1 (VAR)                                                     | -0.68 | 2.61    | 1.84   |
| PF3D7_1240400 | erythrocyte membrane protein 1, PfEMP1 (VAR)                                                     | -1.94 | 9.36    | 2.76   |
| PF3D7_1240500 | Plasmodium RNA of unknown function RUF6-5                                                        | -7.23 | 36.80   | 0.14   |
| PF3D7_1240600 | erythrocyte membrane protein 1, PfEMP1 (VAR)                                                     | -8.01 | 967.17  | 4.23   |
| PF3D7_1240700 | rifin, pseudogene (RIF)                                                                          | -2.79 | 1.01    | 0.15   |
| PF3D7_1240800 | Plasmodium RNA of unknown function RUF6-14                                                       | -0.38 | 0.00    | 0.00   |
| PF3D7_1240900 | erythrocyte membrane protein 1, PfEMP1 (VAR)                                                     | -0.14 | 12.42   | 12.72  |
| PF3D7_1241000 | Plasmodium RNA of unknown function RUF6-15                                                       | -0.38 | 0.00    | 0.00   |
| PF3D7_1241100 | polyadenylation factor subunit 2, putative (PFS2)                                                | -0.81 | 98.16   | 63.14  |
| PF3D7_1241200 | conserved Plasmodium protein, unknown function                                                   | -0.80 | 18.39   | 11.95  |
| PF3D7_1241300 | conserved Plasmodium protein, unknown function                                                   | 0.70  | 1.98    | 3.66   |
| PF3D7_1241400 | RNA-binding protein, putative                                                                    | 0.34  | 1.48    | 2.11   |
| PF3D7_1241500 | conserved Plasmodium protein, unknown function                                                   | 0.10  | 5.96    | 7.21   |
| PF3D7_1241600 | mitochondrial carrier protein, putative                                                          | 0.15  | 3.54    | 4.45   |
| PF3D7_1241700 | replication factor C subunit 4, putative (RFC4)                                                  | 0.88  | 22.33   | 46.31  |
| PF3D7_1241800 | DEAD/DEAH box ATP-dependent RNA helicase, putative                                               | -0.94 | 159.64  | 93.72  |
| PF3D7_1241900 | tetratricopeptide repeat protein, putative                                                       | -0.86 | 105.99  | 65.96  |
| PF3D7_1242000 | conserved Plasmodium protein, unknown function                                                   | -0.76 | 10.57   | 7.02   |
| PF3D7_1242100 | conserved Plasmodium protein, unknown function                                                   | -2.09 | 16.23   | 4.24   |
| PF3D7_1242200 | queuine tRNA-ribosyltransferase, putative (TGT)                                                  | -0.67 | 27.33   | 19.35  |
| PF3D7_1242300 | conserved Plasmodium membrane protein, unknown function                                          | 1.12  | 5.55    | 13.65  |
| PF3D7_1242400 | GAS8-like protein, putative                                                                      | 0.41  | 2.80    | 4.22   |
| PF3D7_1242500 | conserved protein, unknown function                                                              | 0.42  | 7.99    | 12.08  |
| PF3D7_1242600 | protein geranylgeranyltransferase type II, alpha subunit, putative                               | -1.66 | 31.80   | 11.38  |
| PF3D7_1242700 | 40S ribosomal protein S17, putative                                                              | -0.85 | 1320.77 | 825.33 |
| PF3D7_1242800 | rab specific GDP dissociation inhibitor (rabGDI)                                                 | -1.00 | 446.52  | 252.71 |
| PF3D7_1242900 | mitochondrial import inner membrane translocase subunit TIM13, putative (TIM13)                  | 0.51  | 15.63   | 25.24  |
| PF3D7_1243000 | syntaxin, Qa-SNARE family (SYN16)                                                                | 1.33  | 9.93    | 28.22  |
| PF3D7_1243100 | zinc finger protein, putative                                                                    | -0.77 | 63.70   | 42.08  |
| PF3D7_1243200 | conserved Plasmodium protein, unknown function                                                   | -2.00 | 2.93    | 0.77   |
| PF3D7_1243300 | conserved Plasmodium protein, unknown function                                                   | 4.50  | 0.37    | 11.86  |
| PF3D7_1243400 | conserved Plasmodium protein, unknown function                                                   | 2.78  | 2.39    | 18.58  |
| PF3D7_1243500 | vacuolar-sorting protein SNF7, putative (SNF7)                                                   | 0.80  | 16.94   | 33.29  |
| PF3D7_1243600 | translation initiation factor SUI1, putative                                                     | 0.22  | 356.34  | 469.28 |
| PF3D7_1243700 | ubiquitin-conjugating enzyme E2, putative                                                        | 3.22  | 40.83   | 428.38 |
| PF3D7_1243800 | WD repeat-containing protein 82, putative (WDR82)                                                | 0.76  | 60.90   | 116.84 |

|                 |                                                                      |       |        |         |
|-----------------|----------------------------------------------------------------------|-------|--------|---------|
| PF3D7_1243900   | double C2-like domain-containing protein (DOC2)                      | 0.82  | 9.82   | 19.56   |
| PF3D7_1244000   | glucose inhibited division protein a homologue, putative             | 0.62  | 8.31   | 14.40   |
| PF3D7_1244100   | N-alpha-acetyltransferase 15, NatA auxiliary subunit, putative       | 0.51  | 32.11  | 51.51   |
| PF3D7_1244200   | RNA polymerase II transcription factor B subunit 2, putative (TFB2)  | -1.72 | 70.24  | 24.01   |
| PF3D7_1244300   | ACEA small nucleolar RNA U3                                          | 2.13  | 5.65   | 28.27   |
| PF3D7_1244400   | conserved Plasmodium protein, unknown function                       | 3.09  | 15.50  | 149.52  |
| PF3D7_1244500   | conserved Plasmodium protein, unknown function                       | 2.93  | 2.67   | 23.11   |
| PF3D7_1244600   | ADP-ribosylation factor GTPase-activating protein, putative (ARFGAP) | -0.18 | 77.85  | 77.45   |
| PF3D7_1244700   | conserved Plasmodium protein, unknown function                       | 1.53  | 14.46  | 47.31   |
| PF3D7_1244800   | cytoplasmic translation machinery associated protein, putative       | -0.81 | 151.93 | 97.59   |
| PF3D7_1244900   | conserved Plasmodium protein, unknown function                       | 0.98  | 3.06   | 6.84    |
| PF3D7_1245000   | conserved Plasmodium protein, unknown function                       | 0.17  | 5.06   | 6.43    |
| PF3D7_1245100   | kinesin-13, putative (KLP8)                                          | 0.32  | 8.42   | 11.89   |
| PF3D7_1245200   | conserved Plasmodium membrane protein, unknown function              | 0.53  | 0.77   | 1.26    |
| PF3D7_1245300   | NEDD8-conjugating enzyme UBC12, putative (UBC12)                     | 1.91  | 3.07   | 13.16   |
| PF3D7_1245400   | mitochondrial ribosomal protein L3 precursor, putative               | 0.86  | 8.58   | 17.63   |
| PF3D7_1245500   | conserved Plasmodium protein, unknown function                       | 1.32  | 6.80   | 19.26   |
| PF3D7_1245600   | kinesin, putative                                                    | 1.77  | 0.57   | 2.20    |
| PF3D7_1245700   | unspecified product                                                  | -2.14 | 0.39   | 0.09    |
| PF3D7_1245800   | epsin, putative                                                      | 0.77  | 58.35  | 112.52  |
| PF3D7_1245900   | conserved Plasmodium protein, unknown function                       | -2.79 | 21.54  | 3.50    |
| PF3D7_1246000   | conserved Plasmodium protein, unknown function                       | -1.18 | 2.92   | 1.45    |
| PF3D7_1246100   | delta-aminolevulinic acid synthetase (ALAS)                          | 1.27  | 3.80   | 10.37   |
| PF3D7_1246200   | actin I (ACT1)                                                       | 2.28  | 801.77 | 4401.72 |
| PF3D7_1246300   | conserved Plasmodium protein, unknown function                       | -0.77 | 178.75 | 118.29  |
| PF3D7_1246400   | myosin A tail domain interacting protein (MTIP)                      | 3.55  | 79.73  | 1053.59 |
| PF3D7_1246500   | conserved Plasmodium protein, unknown function                       | -1.23 | 10.73  | 5.16    |
| PF3D7_1246600   | pre-mRNA-splicing factor, putative                                   | -0.98 | 43.92  | 25.17   |
| PF3D7_1246700   | conserved Plasmodium protein, unknown function                       | 0.66  | 6.01   | 10.71   |
| PF3D7_1246800   | signal recognition particle receptor, beta subunit (SRPR-beta)       | 0.54  | 40.30  | 66.41   |
| PF3D7_1246900   | RAC-beta serine/threonine protein kinase (PKB)                       | 1.06  | 4.61   | 10.84   |
| PF3D7_1247000.1 | DNA replication origin binding protein, putative (DIA2)              | 0.57  | 6.17   | 10.35   |
| PF3D7_1247000.2 | DNA replication origin binding protein, putative (DIA2)              | 0.57  | 6.24   | 10.46   |
| PF3D7_1247100   | conserved Plasmodium protein, unknown function                       | -0.83 | 25.74  | 16.29   |
| PF3D7_1247200   | conserved Plasmodium protein, unknown function                       | -1.17 | 39.76  | 19.94   |
| PF3D7_1247300   | GPI mannosyltransferase 2, putative                                  | -0.49 | 35.59  | 28.58   |
| PF3D7_1247400   | FK506-binding protein (FKBP)-type peptidyl-prolyl isomerase (FKBP35) | 0.27  | 61.54  | 83.86   |
| PF3D7_1247500   | serine/threonine protein kinase, putative                            | 0.45  | 12.55  | 19.38   |
| PF3D7_1247600   | conserved Plasmodium protein, unknown function                       | 1.15  | 1.42   | 3.58    |
| PF3D7_1247700   | conserved Plasmodium protein, unknown function                       | 1.71  | 3.75   | 13.93   |
| PF3D7_1247800   | dipeptidyl aminopeptidase 2 (DPAP2)                                  | 1.73  | 7.07   | 26.56   |
| PF3D7_1247900   | nucleolar rRNA processing protein, putative                          | -1.58 | 98.29  | 37.12   |
| PF3D7_1248000   | conserved Plasmodium protein, unknown function                       | -0.08 | 6.59   | 7.03    |
| PF3D7_1248100   | methyltransferase, putative                                          | -1.29 | 53.73  | 24.80   |
| PF3D7_1248200   | RNA-binding protein, putative                                        | -0.58 | 89.01  | 67.36   |
| PF3D7_1248300   | conserved Plasmodium membrane protein, unknown function              | -0.13 | 12.34  | 12.71   |
| PF3D7_1248400   | conserved Plasmodium protein, unknown function                       | 2.31  | 1.72   | 9.75    |
| PF3D7_1248500   | bax inhibitor 1, putative                                            | 0.23  | 640.50 | 845.66  |
| PF3D7_1248600   | conserved Plasmodium protein, unknown function                       | -0.65 | 23.56  | 17.01   |
| PF3D7_1248700   | conserved Plasmodium protein, unknown function                       | 0.04  | 397.21 | 459.94  |
| PF3D7_1248800   | conserved Plasmodium protein, unknown function                       | 0.39  | 3.30   | 4.92    |
| PF3D7_1248900   | 26S protease regulatory subunit 8, putative (RPT6)                   | 0.16  | 147.79 | 186.99  |
| PF3D7_1249000   | conserved Plasmodium membrane protein, unknown function              | -1.94 | 3.84   | 1.12    |
| PF3D7_1249100   | conserved Plasmodium protein, unknown function                       | -1.24 | 122.33 | 58.42   |
| PF3D7_1249200   | conserved Plasmodium protein, unknown function                       | -0.38 | 1.86   | 1.62    |
| PF3D7_1249300   | protein phosphatase PPM4, putative (PPM4)                            | -0.62 | 43.89  | 32.17   |
| PF3D7_1249400   | conserved Plasmodium protein, unknown function                       | 1.58  | 19.34  | 65.33   |
| PF3D7_1249500   | cutA, putative                                                       | 0.89  | 9.57   | 20.06   |
| PF3D7_1249600   | leucine-rich repeat protein (LRR12)                                  | 1.01  | 3.82   | 8.72    |
| PF3D7_1249700   | conserved Plasmodium protein, unknown function                       | 1.91  | 0.67   | 2.89    |
| PF3D7_1249800   | THO complex subunit 2, putative (THO2)                               | -0.59 | 43.98  | 32.99   |
| PF3D7_1249900   | apicoplast dimethyladenosine synthase, putative                      | -0.76 | 53.16  | 35.37   |
| PF3D7_1250000   | rRNA-processing protein, putative                                    | -0.41 | 167.75 | 142.70  |
| PF3D7_1250100   | osmiophilic body protein (G377)                                      | 1.32  | 0.40   | 1.13    |
| PF3D7_1250200   | conserved Plasmodium membrane protein, unknown function              | 0.05  | 93.60  | 109.56  |
| PF3D7_1250300   | vacuolar protein sorting-associated protein 26, putative (VPS26)     | 0.36  | 42.77  | 61.94   |
| PF3D7_1250400   | conserved Plasmodium protein, unknown function                       | 0.48  | 2.43   | 3.85    |
| PF3D7_1250500   | AP-3 complex subunit sigma, putative                                 | -0.14 | 35.16  | 35.94   |
| PF3D7_1250600   | eukaryotic translation initiation factor 2b, subunit 2, putative     | -1.34 | 86.63  | 38.75   |
| PF3D7_1250700   | conserved Plasmodium protein, unknown function                       | -0.88 | 43.75  | 26.75   |
| PF3D7_1250800   | DNA repair protein rhp16, putative                                   | 0.03  | 26.37  | 30.41   |
| PF3D7_1250900   | conserved Plasmodium protein, unknown function                       | -0.19 | 10.83  | 10.73   |
| PF3D7_1251000   | conserved Plasmodium protein, unknown function                       | 0.52  | 2.64   | 4.31    |
| PF3D7_1251100   | conserved Plasmodium protein, unknown function                       | -1.07 | 121.35 | 65.06   |
| PF3D7_1251200   | coronin                                                              | 3.29  | 99.00  | 1093.38 |
| PF3D7_1251300   | thymidylate kinase (TMK)                                             | 0.96  | 13.77  | 30.27   |
| PF3D7_1251400   | conserved Plasmodium protein, unknown function                       | -1.27 | 5.86   | 2.74    |
| PF3D7_1251500   | DEAD/DEAH box ATP-dependent RNA helicase, putative                   | -1.01 | 135.98 | 76.34   |
| PF3D7_1251600   | conserved Plasmodium protein, unknown function                       | -1.29 | 102.54 | 47.21   |
| PF3D7_1251700   | tryptophan--tRNA ligase, putative (aTrpRS)                           | -0.52 | 8.68   | 6.82    |
| PF3D7_1251800   | conserved Plasmodium protein, unknown function                       | -0.72 | 34.86  | 23.86   |
| PF3D7_1251900   | tRNA Valine                                                          | 2.43  | 0.00   | 1.60    |
| PF3D7_1252000   | tRNA Glutamic acid                                                   | -0.38 | 0.62   | 0.54    |
| PF3D7_1252100   | rhoptry neck protein 3 (RON3)                                        | -0.39 | 91.30  | 78.54   |
| PF3D7_1252200   | chitinase (CHT1)                                                     | 1.73  | 11.25  | 42.34   |
| PF3D7_1252300   | conserved Plasmodium protein, unknown function                       | -1.41 | 431.58 | 183.42  |
| PF3D7_1252400   | reticulocyte binding protein homologue 3, pseudogene (RH3)           | 4.17  | 7.95   | 161.08  |
| PF3D7_1252500   | Plasmodium exported protein, unknown function                        | 0.04  | 3.38   | 3.93    |
| PF3D7_1252600   | lysophospholipase, putative                                          | -1.66 | 132.31 | 47.40   |
| PF3D7_1252700   | Plasmodium exported protein (PHISTb), unknown function               | -0.87 | 77.30  | 47.93   |
| PF3D7_1252800   | Plasmodium exported protein (PHISTb), unknown function               | 0.13  | 70.45  | 87.27   |
| PF3D7_1252900   | Plasmodium exported protein, unknown function                        | -1.53 | 127.98 | 49.98   |
| PF3D7_1253000   | gametocyte erythrocyte cytosolic protein (GECO)                      | -1.81 | 809.20 | 260.31  |
| PF3D7_1253100   | Plasmodium exported protein (PHISTa), unknown function               | -2.15 | 163.10 | 41.48   |
| PF3D7_1253200   | Plasmodium exported protein, unknown function                        | -1.66 | 66.24  | 23.67   |
| PF3D7_1253300   | Plasmodium exported protein (PHISTa), unknown function, pseudogene   | -1.38 | 376.84 | 163.93  |
| PF3D7_1253400   | acyl-CoA synthetase (ACS3)                                           | 0.25  | 15.95  | 21.44   |
| PF3D7_1253500   | Plasmodium exported protein, unknown function                        | -2.61 | 2.30   | 0.40    |

|                 |                                                                                   |       |         |        |
|-----------------|-----------------------------------------------------------------------------------|-------|---------|--------|
| PF3D7_1253600   | rifin, pseudogene (RIF)                                                           | -0.38 | 0.05    | 0.05   |
| PF3D7_1253700   | rifin (RIF)                                                                       | -1.60 | 0.12    | 0.03   |
| PF3D7_1253800   | Plasmodium exported protein (PHISTa), unknown function                            | -0.90 | 4.27    | 2.58   |
| PF3D7_1253900   | Plasmodium exported protein (PHISTa), unknown function, pseudogene                | -0.05 | 0.08    | 0.09   |
| PF3D7_1254000   | rifin (RIF)                                                                       | -1.11 | 0.09    | 0.04   |
| PF3D7_1254100   | stevor                                                                            | 2.62  | 0.00    | 0.15   |
| PF3D7_1254200   | rifin (RIF)                                                                       | 0.04  | 0.17    | 0.20   |
| PF3D7_1254300   | stevor                                                                            | 1.95  | 0.00    | 0.09   |
| PF3D7_1254400   | rifin (RIF)                                                                       | -0.51 | 0.41    | 0.32   |
| PF3D7_1254500   | rifin (RIF)                                                                       | -0.50 | 0.27    | 0.21   |
| PF3D7_1254600   | stevor                                                                            | 0.76  | 0.10    | 0.21   |
| PF3D7_1254700   | rifin (RIF)                                                                       | 1.50  | 0.05    | 0.20   |
| PF3D7_1254800   | rifin (RIF)                                                                       | -2.11 | 0.21    | 0.04   |
| PF3D7_1254900   | Plasmodium exported protein, unknown function, fragment                           | -0.38 | 0.00    | 0.00   |
| PF3D7_1255000   | rifin (RIF)                                                                       | -1.96 | 0.04    | 0.00   |
| PF3D7_1255100   | rifin (RIF)                                                                       | -3.64 | 1.00    | 0.07   |
| PF3D7_1255200   | erythrocyte membrane protein 1, PfEMP1 (VAR)                                      | -1.68 | 5.21    | 1.84   |
| PF3D7_1300100   | erythrocyte membrane protein 1, PfEMP1 (VAR)                                      | 1.16  | 4.44    | 11.19  |
| PF3D7_1300200   | rifin (RIF)                                                                       | 1.09  | 7.49    | 17.98  |
| PF3D7_1300300   | erythrocyte membrane protein 1, PfEMP1 (VAR)                                      | -1.19 | 1.56    | 0.77   |
| PF3D7_1300400   | rifin (RIF)                                                                       | -0.75 | 0.46    | 0.30   |
| PF3D7_1300500   | rifin (RIF)                                                                       | 0.69  | 0.20    | 0.39   |
| PF3D7_1300600   | rifin (RIF)                                                                       | 2.32  | 0.76    | 4.36   |
| PF3D7_1300700   | rifin (RIF)                                                                       | -0.14 | 0.20    | 0.21   |
| PF3D7_1300800   | erythrocyte membrane protein 1-like (VAR-like)                                    | 4.92  | 0.05    | 2.65   |
| PF3D7_1300900   | stevor                                                                            | 2.95  | 0.00    | 0.19   |
| PF3D7_1301000   | rifin, pseudogene (RIF)                                                           | 0.36  | 0.04    | 0.07   |
| PF3D7_1301100   | Plasmodium exported protein (PHISTa), unknown function, pseudogene                | -0.70 | 0.11    | 0.07   |
| PF3D7_1301200   | glycophorin binding protein (GBPH2)                                               | -4.04 | 10.96   | 0.74   |
| PF3D7_1301300   | Plasmodium exported protein (PHISTa-like), unknown function, pseudogene           | -1.22 | 10.75   | 5.21   |
| PF3D7_1301400   | Plasmodium exported protein (hyp12), unknown function (HYP12)                     | -1.48 | 554.54  | 224.56 |
| PF3D7_1301500   | Plasmodium exported protein (PHISTa), unknown function                            | 2.31  | 2.10    | 11.86  |
| PF3D7_1301600   | erythrocyte binding antigen-140 (EBA140)                                          | 4.22  | 46.77   | 985.65 |
| PF3D7_1301700   | Plasmodium exported protein (hyp8), unknown function (GEXP07)                     | -1.62 | 1831.98 | 673.69 |
| PF3D7_1301800   | surface-associated interspersed protein 13.1 (SURFIN 13.1), pseudogene (SURF13.1) | -0.24 | 12.09   | 11.55  |
| PF3D7_1301900   | Plasmodium exported protein, unknown function                                     | 0.78  | 3.24    | 6.34   |
| PF3D7_1302000   | EMP1-trafficking protein (PTP6)                                                   | -1.66 | 940.05  | 335.92 |
| PF3D7_1302100   | gamete antigen 27/25 (G27/25)                                                     | 1.33  | 66.82   | 190.28 |
| PF3D7_1302200   | early transcribed membrane protein 13 (ETRAMP13)                                  | 2.23  | 1.40    | 7.54   |
| PF3D7_1302300   | Plasmodium exported protein, unknown function                                     | 0.49  | 46.26   | 73.63  |
| PF3D7_1302400   | conserved Plasmodium membrane protein, unknown function                           | 0.01  | 1.27    | 1.47   |
| PF3D7_1302500   | conserved Plasmodium protein, unknown function                                    | -0.74 | 23.55   | 15.87  |
| PF3D7_1302600   | deoxyhypusine hydroxylase (DOHH)                                                  | -1.28 | 78.96   | 36.79  |
| PF3D7_1302700   | DEAD/DEAH box ATP-dependent RNA helicase, putative                                | -0.51 | 64.97   | 51.47  |
| PF3D7_1302800   | 40S ribosomal protein S7, putative                                                | -1.02 | 691.90  | 384.31 |
| PF3D7_1302900   | conserved Plasmodium protein, unknown function                                    | -0.60 | 6.02    | 4.49   |
| PF3D7_1303000   | conserved Plasmodium protein, unknown function                                    | 0.66  | 12.21   | 21.86  |
| PF3D7_1303100   | methyltransferase-like protein, putative                                          | -0.03 | 15.77   | 17.45  |
| PF3D7_1303200.1 | SNARE protein, putative (VAMP8)                                                   | -0.36 | 7.29    | 6.43   |
| PF3D7_1303200.2 | SNARE protein, putative (VAMP8)                                                   | -0.34 | 7.51    | 6.68   |
| PF3D7_1303300   | conserved Plasmodium protein, unknown function                                    | -2.04 | 16.31   | 4.47   |
| PF3D7_1303400   | conserved Plasmodium protein, unknown function                                    | -0.66 | 170.67  | 122.37 |
| PF3D7_1303500   | sodium/hydrogen exchanger, Na <sup>+</sup> , H <sup>+</sup> antiporter (NHE)      | -0.72 | 113.54  | 77.69  |
| PF3D7_1303600   | conserved Plasmodium protein, unknown function                                    | -0.50 | 20.12   | 16.09  |
| PF3D7_1303700   | conserved Plasmodium protein, unknown function                                    | 0.68  | 5.95    | 10.75  |
| PF3D7_1303800   | conserved Plasmodium protein, unknown function                                    | 1.04  | 4.94    | 11.45  |
| PF3D7_1303900   | conserved Plasmodium protein, unknown function                                    | 1.41  | 1.10    | 3.38   |
| PF3D7_1304000   | chromosome condensation protein, putative                                         | 0.40  | 15.89   | 23.75  |
| PF3D7_1304100   | DNA ligase I (LigI)                                                               | 0.08  | 17.86   | 21.39  |
| PF3D7_1304200.1 | CorA-like Mg <sup>2+</sup> transporter protein, putative                          | 0.09  | 9.95    | 11.93  |
| PF3D7_1304200.2 | CorA-like Mg <sup>2+</sup> transporter protein, putative                          | 0.08  | 9.68    | 11.59  |
| PF3D7_1304300   | conserved Plasmodium protein, unknown function                                    | -0.83 | 6.52    | 4.13   |
| PF3D7_1304400   | conserved Plasmodium protein, unknown function                                    | -0.63 | 33.51   | 24.54  |
| PF3D7_1304500   | small heat shock protein, putative                                                | 1.41  | 24.02   | 71.92  |
| PF3D7_1304600   | conserved Plasmodium protein, unknown function                                    | 0.59  | 2.56    | 4.34   |
| PF3D7_1304700   | cyclin (CYC4)                                                                     | 1.23  | 3.75    | 9.99   |
| PF3D7_1304800   | small nucleolar RNA snoR16                                                        | -1.67 | 4.94    | 1.65   |
| PF3D7_1304900   | DNA-directed RNA polymerase 2, putative                                           | -1.42 | 56.97   | 24.09  |
| PF3D7_1305000   | conserved Plasmodium protein, unknown function                                    | 0.25  | 16.34   | 22.02  |
| PF3D7_1305100   | conserved Plasmodium protein, unknown function                                    | 0.76  | 8.16    | 15.62  |
| PF3D7_1305200   | transcription factor with AP2 domain(s) (ApiAP2)                                  | 1.11  | 2.02    | 4.96   |
| PF3D7_1305300   | conserved Plasmodium protein, unknown function                                    | -1.61 | 54.84   | 20.34  |
| PF3D7_1305400   | AAR2 protein, putative                                                            | -1.66 | 32.60   | 11.61  |
| PF3D7_1305500   | mitogen-activated protein kinase phosphatase 1, putative (MKP1)                   | -0.81 | 4.26    | 2.74   |
| PF3D7_1305600   | membrane integral peptidase, M50 family, putative                                 | 0.47  | 5.77    | 9.07   |
| PF3D7_1305700   | conserved Plasmodium protein, unknown function                                    | 1.58  | 1.63    | 5.61   |
| PF3D7_1305800   | conserved Plasmodium protein, unknown function                                    | -0.15 | 0.13    | 0.14   |
| PF3D7_1305900   | conserved Plasmodium protein, unknown function                                    | 0.79  | 13.80   | 26.97  |
| PF3D7_1306000   | conserved Plasmodium protein, unknown function                                    | 0.43  | 3.74    | 5.70   |
| PF3D7_1306100   | conserved Plasmodium protein, unknown function                                    | 0.25  | 5.84    | 7.86   |
| PF3D7_1306200   | conserved Plasmodium protein, unknown function                                    | -0.68 | 15.48   | 10.89  |
| PF3D7_1306300   | SAM dependent methyltransferase, putative                                         | 0.82  | 1.62    | 3.25   |
| PF3D7_1306400   | 26S protease regulatory subunit 10B, putative (RPT4)                              | 0.01  | 248.12  | 281.46 |
| PF3D7_1306500   | MORN repeat protein, putative                                                     | 0.71  | 0.55    | 1.01   |
| PF3D7_1306600   | V-type proton ATPase subunit H, putative                                          | -2.07 | 40.74   | 10.93  |
| PF3D7_1306700   | conserved Plasmodium protein, unknown function                                    | 0.35  | 3.73    | 5.38   |
| PF3D7_1306800   | RED-like protein, putative                                                        | -0.94 | 29.42   | 17.25  |
| PF3D7_1306900   | U1 small nuclear ribonucleoprotein A, putative                                    | -1.27 | 68.73   | 32.09  |
| PF3D7_1307000   | exosome complex component RRP40, putative (RRP40)                                 | -1.13 | 53.81   | 27.78  |
| PF3D7_1307100   | U3 small nucleolar RNA-associated protein 6, putative                             | -1.52 | 57.49   | 22.57  |
| PF3D7_1307200   | DnaJ protein, putative                                                            | -0.53 | 37.47   | 29.29  |
| PF3D7_1307300   | DEAD box helicase, putative                                                       | -1.21 | 14.32   | 6.97   |
| PF3D7_1307400   | conserved Plasmodium protein, unknown function                                    | 0.22  | 1.33    | 1.76   |
| PF3D7_1307500   | conserved Plasmodium protein, unknown function                                    | 0.86  | 21.06   | 43.21  |
| PF3D7_1307600   | DNA-directed RNA polymerase alpha chain, putative                                 | 0.98  | 37.30   | 83.36  |
| PF3D7_1307700   | conserved Plasmodium protein, unknown function                                    | -0.13 | 49.73   | 51.23  |
| PF3D7_1307800   | fork head domain protein, putative                                                | -0.78 | 38.59   | 25.41  |
| PF3D7_1307900   | tripartite motif protein, putative                                                | 0.18  | 8.41    | 10.77  |

|               |                                                                                     |       |        |         |
|---------------|-------------------------------------------------------------------------------------|-------|--------|---------|
| PF3D7_1308000 | conserved Plasmodium membrane protein, unknown function                             | 1.40  | 21.55  | 64.33   |
| PF3D7_1308100 | CCAAT-binding transcription factor, putative                                        | 0.78  | 12.64  | 24.59   |
| PF3D7_1308200 | carbamoyl phosphate synthetase (cpsSII)                                             | -1.49 | 297.00 | 119.62  |
| PF3D7_1308300 | 40S ribosomal protein S27 (RPS27)                                                   | -1.50 | 965.79 | 385.27  |
| PF3D7_1308400 | conserved Plasmodium protein, unknown function                                      | -0.13 | 18.12  | 18.68   |
| PF3D7_1308500 | conserved Plasmodium protein, unknown function                                      | 1.66  | 5.29   | 18.88   |
| PF3D7_1308600 | conserved Plasmodium protein, unknown function                                      | 0.52  | 0.70   | 1.14    |
| PF3D7_1308700 | conserved Plasmodium protein, unknown function                                      | 1.04  | 10.73  | 24.90   |
| PF3D7_1308800 | tyrosine recombinase (INT)                                                          | 0.69  | 16.61  | 30.29   |
| PF3D7_1308900 | mRNA-decapping enzyme 2, putative (DCP2)                                            | -2.05 | 135.82 | 36.93   |
| PF3D7_1309000 | conserved Plasmodium protein, unknown function                                      | -1.95 | 105.17 | 30.74   |
| PF3D7_1309100 | 60S ribosomal protein L24, putative                                                 | -0.43 | 694.80 | 582.92  |
| PF3D7_1309120 | unspecified product                                                                 | -0.55 | 135.35 | 104.56  |
| PF3D7_1309200 | protein phosphatase PPM6, putative (PPM6)                                           | -0.40 | 58.30  | 49.99   |
| PF3D7_1309300 | U4/U6 small nuclear ribonucleoprotein PRP3, putative (PRPF3)                        | -1.43 | 129.95 | 54.43   |
| PF3D7_1309400 | HORMA domain protein, putative                                                      | 0.16  | 30.12  | 37.97   |
| PF3D7_1309500 | H/ACA ribonucleoprotein complex subunit 1, putative (GAR1)                          | -1.72 | 66.63  | 22.89   |
| PF3D7_1309600 | ribosomal RNA methyltransferase, putative                                           | -1.97 | 37.23  | 10.75   |
| PF3D7_1309700 | vacuolar protein sorting-associated protein 18, putative (VPS18)                    | -1.60 | 27.39  | 10.23   |
| PF3D7_1309800 | conserved Plasmodium protein, unknown function                                      | 0.53  | 7.66   | 12.48   |
| PF3D7_1309900 | conserved Plasmodium protein, unknown function                                      | 0.76  | 0.83   | 1.61    |
| PF3D7_1310000 | mitochondrial ATP synthase delta subunit, putative (OSCP)                           | 0.49  | 2.38   | 3.79    |
| PF3D7_1310100 | conserved Plasmodium protein, unknown function                                      | 0.47  | 0.97   | 1.53    |
| PF3D7_1310200 | conserved Plasmodium protein, unknown function                                      | 1.60  | 20.96  | 71.64   |
| PF3D7_1310300 | zinc finger protein, putative                                                       | 1.12  | 10.24  | 25.15   |
| PF3D7_1310400 | conserved Plasmodium protein, unknown function                                      | 0.38  | 43.63  | 64.28   |
| PF3D7_1310500 | conserved protein, unknown function                                                 | -0.60 | 42.70  | 31.88   |
| PF3D7_1310600 | ras-related protein Rab-5B (RAB5b)                                                  | 0.98  | 34.89  | 77.84   |
| PF3D7_1310700 | RNA-binding protein, putative                                                       | 4.15  | 127.29 | 2554.68 |
| PF3D7_1310800 | conserved Plasmodium protein, unknown function                                      | -1.16 | 41.43  | 20.99   |
| PF3D7_1310900 | mitochondrial ribosomal protein S15 precursor, putative                             | -0.24 | 15.08  | 14.45   |
| PF3D7_1311000 | protein ISD11, putative (ISD11)                                                     | -0.62 | 13.24  | 9.75    |
| PF3D7_1311100 | meiosis-specific nuclear structural protein 1, putative                             | -0.08 | 5.93   | 6.34    |
| PF3D7_1311200 | alternative splicing regulator, putative                                            | -0.93 | 24.89  | 14.77   |
| PF3D7_1311300 | ATP synthase subunit gamma, mitochondrial                                           | 0.73  | 7.66   | 14.37   |
| PF3D7_1311400 | AP-1 complex subunit mu-1 (AP1M1)                                                   | -1.05 | 142.31 | 77.72   |
| PF3D7_1311500 | 26S protease regulatory subunit 7, putative (RPT1)                                  | 0.01  | 213.18 | 242.08  |
| PF3D7_1311600 | conserved Plasmodium protein, unknown function                                      | -0.83 | 74.03  | 46.96   |
| PF3D7_1311700 | cytochrome c2 precursor, putative                                                   | -0.53 | 64.59  | 50.59   |
| PF3D7_1311800 | M1-family alanyl aminopeptidase (M1AAP)                                             | -1.40 | 913.23 | 391.14  |
| PF3D7_1311900 | V-type proton ATPase catalytic subunit A (vapA)                                     | -1.11 | 297.93 | 156.34  |
| PF3D7_1312000 | malonyl CoA-acyl carrier protein transacylase precursor (MCAT)                      | 0.62  | 4.90   | 8.52    |
| PF3D7_1312100 | conserved Plasmodium protein, unknown function                                      | 0.45  | 7.27   | 11.23   |
| PF3D7_1312200 | conserved Plasmodium protein, unknown function                                      | 0.40  | 4.39   | 6.56    |
| PF3D7_1312300 | mitochondrial ribosomal protein S35 precursor, putative                             | 1.59  | 1.83   | 6.31    |
| PF3D7_1312400 | translation initiation factor IF-2, putative (IF2a)                                 | 1.02  | 2.24   | 5.13    |
| PF3D7_1312500 | conserved Plasmodium protein, unknown function                                      | 4.80  | 6.11   | 196.09  |
| PF3D7_1312600 | 2-oxoisovalerate dehydrogenase subunit alpha, mitochondrial, putative (BCKDHA)      | 1.32  | 26.12  | 73.87   |
| PF3D7_1312700 | probable protein, unknown function                                                  | 1.26  | 7.93   | 21.54   |
| PF3D7_1312800 | conserved Plasmodium protein, unknown function                                      | 1.73  | 24.60  | 92.36   |
| PF3D7_1312900 | eukaryotic translation initiation factor 4 gamma (EIF4G)                            | -0.01 | 127.59 | 143.00  |
| PF3D7_1313000 | ubiquitin-like protein nedd8 homologue, putative (Nedd8)                            | 0.68  | 9.99   | 18.22   |
| PF3D7_1313100 | conserved Plasmodium protein, unknown function                                      | 1.26  | 0.20   | 0.54    |
| PF3D7_1313200 | methionyl-tRNA formyltransferase, putative (MTFMT)                                  | -0.56 | 3.59   | 2.74    |
| PF3D7_1313300 | peptidyl-prolyl cis-trans isomerase, putative                                       | 2.16  | 2.62   | 13.36   |
| PF3D7_1313400 | DEAD box helicase, putative                                                         | -0.04 | 8.15   | 8.94    |
| PF3D7_1313500 | conserved Plasmodium membrane protein, unknown function                             | 0.57  | 2.93   | 4.92    |
| PF3D7_1313600 | conserved Plasmodium protein, unknown function                                      | 0.37  | 6.16   | 8.97    |
| PF3D7_1313700 | septum formation protein MAF homologue, putative                                    | -0.68 | 6.14   | 4.31    |
| PF3D7_1313800 | conserved Plasmodium membrane protein, unknown function                             | -0.73 | 45.01  | 30.56   |
| PF3D7_1313900 | conserved Plasmodium protein, unknown function                                      | -1.69 | 17.07  | 5.98    |
| PF3D7_1314000 | conserved Plasmodium protein, unknown function                                      | 0.18  | 2.33   | 2.97    |
| PF3D7_1314100 | conserved Plasmodium protein, unknown function                                      | -1.26 | 14.95  | 7.04    |
| PF3D7_1314200 | telomerase reverse transcriptase (TERT)                                             | 0.61  | 2.18   | 3.77    |
| PF3D7_1314300 | conserved Plasmodium protein, unknown function                                      | 0.24  | 6.10   | 8.13    |
| PF3D7_1314400 | conserved Plasmodium protein, unknown function                                      | -0.55 | 4.19   | 3.22    |
| PF3D7_1314500 | cop-coated vesicle membrane protein p24 precursor, putative                         | -0.68 | 36.00  | 25.42   |
| PF3D7_1314600 | lipoate-protein ligase 1 (LipL1)                                                    | -0.97 | 11.34  | 6.54    |
| PF3D7_1314700 | conserved Plasmodium protein, unknown function                                      | 1.24  | 12.89  | 34.36   |
| PF3D7_1314800 | ubiquitin-like protein, putative                                                    | 0.07  | 1.68   | 2.01    |
| PF3D7_1314900 | general transcription factor IIH subunit 2 (P44)                                    | -1.54 | 103.64 | 40.37   |
| PF3D7_1315000 | conserved Plasmodium protein, unknown function                                      | -1.28 | 64.94  | 30.25   |
| PF3D7_1315100 | serine/threonine protein kinase (PK9)                                               | 0.40  | 3.69   | 5.51    |
| PF3D7_1315200 | conserved Plasmodium protein, unknown function                                      | 0.55  | 3.16   | 5.22    |
| PF3D7_1315300 | conserved Plasmodium protein, unknown function                                      | -0.74 | 15.96  | 10.78   |
| PF3D7_1315400 | zinc finger (CCCH type) protein, putative                                           | -0.58 | 249.81 | 189.10  |
| PF3D7_1315500 | conserved Plasmodium protein, unknown function                                      | -0.27 | 48.49  | 45.48   |
| PF3D7_1315600 | CDP-diacylglycerol--inositol 3-phosphatidyltransferase (PIS)                        | -0.68 | 32.04  | 22.62   |
| PF3D7_1315700 | tRNA (adenine(58)-N(1))-methyltransferase catalytic subunit TRM61, putative (GCD14) | -1.14 | 62.02  | 31.81   |
| PF3D7_1315800 | transcription factor MYB1 (MYB1)                                                    | -0.87 | 56.40  | 34.74   |
| PF3D7_1315900 | exportin-1, putative                                                                | -1.09 | 83.37  | 44.11   |
| PF3D7_1316000 | protein kinase, putative                                                            | 1.06  | 0.52   | 1.26    |
| PF3D7_1316100 | inositol polyphosphate kinase, putative (IPK2)                                      | -0.62 | 32.76  | 24.11   |
| PF3D7_1316200 | ADP-ribosylation factor, putative                                                   | 1.64  | 15.17  | 53.42   |
| PF3D7_1316300 | conserved Plasmodium protein, unknown function                                      | 2.95  | 0.71   | 6.74    |
| PF3D7_1316400 | conserved Plasmodium protein, unknown function                                      | -0.25 | 1.08   | 1.02    |
| PF3D7_1316500 | pre-mRNA-processing factor 40, putative (PRP40)                                     | -0.34 | 48.99  | 43.66   |
| PF3D7_1316600 | choline-phosphate cytidylyltransferase (CCT)                                        | 0.74  | 50.17  | 94.61   |
| PF3D7_1316700 | conserved Plasmodium protein, unknown function                                      | -0.53 | 3.48   | 2.73    |
| PF3D7_1316800 | protein transport protein SEC20, putative (SEC20)                                   | -0.82 | 47.19  | 30.25   |
| PF3D7_1316900 | conserved Plasmodium protein, unknown function                                      | -1.45 | 114.89 | 47.60   |
| PF3D7_1317000 | U4/U6.U5 tri-snRNP-associated protein 2, putative (USP39)                           | -0.84 | 79.09  | 50.01   |
| PF3D7_1317100 | DNA replication licensing factor MCM4 (MCM4)                                        | 0.55  | 65.13  | 107.52  |
| PF3D7_1317200 | transcription factor with AP2 domain(s) (ApiAP2)                                    | 0.26  | 6.77   | 9.14    |
| PF3D7_1317300 | conserved Plasmodium protein, unknown function                                      | -0.17 | 37.16  | 37.21   |
| PF3D7_1317400 | conserved Plasmodium protein, unknown function                                      | -0.03 | 18.59  | 20.53   |
| PF3D7_1317500 | conserved Plasmodium protein, unknown function                                      | 2.09  | 1.00   | 5.13    |
| PF3D7_1317600 | conserved Plasmodium protein, unknown function                                      | -0.25 | 10.22  | 9.72    |

|                 |                                                                                                   |       |         |         |
|-----------------|---------------------------------------------------------------------------------------------------|-------|---------|---------|
| PF3D7_1317700   | conserved Plasmodium protein, unknown function                                                    | -1.94 | 33.41   | 9.79    |
| PF3D7_1317800   | 40S ribosomal protein S19 (RPS19)                                                                 | -1.15 | 1863.21 | 949.73  |
| PF3D7_1317900   | small ribosomal subunit nuclear export protein, putative                                          | -1.63 | 40.34   | 14.75   |
| PF3D7_1318000   | conserved Plasmodium membrane protein, unknown function                                           | -1.19 | 58.96   | 29.12   |
| PF3D7_1318100   | ferredoxin, putative                                                                              | 0.74  | 9.80    | 18.56   |
| PF3D7_1318200   | glycerol-3-phosphate 1-O-acyltransferase, putative (G3PAT)                                        | 0.92  | 0.99    | 2.14    |
| PF3D7_1318300   | conserved Plasmodium protein, unknown function                                                    | -0.07 | 11.80   | 12.71   |
| PF3D7_1318400   | chromosome segregation protein, putative                                                          | 0.66  | 21.19   | 37.82   |
| PF3D7_1318500   | conserved Plasmodium protein, unknown function                                                    | -0.27 | 0.85    | 0.79    |
| PF3D7_1318600   | conserved Plasmodium protein, unknown function                                                    | 0.85  | 2.34    | 4.78    |
| PF3D7_1318700   | conserved Plasmodium protein, unknown function                                                    | 2.53  | 14.42   | 93.94   |
| PF3D7_1318800   | translocation protein SEC63 (SEC63)                                                               | 0.10  | 179.52  | 217.98  |
| PF3D7_1318900   | conserved Plasmodium protein, unknown function                                                    | 1.26  | 4.02    | 10.86   |
| PF3D7_1319000   | conserved Plasmodium protein, unknown function                                                    | 0.98  | 3.39    | 7.54    |
| PF3D7_1319100   | conserved protein, unknown function                                                               | -1.52 | 85.61   | 33.63   |
| PF3D7_1319200   | conserved Plasmodium protein, unknown function                                                    | -0.51 | 6.06    | 4.79    |
| PF3D7_1319300   | N2,N2-dimethylguanosine tRNA methyltransferase, putative                                          | -1.83 | 141.61  | 45.11   |
| PF3D7_1319400   | conserved Plasmodium protein, unknown function                                                    | 0.66  | 41.39   | 74.09   |
| PF3D7_1319500   | conserved Plasmodium protein, unknown function                                                    | 0.41  | 2.09    | 3.21    |
| PF3D7_1319600   | conserved Plasmodium protein, unknown function                                                    | 0.44  | 3.33    | 5.10    |
| PF3D7_1319700   | protein phosphatase PP2A regulatory subunit A, putative                                           | 0.28  | 3.86    | 5.29    |
| PF3D7_1319800   | probable protein, unknown function                                                                | 1.08  | 4.19    | 10.10   |
| PF3D7_1319900   | conserved Plasmodium protein, unknown function                                                    | 0.62  | 0.68    | 1.19    |
| PF3D7_1320000   | rhopty protein 2, putative (PRP2)                                                                 | -1.69 | 154.67  | 54.26   |
| PF3D7_1320100   | ATP-dependent Clp protease adaptor protein ClpS, putative                                         | 0.85  | 9.32    | 19.09   |
| PF3D7_1320200   | TBC domain protein, putative                                                                      | 0.59  | 4.95    | 8.44    |
| PF3D7_1320300   | conserved Plasmodium protein, unknown function                                                    | 0.01  | 6.17    | 6.99    |
| PF3D7_1320400   | type I signal peptidase (SPB)                                                                     | 0.23  | 6.99    | 9.28    |
| PF3D7_1320500   | SNARE protein, putative (SNAP23)                                                                  | -0.05 | 20.22   | 22.10   |
| PF3D7_1320600   | ras-related protein Rab-11A (RAB11a)                                                              | 0.32  | 112.27  | 158.59  |
| PF3D7_1320700   | conserved Plasmodium protein, unknown function                                                    | 0.80  | 17.49   | 34.33   |
| PF3D7_1320800   | dihydrolipoyllysine-residue succinyltransferase component of 2-oxoglutarate dehydrogenase complex | 0.95  | 14.21   | 31.02   |
| PF3D7_1320900   | RNA-binding protein, putative                                                                     | -0.34 | 22.81   | 20.37   |
| PF3D7_1321000   | conserved Plasmodium protein, unknown function                                                    | -0.73 | 0.44    | 0.29    |
| PF3D7_1321100   | conserved Plasmodium protein, unknown function                                                    | 0.84  | 24.90   | 50.17   |
| PF3D7_1321200   | conserved protein, unknown function                                                               | -0.56 | 15.69   | 12.01   |
| PF3D7_1321300   | conserved Plasmodium membrane protein, unknown function                                           | -1.03 | 23.14   | 12.75   |
| PF3D7_1321400   | palmitoyltransferase, putative (DHH8)                                                             | 0.16  | 19.38   | 24.41   |
| PF3D7_1321500.1 | 3',5'-cyclic nucleotide phosphodiesterase, putative (PDEbeta)                                     | 0.40  | 30.62   | 45.67   |
| PF3D7_1321500.2 | 3',5'-cyclic nucleotide phosphodiesterase, putative (PDEbeta)                                     | 0.40  | 30.63   | 45.66   |
| PF3D7_1321600   | phosphodiesterase gamma, putative (PDEgamma)                                                      | 0.77  | 1.92    | 3.72    |
| PF3D7_1321700   | splicing factor 1 (SF1)                                                                           | -0.39 | 203.58  | 175.62  |
| PF3D7_1321800   | protein transport protein SFT2, putative                                                          | -0.93 | 155.85  | 92.18   |
| PF3D7_1321900   | conserved Plasmodium protein, unknown function                                                    | 0.68  | 130.73  | 237.10  |
| PF3D7_1322000   | adenosine-diphosphatase, putative                                                                 | 0.80  | 20.14   | 39.70   |
| PF3D7_1322100   | variant-silencing SET protein (SETvs)                                                             | -1.10 | 74.31   | 39.12   |
| PF3D7_1322200   | conserved Plasmodium protein, unknown function                                                    | 0.56  | 16.30   | 27.23   |
| PF3D7_1322300   | translation initiation factor EIF-2B subunit related                                              | 0.80  | 3.47    | 6.85    |
| PF3D7_1322400   | conserved Plasmodium protein, unknown function                                                    | -0.02 | 3.40    | 3.80    |
| PF3D7_1322500   | palmitoyltransferase, putative (DHH5)                                                             | 0.58  | 24.30   | 41.02   |
| PF3D7_1322600   | conserved Plasmodium protein, unknown function                                                    | 0.99  | 5.04    | 11.33   |
| PF3D7_1322700   | conserved Plasmodium protein, unknown function                                                    | 0.83  | 1.69    | 3.42    |
| PF3D7_1322800   | conserved Plasmodium protein, unknown function                                                    | 1.39  | 1.22    | 3.75    |
| PF3D7_1322900   | conserved Plasmodium protein, unknown function                                                    | 0.43  | 3.14    | 4.80    |
| PF3D7_1323000   | beta-hydroxyacyl-ACP dehydratase (FabZ)                                                           | -0.61 | 20.43   | 15.16   |
| PF3D7_1323100   | 60S ribosomal protein L6, putative                                                                | -1.03 | 894.74  | 495.35  |
| PF3D7_1323200   | V-type proton ATPase subunit G, putative                                                          | -1.11 | 113.14  | 59.26   |
| PF3D7_1323300   | acetyltransferase, GNAT family, putative                                                          | -0.15 | 6.18    | 6.29    |
| PF3D7_1323400   | 60S ribosomal protein L23 (RPL23)                                                                 | -1.17 | 1527.94 | 766.38  |
| PF3D7_1323500   | plasmepsin V (PMV)                                                                                | -1.61 | 118.16  | 43.82   |
| PF3D7_1323600   | conserved Plasmodium protein, unknown function                                                    | 0.55  | 10.09   | 16.73   |
| PF3D7_1323700   | glideosome associated protein with multiple membrane spans 1 (GAPM1)                              | 0.66  | 256.93  | 457.47  |
| PF3D7_1323800   | vacuolar protein sorting-associated protein 52, putative (VPS52)                                  | -1.49 | 20.15   | 8.10    |
| PF3D7_1323900   | protein BCP1, putative                                                                            | -1.43 | 90.11   | 37.67   |
| PF3D7_1324000   | conserved Plasmodium protein, unknown function                                                    | -1.57 | 35.97   | 13.66   |
| PF3D7_1324100   | conserved Plasmodium membrane protein, unknown function                                           | 0.18  | 14.19   | 18.21   |
| PF3D7_1324200   | micro-fibrillar-associated protein, putative                                                      | -0.41 | 110.32  | 93.80   |
| PF3D7_1324300   | conserved Plasmodium membrane protein, unknown function                                           | 0.20  | 4.02    | 5.21    |
| PF3D7_1324400   | MSF1-like protein, putative                                                                       | -1.92 | 78.85   | 23.59   |
| PF3D7_1324500   | DEAD box helicase, putative                                                                       | 0.62  | 6.22    | 10.79   |
| PF3D7_1324600   | conserved Plasmodium protein, unknown function                                                    | 0.65  | 2.70    | 4.80    |
| PF3D7_1324700   | SNARE protein, putative (YKT6.2)                                                                  | -0.87 | 93.00   | 57.39   |
| PF3D7_1324800   | dihydrofolate synthase/folypolyglutamate synthase (DHFS-FPGS)                                     | 0.47  | 21.24   | 33.24   |
| PF3D7_1324900   | L-lactate dehydrogenase (LDH)                                                                     | -1.15 | 2227.95 | 1136.59 |
| PF3D7_1325000   | U6 snRNA-associated Sm-like protein LSM6, putative (LSM6)                                         | -1.39 | 109.03  | 46.98   |
| PF3D7_1325100   | phosphoribosylpyrophosphate synthetase                                                            | -0.72 | 444.11  | 304.06  |
| PF3D7_1325200   | oxidoreductase, putative                                                                          | 0.88  | 6.80    | 14.12   |
| PF3D7_1325300   | conserved Plasmodium protein, unknown function                                                    | -1.60 | 1.88    | 0.67    |
| PF3D7_1325400   | conserved Plasmodium protein, unknown function                                                    | 0.63  | 12.32   | 21.51   |
| PF3D7_1325500   | conserved Plasmodium protein, unknown function                                                    | 0.56  | 2.16    | 3.61    |
| PF3D7_1325600   | mitochondrial fission 1 protein, putative (FIS1)                                                  | 0.24  | 19.61   | 26.17   |
| PF3D7_1325700   | conserved Plasmodium protein, unknown function                                                    | 0.09  | 4.57    | 5.52    |
| PF3D7_1325800   | conserved Plasmodium protein, unknown function                                                    | 0.38  | 3.18    | 4.70    |
| PF3D7_1325900   | conserved Plasmodium protein, unknown function                                                    | 0.34  | 8.99    | 12.81   |
| PF3D7_1326000   | conserved Plasmodium protein, unknown function                                                    | 0.42  | 45.57   | 68.77   |
| PF3D7_1326100   | WD repeat-containing protein, putative                                                            | -0.76 | 27.19   | 18.16   |
| PF3D7_1326200   | conserved Plasmodium protein, unknown function                                                    | -1.34 | 8.53    | 3.79    |
| PF3D7_1326300   | RNA-binding protein, putative                                                                     | -0.51 | 118.66  | 94.08   |
| PF3D7_1326400   | translation initiation factor EIF-2B gamma subunit, putative                                      | -1.99 | 54.74   | 15.53   |
| PF3D7_1326500   | conserved Plasmodium protein, unknown function                                                    | 0.85  | 2.39    | 4.88    |
| PF3D7_1326600   | conserved Plasmodium protein, unknown function                                                    | 0.66  | 5.19    | 9.26    |
| PF3D7_1326700   | conserved Plasmodium protein, unknown function                                                    | -0.87 | 37.40   | 23.10   |
| PF3D7_1326800   | syntxin, Qa-SNARE family (SYN18)                                                                  | -1.08 | 10.39   | 5.56    |
| PF3D7_1326900   | conserved Plasmodium membrane protein, unknown function                                           | -0.48 | 9.30    | 7.55    |
| PF3D7_1327000   | conserved Plasmodium protein, unknown function                                                    | -1.15 | 17.88   | 9.13    |
| PF3D7_1327100   | conserved Plasmodium protein, unknown function                                                    | -0.85 | 0.76    | 0.47    |
| PF3D7_1327200   | ribonuclease P protein subunit RPR2, putative (RPR2)                                              | -1.77 | 59.23   | 19.54   |
| PF3D7_1327300   | conserved Plasmodium protein, unknown function                                                    | 4.24  | 20.78   | 442.53  |

|                 |                                                                    |       |         |         |
|-----------------|--------------------------------------------------------------------|-------|---------|---------|
| PF3D7_1327400   | conserved Plasmodium protein, unknown function                     | 0.20  | 32.65   | 42.50   |
| PF3D7_1327500   | conserved Plasmodium protein, unknown function                     | -0.21 | 4.43    | 4.31    |
| PF3D7_1327600   | nicotinate-nucleotide adenyltransferase (NMNAT)                    | 0.84  | 22.40   | 45.35   |
| PF3D7_1327700   | regulator of nonsense transcripts 3B, putative (UPF3B)             | -1.41 | 43.43   | 18.46   |
| PF3D7_1327800   | ribose-phosphate pyrophosphokinase, putative                       | -1.13 | 70.69   | 36.41   |
| PF3D7_1327900   | conserved Plasmodium protein, unknown function                     | -1.96 | 0.11    | 0.00    |
| PF3D7_1328000   | conserved Plasmodium protein, unknown function                     | 0.24  | 6.70    | 8.96    |
| PF3D7_1328100   | proteasome subunit beta type-7, putative                           | -0.06 | 166.22  | 179.94  |
| PF3D7_1328200   | conserved Plasmodium protein, unknown function                     | 0.87  | 6.63    | 13.71   |
| PF3D7_1328300   | conserved Plasmodium protein, unknown function                     | 0.86  | 104.96  | 215.76  |
| PF3D7_1328400   | conserved Plasmodium protein, unknown function                     | 0.49  | 4.66    | 7.39    |
| PF3D7_1328500   | alpha/beta-hydrolase, putative                                     | 0.86  | 59.48   | 121.89  |
| PF3D7_1328600   | conserved Plasmodium protein, unknown function                     | 1.97  | 1.78    | 8.00    |
| PF3D7_1328700   | Plasmodium RNA of unknown function RUF1                            | 0.11  | 8.68    | 10.62   |
| PF3D7_1328800   | transcriptional regulatory protein sir2a (SIR2A)                   | 0.58  | 55.73   | 93.85   |
| PF3D7_1328900   | conserved Plasmodium protein, unknown function                     | -1.08 | 9.83    | 5.24    |
| PF3D7_1329000   | DNA-directed RNA polymerase 3 largest subunit                      | -0.87 | 57.61   | 35.58   |
| PF3D7_1329100   | myosin C (MyoC)                                                    | 0.95  | 33.49   | 73.01   |
| PF3D7_1329200   | conserved Plasmodium protein, unknown function                     | 0.55  | 13.00   | 21.46   |
| PF3D7_1329300   | chromatin assembly factor 1 subunit, putative                      | 0.23  | 29.44   | 39.04   |
| PF3D7_1329400   | AMP deaminase, putative                                            | -0.29 | 21.92   | 20.30   |
| PF3D7_1329500   | conserved Plasmodium protein, unknown function                     | -1.98 | 746.90  | 213.72  |
| PF3D7_1329600   | conserved Plasmodium protein, unknown function                     | -1.39 | 92.94   | 39.91   |
| PF3D7_1329700   | apicoplast calcium binding protein 1 (ACBP1)                       | 2.41  | 4.12    | 24.79   |
| PF3D7_1329800   | conserved Plasmodium protein, unknown function                     | 1.52  | 1.32    | 4.27    |
| PF3D7_1329900   | conserved Plasmodium protein, unknown function                     | 0.84  | 1.12    | 2.28    |
| PF3D7_1330000.1 | thioredoxin, putative                                              | -1.10 | 31.56   | 16.67   |
| PF3D7_1330000.2 | thioredoxin, putative                                              | -1.12 | 31.73   | 16.47   |
| PF3D7_1330100   | conserved Plasmodium protein, unknown function                     | -0.29 | 15.37   | 14.21   |
| PF3D7_1330200   | conserved Plasmodium protein, unknown function                     | 0.00  | 19.51   | 22.09   |
| PF3D7_1330300   | DnaJ protein, putative                                             | 0.07  | 15.74   | 18.65   |
| PF3D7_1330400.1 | ER lumen protein retaining receptor 1, putative                    | -1.13 | 234.00  | 120.91  |
| PF3D7_1330400.2 | ER lumen protein retaining receptor 1, putative                    | -1.14 | 224.99  | 115.18  |
| PF3D7_1330500   | conserved Plasmodium protein, unknown function                     | 1.23  | 12.50   | 33.15   |
| PF3D7_1330600   | elongation factor Tu, putative                                     | 1.04  | 14.64   | 34.01   |
| PF3D7_1330700   | GPI transamidase subunit PIG-U, putative                           | 0.59  | 4.09    | 6.97    |
| PF3D7_1330800   | conserved Plasmodium protein, unknown function                     | 0.27  | 363.84  | 494.39  |
| PF3D7_1330900   | small nucleolar RNA snoR17                                         | 0.62  | 0.00    | 0.24    |
| PF3D7_1331000   | protein kinase, putative                                           | 1.61  | 5.94    | 20.49   |
| PF3D7_1331100   | DEAD box helicase, putative                                        | -0.54 | 50.76   | 39.52   |
| PF3D7_1331200   | conserved Plasmodium protein, unknown function                     | -1.18 | 57.68   | 28.74   |
| PF3D7_1331300   | signal peptidase 21 kDa subunit (SP21)                             | 1.10  | 30.71   | 74.27   |
| PF3D7_1331400   | CPW-WPC family protein                                             | 2.78  | 3.80    | 29.57   |
| PF3D7_1331500   | conserved Plasmodium protein, unknown function                     | 2.47  | 10.35   | 64.77   |
| PF3D7_1331600   | protein tyrosine phosphatase-like protein, putative (PTPLA)        | 0.41  | 27.06   | 40.68   |
| PF3D7_1331700   | glutamine--tRNA ligase, putative                                   | -1.66 | 155.09  | 55.27   |
| PF3D7_1331800   | 60S ribosomal protein L23, putative                                | -1.17 | 1469.10 | 737.34  |
| PF3D7_1331900   | small nucleolar RNA snoR18                                         | -0.89 | 586.87  | 357.32  |
| PF3D7_1332000   | syntaxin, Qa-SNARE family (SYN5)                                   | 0.00  | 67.83   | 76.37   |
| PF3D7_1332100   | conserved Plasmodium membrane protein, unknown function            | 0.32  | 7.58    | 10.72   |
| PF3D7_1332200   | conserved Plasmodium protein, unknown function                     | 2.14  | 52.33   | 260.60  |
| PF3D7_1332300   | trafficking protein particle complex subunit 2, putative (TRAPPC2) | -0.08 | 28.77   | 30.66   |
| PF3D7_1332400   | nucleotidyltransferase, putative                                   | -0.39 | 52.01   | 44.89   |
| PF3D7_1332500   | SAM-dependent RNA methyltransferase, putative                      | -0.84 | 182.03  | 114.84  |
| PF3D7_1332600   | apurinic/aprimidinic endonuclease Apn1, putative (APN1)            | 0.80  | 20.96   | 41.14   |
| PF3D7_1332700   | DEAD/DEAH box ATP-dependent RNA helicase, putative                 | -1.28 | 135.23  | 62.71   |
| PF3D7_1332800   | translation initiation factor 6, putative                          | -0.97 | 134.61  | 77.65   |
| PF3D7_1332900   | isoleucine--tRNA ligase, putative                                  | -1.38 | 158.65  | 69.06   |
| PF3D7_1333000   | 20 kDa chaperonin (CPN20)                                          | -0.36 | 62.50   | 55.03   |
| PF3D7_1333100   | conserved Plasmodium protein, unknown function                     | 1.11  | 0.38    | 0.93    |
| PF3D7_1333200   | ubiquitin-activating enzyme (UBA1)                                 | -0.08 | 12.35   | 13.23   |
| PF3D7_1333300   | transmembrane protein Tmp21 homologue, putative                    | -1.26 | 94.35   | 44.34   |
| PF3D7_1333400   | conserved protein, unknown function                                | -1.15 | 127.40  | 64.78   |
| PF3D7_1333500   | conserved Plasmodium protein, unknown function                     | 0.51  | 5.38    | 8.66    |
| PF3D7_1333600   | U3 small nucleolar RNA-associated protein 4, putative (UTP4)       | -1.23 | 64.04   | 30.78   |
| PF3D7_1333700   | histone H3-like centromeric protein CSE4 (CenH3)                   | 0.48  | 74.45   | 117.59  |
| PF3D7_1333800   | conserved Plasmodium protein, unknown function                     | 0.00  | 60.69   | 68.67   |
| PF3D7_1333900   | conserved Plasmodium protein, unknown function                     | 0.05  | 3.24    | 3.77    |
| PF3D7_1334000   | conserved Plasmodium protein, unknown function                     | 0.34  | 4.34    | 6.19    |
| PF3D7_1334100   | conserved Plasmodium protein, unknown function                     | 0.34  | 10.21   | 14.56   |
| PF3D7_1334200   | chaperone binding protein, putative                                | -1.09 | 83.67   | 44.25   |
| PF3D7_1334300   | MSP7-like protein (MSRP5)                                          | 2.30  | 8.47    | 47.10   |
| PF3D7_1334400   | MSP7-like protein (MSRP4)                                          | 0.61  | 3.03    | 5.24    |
| PF3D7_1334500   | MSP7-like protein (MSRP6)                                          | 0.92  | 6.07    | 12.98   |
| PF3D7_1334600   | MSP7-like protein (MSRP3)                                          | -0.07 | 15.71   | 16.90   |
| PF3D7_1334700   | MSP7-like protein (MSRP7)                                          | -1.05 | 310.17  | 168.88  |
| PF3D7_1334800   | MSP7-like protein (MSRP2)                                          | 0.10  | 31.30   | 37.87   |
| PF3D7_1334900   | MSP7-like protein, fragment, pseudogene                            | 0.33  | 22.72   | 32.35   |
| PF3D7_1335000   | MSP7-like protein (MSRP1)                                          | 0.77  | 2.76    | 5.34    |
| PF3D7_1335100   | merozoite surface protein 7 (MSP7)                                 | 1.92  | 342.89  | 1461.63 |
| PF3D7_1335200   | reticulocyte binding protein homologue 6, pseudogene (RH6)         | 4.60  | 0.23    | 6.38    |
| PF3D7_1335300   | reticulocyte binding protein 2 homologue b (RH2b)                  | 3.50  | 22.03   | 280.77  |
| PF3D7_1335400   | reticulocyte binding protein 2 homologue a (RH2a)                  | 3.71  | 32.50   | 480.71  |
| PF3D7_1335500   | conserved Plasmodium protein, unknown function                     | 1.62  | 0.41    | 1.46    |
| PF3D7_1335600   | conserved Plasmodium protein, unknown function                     | -1.60 | 16.27   | 6.07    |
| PF3D7_1335700   | conserved Plasmodium protein, unknown function                     | 0.15  | 9.81    | 12.34   |
| PF3D7_1335800   | conserved Plasmodium protein, unknown function                     | 0.58  | 10.01   | 16.92   |
| PF3D7_1335900   | thrombospondin-related anonymous protein (TRAP)                    | 0.22  | 2.80    | 3.68    |
| PF3D7_1336000   | conserved Plasmodium protein, unknown function                     | -2.02 | 55.94   | 15.61   |
| PF3D7_1336100   | conserved Plasmodium protein, unknown function                     | 0.34  | 4.59    | 6.58    |
| PF3D7_1336200   | conserved Plasmodium protein, unknown function                     | 1.12  | 15.01   | 36.89   |
| PF3D7_1336300   | conserved Plasmodium membrane protein, unknown function            | 0.82  | 0.46    | 0.94    |
| PF3D7_1336400   | RanBPM and CLTH-like protein, putative                             | 0.36  | 10.82   | 15.68   |
| PF3D7_1336500   | small nucleolar RNA snoR19                                         | 0.66  | 4.11    | 7.56    |
| PF3D7_1336600   | conserved Plasmodium protein, unknown function                     | 0.37  | 10.55   | 15.47   |
| PF3D7_1336700   | conserved Plasmodium protein, unknown function                     | -0.21 | 377.79  | 369.46  |
| PF3D7_1336800   | nuclear movement protein, putative (NUDC)                          | -1.22 | 101.62  | 49.24   |
| PF3D7_1336900   | tryptophan--tRNA ligase (WRS)                                      | -1.09 | 46.46   | 24.69   |



|               |                                                              |       |         |         |
|---------------|--------------------------------------------------------------|-------|---------|---------|
| PF3D7_1337000 | endopeptidase, putative                                      | -0.06 | 3.91    | 4.25    |
| PF3D7_1337100 | protein kinase 6 (PK6)                                       | 0.94  | 4.22    | 9.15    |
| PF3D7_1337200 | 1-deoxy-D-xylulose 5-phosphate synthase (DXS)                | -0.53 | 18.43   | 14.41   |
| PF3D7_1337300 | exoribonuclease, putative                                    | -1.47 | 54.53   | 22.25   |
| PF3D7_1337400 | conserved Plasmodium protein, unknown function               | -1.28 | 80.83   | 37.50   |
| PF3D7_1337500 | conserved Plasmodium protein, unknown function               | -1.74 | 109.05  | 36.83   |
| PF3D7_1337600 | tRNA Serine                                                  | -0.38 | 0.00    | 0.00    |
| PF3D7_1337700 | conserved Plasmodium protein, unknown function               | 0.58  | 15.93   | 26.84   |
| PF3D7_1337800 | calcium-dependent protein kinase 5 (CDPK5)                   | 4.39  | 9.26    | 219.18  |
| PF3D7_1337900 | conserved Plasmodium protein, unknown function               | -0.95 | 44.09   | 25.72   |
| PF3D7_1338000 | conserved Plasmodium membrane protein, unknown function      | 0.75  | 16.35   | 31.14   |
| PF3D7_1338100 | 26S proteasome regulatory subunit RPN3, putative (RPN3)      | -0.20 | 160.56  | 158.13  |
| PF3D7_1338200 | 60S ribosomal protein L6-2, putative                         | -0.86 | 1221.29 | 760.04  |
| PF3D7_1338300 | elongation factor 1-gamma, putative                          | -1.12 | 724.89  | 375.84  |
| PF3D7_1338400 | conserved Plasmodium protein, unknown function               | 1.07  | 4.39    | 10.45   |
| PF3D7_1338500 | conserved Plasmodium protein, unknown function               | 0.29  | 1.13    | 1.56    |
| PF3D7_1338600 | conserved Plasmodium protein, unknown function               | 2.00  | 26.40   | 119.09  |
| PF3D7_1338700 | conserved Plasmodium protein, unknown function               | 0.59  | 31.71   | 53.91   |
| PF3D7_1338800 | CPW-WPC family protein                                       | 1.68  | 1.64    | 5.97    |
| PF3D7_1338900 | serine/threonine protein kinase, putative                    | 0.83  | 8.00    | 16.01   |
| PF3D7_1339000 | probable protein, unknown function                           | 2.16  | 0.38    | 2.11    |
| PF3D7_1339100 | tRNA Methionine                                              | 3.53  | 0.00    | 3.79    |
| PF3D7_1339200 | tRNA Proline                                                 | 0.62  | 0.00    | 0.27    |
| PF3D7_1339300 | conserved Plasmodium protein, unknown function               | -0.65 | 511.03  | 367.94  |
| PF3D7_1339400 | conserved Plasmodium protein, unknown function               | 0.42  | 20.50   | 30.96   |
| PF3D7_1339500 | mitochondrial ribosomal protein L49 precursor, putative      | 0.04  | 0.93    | 1.10    |
| PF3D7_1339600 | conserved Plasmodium protein, unknown function               | 0.13  | 5.97    | 7.38    |
| PF3D7_1339700 | conserved Plasmodium protein, unknown function               | 0.80  | 14.27   | 28.00   |
| PF3D7_1339800 | mitotic-spindle organizing protein 1, putative               | -0.10 | 4.70    | 4.98    |
| PF3D7_1339900 | ABC transporter B family member 5, putative (ABCB5)          | 0.49  | 4.57    | 7.28    |
| PF3D7_1340000 | secreted ookinete protein, putative (PSOP7)                  | -0.72 | 11.68   | 7.99    |
| PF3D7_1340100 | exosome complex component RRP42, putative (RRP42)            | -0.91 | 42.02   | 25.17   |
| PF3D7_1340200 | conserved Plasmodium protein, unknown function               | -3.18 | 1.65    | 0.11    |
| PF3D7_1340300 | nucleolar complex protein 2, putative                        | -1.25 | 135.14  | 64.22   |
| PF3D7_1340400 | conserved Plasmodium protein, unknown function               | 0.65  | 0.43    | 0.77    |
| PF3D7_1340500 | conserved Plasmodium protein, unknown function               | -0.38 | 7.27    | 6.32    |
| PF3D7_1340600 | RNA lariat debranching enzyme, putative (DBR1)               | -0.55 | 98.56   | 76.10   |
| PF3D7_1340700 | ras-related protein Rab-11B (RAB11b)                         | 0.62  | 26.30   | 45.73   |
| PF3D7_1340800 | mitochondrial pyruvate carrier protein 1, putative (MPC1)    | 0.54  | 16.40   | 27.02   |
| PF3D7_1340900 | sodium-dependent phosphate transporter (PIT)                 | -1.23 | 532.87  | 256.74  |
| PF3D7_1341000 | tRNA Arginine                                                | 0.62  | 0.00    | 0.26    |
| PF3D7_1341100 | U6 spliceosomal RNA                                          | -0.01 | 1.24    | 1.44    |
| PF3D7_1341200 | 60S ribosomal protein L18, putative                          | -1.07 | 1296.07 | 697.68  |
| PF3D7_1341300 | 60S ribosomal protein L18-2, putative                        | -0.59 | 934.15  | 700.75  |
| PF3D7_1341400 | small nucleolar RNA snoR20                                   | -0.81 | 299.04  | 192.95  |
| PF3D7_1341500 | inner membrane complex suture component, putative (ISC1)     | 1.38  | 8.65    | 25.46   |
| PF3D7_1341600 | GPI mannosyltransferase 3 (GPI10)                            | 0.36  | 3.04    | 4.40    |
| PF3D7_1341700 | conserved Plasmodium protein, unknown function               | 1.85  | 0.14    | 0.80    |
| PF3D7_1341800 | inner membrane complex protein 1k, putative (IMC1k)          | 1.36  | 13.08   | 37.87   |
| PF3D7_1341900 | V-type proton ATPase subunit D, putative                     | -0.48 | 98.48   | 79.66   |
| PF3D7_1342000 | 40S ribosomal protein S6                                     | -0.81 | 1335.44 | 859.16  |
| PF3D7_1342100 | aconitate hydratase (IRP)                                    | 0.09  | 49.39   | 59.19   |
| PF3D7_1342200 | conserved Plasmodium membrane protein, unknown function      | 2.42  | 0.32    | 1.99    |
| PF3D7_1342300 | tetratricopeptide repeat family protein, putative            | 0.73  | 7.89    | 14.81   |
| PF3D7_1342400 | casein kinase II beta chain (CK2beta2)                       | -0.60 | 217.90  | 162.66  |
| PF3D7_1342500 | sporozoite protein essential for cell traversal (SPECT1)     | 3.46  | 1.43    | 18.06   |
| PF3D7_1342600 | myosin A (MyoA)                                              | 4.54  | 42.00   | 1106.42 |
| PF3D7_1342700 | transcription activator, putative                            | -1.22 | 39.74   | 19.27   |
| PF3D7_1342800 | phosphoenolpyruvate carboxykinase (PEPCK)                    | 0.63  | 25.00   | 43.79   |
| PF3D7_1342900 | transcription factor with AP2 domain(s) (ApiAP2)             | -0.92 | 19.09   | 11.42   |
| PF3D7_1343000 | phosphoethanolamine N-methyltransferase (PMT)                | -0.71 | 1874.75 | 1294.25 |
| PF3D7_1343100 | conserved Plasmodium protein, unknown function               | -0.19 | 56.76   | 56.05   |
| PF3D7_1343200 | tRNA guanosine-2'-O-methyltransferase, putative              | -0.67 | 62.73   | 44.50   |
| PF3D7_1343300 | conserved Plasmodium protein, unknown function               | 0.60  | 41.57   | 71.29   |
| PF3D7_1343400 | DNA repair protein RAD5, putative (RAD5)                     | -1.54 | 30.60   | 11.89   |
| PF3D7_1343500 | conserved Plasmodium protein, unknown function               | 0.18  | 11.59   | 14.79   |
| PF3D7_1343600 | UDP-N-acetylglucosamine pyrophosphorylase, putative          | -0.02 | 4.95    | 5.50    |
| PF3D7_1343700 | kelch protein K13 (K13)                                      | -0.48 | 189.07  | 152.60  |
| PF3D7_1343800 | conserved Plasmodium protein, unknown function               | 2.16  | 4.49    | 22.73   |
| PF3D7_1343900 | U4/U6 small nuclear ribonucleoprotein PRP4, putative (PRPF4) | -1.20 | 33.95   | 16.66   |
| PF3D7_1344000 | aminomethyltransferase, putative                             | 0.38  | 4.20    | 6.17    |
| PF3D7_1344100 | krox-like protein, putative                                  | 0.50  | 25.54   | 40.72   |
| PF3D7_1344200 | heat shock protein 110, putative (HSP110)                    | -1.26 | 337.69  | 159.36  |
| PF3D7_1344300 | conserved protein, unknown function                          | 0.95  | 46.83   | 102.52  |
| PF3D7_1344400 | conserved Plasmodium protein, unknown function               | -0.90 | 10.92   | 6.59    |
| PF3D7_1344500 | U6 snRNA phosphodiesterase, putative (USB1)                  | 0.47  | 12.98   | 20.39   |
| PF3D7_1344600 | lipoyl synthase (LipA)                                       | 1.05  | 6.14    | 14.41   |
| PF3D7_1344700 | conserved Plasmodium protein, unknown function               | -1.08 | 33.78   | 18.02   |
| PF3D7_1344800 | aspartate carbamoyltransferase (ATCase)                      | -0.45 | 59.10   | 48.81   |
| PF3D7_1344900 | conserved Plasmodium protein, unknown function               | -1.71 | 98.68   | 34.14   |
| PF3D7_1345000 | conserved Plasmodium protein, unknown function               | -0.65 | 4.39    | 3.16    |
| PF3D7_1345100 | thioredoxin 2 (TRX2)                                         | -0.78 | 93.99   | 61.72   |
| PF3D7_1345200 | rhomboid protease ROM6, putative (ROM6)                      | -0.18 | 10.60   | 10.57   |
| PF3D7_1345300 | conserved Plasmodium protein, unknown function               | 1.52  | 4.57    | 14.98   |
| PF3D7_1345400 | conserved Plasmodium protein, unknown function               | 0.94  | 11.68   | 25.32   |
| PF3D7_1345500 | ubiquitin-conjugating enzyme E2 (UBC)                        | -0.19 | 8.54    | 8.45    |
| PF3D7_1345600 | inner membrane complex protein                               | 1.19  | 39.28   | 101.30  |
| PF3D7_1345700 | isocitrate dehydrogenase [NADP], mitochondrial (IDH)         | 0.14  | 61.91   | 77.28   |
| PF3D7_1345800 | conserved Plasmodium protein, unknown function               | -1.42 | 42.79   | 18.05   |
| PF3D7_1345900 | kinetochore protein SPC25, putative (SPC25)                  | 0.52  | 16.48   | 26.65   |
| PF3D7_1346000 | dynactin subunit 2, putative                                 | -0.28 | 2.54    | 2.37    |
| PF3D7_1346100 | protein transport protein SEC61 subunit alpha (SEC61)        | -1.05 | 374.73  | 204.57  |
| PF3D7_1346200 | nuclear import protein MOG1, putative                        | -1.04 | 12.77   | 7.00    |
| PF3D7_1346300 | DNA/RNA-binding protein Alba 2 (ALBA2)                       | -1.10 | 1337.08 | 704.96  |
| PF3D7_1346400 | conserved Plasmodium protein, unknown function               | 0.04  | 57.00   | 66.02   |
| PF3D7_1346500 | conserved Plasmodium protein, unknown function               | -1.38 | 47.24   | 20.49   |
| PF3D7_1346600 | conserved Plasmodium protein, unknown function               | 0.06  | 3.80    | 4.48    |
| PF3D7_1346700 | 6-cysteine protein (P48/45)                                  | 1.43  | 1.80    | 5.48    |

|                 |                                                                                 |       |         |         |
|-----------------|---------------------------------------------------------------------------------|-------|---------|---------|
| PF3D7_1346800   | 6-cysteine protein (P47)                                                        | 1.43  | 0.29    | 0.92    |
| PF3D7_1346900   | conserved Plasmodium protein, unknown function                                  | -0.14 | 21.13   | 21.68   |
| PF3D7_1347000   | WD repeat-containing protein 92, putative (WDR92)                               | 0.95  | 1.83    | 4.00    |
| PF3D7_1347100   | DNA topoisomerase 3, putative (TOP3)                                            | 0.60  | 9.09    | 15.56   |
| PF3D7_1347200   | nucleoside transporter 1 (NT1)                                                  | -0.64 | 711.88  | 515.72  |
| PF3D7_1347300   | conserved Plasmodium membrane protein, unknown function                         | -0.86 | 9.16    | 5.70    |
| PF3D7_1347400   | conserved Plasmodium protein, unknown function                                  | -2.64 | 20.48   | 3.67    |
| PF3D7_1347500   | DNA/RNA-binding protein Alba 4 (ALBA4)                                          | -0.89 | 2119.84 | 1291.80 |
| PF3D7_1347600   | conserved Plasmodium protein, unknown function                                  | 0.38  | 2.87    | 4.25    |
| PF3D7_1347700   | ethanolamine-phosphate cytidyltransferase (ECT)                                 | -0.10 | 211.29  | 222.54  |
| PF3D7_1347800   | leucine-rich repeat protein (LRR4.1)                                            | 0.80  | 1.19    | 2.38    |
| PF3D7_1347900   | conserved Plasmodium protein, unknown function                                  | 0.97  | 1.98    | 4.37    |
| PF3D7_1348000   | conserved Plasmodium protein, unknown function                                  | 0.47  | 2.48    | 3.89    |
| PF3D7_1348100   | GTPase, putative                                                                | 0.42  | 11.42   | 17.27   |
| PF3D7_1348200   | step II splicing factor, putative                                               | -1.32 | 38.90   | 17.59   |
| PF3D7_1348300   | elongation factor Tu, putative                                                  | -2.31 | 35.26   | 8.03    |
| PF3D7_1348400   | conserved Plasmodium membrane protein, unknown function                         | 0.07  | 5.64    | 6.71    |
| PF3D7_1348500   | TBC domain protein, putative                                                    | 0.34  | 20.96   | 30.08   |
| PF3D7_1348600   | conserved Plasmodium protein, unknown function                                  | 1.05  | 19.25   | 45.06   |
| PF3D7_1348700   | WD repeat-containing protein 16, putative (WDR16)                               | 1.07  | 0.89    | 2.12    |
| PF3D7_1348800   | E1-E2 ATPase, putative                                                          | 1.61  | 0.50    | 1.75    |
| PF3D7_1348900   | conserved Plasmodium protein, unknown function                                  | -0.03 | 21.96   | 24.36   |
| PF3D7_1349000   | conserved Plasmodium protein, unknown function                                  | -0.38 | 0.33    | 0.29    |
| PF3D7_1349100   | nucleoside diphosphate hydrolase, putative                                      | -0.27 | 18.31   | 17.18   |
| PF3D7_1349200   | glutamate--tRNA ligase, putative                                                | -1.38 | 206.40  | 89.51   |
| PF3D7_1349300   | tyrosine kinase-like protein (TKL3)                                             | -0.68 | 24.95   | 17.53   |
| PF3D7_1349400   | cytidine and deoxycytidylate deaminase, putative                                | -1.77 | 39.77   | 13.19   |
| PF3D7_1349500   | conserved Plasmodium protein, unknown function                                  | -0.52 | 39.42   | 31.02   |
| PF3D7_1349600   | conserved Plasmodium protein, unknown function                                  | 0.88  | 18.91   | 39.36   |
| PF3D7_1349700   | peptidase, putative                                                             | -0.76 | 39.02   | 26.04   |
| PF3D7_1349800   | nucleolar preribosomal associated cytoplasmic ATPase, putative                  | -1.63 | 37.45   | 13.61   |
| PF3D7_1349900   | conserved Plasmodium protein, unknown function                                  | 0.37  | 3.63    | 5.32    |
| PF3D7_1350000   | conserved Plasmodium protein, unknown function                                  | 0.64  | 0.95    | 1.70    |
| PF3D7_1350100   | lysine--tRNA ligase (KRS1)                                                      | -0.76 | 209.86  | 140.25  |
| PF3D7_1350200   | small nuclear ribonucleoprotein E, putative (SNRPE)                             | -1.69 | 43.85   | 15.27   |
| PF3D7_1350300   | conserved Plasmodium protein, unknown function                                  | -1.49 | 46.24   | 18.64   |
| PF3D7_1350400   | ubiquitin-activating enzyme E1, putative                                        | -0.08 | 3.93    | 4.20    |
| PF3D7_1350500   | conserved Plasmodium protein, unknown function                                  | -1.14 | 96.56   | 49.57   |
| PF3D7_1350600   | conserved Plasmodium protein, unknown function                                  | -0.31 | 6.38    | 5.80    |
| PF3D7_1350700   | N6-adenine-specific methylase, putative                                         | 0.87  | 6.18    | 12.81   |
| PF3D7_1350800   | conserved Plasmodium protein, unknown function                                  | 0.76  | 2.78    | 5.34    |
| PF3D7_1350900   | transcription factor with AP2 domain(s) (ApiAP2)                                | -1.01 | 11.66   | 6.52    |
| PF3D7_1351000   | phosphatidylinositol transfer protein, putative                                 | -0.65 | 81.55   | 58.53   |
| PF3D7_1351100   | conserved protein, unknown function                                             | -1.30 | 76.57   | 35.05   |
| PF3D7_1351200   | conserved Plasmodium protein, unknown function                                  | -1.58 | 18.93   | 7.15    |
| PF3D7_1351300   | conserved Plasmodium membrane protein, unknown function                         | -0.05 | 0.62    | 0.68    |
| PF3D7_1351400   | 60S ribosomal protein L17, putative                                             | -0.94 | 1420.03 | 833.24  |
| PF3D7_1351500   | small nucleolar RNA snoR21                                                      | -0.92 | 134.09  | 79.98   |
| PF3D7_1351600   | glycerol kinase (GK)                                                            | 2.32  | 8.46    | 47.76   |
| PF3D7_1351700   | inner membrane complex protein 1f, putative (IMC1f)                             | 2.87  | 37.33   | 307.38  |
| PF3D7_1351800.1 | conserved Plasmodium protein, unknown function                                  | -1.13 | 88.34   | 45.45   |
| PF3D7_1351800.2 | conserved Plasmodium protein, unknown function                                  | -1.13 | 86.72   | 44.82   |
| PF3D7_1351900   | conserved Plasmodium protein, unknown function                                  | -1.45 | 102.16  | 42.24   |
| PF3D7_1352000   | conserved Plasmodium protein, unknown function                                  | 0.09  | 5.22    | 6.29    |
| PF3D7_1352100   | ABC transporter B family member 6, putative (ABCB6)                             | -0.24 | 33.66   | 32.14   |
| PF3D7_1352200   | U3 small nucleolar RNA-associated protein 15, putative (UTP15)                  | -1.01 | 111.24  | 62.43   |
| PF3D7_1352300   | conserved Plasmodium protein, unknown function                                  | -1.28 | 5.28    | 2.45    |
| PF3D7_1352400   | conserved Plasmodium protein, unknown function                                  | -1.86 | 32.81   | 10.19   |
| PF3D7_1352500   | thioredoxin-related protein, putative                                           | -0.36 | 320.67  | 281.44  |
| PF3D7_1352600   | protein kinase, putative                                                        | -1.96 | 0.41    | 0.11    |
| PF3D7_1352700   | P-loop containing nucleoside triphosphate hydrolase, putative                   | -1.76 | 57.13   | 19.06   |
| PF3D7_1352800   | vacuolar fusion protein MON1, putative                                          | -0.80 | 25.27   | 16.44   |
| PF3D7_1352900   | Plasmodium exported protein, unknown function                                   | -1.49 | 374.19  | 150.36  |
| PF3D7_1353000   | tryptophan-rich antigen, pseudogene                                             | 0.23  | 236.66  | 313.61  |
| PF3D7_1353100   | Plasmodium exported protein, unknown function                                   | -2.33 | 1144.24 | 256.67  |
| PF3D7_1353200   | membrane associated histidine-rich protein (MAHRP2)                             | -1.86 | 1905.21 | 592.15  |
| PF3D7_1353300   | conserved Plasmodium protein, unknown function                                  | 0.05  | 27.50   | 32.07   |
| PF3D7_1353400   | Ran-binding protein, putative                                                   | -1.51 | 47.46   | 18.78   |
| PF3D7_1353500   | RNA polymerase II transcription factor B subunit 4, putative (TFB4)             | -0.50 | 11.28   | 9.02    |
| PF3D7_1353600   | ER lumen protein retaining receptor (ERD2)                                      | -1.02 | 125.86  | 70.24   |
| PF3D7_1353700   | reactive oxygen species modulator 1, putative (ROMO1)                           | -0.91 | 23.24   | 13.92   |
| PF3D7_1353800   | proteasome subunit alpha type-4, putative                                       | -0.98 | 91.56   | 52.32   |
| PF3D7_1353900   | proteasome subunit alpha type-7, putative                                       | -0.58 | 146.03  | 110.31  |
| PF3D7_1354000   | conserved Plasmodium protein, unknown function                                  | -0.67 | 0.93    | 0.65    |
| PF3D7_1354100   | conserved Plasmodium protein, unknown function                                  | -0.65 | 4.10    | 2.95    |
| PF3D7_1354200   | inositol-polyphosphate 5-phosphatase, putative (IP5P)                           | -0.05 | 34.46   | 37.60   |
| PF3D7_1354300   | large subunit rRNA methyltransferase, putative                                  | -0.78 | 165.56  | 108.53  |
| PF3D7_1354400   | V-type proton ATPase 21 kDa proteolipid subunit, putative                       | -0.16 | 86.19   | 87.39   |
| PF3D7_1354500   | adenylosuccinate synthetase (ADSS)                                              | -0.81 | 98.16   | 63.27   |
| PF3D7_1354600   | 60S ribosomal protein L7-2, putative                                            | -1.67 | 64.13   | 22.73   |
| PF3D7_1354700   | conserved Plasmodium protein, unknown function                                  | -0.01 | 0.49    | 0.56    |
| PF3D7_1354800   | metacaspase 1 (MCA1)                                                            | -0.45 | 8.95    | 7.39    |
| PF3D7_1354900   | conserved Plasmodium protein, unknown function                                  | -0.61 | 20.56   | 15.21   |
| PF3D7_1355100   | DNA replication licensing factor MCM6 (MCM6)                                    | 0.73  | 51.47   | 96.34   |
| PF3D7_1355200   | RAP protein, putative                                                           | -1.76 | 4.11    | 1.37    |
| PF3D7_1355300   | histone-lysine N-methyltransferase, putative (SET6)                             | -1.77 | 56.75   | 18.84   |
| PF3D7_1355400   | tRNA Threonine                                                                  | -0.38 | 0.31    | 0.27    |
| PF3D7_1355500   | serine/threonine protein phosphatase 5 (PP5)                                    | -1.23 | 90.24   | 43.30   |
| PF3D7_1355600   | conserved Plasmodium protein, unknown function                                  | 0.93  | 2.72    | 5.89    |
| PF3D7_1355700   | NLI interacting factor-like phosphatase, putative (NIF3)                        | -1.46 | 150.13  | 61.48   |
| PF3D7_1355800   | splicing factor 3B subunit 5, putative (SF3B5)                                  | -0.78 | 37.16   | 24.34   |
| PF3D7_1355900   | conserved protein, unknown function                                             | -0.67 | 61.74   | 43.94   |
| PF3D7_1356000   | conserved Plasmodium protein, unknown function                                  | 0.77  | 1.08    | 2.10    |
| PF3D7_1356100   | conserved Plasmodium protein, unknown function                                  | 0.65  | 30.86   | 54.68   |
| PF3D7_1356200   | mitochondrial import inner membrane translocase subunit TIM23, putative (TIM23) | -0.39 | 37.69   | 32.48   |
| PF3D7_1356300   | ubiquitin-conjugating enzyme, putative                                          | 0.81  | 74.67   | 147.92  |
| PF3D7_1356400   | phosphatase 2A regulatory subunit-related protein, putative                     | 0.92  | 4.60    | 9.83    |
| PF3D7_1356500   | conserved Plasmodium protein, unknown function                                  | 0.96  | 0.69    | 1.56    |

|                 |                                                                   |       |         |         |
|-----------------|-------------------------------------------------------------------|-------|---------|---------|
| PF3D7_1356600   | regulator of chromosome condensation, putative                    | -0.87 | 29.87   | 18.42   |
| PF3D7_1356700   | DnaJ protein, putative                                            | -1.44 | 36.32   | 15.15   |
| PF3D7_1356800   | serine/threonine protein kinase, putative (ARK3)                  | 1.85  | 16.15   | 65.94   |
| PF3D7_1356900   | protein kinase 5 (PK5)                                            | -0.08 | 19.87   | 21.20   |
| PF3D7_1357000   | elongation factor 1-alpha                                         | -0.80 | 5288.01 | 3434.69 |
| PF3D7_1357100   | elongation factor 1-alpha                                         | -0.78 | 5192.73 | 3413.01 |
| PF3D7_1357200   | glutamate--tRNA ligase                                            | 0.10  | 7.01    | 8.47    |
| PF3D7_1357300   | dynein light chain, putative                                      | 1.00  | 0.55    | 1.33    |
| PF3D7_1357400   | conserved Plasmodium protein, unknown function                    | 1.40  | 6.27    | 18.69   |
| PF3D7_1357500   | DNA helicase, putative                                            | 0.51  | 18.84   | 30.35   |
| PF3D7_1357600   | conserved Plasmodium protein, unknown function                    | 1.27  | 2.49    | 6.88    |
| PF3D7_1357700   | U3 small nucleolar RNA-associated protein 21, putative (UTP21)    | -1.77 | 99.67   | 33.11   |
| PF3D7_1357800   | T-complex protein 1 subunit delta (CCT4)                          | -1.04 | 350.18  | 191.95  |
| PF3D7_1357900   | pyrroline-5-carboxylate reductase                                 | -0.75 | 64.73   | 43.60   |
| PF3D7_1358000   | patatin-like phospholipase, putative                              | 0.03  | 6.70    | 7.73    |
| PF3D7_1358100   | small subunit rRNA processing factor, putative                    | -0.40 | 164.56  | 140.39  |
| PF3D7_1358200   | conserved Plasmodium protein, unknown function                    | -0.89 | 30.12   | 18.42   |
| PF3D7_1358300   | rhomboid protease ROM7 (ROM7)                                     | -0.32 | 1.51    | 1.37    |
| PF3D7_1358400   | conserved Plasmodium protein, unknown function                    | 1.36  | 8.37    | 24.32   |
| PF3D7_1358500   | zinc finger protein, putative                                     | -1.13 | 31.40   | 16.21   |
| PF3D7_1358600   | zinc finger protein, putative                                     | 1.25  | 12.94   | 34.77   |
| PF3D7_1358700   | HVA22-like protein, putative                                      | -1.01 | 469.86  | 263.58  |
| PF3D7_1358800   | 40S ribosomal protein S15 (RPS15)                                 | -0.88 | 783.50  | 480.81  |
| PF3D7_1358900   | GTP-binding protein, putative                                     | -1.14 | 91.42   | 46.85   |
| PF3D7_1359000   | conserved Plasmodium protein, unknown function                    | -1.61 | 33.32   | 12.35   |
| PF3D7_1359100   | riboflavin kinase / FAD synthase family protein, putative         | -1.38 | 30.36   | 13.14   |
| PF3D7_1359200   | high mobility group protein B4, putative (HMGB4)                  | 0.75  | 17.68   | 33.69   |
| PF3D7_1359300   | exosome complex exonuclease RRP44 (DIS3)                          | -1.12 | 51.82   | 27.00   |
| PF3D7_1359400   | CUGBP Elav-like family member 1 (CELFI1)                          | -1.03 | 334.66  | 184.88  |
| PF3D7_1359500   | conserved Plasmodium protein, unknown function                    | -0.33 | 3.90    | 3.51    |
| PF3D7_1359600   | conserved Plasmodium protein, unknown function                    | 0.22  | 37.59   | 49.50   |
| PF3D7_1359700   | conserved Plasmodium protein, unknown function                    | 1.26  | 3.35    | 9.05    |
| PF3D7_1359800   | ADP-ribosylation factor, putative                                 | 0.49  | 5.42    | 8.60    |
| PF3D7_1359900   | conserved Plasmodium membrane protein, unknown function           | -0.79 | 77.55   | 50.52   |
| PF3D7_1360000   | conserved Plasmodium protein, unknown function                    | -0.30 | 10.40   | 9.56    |
| PF3D7_1360100   | RNA-binding protein, putative                                     | -0.83 | 43.36   | 27.57   |
| PF3D7_1360200   | ER membrane protein complex subunit 3, putative (EMC3)            | -1.52 | 87.72   | 34.50   |
| PF3D7_1360300   | conserved Plasmodium protein, unknown function                    | -0.60 | 1.92    | 1.43    |
| PF3D7_1360400   | conserved Plasmodium protein, unknown function                    | -1.97 | 23.23   | 6.68    |
| PF3D7_1360500   | guanylyl cyclase beta (GCbeta)                                    | 1.15  | 0.96    | 2.40    |
| PF3D7_1360700   | E3 SUMO-protein ligase PIAS, putative (PIAS)                      | -1.02 | 68.86   | 38.45   |
| PF3D7_1360800   | falcilysin (FLN)                                                  | -0.85 | 251.52  | 157.43  |
| PF3D7_1360900   | polyadenylate-binding protein, putative                           | 0.51  | 50.29   | 80.91   |
| PF3D7_1361000   | protein arginine N-methyltransferase 5, putative (PRMT5)          | -1.19 | 27.47   | 13.55   |
| PF3D7_1361100   | protein transport protein Sec24A (SEC24A)                         | -0.99 | 351.67  | 200.15  |
| PF3D7_1361200   | conserved Plasmodium protein, unknown function                    | -0.60 | 58.53   | 43.69   |
| PF3D7_1361300   | conserved Plasmodium protein, unknown function                    | 0.47  | 0.91    | 1.44    |
| PF3D7_1361400   | actin-depolymerizing factor 2 (ADF2)                              | 0.54  | 23.54   | 38.80   |
| PF3D7_1361500.1 | conserved Plasmodium protein, unknown function                    | 1.71  | 38.15   | 141.18  |
| PF3D7_1361500.2 | conserved Plasmodium protein, unknown function                    | 2.01  | 13.33   | 61.02   |
| PF3D7_1361600   | iron-sulfur assembly protein, putative                            | 1.68  | 5.95    | 21.75   |
| PF3D7_1361700   | cytochrome c oxidase subunit 2, putative                          | 0.93  | 24.85   | 53.65   |
| PF3D7_1361800   | conserved Plasmodium protein, unknown function                    | 1.70  | 93.59   | 343.10  |
| PF3D7_1361900   | proliferating cell nuclear antigen 1 (PCNA1)                      | 0.95  | 100.54  | 218.95  |
| PF3D7_1362000   | conserved Plasmodium protein, unknown function                    | 1.08  | 14.67   | 35.05   |
| PF3D7_1362100   | 14-3-3 protein (14-3-3II)                                         | 0.79  | 5.07    | 9.93    |
| PF3D7_1362200   | RuvB-like helicase 3 (RUVB3)                                      | -0.60 | 82.97   | 61.64   |
| PF3D7_1362300   | conserved protein, unknown function                               | -0.72 | 34.58   | 23.66   |
| PF3D7_1362400   | calpain (Pcalp)                                                   | -0.77 | 51.67   | 34.20   |
| PF3D7_1362500   | exonuclease, putative                                             | 0.92  | 1.56    | 3.35    |
| PF3D7_1362600   | conserved Plasmodium protein, unknown function                    | 0.74  | 3.76    | 7.10    |
| PF3D7_1362700   | conserved Plasmodium protein, unknown function                    | 1.50  | 13.13   | 41.97   |
| PF3D7_1362800   | conserved Plasmodium protein, unknown function                    | 0.55  | 5.95    | 9.86    |
| PF3D7_1362900   | conserved Plasmodium protein, unknown function                    | 1.04  | 1.92    | 4.45    |
| PF3D7_1363000   | conserved Plasmodium protein, unknown function                    | -2.13 | 16.97   | 4.36    |
| PF3D7_1363100   | conserved Plasmodium protein, unknown function                    | -0.65 | 7.87    | 5.65    |
| PF3D7_1363200   | bifunctional polynucleotide phosphatase/kinase (PNKP)             | -1.73 | 24.21   | 8.22    |
| PF3D7_1363300   | 50S ribosomal protein L9, mitochondrial, putative                 | -0.30 | 6.72    | 6.19    |
| PF3D7_1363400   | polyubiquitin binding protein, putative (DOA1)                    | -1.27 | 43.33   | 20.27   |
| PF3D7_1363500   | DNase I-like protein, putative                                    | -0.14 | 9.77    | 9.99    |
| PF3D7_1363600   | conserved Plasmodium protein, unknown function                    | 0.27  | 3.05    | 4.16    |
| PF3D7_1363700   | conserved Plasmodium protein, unknown function                    | 1.05  | 4.07    | 9.52    |
| PF3D7_1363800   | nuclear fusion protein, putative (GEX1)                           | 1.05  | 0.76    | 1.78    |
| PF3D7_1363900   | unspecified product                                               | -3.94 | 1.84    | 0.11    |
| PF3D7_1364000   | conserved Plasmodium protein, unknown function                    | -1.10 | 18.30   | 9.63    |
| PF3D7_1364100   | 6-cysteine protein (P92)                                          | -0.18 | 58.07   | 57.90   |
| PF3D7_1364200   | conserved Plasmodium protein, unknown function                    | -0.77 | 56.55   | 37.52   |
| PF3D7_1364300   | pre-mRNA-splicing factor ATP-dependent RNA helicase PRP16 (PRP16) | -1.08 | 52.23   | 27.88   |
| PF3D7_1364400   | conserved Plasmodium protein, unknown function                    | -0.81 | 26.03   | 16.78   |
| PF3D7_1364500   | exosome complex component RRP45, putative (RRP45)                 | -2.12 | 51.92   | 13.52   |
| PF3D7_1364600   | aldehyde reductase, putative                                      | 0.28  | 9.04    | 12.39   |
| PF3D7_1364700   | conserved Plasmodium protein, unknown function, pseudogene        | 0.69  | 0.53    | 0.99    |
| PF3D7_1364800   | DNA-directed RNA polymerase II, putative                          | -1.25 | 162.09  | 76.92   |
| PF3D7_1364900   | ferrochelatase (FC)                                               | -0.62 | 12.74   | 9.37    |
| PF3D7_1365000   | conserved Plasmodium protein, unknown function                    | -0.63 | 21.48   | 15.66   |
| PF3D7_1365100   | mitochondrial ribosomal protein S17 precursor, putative           | -0.30 | 14.74   | 13.50   |
| PF3D7_1365200   | conserved Plasmodium protein, unknown function                    | -1.22 | 49.68   | 24.11   |
| PF3D7_1365300   | conserved Plasmodium protein, unknown function                    | -1.58 | 26.12   | 9.84    |
| PF3D7_1365400   | ubiquitin-activating enzyme (Uba2)                                | -1.30 | 11.60   | 5.31    |
| PF3D7_1365500   | glycine cleavage system T protein, putative (GCVT)                | -0.04 | 19.41   | 21.31   |
| PF3D7_1365600   | DNA topoisomerase VI, b subunit, putative                         | 0.88  | 11.44   | 23.84   |
| PF3D7_1365700   | SNARE associated Golgi protein, putative                          | -0.82 | 83.32   | 53.21   |
| PF3D7_1365800   | conserved Plasmodium protein, unknown function                    | -0.66 | 59.19   | 42.39   |
| PF3D7_1365900   | ubiquitin-60S ribosomal protein L40                               | -0.34 | 846.96  | 757.96  |
| PF3D7_1366000   | conserved Plasmodium protein, unknown function                    | -0.05 | 31.65   | 34.46   |
| PF3D7_1366100   | conserved Plasmodium protein, unknown function                    | 1.00  | 35.41   | 79.84   |
| PF3D7_1366200   | conserved Plasmodium protein, unknown function                    | 1.03  | 16.56   | 38.25   |
| PF3D7_1366300   | conserved Plasmodium protein, unknown function                    | -0.97 | 68.67   | 39.58   |

|               |                                                                               |       |         |         |
|---------------|-------------------------------------------------------------------------------|-------|---------|---------|
| PF3D7_1366400 | rhopty protein RHOP148 (RHOP148)                                              | -0.77 | 65.52   | 43.45   |
| PF3D7_1366500 | nucleoside diphosphate kinase (NDK)                                           | 0.99  | 40.57   | 91.30   |
| PF3D7_1366600 | signal recognition particle receptor alpha subunit (SRPR-alpha)               | 0.39  | 98.67   | 145.97  |
| PF3D7_1366700 | conserved Plasmodium protein, unknown function                                | -0.90 | 6.16    | 3.72    |
| PF3D7_1366800 | phosphatidylserine synthase, putative                                         | -0.17 | 46.28   | 46.31   |
| PF3D7_1366900 | conserved Plasmodium protein, unknown function                                | -1.08 | 532.57  | 284.73  |
| PF3D7_1367000 | suppressor of kinetochore protein 1, putative (SKP1)                          | 0.04  | 41.82   | 48.71   |
| PF3D7_1367100 | U1 small nuclear ribonucleoprotein, putative                                  | -0.82 | 133.38  | 85.59   |
| PF3D7_1367200 | conserved Plasmodium protein, unknown function                                | 0.06  | 0.55    | 0.65    |
| PF3D7_1367300 | conserved Plasmodium protein, unknown function                                | -0.38 | 2.02    | 1.76    |
| PF3D7_1367400 | conserved Plasmodium protein, unknown function                                | -1.38 | 57.40   | 24.85   |
| PF3D7_1367500 | NADH-cytochrome b5 reductase, putative                                        | 0.04  | 28.86   | 33.43   |
| PF3D7_1367600 | ribosome biogenesis protein MRT4, putative                                    | -0.94 | 80.12   | 47.25   |
| PF3D7_1367700 | alanine--tRNA ligase (AlaRS)                                                  | -1.02 | 122.51  | 68.14   |
| PF3D7_1367800 | secreted ookinete protein, putative (PSOP2)                                   | 1.33  | 0.47    | 1.36    |
| PF3D7_1367900 | conserved Plasmodium protein, unknown function                                | 0.44  | 0.77    | 1.19    |
| PF3D7_1368000 | conserved Plasmodium protein, unknown function                                | 0.96  | 1.28    | 2.89    |
| PF3D7_1368100 | 26S proteasome regulatory subunit RPN11, putative (RPN11)                     | -0.23 | 57.24   | 55.08   |
| PF3D7_1368200 | ABC transporter E family member 1, putative (ABCE1)                           | -1.56 | 142.70  | 54.59   |
| PF3D7_1368300 | conserved Plasmodium protein, unknown function                                | -1.01 | 24.53   | 13.72   |
| PF3D7_1368400 | conserved Plasmodium protein, unknown function                                | -0.20 | 43.73   | 43.03   |
| PF3D7_1368500 | conserved Plasmodium protein, unknown function                                | -0.63 | 2.77    | 2.02    |
| PF3D7_1368600 | mitochondrial import inner membrane translocase subunit TIM9, putative (TIM9) | -0.18 | 16.86   | 16.84   |
| PF3D7_1368700 | mitochondrial carrier protein, putative                                       | 0.36  | 17.33   | 25.08   |
| PF3D7_1368800 | DNA repair endonuclease, putative (ERCC4)                                     | 0.68  | 6.00    | 10.90   |
| PF3D7_1368900 | conserved Plasmodium protein, unknown function                                | -0.52 | 88.64   | 69.81   |
| PF3D7_1369000 | glycosylphosphatidylinositol anchor attachment 1 protein, putative (GPA1)     | -0.62 | 19.73   | 14.54   |
| PF3D7_1369100 | conserved Plasmodium protein, unknown function                                | 0.05  | 8.44    | 9.88    |
| PF3D7_1369200 | conserved Plasmodium protein, unknown function                                | -1.60 | 31.51   | 11.74   |
| PF3D7_1369300 | conserved Plasmodium protein, unknown function                                | 1.93  | 1.54    | 6.68    |
| PF3D7_1369400 | conserved Plasmodium protein, unknown function                                | -0.69 | 5.41    | 3.78    |
| PF3D7_1369500 | conserved Plasmodium protein, unknown function                                | -2.19 | 67.81   | 16.84   |
| PF3D7_1369600 | conserved Plasmodium protein, unknown function                                | 0.27  | 8.82    | 12.00   |
| PF3D7_1369700 | U2 small nuclear ribonucleoprotein A', putative                               | -1.42 | 79.93   | 33.63   |
| PF3D7_1369800 | tRNA Arginine                                                                 | -0.84 | 3.03    | 1.84    |
| PF3D7_1369900 | tRNA Tryptophan                                                               | -1.38 | 0.31    | 0.00    |
| PF3D7_1370000 | tRNA Arginine                                                                 | -1.96 | 2.42    | 0.53    |
| PF3D7_1370100 | tRNA Cysteine                                                                 | -1.38 | 1.56    | 0.54    |
| PF3D7_1370200 | tRNA Glycine                                                                  | -1.38 | 0.32    | 0.00    |
| PF3D7_1370300 | membrane associated histidine-rich protein (MAHRP1)                           | -2.65 | 3738.17 | 674.34  |
| PF3D7_1370500 | unspecified product                                                           | 1.03  | 82.42   | 190.40  |
| PF3D7_1370800 | unspecified product                                                           | 1.20  | 31.09   | 80.56   |
| PF3D7_1370900 | unspecified product                                                           | -0.07 | 88.40   | 94.94   |
| PF3D7_1371000 | 18S ribosomal RNA                                                             | 0.87  | 16.06   | 33.26   |
| PF3D7_1371200 | 5.8S ribosomal RNA                                                            | 1.21  | 0.14    | 0.61    |
| PF3D7_1371300 | 28S ribosomal RNA                                                             | 0.30  | 7.77    | 10.83   |
| PF3D7_1371500 | probable protein, unknown function                                            | 1.11  | 1.33    | 3.31    |
| PF3D7_1371600 | erythrocyte binding like protein 1, pseudogene (EBL1)                         | 2.35  | 13.63   | 78.73   |
| PF3D7_1371700 | serine/threonine protein kinase, FIKK family                                  | 0.58  | 10.14   | 17.09   |
| PF3D7_1371800 | Plasmodium exported protein, unknown function                                 | 1.18  | 7.89    | 20.20   |
| PF3D7_1371900 | Plasmodium exported protein, unknown function                                 | 0.16  | 7.11    | 8.96    |
| PF3D7_1372000 | Plasmodium exported protein (PHISTa), unknown function                        | -1.16 | 74.29   | 37.54   |
| PF3D7_1372100 | Plasmodium exported protein (PHISTb), unknown function (GEXP04)               | -0.31 | 1.04    | 0.95    |
| PF3D7_1372200 | histidine-rich protein III (HRPIII)                                           | -1.73 | 5474.06 | 1862.67 |
| PF3D7_1372300 | Plasmodium exported protein (PHIST), unknown function                         | -1.39 | 448.28  | 192.58  |
| PF3D7_1372400 | acyl-CoA synthetase (ACS4)                                                    | 0.56  | 12.54   | 20.84   |
| PF3D7_1372500 | stevor, pseudogene                                                            | 1.05  | 0.62    | 1.48    |
| PF3D7_1372600 | rifin (RIF)                                                                   | 4.32  | 0.00    | 0.59    |
| PF3D7_1372700 | rifin (RIF)                                                                   | 1.62  | 0.04    | 0.20    |
| PF3D7_1372800 | stevor                                                                        | 0.85  | 0.05    | 0.13    |
| PF3D7_1372900 | erythrocyte membrane protein 1 (PfEMP1), exon 2, pseudogene (VAR)             | 2.43  | 0.00    | 0.09    |
| PF3D7_1373000 | rifin (RIF)                                                                   | 1.55  | 0.09    | 0.35    |
| PF3D7_1373100 | rifin (RIF)                                                                   | 3.32  | 0.00    | 0.23    |
| PF3D7_1373200 | Plasmodium exported protein, unknown function, fragment                       | -0.38 | 0.00    | 0.00    |
| PF3D7_1373300 | rifin (RIF)                                                                   | -0.32 | 0.48    | 0.44    |
| PF3D7_1373400 | rifin (RIF)                                                                   | -0.78 | 15.35   | 10.09   |
| PF3D7_1373500 | erythrocyte membrane protein 1, PfEMP1 (VAR)                                  | 0.96  | 5.88    | 12.91   |
| PF3D7_1400100 | erythrocyte membrane protein 1 (PfEMP1), truncated, pseudogene                | 1.77  | 0.32    | 1.26    |
| PF3D7_1400200 | rifin (RIF)                                                                   | -1.38 | 0.23    | 0.09    |
| PF3D7_1400300 | rifin (RIF)                                                                   | 2.62  | 0.00    | 0.13    |
| PF3D7_1400400 | rifin (RIF)                                                                   | 1.69  | 0.09    | 0.38    |
| PF3D7_1400500 | rifin (RIF)                                                                   | 1.74  | 0.04    | 0.23    |
| PF3D7_1400600 | rifin (RIF)                                                                   | 1.26  | 0.16    | 0.48    |
| PF3D7_1400700 | stevor                                                                        | 4.02  | 0.00    | 0.44    |
| PF3D7_1400800 | rifin (RIF)                                                                   | 2.79  | 0.05    | 0.53    |
| PF3D7_1400900 | Plasmodium exported protein (PHISTa), unknown function, pseudogene            | 0.62  | 0.08    | 0.16    |
| PF3D7_1401000 | glycophorin binding protein (GBPH)                                            | 0.00  | 1.19    | 1.35    |
| PF3D7_1401100 | DnaJ protein, putative                                                        | -1.22 | 1212.90 | 588.80  |
| PF3D7_1401200 | Plasmodium exported protein, unknown function                                 | 1.59  | 16.57   | 56.36   |
| PF3D7_1401300 | aminopeptidase, putative                                                      | -0.98 | 14.49   | 8.29    |
| PF3D7_1401400 | early transcribed membrane protein 14.1 (ETRAMP14)                            | -1.45 | 9473.39 | 3906.13 |
| PF3D7_1401500 | lysophospholipase, putative                                                   | -0.27 | 18.83   | 17.68   |
| PF3D7_1401600 | Plasmodium exported protein (PHISTb), unknown function                        | -0.09 | 267.88  | 284.58  |
| PF3D7_1401700 | Plasmodium exported protein, unknown function                                 | 0.96  | 1.79    | 3.98    |
| PF3D7_1401800 | choline kinase (CK)                                                           | -0.01 | 80.68   | 90.69   |
| PF3D7_1401900 | conserved Plasmodium protein, unknown function                                | 3.57  | 3.46    | 46.63   |
| PF3D7_1402000 | conserved Plasmodium protein, unknown function                                | -0.70 | 12.70   | 8.83    |
| PF3D7_1402100 | conserved Plasmodium protein, unknown function                                | -0.82 | 8.86    | 5.66    |
| PF3D7_1402200 | conserved Plasmodium protein, unknown function                                | 0.84  | 86.48   | 175.24  |
| PF3D7_1402300 | 26S proteasome regulatory subunit RPN6 (RPN6)                                 | -1.11 | 115.46  | 60.48   |
| PF3D7_1402400 | U1 small nuclear ribonucleoprotein C, putative                                | -1.27 | 32.98   | 15.42   |
| PF3D7_1402500 | ubiquitin-40S ribosomal protein S27a, putative                                | -1.05 | 655.46  | 356.76  |
| PF3D7_1402600 | small nucleolar RNA snoR22                                                    | -2.44 | 6.48    | 1.17    |
| PF3D7_1402700 | U2 snRNP-associated SURP motif-containing protein, putative (SR140)           | -0.99 | 88.86   | 50.59   |
| PF3D7_1402800 | conserved Plasmodium protein, unknown function                                | -0.19 | 60.27   | 59.57   |
| PF3D7_1402900 | conserved Plasmodium protein, unknown function                                | -0.22 | 5.17    | 5.01    |
| PF3D7_1403000 | conserved Plasmodium protein, unknown function                                | 1.55  | 0.48    | 1.62    |
| PF3D7_1403100 | conserved Plasmodium protein, unknown function                                | 0.41  | 23.77   | 35.78   |

|                 |                                                                      |       |         |        |
|-----------------|----------------------------------------------------------------------|-------|---------|--------|
| PF3D7_1403200   | conserved Plasmodium protein, unknown function                       | 2.62  | 0.79    | 5.65   |
| PF3D7_1403300   | conserved Plasmodium protein, unknown function                       | 0.66  | 0.28    | 0.51   |
| PF3D7_1403400   | conserved Plasmodium protein, unknown function                       | 0.57  | 5.39    | 9.04   |
| PF3D7_1403500   | conserved Plasmodium protein, unknown function                       | 0.52  | 9.31    | 15.08  |
| PF3D7_1403600   | selenoprotein (Sell)                                                 | 0.76  | 25.65   | 49.20  |
| PF3D7_1403700   | translocation associated membrane protein, putative (TRAM)           | 0.56  | 3.82    | 6.35   |
| PF3D7_1403800   | nuclear formin-like protein (MISFIT)                                 | 0.16  | 4.00    | 5.06   |
| PF3D7_1403900   | serine/threonine protein phosphatase CPPED1, putative (CPPED1)       | -0.48 | 30.42   | 24.66  |
| PF3D7_1404000   | DNA-directed RNA polymerase II subunit RPB4, putative (RPB4)         | -0.15 | 4.36    | 4.46   |
| PF3D7_1404100   | cytochrome c, putative                                               | -0.41 | 99.06   | 84.29  |
| PF3D7_1404200   | conserved Plasmodium protein, unknown function                       | 0.36  | 4.73    | 6.90   |
| PF3D7_1404300   | secreted ookinete adhesive protein, putative (SOAP)                  | 1.38  | 2.28    | 6.78   |
| PF3D7_1404400   | mitochondrial ribosomal protein L16 precursor, putative              | 1.34  | 9.35    | 26.81  |
| PF3D7_1404500   | rRNA biogenesis protein RRP5, putative (RRP5)                        | -0.76 | 56.04   | 37.46  |
| PF3D7_1404600.1 | adenylyl cyclase alpha (ACalpha)                                     | 1.15  | 2.22    | 5.60   |
| PF3D7_1404600.2 | adenylyl cyclase alpha (ACalpha)                                     | 1.19  | 2.67    | 6.92   |
| PF3D7_1404600.3 | adenylyl cyclase alpha                                               | 1.16  | 2.35    | 5.96   |
| PF3D7_1404700   | conserved Plasmodium protein, unknown function                       | 3.03  | 4.26    | 39.63  |
| PF3D7_1404800   | conserved Plasmodium protein, unknown function                       | -1.98 | 661.01  | 189.17 |
| PF3D7_1404900   | conserved Plasmodium protein, unknown function                       | 0.25  | 560.29  | 752.60 |
| PF3D7_1405000   | conserved Plasmodium protein, unknown function                       | -0.30 | 23.75   | 21.77  |
| PF3D7_1405100   | GTPase-activating protein, putative                                  | 0.32  | 14.60   | 20.58  |
| PF3D7_1405200   | trafficking protein particle complex subunit 1, putative (BET5)      | -0.19 | 6.04    | 5.99   |
| PF3D7_1405300   | conserved Plasmodium protein, unknown function                       | 0.61  | 5.62    | 9.71   |
| PF3D7_1405400   | DNA mismatch repair protein, putative                                | -0.23 | 3.81    | 3.67   |
| PF3D7_1405500   | COBW domain-containing protein 1, putative (CBWD1)                   | -1.95 | 25.02   | 7.30   |
| PF3D7_1405600   | ribonucleotide reductase small subunit (RNR)                         | 0.71  | 61.20   | 112.71 |
| PF3D7_1405700   | RING zinc finger protein, putative                                   | 0.53  | 21.36   | 34.93  |
| PF3D7_1405800   | ribosome biogenesis protein BOP1, putative (BOP1)                    | -0.55 | 159.52  | 122.92 |
| PF3D7_1405900   | RNA-binding protein, putative                                        | -0.41 | 63.18   | 53.84  |
| PF3D7_1406000   | RNA-binding protein, putative                                        | -0.98 | 29.38   | 16.84  |
| PF3D7_1406100   | conserved Plasmodium protein, unknown function                       | -1.19 | 16.95   | 8.37   |
| PF3D7_1406200   | conserved Plasmodium protein, unknown function                       | -0.77 | 103.86  | 68.64  |
| PF3D7_1406300   | glycerophosphodiester phosphodiesterase (GDPD)                       | 1.71  | 23.47   | 86.63  |
| PF3D7_1406400   | PPR repeat protein (PPR)                                             | 0.38  | 7.32    | 10.76  |
| PF3D7_1406500   | WD repeat-containing protein 65, putative (WDR65)                    | 0.96  | 0.64    | 1.42   |
| PF3D7_1406600   | ATP-dependent Clp protease, putative (ClpC)                          | 0.12  | 15.80   | 19.45  |
| PF3D7_1406700   | vacuolar protein sorting-associated protein 29, putative (VPS29)     | 0.70  | 15.70   | 28.92  |
| PF3D7_1406800   | glideosome associated protein with multiple membrane spans 3 (GAPM3) | 0.62  | 210.56  | 365.19 |
| PF3D7_1406900   | radical SAM protein, putative                                        | 0.96  | 4.32    | 9.52   |
| PF3D7_1407000   | LCCL domain-containing protein (CCp3)                                | 1.31  | 1.21    | 3.41   |
| PF3D7_1407100   | rRNA 2'-O-methyltransferase fibrillar, putative (NOP1)               | -1.07 | 470.46  | 252.52 |
| PF3D7_1407200   | conserved Plasmodium protein, unknown function                       | 0.26  | 42.84   | 57.89  |
| PF3D7_1407300   | pre-mRNA-splicing factor 38B, putative (PRP38B)                      | 0.13  | 154.57  | 191.26 |
| PF3D7_1407400   | conserved Plasmodium protein, unknown function                       | -0.74 | 35.69   | 24.05  |
| PF3D7_1407500   | tRNA m2G10 methyltransferase subunit, putative                       | -1.28 | 44.33   | 20.57  |
| PF3D7_1407600   | conserved Plasmodium protein, unknown function                       | 0.81  | 3.54    | 7.01   |
| PF3D7_1407700   | conserved Plasmodium protein, unknown function                       | 0.76  | 5.60    | 10.74  |
| PF3D7_1407800   | plasmepsin IV (PM4)                                                  | -1.44 | 1129.17 | 471.32 |
| PF3D7_1407900   | plasmepsin I (PM1)                                                   | -1.64 | 894.12  | 323.91 |
| PF3D7_1408000   | plasmepsin II                                                        | -1.02 | 175.33  | 97.87  |
| PF3D7_1408100   | plasmepsin III (HAP)                                                 | -1.49 | 591.53  | 237.55 |
| PF3D7_1408200   | transcription factor with AP2 domain(s) (AP2-G2)                     | -1.53 | 157.02  | 61.57  |
| PF3D7_1408300   | conserved Plasmodium protein, unknown function                       | -0.67 | 2.39    | 1.69   |
| PF3D7_1408400   | DNA repair helicase, putative                                        | -0.32 | 27.18   | 24.58  |
| PF3D7_1408500   | conserved Plasmodium protein, unknown function                       | -1.46 | 77.60   | 31.79  |
| PF3D7_1408600   | 40S ribosomal protein S8e, putative                                  | -0.63 | 1218.68 | 887.60 |
| PF3D7_1408700   | conserved Plasmodium protein, unknown function                       | -1.27 | 49.32   | 23.17  |
| PF3D7_1408800   | conserved Plasmodium protein, unknown function                       | 1.31  | 0.45    | 1.31   |
| PF3D7_1408900   | tRNA-dihydrouridine synthase, putative                               | -1.40 | 34.53   | 14.73  |
| PF3D7_1409000   | WD repeat-containing protein, putative                               | -1.68 | 43.02   | 15.21  |
| PF3D7_1409100   | aldo-keto reductase, putative                                        | 1.01  | 14.10   | 32.13  |
| PF3D7_1409200.1 | conserved Plasmodium protein, unknown function                       | 0.24  | 20.49   | 27.42  |
| PF3D7_1409200.2 | conserved Plasmodium protein, unknown function                       | 0.24  | 21.80   | 29.15  |
| PF3D7_1409300   | DNA damage-inducible protein 1, putative (DDI1)                      | 0.79  | 47.02   | 91.70  |
| PF3D7_1409400   | conserved Plasmodium membrane protein, unknown function              | 1.14  | 111.60  | 278.67 |
| PF3D7_1409500   | conserved Plasmodium protein, unknown function                       | 1.50  | 4.82    | 15.35  |
| PF3D7_1409600   | conserved Plasmodium protein, unknown function                       | -1.35 | 52.00   | 23.03  |
| PF3D7_1409700   | conserved Plasmodium protein, unknown function                       | 0.17  | 1.84    | 2.34   |
| PF3D7_1409800   | CUGBP Elav-like family member 2, putative (CELF2)                    | -0.07 | 10.26   | 11.06  |
| PF3D7_1409900   | cytidine diphosphate-diacylglycerol synthase (CDS)                   | -0.44 | 69.98   | 58.38  |
| PF3D7_1410000   | ER membrane protein complex subunit 2, putative (EMC2)               | -2.16 | 94.52   | 23.81  |
| PF3D7_1410100   | alpha/beta hydrolase, putative                                       | -0.24 | 2.43    | 2.32   |
| PF3D7_1410200   | cytidine triphosphate synthetase                                     | -1.20 | 166.79  | 81.93  |
| PF3D7_1410300   | WD repeat-containing protein, putative                               | -0.55 | 23.29   | 17.99  |
| PF3D7_1410400   | rho-try-associated protein 1 (RAP1)                                  | 0.45  | 444.78  | 685.14 |
| PF3D7_1410500   | conserved Plasmodium protein, unknown function                       | -0.30 | 13.26   | 12.17  |
| PF3D7_1410600   | eukaryotic translation initiation factor 2 gamma subunit, putative   | -0.86 | 665.36  | 413.49 |
| PF3D7_1410700   | conserved Plasmodium protein, unknown function                       | -0.20 | 32.50   | 31.94  |
| PF3D7_1410800   | ankyrin-repeat protein, putative                                     | 0.33  | 23.44   | 33.24  |
| PF3D7_1410900   | ribosome maturation protein SBDS, putative                           | 0.09  | 54.47   | 65.61  |
| PF3D7_1411000.1 | conserved Plasmodium protein, unknown function                       | 4.58  | 3.93    | 106.05 |
| PF3D7_1411000.2 | conserved Plasmodium protein, unknown function                       | 4.57  | 3.97    | 106.73 |
| PF3D7_1411100.1 | conserved Plasmodium membrane protein, unknown function              | 0.62  | 22.46   | 38.96  |
| PF3D7_1411100.2 | conserved Plasmodium membrane protein, unknown function              | 0.78  | 20.99   | 40.63  |
| PF3D7_1411200   | rhomboid protease ROM8 (ROM8)                                        | -0.54 | 252.80  | 197.03 |
| PF3D7_1411300   | conserved Plasmodium protein, unknown function                       | -0.17 | 31.41   | 31.47  |
| PF3D7_1411400   | plastid replication-repair enzyme (PREX)                             | 0.24  | 8.31    | 11.07  |
| PF3D7_1411500   | conserved Plasmodium protein, unknown function                       | -1.89 | 33.73   | 10.27  |
| PF3D7_1411600   | GTP-binding protein, putative                                        | 0.46  | 3.09    | 4.80   |
| PF3D7_1411700   | conserved protein, unknown function                                  | -1.22 | 15.77   | 7.62   |
| PF3D7_1411800   | conserved Plasmodium protein, unknown function                       | -0.55 | 15.63   | 12.06  |
| PF3D7_1411900   | p1/s1 nuclease, putative                                             | -2.17 | 252.72  | 63.28  |
| PF3D7_1412000   | p1/s1 nuclease, putative                                             | -0.31 | 18.12   | 16.56  |
| PF3D7_1412100   | conserved Plasmodium protein, unknown function                       | 0.07  | 17.90   | 21.17  |
| PF3D7_1412200   | conserved Plasmodium protein, unknown function                       | -1.14 | 15.80   | 8.10   |
| PF3D7_1412300   | nuclear transport factor 2, putative (NTF2)                          | -0.57 | 261.33  | 199.39 |
| PF3D7_1412400   | conserved Plasmodium protein, unknown function                       | -0.91 | 36.89   | 22.15  |

|                 |                                                                               |       |         |         |
|-----------------|-------------------------------------------------------------------------------|-------|---------|---------|
| PF3D7_1412500   | actin II (ACT2)                                                               | -1.08 | 147.75  | 79.15   |
| PF3D7_1412600   | deoxyhypusine synthase (DHS)                                                  | -1.57 | 47.37   | 18.07   |
| PF3D7_1412700   | AAA family ATPase, putative                                                   | -0.82 | 19.57   | 12.49   |
| PF3D7_1412800   | glycylpeptide N-tetradecanoyltransferase (NMT)                                | -1.36 | 264.85  | 116.74  |
| PF3D7_1412900.1 | ubiquitin-conjugating enzyme, putative                                        | -1.19 | 181.04  | 89.92   |
| PF3D7_1412900.2 | ubiquitin-conjugating enzyme, putative                                        | -0.89 | 123.60  | 75.07   |
| PF3D7_1413000   | conserved Plasmodium protein, unknown function                                | 0.27  | 0.24    | 0.33    |
| PF3D7_1413100   | conserved Plasmodium protein, unknown function                                | -0.03 | 0.51    | 0.57    |
| PF3D7_1413200   | conserved Plasmodium protein, unknown function                                | 2.30  | 5.15    | 28.72   |
| PF3D7_1413300   | conserved Plasmodium protein, unknown function                                | -1.79 | 0.76    | 0.19    |
| PF3D7_1413400   | 30S ribosomal protein S9, putative                                            | 0.68  | 10.17   | 18.40   |
| PF3D7_1413500   | FeS assembly ATPase SuFC (SuFC)                                               | 0.39  | 12.06   | 17.87   |
| PF3D7_1413600   | conserved Plasmodium protein, unknown function                                | 0.99  | 1.28    | 2.90    |
| PF3D7_1413700   | conserved Plasmodium protein, unknown function                                | 3.00  | 10.00   | 90.27   |
| PF3D7_1413800   | diphthamide biosynthesis protein I, putative (DPH1)                           | -1.21 | 77.85   | 38.05   |
| PF3D7_1413900   | DnaJ protein, putative                                                        | -1.98 | 99.27   | 28.47   |
| PF3D7_1414000   | 26S proteasome regulatory subunit RPN13, putative (RPN13)                     | 0.83  | 38.33   | 76.81   |
| PF3D7_1414100   | conserved Plasmodium protein, unknown function                                | -1.57 | 97.94   | 37.17   |
| PF3D7_1414200   | conserved Plasmodium protein, unknown function                                | -0.78 | 98.55   | 64.94   |
| PF3D7_1414300   | 60S ribosomal protein L10, putative                                           | -0.33 | 1017.83 | 917.49  |
| PF3D7_1414400   | serine/threonine protein phosphatase PP1 (PP1)                                | 0.55  | 135.92  | 224.38  |
| PF3D7_1414500   | atypical protein kinase, ABC-1 family, putative (ABCK2)                       | -0.07 | 77.11   | 82.87   |
| PF3D7_1414600   | RNA guanylyltransferase (Pgt1)                                                | -1.12 | 84.30   | 43.66   |
| PF3D7_1414700   | ubiquitin carboxyl-terminal hydrolase, putative                               | -1.23 | 39.73   | 19.18   |
| PF3D7_1414800   | small nuclear ribonucleoprotein-associated protein B, putative (SMB1)         | -1.57 | 142.01  | 53.97   |
| PF3D7_1414900   | ATP-dependent protease, putative                                              | -0.29 | 2.65    | 2.46    |
| PF3D7_1415000   | uracil-DNA glycosylase (UDG)                                                  | 0.61  | 16.51   | 28.38   |
| PF3D7_1415100   | conserved Plasmodium protein, unknown function                                | 1.64  | 3.60    | 12.73   |
| PF3D7_1415200   | DNA-directed RNA polymerase I/III subunit, putative                           | -0.70 | 24.94   | 17.35   |
| PF3D7_1415300   | RNA-binding protein Nova-1, putative                                          | 0.81  | 23.06   | 45.55   |
| PF3D7_1415400   | conserved Plasmodium protein, unknown function                                | 0.43  | 20.90   | 31.88   |
| PF3D7_1415500   | conserved Plasmodium membrane protein, unknown function                       | -0.77 | 2.29    | 1.51    |
| PF3D7_1415600   | conserved Plasmodium protein, unknown function                                | -0.82 | 17.86   | 11.39   |
| PF3D7_1415700   | serine C-palmitoyltransferase, putative                                       | -0.44 | 15.12   | 12.56   |
| PF3D7_1415800   | dimethyladenosine transferase, putative                                       | -1.30 | 87.88   | 40.27   |
| PF3D7_1415900   | zinc finger protein, putative                                                 | -1.41 | 78.17   | 33.15   |
| PF3D7_1416000   | conserved Plasmodium protein, unknown function                                | -0.91 | 1.93    | 1.15    |
| PF3D7_1416100   | protein SEY1, putative (SEY1)                                                 | -1.33 | 74.77   | 33.68   |
| PF3D7_1416200   | metacaspase-like protein (MCA3)                                               | 1.00  | 12.87   | 29.01   |
| PF3D7_1416300   | conserved protein, unknown function                                           | 0.30  | 12.16   | 16.91   |
| PF3D7_1416400   | conserved Plasmodium protein, unknown function                                | 0.76  | 5.65    | 10.82   |
| PF3D7_1416500   | NADP-specific glutamate dehydrogenase (GDH1)                                  | 0.81  | 73.94   | 146.65  |
| PF3D7_1416600   | conserved Plasmodium protein, unknown function                                | 1.85  | 1.02    | 4.19    |
| PF3D7_1416700   | conserved Plasmodium protein, unknown function                                | 1.25  | 1.80    | 4.93    |
| PF3D7_1416800   | lysine--tRNA ligase, putative                                                 | 1.15  | 5.35    | 13.40   |
| PF3D7_1416900   | prefoldin subunit 2, putative                                                 | 0.55  | 25.02   | 41.35   |
| PF3D7_1417000   | inner membrane complex protein 11, putative (IMC11)                           | 3.46  | 0.37    | 4.83    |
| PF3D7_1417100   | conserved Plasmodium protein, unknown function                                | 0.13  | 5.70    | 7.04    |
| PF3D7_1417200   | NOT family protein, putative                                                  | -1.03 | 128.30  | 70.94   |
| PF3D7_1417300   | cysteine protease ATG4, putative (ATG4)                                       | 0.17  | 7.22    | 9.15    |
| PF3D7_1417400   | rap guanine nucleotide exchange factor, putative, pseudogene (EPAC)           | 1.51  | 6.06    | 19.42   |
| PF3D7_1417500   | H/ACA ribonucleoprotein complex subunit 4, putative (CBF5)                    | -1.03 | 137.23  | 75.75   |
| PF3D7_1417600   | conserved Plasmodium protein, unknown function                                | -0.59 | 100.92  | 75.60   |
| PF3D7_1417700   | conserved Plasmodium protein, unknown function                                | 0.81  | 46.51   | 91.91   |
| PF3D7_1417800   | DNA replication licensing factor MCM2 (MCM2)                                  | 0.70  | 56.58   | 103.70  |
| PF3D7_1417900   | conserved Plasmodium protein, unknown function                                | 0.84  | 8.24    | 16.71   |
| PF3D7_1418000   | ubiquitin fusion degradation protein UFD1, putative (UFD1)                    | -0.17 | 44.19   | 44.28   |
| PF3D7_1418100   | liver specific protein 1, putative (LISP1)                                    | 0.49  | 0.12    | 0.19    |
| PF3D7_1418200   | conserved Plasmodium protein, unknown function                                | 0.01  | 5.86    | 6.69    |
| PF3D7_1418300   | calmodulin, putative                                                          | 0.62  | 12.81   | 22.34   |
| PF3D7_1418400   | tRNA Proline                                                                  | 2.21  | 0.00    | 1.35    |
| PF3D7_1418500   | 5S ribosomal RNA                                                              | -2.75 | 4.71    | 0.66    |
| PF3D7_1418600   | 5S ribosomal RNA                                                              | -2.14 | 3.01    | 0.66    |
| PF3D7_1418700   | 5S ribosomal RNA                                                              | -1.11 | 2.64    | 1.31    |
| PF3D7_1418800   | signal recognition particle RNA                                               | 2.63  | 22.47   | 157.85  |
| PF3D7_1418900   | DEAD/DEAH box ATP-dependent RNA helicase, putative                            | -0.46 | 69.44   | 56.94   |
| PF3D7_1419000   | conserved Plasmodium protein, unknown function                                | 0.11  | 29.90   | 36.56   |
| PF3D7_1419100   | ATP-dependent RNA helicase, putative                                          | -0.91 | 49.09   | 29.48   |
| PF3D7_1419200   | thioredoxin-like protein, putative                                            | 0.21  | 8.96    | 11.70   |
| PF3D7_1419300   | glutathione S-transferase (GST)                                               | -1.52 | 123.48  | 48.45   |
| PF3D7_1419400   | conserved Plasmodium membrane protein, unknown function                       | -1.53 | 61.47   | 24.11   |
| PF3D7_1419500   | conserved Plasmodium protein, unknown function                                | 0.22  | 1.27    | 1.69    |
| PF3D7_1419600   | conserved Plasmodium protein, unknown function                                | -0.12 | 47.67   | 49.63   |
| PF3D7_1419700   | conserved Plasmodium protein, unknown function                                | -0.82 | 164.65  | 105.53  |
| PF3D7_1419800.1 | glutathione reductase (GR)                                                    | 0.41  | 18.50   | 27.82   |
| PF3D7_1419800.2 | glutathione reductase (GR)                                                    | 0.41  | 17.13   | 25.64   |
| PF3D7_1419900   | YTH domain-containing protein, putative                                       | -1.38 | 34.64   | 15.01   |
| PF3D7_1420000   | splicing factor 3B subunit 4, putative (SF3B4)                                | -1.68 | 273.65  | 96.21   |
| PF3D7_1420100   | conserved Plasmodium protein, unknown function                                | 0.86  | 1.57    | 3.22    |
| PF3D7_1420200   | tetratricopeptide repeat family protein, putative                             | 0.82  | 13.31   | 26.50   |
| PF3D7_1420300   | zinc finger protein, putative                                                 | -0.51 | 29.10   | 23.03   |
| PF3D7_1420400   | glycine--tRNA ligase (GlyRS)                                                  | -1.46 | 201.24  | 82.59   |
| PF3D7_1420500   | conserved Plasmodium membrane protein, unknown function                       | 0.44  | 0.50    | 0.77    |
| PF3D7_1420600   | pantothenate kinase, putative (PANK)                                          | -0.09 | 16.87   | 17.85   |
| PF3D7_1420700   | surface protein P113 (P113)                                                   | -0.15 | 1199.54 | 1220.67 |
| PF3D7_1420800   | dynein-associated protein, putative                                           | -0.12 | 0.72    | 0.76    |
| PF3D7_1420900   | mannose-1-phosphate guanyltransferase, putative                               | 0.30  | 12.65   | 17.60   |
| PF3D7_1421000   | conserved Plasmodium protein, unknown function                                | -0.11 | 13.59   | 14.27   |
| PF3D7_1421100   | conserved Plasmodium protein, unknown function                                | -0.97 | 25.71   | 14.82   |
| PF3D7_1421150   | C/D small nucleolar RNA                                                       | 3.22  | 6.01    | 64.88   |
| PF3D7_1421200   | 40S ribosomal protein S25 (RPS25)                                             | -0.81 | 996.78  | 641.71  |
| PF3D7_1421300   | conserved Plasmodium protein, unknown function                                | 0.74  | 2.48    | 4.68    |
| PF3D7_1421400   | DNA-directed RNA polymerase III subunit C, putative                           | -1.55 | 66.24   | 25.49   |
| PF3D7_1421500   | mitochondrial import inner membrane translocase subunit TIM8, putative (TIM8) | -0.80 | 16.24   | 10.54   |
| PF3D7_1421600   | conserved Plasmodium protein, unknown function                                | -1.47 | 36.62   | 14.90   |
| PF3D7_1421700   | unspecified product                                                           | -4.35 | 7.35    | 0.31    |
| PF3D7_1421800   | conserved Plasmodium protein, unknown function                                | 2.26  | 1.41    | 7.68    |
| PF3D7_1421900   | copper transporter, putative                                                  | 0.37  | 59.18   | 86.64   |

|                 |                                                                |       |         |         |
|-----------------|----------------------------------------------------------------|-------|---------|---------|
| PF3D7_1422000   | conserved Plasmodium protein, unknown function                 | 0.62  | 7.07    | 12.37   |
| PF3D7_1422100   | mitochondrial ribosomal protein L21 precursor, putative        | 0.19  | 23.36   | 30.06   |
| PF3D7_1422200   | conserved Plasmodium protein, unknown function                 | 0.01  | 13.19   | 15.01   |
| PF3D7_1422300   | DnaJ protein, putative                                         | -0.44 | 12.96   | 10.82   |
| PF3D7_1422400   | conserved Plasmodium protein, unknown function                 | -1.40 | 35.57   | 15.24   |
| PF3D7_1422500   | ERAD-associated E3 ubiquitin-protein ligase HRD1 (HRD1)        | 0.04  | 16.32   | 19.01   |
| PF3D7_1422600   | conserved Plasmodium protein, unknown function                 | 0.56  | 9.97    | 16.57   |
| PF3D7_1422700   | conserved Plasmodium protein, unknown function                 | -1.25 | 55.15   | 26.11   |
| PF3D7_1422800   | actin-related protein, putative (ARP4a)                        | -1.33 | 21.51   | 9.65    |
| PF3D7_1422900   | 14-3-3 protein, putative                                       | 1.44  | 1.63    | 5.05    |
| PF3D7_1423000   | nucleolar GTP-binding protein 2, putative (NOG2)               | -0.91 | 127.88  | 76.76   |
| PF3D7_1423100   | ankyrin, putative                                              | 0.57  | 22.56   | 37.84   |
| PF3D7_1423200   | peptidyl-prolyl cis-trans isomerase (CYP52)                    | -0.52 | 48.84   | 38.44   |
| PF3D7_1423300   | serine/threonine protein phosphatase 7 (PP7)                   | 1.24  | 45.34   | 120.92  |
| PF3D7_1423400   | conserved Plasmodium membrane protein, unknown function        | -0.18 | 1.68    | 1.67    |
| PF3D7_1423500   | conserved Plasmodium protein, unknown function                 | -0.60 | 15.93   | 11.89   |
| PF3D7_1423600   | calcium-dependent protein kinase, putative                     | 0.40  | 18.89   | 28.08   |
| PF3D7_1423700   | conserved Plasmodium protein, unknown function                 | -0.99 | 267.48  | 151.91  |
| PF3D7_1423800   | vacuolar protein sorting-associated protein 3, putative (VPS3) | -1.63 | 58.22   | 21.29   |
| PF3D7_1423900   | small nucleolar RNA snoR23                                     | -3.96 | 2.87    | 0.00    |
| PF3D7_1424000   | small nucleolar RNA snoR24                                     | -0.38 | 0.00    | 0.00    |
| PF3D7_1424100   | 60S ribosomal protein L5, putative                             | -1.17 | 2058.11 | 1034.11 |
| PF3D7_1424200   | small nucleolar RNA snoR25                                     | 0.12  | 164.59  | 201.68  |
| PF3D7_1424300   | small nucleolar RNA snoR26                                     | -1.78 | 8.40    | 2.64    |
| PF3D7_1424400   | 60S ribosomal protein L7-3, putative                           | -0.65 | 1192.39 | 855.84  |
| PF3D7_1424500   | small nucleolar RNA snoR27                                     | -0.13 | 10.10   | 10.43   |
| PF3D7_1424600   | small nucleolar RNA snoR28                                     | -1.66 | 17.60   | 6.13    |
| PF3D7_1424700   | small nucleolar RNA snoR29                                     | 4.27  | 0.00    | 5.57    |
| PF3D7_1424800   | unspecified product                                            | -2.38 | 0.57    | 0.00    |
| PF3D7_1424900   | small nucleolar RNA snoR30                                     | 0.54  | 2.39    | 4.16    |
| PF3D7_1425000   | Plasmodium RNA of unknown function RUF4                        | 1.26  | 1.17    | 3.40    |
| PF3D7_1425100   | small nucleolar RNA snoR31                                     | -1.38 | 0.18    | 0.00    |
| PF3D7_1425200   | enoyl-CoA hydratase, putative                                  | 0.24  | 4.09    | 5.48    |
| PF3D7_1425300   | conserved Plasmodium protein, unknown function                 | 1.75  | 23.64   | 89.79   |
| PF3D7_1425400   | DEAD/DEAH box helicase, putative                               | 2.07  | 7.76    | 36.84   |
| PF3D7_1425500   | conserved Plasmodium protein, unknown function                 | 0.58  | 3.14    | 5.35    |
| PF3D7_1425600   | zinc finger protein, putative                                  | 0.80  | 0.77    | 1.51    |
| PF3D7_1425700   | conserved Plasmodium protein, unknown function                 | -0.66 | 29.62   | 21.20   |
| PF3D7_1425800   | conserved Plasmodium protein, unknown function                 | 0.29  | 6.20    | 8.56    |
| PF3D7_1425900   | conserved Plasmodium protein, unknown function                 | -2.29 | 114.47  | 26.34   |
| PF3D7_1426000   | 60S ribosomal protein L21 (RPL21)                              | -1.43 | 1359.00 | 567.95  |
| PF3D7_1426100   | basic transcription factor 3b, putative                        | -1.30 | 905.49  | 414.96  |
| PF3D7_1426200   | protein arginine N-methyltransferase 1 (PRMT1)                 | -1.15 | 178.77  | 90.83   |
| PF3D7_1426300   | dynein-associated protein, putative                            | 0.20  | 7.58    | 9.85    |
| PF3D7_1426400   | MORN repeat protein, putative                                  | 1.00  | 0.45    | 1.09    |
| PF3D7_1426500   | ABC transporter G family member 2 (ABCG2)                      | 0.89  | 1.98    | 4.16    |
| PF3D7_1426600   | conserved Plasmodium protein, unknown function                 | 0.71  | 2.82    | 5.23    |
| PF3D7_1426700   | phosphoenolpyruvate carboxylase (PEPC)                         | -1.05 | 129.86  | 70.87   |
| PF3D7_1426800   | conserved Plasmodium protein, unknown function                 | -1.33 | 45.80   | 20.57   |
| PF3D7_1426900   | ubiquinol-cytochrome c reductase hinge protein, putative       | 1.24  | 29.28   | 78.33   |
| PF3D7_1427000   | conserved Plasmodium protein, unknown function                 | 0.52  | 5.41    | 8.79    |
| PF3D7_1427100   | lipase, putative                                               | -0.96 | 231.70  | 134.28  |
| PF3D7_1427200   | selenoprotein (Se4)                                            | 0.74  | 10.95   | 20.65   |
| PF3D7_1427300   | conserved Plasmodium protein, unknown function                 | 0.24  | 11.16   | 14.85   |
| PF3D7_1427400.1 | conserved Plasmodium membrane protein, unknown function        | -1.20 | 21.25   | 10.45   |
| PF3D7_1427400.2 | conserved Plasmodium membrane protein, unknown function        | -1.20 | 21.33   | 10.49   |
| PF3D7_1427500   | DNA mismatch repair protein MSH2, putative (MSH2-1)            | 0.55  | 9.91    | 16.42   |
| PF3D7_1427600   | CorA-like Mg <sup>2+</sup> transporter protein, putative       | 0.54  | 5.63    | 9.28    |
| PF3D7_1427700   | conserved Plasmodium protein, unknown function                 | -0.18 | 3.15    | 3.15    |
| PF3D7_1427800   | exosome complex exonuclease RRP41, putative (RRP41)            | -1.42 | 30.89   | 13.05   |
| PF3D7_1427900   | conserved protein, unknown function                            | 0.08  | 201.57  | 241.12  |
| PF3D7_1428000   | conserved Plasmodium membrane protein, unknown function        | -0.18 | 4.98    | 4.98    |
| PF3D7_1428100   | WW domain-binding protein 11, putative                         | -0.14 | 23.75   | 24.33   |
| PF3D7_1428200   | metabolite/drug transporter, putative                          | -0.18 | 88.30   | 88.23   |
| PF3D7_1428300   | proliferation-associated protein 2g4, putative                 | -1.20 | 345.52  | 169.55  |
| PF3D7_1428400   | WD and tetratricopeptide repeats protein 1, putative (WDTC1)   | 0.88  | 1.04    | 2.16    |
| PF3D7_1428500   | protein kinase, putative                                       | -0.98 | 13.50   | 7.71    |
| PF3D7_1428600   | peptide chain release factor 1, putative                       | 0.76  | 6.59    | 12.65   |
| PF3D7_1428700   | conserved protein, unknown function                            | -0.03 | 11.46   | 12.68   |
| PF3D7_1428800.1 | transcription initiation TFIIID-like, putative                 | -1.18 | 35.41   | 17.67   |
| PF3D7_1428800.2 | transcription initiation TFIIID-like, putative                 | -1.17 | 35.33   | 17.68   |
| PF3D7_1428900   | conserved Plasmodium protein, unknown function                 | 0.56  | 9.55    | 15.95   |
| PF3D7_1429000   | protein archease, putative                                     | -1.60 | 21.55   | 8.03    |
| PF3D7_1429100   | apicoplast ribosomal protein L15 precursor, putative           | 0.97  | 13.20   | 29.24   |
| PF3D7_1429200   | transcription factor with AP2 domain(s), putative (ApiAP2)     | 1.02  | 1.90    | 4.37    |
| PF3D7_1429300   | CPW-WPC family protein                                         | 0.58  | 14.57   | 24.62   |
| PF3D7_1429400   | rRNA (adenosine-2'-O-)-methyltransferase, putative             | -1.47 | 25.47   | 10.36   |
| PF3D7_1429500   | diphthamide biosynthesis protein 2, putative (DPH2)            | -1.99 | 21.51   | 6.10    |
| PF3D7_1429600   | conserved Plasmodium protein, unknown function (GEXP03)        | 0.35  | 12.22   | 17.66   |
| PF3D7_1429700   | mitochondrial ribosomal protein L15 precursor, putative        | -0.38 | 49.56   | 43.12   |
| PF3D7_1429800   | coatamer beta subunit, putative                                | -1.35 | 159.92  | 70.65   |
| PF3D7_1429900   | ADP-dependent DNA helicase RecQ (WRN)                          | -0.07 | 15.87   | 17.03   |
| PF3D7_1430000   | conserved Plasmodium protein, unknown function                 | -0.06 | 11.92   | 12.90   |
| PF3D7_1430100   | serine/threonine protein phosphatase 2A activator (PTPA)       | 1.47  | 5.97    | 18.76   |
| PF3D7_1430200   | plasmepsin IX                                                  | 1.04  | 25.53   | 59.26   |
| PF3D7_1430300   | acid phosphatase, putative                                     | -1.31 | 73.44   | 33.40   |
| PF3D7_1430400   | autophagy protein 5, putative (ATG5)                           | -1.77 | 23.98   | 7.91    |
| PF3D7_1430500   | conserved Plasmodium protein, unknown function                 | 0.24  | 2.66    | 3.55    |
| PF3D7_1430600   | exodeoxyribonuclease III, putative                             | 0.63  | 1.98    | 3.45    |
| PF3D7_1430700   | NADP-specific glutamate dehydrogenase (GDH2)                   | 1.38  | 5.51    | 16.24   |
| PF3D7_1430800   | conserved Plasmodium protein, unknown function                 | 1.98  | 2.67    | 11.99   |
| PF3D7_1430900   | cytochrome c oxidase subunit 2, putative                       | 1.00  | 25.38   | 57.27   |
| PF3D7_1431000   | mitochondrial ribosomal protein L17-2 precursor, putative      | 0.73  | 8.25    | 15.46   |
| PF3D7_1431100   | conserved Plasmodium protein, unknown function                 | 2.26  | 3.71    | 20.18   |
| PF3D7_1431200   | conserved Plasmodium protein, unknown function                 | -1.20 | 62.69   | 30.78   |
| PF3D7_1431300   | large ribosomal subunit associated GTPase, putative            | -0.95 | 84.52   | 49.51   |
| PF3D7_1431400   | conserved Plasmodium protein, unknown function                 | 0.66  | 32.05   | 57.12   |
| PF3D7_1431500   | mitogen-activated protein kinase 1 (MAPK1)                     | 1.08  | 14.04   | 33.49   |

|                 |                                                                                 |       |         |         |
|-----------------|---------------------------------------------------------------------------------|-------|---------|---------|
| PF3D7_1431600   | ATP-specific succinyl-CoA synthetase beta subunit, putative                     | 0.59  | 14.53   | 24.70   |
| PF3D7_1431700   | 60S ribosomal protein L14, putative                                             | -1.07 | 538.85  | 290.28  |
| PF3D7_1431800   | apyrase, putative                                                               | 0.07  | 3.25    | 3.87    |
| PF3D7_1431900   | inner membrane complex suture component, putative (ISC3)                        | -0.39 | 8.76    | 7.52    |
| PF3D7_1432000   | syntaxin, Qa-SNARE family (SYN11)                                               | -0.22 | 8.78    | 8.49    |
| PF3D7_1432100   | voltage-dependent anion-selective channel protein, putative                     | -0.84 | 40.06   | 25.23   |
| PF3D7_1432200   | conserved Plasmodium protein, unknown function                                  | 0.95  | 6.28    | 13.66   |
| PF3D7_1432300   | conserved Plasmodium protein, unknown function                                  | -0.10 | 3.34    | 3.53    |
| PF3D7_1432400   | leucine-rich repeat protein (LRR5)                                              | 0.64  | 2.07    | 3.65    |
| PF3D7_1432500   | RNA methyltransferase, putative                                                 | -0.87 | 52.06   | 32.28   |
| PF3D7_1432600   | conserved Plasmodium protein, unknown function                                  | -1.36 | 11.10   | 4.87    |
| PF3D7_1432700   | protein-L-isoaspartate(D-aspartate) O-methyltransferase, putative               | 0.59  | 15.43   | 26.25   |
| PF3D7_1432800   | conserved Plasmodium protein, unknown function                                  | 0.38  | 15.36   | 22.54   |
| PF3D7_1432900   | SF-assemblin, putative                                                          | -1.04 | 27.35   | 15.06   |
| PF3D7_1433000   | H/ACA ribonucleoprotein complex subunit 3, putative (NOP10)                     | -1.72 | 26.93   | 9.17    |
| PF3D7_1433100   | conserved Plasmodium membrane protein, unknown function                         | -1.57 | 10.80   | 4.10    |
| PF3D7_1433200   | conserved Plasmodium protein, unknown function                                  | 0.88  | 0.54    | 1.12    |
| PF3D7_1433300   | chromatin assembly factor 1 P55 subunit, putative                               | -0.34 | 16.50   | 14.75   |
| PF3D7_1433400   | conserved Plasmodium membrane protein, unknown function                         | 0.33  | 40.89   | 57.92   |
| PF3D7_1433500   | DNA topoisomerase 2 (TOP2)                                                      | -0.06 | 332.08  | 360.88  |
| PF3D7_1433600   | microsomal signal peptidase protein, putative (SPC1)                            | 0.35  | 14.57   | 21.02   |
| PF3D7_1433700   | conserved Plasmodium protein, unknown function                                  | 0.09  | 3.51    | 4.21    |
| PF3D7_1433800   | conserved Plasmodium protein, unknown function                                  | 0.46  | 4.23    | 6.57    |
| PF3D7_1433900   | protein kinase, putative                                                        | 0.13  | 2.52    | 3.12    |
| PF3D7_1434000   | CCR4-associated factor 16, putative (CAF16)                                     | -0.67 | 41.21   | 29.29   |
| PF3D7_1434100   | queuine tRNA-ribosyltransferase, putative                                       | -1.62 | 29.66   | 10.91   |
| PF3D7_1434200   | calmodulin (CAM)                                                                | 0.05  | 353.52  | 414.45  |
| PF3D7_1434300   | Hsp70/Hsp90 organizing protein (HOP)                                            | -0.04 | 201.20  | 221.73  |
| PF3D7_1434400   | conserved Plasmodium membrane protein, unknown function                         | 1.82  | 20.36   | 81.44   |
| PF3D7_1434500   | dynein-related AAA-type ATPase, putative                                        | -0.78 | 37.45   | 24.64   |
| PF3D7_1434600   | methionine aminopeptidase 2 (METAP2)                                            | -0.56 | 202.08  | 155.10  |
| PF3D7_1434700   | mitochondrial import inner membrane translocase subunit TIM17, putative (TIM17) | 0.24  | 21.67   | 28.90   |
| PF3D7_1434800   | mitochondrial acidic protein MAM33, putative                                    | 1.03  | 35.33   | 81.25   |
| PF3D7_1434900   | conserved Plasmodium protein, unknown function                                  | 0.23  | 1.59    | 2.12    |
| PF3D7_1435000   | cytochrome c oxidase assembly protein, putative                                 | 0.53  | 13.18   | 21.45   |
| PF3D7_1435100   | ribonuclease H2 subunit B, putative                                             | 0.33  | 4.33    | 6.17    |
| PF3D7_1435200   | conserved Plasmodium protein, unknown function                                  | 0.75  | 21.36   | 40.60   |
| PF3D7_1435300   | NAD(P)H-dependent glutamate synthase, putative                                  | 1.64  | 17.32   | 61.06   |
| PF3D7_1435400   | ER membrane protein complex subunit 4, putative (EMC4)                          | -1.74 | 87.88   | 29.69   |
| PF3D7_1435500   | conserved Plasmodium protein, unknown function                                  | -1.02 | 45.82   | 25.43   |
| PF3D7_1435600   | conserved Plasmodium protein, unknown function                                  | 1.81  | 25.61   | 101.19  |
| PF3D7_1435700.1 | ataxin-2 like protein, putative                                                 | 1.09  | 14.55   | 35.08   |
| PF3D7_1435700.2 | ataxin-2 like protein, putative                                                 | 1.09  | 14.82   | 35.60   |
| PF3D7_1435800   | GTPase Era, putative (ERA)                                                      | 0.76  | 2.22    | 4.27    |
| PF3D7_1435900   | conserved Plasmodium protein, unknown function                                  | 0.20  | 3.09    | 4.03    |
| PF3D7_1436000   | glucose-6-phosphate isomerase (GPI)                                             | -1.43 | 226.06  | 95.04   |
| PF3D7_1436100   | conserved Plasmodium membrane protein, unknown function                         | -0.65 | 11.13   | 8.02    |
| PF3D7_1436200   | conserved Plasmodium protein, unknown function                                  | 1.43  | 17.84   | 54.28   |
| PF3D7_1436300   | translocon component PTEX150 (PTEX150)                                          | 0.13  | 763.36  | 944.16  |
| PF3D7_1436400   | conserved Plasmodium protein, unknown function                                  | 0.18  | 1.76    | 2.26    |
| PF3D7_1436500   | GTP-binding protein, putative                                                   | 0.24  | 4.13    | 5.50    |
| PF3D7_1436600   | cGMP-dependent protein kinase (PKG)                                             | 0.41  | 48.01   | 72.10   |
| PF3D7_1436700   | conserved Plasmodium protein, unknown function                                  | 0.08  | 3.10    | 3.71    |
| PF3D7_1436800   | ATP-dependent Clp protease proteolytic subunit (ClpR)                           | 0.54  | 5.49    | 9.04    |
| PF3D7_1436900   | histidine triad protein, putative                                               | -1.66 | 20.62   | 7.34    |
| PF3D7_1437000   | N-acetyltransferase, putative                                                   | -1.67 | 127.19  | 45.01   |
| PF3D7_1437100   | conserved Plasmodium protein, unknown function                                  | -0.52 | 6.06    | 4.78    |
| PF3D7_1437200   | ribonucleoside-diphosphate reductase, large subunit, putative                   | 0.41  | 103.68  | 155.21  |
| PF3D7_1437300   | conserved Plasmodium protein, unknown function                                  | 0.11  | 34.60   | 42.06   |
| PF3D7_1437400   | pantothenate kinase, putative                                                   | 0.31  | 9.34    | 13.06   |
| PF3D7_1437500   | conserved Plasmodium membrane protein, unknown function                         | -1.67 | 44.42   | 15.76   |
| PF3D7_1437600   | conserved Plasmodium protein, unknown function                                  | -0.26 | 0.71    | 0.68    |
| PF3D7_1437700   | succinyl-CoA ligase, putative                                                   | 0.51  | 10.07   | 16.21   |
| PF3D7_1437800   | trafficking protein particle complex subunit 5, putative (TRAPPC5)              | -1.08 | 54.69   | 29.18   |
| PF3D7_1437900   | HSP40, subfamily A, putative (ERdj3)                                            | -0.69 | 657.97  | 461.98  |
| PF3D7_1438000   | eukaryotic translation initiation factor eIF2A, putative                        | -1.55 | 287.38  | 111.09  |
| PF3D7_1438100   | secretory complex protein 62 (SEC62)                                            | -0.81 | 181.33  | 116.82  |
| PF3D7_1438200   | tRNA Selenocysteine                                                             | -1.27 | 2.56    | 1.11    |
| PF3D7_1438300   | tRNA Methionine                                                                 | -0.38 | 0.00    | 0.00    |
| PF3D7_1438400   | metacaspase-like protein (MCA2)                                                 | 0.44  | 21.00   | 32.14   |
| PF3D7_1438500   | cleavage and polyadenylation specificity factor, putative                       | -1.16 | 46.89   | 23.71   |
| PF3D7_1438600   | conserved protein, unknown function                                             | -1.69 | 52.24   | 18.25   |
| PF3D7_1438700   | DNA primase small subunit                                                       | 0.37  | 16.56   | 24.25   |
| PF3D7_1438800   | conserved Plasmodium protein, unknown function                                  | 1.71  | 3.21    | 11.88   |
| PF3D7_1438900   | thioredoxin peroxidase 1 (Trx-Px1)                                              | -1.20 | 570.24  | 280.65  |
| PF3D7_1439000   | copper transporter                                                              | -0.23 | 67.10   | 64.53   |
| PF3D7_1439100   | DEAD/DEAH box helicase, putative                                                | -1.39 | 19.91   | 8.56    |
| PF3D7_1439200   | conserved Plasmodium protein, unknown function                                  | -1.57 | 12.70   | 4.83    |
| PF3D7_1439300   | conserved Plasmodium protein, unknown function                                  | -0.45 | 28.26   | 23.41   |
| PF3D7_1439400   | ubiquinol-cytochrome c reductase iron-sulfur subunit, putative                  | 0.84  | 49.20   | 99.81   |
| PF3D7_1439500   | CCAAT-binding transcription factor, putative                                    | 1.06  | 19.68   | 46.38   |
| PF3D7_1439600   | conserved Plasmodium protein, unknown function                                  | 1.32  | 21.12   | 59.73   |
| PF3D7_1439700   | leucine carboxyl methyltransferase, putative                                    | 0.23  | 17.30   | 22.92   |
| PF3D7_1439800   | vesicle-associated membrane protein, putative                                   | -0.45 | 157.20  | 129.80  |
| PF3D7_1439900   | triosephosphate isomerase (TIM)                                                 | -1.36 | 547.76  | 241.76  |
| PF3D7_1440000   | conserved Plasmodium protein, unknown function                                  | -0.14 | 6.43    | 6.61    |
| PF3D7_1440100   | conserved Plasmodium protein, unknown function                                  | -0.05 | 35.90   | 39.22   |
| PF3D7_1440200   | stromal-processing peptidase, putative (SPP)                                    | 0.53  | 7.21    | 11.75   |
| PF3D7_1440300   | delta-aminolevulinic acid dehydratase (PBGs)                                    | 0.84  | 4.43    | 8.97    |
| PF3D7_1440400   | conserved Plasmodium protein, unknown function                                  | 0.55  | 8.82    | 14.63   |
| PF3D7_1440500   | allantoicase, putative                                                          | -0.33 | 14.37   | 12.89   |
| PF3D7_1440600   | conserved Plasmodium protein, unknown function                                  | 1.08  | 1.56    | 3.74    |
| PF3D7_1440700   | adaptor complexes medium subunit family                                         | -0.23 | 13.75   | 13.27   |
| PF3D7_1440800   | major facilitator superfamily, putative                                         | -1.01 | 10.17   | 5.68    |
| PF3D7_1440900   | conserved Plasmodium protein, unknown function                                  | 0.50  | 13.15   | 20.98   |
| PF3D7_1441000   | conserved Plasmodium protein, unknown function                                  | -1.31 | 30.09   | 13.72   |
| PF3D7_1441100   | conserved Plasmodium protein, unknown function                                  | -0.51 | 1884.32 | 1493.38 |
| PF3D7_1441200   | 60S ribosomal protein L1, putative                                              | -1.29 | 475.46  | 220.06  |



|               |                                                                     |       |         |         |
|---------------|---------------------------------------------------------------------|-------|---------|---------|
| PF3D7_1441300 | serine/threonine protein kinase, putative                           | -0.20 | 15.94   | 15.69   |
| PF3D7_1441400 | FACT complex subunit SSRP1, putative (FACT-S)                       | -0.54 | 47.70   | 37.05   |
| PF3D7_1441500 | conserved Plasmodium protein, unknown function                      | -0.99 | 18.19   | 10.32   |
| PF3D7_1441600 | acid cluster protein 33 homologue, putative                         | -0.70 | 9.03    | 6.28    |
| PF3D7_1441700 | metalloprotease, putative                                           | -0.09 | 1.76    | 1.87    |
| PF3D7_1441800 | vacuolar-sorting protein SNF7, putative                             | 0.71  | 7.86    | 14.58   |
| PF3D7_1441900 | RNA polymerase II transcription factor B subunit 5, putative (TFB5) | -1.24 | 25.47   | 12.13   |
| PF3D7_1442000 | ADP-ribosylation factor, putative                                   | 0.43  | 5.68    | 8.65    |
| PF3D7_1442100 | replication factor A protein 3, putative (RPA3)                     | 0.36  | 13.17   | 19.08   |
| PF3D7_1442200 | GTP-binding protein, putative                                       | 1.71  | 6.45    | 23.94   |
| PF3D7_1442300 | tRNA binding protein, putative                                      | -0.95 | 269.54  | 157.87  |
| PF3D7_1442400 | conserved Plasmodium protein, unknown function                      | 1.00  | 13.44   | 30.42   |
| PF3D7_1442500 | protein prenyltransferase alpha subunit, putative                   | -0.02 | 4.05    | 4.50    |
| PF3D7_1442600 | TRAP-like protein (TREP)                                            | 1.83  | 0.96    | 3.89    |
| PF3D7_1442700 | conserved Plasmodium protein, unknown function                      | 0.49  | 4.20    | 6.65    |
| PF3D7_1442800 | conserved Plasmodium protein, unknown function                      | -1.42 | 3.98    | 1.68    |
| PF3D7_1442900 | protein transport protein SEC7, putative (SEC7)                     | -0.97 | 131.78  | 76.00   |
| PF3D7_1443000 | serine/threonine protein kinase (SRPK2)                             | 0.83  | 6.68    | 13.44   |
| PF3D7_1443100 | conserved Plasmodium protein, unknown function                      | 0.33  | 44.05   | 62.61   |
| PF3D7_1443200 | conserved Plasmodium protein, unknown function                      | 0.18  | 4.48    | 5.75    |
| PF3D7_1443300 | U6 snRNA-associated Sm-like protein LSm5, putative (LSM5)           | -2.16 | 143.26  | 36.11   |
| PF3D7_1443400 | WD repeat-containing protein, putative                              | 0.39  | 16.53   | 24.42   |
| PF3D7_1443500 | poly(A)-specific ribonuclease PARN, putative (PARN)                 | 0.78  | 3.15    | 6.13    |
| PF3D7_1443600 | conserved Plasmodium protein, unknown function                      | -0.34 | 3.16    | 2.83    |
| PF3D7_1443700 | dephospho-CoA kinase, putative (DPCK)                               | 0.00  | 8.53    | 9.66    |
| PF3D7_1443800 | zinc finger protein, putative                                       | -0.49 | 39.82   | 31.96   |
| PF3D7_1443900 | heat shock protein 90, putative (HSP90)                             | -0.16 | 31.38   | 31.70   |
| PF3D7_1444000 | conserved Plasmodium protein, unknown function                      | -1.79 | 0.49    | 0.14    |
| PF3D7_1444100 | conserved Plasmodium protein, unknown function                      | 1.80  | 1.66    | 6.50    |
| PF3D7_1444200 | calmodulin-like protein                                             | 0.87  | 6.78    | 14.09   |
| PF3D7_1444300 | 1-acyl-sn-glycerol-3-phosphate acyltransferase, putative (LPAAT)    | 0.62  | 68.22   | 118.78  |
| PF3D7_1444400 | conserved Plasmodium protein, unknown function                      | -2.10 | 13.76   | 3.61    |
| PF3D7_1444500 | eukaryotic initiation factor 2alpha kinase 1 (IK1)                  | -1.42 | 44.67   | 18.90   |
| PF3D7_1444600 | conserved Plasmodium protein, unknown function                      | 0.73  | 6.06    | 11.45   |
| PF3D7_1444700 | conserved Plasmodium protein, unknown function                      | 0.69  | 8.90    | 16.26   |
| PF3D7_1444800 | fructose-bisphosphate aldolase (FBPA)                               | 1.57  | 991.94  | 3326.00 |
| PF3D7_1444900 | conserved Plasmodium protein, unknown function                      | 0.98  | 2.93    | 6.61    |
| PF3D7_1445000 | conserved Plasmodium protein, unknown function                      | -0.79 | 10.40   | 6.77    |
| PF3D7_1445100 | histidine-tRNA ligase, putative                                     | -2.64 | 108.20  | 19.61   |
| PF3D7_1445200 | RNA helicase, putative                                              | -1.21 | 124.30  | 60.59   |
| PF3D7_1445300 | mitochondrial ribosomal protein S29 precursor, putative             | -0.74 | 11.96   | 8.11    |
| PF3D7_1445400 | protein serine/threonine kinase-1 (CLK1)                            | -0.47 | 176.21  | 143.67  |
| PF3D7_1445500 | conserved Plasmodium protein, unknown function                      | -0.94 | 131.91  | 77.40   |
| PF3D7_1445600 | RNA-binding protein, putative                                       | -0.96 | 210.89  | 122.43  |
| PF3D7_1445700 | conserved Plasmodium protein, unknown function                      | -0.66 | 285.28  | 204.08  |
| PF3D7_1445800 | conserved Plasmodium membrane protein, unknown function             | -0.20 | 2.52    | 2.48    |
| PF3D7_1445900 | ATP-dependent RNA helicase DDX5, putative (DDX5)                    | -1.06 | 556.77  | 301.18  |
| PF3D7_1446000 | U5 spliceosomal RNA                                                 | 5.35  | 0.19    | 17.49   |
| PF3D7_1446100 | conserved Plasmodium protein, unknown function                      | 0.13  | 2.95    | 3.66    |
| PF3D7_1446200 | M17 leucyl aminopeptidase (LAP)                                     | -1.62 | 539.58  | 197.87  |
| PF3D7_1446300 | conserved Plasmodium membrane protein, unknown function             | 1.23  | 18.47   | 48.90   |
| PF3D7_1446400 | pyruvate dehydrogenase E1 component subunit beta (pdhB)             | 0.69  | 6.62    | 12.09   |
| PF3D7_1446500 | conserved Plasmodium protein, unknown function                      | -1.13 | 81.06   | 41.80   |
| PF3D7_1446600 | centrin-2 (CEN2)                                                    | 1.09  | 79.00   | 190.60  |
| PF3D7_1446700 | conserved Plasmodium protein, unknown function                      | 0.59  | 28.09   | 47.69   |
| PF3D7_1446800 | heme detoxification protein (HDP)                                   | 0.95  | 9.46    | 20.72   |
| PF3D7_1446900 | glutaminy-peptide cyclotransferase, putative                        | -0.87 | 77.29   | 47.91   |
| PF3D7_1447000 | 40S ribosomal protein S5                                            | -0.65 | 1778.24 | 1276.27 |
| PF3D7_1447100 | conserved Plasmodium protein, unknown function                      | -0.76 | 97.73   | 65.10   |
| PF3D7_1447200 | conserved Plasmodium protein, unknown function                      | -0.98 | 167.24  | 95.50   |
| PF3D7_1447300 | mitochondrial ribosomal protein S14 precursor, putative             | -0.46 | 7.93    | 6.50    |
| PF3D7_1447400 | conserved Plasmodium protein, unknown function                      | -1.62 | 31.39   | 11.48   |
| PF3D7_1447500 | inner membrane complex protein, putative (IMC20)                    | 2.44  | 2.01    | 12.59   |
| PF3D7_1447600 | conserved Plasmodium protein, unknown function                      | 1.79  | 0.55    | 2.34    |
| PF3D7_1447700 | conserved Plasmodium protein, unknown function                      | -0.66 | 15.37   | 10.99   |
| PF3D7_1447800 | calponin homology domain-containing protein, putative               | -0.80 | 15.76   | 10.22   |
| PF3D7_1447900 | multidrug resistance protein 2 (MDR2)                               | 0.13  | 20.35   | 25.07   |
| PF3D7_1448000 | U3 small nucleolar RNA-associated protein 12, putative (UTP12)      | -1.68 | 83.31   | 29.27   |
| PF3D7_1448100 | conserved Plasmodium protein, unknown function                      | -2.70 | 16.19   | 2.78    |
| PF3D7_1448200 | conserved Plasmodium protein, unknown function                      | -0.07 | 0.55    | 0.59    |
| PF3D7_1448300 | conserved Plasmodium protein, unknown function                      | -0.53 | 56.94   | 44.59   |
| PF3D7_1448400 | ubiquitin-protein ligase, putative (HRD3)                           | 0.07  | 17.05   | 20.27   |
| PF3D7_1448500 | conserved Plasmodium protein, unknown function                      | 0.83  | 13.59   | 27.35   |
| PF3D7_1448600 | SNARE protein, putative (VTI1)                                      | -0.36 | 45.50   | 40.03   |
| PF3D7_1448700 | conserved Plasmodium protein, unknown function                      | -1.28 | 24.46   | 11.38   |
| PF3D7_1448800 | Appr-1-p processing domain protein                                  | -0.47 | 20.24   | 16.52   |
| PF3D7_1448900 | conserved Plasmodium protein, unknown function                      | 0.70  | 1.67    | 3.16    |
| PF3D7_1449000 | gamete egress and sporozoite traversal protein, putative (GEST)     | 2.89  | 1.77    | 15.03   |
| PF3D7_1449100 | conserved Plasmodium protein, unknown function                      | 0.62  | 21.30   | 36.96   |
| PF3D7_1449200 | conserved Plasmodium protein, unknown function                      | 0.88  | 264.46  | 548.90  |
| PF3D7_1449300 | transcription factor IIIB subunit, putative                         | -1.25 | 98.69   | 46.83   |
| PF3D7_1449400 | crossover junction endonuclease MUS81, putative (MUS81)             | 0.72  | 7.18    | 13.40   |
| PF3D7_1449500 | transcription factor with AP2 domain(s), putative (ApiAP2)          | -0.58 | 33.96   | 25.66   |
| PF3D7_1449600 | conserved Plasmodium protein, unknown function                      | -0.28 | 19.01   | 17.69   |
| PF3D7_1449700 | exosome complex exonuclease RRP6 (RRP6)                             | -1.52 | 24.43   | 9.65    |
| PF3D7_1449800 | conserved Plasmodium protein, unknown function                      | -0.63 | 36.87   | 26.97   |
| PF3D7_1449900 | conserved Plasmodium protein, unknown function                      | -0.76 | 15.50   | 10.33   |
| PF3D7_1450000 | serine/threonine protein kinase, putative                           | -0.24 | 44.80   | 42.98   |
| PF3D7_1450100 | signal recognition particle subunit SRP54 (SRP54)                   | -1.64 | 236.71  | 85.55   |
| PF3D7_1450200 | conserved Plasmodium protein, unknown function                      | -1.44 | 24.93   | 10.38   |
| PF3D7_1450300 | NADPH-cytochrome P450 reductase, putative (CPR)                     | -1.74 | 48.19   | 16.26   |
| PF3D7_1450400 | zinc finger protein, putative                                       | -1.14 | 63.22   | 32.38   |
| PF3D7_1450500 | conserved Plasmodium protein, unknown function                      | 0.99  | 7.43    | 16.67   |
| PF3D7_1450600 | S-adenosylmethionine-dependent methyltransferase, putative          | -1.91 | 54.98   | 16.56   |
| PF3D7_1450700 | conserved Plasmodium protein, unknown function                      | -0.30 | 59.71   | 54.75   |
| PF3D7_1450800 | conserved Plasmodium protein, unknown function                      | 0.73  | 2.49    | 4.68    |
| PF3D7_1450900 | acetyl-CoA acetyltransferase, putative                              | 0.25  | 3.57    | 4.82    |
| PF3D7_1451000 | conserved Plasmodium protein, unknown function                      | -1.06 | 23.49   | 12.76   |

|                 |                                                                      |       |         |         |
|-----------------|----------------------------------------------------------------------|-------|---------|---------|
| PF3D7_1451100   | elongation factor 2 (eEF2)                                           | -1.19 | 1905.71 | 943.68  |
| PF3D7_1451200   | conserved Plasmodium protein, unknown function                       | -0.49 | 533.19  | 427.78  |
| PF3D7_1451300   | E3 SUMO-protein ligase NSE2, putative (NSE2)                         | 0.60  | 20.61   | 35.34   |
| PF3D7_1451400   | transcriptional regulatory protein sir2b (Sir2B)                     | -1.59 | 17.52   | 6.58    |
| PF3D7_1451500   | pre-mRNA-splicing factor CWF18, putative                             | -1.32 | 29.56   | 13.39   |
| PF3D7_1451600   | LCCL domain-containing protein (LAP5)                                | 0.72  | 0.56    | 1.05    |
| PF3D7_1451700   | calcineurin subunit B (CNB)                                          | 1.13  | 21.48   | 53.22   |
| PF3D7_1451800   | sortilin                                                             | 0.18  | 56.73   | 72.61   |
| PF3D7_1451900   | ribosome biogenesis protein TSR1, putative (TSR1)                    | -1.13 | 74.06   | 38.16   |
| PF3D7_1452000   | rhoptry neck protein 2 (RON2)                                        | -0.14 | 61.87   | 63.62   |
| PF3D7_1452100   | leucine-rich repeat protein (LRR3)                                   | -2.27 | 11.39   | 2.64    |
| PF3D7_1452200   | aminomethyltransferase, putative                                     | -0.30 | 1.74    | 1.60    |
| PF3D7_1452300   | DER1-like protein (Der1-1)                                           | 0.74  | 3.09    | 5.86    |
| PF3D7_1452400   | conserved Plasmodium protein, unknown function                       | -0.97 | 116.90  | 67.38   |
| PF3D7_1452500   | SNARE protein, putative (BET1)                                       | 0.45  | 11.09   | 17.19   |
| PF3D7_1452600   | conserved Plasmodium protein, unknown function                       | -1.02 | 15.59   | 8.68    |
| PF3D7_1452700   | U1 snRNA associated protein, putative                                | 0.98  | 19.90   | 44.49   |
| PF3D7_1452800   | conserved Plasmodium protein, unknown function                       | 0.52  | 2.24    | 3.64    |
| PF3D7_1452900   | conserved Plasmodium protein, unknown function                       | 0.76  | 4.04    | 7.77    |
| PF3D7_1453000   | conserved Plasmodium protein, unknown function                       | -1.41 | 31.82   | 13.48   |
| PF3D7_1453100   | dynactin subunit 4, putative                                         | 0.72  | 1.67    | 3.12    |
| PF3D7_1453200   | conserved Plasmodium protein, unknown function                       | 0.49  | 6.14    | 9.75    |
| PF3D7_1453300   | conserved protein, unknown function                                  | -3.70 | 1.84    | 0.08    |
| PF3D7_1453400   | conserved Plasmodium protein, unknown function                       | -1.59 | 16.26   | 6.09    |
| PF3D7_1453500   | pyridine nucleotide transhydrogenase, putative                       | 0.10  | 1.22    | 1.48    |
| PF3D7_1453600   | RAP protein, putative                                                | -0.21 | 1.99    | 1.95    |
| PF3D7_1453700   | co-chaperone p23 (P23)                                               | 0.03  | 938.68  | 1083.88 |
| PF3D7_1453800   | glucose-6-phosphate dehydrogenase-6-phosphogluconolactonase (GluPho) | -1.27 | 123.81  | 58.01   |
| PF3D7_1453900   | conserved Plasmodium protein, unknown function                       | -1.69 | 100.51  | 35.27   |
| PF3D7_1454000   | RNA-binding protein, putative                                        | -0.32 | 27.11   | 24.58   |
| PF3D7_1454100   | tRNA intron endonuclease, putative                                   | 0.11  | 3.73    | 4.57    |
| PF3D7_1454200   | conserved Plasmodium protein, unknown function                       | -2.01 | 35.13   | 9.87    |
| PF3D7_1454300   | serine/threonine protein kinase KIN (KIN)                            | -0.72 | 6.74    | 4.63    |
| PF3D7_1454400   | aminopeptidase P (APP)                                               | -1.10 | 271.76  | 143.56  |
| PF3D7_1454500   | nifU protein, putative (IscU1)                                       | -0.75 | 155.79  | 104.39  |
| PF3D7_1454600   | mitochondrial ribosomal protein S11 precursor, putative              | -0.03 | 21.00   | 23.16   |
| PF3D7_1454700   | 6-phosphogluconate dehydrogenase, decarboxylating, putative          | -1.16 | 193.73  | 97.99   |
| PF3D7_1454800   | conserved Plasmodium protein, unknown function                       | -2.05 | 3.71    | 0.98    |
| PF3D7_1454900   | conserved Plasmodium protein, unknown function                       | 1.12  | 0.77    | 1.97    |
| PF3D7_1455000   | protein phosphatase PPM3, putative (PPM3)                            | 0.58  | 2.29    | 3.89    |
| PF3D7_1455100   | protein tyrosine phosphatase, putative (PTP1)                        | 0.89  | 67.63   | 142.06  |
| PF3D7_1455200.1 | methyltransferase, putative                                          | 0.69  | 6.74    | 12.33   |
| PF3D7_1455200.2 | methyltransferase, putative                                          | 0.69  | 6.77    | 12.39   |
| PF3D7_1455300   | conserved Plasmodium protein, unknown function                       | 3.06  | 20.08   | 188.92  |
| PF3D7_1455400   | hemolysin III (HlyIII)                                               | -1.24 | 115.93  | 55.56   |
| PF3D7_1455500   | AP-1 complex subunit gamma, putative                                 | -0.76 | 33.23   | 22.11   |
| PF3D7_1455600   | ferlin, putative                                                     | 0.32  | 5.17    | 7.29    |
| PF3D7_1455700   | conserved Plasmodium protein, unknown function                       | 0.95  | 7.79    | 17.01   |
| PF3D7_1455800   | LCCL domain-containing protein (CCp2)                                | 1.54  | 0.59    | 1.96    |
| PF3D7_1455900   | polyprenol reductase, putative                                       | 1.21  | 6.94    | 18.24   |
| PF3D7_1456000   | transcription factor with AP2 domain(s) (ApiAP2)                     | 0.57  | 9.18    | 15.37   |
| PF3D7_1456100   | serine hydroxymethyltransferase, putative (SHMT)                     | 1.09  | 0.32    | 0.80    |
| PF3D7_1456200   | conserved Plasmodium protein, unknown function                       | 1.56  | 0.55    | 1.84    |
| PF3D7_1456300   | conserved Plasmodium protein, unknown function                       | -2.18 | 12.83   | 3.19    |
| PF3D7_1456400   | conserved Plasmodium protein, unknown function                       | 0.99  | 0.56    | 1.27    |
| PF3D7_1456500   | conserved Plasmodium protein, unknown function                       | 0.58  | 8.31    | 14.01   |
| PF3D7_1456600   | mitochondrial ribosomal protein L28 precursor, putative              | 0.54  | 3.28    | 5.41    |
| PF3D7_1456700   | conserved Plasmodium protein, unknown function                       | -1.13 | 69.95   | 36.09   |
| PF3D7_1456800   | V-type H(+)-translocating pyrophosphatase, putative (VP1)            | -1.64 | 722.27  | 261.59  |
| PF3D7_1456900   | conserved protein, unknown function                                  | -1.30 | 80.77   | 37.01   |
| PF3D7_1457000   | signal peptide peptidase (SPP)                                       | -0.60 | 231.81  | 173.09  |
| PF3D7_1457100   | conserved Plasmodium protein, unknown function                       | -1.24 | 27.12   | 12.94   |
| PF3D7_1457200   | thioredoxin 1 (TRX1)                                                 | 0.06  | 237.37  | 278.56  |
| PF3D7_1457300   | conserved Plasmodium protein, unknown function                       | -1.70 | 207.28  | 72.24   |
| PF3D7_1457400   | conserved Plasmodium protein, unknown function                       | -1.64 | 19.19   | 6.98    |
| PF3D7_1457500   | vacuolar protein sorting-associated protein 4 (VPS4)                 | 0.76  | 13.58   | 26.02   |
| PF3D7_1457600   | conserved Plasmodium protein, unknown function                       | -1.49 | 40.30   | 16.23   |
| PF3D7_1457700   | large ribosomal subunit nuclear export factor, putative              | -1.41 | 68.94   | 29.26   |
| PF3D7_1457800   | conserved Plasmodium protein, unknown function                       | 0.73  | 5.48    | 10.29   |
| PF3D7_1457900   | conserved Plasmodium protein, unknown function                       | -0.47 | 17.81   | 14.53   |
| PF3D7_1458000   | cysteine proteinase falcipain 1 (FP1)                                | -1.11 | 206.65  | 107.82  |
| PF3D7_1458100   | protein PET117, putative (PET117)                                    | 0.26  | 7.34    | 10.02   |
| PF3D7_1458200   | conserved Plasmodium protein, unknown function                       | -1.19 | 21.86   | 10.83   |
| PF3D7_1458300   | conserved Plasmodium protein, unknown function                       | 0.16  | 14.89   | 18.73   |
| PF3D7_1458400   | aminodeoxychorismate lyase (ADCL)                                    | -0.78 | 16.63   | 10.90   |
| PF3D7_1458500   | spindle assembly abnormal protein 4, putative (SAS4)                 | 0.49  | 8.09    | 12.80   |
| PF3D7_1458600   | conserved Plasmodium protein, unknown function                       | -0.89 | 27.15   | 16.50   |
| PF3D7_1458700   | exonuclease V, mitochondrial, putative                               | 0.83  | 15.63   | 31.42   |
| PF3D7_1458800   | conserved Plasmodium protein, unknown function                       | -2.32 | 21.50   | 4.85    |
| PF3D7_1458900   | golgi apparatus membrane protein TVP23, putative (TVP23)             | -1.69 | 28.70   | 10.01   |
| PF3D7_1459000   | ATP-dependent RNA helicase DBP5 (DBP5)                               | -1.18 | 374.40  | 186.76  |
| PF3D7_1459100   | GTP-binding protein, putative                                        | -0.39 | 3.71    | 3.19    |
| PF3D7_1459200   | WD repeat-containing protein, putative                               | -0.64 | 33.62   | 24.40   |
| PF3D7_1459300   | OPA3-like protein, putative                                          | -1.05 | 16.74   | 9.13    |
| PF3D7_1459400   | conserved Plasmodium protein, unknown function                       | -2.05 | 180.82  | 49.25   |
| PF3D7_1459500   | conserved Plasmodium protein, unknown function                       | -0.40 | 0.98    | 0.84    |
| PF3D7_1459600   | conserved Plasmodium protein, unknown function                       | -1.04 | 86.68   | 47.46   |
| PF3D7_1459700   | pyridoxal 5'-phosphate synthase, putative                            | 1.28  | 6.61    | 18.16   |
| PF3D7_1459800   | bax inhibitor 1, putative                                            | 0.14  | 68.94   | 85.87   |
| PF3D7_1459900   | conserved Plasmodium membrane protein, unknown function              | 0.71  | 9.78    | 18.05   |
| PF3D7_1460000   | biotin protein ligase, putative                                      | 1.89  | 0.35    | 1.56    |
| PF3D7_1460100   | FYVE and coiled-coil domain-containing protein (FCP)                 | 0.40  | 38.13   | 56.90   |
| PF3D7_1460200   | conserved Plasmodium protein, unknown function                       | 0.11  | 7.01    | 8.52    |
| PF3D7_1460300   | 60S ribosomal protein L29, putative                                  | -1.75 | 212.14  | 71.18   |
| PF3D7_1460400   | ubiquitin carboxyl-terminal hydrolase isozyme L3 (UCHL3)             | -0.39 | 40.06   | 34.63   |
| PF3D7_1460500   | conserved Plasmodium protein, unknown function                       | 0.53  | 10.85   | 17.73   |
| PF3D7_1460600   | inner membrane complex sub-compartment protein 3 (ISP3)              | 2.06  | 8.97    | 42.43   |
| PF3D7_1460700   | 60S ribosomal protein L27 (RPL27)                                    | -1.44 | 1364.60 | 567.96  |

|                 |                                                                      |       |         |         |
|-----------------|----------------------------------------------------------------------|-------|---------|---------|
| PF3D7_1460800   | snRNA-activating protein complex subunit 3, putative                 | 0.74  | 2.91    | 5.51    |
| PF3D7_1460900.1 | apicoplast ribosomal protein S10, putative (ARPS10)                  | 0.59  | 5.75    | 9.81    |
| PF3D7_1460900.2 | apicoplast ribosomal protein S10, putative (ARPS10)                  | 0.64  | 5.67    | 10.02   |
| PF3D7_1461000   | conserved Plasmodium protein, unknown function                       | 0.53  | 1.31    | 2.15    |
| PF3D7_1461100   | conserved Plasmodium protein, unknown function                       | -0.23 | 8.35    | 8.05    |
| PF3D7_1461200   | U3 small nucleolar ribonucleoprotein protein IMP3, putative (IMP3)   | -1.79 | 82.54   | 27.01   |
| PF3D7_1461300   | 40S ribosomal protein S28e, putative                                 | -0.88 | 268.03  | 164.71  |
| PF3D7_1461400   | conserved Plasmodium protein, unknown function                       | 0.85  | 54.05   | 109.92  |
| PF3D7_1461500   | meiotic nuclear division protein 1, putative (MND1)                  | -0.75 | 1.71    | 1.14    |
| PF3D7_1461600   | splicing factor 3B subunit 2, putative (SF3B2)                       | -0.79 | 131.17  | 85.73   |
| PF3D7_1461700   | conserved Plasmodium protein, unknown function                       | 2.18  | 2.65    | 13.76   |
| PF3D7_1461800   | conserved Plasmodium protein, unknown function                       | 1.93  | 6.08    | 26.18   |
| PF3D7_1461900   | valine--tRNA ligase, putative                                        | -1.26 | 131.93  | 62.40   |
| PF3D7_1462000   | thioredoxin-like protein (TLP1)                                      | -1.38 | 1.41    | 0.59    |
| PF3D7_1462100   | conserved Plasmodium protein, unknown function                       | -0.46 | 2.51    | 2.07    |
| PF3D7_1462200   | conserved Plasmodium protein, unknown function                       | 1.91  | 3.94    | 17.03   |
| PF3D7_1462300   | conserved Plasmodium protein, unknown function                       | -1.59 | 156.38  | 58.48   |
| PF3D7_1462400   | conserved Plasmodium protein, unknown function                       | -1.33 | 90.96   | 40.83   |
| PF3D7_1462500   | conserved Plasmodium protein, unknown function                       | 0.29  | 0.21    | 0.29    |
| PF3D7_1462600   | conserved Plasmodium membrane protein, unknown function              | 2.30  | 0.06    | 0.38    |
| PF3D7_1462700   | cytochrome c1 precursor, putative                                    | 0.54  | 32.93   | 54.10   |
| PF3D7_1462800   | glyceraldehyde-3-phosphate dehydrogenase (GAPDH)                     | -0.59 | 5993.56 | 4497.35 |
| PF3D7_1462900   | conserved Plasmodium protein, unknown function                       | -2.16 | 13.27   | 3.34    |
| PF3D7_1463000   | conserved Plasmodium protein, unknown function                       | -1.58 | 20.13   | 7.57    |
| PF3D7_1463100   | conserved Plasmodium protein, unknown function, pseudogene           | 0.62  | 0.02    | 0.05    |
| PF3D7_1463200   | replication factor C subunit 3, putative (RFC3)                      | 0.93  | 25.86   | 55.87   |
| PF3D7_1463300   | DNA polymerase alpha subunit, putative                               | -0.12 | 5.67    | 5.88    |
| PF3D7_1463400   | DNA-directed RNA polymerase III subunit RPC4, putative               | -1.59 | 87.65   | 32.93   |
| PF3D7_1463500   | fam-a protein                                                        | -0.78 | 78.96   | 52.05   |
| PF3D7_1463600   | conserved Plasmodium protein, unknown function                       | -0.82 | 1.72    | 1.08    |
| PF3D7_1463700   | cyclin homologue (CYC1)                                              | -1.31 | 28.22   | 12.87   |
| PF3D7_1463800   | mitochondrial ribosomal protein S6-2 precursor, putative             | 0.51  | 4.26    | 6.87    |
| PF3D7_1463900   | conserved Plasmodium membrane protein, unknown function              | 0.39  | 50.77   | 75.33   |
| PF3D7_1464000   | YL1 nuclear protein, putative                                        | -0.88 | 104.93  | 64.20   |
| PF3D7_1464100   | conserved Plasmodium protein, unknown function                       | -0.84 | 1.78    | 1.12    |
| PF3D7_1464200   | zinc finger protein, putative                                        | -1.21 | 25.14   | 12.26   |
| PF3D7_1464300   | conserved Plasmodium protein, unknown function                       | -1.27 | 2.60    | 1.22    |
| PF3D7_1464400   | zinc finger protein, putative                                        | -0.07 | 56.25   | 60.51   |
| PF3D7_1464500   | conserved Plasmodium membrane protein, unknown function              | 0.53  | 14.76   | 24.09   |
| PF3D7_1464600   | phosphatase, putative                                                | 0.71  | 206.84  | 383.43  |
| PF3D7_1464700   | ATP synthase (C/AC39) subunit, putative                              | -0.53 | 112.91  | 88.27   |
| PF3D7_1464800   | conserved Plasmodium protein, unknown function                       | 1.95  | 0.00    | 0.22    |
| PF3D7_1464900   | ATP-dependent zinc metalloprotease FTSH, putative                    | -0.92 | 138.05  | 82.55   |
| PF3D7_1465000   | conserved Plasmodium protein, unknown function                       | 0.92  | 26.17   | 56.05   |
| PF3D7_1465100   | conserved Plasmodium protein, unknown function                       | 0.33  | 4.94    | 7.01    |
| PF3D7_1465200   | conserved Plasmodium protein, unknown function                       | -1.59 | 61.02   | 22.87   |
| PF3D7_1465300   | tRNA 3'-trailer sequence RNase, putative                             | -1.41 | 34.58   | 14.71   |
| PF3D7_1465400   | conserved Plasmodium protein, unknown function                       | -0.86 | 129.89  | 80.75   |
| PF3D7_1465500   | potassium channel (K2)                                               | -0.67 | 1.00    | 0.71    |
| PF3D7_1465600   | conserved Plasmodium protein, unknown function                       | -1.18 | 4.22    | 2.10    |
| PF3D7_1465700   | plasmepsin VIII                                                      | 1.27  | 0.43    | 1.20    |
| PF3D7_1465800   | dynein beta chain, putative                                          | 0.43  | 0.71    | 1.09    |
| PF3D7_1465900   | 40S ribosomal protein S3                                             | -0.93 | 1398.73 | 828.46  |
| PF3D7_1466000   | conserved Plasmodium protein, unknown function                       | 0.05  | 0.88    | 1.03    |
| PF3D7_1466100   | protein phosphatase containing kelch-like domains (PPKL)             | -0.66 | 7.18    | 5.13    |
| PF3D7_1466200   | conserved Plasmodium protein, unknown function                       | 0.02  | 15.86   | 18.14   |
| PF3D7_1466300   | 26S proteasome regulatory subunit RPN2, putative (RPN2)              | -0.52 | 189.67  | 149.32  |
| PF3D7_1466400   | transcription factor with AP2 domain(s) (ApiAP2)                     | -1.13 | 172.13  | 89.03   |
| PF3D7_1466500   | conserved Plasmodium protein, unknown function                       | -0.32 | 1.54    | 1.39    |
| PF3D7_1466600   | conserved Plasmodium protein, unknown function                       | -1.06 | 15.86   | 8.58    |
| PF3D7_1466700   | large ribosomal subunit assembling protein, putative                 | -0.95 | 40.73   | 23.79   |
| PF3D7_1466800   | conserved Plasmodium protein, unknown function                       | -0.16 | 44.14   | 44.66   |
| PF3D7_1466900   | rhopty protein, putative                                             | -1.24 | 61.59   | 29.35   |
| PF3D7_1467000   | conserved Plasmodium membrane protein, unknown function              | -1.27 | 4.97    | 2.33    |
| PF3D7_1467100   | DNA-3-methyladenine glycosylase, putative                            | -1.42 | 19.89   | 8.40    |
| PF3D7_1467200   | WD repeat-containing protein 79, putative (WDR79)                    | -1.97 | 27.96   | 8.05    |
| PF3D7_1467300   | 1-deoxy-D-xylulose 5-phosphate reductoisomerase (DXR)                | 0.16  | 15.82   | 19.98   |
| PF3D7_1467400   | 50S ribosomal protein L22, apicoplast, putative (L22)                | -0.60 | 25.64   | 19.16   |
| PF3D7_1467500   | DNA/RNA-binding protein KIN17, putative                              | -0.74 | 51.37   | 34.82   |
| PF3D7_1467600   | conserved Plasmodium protein, unknown function                       | 0.23  | 9.61    | 12.73   |
| PF3D7_1467700   | conserved Plasmodium protein, unknown function                       | -0.50 | 16.64   | 13.31   |
| PF3D7_1467800   | conserved Plasmodium protein, unknown function                       | 1.15  | 12.47   | 31.48   |
| PF3D7_1467900   | rab GTPase activator, putative                                       | 1.45  | 30.34   | 93.81   |
| PF3D7_1468000   | conserved Plasmodium protein, unknown function                       | 0.83  | 1.24    | 2.48    |
| PF3D7_1468100   | conserved Plasmodium protein, unknown function                       | -0.62 | 345.38  | 253.26  |
| PF3D7_1468200   | conserved protein, unknown function                                  | -0.26 | 65.52   | 61.82   |
| PF3D7_1468300   | leucine-rich repeat protein (LRR14.1)                                | -1.33 | 4.03    | 1.79    |
| PF3D7_1468400   | zinc finger protein, putative (D13)                                  | 1.26  | 23.14   | 62.52   |
| PF3D7_1468500   | derlin-1 (DER1-1)                                                    | 0.48  | 24.69   | 38.83   |
| PF3D7_1468600   | aminophospholipid transporter, putative                              | 0.66  | 0.33    | 0.59    |
| PF3D7_1468700   | eukaryotic initiation factor 4A (eIF4A)                              | -0.93 | 1898.52 | 1122.01 |
| PF3D7_1468800   | splicing factor U2AF large subunit, putative (U2AF2)                 | -0.20 | 74.70   | 73.58   |
| PF3D7_1468900   | conserved Plasmodium protein, unknown function                       | -2.14 | 48.13   | 12.33   |
| PF3D7_1469000   | translation initiation factor IF-1 (IF1)                             | -0.43 | 18.40   | 15.44   |
| PF3D7_1469100   | conserved Plasmodium protein, unknown function                       | -1.79 | 22.54   | 7.37    |
| PF3D7_1469200   | shewanella-like protein phosphatase 1, putative (SHLP1)              | 1.69  | 19.11   | 69.65   |
| PF3D7_1469300   | small subunit rRNA processing KH domain protein, putative            | -1.29 | 81.90   | 37.89   |
| PF3D7_1469400   | nucleoside transporter 3, putative (NT3)                             | -0.31 | 16.47   | 14.97   |
| PF3D7_1469500   | conserved Plasmodium protein, unknown function                       | -1.22 | 4.88    | 2.36    |
| PF3D7_1469600   | biotin carboxylase subunit of acetyl CoA carboxylase, putative (ACC) | 0.40  | 3.39    | 5.04    |
| PF3D7_1469700   | mediator of RNA polymerase II transcription subunit 6, putative      | 0.84  | 4.17    | 8.45    |
| PF3D7_1469800   | conserved Plasmodium protein, unknown function                       | 0.55  | 41.34   | 68.19   |
| PF3D7_1469900   | conserved Plasmodium protein, unknown function                       | 0.60  | 10.09   | 17.31   |
| PF3D7_1470000   | autophagy-related protein 12, putative (ATG12)                       | 0.04  | 8.99    | 10.46   |
| PF3D7_1470100   | conserved Plasmodium protein, unknown function                       | -0.57 | 8.24    | 6.27    |
| PF3D7_1470200   | conserved Plasmodium protein, unknown function                       | -0.97 | 35.04   | 20.20   |
| PF3D7_1470300   | conserved Plasmodium protein, unknown function                       | -1.82 | 56.32   | 18.01   |
| PF3D7_1470400   | mitochondrial pyruvate carrier protein 2, putative (MPC2)            | -0.18 | 23.95   | 23.94   |

|               |                                                                       |       |         |        |
|---------------|-----------------------------------------------------------------------|-------|---------|--------|
| PF3D7_1470500 | phosphodiesterase delta, putative (PDEdelta)                          | 0.58  | 4.64    | 7.84   |
| PF3D7_1470600 | RAP protein, putative                                                 | -0.47 | 32.12   | 26.21  |
| PF3D7_1470700 | conserved Plasmodium protein, unknown function                        | -0.63 | 18.88   | 13.77  |
| PF3D7_1470800 | conserved Plasmodium protein, unknown function                        | 0.36  | 9.91    | 14.37  |
| PF3D7_1470900 | proteasome subunit beta type-2, putative                              | 0.04  | 120.95  | 140.81 |
| PF3D7_1471000 | RNA 3'-terminal phosphate cyclase-like protein, putative              | -0.96 | 38.45   | 22.28  |
| PF3D7_1471100 | exported protein 2 (EXP2)                                             | 0.54  | 376.83  | 618.32 |
| PF3D7_1471200 | inorganic anion exchanger, inorganic anion antiporter (SulP)          | 0.15  | 79.57   | 99.68  |
| PF3D7_1471300 | conserved Plasmodium protein, unknown function                        | 0.71  | 5.77    | 10.67  |
| PF3D7_1471400 | diacylglycerol kinase, putative                                       | 0.67  | 30.09   | 54.08  |
| PF3D7_1471500 | conserved Plasmodium membrane protein, unknown function               | 0.70  | 3.99    | 7.32   |
| PF3D7_1471600 | conserved Plasmodium protein, unknown function                        | 1.33  | 0.58    | 1.67   |
| PF3D7_1471700 | conserved Plasmodium protein, unknown function                        | 1.09  | 0.83    | 2.02   |
| PF3D7_1471800 | conserved Plasmodium protein, unknown function                        | -0.49 | 7.67    | 6.17   |
| PF3D7_1471900 | conserved Plasmodium protein, unknown function                        | -1.49 | 13.94   | 5.60   |
| PF3D7_1472000 | pre-mRNA-splicing factor ISY1, putative                               | -0.96 | 42.99   | 24.99  |
| PF3D7_1472100 | protein transport protein YIP1, putative (YIP1)                       | -1.51 | 115.17  | 45.60  |
| PF3D7_1472200 | histone deacetylase, putative (HDA1)                                  | -1.33 | 201.60  | 90.50  |
| PF3D7_1472300 | conserved Plasmodium membrane protein, unknown function               | -0.21 | 42.95   | 41.84  |
| PF3D7_1472400 | M1-family alanyl aminopeptidase, putative                             | -0.58 | 10.74   | 8.09   |
| PF3D7_1472500 | conserved Plasmodium protein, unknown function                        | 0.54  | 3.78    | 6.23   |
| PF3D7_1472600 | protein disulfide-isomerase (PDI-14)                                  | 0.82  | 17.67   | 35.17  |
| PF3D7_1472700 | DNA-directed RNA polymerase, alpha subunit, putative                  | 0.69  | 10.21   | 18.65  |
| PF3D7_1472800 | conserved Plasmodium protein, unknown function                        | 0.78  | 18.93   | 36.64  |
| PF3D7_1472900 | dihydroorotase, putative                                              | -0.35 | 21.88   | 19.40  |
| PF3D7_1473000 | conserved Plasmodium protein, unknown function                        | -2.55 | 0.47    | 0.05   |
| PF3D7_1473100 | GTPase-activating protein, putative                                   | -0.82 | 24.25   | 15.52  |
| PF3D7_1473200 | DnaJ protein, putative                                                | 0.03  | 140.72  | 162.35 |
| PF3D7_1473300 | conserved Plasmodium protein, unknown function                        | -0.05 | 1.47    | 1.60   |
| PF3D7_1473400 | conserved Plasmodium protein, unknown function                        | 2.42  | 8.74    | 52.99  |
| PF3D7_1473500 | conserved Plasmodium protein, unknown function                        | -1.72 | 48.69   | 16.73  |
| PF3D7_1473600 | conserved Plasmodium protein, unknown function                        | 2.47  | 2.99    | 19.04  |
| PF3D7_1473700 | nucleoporin NUP116/NSP16, putative (NUP116)                           | -0.19 | 27.97   | 27.63  |
| PF3D7_1473900 | conserved Plasmodium protein, unknown function                        | -1.67 | 92.42   | 32.84  |
| PF3D7_1474000 | probable protein, unknown function                                    | 2.00  | 5.91    | 26.69  |
| PF3D7_1474100 | mitochondrial ribosomal protein L20 precursor, putative               | 1.14  | 11.26   | 28.06  |
| PF3D7_1474200 | conserved Plasmodium membrane protein, unknown function               | 0.42  | 0.35    | 0.53   |
| PF3D7_1474300 | DNA repair metallo-beta-lactamase protein, putative                   | 0.11  | 2.19    | 2.68   |
| PF3D7_1474400 | conserved Plasmodium protein, unknown function                        | 0.61  | 1.41    | 2.43   |
| PF3D7_1474500 | splicing factor 3A subunit 1, putative (SF3A1)                        | -0.92 | 93.32   | 55.57  |
| PF3D7_1474600 | conserved Plasmodium membrane protein, unknown function               | -0.31 | 83.80   | 76.37  |
| PF3D7_1474700 | protein kinase, putative                                              | -1.18 | 7.13    | 3.55   |
| PF3D7_1474800 | proteasome subunit alpha type-1, putative                             | -0.77 | 189.01  | 124.89 |
| PF3D7_1474900 | trailer hitch homolog, putative (CITH)                                | -0.07 | 12.91   | 13.88  |
| PF3D7_1475000 | mediator complex subunit 31, putative                                 | -2.82 | 3.31    | 0.49   |
| PF3D7_1475100 | conserved Plasmodium protein, unknown function                        | -2.21 | 13.79   | 3.36   |
| PF3D7_1475200 | conserved protein, unknown function                                   | 0.26  | 4.06    | 5.51   |
| PF3D7_1475300 | cytochrome c oxidase assembly protein COX11, putative (COX11)         | 1.20  | 7.66    | 20.00  |
| PF3D7_1475400 | cysteine repeat modular protein 4 (CRMP4)                             | 2.00  | 0.20    | 0.93   |
| PF3D7_1475500 | LCCL domain-containing protein (CCp1)                                 | 0.91  | 1.94    | 4.13   |
| PF3D7_1475600 | bromodomain protein, putative                                         | -1.03 | 97.60   | 53.96  |
| PF3D7_1475700 | tubulin epsilon chain, putative                                       | 0.48  | 2.97    | 4.70   |
| PF3D7_1475800 | conserved Plasmodium protein, unknown function                        | 1.51  | 16.23   | 52.33  |
| PF3D7_1475900 | conserved Plasmodium protein, unknown function                        | 1.27  | 0.42    | 1.15   |
| PF3D7_1476000 | conserved Plasmodium protein, unknown function                        | -2.41 | 128.43  | 27.22  |
| PF3D7_1476100 | early transcribed membrane protein 14.2 (ETRAMP14.2)                  | -1.69 | 4.87    | 1.68   |
| PF3D7_1476200 | Plasmodium exported protein (PHISTb), unknown function                | -1.32 | 61.81   | 28.03  |
| PF3D7_1476300 | Plasmodium exported protein (PHISTb), unknown function                | 1.03  | 44.93   | 103.50 |
| PF3D7_1476400 | serine/threonine protein kinase, FIKK family, pseudogene (FIKK14)     | -1.43 | 54.66   | 22.98  |
| PF3D7_1476500 | probable protein, unknown function                                    | 1.48  | 13.58   | 42.93  |
| PF3D7_1476600 | Plasmodium exported protein, unknown function                         | 0.65  | 34.32   | 60.88  |
| PF3D7_1476700 | lysophospholipase, putative                                           | 0.03  | 2.00    | 2.31   |
| PF3D7_1476800 | lysophospholipase, putative                                           | -0.61 | 22.00   | 16.26  |
| PF3D7_1476900 | Plasmodium exported protein, unknown function, pseudogene             | 0.18  | 0.48    | 0.63   |
| PF3D7_1477000 | Plasmodium exported protein (hyp17), unknown function, pseudogene     | -1.15 | 68.60   | 34.83  |
| PF3D7_1477100 | Plasmodium exported protein (hyp6), unknown function                  | 0.99  | 0.69    | 1.60   |
| PF3D7_1477200 | Plasmodium exported protein (hyp15), unknown function                 | 1.93  | 0.54    | 2.45   |
| PF3D7_1477300 | Plasmodium exported protein (PHIST), unknown function (Pfg14-744)     | 1.02  | 0.40    | 0.95   |
| PF3D7_1477400 | Plasmodium exported protein (PHIST), unknown function                 | 1.05  | 0.44    | 1.07   |
| PF3D7_1477500 | Plasmodium exported protein (PHISTb), unknown function                | -1.52 | 272.97  | 107.81 |
| PF3D7_1477600 | surface-associated interspersed protein 14.1 (SURFIN 14.1) (SURF14.1) | 0.47  | 1.35    | 2.12   |
| PF3D7_1477700 | Plasmodium exported protein (PHISTa), unknown function (Pfg14-748)    | 1.26  | 0.95    | 2.60   |
| PF3D7_1477800 | acyl-CoA binding protein (ACBP)                                       | 1.49  | 18.54   | 59.04  |
| PF3D7_1477900 | acyl-CoA synthetase, pseudogene (ACS1b)                               | 0.87  | 1.42    | 2.95   |
| PF3D7_1478000 | Plasmodium exported protein (PHISTa), unknown function (GEXP17)       | -4.11 | 1079.43 | 70.55  |
| PF3D7_1478100 | Plasmodium exported protein (hyp13), unknown function                 | -3.78 | 54.95   | 4.48   |
| PF3D7_1478200 | Plasmodium exported protein, unknown function, pseudogene             | 1.95  | 0.00    | 0.12   |
| PF3D7_1478300 | Plasmodium exported protein, unknown function, pseudogene             | -0.38 | 0.08    | 0.07   |
| PF3D7_1478400 | Plasmodium exported protein, unknown function, pseudogene             | 3.62  | 0.00    | 0.24   |
| PF3D7_1478500 | Plasmodium exported protein (PHISTa), unknown function, pseudogene    | 0.59  | 0.51    | 0.88   |
| PF3D7_1478600 | EMP1-trafficking protein (PTP3)                                       | -0.02 | 73.25   | 81.49  |
| PF3D7_1478700 | Plasmodium exported protein, unknown function, pseudogene             | -0.38 | 0.00    | 0.00   |
| PF3D7_1478800 | Plasmodium exported protein, unknown function                         | -1.84 | 18.05   | 5.68   |
| PF3D7_1478900 | unspecified product                                                   | -1.38 | 87.80   | 37.97  |
| PF3D7_1479000 | acyl-CoA synthetase (ACS1a)                                           | -1.77 | 10.93   | 3.61   |
| PF3D7_1479100 | Plasmodium exported protein, unknown function                         | -3.04 | 2.65    | 0.34   |
| PF3D7_1479200 | Plasmodium exported protein (PHISTa), unknown function                | -5.55 | 131.28  | 3.15   |
| PF3D7_1479300 | Plasmodium exported protein (PHISTa), unknown function, pseudogene    | -3.18 | 0.16    | 0.00   |
| PF3D7_1479400 | rifin (RIF)                                                           | -2.49 | 0.25    | 0.04   |
| PF3D7_1479500 | stevor                                                                | -0.11 | 0.10    | 0.11   |
| PF3D7_1479600 | rifin (RIF)                                                           | 0.36  | 0.04    | 0.07   |
| PF3D7_1479700 | rifin (RIF)                                                           | 1.74  | 0.04    | 0.22   |
| PF3D7_1479800 | rifin (RIF)                                                           | 1.08  | 0.06    | 0.19   |
| PF3D7_1479900 | stevor                                                                | 1.04  | 0.05    | 0.15   |
| PF3D7_1480000 | rifin (RIF)                                                           | -0.51 | 0.22    | 0.17   |
| PF3D7_1480100 | erythrocyte membrane protein 1 (PEMP1), truncated, pseudogene         | 0.05  | 1.51    | 1.78   |
| PFC10_API0012 | unspecified product (sufB)                                            | -0.38 | 0.00    | 0.00   |
| PFC10_API0013 | unspecified product (ORF51)                                           | -0.38 | 0.00    | 0.00   |

|               |                                |       |      |       |
|---------------|--------------------------------|-------|------|-------|
| PFC10_API0014 | unspecified product (ORF101)   | -0.38 | 0.00 | 0.00  |
| PFC10_API0015 | unspecified product (rpoB)     | -0.38 | 0.00 | 0.00  |
| PFC10_API0016 | unspecified product (rpoC)     | -0.38 | 0.00 | 0.00  |
| PFC10_API0017 | unspecified product (rpoD)     | -0.38 | 0.00 | 0.00  |
| PFC10_API0018 | unspecified product (rps2)     | -0.38 | 0.00 | 0.00  |
| PFC10_API0019 | unspecified product (ORF105)   | -0.38 | 0.00 | 0.00  |
| PFC10_API0020 | unspecified product (ORF79)    | -0.38 | 0.00 | 0.00  |
| PFC10_API0022 | unspecified product (ORF129)   | -0.38 | 0.00 | 0.00  |
| PFC10_API0027 | unspecified product (ORF78)    | 1.53  | 0.28 | 1.15  |
| PFC10_API0028 | unspecified product (tufA)     | 3.34  | 2.91 | 33.46 |
| PFC10_API0029 | unspecified product (rps7)     | 1.04  | 0.89 | 2.14  |
| PFC10_API0030 | unspecified product (rps12)    | 3.58  | 2.37 | 32.75 |
| PFC10_API0031 | unspecified product (rpl36)    | -0.38 | 0.00 | 0.00  |
| PFC10_API0032 | unspecified product (ORF91)    | -0.38 | 0.00 | 0.00  |
| PFC10_API0033 | unspecified product (rps5)     | 0.62  | 0.06 | 0.14  |
| PFC10_API0034 | unspecified product (rpl6)     | -0.38 | 0.00 | 0.00  |
| PFC10_API0035 | unspecified product (rps8)     | -0.38 | 0.00 | 0.00  |
| PFC10_API0036 | unspecified product (rpl14)    | -0.38 | 0.00 | 0.00  |
| PFC10_API0037 | unspecified product (rps17)    | -1.38 | 0.10 | 0.00  |
| PFC10_API0038 | unspecified product (rpl16)    | 0.21  | 0.52 | 0.70  |
| PFC10_API0039 | unspecified product (rps3)     | -1.38 | 0.03 | 0.00  |
| PFC10_API0040 | unspecified product (rps19)    | -0.38 | 0.16 | 0.14  |
| PFC10_API0041 | unspecified product (rpl2)     | 2.69  | 0.21 | 1.74  |
| PFC10_API0042 | unspecified product (rpl23)    | -0.38 | 0.00 | 0.00  |
| PFC10_API0043 | unspecified product (rpl4)     | 1.62  | 0.00 | 0.10  |
| PFC10_API0055 | unspecified product (rps4)     | -0.38 | 0.00 | 0.00  |
| PFC10_API0059 | unspecified product (rps11)    | 1.83  | 0.22 | 1.07  |
| PFC10_API0060 | unspecified product (Clp (C?)) | 4.77  | 0.07 | 2.40  |

Table 2, WRNA RNA -seq

| GeneSymbol      | [Product Description]                                                   | log2fdc_WRNA_12_16 | WT_12_16h_RPKM | WRNA_12_16h_RPKM |
|-----------------|-------------------------------------------------------------------------|--------------------|----------------|------------------|
| PF3D7_0100100   | erythrocyte membrane protein 1, PfEMP1 (VAR)                            | 0.89               | 6.20           | 10.36            |
| PF3D7_0100200   | rifin (RIF)                                                             | 0.71               | 2.59           | 3.82             |
| PF3D7_0100300   | erythrocyte membrane protein 1, PfEMP1 (VAR)                            | -3.28              | 3.36           | 0.31             |
| PF3D7_0100400   | rifin (RIF)                                                             | 1.15               | 3.90           | 7.82             |
| PF3D7_0100500   | erythrocyte membrane protein 1 (PfEMP1), exon 1, pseudogene             | 0.77               | 0.20           | 0.41             |
| PF3D7_0100600   | rifin (RIF)                                                             | 2.77               | 0.15           | 1.00             |
| PF3D7_0100700   | Plasmodium exported protein, unknown function, fragment                 | 0.19               | 0.00           | 0.00             |
| PF3D7_0100800   | rifin (RIF)                                                             | 1.41               | 0.04           | 0.13             |
| PF3D7_0100900   | rifin (RIF)                                                             | 0.67               | 0.19           | 0.28             |
| PF3D7_0101000   | rifin (RIF)                                                             | 1.77               | 0.10           | 0.36             |
| PF3D7_0101100   | exported protein family 4 (EPF4)                                        | -1.03              | 208.37         | 92.10            |
| PF3D7_0101200   | exported protein family 3 (EPF3)                                        | -0.70              | 87.72          | 48.72            |
| PF3D7_0101300   | Pfmc-2TM Maurer's cleft two transmembrane protein (MC-2TM)              | 2.62               | 1.27           | 7.16             |
| PF3D7_0101400   | exported protein family 1, pseudogene (EPF1)                            | -3.58              | 5.52           | 0.39             |
| PF3D7_0101500   | erythrocyte membrane protein 1 (PfEMP1), exon 2, pseudogene (VAR)       | 0.30               | 1.54           | 1.71             |
| PF3D7_0101600   | rifin (RIF)                                                             | 0.99               | 1.37           | 2.47             |
| PF3D7_0101700   | erythrocyte membrane protein 1 (PfEMP1), exon 2, pseudogene (VAR)       | 1.95               | 0.07           | 0.27             |
| PF3D7_0101800   | stevor                                                                  | 1.67               | 0.10           | 0.34             |
| PF3D7_0101900   | rifin (RIF)                                                             | 1.19               | 0.13           | 0.29             |
| PF3D7_0102000   | Plasmodium exported protein (PHISTa), unknown function, pseudogene      | 1.57               | 0.12           | 0.36             |
| PF3D7_0102100   | stevor, pseudogene                                                      | 0.00               | 0.64           | 0.57             |
| PF3D7_0102200   | ring-infected erythrocyte surface antigen (RESA)                        | 0.51               | 3564.38        | 4567.84          |
| PF3D7_0102300   | Plasmodium exported protein, unknown function                           | 0.55               | 29.23          | 38.58            |
| PF3D7_0102400   | lysophospholipase, putative, pseudogene                                 | -0.02              | 3.97           | 3.52             |
| PF3D7_0102500   | erythrocyte binding antigen-181 (EBA181)                                | 1.55               | 31.98          | 84.32            |
| PF3D7_0102600   | serine/threonine protein kinase, FIKK family (FIKK1)                    | -0.41              | 18.09          | 12.25            |
| PF3D7_0102700   | merozoite-associated tryptophan-rich antigen (MaTRA)                    | 0.15               | 31.35          | 31.43            |
| PF3D7_0102800   | conserved Plasmodium protein, unknown function                          | 0.13               | 0.61           | 0.61             |
| PF3D7_0102900   | aspartate--tRNA ligase                                                  | -0.84              | 119.87         | 60.24            |
| PF3D7_0103000   | vacuolar protein sorting-associated protein VTA1, putative              | 0.13               | 4.37           | 4.31             |
| PF3D7_0103100   | vacuolar protein sorting-associated protein 51, putative (VPS51)        | -0.59              | 6.31           | 3.79             |
| PF3D7_0103200   | nucleoside transporter 4 (NT4)                                          | -0.12              | 51.25          | 42.50            |
| PF3D7_0103300   | conserved Plasmodium protein, unknown function                          | -0.10              | 57.37          | 48.18            |
| PF3D7_0103400   | zinc-carboxypeptidase, putative                                         | 0.63               | 23.07          | 32.22            |
| PF3D7_0103500   | conserved Plasmodium protein, unknown function                          | 0.10               | 2.46           | 2.38             |
| PF3D7_0103600   | ATP-dependent RNA helicase, putative                                    | 0.41               | 5.09           | 6.11             |
| PF3D7_0103700   | L-seryl-tRNA(Sec) kinase, putative (PSTK)                               | -0.39              | 8.11           | 5.59             |
| PF3D7_0103800   | actin-related protein (ARP1)                                            | 0.73               | 9.84           | 14.73            |
| PF3D7_0103900   | parasite-infected erythrocyte surface protein (PIEPS15)                 | -0.04              | 12.28          | 10.78            |
| PF3D7_0104000   | thrombospondin-related sporozoite protein (TRSP)                        | 0.68               | 2.09           | 3.04             |
| PF3D7_0104100   | conserved Plasmodium membrane protein, unknown function                 | -0.07              | 9.32           | 8.02             |
| PF3D7_0104200   | StAR-related lipid transfer protein                                     | -0.14              | 77.40          | 63.45            |
| PF3D7_0104300   | ubiquitin carboxyl-terminal hydrolase 1, putative (UBP1)                | 0.10               | 105.35         | 101.73           |
| PF3D7_0104400   | 4-hydroxy-3-methylbut-2-enyl diphosphate reductase (LytB)               | 1.28               | 15.20          | 33.27            |
| PF3D7_0104500   | conserved protein, unknown function                                     | -0.86              | 71.76          | 35.76            |
| PF3D7_0104600   | conserved Plasmodium protein, unknown function                          | -0.41              | 3.30           | 2.25             |
| PF3D7_0104700   | transporter, putative                                                   | 1.48               | 0.20           | 0.52             |
| PF3D7_0104800   | novel putative transporter 1 (NPT1)                                     | 0.28               | 14.49          | 15.92            |
| PF3D7_0104900   | RNase MRP                                                               | -1.15              | 48.14          | 19.59            |
| PF3D7_0105000   | unspecified product                                                     | -1.39              | 42.56          | 14.66            |
| PF3D7_0105100   | conserved Plasmodium protein, unknown function                          | 1.01               | 4.10           | 7.46             |
| PF3D7_0105200   | RAP protein, putative                                                   | 0.37               | 15.67          | 18.21            |
| PF3D7_0105300   | cyclase-associated protein (CAP)                                        | -0.47              | 84.01          | 54.82            |
| PF3D7_0105400.1 | conserved Plasmodium protein, unknown function                          | 0.10               | 29.65          | 28.69            |
| PF3D7_0105400.2 | conserved Plasmodium protein, unknown function                          | 0.05               | 29.87          | 27.96            |
| PF3D7_0105500   | conserved Plasmodium protein, unknown function                          | 0.18               | 2.32           | 2.36             |
| PF3D7_0105600   | conserved Plasmodium protein, unknown function                          | -0.88              | 28.25          | 13.82            |
| PF3D7_0105700   | asparagine-rich antigen Pfa35-2                                         | 1.14               | 9.07           | 17.97            |
| PF3D7_0105800   | conserved Plasmodium protein, unknown function                          | 0.31               | 33.18          | 37.02            |
| PF3D7_0105900   | DNA binding protein, putative                                           | 0.55               | 4.17           | 5.52             |
| PF3D7_0106000   | conserved Plasmodium protein, unknown function                          | -0.25              | 22.75          | 17.23            |
| PF3D7_0106100   | V-type proton ATPase subunit C, putative                                | -0.50              | 51.97          | 33.17            |
| PF3D7_0106200   | conserved Plasmodium protein, unknown function                          | -1.26              | 9.13           | 3.41             |
| PF3D7_0106300   | calcium-transporting ATPase (ATP6)                                      | -0.23              | 199.11         | 153.30           |
| PF3D7_0106400   | pre-rRNA-processing protein TSR2, putative                              | -0.36              | 152.04         | 107.23           |
| PF3D7_0106500   | conserved Plasmodium protein, unknown function                          | 0.36               | 4.65           | 5.39             |
| PF3D7_0106600   | conserved Plasmodium protein, unknown function                          | 1.53               | 0.90           | 2.38             |
| PF3D7_0106700   | small ribosomal subunit assembling AARP2 protein (AARP2)                | -0.18              | 144.35         | 114.66           |
| PF3D7_0106800   | ras-related protein Rab-5C (RAB5c)                                      | 0.07               | 22.61          | 21.39            |
| PF3D7_0106900   | 2-C-methyl-D-erythritol 4-phosphate cytidyltransferase, putative (IspD) | -0.64              | 6.97           | 4.02             |
| PF3D7_0107000   | centrin-1 (CEN1)                                                        | 1.51               | 30.57          | 78.63            |
| PF3D7_0107100   | conserved Plasmodium protein, unknown function                          | 0.76               | 1.19           | 1.83             |
| PF3D7_0107200   | carbon catabolite repressor protein 4, putative                         | 1.61               | 1.55           | 4.29             |
| PF3D7_0107300   | probable protein, unknown function                                      | 2.32               | 1.12           | 5.10             |
| PF3D7_0107400   | conserved Plasmodium protein, unknown function                          | 0.51               | 10.62          | 13.61            |
| PF3D7_0107500   | lipid/sterol:H <sup>+</sup> symporter                                   | -1.19              | 484.49         | 192.20           |
| PF3D7_0107600   | serine/threonine protein kinase, putative                               | 1.44               | 0.22           | 0.54             |
| PF3D7_0107700   | conserved Plasmodium membrane protein, unknown function                 | 0.19               | 1.42           | 1.46             |
| PF3D7_0107800   | double-strand break repair protein MRE11 (MRE11)                        | 0.00               | 5.87           | 5.29             |
| PF3D7_0107900   | conserved Plasmodium protein, unknown function                          | -0.57              | 11.98          | 7.29             |
| PF3D7_0108000   | proteasome subunit beta type-3, putative                                | 0.53               | 166.79         | 216.98           |
| PF3D7_0108100   | conserved Plasmodium protein, unknown function                          | -0.60              | 2.97           | 1.76             |
| PF3D7_0108300   | conserved Plasmodium protein, unknown function                          | -0.34              | 449.65         | 321.47           |
| PF3D7_0108400.1 | mitochondrial carrier protein, putative                                 | 0.05               | 19.94          | 18.67            |
| PF3D7_0108400.2 | mitochondrial carrier protein, putative                                 | -0.21              | 18.90          | 14.78            |
| PF3D7_0108500   | conserved Plasmodium protein, unknown function                          | 0.60               | 3164.61        | 4330.20          |
| PF3D7_0108600   | conserved Plasmodium protein, unknown function                          | 0.55               | 7.49           | 9.93             |
| PF3D7_0108700   | secreted ookinete protein, putative (PSOP24)                            | -0.15              | 86.44          | 70.05            |
| PF3D7_0108800   | conserved Plasmodium protein, unknown function                          | -0.16              | 14.42          | 11.61            |
| PF3D7_0108900   | unspecified product                                                     | 0.87               | 2.87           | 4.76             |
| PF3D7_0109000   | photosensitized INA-labeled protein PHIL1, putative (PHIL1)             | 1.31               | 55.88          | 124.84           |
| PF3D7_0109100   | LCCL domain-containing protein (CCp5)                                   | 0.13               | 6.71           | 6.65             |
| PF3D7_0109200   | mRNA cleavage factor-like protein, putative                             | -0.22              | 20.48          | 15.88            |
| PF3D7_0109300   | fatty acid elongation protein, GNS1/SUR4 family, putative               | 0.07               | 4.51           | 4.25             |
| PF3D7_0109400   | tubulin-specific chaperone a, putative                                  | 1.50               | 17.93          | 45.78            |
| PF3D7_0109500   | N-acetyltransferase, putative                                           | -0.27              | 71.65          | 53.69            |

|                 |                                                                                |       |          |         |
|-----------------|--------------------------------------------------------------------------------|-------|----------|---------|
| PF3D7_0109600   | cold-shock protein, putative                                                   | -0.89 | 15.77    | 7.68    |
| PF3D7_0109700   | conserved protein, unknown function                                            | -1.23 | 47.96    | 18.48   |
| PF3D7_0109800   | phenylalanine-tRNA ligase alpha subunit                                        | -0.97 | 107.03   | 49.39   |
| PF3D7_0109900.1 | unspecified product                                                            | -0.16 | 6.88     | 5.55    |
| PF3D7_0109900.2 | unspecified product                                                            | -0.19 | 6.90     | 5.45    |
| PF3D7_0110000   | conserved Plasmodium protein, unknown function                                 | 1.37  | 22.69    | 52.85   |
| PF3D7_0110100   | selenocysteine-specific elongation factor selB homologue, putative             | -0.37 | 16.67    | 11.63   |
| PF3D7_0110200   | FAD-linked sulfhydryl oxidase ERV1, putative (ERV1)                            | 0.43  | 8.09     | 9.81    |
| PF3D7_0110300   | Plasmodium RNA of unknown function RUF5                                        | -1.62 | 2.20     | 0.59    |
| PF3D7_0110400   | DNA-directed RNA polymerase 2, putative                                        | 0.08  | 124.99   | 119.36  |
| PF3D7_0110500   | bromodomain protein, putative                                                  | 0.31  | 19.74    | 22.11   |
| PF3D7_0110600   | phosphatidylinositol-4-phosphate 5-kinase (PIP5K)                              | -0.92 | 180.23   | 86.11   |
| PF3D7_0110700   | chromatin assembly factor 1 protein WD40 domain, putative                      | 1.14  | 27.74    | 55.13   |
| PF3D7_0110800   | transcription initiation factor TFIIB, putative                                | 0.05  | 145.54   | 135.59  |
| PF3D7_0110900   | adenylate kinase-like protein 1 (AKLP1)                                        | -1.22 | 14.41    | 5.54    |
| PF3D7_0111000   | kinesin-8, putative                                                            | 0.07  | 18.80    | 17.83   |
| PF3D7_0111200   | conserved Plasmodium protein, unknown function                                 | 0.00  | 2.36     | 2.12    |
| PF3D7_0111300   | replication factor c protein, putative                                         | 0.64  | 8.00     | 11.27   |
| PF3D7_0111400   | conserved Plasmodium protein, unknown function (GEXP19)                        | 0.08  | 7.70     | 7.32    |
| PF3D7_0111500   | UMP-CMP kinase, putative                                                       | -0.14 | 41.03    | 33.70   |
| PF3D7_0111600   | conserved Plasmodium protein, unknown function                                 | -2.29 | 3.81     | 0.68    |
| PF3D7_0111700   | conserved Plasmodium protein, unknown function                                 | -3.40 | 0.70     | 0.00    |
| PF3D7_0111800   | conserved Plasmodium protein, unknown function                                 | -0.04 | 18.30    | 16.08   |
| PF3D7_0111900   | conserved protein, unknown function                                            | -0.77 | 24.04    | 12.64   |
| PF3D7_0112000   | TatD-like deoxyribonuclease, putative                                          | -0.47 | 19.05    | 12.37   |
| PF3D7_0112100   | conserved Plasmodium protein, unknown function                                 | -0.05 | 2.69     | 2.34    |
| PF3D7_0112200   | multidrug resistance-associated protein 1 (MRP1)                               | 0.06  | 9.24     | 8.70    |
| PF3D7_0112300   | 18S ribosomal RNA                                                              | 2.70  | 15.47    | 90.46   |
| PF3D7_0112400   | unspecified product                                                            | 2.19  | 0.00     | 0.18    |
| PF3D7_0112500   | 5.8S ribosomal RNA                                                             | 1.19  | 0.37     | 0.95    |
| PF3D7_0112600   | unspecified product                                                            | 2.30  | 0.20     | 1.00    |
| PF3D7_0112700   | 28S ribosomal RNA                                                              | 3.05  | 15.67    | 117.49  |
| PF3D7_0112800   | Plasmodium exported protein (hyp11), unknown function                          | -0.61 | 20.97    | 12.34   |
| PF3D7_0112900   | Plasmodium exported protein, unknown function                                  | -1.27 | 7.03     | 2.60    |
| PF3D7_0113000   | glutamic acid-rich protein (GARP)                                              | -0.17 | 825.39   | 661.00  |
| PF3D7_0113100   | surface-associated interspersed protein 1.1 (SURFIN 1.1) (SURF1.1)             | 2.01  | 0.53     | 1.92    |
| PF3D7_0113200   | Plasmodium exported protein, unknown function                                  | 0.39  | 22.82    | 26.97   |
| PF3D7_0113300   | Plasmodium exported protein (hyp1), unknown function                           | -0.43 | 176.57   | 118.59  |
| PF3D7_0113400   | Plasmodium exported protein, unknown function                                  | 0.96  | 2.80     | 4.94    |
| PF3D7_0113600   | surface-associated interspersed protein 1.2 (SURFIN 1.2), pseudogene (SURF1.2) | 0.07  | 3.33     | 3.16    |
| PF3D7_0113700   | heat shock protein 40, type II (HSP40)                                         | -0.69 | 266.00   | 148.54  |
| PF3D7_0113800   | DBL containing protein, unknown function                                       | -1.82 | 413.91   | 105.48  |
| PF3D7_0113900   | Plasmodium exported protein (hyp8), unknown function (GEXP10)                  | -1.15 | 114.78   | 46.63   |
| PF3D7_0114000   | exported protein family 1 (EPF1)                                               | 2.74  | 7.42     | 44.82   |
| PF3D7_0114100   | Pfmc-2TM Maurer's cleft two transmembrane protein (MC-2TM)                     | 2.69  | 3.34     | 19.66   |
| PF3D7_0114200   | exported protein family 3 (EPF3)                                               | 1.19  | 0.19     | 0.42    |
| PF3D7_0114300   | exported protein family 4, pseudogene (EPF4)                                   | 1.23  | 0.75     | 1.61    |
| PF3D7_0114400   | erythrocyte membrane protein 1 (PfEMP1), exon 2, pseudogene (VAR)              | -0.51 | 0.19     | 0.12    |
| PF3D7_0114500   | Plasmodium exported protein (hyp10), unknown function                          | 0.03  | 1.21     | 1.11    |
| PF3D7_0114600   | stevor, pseudogene                                                             | -0.59 | 0.26     | 0.15    |
| PF3D7_0114700   | rifin (RIF)                                                                    | -1.58 | 0.37     | 0.09    |
| PF3D7_0114800   | Plasmodium exported protein (hyp7), unknown function                           | -2.68 | 4.88     | 0.65    |
| PF3D7_0114900   | Plasmodium exported protein, unknown function, pseudogene                      | -0.63 | 0.77     | 0.43    |
| PF3D7_0115000   | surface-associated interspersed protein 1.3 (SURFIN 1.3) (SURF1.3)             | 1.07  | 1.16     | 2.21    |
| PF3D7_0115100   | Plasmodium exported protein (PHISTa), unknown function                         | 1.14  | 1.52     | 3.06    |
| PF3D7_0115200   | rifin (RIF)                                                                    | 0.19  | 0.10     | 0.10    |
| PF3D7_0115300   | rifin (RIF)                                                                    | 2.45  | 0.09     | 0.52    |
| PF3D7_0115400   | stevor                                                                         | 2.39  | 0.10     | 0.56    |
| PF3D7_0115500   | erythrocyte membrane protein 1 (PfEMP1), pseudogene                            | -0.55 | 0.24     | 0.14    |
| PF3D7_0115600   | rifin (RIF)                                                                    | 1.91  | 3.12     | 10.65   |
| PF3D7_0115700   | erythrocyte membrane protein 1, PfEMP1 (VAR)                                   | 0.45  | 0.81     | 1.00    |
| PF3D7_0200100   | erythrocyte membrane protein 1, PfEMP1 (VAR)                                   | 0.96  | 3.46     | 6.08    |
| PF3D7_0200200   | rifin (RIF)                                                                    | 0.47  | 7.91     | 9.88    |
| PF3D7_0200300   | erythrocyte membrane protein 1 (PfEMP1), exon 2                                | 2.05  | 0.52     | 2.00    |
| PF3D7_0200400   | stevor                                                                         | 0.19  | 0.00     | 0.00    |
| PF3D7_0200500   | rifin (RIF)                                                                    | 1.77  | 0.00     | 0.04    |
| PF3D7_0200600   | rifin (RIF)                                                                    | 0.93  | 0.04     | 0.08    |
| PF3D7_0200700   | rifin (RIF)                                                                    | 3.77  | 0.00     | 0.26    |
| PF3D7_0200800   | erythrocyte membrane protein 1 (PfEMP1), exon 2, pseudogene                    | 0.19  | 0.02     | 0.02    |
| PF3D7_0200900   | stevor, pseudogene                                                             | 0.19  | 0.10     | 0.10    |
| PF3D7_0201000   | rifin (RIF)                                                                    | 0.19  | 0.05     | 0.05    |
| PF3D7_0201100   | Plasmodium exported protein, unknown function, fragment                        | 0.19  | 0.00     | 0.00    |
| PF3D7_0201200   | rifin (RIF)                                                                    | 1.77  | 0.04     | 0.17    |
| PF3D7_0201300   | stevor                                                                         | 2.11  | 0.10     | 0.45    |
| PF3D7_0201400   | Plasmodium exported protein (hyp10), unknown function                          | 3.00  | 0.00     | 0.29    |
| PF3D7_0201500   | Plasmodium exported protein (hyp9), unknown function                           | 1.00  | 13.26    | 24.02   |
| PF3D7_0201600   | PHISTb domain-containing RESA-like protein 1 (RLP1)                            | -0.85 | 214.81   | 107.30  |
| PF3D7_0201700   | DnaJ protein, putative                                                         | 0.13  | 289.56   | 285.29  |
| PF3D7_0201800   | knob associated heat shock protein 40 (KAHsp40)                                | -0.31 | 356.34   | 259.79  |
| PF3D7_0201900   | erythrocyte membrane protein 3 (EMP3)                                          | -1.37 | 1705.52  | 594.65  |
| PF3D7_0202000   | knob-associated histidine-rich protein (KAHRP)                                 | -0.76 | 18659.40 | 9921.69 |
| PF3D7_0202100   | liver stage associated protein 2 (LSAP2)                                       | 0.47  | 259.97   | 325.44  |
| PF3D7_0202200   | EMP1-trafficking protein (PTP1)                                                | -0.74 | 706.58   | 382.28  |
| PF3D7_0202300   | Plasmodium exported protein (hyp11), unknown function                          | 0.17  | 4.04     | 4.10    |
| PF3D7_0202400   | gamete antigen 27/25, putative                                                 | 0.51  | 48.22    | 62.08   |
| PF3D7_0202500   | early transcribed membrane protein 2 (ETRAPM2)                                 | -0.78 | 4801.55  | 2518.45 |
| PF3D7_0202600.1 | conserved Plasmodium protein, unknown function                                 | 0.13  | 21.01    | 20.70   |
| PF3D7_0202600.2 | conserved Plasmodium protein, unknown function                                 | 0.13  | 21.02    | 20.71   |
| PF3D7_0202700   | octaprenyl pyrophosphate synthase (OPP)                                        | 0.14  | 4.29     | 4.26    |
| PF3D7_0202800   | conserved Plasmodium protein, unknown function                                 | 0.44  | 4.13     | 5.08    |
| PF3D7_0202900   | palmitoyltransferase, putative (DHHC12)                                        | -0.14 | 5.52     | 4.53    |
| PF3D7_0203000   | repetitive organellar protein, putative (ROPE)                                 | 0.92  | 15.42    | 26.23   |
| PF3D7_0203100   | protein kinase, putative                                                       | 1.39  | 6.07     | 14.41   |
| PF3D7_0203200   | conserved Plasmodium protein, unknown function                                 | -1.04 | 37.76    | 16.59   |
| PF3D7_0203300   | ERCC1 nucleotide excision repair protein, putative (ERCC1)                     | -0.32 | 11.98    | 8.66    |
| PF3D7_0203400   | conserved Plasmodium protein, unknown function                                 | 1.08  | 19.07    | 36.46   |
| PF3D7_0203500   | tRNA Glutamine                                                                 | 1.19  | 0.00     | 0.32    |
| PF3D7_0203600   | conserved Plasmodium protein, unknown function                                 | -0.47 | 3.17     | 2.06    |

|                 |                                                                      |       |         |         |
|-----------------|----------------------------------------------------------------------|-------|---------|---------|
| PF3D7_0203700   | protein MAK16, putative (MAK16)                                      | 0.13  | 221.45  | 218.42  |
| PF3D7_0203800   | conserved Plasmodium protein, unknown function                       | 1.06  | 2.60    | 4.91    |
| PF3D7_0203900   | 5'-3' exonuclease, N-terminal resolvase-like domain, putative        | 1.25  | 4.90    | 10.53   |
| PF3D7_0204000   | conserved Plasmodium protein, unknown function                       | 0.37  | 1.97    | 2.31    |
| PF3D7_0204100   | conserved Plasmodium protein, unknown function                       | -0.03 | 31.58   | 27.88   |
| PF3D7_0204200   | conserved Plasmodium protein, unknown function                       | 0.09  | 123.19  | 118.09  |
| PF3D7_0204300   | conserved Plasmodium protein, unknown function                       | -1.13 | 75.68   | 31.29   |
| PF3D7_0204400   | dynein light chain, putative                                         | -0.74 | 19.22   | 10.38   |
| PF3D7_0204500   | aspartate transaminase (AspAT)                                       | -0.30 | 67.00   | 49.20   |
| PF3D7_0204600   | conserved Plasmodium protein, unknown function                       | -0.09 | 5.38    | 4.55    |
| PF3D7_0204700   | hexose transporter (HT)                                              | -0.36 | 282.22  | 198.68  |
| PF3D7_0204800   | 3'-5' exonuclease, putative                                          | 0.02  | 5.60    | 5.14    |
| PF3D7_0204900   | ubiE/COQ5 methyltransferase, putative                                | 0.74  | 7.87    | 11.87   |
| PF3D7_0205000   | conserved Plasmodium protein, unknown function                       | 0.46  | 1.58    | 1.98    |
| PF3D7_0205100   | conserved Plasmodium protein, unknown function                       | 1.44  | 1.10    | 2.71    |
| PF3D7_0205200   | conserved Plasmodium protein, unknown function                       | 1.85  | 1.17    | 3.90    |
| PF3D7_0205300   | conserved Plasmodium protein, unknown function                       | 1.35  | 0.39    | 0.91    |
| PF3D7_0205400   | PCI domain-containing protein, putative                              | -0.80 | 42.57   | 22.07   |
| PF3D7_0205500   | DNA-directed RNA polymerase II 16 kDa subunit, putative              | 0.34  | 72.76   | 83.12   |
| PF3D7_0205600   | conserved Plasmodium protein, unknown function                       | -0.35 | 12.69   | 8.99    |
| PF3D7_0205700.1 | conserved Plasmodium protein, unknown function                       | -0.50 | 60.89   | 38.91   |
| PF3D7_0205700.2 | conserved Plasmodium protein, unknown function                       | -0.50 | 56.28   | 36.01   |
| PF3D7_0205800   | conserved Plasmodium protein, unknown function                       | 0.47  | 11.91   | 14.85   |
| PF3D7_0205900   | 26S proteasome regulatory subunit RPN1, putative (RPN1)              | 0.19  | 104.96  | 107.95  |
| PF3D7_0206000   | DNA repair protein RAD2, putative (RAD2)                             | -0.22 | 46.39   | 36.06   |
| PF3D7_0206100   | cysteine desulfuration protein SufE (SufE)                           | 0.05  | 45.13   | 42.07   |
| PF3D7_0206200   | pantothenate transporter (PAT)                                       | 0.61  | 26.16   | 35.97   |
| PF3D7_0206300   | pentafunctional AROM polypeptide, putative, pseudogene (AROM)        | 0.22  | 33.64   | 35.41   |
| PF3D7_0206500   | conserved Plasmodium protein, unknown function                       | -1.02 | 127.91  | 56.81   |
| PF3D7_0206600   | DNA-directed RNA polymerase III subunit RPC10, putative              | -0.98 | 22.54   | 10.26   |
| PF3D7_0206700   | adenylosuccinate lyase (ASL)                                         | 0.02  | 85.96   | 78.51   |
| PF3D7_0206800   | merozoite surface protein 2 (MSP2)                                   | 1.47  | 813.36  | 2029.60 |
| PF3D7_0206900.1 | merozoite surface protein 5 (MSP5)                                   | 2.12  | 20.70   | 81.07   |
| PF3D7_0206900.2 | merozoite surface protein 5 (MSP5)                                   | 2.11  | 21.40   | 83.62   |
| PF3D7_0207000   | merozoite surface protein 4 (MSP4)                                   | 1.19  | 154.47  | 318.01  |
| PF3D7_0207100   | conserved Plasmodium protein, unknown function                       | 1.38  | 18.05   | 42.27   |
| PF3D7_0207200   | iron-sulfur assembly protein, putative (IscA1)                       | 1.24  | 7.19    | 15.40   |
| PF3D7_0207300   | serine repeat antigen 8 (SERA8)                                      | 3.18  | 0.24    | 2.05    |
| PF3D7_0207400   | serine repeat antigen 7 (SERA7)                                      | 0.47  | 48.05   | 60.24   |
| PF3D7_0207500   | serine repeat antigen 6 (SERA6)                                      | 0.22  | 81.92   | 85.88   |
| PF3D7_0207600   | serine repeat antigen 5 (SERA5)                                      | -0.72 | 744.09  | 408.70  |
| PF3D7_0207700   | serine repeat antigen 4 (SERA4)                                      | -0.28 | 52.80   | 39.33   |
| PF3D7_0207800   | serine repeat antigen 3 (SERA3)                                      | 0.17  | 40.83   | 41.30   |
| PF3D7_0207900   | serine repeat antigen 2 (SERA2)                                      | 1.28  | 11.51   | 25.18   |
| PF3D7_0208000   | serine repeat antigen 1 (SERA1)                                      | 0.48  | 22.64   | 28.52   |
| PF3D7_0208100.1 | conserved Plasmodium protein, unknown function                       | 0.66  | 11.73   | 16.68   |
| PF3D7_0208100.2 | unspecified product                                                  | 0.66  | 11.72   | 16.67   |
| PF3D7_0208200   | KRR1 small subunit processome component, putative (KRR1)             | -0.29 | 144.42  | 106.35  |
| PF3D7_0208300   | conserved Plasmodium protein, unknown function                       | -1.23 | 23.06   | 8.86    |
| PF3D7_0208400   | conserved Plasmodium protein, unknown function                       | -0.78 | 29.54   | 15.48   |
| PF3D7_0208500   | acyl carrier protein (ACP)                                           | 0.42  | 11.04   | 13.30   |
| PF3D7_0208600   | ribosome-recycling factor (RRF1)                                     | 0.71  | 16.12   | 23.78   |
| PF3D7_0208700.1 | conserved Plasmodium protein, unknown function                       | -0.15 | 45.92   | 37.27   |
| PF3D7_0208700.2 | conserved Plasmodium protein, unknown function                       | -0.08 | 47.31   | 40.48   |
| PF3D7_0208800   | conserved Plasmodium protein, unknown function                       | -1.65 | 22.78   | 6.51    |
| PF3D7_0208900   | 6-cysteine protein (P230p)                                           | 0.66  | 0.43    | 0.61    |
| PF3D7_0209000   | 6-cysteine protein (P230)                                            | 1.84  | 0.49    | 1.57    |
| PF3D7_0209100   | phospholipase A2, putative                                           | -0.03 | 71.81   | 63.64   |
| PF3D7_0209200   | 3'exoribonuclease, putative                                          | 0.13  | 51.35   | 50.59   |
| PF3D7_0209300   | 2C-methyl-D-erythritol 2,4-cyclodiphosphate synthase (IspF)          | -0.45 | 16.48   | 10.86   |
| PF3D7_0209400   | conserved protein, unknown function                                  | 0.55  | 18.74   | 24.75   |
| PF3D7_0209500   | conserved Plasmodium protein, unknown function                       | 1.62  | 3.28    | 9.12    |
| PF3D7_0209600   | transporter, putative                                                | -0.27 | 17.10   | 12.76   |
| PF3D7_0209700   | RING zinc finger protein, putative                                   | -0.36 | 211.89  | 149.15  |
| PF3D7_0209800   | ATP-dependent RNA helicase UAP56 (UAP56)                             | -0.25 | 660.37  | 500.86  |
| PF3D7_0209900   | unspecified product                                                  | -1.69 | 8.19    | 2.26    |
| PF3D7_0210000   | secretory complex protein 61 gamma subunit (Sec61-gamma)             | -0.11 | 289.83  | 241.82  |
| PF3D7_0210100.1 | 60S ribosomal protein L37ae, putative                                | 1.12  | 784.22  | 1536.84 |
| PF3D7_0210100.2 | 60S ribosomal protein L37ae, putative                                | 1.11  | 1290.05 | 2508.99 |
| PF3D7_0210200   | conserved Plasmodium protein, unknown function                       | 0.43  | 13.75   | 16.75   |
| PF3D7_0210300   | monocarboxylate transporter, putative                                | 0.27  | 16.74   | 18.22   |
| PF3D7_0210400   | 50S ribosomal protein L33, putative                                  | 1.16  | 3.61    | 7.36    |
| PF3D7_0210500   | conserved Plasmodium protein, unknown function                       | -0.09 | 2.27    | 1.93    |
| PF3D7_0210600   | conserved Plasmodium protein, unknown function                       | 1.46  | 27.54   | 68.28   |
| PF3D7_0210700   | syntaxin, Qa-SNARE family (SYN17)                                    | 0.26  | 9.17    | 9.94    |
| PF3D7_0210800   | conserved Plasmodium protein, unknown function                       | -0.63 | 61.13   | 35.73   |
| PF3D7_0210900   | conserved Plasmodium protein, unknown function                       | -0.37 | 345.58  | 241.86  |
| PF3D7_0211000   | unspecified product                                                  | -1.07 | 12.81   | 5.49    |
| PF3D7_0211100   | conserved Plasmodium protein, unknown function                       | 0.21  | 0.50    | 0.52    |
| PF3D7_0211200   | ras-related protein Rab-5A (RAB5a)                                   | -0.22 | 9.27    | 7.16    |
| PF3D7_0211300   | ubiquinol-cytochrome-c reductase complex assembly factor 1, putative | -0.40 | 5.33    | 3.64    |
| PF3D7_0211400   | beta-ketoacyl-ACP synthase III (KASIII)                              | 1.13  | 1.45    | 2.87    |
| PF3D7_0211500   | GAF domain-related protein, putative                                 | 0.75  | 3.84    | 5.82    |
| PF3D7_0211600   | dolichol-linked oligosaccharide biosynthesis enzyme, putative        | -0.55 | 7.36    | 4.53    |
| PF3D7_0211700   | tyrosine kinase-like protein, putative (TKL1)                        | 0.48  | 4.19    | 5.28    |
| PF3D7_0211800   | asparagine-tRNA ligase (AsnRS)                                       | -0.33 | 176.06  | 126.22  |
| PF3D7_0211900   | conserved Plasmodium protein, unknown function                       | 0.16  | 8.11    | 8.19    |
| PF3D7_0212000   | GDP-fructose:GMP antiporter, putative                                | 0.20  | 6.29    | 6.54    |
| PF3D7_0212100   | conserved Plasmodium protein, unknown function                       | -0.78 | 75.42   | 39.58   |
| PF3D7_0212200   | mitochondrial ribosomal protein L12 precursor, putative              | -0.23 | 19.31   | 14.87   |
| PF3D7_0212300   | peptide chain release factor subunit 1, putative                     | -0.19 | 311.28  | 246.19  |
| PF3D7_0212400   | conserved Plasmodium membrane protein, unknown function              | -1.04 | 21.27   | 9.33    |
| PF3D7_0212500   | conserved Plasmodium protein, unknown function                       | -0.66 | 52.15   | 29.72   |
| PF3D7_0212600   | secreted protein with altered thrombospondin repeat domain (SPATR)   | 2.15  | 23.74   | 95.24   |
| PF3D7_0212700   | SRR1-like protein                                                    | -0.05 | 7.13    | 6.22    |
| PF3D7_0212800   | multidrug efflux pump, putative                                      | 0.75  | 4.60    | 6.99    |
| PF3D7_0212900   | Leu/Phe-tRNA protein transferase, putative                           | 0.34  | 46.23   | 52.65   |
| PF3D7_0213000   | conserved Plasmodium protein, unknown function                       | 0.39  | 14.62   | 17.33   |



|                 |                                                                  |       |         |        |
|-----------------|------------------------------------------------------------------|-------|---------|--------|
| PF3D7_0213100   | protein SIS1 (SIS1)                                              | 0.61  | 100.13  | 138.06 |
| PF3D7_0213200   | conserved Plasmodium protein, unknown function                   | 0.97  | 5.64    | 10.03  |
| PF3D7_0213300   | conserved Plasmodium protein, unknown function                   | 0.34  | 3.31    | 3.79   |
| PF3D7_0213400   | protein kinase 7 (PK7)                                           | 0.57  | 6.95    | 9.31   |
| PF3D7_0213500   | conserved Plasmodium protein, unknown function                   | 0.92  | 7.48    | 12.79  |
| PF3D7_0213600   | conserved Plasmodium protein, unknown function                   | 0.40  | 0.85    | 1.02   |
| PF3D7_0213700   | conserved protein, unknown function                              | -0.38 | 51.30   | 35.56  |
| PF3D7_0213800   | conserved Plasmodium protein, unknown function                   | -0.87 | 2.77    | 1.36   |
| PF3D7_0213900   | conserved Plasmodium protein, unknown function                   | 0.12  | 33.74   | 33.11  |
| PF3D7_0214000   | T-complex protein 1 subunit theta (CCT8)                         | -0.28 | 171.52  | 127.31 |
| PF3D7_0214100   | protein transport protein SEC31 (SEC31)                          | -0.57 | 280.04  | 170.37 |
| PF3D7_0214200   | mitochondrial ribosomal protein L13 precursor, putative          | 1.02  | 20.82   | 38.10  |
| PF3D7_0214300   | conserved Plasmodium protein, unknown function                   | 2.04  | 5.13    | 19.06  |
| PF3D7_0214400   | conserved Plasmodium protein, unknown function                   | -0.12 | 102.52  | 85.38  |
| PF3D7_0214500   | conserved Plasmodium protein, unknown function                   | -1.16 | 1.90    | 0.75   |
| PF3D7_0214600   | serine/threonine protein kinase, putative                        | 1.85  | 7.30    | 23.79  |
| PF3D7_0214700   | conserved Plasmodium protein, unknown function                   | 0.85  | 15.13   | 24.56  |
| PF3D7_0214800   | conserved Plasmodium membrane protein, unknown function          | -1.79 | 73.50   | 19.16  |
| PF3D7_0214900   | rhostry neck protein 6 (RON6)                                    | 0.88  | 73.61   | 121.81 |
| PF3D7_0215000   | acyl-CoA synthetase (ACS9)                                       | 1.30  | 9.50    | 21.12  |
| PF3D7_0215100   | RING zinc finger protein, putative                               | -0.33 | 53.04   | 38.00  |
| PF3D7_0215200   | conserved Plasmodium protein, unknown function                   | -0.21 | 10.24   | 7.99   |
| PF3D7_0215300   | acyl-CoA synthetase (ACS8)                                       | -0.30 | 78.14   | 57.36  |
| PF3D7_0215400   | conserved Plasmodium protein, unknown function                   | -0.15 | 85.19   | 69.48  |
| PF3D7_0215500   | conserved Plasmodium protein, unknown function                   | -0.47 | 34.83   | 22.67  |
| PF3D7_0215600   | conserved Plasmodium protein, unknown function                   | 0.00  | 39.86   | 36.07  |
| PF3D7_0215700   | DNA-directed RNA polymerase II subunit RPB2, putative (RPB2)     | 0.16  | 107.23  | 108.23 |
| PF3D7_0215800   | origin recognition complex subunit 5 (ORC5)                      | 0.31  | 5.45    | 6.09   |
| PF3D7_0215900   | palmitoyltransferase, putative (DHH11)                           | -0.27 | 3.66    | 2.74   |
| PF3D7_0216000   | DEAD/DEAH box helicase, putative                                 | 1.38  | 3.73    | 8.80   |
| PF3D7_0216100   | conserved Plasmodium protein, unknown function                   | -0.32 | 3.53    | 2.55   |
| PF3D7_0216200   | conserved Plasmodium protein, unknown function                   | -0.78 | 34.03   | 17.88  |
| PF3D7_0216300   | conserved Plasmodium protein, unknown function                   | -0.31 | 10.92   | 7.97   |
| PF3D7_0216400   | vacuolar protein sorting-associated protein 45, putative (VPS45) | -0.04 | 5.62    | 4.92   |
| PF3D7_0216500   | conserved Plasmodium protein, unknown function                   | 0.37  | 2.44    | 2.86   |
| PF3D7_0216600   | MtN3-like protein                                                | -0.61 | 116.59  | 69.10  |
| PF3D7_0216700.1 | autophagy-related protein 11, putative (ATG11)                   | 1.79  | 12.44   | 38.81  |
| PF3D7_0216700.2 | autophagy-related protein 11, putative (ATG11)                   | 1.78  | 12.47   | 38.76  |
| PF3D7_0216800   | conserved Plasmodium membrane protein, unknown function          | -0.05 | 7.97    | 6.95   |
| PF3D7_0216900   | conserved Plasmodium protein, unknown function                   | 0.62  | 8.02    | 11.10  |
| PF3D7_0217000   | conserved Plasmodium membrane protein, unknown function          | -0.14 | 1.28    | 1.05   |
| PF3D7_0217100   | ATP synthase F1, alpha subunit                                   | 1.11  | 33.41   | 65.13  |
| PF3D7_0217200   | conserved Plasmodium protein, unknown function                   | 0.06  | 2.63    | 2.47   |
| PF3D7_0217300   | AP-2 complex subunit sigma, putative                             | -0.57 | 22.98   | 13.95  |
| PF3D7_0217400   | conserved Plasmodium protein, unknown function                   | 0.00  | 22.15   | 19.94  |
| PF3D7_0217500   | calcium-dependent protein kinase 1 (CDPK1)                       | 0.68  | 92.34   | 133.91 |
| PF3D7_0217600   | conserved Plasmodium protein, unknown function                   | -0.09 | 17.08   | 14.49  |
| PF3D7_0217700   | E2F-associated phosphoprotein, putative                          | -0.51 | 63.86   | 40.31  |
| PF3D7_0217800   | 40S ribosomal protein S26 (RPS26)                                | -0.05 | 1047.25 | 909.62 |
| PF3D7_0217900   | conserved Plasmodium protein, unknown function                   | 0.47  | 25.75   | 32.27  |
| PF3D7_0218000   | replication factor C subunit 2, putative (RFC2)                  | 0.86  | 20.32   | 33.26  |
| PF3D7_0218100   | conserved Plasmodium membrane protein, unknown function          | -0.24 | 5.08    | 3.88   |
| PF3D7_0218200   | conserved Plasmodium protein, unknown function                   | -0.55 | 10.17   | 6.27   |
| PF3D7_0218300   | apicoplast RNA methyltransferase precursor, putative             | 0.09  | 12.26   | 11.79  |
| PF3D7_0218400   | DEAD/DEAH box ATP-dependent RNA helicase, putative               | -0.28 | 84.03   | 62.30  |
| PF3D7_0218500   | small nuclear ribonucleoprotein Sm D2, putative (SNRPD2)         | -1.36 | 43.48   | 15.20  |
| PF3D7_0218600   | conserved Plasmodium protein, unknown function                   | -0.49 | 21.11   | 13.59  |
| PF3D7_0218700   | pre-mRNA-processing protein 45, putative (PRP45)                 | -0.20 | 74.70   | 58.50  |
| PF3D7_0218800   | ribonuclease P                                                   | -1.06 | 31.24   | 13.46  |
| PF3D7_0218900   | Plasmodium RNA of unknown function RUF2                          | -1.03 | 0.84    | 0.29   |
| PF3D7_0219000   | small nucleolar RNA snoR01                                       | -3.51 | 3.28    | 0.00   |
| PF3D7_0219100   | conserved protein, unknown function                              | -0.37 | 5.88    | 4.10   |
| PF3D7_0219200   | 40S ribosomal protein S30                                        | -0.11 | 488.36  | 408.82 |
| PF3D7_0219300   | conserved Plasmodium protein, unknown function                   | 0.18  | 18.08   | 18.48  |
| PF3D7_0219400.1 | ribosome associated membrane protein RAMP4, putative             | 0.39  | 116.68  | 138.03 |
| PF3D7_0219400.2 | ribosome associated membrane protein RAMP4, putative             | 0.18  | 99.37   | 101.60 |
| PF3D7_0219500   | pseudouridine synthase, putative                                 | 1.00  | 6.56    | 11.82  |
| PF3D7_0219600   | replication factor C subunit 1, putative (RFC1)                  | 0.53  | 18.47   | 23.99  |
| PF3D7_0219700   | Plasmodium exported protein (PHISTc), unknown function (GEXP20)  | 0.10  | 169.06  | 163.65 |
| PF3D7_0219800   | Plasmodium exported protein (PHISTc), unknown function           | -0.45 | 71.61   | 47.43  |
| PF3D7_0219900   | Plasmodium exported protein, unknown function                    | -1.56 | 134.92  | 41.14  |
| PF3D7_0220000   | liver stage antigen 3 (LSA3)                                     | -0.09 | 1060.59 | 901.28 |
| PF3D7_0220100   | DnaJ protein, putative                                           | -0.37 | 145.21  | 101.70 |
| PF3D7_0220200   | Plasmodium exported protein, unknown function                    | 0.11  | 367.14  | 357.20 |
| PF3D7_0220300   | Plasmodium exported protein, unknown function                    | 0.92  | 7.01    | 11.97  |
| PF3D7_0220400   | DnaJ protein, putative, pseudogene                               | -0.25 | 3.38    | 2.56   |
| PF3D7_0220500   | Plasmodium exported protein (hyp2), unknown function             | 1.47  | 64.87   | 161.61 |
| PF3D7_0220600   | Plasmodium exported protein (hyp9), unknown function             | 0.28  | 44.01   | 48.10  |
| PF3D7_0220700   | Plasmodium exported protein (hyp9), unknown function             | -1.09 | 243.24  | 102.89 |
| PF3D7_0220800   | cytoadherence linked asexual protein 2 (CLAG2)                   | -0.11 | 46.22   | 38.72  |
| PF3D7_0220900   | Plasmodium exported protein, unknown function, pseudogene        | 0.19  | 0.00    | 0.00   |
| PF3D7_0221000   | Plasmodium exported protein, unknown function                    | -1.58 | 0.39    | 0.10   |
| PF3D7_0221100   | Plasmodium exported protein, unknown function, pseudogene        | 0.51  | 0.09    | 0.12   |
| PF3D7_0221200   | Plasmodium exported protein (hyp15), unknown function            | -0.29 | 16.70   | 12.28  |
| PF3D7_0221300   | Plasmodium exported protein, unknown function, pseudogene        | 0.19  | 0.00    | 0.00   |
| PF3D7_0221400   | stevor                                                           | 3.65  | 0.00    | 0.25   |
| PF3D7_0221500   | Pfmc-2TM Maurer's cleft two transmembrane protein, pseudogene    | 1.25  | 0.36    | 0.82   |
| PF3D7_0221600   | Plasmodium exported protein, unknown function, pseudogene        | -0.23 | 0.11    | 0.07   |
| PF3D7_0221700   | Plasmodium exported protein, unknown function                    | -0.32 | 58.43   | 42.28  |
| PF3D7_0221800   | hypothetical protein                                             | -0.29 | 10.31   | 7.55   |
| PF3D7_0221900   | erythrocyte membrane protein 1 (PEMP1), pseudogene               | 0.94  | 3.58    | 6.23   |
| PF3D7_0222000   | exported protein family 1 (EPF1)                                 | -2.23 | 13.77   | 2.63   |
| PF3D7_0222100   | Pfmc-2TM Maurer's cleft two transmembrane protein (MC-2TM)       | 3.35  | 0.71    | 6.84   |
| PF3D7_0222200   | exported protein family 3 (EPF3)                                 | -7.17 | 95.42   | 0.56   |
| PF3D7_0222300   | exported protein family 4, pseudogene (EPF4)                     | -1.46 | 129.43  | 42.45  |
| PF3D7_0222400   | rifin, pseudogene (RIF)                                          | -1.49 | 0.31    | 0.09   |
| PF3D7_0222500   | rifin (RIF)                                                      | 0.77  | 0.02    | 0.05   |
| PF3D7_0222600   | rifin (RIF)                                                      | 2.51  | 0.04    | 0.29   |

|               |                                                                                                       |       |         |         |
|---------------|-------------------------------------------------------------------------------------------------------|-------|---------|---------|
| PF3D7_0222700 | rifin (RIF)                                                                                           | 0.19  | 0.09    | 0.09    |
| PF3D7_0222800 | stevor                                                                                                | 1.77  | 0.05    | 0.20    |
| PF3D7_0222900 | erythrocyte membrane protein 1 (PfEMP1), exon 2, pseudogene (VAR)                                     | 2.51  | 0.03    | 0.24    |
| PF3D7_0223100 | rifin (RIF)                                                                                           | 2.38  | 0.18    | 0.93    |
| PF3D7_0223200 | rifin (RIF)                                                                                           | 0.19  | 0.04    | 0.04    |
| PF3D7_0223300 | erythrocyte membrane protein 1 (PfEMP1), exon 2                                                       | -0.07 | 1.02    | 0.87    |
| PF3D7_0223400 | rifin (RIF)                                                                                           | -0.37 | 4.76    | 3.32    |
| PF3D7_0223500 | erythrocyte membrane protein 1, PfEMP1 (VAR)                                                          | -0.22 | 3.22    | 2.50    |
| PF3D7_0300100 | erythrocyte membrane protein 1, PfEMP1 (VAR)                                                          | 0.83  | 5.31    | 8.52    |
| PF3D7_0300200 | rifin (RIF)                                                                                           | 1.13  | 1.85    | 3.66    |
| PF3D7_0300300 | erythrocyte membrane protein 1 (PfEMP1), exon 2, pseudogene (VAR)                                     | -1.24 | 0.55    | 0.20    |
| PF3D7_0300400 | stevor                                                                                                | 1.77  | 0.05    | 0.21    |
| PF3D7_0300500 | rifin (RIF)                                                                                           | 0.19  | 0.10    | 0.11    |
| PF3D7_0300600 | Plasmodium exported protein, unknown function, fragment                                               | 1.19  | 0.00    | 0.11    |
| PF3D7_0300700 | rifin (RIF)                                                                                           | 3.65  | 0.00    | 0.21    |
| PF3D7_0300800 | rifin (RIF)                                                                                           | 3.19  | 0.05    | 0.55    |
| PF3D7_0300900 | stevor-like                                                                                           | 4.59  | 0.55    | 12.70   |
| PF3D7_0301000 | acyl-CoA synthetase (ACS2)                                                                            | -1.33 | 4.42    | 1.58    |
| PF3D7_0301100 | Plasmodium exported protein (hyp13), unknown function                                                 | -2.06 | 2.32    | 0.48    |
| PF3D7_0301200 | serine/threonine protein kinase, FIKK family (FIKK3)                                                  | -0.40 | 73.19   | 50.06   |
| PF3D7_0301300 | alpha/beta hydrolase, putative                                                                        | -0.88 | 55.28   | 27.15   |
| PF3D7_0301400 | Plasmodium exported protein, unknown function                                                         | -0.31 | 12.76   | 9.25    |
| PF3D7_0301500 | Plasmodium exported protein, unknown function                                                         | -1.73 | 72.91   | 19.74   |
| PF3D7_0301600 | Plasmodium exported protein (hyp1), unknown function (GEXP21)                                         | -0.74 | 255.74  | 138.40  |
| PF3D7_0301700 | Plasmodium exported protein, unknown function                                                         | 0.59  | 49.05   | 66.82   |
| PF3D7_0301800 | Plasmodium exported protein, unknown function                                                         | 0.22  | 348.29  | 366.13  |
| PF3D7_0301900 | conserved Plasmodium protein, unknown function                                                        | -0.68 | 1.89    | 1.06    |
| PF3D7_0302000 | pre-mRNA-splicing factor PRP46, putative (PRP46)                                                      | 0.05  | 74.84   | 69.97   |
| PF3D7_0302100 | serine/threonine protein kinase (SRPK1)                                                               | -0.35 | 98.92   | 69.82   |
| PF3D7_0302200 | cytoadherence linked asexual protein 3.2 (CLAG3.2)                                                    | -0.52 | 214.74  | 134.80  |
| PF3D7_0302300 | erythrocyte membrane protein 1 (PfEMP1), pseudogene                                                   | -1.83 | 81.93   | 20.73   |
| PF3D7_0302400 | unspecified product                                                                                   | -3.37 | 1.11    | 0.08    |
| PF3D7_0302500 | cytoadherence linked asexual protein 3.1 (CLAG3.1)                                                    | -0.65 | 508.66  | 292.71  |
| PF3D7_0302600 | ABC transporter B family member 4, putative (ABCB4)                                                   | 0.16  | 4.51    | 4.55    |
| PF3D7_0302700 | CDGSH iron-sulfur domain-containing protein, putative                                                 | 0.65  | 7.81    | 11.04   |
| PF3D7_0302800 | conserved Plasmodium protein, unknown function                                                        | -1.17 | 68.82   | 27.58   |
| PF3D7_0302900 | exportin-1, putative                                                                                  | -0.24 | 112.90  | 86.10   |
| PF3D7_0303000 | N-ethylmaleimide-sensitive fusion protein (NSF)                                                       | -1.34 | 26.48   | 9.40    |
| PF3D7_0303100 | conserved Plasmodium protein, unknown function                                                        | -0.58 | 9.11    | 5.50    |
| PF3D7_0303200 | HAD superfamily protein, putative                                                                     | 1.27  | 51.26   | 111.67  |
| PF3D7_0303300 | DNA-directed RNA polymerase subunit 1, putative                                                       | -0.58 | 177.60  | 107.17  |
| PF3D7_0303400 | palmitoyltransferase (DHHC1)                                                                          | -0.22 | 15.41   | 11.93   |
| PF3D7_0303500 | spindle pole body protein, putative                                                                   | 0.37  | 4.75    | 5.55    |
| PF3D7_0303600 | plasmoredoxin (Plrx)                                                                                  | -1.11 | 8.96    | 3.71    |
| PF3D7_0303700 | lipamide acyltransferase component of branched-chain alpha-keto acid dehydrogenase complex (BCKDH-E2) | 0.96  | 22.03   | 38.62   |
| PF3D7_0303800 | IBR domain protein, putative                                                                          | 0.85  | 5.33    | 8.66    |
| PF3D7_0303900 | phosphatidylethanolamine-binding protein, putative                                                    | 1.83  | 3.21    | 10.39   |
| PF3D7_0304000 | inner membrane complex protein 1a, putative (IMC1a)                                                   | 3.17  | 0.97    | 7.96    |
| PF3D7_0304100 | inner membrane complex protein 1c, putative (IMC1c)                                                   | 1.27  | 24.86   | 54.03   |
| PF3D7_0304200 | EH (Eps15 homology) protein (PAST1)                                                                   | -0.68 | 64.03   | 36.03   |
| PF3D7_0304300 | conserved Plasmodium protein, unknown function                                                        | -0.63 | 2.52    | 1.47    |
| PF3D7_0304400 | 60S ribosomal protein L44 (RPL44)                                                                     | 0.28  | 566.82  | 622.84  |
| PF3D7_0304500 | l-cys-glutaredoxin-like protein-1 (GLP1)                                                              | 1.73  | 4.91    | 14.82   |
| PF3D7_0304600 | circumsporozoite (CS) protein (CSP)                                                                   | 1.75  | 4.69    | 14.27   |
| PF3D7_0304700 | conserved Plasmodium protein, unknown function                                                        | 2.35  | 0.35    | 1.66    |
| PF3D7_0304800 | conserved Plasmodium membrane protein, unknown function                                               | -0.16 | 0.98    | 0.79    |
| PF3D7_0304900 | conserved Plasmodium protein, unknown function                                                        | -0.37 | 59.78   | 41.84   |
| PF3D7_0305000 | elongation factor Ts (EF-Ts)                                                                          | 0.00  | 30.63   | 27.68   |
| PF3D7_0305100 | conserved Plasmodium protein, unknown function                                                        | 1.12  | 4.10    | 8.05    |
| PF3D7_0305200 | conserved Plasmodium protein, unknown function                                                        | -0.70 | 66.34   | 36.79   |
| PF3D7_0305300 | conserved Plasmodium membrane protein, unknown function                                               | -1.04 | 156.55  | 68.69   |
| PF3D7_0305400 | conserved Plasmodium protein, unknown function                                                        | 0.67  | 11.35   | 16.35   |
| PF3D7_0305500 | conserved Plasmodium protein, unknown function                                                        | -0.83 | 64.86   | 32.98   |
| PF3D7_0305600 | AP endonuclease (DNA-[apurinic or apyrimidinic site] lyase), putative                                 | 0.24  | 42.44   | 45.34   |
| PF3D7_0305700 | ubiquitin-conjugating enzyme E2, putative                                                             | 0.42  | 193.35  | 233.58  |
| PF3D7_0305800 | P-loop containing nucleoside triphosphate hydrolase, putative                                         | 1.17  | 1.45    | 2.95    |
| PF3D7_0305900 | conserved Plasmodium protein, unknown function                                                        | -0.61 | 4.32    | 2.54    |
| PF3D7_0306000 | conserved Plasmodium protein, unknown function                                                        | 0.63  | 29.43   | 41.16   |
| PF3D7_0306100 | conserved Plasmodium protein, unknown function                                                        | -1.15 | 51.20   | 20.86   |
| PF3D7_0306200 | activator of Hsp90 ATPase (AHA1)                                                                      | -0.89 | 33.30   | 16.25   |
| PF3D7_0306300 | glutaredoxin 1 (GRX1)                                                                                 | 0.81  | 86.67   | 137.50  |
| PF3D7_0306400 | FAD-dependent glycerol-3-phosphate dehydrogenase, putative                                            | 0.43  | 34.03   | 41.38   |
| PF3D7_0306500 | conserved Plasmodium protein, unknown function                                                        | 0.05  | 28.62   | 26.82   |
| PF3D7_0306600 | conserved Plasmodium protein, unknown function                                                        | -0.27 | 30.99   | 23.21   |
| PF3D7_0306700 | membrane magnesium transporter, putative                                                              | 0.44  | 31.27   | 38.19   |
| PF3D7_0306800 | T-complex protein 1 subunit beta (CCT2)                                                               | -0.39 | 248.06  | 170.54  |
| PF3D7_0306900 | 40S ribosomal protein S23, putative                                                                   | 0.14  | 1316.36 | 1305.35 |
| PF3D7_0307000 | small nucleolar RNA snoR03                                                                            | -2.31 | 2.24    | 0.29    |
| PF3D7_0307100 | 40S ribosomal protein S12, putative                                                                   | 0.26  | 778.57  | 843.35  |
| PF3D7_0307200 | 60S ribosomal protein L7, putative                                                                    | -0.29 | 1796.52 | 1328.39 |
| PF3D7_0307300 | EB1 homolog, putative                                                                                 | 0.73  | 1.34    | 2.01    |
| PF3D7_0307400 | ATP-dependent Clp protease proteolytic subunit (ClpP)                                                 | 0.71  | 14.45   | 21.40   |
| PF3D7_0307500 | conserved protein, unknown function                                                                   | 0.18  | 7.06    | 7.24    |
| PF3D7_0307600 | conserved Plasmodium protein, unknown function                                                        | 0.72  | 7.36    | 10.97   |
| PF3D7_0307700 | conserved Plasmodium protein, unknown function                                                        | 0.87  | 33.94   | 55.88   |
| PF3D7_0307800 | conserved Plasmodium protein, unknown function                                                        | -0.38 | 62.55   | 43.36   |
| PF3D7_0307900 | conserved Plasmodium protein, unknown function                                                        | 1.97  | 0.47    | 1.66    |
| PF3D7_0308000 | DNA polymerase epsilon subunit b, putative                                                            | 1.20  | 4.07    | 8.43    |
| PF3D7_0308100 | conserved Plasmodium protein, unknown function                                                        | -0.29 | 18.78   | 13.82   |
| PF3D7_0308200 | T-complex protein 1 subunit eta (CCT7)                                                                | -0.16 | 221.48  | 178.34  |
| PF3D7_0308300 | conserved Plasmodium protein, unknown function                                                        | 0.09  | 10.96   | 10.49   |
| PF3D7_0308400 | U4 spliceosomal RNA                                                                                   | 2.95  | 2.64    | 19.55   |
| PF3D7_0308500 | activator of Hsp90 ATPase, putative                                                                   | 1.88  | 22.61   | 75.41   |
| PF3D7_0308600 | pre-mRNA-processing factor 19, putative (PRPF19)                                                      | -0.24 | 131.81  | 100.34  |
| PF3D7_0308700 | conserved Plasmodium protein, unknown function                                                        | 1.08  | 15.40   | 29.31   |
| PF3D7_0308800 | conserved protein, unknown function                                                                   | 1.20  | 16.65   | 34.65   |
| PF3D7_0308900 | splicing factor 3B subunit 1, putative (SF3B1)                                                        | -0.20 | 65.84   | 51.84   |
| PF3D7_0309000 | dual specificity protein phosphatase (YVH1)                                                           | -0.81 | 41.26   | 21.22   |

|                 |                                                                                    |       |         |         |
|-----------------|------------------------------------------------------------------------------------|-------|---------|---------|
| PF3D7_0309100   | conserved Plasmodium protein, unknown function                                     | -0.36 | 2.21    | 1.54    |
| PF3D7_0309200   | serine/threonine protein kinase, putative (ARK2)                                   | 0.24  | 23.65   | 25.27   |
| PF3D7_0309300   | N2227-like protein, putative                                                       | -0.51 | 57.51   | 36.46   |
| PF3D7_0309400   | small nucleolar RNA Me18S-Um1356                                                   | -0.81 | 0.94    | 0.39    |
| PF3D7_0309500   | asparagine synthetase, putative                                                    | 0.00  | 405.14  | 365.01  |
| PF3D7_0309600   | 60S acidic ribosomal protein P2 (PfP2)                                             | 0.67  | 880.99  | 1264.95 |
| PF3D7_0309700   | SECIS-binding protein 2, putative (SBP2)                                           | -0.04 | 17.18   | 15.10   |
| PF3D7_0309800   | YTH domain-containing protein, putative                                            | -0.60 | 105.91  | 63.19   |
| PF3D7_0309900   | conserved Plasmodium protein, unknown function                                     | 0.18  | 2.15    | 2.19    |
| PF3D7_0310000   | 50S ribosomal protein L9, apicoplast, putative                                     | 0.48  | 10.26   | 12.95   |
| PF3D7_0310100   | calcium-dependent protein kinase 3 (CDPK3)                                         | 0.67  | 1.70    | 2.44    |
| PF3D7_0310200   | phd finger protein, putative                                                       | -0.68 | 146.76  | 82.78   |
| PF3D7_0310300   | phosphoglycerate mutase, putative                                                  | -0.47 | 74.99   | 48.81   |
| PF3D7_0310400   | parasite-infected erythrocyte surface protein (PIESP1)                             | -0.35 | 61.46   | 43.43   |
| PF3D7_0310500   | DEAD box helicase, putative                                                        | -0.48 | 37.12   | 23.98   |
| PF3D7_0310600.1 | eukaryotic translation initiation factor 3 subunit K, putative (EIF3K)             | -1.64 | 88.62   | 25.66   |
| PF3D7_0310600.2 | unspecified product (EIF3K)                                                        | -1.64 | 88.87   | 25.71   |
| PF3D7_0310700   | trafficking protein particle complex subunit 4, putative                           | -1.03 | 155.16  | 68.30   |
| PF3D7_0310800   | conserved Plasmodium protein, unknown function                                     | -0.86 | 178.38  | 88.84   |
| PF3D7_0310900   | conserved Plasmodium protein, unknown function                                     | -0.41 | 14.67   | 9.93    |
| PF3D7_0311000   | conserved Plasmodium protein, unknown function                                     | 0.34  | 0.29    | 0.34    |
| PF3D7_0311100   | pre-mRNA splicing factor, putative                                                 | 0.38  | 65.00   | 76.15   |
| PF3D7_0311200   | valine--tRNA ligase, putative                                                      | -0.25 | 8.13    | 6.14    |
| PF3D7_0311300   | phosphatidylinositol 3- and 4-kinase, putative                                     | 0.59  | 34.74   | 47.03   |
| PF3D7_0311400   | protein kinase, putative                                                           | 2.11  | 1.28    | 4.97    |
| PF3D7_0311500   | conserved Plasmodium protein, unknown function                                     | -1.14 | 125.66  | 51.40   |
| PF3D7_0311600   | dolichyl-diphosphooligosaccharide--protein glycosyltransferase subunit I, putative | 0.02  | 8.11    | 7.43    |
| PF3D7_0311700   | plasmepsin VI                                                                      | 1.80  | 1.29    | 4.10    |
| PF3D7_0311800   | conserved protein, unknown function                                                | 0.66  | 18.27   | 26.08   |
| PF3D7_0311900   | conserved Plasmodium protein, unknown function                                     | 0.18  | 3.06    | 3.12    |
| PF3D7_0312000   | conserved Plasmodium protein, unknown function                                     | 1.53  | 3.05    | 8.01    |
| PF3D7_0312100   | E3 ubiquitin-protein ligase, putative                                              | -0.28 | 9.74    | 7.25    |
| PF3D7_0312200   | TPR domain containing protein                                                      | 0.62  | 3.56    | 4.92    |
| PF3D7_0312300   | 26S proteasome regulatory subunit RPN12, putative (RPN12)                          | -0.56 | 45.14   | 27.61   |
| PF3D7_0312400   | glycogen synthase kinase 3 (GSK3)                                                  | 1.39  | 55.55   | 131.01  |
| PF3D7_0312500   | transporter, putative                                                              | -0.47 | 19.16   | 12.45   |
| PF3D7_0312600   | tRNA Valine                                                                        | 2.47  | 1.75    | 9.87    |
| PF3D7_0312700   | tRNA Isoleucine                                                                    | 0.19  | 0.00    | 0.00    |
| PF3D7_0312800   | 60S ribosomal protein L26, putative                                                | -0.83 | 1198.23 | 609.96  |
| PF3D7_0312900   | hypothetical protein                                                               | -0.83 | 13.60   | 6.86    |
| PF3D7_0313000   | conserved Plasmodium protein, unknown function                                     | -1.41 | 50.97   | 17.32   |
| PF3D7_0313100   | ubiquitin-protein ligase, putative (HRD3)                                          | 0.34  | 25.93   | 29.69   |
| PF3D7_0313200   | conserved Plasmodium protein, unknown function                                     | -0.35 | 15.06   | 10.63   |
| PF3D7_0313300   | apicoplast conserved ycf19 protein precursor, unknown function                     | 0.05  | 6.95    | 6.49    |
| PF3D7_0313400   | conserved Plasmodium protein, unknown function                                     | -0.53 | 17.17   | 10.76   |
| PF3D7_0313500   | GTP-binding protein EngA, putative                                                 | -0.87 | 17.67   | 8.73    |
| PF3D7_0313600   | conserved Plasmodium protein, unknown function                                     | 1.36  | 7.30    | 16.97   |
| PF3D7_0313700.1 | conserved Plasmodium protein, unknown function                                     | 0.68  | 7.62    | 11.00   |
| PF3D7_0313700.2 | conserved Plasmodium protein, unknown function                                     | 0.59  | 7.47    | 10.16   |
| PF3D7_0313800   | conserved Plasmodium protein, unknown function                                     | 0.25  | 8.13    | 8.71    |
| PF3D7_0313900   | conserved Plasmodium protein, unknown function                                     | 0.31  | 0.71    | 0.80    |
| PF3D7_0314000   | co-chaperone p23 (P23)                                                             | 0.51  | 18.72   | 24.06   |
| PF3D7_0314100.1 | vesicle transport v-SNARE protein, putative                                        | -0.11 | 44.31   | 37.03   |
| PF3D7_0314100.2 | vesicle transport v-SNARE protein, putative                                        | 0.03  | 2.94    | 2.70    |
| PF3D7_0314200   | conserved Plasmodium protein, unknown function                                     | -0.18 | 3.32    | 2.65    |
| PF3D7_0314300   | DER1-like protein (Der1-2)                                                         | -0.66 | 2.92    | 1.66    |
| PF3D7_0314400   | serine/threonine protein phosphatase 6, putative (PPP6)                            | -1.08 | 79.30   | 33.76   |
| PF3D7_0314500   | conserved Plasmodium protein, unknown function                                     | -2.20 | 126.33  | 24.84   |
| PF3D7_0314600   | conserved Plasmodium protein, unknown function                                     | -0.77 | 48.81   | 25.88   |
| PF3D7_0314700   | zinc finger protein, putative                                                      | 2.19  | 6.74    | 27.70   |
| PF3D7_0314800   | conserved Plasmodium protein, unknown function                                     | -1.11 | 2.85    | 1.19    |
| PF3D7_0314900   | conserved Plasmodium membrane protein, unknown function                            | -0.33 | 8.91    | 6.40    |
| PF3D7_0315000   | zinc finger protein, putative                                                      | 0.83  | 4.76    | 7.64    |
| PF3D7_0315100   | eukaryotic translation initiation factor 4E (eIF4E)                                | -1.14 | 227.83  | 93.37   |
| PF3D7_0315200   | circumsporozoite- and TRAP-related protein (CTRP)                                  | 1.38  | 3.95    | 9.30    |
| PF3D7_0315300   | conserved Plasmodium protein, unknown function                                     | 0.67  | 1.19    | 1.71    |
| PF3D7_0315400   | conserved Plasmodium protein, unknown function                                     | -0.29 | 14.18   | 10.42   |
| PF3D7_0315500   | mitochondrial ribosomal protein L29/L47 precursor, putative                        | 0.21  | 15.80   | 16.44   |
| PF3D7_0315600   | conserved Plasmodium protein, unknown function                                     | 2.21  | 5.05    | 21.18   |
| PF3D7_0315700   | conserved Plasmodium membrane protein, unknown function                            | -0.60 | 1.92    | 1.14    |
| PF3D7_0315800   | zinc finger protein, putative                                                      | -0.74 | 63.04   | 33.96   |
| PF3D7_0315900   | conserved Plasmodium protein, unknown function                                     | -0.14 | 3.63    | 2.95    |
| PF3D7_0316000   | miconeme associated antigen (MA)                                                   | 1.15  | 5.04    | 10.14   |
| PF3D7_0316100   | mitochondrial ribosomal protein L27 precursor, putative                            | 0.84  | 11.44   | 18.46   |
| PF3D7_0316200   | conserved Plasmodium protein, unknown function                                     | 0.38  | 4.76    | 5.59    |
| PF3D7_0316300.1 | inorganic pyrophosphatase, putative                                                | 0.55  | 70.39   | 93.27   |
| PF3D7_0316300.2 | inorganic pyrophosphatase, putative                                                | 0.49  | 66.25   | 84.03   |
| PF3D7_0316400   | conserved Plasmodium protein, unknown function                                     | 0.76  | 11.60   | 17.78   |
| PF3D7_0316500   | kinetochore protein NUF2, putative (NUF2)                                          | -0.07 | 19.02   | 16.37   |
| PF3D7_0316600   | formate-nitrite transporter (FNT)                                                  | -0.42 | 520.64  | 351.10  |
| PF3D7_0316700   | HVA22/TB2/DP1 family protein, putative                                             | -0.85 | 57.41   | 28.70   |
| PF3D7_0316800   | 40S ribosomal protein S15A, putative                                               | 0.12  | 1006.67 | 985.60  |
| PF3D7_0316900   | E3 ubiquitin-protein ligase, putative                                              | -0.84 | 67.85   | 34.27   |
| PF3D7_0317000   | proteasome subunit alpha type-3, putative                                          | -0.68 | 159.48  | 89.54   |
| PF3D7_0317100   | 6-cysteine protein (B9)                                                            | 0.29  | 2.43    | 2.68    |
| PF3D7_0317200   | cdc2-related protein kinase 4 (CRK4)                                               | 0.45  | 74.31   | 91.53   |
| PF3D7_0317300   | conserved Plasmodium protein, unknown function                                     | -0.33 | 77.82   | 55.90   |
| PF3D7_0317400   | conserved Plasmodium protein, unknown function                                     | -1.08 | 10.90   | 4.66    |
| PF3D7_0317500   | kinesin-5 (EG5)                                                                    | -0.82 | 63.16   | 32.29   |
| PF3D7_0317600   | 40S ribosomal protein S11, putative (RPS11)                                        | -0.21 | 1222.53 | 952.62  |
| PF3D7_0317700   | CPSF (cleavage and polyadenylation specific factor), subunit A, putative           | -0.58 | 43.34   | 26.22   |
| PF3D7_0317800   | proteasome regulatory protein, putative                                            | -0.58 | 63.00   | 38.08   |
| PF3D7_0317900   | conserved Plasmodium protein, unknown function                                     | 0.14  | 5.54    | 5.51    |
| PF3D7_0318000   | conserved Plasmodium protein, unknown function                                     | -1.47 | 1.36    | 0.42    |
| PF3D7_0318100   | stomatin-like protein                                                              | 0.88  | 11.29   | 18.73   |
| PF3D7_0318200   | DNA-directed RNA polymerase II subunit RPB1 (RPB1)                                 | -0.64 | 264.47  | 153.56  |
| PF3D7_0318300   | conserved Plasmodium protein, unknown function                                     | -1.13 | 103.25  | 42.58   |
| PF3D7_0318400   | conserved Plasmodium protein, unknown function                                     | 1.36  | 0.85    | 1.97    |

|                 |                                                                                                    |       |         |         |
|-----------------|----------------------------------------------------------------------------------------------------|-------|---------|---------|
| PF3D7_0318500   | conserved Plasmodium protein, unknown function                                                     | 0.14  | 8.46    | 8.41    |
| PF3D7_0318600   | cleavage and polyadenylation specificity factor, putative                                          | -0.20 | 51.50   | 40.46   |
| PF3D7_0318700   | trophozoite stage antigen                                                                          | 2.22  | 4.42    | 18.81   |
| PF3D7_0318800   | triosephosphate isomerase, putative                                                                | 0.47  | 1.44    | 1.80    |
| PF3D7_0318900   | conserved protein, unknown function                                                                | -0.24 | 57.24   | 43.61   |
| PF3D7_0319000   | P-type ATPase, putative (ATPase7)                                                                  | -0.11 | 25.77   | 21.54   |
| PF3D7_0319100   | E3 ubiquitin-protein ligase RBX1, putative (RBX1)                                                  | 0.89  | 54.13   | 90.84   |
| PF3D7_0319200   | endonuclease/exonuclease/phosphatase family protein, putative                                      | -0.48 | 28.30   | 18.32   |
| PF3D7_0319300   | ubiquitin-conjugating enzyme, putative                                                             | -0.38 | 50.78   | 35.24   |
| PF3D7_0319400   | kinesin-8, putative                                                                                | 0.89  | 9.17    | 15.31   |
| PF3D7_0319500   | RNA-binding protein, putative                                                                      | 0.32  | 146.32  | 164.73  |
| PF3D7_0319600   | elongation factor 1 (EF-1), putative                                                               | 0.02  | 225.61  | 206.49  |
| PF3D7_0319700   | ABC transporter I family member 1, putative (ABCI3)                                                | -0.90 | 56.48   | 27.24   |
| PF3D7_0319800   | conserved Plasmodium protein, unknown function                                                     | -1.09 | 2.97    | 1.25    |
| PF3D7_0319900   | conserved Plasmodium protein, unknown function                                                     | -1.52 | 59.31   | 18.59   |
| PF3D7_0320000   | protein phosphatase inhibitor 2 (I2)                                                               | 1.18  | 32.44   | 66.18   |
| PF3D7_0320100   | protein transport protein SEC22 (SEC22)                                                            | -0.12 | 32.52   | 27.04   |
| PF3D7_0320200   | CPW-WPC family protein                                                                             | 1.40  | 1.21    | 2.91    |
| PF3D7_0320300   | T-complex protein 1 subunit epsilon (CCT5)                                                         | 0.18  | 199.97  | 204.02  |
| PF3D7_0320400   | oocyst capsule protein (Cap380)                                                                    | 2.79  | 0.34    | 2.11    |
| PF3D7_0320500   | nicotinamidase, putative (Nico)                                                                    | 0.36  | 32.42   | 37.44   |
| PF3D7_0320600   | conserved Plasmodium protein, unknown function                                                     | 0.17  | 5.05    | 5.14    |
| PF3D7_0320700   | signal peptidase complex subunit 2, putative (SPC2)                                                | 0.67  | 37.79   | 54.08   |
| PF3D7_0320800   | ATP-dependent RNA helicase DDX6 (DOZI)                                                             | 0.70  | 20.85   | 30.60   |
| PF3D7_0320900   | histone H2A variant, putative (H2A.Z)                                                              | -0.18 | 1271.24 | 1011.78 |
| PF3D7_0321000   | conserved Plasmodium protein, unknown function                                                     | -0.70 | 56.05   | 31.06   |
| PF3D7_0321100   | conserved Plasmodium protein, unknown function                                                     | -0.26 | 4.87    | 3.66    |
| PF3D7_0321200   | UDP-N-acetylglucosamine--dolichyl-phosphate N-acetylglucosaminophosphotransferase, putative (ALG7) | 0.00  | 5.50    | 4.96    |
| PF3D7_0321300   | conserved Plasmodium protein, unknown function                                                     | -0.02 | 2.08    | 1.86    |
| PF3D7_0321400   | protein kinase, putative                                                                           | 0.14  | 34.32   | 34.09   |
| PF3D7_0321500   | peptidase, putative                                                                                | 0.23  | 14.47   | 15.31   |
| PF3D7_0321600   | ATP-dependent RNA helicase, putative                                                               | -0.13 | 24.43   | 20.11   |
| PF3D7_0321700   | microtubule and actin binding protein, putative                                                    | 0.33  | 5.52    | 6.25    |
| PF3D7_0321800   | WD repeat-containing protein, putative                                                             | -0.47 | 64.48   | 41.86   |
| PF3D7_0321900   | cyclic amine resistance locus protein (CARL)                                                       | -0.20 | 65.43   | 51.55   |
| PF3D7_0322000   | peptidyl-prolyl cis-trans isomerase (CYP19A)                                                       | 0.37  | 1038.81 | 1209.21 |
| PF3D7_0322100   | RNA triphosphatase (Prt1)                                                                          | -0.53 | 93.24   | 58.30   |
| PF3D7_0322200   | conserved Plasmodium protein, unknown function                                                     | 1.25  | 0.99    | 2.14    |
| PF3D7_0322300   | diacylglycerol O-acyltransferase (DGAT)                                                            | -0.29 | 22.88   | 16.88   |
| PF3D7_0322400   | regulator of initiation factor 2 (eIF2)                                                            | -1.70 | 54.21   | 15.10   |
| PF3D7_0322500   | iron-sulfur assembly protein, putative (IscA2)                                                     | 0.06  | 7.87    | 7.41    |
| PF3D7_0322600   | conserved Plasmodium protein, unknown function                                                     | 0.02  | 0.64    | 0.59    |
| PF3D7_0322700   | conserved Plasmodium protein, unknown function                                                     | -0.42 | 25.86   | 17.47   |
| PF3D7_0322800   | conserved Plasmodium protein, unknown function                                                     | -0.03 | 1.44    | 1.27    |
| PF3D7_0322900   | 40S ribosomal protein S3A, putative                                                                | -0.15 | 975.11  | 792.92  |
| PF3D7_0323000   | translation machinery-associated protein 7, putative (TMA7)                                        | -1.37 | 25.79   | 8.93    |
| PF3D7_0323100   | conserved Plasmodium protein, unknown function                                                     | -0.67 | 25.92   | 14.69   |
| PF3D7_0323200   | conserved Plasmodium protein, unknown function                                                     | -0.79 | 4.75    | 2.47    |
| PF3D7_0323300   | conserved protein, unknown function                                                                | 1.09  | 1.29    | 2.49    |
| PF3D7_0323400   | Rh5 interacting protein (RIPR)                                                                     | 1.46  | 15.42   | 38.33   |
| PF3D7_0323500   | survival motor neuron-like protein (SMN)                                                           | 0.02  | 61.72   | 56.51   |
| PF3D7_0323600   | conserved Plasmodium protein, unknown function                                                     | -0.76 | 14.00   | 7.45    |
| PF3D7_0323700   | U4/U6.U5 tri-snRNP-associated protein 1, putative (SART1)                                          | 0.82  | 48.94   | 77.86   |
| PF3D7_0323800   | conserved Plasmodium protein, unknown function                                                     | -1.47 | 62.66   | 20.35   |
| PF3D7_0323900   | erythrocyte membrane protein 1 (PfEMP1), exon 2, pseudogene (VAR)                                  | -0.46 | 3.31    | 2.17    |
| PF3D7_0324000   | exported protein family 1 (EPF1)                                                                   | -2.23 | 14.38   | 2.74    |
| PF3D7_0324100   | Pfmc-2TM Maurer's cleft two transmembrane protein (MC-2TM)                                         | 2.39  | 1.83    | 8.80    |
| PF3D7_0324200   | exported protein family 3 (EPF3)                                                                   | -0.51 | 93.06   | 58.75   |
| PF3D7_0324300   | exported protein family 4 (EPF4)                                                                   | -0.11 | 135.84  | 113.59  |
| PF3D7_0324400   | rifin (RIF)                                                                                        | -0.09 | 1.45    | 1.23    |
| PF3D7_0324500   | rifin (RIF)                                                                                        | 0.87  | 0.09    | 0.17    |
| PF3D7_0324600   | stevor                                                                                             | 2.24  | 0.15    | 0.71    |
| PF3D7_0324700   | erythrocyte membrane protein 1 (PfEMP1), exon 2, pseudogene (VAR)                                  | -0.83 | 1.33    | 0.67    |
| PF3D7_0324800   | rifin (RIF)                                                                                        | 1.19  | 1.85    | 3.82    |
| PF3D7_0324900   | erythrocyte membrane protein 1, PfEMP1 (VAR)                                                       | 0.74  | 5.57    | 8.39    |
| PF3D7_0400100   | erythrocyte membrane protein 1, PfEMP1 (VAR)                                                       | 0.72  | 6.25    | 9.31    |
| PF3D7_0400200   | erythrocyte membrane protein 1 (PfEMP1), exon 2, pseudogene                                        | 0.89  | 102.57  | 171.48  |
| PF3D7_0400300   | rifin (RIF)                                                                                        | 0.05  | 8.39    | 7.86    |
| PF3D7_0400400   | erythrocyte membrane protein 1, PfEMP1 (VAR)                                                       | -1.66 | 1.18    | 0.33    |
| PF3D7_0400500   | rifin (RIF)                                                                                        | 0.08  | 0.25    | 0.24    |
| PF3D7_0400600   | erythrocyte membrane protein 1 (PfEMP1), exon 1, pseudogene                                        | 0.19  | 0.00    | 0.00    |
| PF3D7_0400700   | rifin (RIF)                                                                                        | 0.30  | 0.45    | 0.50    |
| PF3D7_0400800   | stevor                                                                                             | -2.13 | 0.10    | 0.00    |
| PF3D7_0400900   | rifin (RIF)                                                                                        | 3.36  | 0.00    | 0.19    |
| PF3D7_0401000   | rifin (RIF)                                                                                        | 0.19  | 0.10    | 0.10    |
| PF3D7_0401100   | Plasmodium exported protein, unknown function, fragment                                            | 0.19  | 0.00    | 0.00    |
| PF3D7_0401200   | rifin (RIF)                                                                                        | 0.19  | 0.04    | 0.04    |
| PF3D7_0401300   | rifin (RIF)                                                                                        | 2.51  | 0.00    | 0.08    |
| PF3D7_0401400   | rifin (RIF)                                                                                        | 0.31  | 0.23    | 0.26    |
| PF3D7_0401500   | stevor, pseudogene                                                                                 | 3.44  | 0.19    | 2.10    |
| PF3D7_0401600.1 | rifin (RIF)                                                                                        | 0.07  | 146.63  | 138.97  |
| PF3D7_0401600.2 | PIR protein (RIF)                                                                                  | 0.07  | 146.92  | 139.11  |
| PF3D7_0401700   | Plasmodium exported protein, unknown function, pseudogene                                          | 1.90  | 3.50    | 11.79   |
| PF3D7_0401800   | Plasmodium exported protein (PHISTb), unknown function (PID80)                                     | 1.44  | 37.47   | 91.93   |
| PF3D7_0401900   | acyl-CoA synthetase (ACS6)                                                                         | -1.51 | 39.51   | 12.50   |
| PF3D7_0402000   | Plasmodium exported protein (PHISTa), unknown function                                             | 2.40  | 62.15   | 295.38  |
| PF3D7_0402100   | Plasmodium exported protein (PHISTb), unknown function                                             | -0.56 | 203.10  | 124.27  |
| PF3D7_0402200   | surface-associated interspersed protein 4.1 (SURFIN 4.1), pseudogene (SURF4.1)                     | 2.23  | 10.82   | 45.69   |
| PF3D7_0402300   | reticulocyte binding protein homologue 1 (RH1)                                                     | 1.85  | 4.07    | 13.26   |
| PF3D7_0402400   | Plasmodium exported protein, unknown function (GEXP18)                                             | -1.67 | 619.23  | 175.66  |
| PF3D7_0402500   | rifin, pseudogene (RIF)                                                                            | 2.11  | 0.09    | 0.42    |
| PF3D7_0402600   | stevor                                                                                             | 2.30  | 0.05    | 0.31    |
| PF3D7_0402700   | rifin, pseudogene (RIF)                                                                            | 1.57  | 0.09    | 0.28    |
| PF3D7_0402800   | erythrocyte membrane protein 1 (PfEMP1), pseudogene                                                | -0.73 | 0.16    | 0.08    |
| PF3D7_0402900   | probable protein, unknown function                                                                 | -1.29 | 5.75    | 2.07    |
| PF3D7_0403000   | tRNA Asparagine                                                                                    | 0.19  | 0.00    | 0.00    |
| PF3D7_0403100   | regulator of chromosome condensation, putative                                                     | 0.22  | 7.42    | 7.79    |
| PF3D7_0403200   | conserved Plasmodium protein, unknown function                                                     | 0.75  | 94.15   | 143.09  |

|                 |                                                                   |       |        |         |
|-----------------|-------------------------------------------------------------------|-------|--------|---------|
| PF3D7_0403300   | conserved Plasmodium protein, unknown function                    | -0.76 | 9.37   | 4.97    |
| PF3D7_0403400   | conserved Plasmodium protein, unknown function                    | -0.57 | 26.23  | 15.90   |
| PF3D7_0403500   | ubiquitin specific protease, putative                             | -0.38 | 15.25  | 10.59   |
| PF3D7_0403600   | conserved Plasmodium protein, unknown function                    | -0.61 | 15.50  | 9.16    |
| PF3D7_0403700   | CGI-201 protein, short form                                       | -0.14 | 88.55  | 72.45   |
| PF3D7_0403800   | alpha/beta hydrolase, putative                                    | -0.87 | 56.83  | 28.13   |
| PF3D7_0403900   | SET domain protein, putative (SET8)                               | 0.11  | 7.67   | 7.47    |
| PF3D7_0404000   | conserved Plasmodium protein, unknown function                    | 0.91  | 20.91  | 35.47   |
| PF3D7_0404100   | transcription factor with AP2 domain(s), putative (ApiAP2)        | 0.69  | 0.79   | 1.14    |
| PF3D7_0404200   | conserved Plasmodium protein, unknown function                    | -0.19 | 2.50   | 1.97    |
| PF3D7_0404300   | conserved Plasmodium protein, unknown function                    | 0.71  | 234.68 | 346.98  |
| PF3D7_0404400   | 6-cysteine protein (P36)                                          | -0.18 | 23.68  | 18.89   |
| PF3D7_0404500   | 6-cysteine protein (P52)                                          | -2.00 | 21.60  | 4.86    |
| PF3D7_0404600   | conserved Plasmodium membrane protein, unknown function           | -0.80 | 23.75  | 12.30   |
| PF3D7_0404700   | dipeptidyl aminopeptidase 3 (DPAP3)                               | -0.44 | 60.16  | 40.01   |
| PF3D7_0404800   | conserved Plasmodium protein, unknown function                    | 0.28  | 13.42  | 14.70   |
| PF3D7_0404900   | 6-cysteine protein (P41)                                          | -0.01 | 94.05  | 84.34   |
| PF3D7_0405000   | ATP-dependent RNA helicase, putative                              | -0.51 | 48.56  | 30.80   |
| PF3D7_0405100   | protein transport protein Sec24B (SEC24B)                         | -0.15 | 73.02  | 59.44   |
| PF3D7_0405200   | ag-1 blood stage membrane protein homologue (MAg-1)               | 0.12  | 60.98  | 59.79   |
| PF3D7_0405300   | 6-cysteine protein (LISP2)                                        | 0.31  | 2.01   | 2.24    |
| PF3D7_0405400   | pre-mRNA-processing-splicing factor 8, putative (PRPF8)           | -0.22 | 164.27 | 126.94  |
| PF3D7_0405500   | conserved Plasmodium protein, unknown function                    | -0.11 | 24.09  | 20.20   |
| PF3D7_0405600   | conserved Plasmodium membrane protein, unknown function           | -0.60 | 33.65  | 20.04   |
| PF3D7_0405700   | lysine decarboxylase, putative                                    | 1.25  | 4.68   | 10.02   |
| PF3D7_0405800   | conserved Plasmodium protein, unknown function                    | 0.47  | 9.28   | 11.63   |
| PF3D7_0405900   | apical sushi protein (ASP)                                        | 0.73  | 66.01  | 98.46   |
| PF3D7_0406000   | conserved Plasmodium protein, unknown function                    | -0.08 | 40.19  | 34.21   |
| PF3D7_0406100   | V-type proton ATPase subunit B                                    | 0.11  | 339.39 | 329.79  |
| PF3D7_0406200   | sexual stage-specific protein precursor (Pfs16)                   | 2.92  | 487.97 | 3336.73 |
| PF3D7_0406400   | cytosolic glyoxalase II (cGloII)                                  | -0.83 | 96.47  | 48.82   |
| PF3D7_0406500   | conserved Plasmodium protein, unknown function                    | 1.04  | 187.10 | 345.91  |
| PF3D7_0406600   | conserved Plasmodium protein, unknown function                    | -0.81 | 1.55   | 0.77    |
| PF3D7_0406700   | conserved Plasmodium protein, unknown function                    | 0.70  | 7.34   | 10.74   |
| PF3D7_0406800   | conserved Plasmodium protein, unknown function                    | 1.31  | 5.54   | 12.46   |
| PF3D7_0406900   | conserved Plasmodium protein, unknown function                    | 0.76  | 1.66   | 2.55    |
| PF3D7_0407000   | conserved Plasmodium protein, unknown function                    | -0.84 | 31.43  | 15.83   |
| PF3D7_0407100   | methyltransferase, putative                                       | -0.35 | 18.82  | 13.35   |
| PF3D7_0407200   | peptidyl-tRNA hydrolase 2, putative (PTH2)                        | -0.72 | 61.15  | 33.37   |
| PF3D7_0407300   | transcription factor, putative                                    | -1.80 | 88.95  | 23.08   |
| PF3D7_0407400   | conserved Plasmodium protein, unknown function                    | 0.04  | 5.80   | 5.37    |
| PF3D7_0407500   | mitochondrial carrier protein, putative                           | -1.00 | 14.64  | 6.61    |
| PF3D7_0407600   | conserved Plasmodium protein, unknown function                    | 1.46  | 0.18   | 0.47    |
| PF3D7_0407700   | conserved Plasmodium protein, unknown function                    | 0.16  | 18.81  | 18.98   |
| PF3D7_0407800   | conserved Plasmodium protein, unknown function                    | 0.35  | 48.48  | 55.74   |
| PF3D7_0407900   | AAA family ATPase, putative                                       | 1.19  | 19.68  | 40.52   |
| PF3D7_0408000   | conserved Plasmodium protein, unknown function                    | 0.84  | 18.23  | 29.50   |
| PF3D7_0408100   | conserved Plasmodium protein, unknown function                    | -0.19 | 24.06  | 18.97   |
| PF3D7_0408200   | conserved Plasmodium protein, unknown function                    | -0.65 | 9.91   | 5.69    |
| PF3D7_0408300   | zinc finger, RAN binding protein, putative                        | -0.53 | 86.03  | 53.56   |
| PF3D7_0408400   | conserved Plasmodium protein, unknown function                    | -0.19 | 4.48   | 3.53    |
| PF3D7_0408500   | flap endonuclease 1 (FEN1)                                        | 1.38  | 16.79  | 39.32   |
| PF3D7_0408600   | sporozoite invasion-associated protein 1 (SIAP1)                  | 0.39  | 4.89   | 5.79    |
| PF3D7_0408700   | sporozoite micronemal protein essential for cell traversal (PLP1) | 2.11  | 0.26   | 1.03    |
| PF3D7_0408800   | conserved Plasmodium protein, unknown function                    | 4.28  | 0.00   | 0.39    |
| PF3D7_0408900.1 | tRNA N6-adenosine threonylcarbamoyltransferase (KAE1)             | 1.06  | 6.44   | 12.10   |
| PF3D7_0408900.2 | tRNA N6-adenosine threonylcarbamoyltransferase (KAE1)             | 1.06  | 6.46   | 12.13   |
| PF3D7_0409000   | conserved Plasmodium protein, unknown function                    | -0.89 | 1.33   | 0.65    |
| PF3D7_0409100   | U4/U6 small nuclear ribonucleoprotein PRP31, putative (PRPF31)    | 0.18  | 110.60 | 113.06  |
| PF3D7_0409200   | protein SOF1, putative (SOF1)                                     | 0.08  | 113.48 | 108.33  |
| PF3D7_0409300   | conserved Plasmodium protein, unknown function                    | -0.62 | 21.87  | 12.79   |
| PF3D7_0409400   | heat shock protein 40 (DnaJ)                                      | 0.06  | 52.99  | 49.70   |
| PF3D7_0409500   | conserved Plasmodium protein, unknown function                    | -0.31 | 16.11  | 11.76   |
| PF3D7_0409600   | replication protein A1, large subunit (RPA1)                      | 0.37  | 26.65  | 31.16   |
| PF3D7_0409700   | peptide chain release factor 2, putative                          | 0.71  | 7.35   | 10.87   |
| PF3D7_0409800   | zinc finger protein, putative                                     | -0.75 | 148.71 | 79.73   |
| PF3D7_0409900   | actin-like protein, putative (ALP5b)                              | -0.30 | 12.34  | 9.02    |
| PF3D7_0410000   | erythrocyte vesicle protein 1 (EVP1)                              | -0.67 | 223.84 | 126.82  |
| PF3D7_0410100   | tRNA Serine                                                       | 0.19  | 0.00   | 0.00    |
| PF3D7_0410200   | tRNA Isoleucine                                                   | -0.55 | 1.23   | 0.63    |
| PF3D7_0410300   | protein phosphatase PPM1, putative (PPM1)                         | -0.28 | 41.33  | 30.66   |
| PF3D7_0410400   | exosome complex component RRP4, putative (RRP4)                   | -0.53 | 50.26  | 31.48   |
| PF3D7_0410500   | conserved Plasmodium protein, unknown function                    | 0.48  | 4.08   | 5.13    |
| PF3D7_0410600   | conserved Plasmodium protein, unknown function                    | 0.34  | 53.50  | 61.16   |
| PF3D7_0410700   | ribosome biogenesis GTPase A, putative (RbgA)                     | 0.91  | 39.54  | 66.97   |
| PF3D7_0410800   | conserved Plasmodium protein, unknown function                    | 0.04  | 61.46  | 56.98   |
| PF3D7_0410900   | conserved Plasmodium protein, unknown function                    | -0.80 | 38.58  | 20.00   |
| PF3D7_0411000   | conserved Plasmodium protein, unknown function                    | -1.79 | 139.80 | 36.35   |
| PF3D7_0411100   | conserved Plasmodium protein, unknown function                    | 0.42  | 6.85   | 8.27    |
| PF3D7_0411200   | conserved Plasmodium protein, unknown function                    | 1.32  | 3.30   | 7.42    |
| PF3D7_0411300   | conserved Plasmodium protein, unknown function                    | 0.85  | 4.14   | 6.73    |
| PF3D7_0411400   | DEAD box ATP-dependent RNA helicase, putative                     | -0.54 | 10.94  | 6.79    |
| PF3D7_0411500   | tRNA Alanine                                                      | -1.40 | 0.62   | 0.00    |
| PF3D7_0411600   | tRNA Glutamic acid                                                | 1.51  | 0.31   | 1.28    |
| PF3D7_0411700   | conserved Plasmodium protein, unknown function                    | 1.19  | 0.27   | 0.61    |
| PF3D7_0411800   | conserved Plasmodium protein, unknown function                    | 1.01  | 6.89   | 12.55   |
| PF3D7_0411900   | DNA polymerase alpha                                              | 0.75  | 12.52  | 19.06   |
| PF3D7_0412000   | conserved Plasmodium protein, unknown function                    | 0.95  | 13.84  | 24.13   |
| PF3D7_0412100   | mitochondrial ribosomal protein S12 precursor, putative           | 0.52  | 8.33   | 10.82   |
| PF3D7_0412200   | conserved Plasmodium protein, unknown function                    | -1.44 | 5.72   | 1.89    |
| PF3D7_0412300   | phosphopantothienylcysteine synthetase, putative                  | -1.22 | 3.86   | 1.49    |
| PF3D7_0412400   | erythrocyte membrane protein 1, PfEMP1 (VAR)                      | 0.38  | 8.43   | 9.90    |
| PF3D7_0412500   | Plasmodium RNA of unknown function RUF6-3                         | -1.81 | 0.44   | 0.00    |
| PF3D7_0412600   | rifin, pseudogene (RIF)                                           | 3.36  | 0.00   | 0.18    |
| PF3D7_0412700   | erythrocyte membrane protein 1, PfEMP1 (VAR)                      | -0.18 | 5.49   | 4.37    |
| PF3D7_0412800   | Plasmodium RNA of unknown function                                | -2.13 | 3.87   | 0.66    |
| PF3D7_0412900   | erythrocyte membrane protein 1, PfEMP1 (VAR)                      | -0.65 | 5.40   | 3.10    |
| PF3D7_0413000   | Plasmodium RNA of unknown function RUF6-8                         | -1.81 | 1.77   | 0.33    |

|                 |                                                                        |       |         |         |
|-----------------|------------------------------------------------------------------------|-------|---------|---------|
| PF3D7_0413100   | erythrocyte membrane protein 1, PfEMP1 (VAR)                           | -0.83 | 3.84    | 1.95    |
| PF3D7_0413200   | rifin (RIF)                                                            | 1.77  | 0.00    | 0.04    |
| PF3D7_0413300   | rifin (RIF)                                                            | 1.25  | 0.24    | 0.53    |
| PF3D7_0413400   | erythrocyte membrane protein 1 (PfEMP1), exon 1, pseudogene (VAR)      | 0.60  | 1.11    | 1.52    |
| PF3D7_0413500   | phosphoglucosyltransferase-2 (PGM2)                                    | 0.19  | 43.69   | 45.10   |
| PF3D7_0413600   | 26S protease regulatory subunit 6B, putative (RPT3)                    | 0.07  | 199.79  | 189.44  |
| PF3D7_0413700   | lysine decarboxylase-like protein, putative                            | 0.09  | 38.28   | 36.69   |
| PF3D7_0413800   | 50S ribosomal protein L10, putative                                    | -0.80 | 4.68    | 2.40    |
| PF3D7_0413900   | ubiquitin carboxyl-terminal hydrolase 13, putative (USP13)             | 0.04  | 49.53   | 45.96   |
| PF3D7_0414000   | chromosome associated protein, putative                                | 0.94  | 14.40   | 24.89   |
| PF3D7_0414100   | conserved Plasmodium membrane protein, unknown function                | 0.34  | 1.19    | 1.36    |
| PF3D7_0414200.1 | calmodulin-like protein                                                | -1.10 | 6.72    | 2.80    |
| PF3D7_0414200.2 | calmodulin-like protein                                                | -1.08 | 6.63    | 2.80    |
| PF3D7_0414300   | Rab5-interacting protein, putative                                     | -0.88 | 26.36   | 12.91   |
| PF3D7_0414400   | conserved Plasmodium protein, unknown function                         | 1.63  | 0.14    | 0.42    |
| PF3D7_0414500   | RNA-binding protein, putative                                          | 2.55  | 2.54    | 13.54   |
| PF3D7_0414600   | conserved protein, unknown function                                    | 1.23  | 16.52   | 34.90   |
| PF3D7_0414700   | GTP-binding protein, putative                                          | 0.87  | 13.74   | 22.73   |
| PF3D7_0414800   | conserved Plasmodium protein, unknown function                         | 0.76  | 11.91   | 18.16   |
| PF3D7_0414900   | armadillo-domain containing rhopty protein (ARO)                       | 0.74  | 66.68   | 100.63  |
| PF3D7_0415000   | arsenical pump-driving ATPase, putative                                | -1.54 | 85.61   | 26.61   |
| PF3D7_0415100   | conserved Plasmodium protein, unknown function                         | -1.34 | 15.51   | 5.53    |
| PF3D7_0415200   | conserved Plasmodium protein, unknown function                         | -0.25 | 4.48    | 3.39    |
| PF3D7_0415300   | cdc2-related protein kinase 3 (CRK3)                                   | 0.00  | 104.10  | 94.00   |
| PF3D7_0415400   | coatomer subunit zeta, putative                                        | -1.47 | 130.50  | 42.42   |
| PF3D7_0415500   | nuclear cap-binding protein, putative                                  | -0.45 | 103.52  | 68.37   |
| PF3D7_0415600   | GTP:AMP phosphotransferase (GAK)                                       | 0.17  | 2.01    | 2.04    |
| PF3D7_0415700   | conserved Plasmodium protein, unknown function                         | -1.33 | 4.43    | 1.58    |
| PF3D7_0415800   | RING zinc finger protein, putative                                     | 1.17  | 3.02    | 6.15    |
| PF3D7_0415900   | 60S ribosomal protein L15, putative                                    | -0.20 | 2134.74 | 1679.25 |
| PF3D7_0416000   | RNA-binding protein, putative                                          | 0.22  | 40.59   | 42.59   |
| PF3D7_0416100   | glutamyl-tRNA(Gln) amidotransferase subunit A, putative                | 0.63  | 22.37   | 31.35   |
| PF3D7_0416200   | conserved protein, unknown function                                    | 0.83  | 53.31   | 85.40   |
| PF3D7_0416300   | DNA helicase MCM9, putative (MCM9)                                     | 0.01  | 12.24   | 11.11   |
| PF3D7_0416400   | histone acetyltransferase, putative (HAT1)                             | 0.64  | 51.35   | 72.01   |
| PF3D7_0416500   | repressor of RNA polymerase III transcription MAF1, putative           | 0.26  | 8.69    | 9.37    |
| PF3D7_0416600   | prohibitin-like protein, putative                                      | -0.83 | 8.32    | 4.21    |
| PF3D7_0416700   | CDGSH iron-sulfur domain-containing protein, putative                  | 0.49  | 26.22   | 33.35   |
| PF3D7_0416800   | small GTP-binding protein sar1 (SAR1)                                  | 0.27  | 346.21  | 377.19  |
| PF3D7_0416900   | conserved Plasmodium protein, unknown function                         | -0.51 | 15.31   | 9.72    |
| PF3D7_0417000   | conserved Plasmodium protein, unknown function                         | 1.30  | 1.46    | 3.28    |
| PF3D7_0417100   | mRNA-binding protein PUF2 (PUF2)                                       | 1.51  | 0.19    | 0.51    |
| PF3D7_0417200   | bifunctional dihydrofolate reductase-thymidylate synthase (DHFR-TS)    | -0.05 | 22.69   | 19.73   |
| PF3D7_0417300   | LETM1-like protein, putative                                           | -0.30 | 39.98   | 29.38   |
| PF3D7_0417400   | conserved Plasmodium protein, unknown function                         | -0.51 | 37.98   | 24.06   |
| PF3D7_0417500   | memo-like protein                                                      | 1.09  | 20.04   | 38.49   |
| PF3D7_0417600   | conserved Plasmodium protein, unknown function                         | 1.27  | 2.95    | 6.40    |
| PF3D7_0417700   | conserved Plasmodium protein, unknown function                         | 0.32  | 2.27    | 2.55    |
| PF3D7_0417800   | cdc2-related protein kinase 1 (CRK1)                                   | 0.32  | 16.32   | 18.44   |
| PF3D7_0417900   | conserved Plasmodium protein, unknown function                         | 0.00  | 1.81    | 1.64    |
| PF3D7_0418000   | conserved Plasmodium protein, unknown function                         | 1.01  | 2.51    | 4.58    |
| PF3D7_0418100   | conserved Plasmodium protein, unknown function                         | -1.29 | 51.12   | 18.88   |
| PF3D7_0418200   | eukaryotic translation initiation factor 3 subunit M, putative (EIF3M) | -0.52 | 180.01  | 113.26  |
| PF3D7_0418300   | conserved Plasmodium protein, unknown function                         | -0.29 | 903.05  | 665.33  |
| PF3D7_0418400   | conserved Plasmodium protein, unknown function                         | -0.44 | 18.06   | 12.00   |
| PF3D7_0418500   | trafficking protein particle complex subunit 3, putative (BET3)        | -0.54 | 19.98   | 12.37   |
| PF3D7_0418600   | regulator of chromosome condensation, putative                         | 1.73  | 9.79    | 29.29   |
| PF3D7_0418700   | RNA-binding protein NOB1, putative                                     | -0.40 | 126.32  | 86.58   |
| PF3D7_0418800   | conserved Plasmodium protein, unknown function                         | -0.10 | 1.40    | 1.17    |
| PF3D7_0418900   | conserved Plasmodium protein, unknown function                         | 1.64  | 2.56    | 7.21    |
| PF3D7_0419000   | conserved Plasmodium protein, unknown function                         | 2.28  | 0.80    | 3.55    |
| PF3D7_0419100   | conserved Plasmodium protein, unknown function                         | 0.68  | 1.75    | 2.54    |
| PF3D7_0419200   | CGI-141 protein homolog, putative                                      | -1.63 | 17.66   | 5.10    |
| PF3D7_0419300   | conserved Plasmodium protein, unknown function                         | -0.43 | 11.71   | 7.85    |
| PF3D7_0419400   | conserved Plasmodium protein, unknown function                         | -1.38 | 13.66   | 4.72    |
| PF3D7_0419500   | conserved Plasmodium membrane protein, unknown function                | -0.83 | 34.76   | 17.61   |
| PF3D7_0419600   | ran binding protein 1, putative                                        | 0.87  | 577.48  | 954.15  |
| PF3D7_0419700   | apical merozoite protein (Pf34)                                        | -0.48 | 44.94   | 29.03   |
| PF3D7_0419800   | 60S ribosomal protein L7ae/L30e, putative                              | -0.39 | 125.29  | 86.03   |
| PF3D7_0419900   | phosphatidylinositol 4-kinase, putative                                | -1.16 | 66.44   | 26.77   |
| PF3D7_0420000   | zinc finger protein, putative                                          | -0.20 | 70.44   | 55.41   |
| PF3D7_0420100   | serine/threonine protein kinase RIO2 (RIO2)                            | -0.19 | 86.03   | 68.15   |
| PF3D7_0420200   | holo-[acyl-carrier-protein] synthase, putative (ACPS)                  | 0.06  | 4.47    | 4.19    |
| PF3D7_0420300   | transcription factor with AP2 domain(s) (ApiAP2)                       | 0.04  | 73.11   | 67.65   |
| PF3D7_0420400   | ribosome-recycling factor (RRF2)                                       | 0.58  | 6.88    | 9.29    |
| PF3D7_0420500   | conserved Plasmodium protein, unknown function                         | -0.07 | 2.25    | 1.93    |
| PF3D7_0420600   | conserved Plasmodium protein, unknown function                         | -0.58 | 25.15   | 15.22   |
| PF3D7_0420700   | erythrocyte membrane protein 1, PfEMP1 (VAR)                           | 1.29  | 6.39    | 14.07   |
| PF3D7_0420800   | Plasmodium RNA of unknown function RUF6                                | -1.40 | 0.44    | 0.00    |
| PF3D7_0420900   | erythrocyte membrane protein 1, PfEMP1 (VAR)                           | 0.76  | 14.43   | 21.99   |
| PF3D7_0421000   | unspecified product                                                    | -0.81 | 0.22    | 0.00    |
| PF3D7_0421100   | erythrocyte membrane protein 1, PfEMP1 (VAR)                           | 0.52  | 9.83    | 12.73   |
| PF3D7_0421200   | rifin (RIF)                                                            | -1.10 | 0.45    | 0.18    |
| PF3D7_0421300   | erythrocyte membrane protein 1, PfEMP1 (VAR)                           | -0.59 | 2.70    | 1.62    |
| PF3D7_0421400   | Plasmodium RNA of unknown function RUF6-5                              | 0.19  | 0.00    | 0.00    |
| PF3D7_0421500   | rifin, pseudogene (RIF)                                                | 3.36  | 0.00    | 0.18    |
| PF3D7_0421600   | erythrocyte membrane protein 1 (PfEMP1)-like pseudogene (VAR)          | 0.93  | 0.03    | 0.07    |
| PF3D7_0421700   | conserved Plasmodium protein, unknown function                         | 2.74  | 0.02    | 0.16    |
| PF3D7_0421800   | conserved Plasmodium protein, unknown function                         | -0.40 | 0.18    | 0.09    |
| PF3D7_0421900   | conserved Plasmodium protein, unknown function                         | 1.19  | 0.21    | 0.53    |
| PF3D7_0422000   | steroid dehydrogenase, putative                                        | 1.16  | 11.94   | 24.15   |
| PF3D7_0422100   | transmembrane emp24 domain-containing protein, putative                | -0.92 | 59.98   | 28.58   |
| PF3D7_0422200   | erythrocyte membrane-associated antigen                                | -0.74 | 29.13   | 15.69   |
| PF3D7_0422300   | alpha tubulin 2                                                        | 1.04  | 112.36  | 208.67  |
| PF3D7_0422400   | 40S ribosomal protein S19 (RPS19)                                      | 0.03  | 1642.03 | 1515.09 |
| PF3D7_0422500   | pre-mRNA-splicing helicase BRR2, putative (BRR2)                       | -0.54 | 111.55  | 69.16   |
| PF3D7_0422600   | conserved Plasmodium protein, unknown function                         | -1.23 | 17.16   | 6.59    |
| PF3D7_0422700   | eukaryotic initiation factor, putative                                 | 0.14  | 101.95  | 101.01  |

|                 |                                                                               |       |         |         |
|-----------------|-------------------------------------------------------------------------------|-------|---------|---------|
| PF3D7_0422800   | serpentine receptor, putative (SR12)                                          | 0.01  | 4.55    | 4.14    |
| PF3D7_0422900   | conserved Plasmodium protein, unknown function                                | 1.02  | 2.95    | 5.43    |
| PF3D7_0423000   | conserved Plasmodium protein, unknown function                                | -0.36 | 21.06   | 14.82   |
| PF3D7_0423100   | AP-4 complex subunit sigma, putative                                          | -0.01 | 78.68   | 70.50   |
| PF3D7_0423200   | BSD-domain protein, putative                                                  | -0.64 | 51.78   | 29.87   |
| PF3D7_0423300   | conserved Plasmodium protein, unknown function                                | 0.32  | 20.77   | 23.35   |
| PF3D7_0423400   | asparagine-rich protein (AARP)                                                | 0.23  | 33.05   | 34.86   |
| PF3D7_0423500   | glideosome associated protein with multiple membrane spans 2 (GAPM2)          | -0.04 | 200.54  | 176.09  |
| PF3D7_0423600   | conserved Plasmodium protein, unknown function                                | -0.14 | 64.13   | 52.39   |
| PF3D7_0423700   | early transcribed membrane protein 4 (ETRAMP4)                                | 0.80  | 466.41  | 733.99  |
| PF3D7_0423800   | cysteine-rich protective antigen (CyRPA)                                      | 0.78  | 30.30   | 46.97   |
| PF3D7_0423900   | probable protein, unknown function                                            | 0.47  | 17.21   | 21.56   |
| PF3D7_0424000   | Plasmodium exported protein (PHISTc), unknown function                        | 0.48  | 5.88    | 7.41    |
| PF3D7_0424100   | reticulocyte binding protein homologue 5 (RH5)                                | 0.54  | 9.35    | 12.31   |
| PF3D7_0424200   | reticulocyte binding protein homologue 4 (RH4)                                | 1.59  | 4.09    | 11.11   |
| PF3D7_0424300   | erythrocyte binding antigen-165, pseudogene (EBA165)                          | 0.98  | 6.38    | 11.34   |
| PF3D7_0424400   | surface-associated interspersed protein 4.2 (SURFIN 4.2) (SURF4.2)            | 1.77  | 0.41    | 1.26    |
| PF3D7_0424500   | serine/threonine protein kinase, FIKK family (FIKK4.1)                        | -0.97 | 259.24  | 119.07  |
| PF3D7_0424600   | Plasmodium exported protein (PHISTb), unknown function                        | -0.40 | 475.52  | 324.20  |
| PF3D7_0424700   | serine/threonine protein kinase, FIKK family (FIKK4.2)                        | -0.48 | 315.98  | 204.69  |
| PF3D7_0424800   | Plasmodium exported protein (PHISTb), unknown function                        | -0.34 | 271.62  | 193.23  |
| PF3D7_0424900   | Plasmodium exported protein (PHISTa), unknown function                        | -1.01 | 1882.65 | 841.98  |
| PF3D7_0425000   | Plasmodium exported protein, unknown function, pseudogene                     | 0.19  | 0.55    | 0.57    |
| PF3D7_0425100   | Plasmodium exported protein (hyp6), unknown function                          | -2.02 | 152.19  | 33.80   |
| PF3D7_0425200   | Plasmodium exported protein (hyp15), unknown function                         | -1.43 | 114.65  | 38.42   |
| PF3D7_0425300   | Plasmodium exported protein (PHISTa), unknown function, pseudogene            | -0.13 | 0.13    | 0.10    |
| PF3D7_0425400   | Plasmodium exported protein (PHISTa), unknown function                        | -0.42 | 26.71   | 17.97   |
| PF3D7_0425500   | stevor                                                                        | 2.28  | 0.24    | 1.16    |
| PF3D7_0425600   | rifin, pseudogene (RIF)                                                       | 3.39  | 0.10    | 1.13    |
| PF3D7_0425700   | rifin (RIF)                                                                   | -1.62 | 0.30    | 0.07    |
| PF3D7_0425800   | erythrocyte membrane protein 1, PfEMP1 (VAR)                                  | -1.09 | 1.34    | 0.57    |
| PF3D7_0425900   | rifin (RIF)                                                                   | -0.42 | 1.77    | 1.18    |
| PF3D7_0426000   | erythrocyte membrane protein 1, PfEMP1 (VAR)                                  | 0.42  | 0.92    | 1.12    |
| PF3D7_0500100   | erythrocyte membrane protein 1, PfEMP1 (VAR)                                  | -0.40 | 3.36    | 2.29    |
| PF3D7_0500200   | erythrocyte membrane protein 1 (PfEMP1), pseudogene                           | 1.19  | 0.00    | 0.32    |
| PF3D7_0500300   | rifin, pseudogene (RIF)                                                       | 1.77  | 0.13    | 0.45    |
| PF3D7_0500400   | rifin (RIF)                                                                   | 0.48  | 0.16    | 0.20    |
| PF3D7_0500500   | rifin (RIF)                                                                   | 1.19  | 0.10    | 0.22    |
| PF3D7_0500600   | stevor, pseudogene                                                            | 2.19  | 0.39    | 1.67    |
| PF3D7_0500700   | rifin, pseudogene (RIF)                                                       | 3.00  | 0.00    | 0.50    |
| PF3D7_0500800   | mature parasite-infected erythrocyte surface antigen (MESA)                   | 1.16  | 254.43  | 512.78  |
| PF3D7_0500900   | serine/threonine protein kinase, FIKK family (FIKK5)                          | -0.22 | 9.53    | 7.38    |
| PF3D7_0501000   | Plasmodium exported protein, unknown function                                 | -0.07 | 353.45  | 302.98  |
| PF3D7_0501100.1 | heat shock protein 40, type II (HSP40)                                        | -0.28 | 484.70  | 360.75  |
| PF3D7_0501100.2 | heat shock protein 40, type II (HSP40)                                        | -0.29 | 484.70  | 356.45  |
| PF3D7_0501200   | parasite-infected erythrocyte surface protein (PIESP2)                        | -0.03 | 117.11  | 103.66  |
| PF3D7_0501300   | skeleton-binding protein 1 (SBP1)                                             | -0.04 | 6299.54 | 5538.72 |
| PF3D7_0501400   | interspersed repeat antigen (FIRA)                                            | 0.11  | 2618.12 | 2541.46 |
| PF3D7_0501500   | rho-try-associated protein 3 (RAP3)                                           | 0.15  | 94.59   | 94.86   |
| PF3D7_0501600   | rho-try-associated protein 2 (RAP2)                                           | -0.17 | 167.84  | 134.79  |
| PF3D7_0501700   | anaphase promoting complex subunit, putative                                  | 0.80  | 0.45    | 0.72    |
| PF3D7_0501800   | chromosome assembly factor 1 (CAF1)                                           | 1.17  | 23.77   | 48.35   |
| PF3D7_0501900   | conserved protein, unknown function                                           | -0.83 | 15.34   | 7.76    |
| PF3D7_0502000   | vacuolar protein sorting-associated protein 11, putative (VPS11)              | -0.97 | 35.81   | 16.51   |
| PF3D7_0502100   | HCNGP-like protein                                                            | -1.58 | 10.71   | 3.20    |
| PF3D7_0502200   | conserved Plasmodium membrane protein, unknown function                       | -0.91 | 19.44   | 9.30    |
| PF3D7_0502300   | conserved Plasmodium protein, unknown function                                | 1.91  | 0.49    | 1.73    |
| PF3D7_0502400   | merozoite surface protein 8 (MSP8)                                            | -0.92 | 272.89  | 130.44  |
| PF3D7_0502500   | conserved Plasmodium protein, unknown function                                | -2.33 | 1.86    | 0.32    |
| PF3D7_0502600   | conserved Plasmodium protein, unknown function                                | -0.53 | 5.45    | 3.42    |
| PF3D7_0502700   | conserved Plasmodium protein, unknown function                                | -0.64 | 7.30    | 4.21    |
| PF3D7_0502800   | DnaJ protein, putative                                                        | -0.34 | 30.30   | 21.53   |
| PF3D7_0502900   | mitochondrial inner membrane TIM10 associated protein, putative               | 0.51  | 23.57   | 30.24   |
| PF3D7_0503000   | 50S ribosomal protein L28, apicoplast, putative                               | 1.43  | 20.90   | 50.76   |
| PF3D7_0503100   | 4-diphosphocytidyl-2-C-methyl-D-erythritol kinase, putative (IspE)            | -0.47 | 7.83    | 5.08    |
| PF3D7_0503200   | conserved Plasmodium protein, unknown function                                | 0.77  | 10.39   | 16.03   |
| PF3D7_0503300   | serine/arginine-rich splicing factor 12 (SRSF12)                              | 0.32  | 321.50  | 361.20  |
| PF3D7_0503400   | actin-depolymerizing factor 1 (ADF1)                                          | 0.95  | 160.68  | 279.29  |
| PF3D7_0503500   | protein kinase, putative                                                      | 0.05  | 7.53    | 7.02    |
| PF3D7_0503600   | myosin B (MyoB)                                                               | 0.92  | 20.99   | 35.92   |
| PF3D7_0503800   | 60S ribosomal protein L31 (RPL31)                                             | 0.24  | 429.36  | 458.51  |
| PF3D7_0503900   | conserved Plasmodium protein, unknown function                                | -0.04 | 2.26    | 1.99    |
| PF3D7_0504000   | cation transporting P-ATPase (ATPase3)                                        | 0.24  | 10.96   | 11.66   |
| PF3D7_0504100   | AN1-like zinc finger family protein                                           | 0.43  | 6.86    | 8.35    |
| PF3D7_0504200   | ATP-dependent helicase, putative                                              | 0.76  | 6.35    | 9.74    |
| PF3D7_0504300   | conserved Plasmodium protein, unknown function                                | -0.85 | 2.49    | 1.23    |
| PF3D7_0504400   | ATP-dependent helicase, putative                                              | 0.67  | 16.71   | 24.03   |
| PF3D7_0504500   | conserved Plasmodium protein, unknown function                                | 1.35  | 1.08    | 2.53    |
| PF3D7_0504600   | 2-oxoisovalerate dehydrogenase subunit beta, mitochondrial, putative (BCKDHB) | 0.41  | 28.62   | 34.28   |
| PF3D7_0504700   | centrosomal protein CEP120, putative (CEP120)                                 | 2.04  | 5.22    | 19.43   |
| PF3D7_0504800   | conserved Plasmodium protein, unknown function                                | -0.34 | 12.06   | 8.58    |
| PF3D7_0504900   | conserved protein, unknown function                                           | 0.67  | 15.88   | 22.81   |
| PF3D7_0505000   | conserved Plasmodium membrane protein, unknown function                       | -1.91 | 53.04   | 12.69   |
| PF3D7_0505100   | trafficking protein particle complex subunit 8, putative (TRS85)              | -0.73 | 36.53   | 19.92   |
| PF3D7_0505200   | actin-like protein, putative (ALP2b)                                          | 0.26  | 9.71    | 10.46   |
| PF3D7_0505300   | UDP-N-acetyl glucosamine:UMP antiporter                                       | -0.67 | 0.96    | 0.54    |
| PF3D7_0505400   | conserved Plasmodium protein, unknown function                                | 0.63  | 14.21   | 19.78   |
| PF3D7_0505500   | DNA mismatch repair protein MSH6, putative (MSH6)                             | 0.34  | 21.60   | 24.73   |
| PF3D7_0505600   | conserved Plasmodium protein, unknown function                                | -1.04 | 18.04   | 7.93    |
| PF3D7_0505700   | conserved Plasmodium membrane protein, unknown function                       | 0.24  | 57.99   | 61.78   |
| PF3D7_0505800   | small ubiquitin-related modifier (SUMO)                                       | 0.14  | 290.97  | 289.05  |
| PF3D7_0505900   | conserved Plasmodium protein, unknown function                                | 0.37  | 57.20   | 66.49   |
| PF3D7_0506000   | conserved Plasmodium protein, unknown function                                | -1.75 | 16.29   | 4.35    |
| PF3D7_0506100   | 60S ribosomal subunit protein L24-2, putative                                 | -0.63 | 94.84   | 55.12   |
| PF3D7_0506200   | TATA-box-binding protein (TBP)                                                | -0.96 | 34.69   | 16.03   |
| PF3D7_0506300   | conserved Plasmodium protein, unknown function                                | 0.90  | 4.72    | 7.94    |
| PF3D7_0506400   | conserved Plasmodium protein, unknown function                                | 0.65  | 1.28    | 1.84    |
| PF3D7_0506500   | conserved Plasmodium protein, unknown function                                | 0.63  | 11.71   | 16.40   |

|               |                                                                                       |       |         |         |
|---------------|---------------------------------------------------------------------------------------|-------|---------|---------|
| PF3D7_0506600 | histone deacetylase, putative, pseudogene                                             | -0.28 | 2.10    | 1.55    |
| PF3D7_0506700 | GTPase-activating protein, putative                                                   | -0.33 | 31.96   | 22.93   |
| PF3D7_0506800 | transcription factor 25, putative (TCF25)                                             | -0.45 | 74.72   | 49.44   |
| PF3D7_0506900 | rhomboid protease ROM4 (ROM4)                                                         | 0.77  | 74.38   | 114.63  |
| PF3D7_0507000 | conserved Plasmodium protein, unknown function                                        | -0.12 | 2.47    | 2.03    |
| PF3D7_0507100 | 60S ribosomal protein L4 (RPL4)                                                       | -0.15 | 2239.80 | 1823.25 |
| PF3D7_0507200 | subtilisin-like protease 3 (SUB3)                                                     | -0.64 | 19.46   | 11.24   |
| PF3D7_0507300 | conserved Plasmodium protein, unknown function                                        | 0.88  | 3.99    | 6.65    |
| PF3D7_0507400 | conserved Plasmodium protein, unknown function                                        | 0.10  | 8.44    | 8.18    |
| PF3D7_0507500 | subtilisin-like protease 1 (SUB1)                                                     | 2.58  | 21.12   | 114.28  |
| PF3D7_0507600 | cell differentiation protein, putative (CAF40)                                        | -0.42 | 67.39   | 45.38   |
| PF3D7_0507700 | nuclear protein localization protein 4, putative (NPL4)                               | 0.35  | 47.12   | 54.24   |
| PF3D7_0507800 | conserved Plasmodium protein, unknown function                                        | -0.26 | 157.38  | 118.65  |
| PF3D7_0507900 | conserved Plasmodium protein, unknown function                                        | -0.03 | 36.45   | 32.14   |
| PF3D7_0508000 | 6-cysteine protein (P38)                                                              | 0.29  | 82.77   | 91.44   |
| PF3D7_0508100 | SET domain protein, putative (SET9)                                                   | -0.08 | 48.70   | 41.62   |
| PF3D7_0508200 | longevity-assurance (LAG1) protein, putative                                          | 0.98  | 8.37    | 14.92   |
| PF3D7_0508300 | triose phosphate transporter (TPT)                                                    | -1.08 | 56.05   | 23.84   |
| PF3D7_0508400 | transcription factor IIb, putative                                                    | 0.36  | 6.02    | 6.97    |
| PF3D7_0508500 | guanidine nucleotide exchange factor (RCC1)                                           | 0.03  | 21.08   | 19.38   |
| PF3D7_0508600 | conserved Plasmodium protein, unknown function                                        | 0.22  | 75.38   | 79.48   |
| PF3D7_0508700 | pre-mRNA-processing ATP-dependent RNA helicase PRP5, putative (PRP5)                  | 0.10  | 46.82   | 45.21   |
| PF3D7_0508800 | single-stranded DNA-binding protein (SSB)                                             | 0.06  | 44.09   | 41.53   |
| PF3D7_0508900 | conserved Plasmodium protein, unknown function                                        | 0.84  | 45.64   | 73.90   |
| PF3D7_0509000 | SNAP protein (soluble N-ethylmaleimide-sensitive factor attachment protein), putative | 0.18  | 46.85   | 47.86   |
| PF3D7_0509100 | chromosome condensation protein, putative                                             | 0.96  | 15.39   | 26.98   |
| PF3D7_0509200 | leucine-rich repeat protein (LRR2)                                                    | 0.82  | 0.70    | 1.13    |
| PF3D7_0509300 | conserved Plasmodium protein, unknown function                                        | 0.16  | 23.82   | 24.09   |
| PF3D7_0509400 | RNA polymerase I (RNAPI)                                                              | -0.63 | 130.36  | 75.77   |
| PF3D7_0509500 | conserved Plasmodium protein, unknown function                                        | -0.02 | 6.48    | 5.78    |
| PF3D7_0509600 | asparagine-tRNA ligase (AsnRS)                                                        | -0.01 | 28.92   | 25.91   |
| PF3D7_0509700 | conserved Plasmodium protein, unknown function                                        | 1.36  | 2.30    | 5.37    |
| PF3D7_0509800 | phosphatidylinositol 4-kinase (PI4K)                                                  | -0.11 | 71.01   | 59.29   |
| PF3D7_0509900 | conserved Plasmodium protein, unknown function                                        | -0.04 | 3.34    | 2.92    |
| PF3D7_0510000 | conserved Plasmodium protein, unknown function                                        | 1.35  | 6.85    | 15.76   |
| PF3D7_0510100 | conserved Plasmodium protein, unknown function                                        | -0.43 | 40.41   | 27.02   |
| PF3D7_0510200 | peptidyl-prolyl cis-trans isomerase (CYP87)                                           | 0.19  | 36.78   | 37.93   |
| PF3D7_0510300 | stripes inner membrane complex protein, putative (SIP)                                | 2.03  | 1.78    | 6.65    |
| PF3D7_0510400 | conserved Plasmodium protein, unknown function                                        | -1.20 | 19.36   | 7.59    |
| PF3D7_0510500 | topoisomerase I (TopoI)                                                               | -0.09 | 45.64   | 38.74   |
| PF3D7_0510600 | tRNA Leucine                                                                          | 0.19  | 0.00    | 0.00    |
| PF3D7_0510700 | conserved Plasmodium protein, unknown function                                        | -0.08 | 3.26    | 2.78    |
| PF3D7_0510800 | WD repeat-containing protein, putative                                                | 1.82  | 0.81    | 2.61    |
| PF3D7_0510900 | small nucleolar RNA snoR04                                                            | 0.97  | 2.41    | 4.37    |
| PF3D7_0511000 | translationally-controlled tumor protein homolog (TCTP)                               | -0.28 | 515.06  | 383.08  |
| PF3D7_0511100 | conserved Plasmodium protein, unknown function                                        | -1.43 | 5.48    | 1.79    |
| PF3D7_0511200 | stearoyl-CoA desaturase (SCD)                                                         | -0.42 | 21.65   | 14.64   |
| PF3D7_0511300 | MORN repeat protein, putative                                                         | -0.79 | 6.32    | 3.29    |
| PF3D7_0511400 | conserved Plasmodium protein, unknown function                                        | 1.01  | 1.58    | 2.89    |
| PF3D7_0511500 | RNA pseudouridylylase synthase, putative                                              | 0.02  | 106.05  | 96.76   |
| PF3D7_0511600 | apical rho try neck protein (ARNP)                                                    | -0.47 | 21.29   | 13.88   |
| PF3D7_0511700 | EKC/KEOPS complex subunit CGI121 (CGI121)                                             | -0.61 | 23.56   | 13.90   |
| PF3D7_0511800 | inositol-3-phosphate synthase (INO1)                                                  | -1.11 | 384.55  | 160.89  |
| PF3D7_0511900 | conserved Plasmodium protein, unknown function                                        | -2.40 | 6.94    | 1.18    |
| PF3D7_0512000 | prefoldin subunit, putative                                                           | 1.13  | 26.07   | 51.50   |
| PF3D7_0512100 | conserved Plasmodium protein, unknown function                                        | -0.02 | 5.56    | 4.94    |
| PF3D7_0512200 | glutathione synthetase (GS)                                                           | -0.42 | 16.24   | 10.98   |
| PF3D7_0512300 | CDK-activating kinase assembly factor (MAT1)                                          | -0.83 | 42.83   | 21.68   |
| PF3D7_0512400 | conserved Plasmodium protein, unknown function                                        | -1.76 | 9.91    | 2.61    |
| PF3D7_0512500 | conserved Plasmodium protein, unknown function                                        | -0.99 | 8.36    | 3.80    |
| PF3D7_0512600 | ras-related protein Rab-1B (RAB1b)                                                    | -0.22 | 242.24  | 187.91  |
| PF3D7_0512700 | orotate phosphoribosyltransferase (OPRT)                                              | -1.24 | 40.06   | 15.27   |
| PF3D7_0512800 | conserved Plasmodium protein, unknown function                                        | 0.48  | 3.50    | 4.40    |
| PF3D7_0512900 | conserved Plasmodium protein, unknown function                                        | -0.93 | 6.57    | 3.09    |
| PF3D7_0513000 | conserved Plasmodium protein, unknown function                                        | 0.55  | 12.53   | 16.52   |
| PF3D7_0513100 | conserved Plasmodium protein, unknown function                                        | -0.77 | 42.58   | 22.57   |
| PF3D7_0513200 | conserved Plasmodium protein, unknown function                                        | -0.69 | 52.25   | 29.30   |
| PF3D7_0513300 | purine nucleoside phosphorylase (PNP)                                                 | 0.48  | 478.47  | 600.97  |
| PF3D7_0513400 | GTP-binding protein, putative                                                         | 0.04  | 9.21    | 8.53    |
| PF3D7_0513500 | mitochondrial import inner membrane translocase subunit TIM16, putative (PAM16)       | -1.95 | 28.97   | 6.69    |
| PF3D7_0513600 | deoxyribodipyrimidine photo-lyase, putative                                           | 1.26  | 27.29   | 59.02   |
| PF3D7_0513700 | secreted ookinete protein, putative (PSOP12)                                          | 0.52  | 2.18    | 2.83    |
| PF3D7_0513800 | ras-related protein Rab-1A (RAB1a)                                                    | 0.60  | 18.81   | 25.72   |
| PF3D7_0513900 | conserved Plasmodium protein, unknown function                                        | 1.00  | 3.81    | 6.88    |
| PF3D7_0514000 | tubulin-tyrosine ligase, putative (TTL)                                               | 0.48  | 4.36    | 5.49    |
| PF3D7_0514100 | ATP-dependent DNA helicase UvrD (UvrD)                                                | 0.30  | 7.46    | 8.28    |
| PF3D7_0514200 | conserved Plasmodium protein, unknown function                                        | -0.19 | 11.29   | 8.94    |
| PF3D7_0514300 | aspartate-tRNA ligase, putative                                                       | 0.72  | 7.21    | 10.71   |
| PF3D7_0514400 | tRNA Phenylalanine                                                                    | 0.77  | 0.31    | 0.63    |
| PF3D7_0514500 | conserved Plasmodium membrane protein, unknown function                               | 1.12  | 1.14    | 2.27    |
| PF3D7_0514600 | ribose 5-phosphate epimerase, putative                                                | 0.20  | 30.09   | 31.29   |
| PF3D7_0514700 | conserved Plasmodium protein, unknown function                                        | 0.95  | 0.27    | 0.48    |
| PF3D7_0514800 | kinase, putative                                                                      | -1.17 | 18.69   | 7.46    |
| PF3D7_0514900 | conserved Plasmodium protein, unknown function                                        | -0.48 | 35.14   | 22.79   |
| PF3D7_0515000 | pre-mRNA-splicing factor CWC2, putative (CWC2)                                        | -0.25 | 145.04  | 109.98  |
| PF3D7_0515100 | rhomboid protease ROM9 (ROM9)                                                         | -0.04 | 4.12    | 3.61    |
| PF3D7_0515200 | conserved Plasmodium protein, unknown function                                        | -0.07 | 4.12    | 3.54    |
| PF3D7_0515300 | phosphatidylinositol 3-kinase (PI3K)                                                  | 0.21  | 20.46   | 21.38   |
| PF3D7_0515400 | conserved Plasmodium protein, unknown function                                        | 0.10  | 43.34   | 41.78   |
| PF3D7_0515500 | amino acid transporter, putative                                                      | 0.41  | 1.20    | 1.44    |
| PF3D7_0515600 | conserved Plasmodium protein, unknown function                                        | 1.21  | 1.83    | 3.82    |
| PF3D7_0515700 | glideosome-associated protein 40, putative (GAP40)                                    | 0.72  | 328.94  | 490.17  |
| PF3D7_0515800 | BolA-like protein, putative                                                           | -0.19 | 20.29   | 16.08   |
| PF3D7_0515900 | NLI interacting factor-like phosphatase, putative (NIF2)                              | -0.89 | 16.02   | 7.79    |
| PF3D7_0516000 | RAP protein, putative                                                                 | 1.25  | 2.62    | 5.65    |
| PF3D7_0516100 | cation-transporting ATPase 1 (ATPase1)                                                | 0.05  | 3.08    | 2.86    |
| PF3D7_0516200 | 40S ribosomal protein S11                                                             | -0.07 | 1070.76 | 920.14  |
| PF3D7_0516300 | tRNA pseudouridine synthase, putative                                                 | -0.59 | 75.57   | 45.32   |



|               |                                                                               |       |         |         |
|---------------|-------------------------------------------------------------------------------|-------|---------|---------|
| PF3D7_0516400 | phosducin-like protein, putative (PhLP3)                                      | 0.14  | 16.62   | 16.52   |
| PF3D7_0516500 | metabolite/drug transporter, putative                                         | 1.08  | 9.17    | 17.52   |
| PF3D7_0516600 | sporozoite surface antigen MB2 (MB2)                                          | -0.13 | 20.09   | 16.59   |
| PF3D7_0516700 | ubiquitin carboxyl-terminal hydrolase 2, putative                             | -0.42 | 109.85  | 74.04   |
| PF3D7_0516800 | transcription factor with AP2 domain(s) (ApiAP2)                              | -0.02 | 32.87   | 29.30   |
| PF3D7_0516900 | 60S ribosomal protein L2 (RPL2)                                               | 0.13  | 1596.75 | 1571.95 |
| PF3D7_0517000 | 60S ribosomal protein L12, putative                                           | 0.02  | 1071.63 | 981.46  |
| PF3D7_0517100 | conserved Plasmodium protein, unknown function                                | -0.60 | 5.43    | 3.23    |
| PF3D7_0517200 | conserved Plasmodium protein, unknown function                                | -0.37 | 66.23   | 46.27   |
| PF3D7_0517300 | serine/arginine-rich splicing factor 1 (SR1)                                  | -0.11 | 1138.41 | 951.65  |
| PF3D7_0517400 | FACT complex subunit SPT16, putative (FACT-L)                                 | -0.25 | 75.37   | 57.17   |
| PF3D7_0517500 | UTP--glucose-1-phosphate uridylyltransferase, putative                        | -0.30 | 7.06    | 5.17    |
| PF3D7_0517600 | F-actin-capping protein subunit beta, putative (CPbeta)                       | -1.02 | 13.71   | 6.10    |
| PF3D7_0517700 | eukaryotic translation initiation factor 3 subunit B, putative (EIF3B)        | -0.06 | 326.25  | 282.65  |
| PF3D7_0517800 | apicortin, putative                                                           | 0.11  | 1.66    | 1.61    |
| PF3D7_0517900 | zinc finger protein, putative                                                 | 0.30  | 24.21   | 26.98   |
| PF3D7_0518000 | conserved protein, unknown function                                           | 0.59  | 32.68   | 44.36   |
| PF3D7_0518100 | RAP protein, putative                                                         | 0.51  | 6.87    | 8.81    |
| PF3D7_0518200 | SWIB/MDM2 domain-containing protein, putative                                 | 0.13  | 43.50   | 42.92   |
| PF3D7_0518300 | proteasome subunit beta type-1, putative                                      | -0.03 | 118.07  | 103.97  |
| PF3D7_0518400 | cyclin (CYC3)                                                                 | -1.03 | 2.76    | 1.20    |
| PF3D7_0518500 | ATP-dependent RNA helicase DDX23, putative (DDX23)                            | 0.38  | 60.69   | 71.32   |
| PF3D7_0518600 | WD repeat-containing protein 26, putative (WDR26)                             | 0.84  | 12.01   | 19.47   |
| PF3D7_0518700 | mRNA-binding protein PUF1 (PUF1)                                              | 0.68  | 4.37    | 6.29    |
| PF3D7_0518800 | secreted ookinete protein, putative (PSOP13)                                  | 4.06  | 0.07    | 1.62    |
| PF3D7_0518900 | conserved Plasmodium protein, unknown function                                | 1.73  | 1.26    | 3.86    |
| PF3D7_0519000 | histone RNA hairpin-binding protein, putative (SLBP)                          | 1.43  | 4.17    | 10.16   |
| PF3D7_0519100 | mitochondrial ribosomal protein L14 precursor, putative                       | 0.68  | 25.45   | 36.73   |
| PF3D7_0519200 | V-type proton ATPase 16 kDa proteolipid subunit                               | 0.28  | 269.88  | 296.39  |
| PF3D7_0519300 | cytochrome c oxidase assembly protein (heme A: farnesyltransferase), putative | 1.02  | 6.13    | 11.24   |
| PF3D7_0519400 | 40S ribosomal protein S24 (RPS24)                                             | 0.40  | 1231.70 | 1470.66 |
| PF3D7_0519500 | carbon catabolite repressor protein 4, putative (CCR4)                        | -0.36 | 20.28   | 14.23   |
| PF3D7_0519600 | zinc finger protein, putative                                                 | 0.15  | 54.28   | 54.21   |
| PF3D7_0519700 | conserved Plasmodium protein, unknown function                                | -0.44 | 427.18  | 284.59  |
| PF3D7_0519800 | conserved protein, unknown function                                           | -0.23 | 284.71  | 219.38  |
| PF3D7_0519900 | conserved Plasmodium protein, unknown function                                | -0.42 | 6.97    | 4.68    |
| PF3D7_0520000 | 40S ribosomal protein S9, putative                                            | 0.33  | 1147.10 | 1296.51 |
| PF3D7_0520100 | protein phosphatase PPM9, putative (PPM9)                                     | -0.66 | 37.22   | 21.26   |
| PF3D7_0520200 | conserved Plasmodium protein, unknown function                                | 0.17  | 20.83   | 21.18   |
| PF3D7_0520300 | U6 snRNA-associated Sm-like protein LSM2, putative (LSM2)                     | 0.10  | 32.38   | 31.22   |
| PF3D7_0520400 | conserved Plasmodium protein, unknown function                                | -0.71 | 19.98   | 11.03   |
| PF3D7_0520500 | phosphomethylpyrimidine kinase, putative                                      | -0.34 | 20.72   | 14.71   |
| PF3D7_0520600 | bis(5'-nucleosyl)-tetraphosphatase [asymmetrical]                             | -0.27 | 185.98  | 139.28  |
| PF3D7_0520700 | conserved Plasmodium protein, unknown function                                | -1.21 | 11.89   | 4.63    |
| PF3D7_0520800 | conserved Plasmodium protein, unknown function                                | -0.50 | 20.56   | 13.15   |
| PF3D7_0520900 | S-adenosyl-L-homocysteine hydrolase (SAHH)                                    | -0.17 | 479.82  | 385.64  |
| PF3D7_0521000 | conserved Plasmodium protein, unknown function                                | 0.04  | 53.75   | 49.83   |
| PF3D7_0521100 | conserved Plasmodium protein, unknown function                                | 0.64  | 0.21    | 0.29    |
| PF3D7_0521200 | conserved Plasmodium protein, unknown function                                | 0.99  | 1.48    | 2.66    |
| PF3D7_0521300 | conserved Plasmodium protein, unknown function                                | -1.05 | 28.53   | 12.45   |
| PF3D7_0521400 | conserved Plasmodium protein, unknown function                                | -0.18 | 8.66    | 6.91    |
| PF3D7_0521500 | ribosomal large subunit pseudouridylate synthase, putative                    | 0.53  | 6.20    | 8.10    |
| PF3D7_0521600 | conserved Plasmodium protein, unknown function                                | -1.20 | 17.70   | 6.89    |
| PF3D7_0521700 | DEAD/DEAH box ATP-dependent RNA helicase, putative                            | -1.53 | 19.11   | 5.98    |
| PF3D7_0521800 | nucleotide binding protein, putative                                          | 0.07  | 3.71    | 3.52    |
| PF3D7_0521900 | conserved Plasmodium protein, unknown function                                | -0.08 | 2.52    | 2.15    |
| PF3D7_0522000 | conserved Plasmodium protein, unknown function                                | 0.24  | 11.34   | 12.08   |
| PF3D7_0522100 | conserved Plasmodium protein, unknown function                                | 0.56  | 9.70    | 12.94   |
| PF3D7_0522200 | transcription initiation factor TFIID subunit 10, putative (TAF10)            | -0.41 | 37.97   | 25.72   |
| PF3D7_0522300 | S-adenosylmethionine-dependent methyltransferase, putative                    | 0.45  | 69.45   | 85.48   |
| PF3D7_0522400 | conserved Plasmodium protein, unknown function                                | 0.95  | 5.95    | 10.37   |
| PF3D7_0522500 | 50S ribosomal protein L17, apicoplast, putative (RPL17)                       | 0.98  | 9.88    | 17.56   |
| PF3D7_0522600 | inner membrane complex protein                                                | -0.59 | 27.94   | 16.70   |
| PF3D7_0522700 | iron-sulfur assembly protein, putative (SufA)                                 | 0.78  | 4.45    | 6.90    |
| PF3D7_0522800 | G10 protein, putative                                                         | 0.54  | 45.66   | 59.91   |
| PF3D7_0522900 | zinc finger protein, putative                                                 | 0.47  | 4.38    | 5.48    |
| PF3D7_0523000 | multidrug resistance protein 1 (MDR1)                                         | -1.54 | 602.34  | 186.53  |
| PF3D7_0523100 | mitochondrial processing peptidase alpha subunit, putative                    | 0.10  | 35.94   | 34.81   |
| PF3D7_0523200 | conserved Plasmodium protein, unknown function                                | -0.99 | 5.35    | 2.43    |
| PF3D7_0523300 | conserved Plasmodium protein, unknown function                                | 0.89  | 17.38   | 29.12   |
| PF3D7_0523400 | DnaI protein, putative                                                        | -0.08 | 77.50   | 65.97   |
| PF3D7_0523500 | outer arm dynein lc3, putative                                                | -1.40 | 1.31    | 0.40    |
| PF3D7_0523600 | conserved Plasmodium protein, unknown function                                | 0.78  | 9.51    | 14.73   |
| PF3D7_0523700 | conserved Plasmodium membrane protein, unknown function                       | -0.61 | 3.19    | 1.88    |
| PF3D7_0523800 | transporter, putative                                                         | -1.46 | 88.72   | 29.04   |
| PF3D7_0523900 | conserved Plasmodium membrane protein, unknown function                       | -1.30 | 90.66   | 33.12   |
| PF3D7_0524000 | karyopherin beta (KASbeta)                                                    | -0.21 | 897.51  | 699.58  |
| PF3D7_0524100 | conserved Plasmodium protein, unknown function                                | -0.47 | 44.55   | 28.92   |
| PF3D7_0524200 | conserved Plasmodium membrane protein, unknown function                       | 1.26  | 8.62    | 18.67   |
| PF3D7_0524300 | conserved Plasmodium protein, unknown function                                | 0.13  | 40.07   | 39.57   |
| PF3D7_0524400 | cytosolic preribosomal GTP-binding protein, putative                          | 0.80  | 215.65  | 339.58  |
| PF3D7_0524500 | conserved Plasmodium protein, unknown function                                | -0.87 | 30.11   | 14.86   |
| PF3D7_0524600 | 50S ribosomal protein L12, apicoplast, putative                               | 0.12  | 20.72   | 20.38   |
| PF3D7_0524700 | mitochondrial import receptor subunit TOM22, putative (TOM22)                 | -0.20 | 49.24   | 38.67   |
| PF3D7_0524800 | ubiquitin fusion degradation protein UFD1, putative                           | 0.10  | 11.63   | 11.28   |
| PF3D7_0524900 | tRNA-YW synthesizing protein, putative                                        | -0.20 | 64.01   | 50.28   |
| PF3D7_0525000 | zinc finger protein, putative                                                 | 0.98  | 9.00    | 16.08   |
| PF3D7_0525100 | acyl-CoA synthetase (ACS10)                                                   | 0.14  | 320.21  | 319.15  |
| PF3D7_0525200 | conserved Plasmodium protein, unknown function                                | -0.07 | 20.21   | 17.31   |
| PF3D7_0525300 | conserved Plasmodium protein, unknown function                                | 0.69  | 2.52    | 3.68    |
| PF3D7_0525400 | G-protein coupled receptor, putative                                          | -0.40 | 10.31   | 7.04    |
| PF3D7_0525500 | WD repeat-containing protein, putative                                        | -1.25 | 17.00   | 6.45    |
| PF3D7_0525600 | RNA methyltransferase, putative                                               | 0.32  | 7.57    | 8.51    |
| PF3D7_0525700 | conserved Plasmodium protein, unknown function                                | 0.34  | 17.08   | 19.48   |
| PF3D7_0525800 | inner membrane complex protein 1g, putative (IMC1g)                           | 1.80  | 168.63  | 528.39  |
| PF3D7_0525900 | NIMA related kinase 2 (NEK2)                                                  | 0.53  | 1.51    | 1.98    |
| PF3D7_0526000 | RAP protein, putative                                                         | -0.03 | 3.77    | 3.33    |
| PF3D7_0526100 | conserved Plasmodium membrane protein, unknown function                       | -0.63 | 2.13    | 1.24    |

|                 |                                                                          |       |         |          |
|-----------------|--------------------------------------------------------------------------|-------|---------|----------|
| PF3D7_0526200.1 | ADP-ribosylation factor GTPase-activating protein, putative (ARF-GAP)    | 0.47  | 27.22   | 33.93    |
| PF3D7_0526200.2 | ADP-ribosylation factor GTPase-activating protein, putative (ARF-GAP)    | 0.46  | 27.24   | 33.92    |
| PF3D7_0526300   | nucleolar Jumonji domain interacting protein, putative                   | -0.66 | 82.62   | 47.15    |
| PF3D7_0526400   | conserved Plasmodium protein, unknown function                           | 0.31  | 6.81    | 7.59     |
| PF3D7_0526500   | conserved Plasmodium protein, unknown function                           | -0.68 | 84.37   | 47.50    |
| PF3D7_0526600   | conserved Plasmodium protein, unknown function                           | 0.75  | 7.54    | 11.46    |
| PF3D7_0526700   | conserved Plasmodium protein, unknown function                           | -0.06 | 18.76   | 16.19    |
| PF3D7_0526800   | conserved Plasmodium protein, unknown function                           | -0.40 | 205.18  | 139.85   |
| PF3D7_0526900   | transmembrane emp24 domain-containing protein, putative                  | -0.22 | 316.86  | 246.19   |
| PF3D7_0527000   | DNA replication licensing factor MCM3, putative (MCM3)                   | 0.72  | 117.33  | 174.39   |
| PF3D7_0527100   | ubiquitin-conjugating enzyme E2 N, putative (UBC13)                      | 0.47  | 290.22  | 363.66   |
| PF3D7_0527200   | ubiquitin carboxyl-terminal hydrolase 14, putative (USP14)               | 0.04  | 118.31  | 109.68   |
| PF3D7_0527300   | methionine aminopeptidase 1a, putative (METAP1a)                         | -0.01 | 70.25   | 62.72    |
| PF3D7_0527400   | conserved Plasmodium protein, unknown function                           | -0.89 | 136.48  | 66.56    |
| PF3D7_0527500   | Hsc70-interacting protein (HIP)                                          | 0.61  | 603.34  | 829.45   |
| PF3D7_0527600   | conserved Plasmodium protein, unknown function                           | -0.03 | 42.54   | 37.54    |
| PF3D7_0527700   | tRNA Glutamic acid                                                       | 0.19  | 0.00    | 0.00     |
| PF3D7_0527800   | tRNA Leucine                                                             | 0.77  | 0.27    | 0.55     |
| PF3D7_0527900   | RNA helicase 1                                                           | 0.45  | 89.61   | 110.33   |
| PF3D7_0528000   | proteasome maturation factor UMP1, putative (UMP1)                       | -1.15 | 83.21   | 33.90    |
| PF3D7_0528100   | AP-1 complex subunit beta, putative                                      | -0.34 | 122.45  | 87.55    |
| PF3D7_0528200   | eukaryotic translation initiation factor 3 subunit E, putative (EIF3E)   | 0.02  | 320.82  | 294.37   |
| PF3D7_0528300   | conserved Plasmodium protein, unknown function                           | 0.87  | 9.95    | 16.43    |
| PF3D7_0528400   | palmitoyltransferase (DHHCT)                                             | 0.04  | 57.04   | 52.79    |
| PF3D7_0528500   | F-actin-capping protein subunit alpha, putative (CPalpha)                | 0.16  | 11.95   | 12.09    |
| PF3D7_0528600   | conserved Plasmodium protein, unknown function                           | 0.00  | 64.66   | 58.23    |
| PF3D7_0528700   | peptidyl-prolyl cis-trans isomerase (CYP23)                              | -0.57 | 158.91  | 96.80    |
| PF3D7_0528800   | nucleolar preribosomal GTPase, putative                                  | -0.84 | 52.65   | 26.44    |
| PF3D7_0528900   | conserved Plasmodium protein, unknown function                           | -0.49 | 3.95    | 2.51     |
| PF3D7_0529000   | conserved Plasmodium protein, unknown function                           | -0.91 | 112.19  | 53.97    |
| PF3D7_0529100   | conserved Plasmodium protein, unknown function                           | -0.07 | 8.20    | 7.05     |
| PF3D7_0529200   | sugar transporter, putative                                              | 0.97  | 1.70    | 3.01     |
| PF3D7_0529300   | apicoplast TIC22 protein (TIC22)                                         | 0.50  | 4.24    | 5.40     |
| PF3D7_0529400.1 | conserved Plasmodium protein, unknown function                           | 0.41  | 48.51   | 57.96    |
| PF3D7_0529400.2 | conserved Plasmodium protein, unknown function                           | 0.35  | 48.66   | 56.03    |
| PF3D7_0529500   | cell cycle regulator protein, putative                                   | -0.87 | 77.36   | 38.13    |
| PF3D7_0529600   | tRNA Arginine                                                            | -0.81 | 0.31    | 0.00     |
| PF3D7_0529700   | conserved Plasmodium protein, unknown function                           | 0.64  | 2.03    | 2.86     |
| PF3D7_0529800   | conserved Plasmodium protein, unknown function                           | 0.97  | 9.54    | 16.92    |
| PF3D7_0529900   | RING zinc finger protein, putative                                       | -0.53 | 214.64  | 134.11   |
| PF3D7_0530000   | conserved Plasmodium protein, unknown function                           | 0.70  | 66.74   | 97.92    |
| PF3D7_0530100   | SNARE protein, putative (SYN6)                                           | -0.50 | 76.55   | 48.85    |
| PF3D7_0530200   | phosphoenolpyruvate/phosphate translocator (PPT)                         | 0.15  | 24.31   | 24.32    |
| PF3D7_0530300   | conserved Plasmodium membrane protein, unknown function                  | -0.57 | 11.52   | 6.98     |
| PF3D7_0530400   | conserved Plasmodium protein, unknown function                           | 1.54  | 0.64    | 1.69     |
| PF3D7_0530500   | conserved Plasmodium membrane protein, unknown function                  | 0.45  | 0.41    | 0.50     |
| PF3D7_0530600   | XAP-5 DNA binding protein, putative                                      | -0.05 | 46.38   | 40.34    |
| PF3D7_0530700   | conserved Plasmodium protein, unknown function                           | -0.91 | 23.47   | 11.30    |
| PF3D7_0530800   | CPW-WPC family protein                                                   | 1.19  | 7.06    | 14.54    |
| PF3D7_0530900   | formin 1                                                                 | 0.27  | 10.88   | 11.82    |
| PF3D7_0531000   | conserved Plasmodium protein, unknown function                           | -1.14 | 25.67   | 10.49    |
| PF3D7_0531100   | conserved Plasmodium protein, unknown function                           | 1.05  | 3.82    | 7.14     |
| PF3D7_0531200   | mitochondrial ribosomal protein S16 precursor, putative                  | 0.58  | 4.85    | 6.56     |
| PF3D7_0531300   | conserved Plasmodium protein, unknown function                           | 0.07  | 8.43    | 7.99     |
| PF3D7_0531400   | conserved Plasmodium protein, unknown function                           | -1.20 | 17.91   | 7.02     |
| PF3D7_0531500   | unspecified product                                                      | -1.40 | 0.06    | 0.00     |
| PF3D7_0531600   | 18S ribosomal RNA                                                        | 2.32  | 938.56  | 4240.40  |
| PF3D7_0531700   | unspecified product                                                      | 2.66  | 0.50    | 3.14     |
| PF3D7_0531800   | 5.8S ribosomal RNA                                                       | 5.03  | 54.38   | 1605.73  |
| PF3D7_0531900   | unspecified product                                                      | 1.26  | 18.01   | 39.00    |
| PF3D7_0532000   | 28S ribosomal RNA                                                        | 4.22  | 1196.99 | 20185.00 |
| PF3D7_0532100   | early transcribed membrane protein 5 (ETRAMP5)                           | 0.16  | 3438.18 | 3476.90  |
| PF3D7_0532200   | Plasmodium exported protein (PHISTe), unknown function                   | -0.36 | 20.66   | 14.51    |
| PF3D7_0532300   | Plasmodium exported protein (PHISTb), unknown function                   | -0.72 | 956.27  | 523.46   |
| PF3D7_0532400   | lysine-rich membrane-associated PHISTb protein (LyMP)                    | -0.15 | 192.80  | 157.15   |
| PF3D7_0532500   | Plasmodium exported protein, unknown function                            | 1.98  | 1.65    | 6.04     |
| PF3D7_0532600   | Plasmodium exported protein, unknown function                            | 1.64  | 9.68    | 27.29    |
| PF3D7_0532700   | erythrocyte membrane protein 1 (PfEMP1), pseudogene (VAR)                | -1.40 | 1.00    | 0.33     |
| PF3D7_0532800   | stevor, pseudogene                                                       | -2.44 | 5.24    | 0.85     |
| PF3D7_0532900   | rifin (RIF)                                                              | -1.23 | 4.24    | 1.61     |
| PF3D7_0533000   | rifin, pseudogene (RIF)                                                  | -0.25 | 1.22    | 0.92     |
| PF3D7_0533100   | erythrocyte membrane protein 1 (PfEMP1), truncated, pseudogene (VAR1CSA) | -0.12 | 11.48   | 9.54     |
| PF3D7_0600100   | erythrocyte membrane protein 1 (PfEMP1), pseudogene (VAR)                | -2.13 | 0.11    | 0.00     |
| PF3D7_0600200   | erythrocyte membrane protein 1, PfEMP1 (VAR)                             | -0.63 | 0.80    | 0.47     |
| PF3D7_0600300   | rifin (RIF)                                                              | 0.26  | 0.38    | 0.41     |
| PF3D7_0600400   | erythrocyte membrane protein 1, PfEMP1 (VAR)                             | -0.54 | 1.74    | 1.08     |
| PF3D7_0600500   | rifin (RIF)                                                              | 1.21  | 0.68    | 1.44     |
| PF3D7_0600600   | erythrocyte membrane protein 1 (PfEMP1), exon 2 (VAR)                    | 3.65  | 0.00    | 0.17     |
| PF3D7_0600700   | rifin (RIF)                                                              | -1.58 | 0.34    | 0.09     |
| PF3D7_0600800   | rifin, pseudogene (RIF)                                                  | 1.57  | 0.08    | 0.26     |
| PF3D7_0600900   | rifin, pseudogene (RIF)                                                  | 0.93  | 0.33    | 0.57     |
| PF3D7_0601000   | exported protein family 4 (EPF4)                                         | -0.94 | 165.71  | 77.96    |
| PF3D7_0601100   | exported protein family 3 (EPF3)                                         | -0.48 | 90.63   | 58.66    |
| PF3D7_0601200   | Pfmc-2TM Maurer's cleft two transmembrane protein (MC-2TM)               | 2.09  | 3.02    | 11.66    |
| PF3D7_0601300   | exported protein family 1 (EPF1)                                         | -2.26 | 13.38   | 2.50     |
| PF3D7_0601400   | erythrocyte membrane protein 1 (PfEMP1), pseudogene (VAR)                | 0.02  | 1.58    | 1.44     |
| PF3D7_0601500   | Plasmodium exported protein (PHISTb), unknown function                   | 1.52  | 0.41    | 1.10     |
| PF3D7_0601600   | tetratricopeptide repeat protein, putative                               | 0.85  | 12.31   | 20.03    |
| PF3D7_0601700   | Plasmodium exported protein (PHISTa), unknown function, pseudogene       | -0.46 | 8.11    | 5.32     |
| PF3D7_0601800   | H/ACA snoRNA                                                             | 0.19  | 0.00    | 0.00     |
| PF3D7_0601900   | conserved Plasmodium protein, unknown function                           | -0.20 | 415.29  | 326.47   |
| PF3D7_0602000   | conserved Plasmodium protein, unknown function                           | -0.45 | 10.26   | 6.76     |
| PF3D7_0602100   | ATP-dependent RNA helicase, putative                                     | -0.24 | 85.77   | 65.63    |
| PF3D7_0602200   | MYND finger protein, putative                                            | -0.25 | 42.91   | 32.44    |
| PF3D7_0602300   | liver merozoite formation protein, putative (PALM)                       | -2.13 | 0.57    | 0.10     |
| PF3D7_0602400   | elongation factor G (EF-G)                                               | 0.17  | 20.06   | 20.37    |
| PF3D7_0602500   | geranylgeranyltransferase, putative                                      | 0.49  | 8.41    | 10.65    |
| PF3D7_0602600   | conserved Plasmodium protein, unknown function                           | -1.09 | 58.13   | 24.63    |

|               |                                                                          |       |        |         |
|---------------|--------------------------------------------------------------------------|-------|--------|---------|
| PF3D7_0602700 | conserved Plasmodium protein, unknown function                           | -0.44 | 3.29   | 2.19    |
| PF3D7_0602800 | MjJC domain containing protein (MjJC2)                                   | -0.80 | 10.42  | 5.41    |
| PF3D7_0602900 | conserved Plasmodium protein, unknown function                           | -1.61 | 37.36  | 11.00   |
| PF3D7_0603000 | conserved Plasmodium protein, unknown function                           | -1.28 | 31.70  | 11.79   |
| PF3D7_0603100 | conserved Plasmodium protein, unknown function                           | -0.40 | 6.07   | 4.13    |
| PF3D7_0603200 | mitochondrial chaperone BCS1, putative                                   | 1.26  | 9.41   | 20.38   |
| PF3D7_0603300 | dihydroorotate dehydrogenase (DHODH)                                     | 0.31  | 20.45  | 22.81   |
| PF3D7_0603400 | trophozoite exported protein 1 (TEX1)                                    | -0.52 | 50.81  | 31.86   |
| PF3D7_0603500 | cation/H <sup>+</sup> antiporter (CAX)                                   | 0.41  | 13.13  | 15.77   |
| PF3D7_0603600 | conserved Plasmodium protein, unknown function                           | 1.47  | 1.41   | 3.54    |
| PF3D7_0603700 | phenylalanine-tRNA ligase (mFRS)                                         | 0.54  | 3.04   | 3.99    |
| PF3D7_0603800 | centrosomal protein CEP76, putative (CEP76)                              | 0.34  | 14.61  | 16.74   |
| PF3D7_0603900 | conserved Plasmodium protein, unknown function                           | 1.31  | 1.01   | 2.29    |
| PF3D7_0604000 | conserved Plasmodium protein, unknown function                           | 1.05  | 0.81   | 1.52    |
| PF3D7_0604100 | transcription factor with AP2 domain(s) (SIP2)                           | -0.67 | 51.59  | 29.16   |
| PF3D7_0604200 | mitochondrial ribosomal protein L41, putative                            | 1.23  | 2.78   | 5.96    |
| PF3D7_0604300 | conserved Plasmodium protein, unknown function                           | 0.06  | 14.68  | 13.81   |
| PF3D7_0604400 | conserved Plasmodium protein, unknown function                           | -0.58 | 0.67   | 0.39    |
| PF3D7_0604500 | conserved Plasmodium protein, unknown function                           | -0.37 | 249.43 | 173.74  |
| PF3D7_0604600 | DNA helicase, putative                                                   | 0.95  | 1.45   | 2.53    |
| PF3D7_0604700 | glyoxalase I (GILP)                                                      | 1.07  | 16.53  | 31.26   |
| PF3D7_0604800 | RAP protein, putative                                                    | -0.08 | 0.96   | 0.82    |
| PF3D7_0604900 | conserved Plasmodium protein, unknown function                           | 1.17  | 2.72   | 5.60    |
| PF3D7_0605000 | 50S ribosomal protein L24, putative                                      | 1.34  | 4.48   | 10.27   |
| PF3D7_0605100 | RNA-binding protein, putative                                            | -0.27 | 154.66 | 115.68  |
| PF3D7_0605200 | conserved Plasmodium protein, unknown function                           | 0.99  | 12.66  | 22.77   |
| PF3D7_0605300 | serine/threonine protein kinase (ARK1)                                   | 1.50  | 9.77   | 24.98   |
| PF3D7_0605400 | calcium-binding protein, putative                                        | 0.31  | 5.43   | 6.06    |
| PF3D7_0605500 | cyclin dependent kinase binding protein, putative                        | 0.02  | 5.01   | 4.58    |
| PF3D7_0605600 | nucleoside diphosphate kinase, putative                                  | 1.55  | 1.16   | 3.08    |
| PF3D7_0605700 | conserved Plasmodium protein, unknown function                           | 1.60  | 4.93   | 13.52   |
| PF3D7_0605800 | DNA repair protein RAD50, putative (RAD50)                               | 0.04  | 15.16  | 14.03   |
| PF3D7_0605900 | long chain polyunsaturated fatty acid elongation enzyme, putative        | -0.76 | 124.95 | 66.74   |
| PF3D7_0606000 | conserved Plasmodium protein, unknown function                           | -0.85 | 292.80 | 146.24  |
| PF3D7_0606100 | RNA-binding protein, putative                                            | -0.01 | 200.47 | 179.57  |
| PF3D7_0606200 | ubiquitin-conjugating enzyme E2, putative                                | 0.17  | 64.52  | 65.40   |
| PF3D7_0606300 | conserved Plasmodium protein, unknown function                           | -3.92 | 17.73  | 1.00    |
| PF3D7_0606400 | conserved Plasmodium protein, unknown function                           | -2.23 | 0.89   | 0.12    |
| PF3D7_0606500 | polypyrimidine tract binding protein, putative                           | -0.27 | 98.09  | 73.53   |
| PF3D7_0606600 | conserved Plasmodium protein, unknown function                           | -0.89 | 157.31 | 76.48   |
| PF3D7_0606700 | coatamer alpha subunit, putative                                         | -1.19 | 158.96 | 62.83   |
| PF3D7_0606800 | probable protein, unknown function                                       | -0.22 | 37.18  | 28.84   |
| PF3D7_0606900 | glutaredoxin-like protein (GLP2)                                         | -1.22 | 71.17  | 27.60   |
| PF3D7_0607000 | translation initiation factor IF-2, putative                             | -0.05 | 436.50 | 380.41  |
| PF3D7_0607100 | MYND finger protein, putative                                            | 0.74  | 0.52   | 0.80    |
| PF3D7_0607200 | RING zinc finger protein, putative                                       | 0.72  | 5.11   | 7.57    |
| PF3D7_0607300 | uroporphyrinogen III decarboxylase (UROD)                                | 1.63  | 1.88   | 5.28    |
| PF3D7_0607400 | G-protein associated signal transduction protein, putative               | -0.96 | 21.28  | 9.86    |
| PF3D7_0607500 | para-hydroxybenzoate-polyprenyltransferase, putative (COQ2)              | -0.60 | 12.54  | 7.49    |
| PF3D7_0607600 | spindle assembly abnormal protein 6, putative (SAS6)                     | 0.26  | 19.70  | 21.29   |
| PF3D7_0607700 | conserved Plasmodium protein, unknown function                           | -0.23 | 17.37  | 13.33   |
| PF3D7_0607800 | GTP-binding protein, putative                                            | 1.13  | 2.53   | 5.03    |
| PF3D7_0607900 | conserved Plasmodium protein, unknown function                           | 0.73  | 3.97   | 5.95    |
| PF3D7_0608000 | diphthine methyltransferase, putative (DPH7)                             | 0.19  | 17.24  | 17.77   |
| PF3D7_0608100 | conserved Plasmodium protein, unknown function                           | 0.10  | 16.96  | 16.39   |
| PF3D7_0608200 | conserved Plasmodium protein, unknown function                           | -0.08 | 3.90   | 3.32    |
| PF3D7_0608300 | conserved Plasmodium protein, unknown function                           | -0.01 | 1.72   | 1.54    |
| PF3D7_0608310 | sorting assembly machinery 50 kDa subunit, putative (SAM50)              | -0.98 | 16.71  | 7.61    |
| PF3D7_0608400 | conserved Plasmodium protein, unknown function                           | 1.13  | 13.26  | 26.33   |
| PF3D7_0608500 | proteasome subunit alpha type-2, putative                                | 0.13  | 198.78 | 196.83  |
| PF3D7_0608600 | conserved Plasmodium protein, unknown function                           | 0.05  | 8.04   | 7.51    |
| PF3D7_0608700 | T-complex protein 1 subunit zeta (CCT6)                                  | -0.13 | 204.86 | 168.42  |
| PF3D7_0608800 | ornithine aminotransferase (OAT)                                         | 0.01  | 282.13 | 256.18  |
| PF3D7_0608900 | conserved Plasmodium protein, unknown function                           | -0.74 | 4.34   | 2.34    |
| PF3D7_0609000 | conserved Plasmodium protein, unknown function                           | 0.17  | 40.07  | 40.61   |
| PF3D7_0609100 | Zn <sup>2+</sup> or Fe <sup>2+</sup> permease                            | -0.34 | 133.98 | 95.69   |
| PF3D7_0609200 | citrate synthase-like protein, putative                                  | -1.64 | 9.21   | 2.65    |
| PF3D7_0609300 | conserved Plasmodium protein, unknown function                           | 0.77  | 2.55   | 3.95    |
| PF3D7_0609400 | mitochondrial cardiolipin synthase, putative (CLS)                       | 0.49  | 8.02   | 10.16   |
| PF3D7_0609500 | conserved Plasmodium protein, unknown function                           | 0.82  | 1.52   | 2.44    |
| PF3D7_0609600 | hypothetical protein                                                     | 0.22  | 0.78   | 0.82    |
| PF3D7_0609700 | conserved Plasmodium protein, unknown function                           | 0.05  | 134.83 | 126.01  |
| PF3D7_0609800 | palmitoyltransferase, putative (DHHC2)                                   | -0.71 | 45.77  | 25.21   |
| PF3D7_0609900 | conserved Plasmodium protein, unknown function                           | -0.08 | 16.69  | 14.24   |
| PF3D7_0610000 | mitochondrial ribosomal protein L19 precursor, putative                  | 1.38  | 8.68   | 20.44   |
| PF3D7_0610100 | pre-mRNA-splicing factor SLU7, putative (SLU7)                           | 0.50  | 68.89  | 87.69   |
| PF3D7_0610200 | conserved Plasmodium protein, unknown function                           | -0.10 | 40.05  | 33.79   |
| PF3D7_0610300 | unspecified product                                                      | 0.19  | 0.00   | 0.00    |
| PF3D7_0610400 | histone H3 (H3)                                                          | 4.27  | 251.30 | 4382.94 |
| PF3D7_0610500 | peptidyl-tRNA hydrolase PTRHD1, putative                                 | -0.66 | 31.55  | 17.95   |
| PF3D7_0610600 | calcium-dependent protein kinase 2 (CDPK2)                               | 0.38  | 15.34  | 17.97   |
| PF3D7_0610700 | conserved Plasmodium protein, unknown function                           | -1.51 | 47.60  | 15.00   |
| PF3D7_0610800 | transketolase (TK)                                                       | 0.09  | 343.86 | 329.16  |
| PF3D7_0610900 | transcription elongation factor SPT5, putative (SPT5)                    | -0.19 | 100.10 | 79.35   |
| PF3D7_0611000 | SNARE associated Golgi protein, putative                                 | -0.57 | 5.83   | 3.55    |
| PF3D7_0611100 | succinate dehydrogenase subunit 3, putative (SDH3)                       | -0.32 | 9.24   | 6.67    |
| PF3D7_0611200 | transcription factor with AP2 domain(s), putative (ApiAP2)               | 0.82  | 6.32   | 10.10   |
| PF3D7_0611300 | conserved Plasmodium protein, unknown function                           | 1.20  | 10.26  | 21.28   |
| PF3D7_0611400 | SWI/SNF-related matrix-associated actin-dependent regulator of chromatin | -0.58 | 31.35  | 18.97   |
| PF3D7_0611500 | conserved Plasmodium protein, unknown function                           | 1.04  | 2.34   | 4.36    |
| PF3D7_0611600 | conserved Plasmodium protein, unknown function                           | -0.30 | 36.81  | 26.92   |
| PF3D7_0611700 | 60S ribosomal protein L39 (RPL39)                                        | -2.08 | 459.19 | 98.03   |
| PF3D7_0611800 | conserved Plasmodium protein, unknown function                           | -0.18 | 35.49  | 28.24   |
| PF3D7_0611900 | lsm12, putative                                                          | 0.58  | 19.49  | 26.24   |
| PF3D7_0612000 | conserved Plasmodium protein, unknown function                           | -0.40 | 9.57   | 6.50    |
| PF3D7_0612100 | eukaryotic translation initiation factor 3 subunit L, putative (EIF3L)   | -1.22 | 174.38 | 67.72   |
| PF3D7_0612200 | leucine-rich repeat protein (LRR6)                                       | 0.94  | 24.15  | 41.94   |
| PF3D7_0612300 | conserved protein, unknown function                                      | -0.69 | 2.01   | 1.10    |

|                 |                                                                          |       |         |         |
|-----------------|--------------------------------------------------------------------------|-------|---------|---------|
| PF3D7_0612400   | conserved Plasmodium protein, unknown function                           | -0.30 | 2.93    | 2.14    |
| PF3D7_0612500   | conserved Plasmodium protein, unknown function                           | -1.37 | 17.93   | 6.23    |
| PF3D7_0612600   | PP-loop family protein, putative                                         | -0.04 | 33.73   | 29.63   |
| PF3D7_0612700   | 6-cysteine protein (P12)                                                 | -0.07 | 73.70   | 63.31   |
| PF3D7_0612800   | 6-cysteine protein (P12p)                                                | -1.35 | 22.70   | 8.01    |
| PF3D7_0612900   | nucleolar GTP-binding protein 1, putative                                | -0.49 | 233.04  | 149.49  |
| PF3D7_0613000.1 | conserved Plasmodium protein, unknown function                           | 0.49  | 11.69   | 14.85   |
| PF3D7_0613000.2 | conserved Plasmodium protein, unknown function                           | 0.53  | 11.87   | 15.48   |
| PF3D7_0613000.3 | conserved Plasmodium protein, unknown function                           | 0.52  | 12.99   | 16.77   |
| PF3D7_0613100   | conserved Plasmodium protein, unknown function                           | 0.14  | 13.04   | 12.92   |
| PF3D7_0613200   | conserved Plasmodium protein, unknown function                           | 0.47  | 3.30    | 4.15    |
| PF3D7_0613300   | rhopty protein ROP14 (ROP14)                                             | 0.39  | 22.22   | 26.21   |
| PF3D7_0613400   | apicoplast ribosomal protein L18 precursor, putative                     | 0.95  | 53.94   | 93.84   |
| PF3D7_0613500   | AP-3 complex subunit beta, putative                                      | 0.85  | 6.53    | 10.62   |
| PF3D7_0613600   | conserved Plasmodium protein, unknown function                           | 0.69  | 11.15   | 16.20   |
| PF3D7_0613700   | syntaxin binding protein, putative                                       | 0.33  | 19.21   | 21.73   |
| PF3D7_0613800   | transcription factor with AP2 domain(s) (ApiAP2)                         | 0.34  | 48.35   | 55.37   |
| PF3D7_0613900   | myosin E, putative (myoE)                                                | 1.28  | 61.80   | 135.79  |
| PF3D7_0614000   | thiamin-phosphate pyrophosphorylase, putative                            | 0.39  | 21.50   | 25.41   |
| PF3D7_0614100   | conserved Plasmodium protein, unknown function                           | -0.37 | 4.75    | 3.31    |
| PF3D7_0614200   | cytosolic Fe-S cluster assembly factor NAR1, putative (NAR1)             | -0.62 | 14.70   | 8.62    |
| PF3D7_0614300   | organic anion transporter                                                | -0.36 | 247.66  | 174.62  |
| PF3D7_0614400   | conserved protein, unknown function                                      | -1.27 | 174.71  | 65.31   |
| PF3D7_0614500   | 60S ribosomal protein L19 (RPL19)                                        | 0.27  | 1256.66 | 1363.72 |
| PF3D7_0614600   | conserved Plasmodium protein, unknown function                           | -0.33 | 0.87    | 0.62    |
| PF3D7_0614700   | conserved Plasmodium protein, unknown function                           | 0.52  | 8.95    | 11.61   |
| PF3D7_0614800   | endonuclease III homologue, putative                                     | 0.97  | 16.76   | 29.66   |
| PF3D7_0614900   | conserved Plasmodium membrane protein, unknown function                  | -0.07 | 12.73   | 10.96   |
| PF3D7_0615000   | conserved Plasmodium protein, unknown function                           | 0.02  | 49.98   | 45.69   |
| PF3D7_0615100   | enoyl-acyl carrier reductase (ENR)                                       | 1.71  | 1.83    | 5.43    |
| PF3D7_0615200   | conserved Plasmodium protein, unknown function                           | 0.05  | 1.03    | 0.95    |
| PF3D7_0615300   | GPI-anchored wall transfer protein 1, putative (GWT1)                    | -0.23 | 2.96    | 2.28    |
| PF3D7_0615400   | ribonuclease, putative                                                   | -0.21 | 82.23   | 64.11   |
| PF3D7_0615500   | cdc2-related protein kinase 5 (CRK5)                                     | 0.59  | 26.80   | 36.38   |
| PF3D7_0615600   | conserved Plasmodium protein, unknown function                           | -0.92 | 47.70   | 22.81   |
| PF3D7_0615700   | RNA and export factor binding protein, putative                          | -0.14 | 66.63   | 54.37   |
| PF3D7_0615800   | conserved Plasmodium protein, unknown function                           | 0.54  | 6.80    | 8.91    |
| PF3D7_0615900   | conserved Plasmodium protein, unknown function                           | 0.66  | 13.53   | 19.25   |
| PF3D7_0616000   | pyridoxal kinase (PDXK)                                                  | 1.00  | 8.76    | 15.82   |
| PF3D7_0616100   | conserved Plasmodium protein, unknown function                           | 0.43  | 4.04    | 4.93    |
| PF3D7_0616200   | kinetochore protein NDC80, putative (NDC80)                              | 0.90  | 20.46   | 34.35   |
| PF3D7_0616300   | conserved Plasmodium protein, unknown function                           | -0.96 | 17.26   | 8.01    |
| PF3D7_0616400   | conserved Plasmodium protein, unknown function                           | -1.37 | 6.81    | 2.37    |
| PF3D7_0616500   | TRAP-like protein (TLP)                                                  | 0.25  | 0.93    | 1.00    |
| PF3D7_0616600   | conserved Plasmodium protein, unknown function                           | 0.81  | 5.65    | 8.94    |
| PF3D7_0616700   | ras GTPase, putative                                                     | 0.37  | 5.37    | 6.28    |
| PF3D7_0616800   | malate:quinone oxidoreductase, putative (MQO)                            | 0.02  | 23.30   | 21.34   |
| PF3D7_0616900   | conserved Plasmodium protein, unknown function                           | -0.54 | 19.01   | 11.83   |
| PF3D7_0617000   | mitochondrial import receptor subunit TOM40, putative (TOM40)            | -1.30 | 69.53   | 25.53   |
| PF3D7_0617100   | AP-2 complex subunit alpha, putative                                     | -0.32 | 64.82   | 46.86   |
| PF3D7_0617200   | conserved Plasmodium protein, unknown function                           | -0.30 | 495.40  | 363.07  |
| PF3D7_0617300   | conserved Plasmodium protein, unknown function                           | -0.03 | 34.40   | 30.38   |
| PF3D7_0617400   | erythrocyte membrane protein 1, PfEMP1 (VAR)                             | -1.07 | 6.82    | 2.93    |
| PF3D7_0617500   | rifin, pseudogene (RIF)                                                  | -3.41 | 24.83   | 2.09    |
| PF3D7_0617600   | stevor                                                                   | -0.48 | 2.51    | 1.62    |
| PF3D7_0617700   | rifin (RIF)                                                              | -3.27 | 5.91    | 0.53    |
| PF3D7_0617800   | histone H2A (H2A)                                                        | 4.61  | 405.44  | 8943.73 |
| PF3D7_0617900   | histone H3 variant, putative (H3.3)                                      | 0.62  | 1054.09 | 1463.22 |
| PF3D7_0618000   | conserved Plasmodium membrane protein, unknown function                  | 0.64  | 29.29   | 41.05   |
| PF3D7_0618100   | conserved Plasmodium protein, unknown function                           | -0.67 | 7.66    | 4.33    |
| PF3D7_0618200   | conserved Plasmodium protein, unknown function                           | -0.23 | 144.96  | 111.58  |
| PF3D7_0618300   | 60S ribosomal protein L27a, putative                                     | -0.24 | 1262.35 | 965.25  |
| PF3D7_0618400   | conserved Plasmodium membrane protein, unknown function                  | 0.94  | 0.34    | 0.59    |
| PF3D7_0618500   | malate dehydrogenase (MDH)                                               | 1.04  | 20.50   | 38.16   |
| PF3D7_0618600   | rhomboid protease ROM10 (ROM10)                                          | 0.22  | 7.06    | 7.40    |
| PF3D7_0618700   | trafficking protein particle complex subunit 6A, putative                | -1.28 | 17.66   | 6.55    |
| PF3D7_0618800   | conserved Plasmodium protein, unknown function                           | 0.33  | 1.88    | 2.13    |
| PF3D7_0618900.1 | phosphatidylinositol N-acetylglucosaminyltransferase subunit GPII (GPII) | 0.08  | 6.75    | 6.43    |
| PF3D7_0618900.2 | phosphatidylinositol N-acetylglucosaminyltransferase subunit GPII (GPII) | -0.06 | 7.51    | 6.51    |
| PF3D7_0619000.1 | conserved Plasmodium protein, unknown function                           | 0.12  | 48.35   | 47.48   |
| PF3D7_0619000.2 | conserved Plasmodium protein, unknown function                           | 0.12  | 48.32   | 47.46   |
| PF3D7_0619100   | conserved Plasmodium protein, unknown function                           | -0.65 | 10.82   | 6.23    |
| PF3D7_0619200   | conserved Plasmodium protein, unknown function                           | -0.35 | 83.45   | 59.01   |
| PF3D7_0619300   | conserved Plasmodium protein, unknown function                           | 0.60  | 1.75    | 2.38    |
| PF3D7_0619400   | cell division cycle protein 48 homologue, putative                       | 0.03  | 224.22  | 205.97  |
| PF3D7_0619500   | acyl-CoA synthetase (ACS12)                                              | -1.07 | 20.18   | 8.66    |
| PF3D7_0619600   | conserved Plasmodium protein, unknown function                           | -0.71 | 2.59    | 1.43    |
| PF3D7_0619700   | conserved Plasmodium protein, unknown function                           | -0.07 | 6.80    | 5.85    |
| PF3D7_0619800   | conserved Plasmodium membrane protein, unknown function                  | -0.90 | 13.33   | 6.46    |
| PF3D7_0619900   | splicing factor 3A subunit 2, putative (SF3A2)                           | 0.25  | 43.49   | 46.75   |
| PF3D7_0620000   | conserved Plasmodium protein, unknown function                           | 2.80  | 0.59    | 3.79    |
| PF3D7_0620100   | conserved Plasmodium protein, unknown function                           | 1.30  | 5.81    | 13.01   |
| PF3D7_0620200   | conserved Plasmodium protein, unknown function                           | 0.45  | 1.13    | 1.40    |
| PF3D7_0620300   | conserved Plasmodium protein, unknown function                           | -1.08 | 4.46    | 1.90    |
| PF3D7_0620400   | merozoite surface protein 10 (MSP10)                                     | 1.27  | 12.14   | 26.40   |
| PF3D7_0620500   | cleavage stimulation factor subunit 1, putative                          | -0.69 | 60.48   | 33.88   |
| PF3D7_0620600   | conserved Plasmodium protein, unknown function                           | -1.40 | 4.00    | 1.35    |
| PF3D7_0620700   | DnaI protein, putative                                                   | 0.13  | 8.80    | 8.69    |
| PF3D7_0620800   | tRNA Alanine                                                             | 0.19  | 0.00    | 0.00    |
| PF3D7_0620900   | tRNA Leucine                                                             | 1.41  | 0.55    | 1.71    |
| PF3D7_0621000   | conserved Plasmodium protein, unknown function                           | -1.00 | 9.20    | 4.14    |
| PF3D7_0621100   | conserved Plasmodium protein, unknown function                           | 0.19  | 34.92   | 36.02   |
| PF3D7_0621200   | pyridoxine biosynthesis protein PDX1 (PDX1)                              | 0.89  | 233.89  | 390.95  |
| PF3D7_0621300   | mRNA binding Pumilio-homology domain protein, putative                   | -1.90 | 109.07  | 26.35   |
| PF3D7_0621400   | Pf77 protein (ALV7)                                                      | 0.51  | 15.98   | 20.48   |
| PF3D7_0621500   | ribonuclease P/MRP protein subunit RPP1, putative (RPP1)                 | -0.70 | 4.36    | 2.41    |
| PF3D7_0621600   | tRNA Serine                                                              | -0.13 | 1.09    | 0.84    |
| PF3D7_0621700   | conserved Plasmodium protein, unknown function                           | -0.31 | 4.76    | 3.47    |

|                 |                                                                                                    |       |         |         |
|-----------------|----------------------------------------------------------------------------------------------------|-------|---------|---------|
| PF3D7_0621800   | nascent polypeptide associated complex alpha chain, putative                                       | 0.65  | 771.84  | 1090.67 |
| PF3D7_0621900   | signal recognition particle subunit SRP68, putative (SRP68)                                        | -0.88 | 148.80  | 72.81   |
| PF3D7_0622000   | conserved Plasmodium protein, unknown function                                                     | -0.22 | 2.38    | 1.84    |
| PF3D7_0622100   | conserved Plasmodium protein, unknown function                                                     | -0.32 | 5.45    | 3.93    |
| PF3D7_0622200   | radical SAM protein, putative                                                                      | -0.60 | 141.41  | 83.95   |
| PF3D7_0622300   | vacuolar transporter chaperone, putative                                                           | 0.29  | 3.41    | 3.77    |
| PF3D7_0622400   | conserved Apicomplexan protein, unknown function                                                   | 1.49  | 5.96    | 15.23   |
| PF3D7_0622500   | RNA methyltransferase, putative                                                                    | 0.14  | 7.47    | 7.43    |
| PF3D7_0622600   | conserved Plasmodium protein, unknown function                                                     | 0.74  | 12.39   | 18.76   |
| PF3D7_0622700   | conserved Plasmodium membrane protein, unknown function                                            | -1.53 | 8.87    | 2.75    |
| PF3D7_0622800   | leucine-tRNA ligase, putative                                                                      | -1.21 | 229.33  | 89.18   |
| PF3D7_0622900   | transcription factor with AP2 domain(s), putative (ApiAP2)                                         | -0.92 | 142.68  | 67.85   |
| PF3D7_0623000   | chorismate synthase (CS)                                                                           | 0.45  | 20.76   | 25.55   |
| PF3D7_0623100   | nuclear polyadenylated RNA-binding protein NAB2, putative (NAB2)                                   | -0.14 | 248.77  | 204.19  |
| PF3D7_0623200   | ferredoxin-NADP reductase (FNR)                                                                    | -1.01 | 55.46   | 24.87   |
| PF3D7_0623300   | EGF-like membrane protein, putative                                                                | 0.53  | 19.63   | 25.62   |
| PF3D7_0623400   | RNA-binding protein mei2 homologue, putative                                                       | 0.02  | 1.45    | 1.33    |
| PF3D7_0623500   | superoxide dismutase [Fe] (SOD2)                                                                   | 0.01  | 36.52   | 33.27   |
| PF3D7_0623600   | transcription or splicing factor-like protein, putative                                            | 0.23  | 93.96   | 99.67   |
| PF3D7_0623700   | ATP dependent DEAD-box helicase, putative                                                          | 0.30  | 5.19    | 5.78    |
| PF3D7_0623800   | tyrosine kinase-like protein, putative (TKL4)                                                      | -0.80 | 352.28  | 182.22  |
| PF3D7_0623900   | ribonuclease H2 subunit A, putative                                                                | 0.91  | 16.02   | 27.25   |
| PF3D7_0624000   | hexokinase (HK)                                                                                    | -0.41 | 398.55  | 270.08  |
| PF3D7_0624100   | conserved Plasmodium protein, unknown function                                                     | 0.29  | 11.16   | 12.34   |
| PF3D7_0624200   | conserved Plasmodium protein, unknown function                                                     | 0.38  | 16.33   | 19.12   |
| PF3D7_0624300   | conserved Plasmodium protein, unknown function                                                     | 0.77  | 2.57    | 3.96    |
| PF3D7_0624400   | conserved Plasmodium protein, unknown function                                                     | -0.38 | 13.20   | 9.13    |
| PF3D7_0624500   | anaphase promoting complex subunit, putative                                                       | 0.49  | 56.08   | 70.97   |
| PF3D7_0624600   | SNF2 helicase, putative (ISW1)                                                                     | -0.08 | 300.81  | 256.99  |
| PF3D7_0624700   | N-acetylglucosaminylphosphatidylinositol deacetylase, putative                                     | 0.54  | 5.75    | 7.55    |
| PF3D7_0624800   | conserved Plasmodium protein, unknown function                                                     | 0.78  | 1.10    | 1.71    |
| PF3D7_0624900   | conserved Plasmodium protein, unknown function                                                     | 1.03  | 1.57    | 2.91    |
| PF3D7_0625000.1 | sphingomyelin synthase 1, putative (SMS1)                                                          | 0.99  | 9.16    | 16.49   |
| PF3D7_0625000.2 | sphingomyelin synthase 1, putative (SMS1)                                                          | 0.92  | 9.45    | 16.15   |
| PF3D7_0625100   | sphingomyelin synthase 2, putative (SMS2)                                                          | 0.53  | 1.05    | 1.36    |
| PF3D7_0625200   | conserved Plasmodium protein, unknown function                                                     | 1.34  | 1.93    | 4.43    |
| PF3D7_0625300   | DNA polymerase 1, putative                                                                         | 0.31  | 9.49    | 10.60   |
| PF3D7_0625400   | conserved Plasmodium protein, unknown function                                                     | -2.11 | 157.67  | 33.05   |
| PF3D7_0625500   | conserved Plasmodium membrane protein, unknown function                                            | -2.11 | 6.63    | 1.36    |
| PF3D7_0625600   | poly(A) polymerase PAP, putative                                                                   | -2.87 | 85.14   | 10.52   |
| PF3D7_0625700   | conserved Plasmodium protein, unknown function                                                     | 0.71  | 15.99   | 23.57   |
| PF3D7_0625800   | conserved Plasmodium protein, unknown function                                                     | -0.94 | 9.30    | 4.38    |
| PF3D7_0625900   | conserved Plasmodium protein, unknown function                                                     | 1.51  | 0.62    | 1.62    |
| PF3D7_0626000   | conserved Plasmodium protein, unknown function                                                     | -1.47 | 30.89   | 10.04   |
| PF3D7_0626100   | oxidoreductase, short-chain dehydrogenase family, putative                                         | 0.27  | 10.50   | 11.42   |
| PF3D7_0626200   | conserved Plasmodium protein, unknown function                                                     | -1.37 | 13.44   | 4.69    |
| PF3D7_0626300   | 3-oxoacyl-acyl-carrier protein synthase I/II (FabB/FabF)                                           | 0.95  | 5.50    | 9.62    |
| PF3D7_0626400   | Sec14 domain containing protein                                                                    | 0.22  | 9.06    | 9.52    |
| PF3D7_0626500   | conserved Plasmodium protein, unknown function                                                     | 0.72  | 0.76    | 1.14    |
| PF3D7_0626600   | conserved Plasmodium protein, unknown function                                                     | -1.42 | 6.49    | 2.16    |
| PF3D7_0626700   | conserved protein, unknown function                                                                | 0.12  | 131.54  | 128.61  |
| PF3D7_0626800   | pyruvate kinase (PyrK)                                                                             | 0.28  | 1309.30 | 1431.33 |
| PF3D7_0626840   | small nucleolar RNA snoR35                                                                         | 0.53  | 16.92   | 22.12   |
| PF3D7_0626900   | mitochondrial ribosomal protein L46 precursor, putative                                            | -0.27 | 6.39    | 4.77    |
| PF3D7_0627000   | conserved Plasmodium protein, unknown function                                                     | 1.09  | 1.48    | 2.90    |
| PF3D7_0627100   | ankyrin-repeat protein, putative                                                                   | -0.77 | 187.22  | 98.75   |
| PF3D7_0627200   | myosin light chain, putative                                                                       | 0.09  | 4.80    | 4.61    |
| PF3D7_0627300   | E3 ubiquitin-protein ligase RNF5, putative (RNF5)                                                  | -0.05 | 260.23  | 243.73  |
| PF3D7_0627400   | mitochondrial import inner membrane translocase subunit TIM22, putative (TIM22)                    | -0.74 | 10.58   | 5.70    |
| PF3D7_0627500   | protein DJ-1 (DJ1)                                                                                 | 0.16  | 404.73  | 408.40  |
| PF3D7_0627600   | conserved Plasmodium protein, unknown function                                                     | -0.18 | 8.22    | 6.55    |
| PF3D7_0627700   | transportin                                                                                        | -0.99 | 213.51  | 96.87   |
| PF3D7_0627800   | acetyl-CoA synthetase, putative (ACS)                                                              | -0.61 | 85.03   | 50.43   |
| PF3D7_0627900   | ribonuclease P protein subunit p29, putative (POP4)                                                | -0.50 | 52.91   | 33.76   |
| PF3D7_0628000   | 6-pyruvoyltetrahydropterin synthase (PTPS)                                                         | 0.26  | 8.11    | 8.78    |
| PF3D7_0628100   | HECT-domain (ubiquitin-transferase), putative                                                      | 1.08  | 16.37   | 31.25   |
| PF3D7_0628200   | protein kinase PK4 (PK4)                                                                           | -0.63 | 166.72  | 96.94   |
| PF3D7_0628300   | choline/ethanolaminophosphotransferase, putative (CEPT)                                            | 0.22  | 166.99  | 175.45  |
| PF3D7_0628400   | conserved Plasmodium membrane protein, unknown function                                            | 0.24  | 3.95    | 4.22    |
| PF3D7_0628500   | conserved Plasmodium protein, unknown function                                                     | -1.28 | 4.55    | 1.67    |
| PF3D7_0628600   | conserved Plasmodium protein, unknown function                                                     | -0.93 | 63.79   | 30.11   |
| PF3D7_0628700   | conserved Plasmodium protein, unknown function                                                     | -0.15 | 5.33    | 4.35    |
| PF3D7_0628800   | glutamyl-tRNA(Gln) amidotransferase subunit B, putative (GATB)                                     | 0.88  | 4.61    | 7.64    |
| PF3D7_0628900   | RAP protein, putative                                                                              | 0.72  | 1.40    | 2.08    |
| PF3D7_0629000   | conserved protein, unknown function                                                                | -1.69 | 0.54    | 0.13    |
| PF3D7_0629100   | nicotinate phosphoribosyltransferase, putative (NAPRT)                                             | -0.32 | 43.58   | 31.57   |
| PF3D7_0629200   | DnaJ protein, putative                                                                             | -0.21 | 127.70  | 99.39   |
| PF3D7_0629300   | phospholipase, putative (PL)                                                                       | 1.76  | 4.74    | 14.52   |
| PF3D7_0629400   | RNA-binding protein, putative                                                                      | 0.74  | 14.83   | 22.41   |
| PF3D7_0629500   | amino acid transporter, putative                                                                   | -0.87 | 84.25   | 41.57   |
| PF3D7_0629600   | conserved Plasmodium protein, unknown function                                                     | -0.92 | 44.45   | 21.20   |
| PF3D7_0629700   | SET domain protein, putative (SET1)                                                                | -0.26 | 34.87   | 26.34   |
| PF3D7_0629800   | cullin-like protein, putative                                                                      | -0.79 | 70.17   | 36.67   |
| PF3D7_0629900   | sec14-like cytosolic factor or phosphatidylinositol/phosphatidylcholine transfer protein, putative | -0.33 | 152.69  | 109.27  |
| PF3D7_0630000   | CPW-WPC family protein                                                                             | 2.34  | 0.16    | 0.82    |
| PF3D7_0630100   | conserved Plasmodium protein, unknown function                                                     | -0.67 | 2.69    | 1.52    |
| PF3D7_0630200   | secreted ookinete protein, putative (PSOP6)                                                        | 0.91  | 1.37    | 2.37    |
| PF3D7_0630300   | DNA polymerase epsilon, catalytic subunit a, putative                                              | 0.61  | 5.09    | 7.00    |
| PF3D7_0630400   | conserved Plasmodium protein, unknown function                                                     | -1.33 | 13.23   | 4.72    |
| PF3D7_0630500   | ribosome biogenesis protein YTM1, putative (YTM1)                                                  | -1.02 | 30.23   | 13.40   |
| PF3D7_0630600   | conserved Plasmodium protein, unknown function                                                     | -0.50 | 36.15   | 23.01   |
| PF3D7_0630700   | bifunctional methylenetetrahydrofolate dehydrogenase/cyclohydrolase, putative                      | -1.71 | 6.57    | 1.81    |
| PF3D7_0630800   | conserved Plasmodium protein, unknown function                                                     | 1.12  | 1.07    | 2.12    |
| PF3D7_0630900   | ATP-dependent RNA helicase HAS1 (HAS1)                                                             | -0.60 | 94.58   | 56.38   |
| PF3D7_0631000   | tetrapeptide repeat protein, putative                                                              | 0.36  | 20.52   | 23.70   |
| PF3D7_0631100   | Plasmodium exported protein (PHISTb), unknown function                                             | 1.21  | 0.53    | 1.12    |
| PF3D7_0631200   | erythrocyte membrane protein 1 (PfEMP1), pseudogene (VAR)                                          | -0.47 | 1.96    | 1.27    |
| PF3D7_0631300   | exported protein family 1 (EPF1)                                                                   | -1.79 | 10.87   | 2.82    |

|               |                                                                    |       |         |        |
|---------------|--------------------------------------------------------------------|-------|---------|--------|
| PF3D7_0631400 | Pfmc-2TM Maurer's cleft two transmembrane protein (MC-2TM)         | 2.06  | 1.51    | 5.79   |
| PF3D7_0631500 | exported protein family 3 (EPF3)                                   | -0.35 | 46.61   | 33.07  |
| PF3D7_0631600 | exported protein family 4 (EPF4)                                   | -0.52 | 122.19  | 76.89  |
| PF3D7_0631700 | rifin, pseudogene                                                  | 0.79  | 0.50    | 0.79   |
| PF3D7_0631800 | rifin (RIF)                                                        | 2.51  | 0.00    | 0.09   |
| PF3D7_0631900 | stevor                                                             | 2.93  | 0.12    | 0.98   |
| PF3D7_0632000 | rifin (RIF)                                                        | 0.19  | 0.00    | 0.00   |
| PF3D7_0632100 | rifin (RIF)                                                        | -0.03 | 0.14    | 0.12   |
| PF3D7_0632200 | rifin (RIF)                                                        | 1.06  | 0.10    | 0.20   |
| PF3D7_0632300 | rifin (RIF)                                                        | 0.19  | 0.23    | 0.23   |
| PF3D7_0632400 | rifin (RIF)                                                        | 0.23  | 1.34    | 1.42   |
| PF3D7_0632500 | erythrocyte membrane protein 1, PfEMP1 (VAR)                       | 0.59  | 2.41    | 3.26   |
| PF3D7_0632600 | rifin, pseudogene (RIF)                                            | -0.20 | 0.79    | 0.61   |
| PF3D7_0632700 | rifin (RIF)                                                        | 0.97  | 4.36    | 7.70   |
| PF3D7_0632800 | erythrocyte membrane protein 1, PfEMP1 (VAR)                       | 1.35  | 3.66    | 8.45   |
| PF3D7_0700100 | erythrocyte membrane protein 1, PfEMP1 (VAR)                       | 0.40  | 0.44    | 0.52   |
| PF3D7_0700200 | rifin (RIF)                                                        | 3.94  | 0.02    | 0.62   |
| PF3D7_0700300 | rifin (RIF)                                                        | 0.19  | 0.00    | 0.00   |
| PF3D7_0700400 | stevor                                                             | 2.51  | 0.00    | 0.10   |
| PF3D7_0700500 | rifin (RIF)                                                        | 2.94  | 0.06    | 0.56   |
| PF3D7_0700600 | Plasmodium exported protein, unknown function, pseudogene          | 1.77  | 0.00    | 0.05   |
| PF3D7_0700700 | stevor, pseudogene                                                 | 3.77  | 0.00    | 0.29   |
| PF3D7_0700800 | Pfmc-2TM Maurer's cleft two transmembrane protein (MC-2TM)         | 5.08  | 0.26    | 8.83   |
| PF3D7_0700900 | RESA-like protein, pseudogene                                      | -1.23 | 0.15    | 0.04   |
| PF3D7_0701000 | erythrocyte membrane protein 1 (PfEMP1), pseudogene                | 2.25  | 0.42    | 1.84   |
| PF3D7_0701100 | rifin (RIF)                                                        | -1.81 | 8.73    | 2.23   |
| PF3D7_0701200 | rifin, pseudogene (RIF)                                            | 4.71  | 0.00    | 0.55   |
| PF3D7_0701300 | rifin, pseudogene (RIF)                                            | 0.53  | 0.60    | 0.79   |
| PF3D7_0701400 | exported protein family 4, pseudogene (EPF4)                       | -0.98 | 137.95  | 63.03  |
| PF3D7_0701500 | exported protein family 3 (EPF3)                                   | -0.47 | 91.31   | 59.32  |
| PF3D7_0701600 | Pfmc-2TM Maurer's cleft two transmembrane protein (MC-2TM)         | 2.84  | 0.82    | 5.50   |
| PF3D7_0701700 | exported protein family 1 (EPF1)                                   | -3.15 | 12.22   | 1.22   |
| PF3D7_0701800 | rifin (RIF)                                                        | 0.36  | 0.16    | 0.18   |
| PF3D7_0701900 | Plasmodium exported protein, unknown function                      | 0.93  | 119.41  | 204.78 |
| PF3D7_0702000 | Plasmodium exported protein (hyp12), unknown function              | 0.35  | 437.28  | 504.41 |
| PF3D7_0702100 | Plasmodium exported protein (PHISTb), unknown function, pseudogene | -0.10 | 76.47   | 64.18  |
| PF3D7_0702200 | lysophospholipase, putative                                        | -0.62 | 120.89  | 70.81  |
| PF3D7_0702300 | sporozoite threonine and asparagine-rich protein (STARP)           | -1.50 | 469.83  | 150.37 |
| PF3D7_0702400 | small exported membrane protein 1 (SEMP1)                          | -1.52 | 1048.39 | 329.66 |
| PF3D7_0702500 | Plasmodium exported protein, unknown function                      | -1.32 | 734.51  | 264.94 |
| PF3D7_0702600 | chitinase precursor fragment, truncated                            | 1.64  | 3.65    | 10.38  |
| PF3D7_0702700 | tRNA Alanine                                                       | 0.19  | 0.00    | 0.00   |
| PF3D7_0702800 | tRNA Tyrosine                                                      | -1.40 | 0.53    | 0.00   |
| PF3D7_0702900 | centrin, putative                                                  | -0.54 | 20.74   | 12.87  |
| PF3D7_0703000 | conserved Plasmodium protein, unknown function                     | -0.90 | 4.90    | 2.36   |
| PF3D7_0703100 | conserved Plasmodium protein, unknown function                     | -1.86 | 15.35   | 3.77   |
| PF3D7_0703200 | conserved Plasmodium protein, unknown function                     | -0.24 | 22.44   | 17.18  |
| PF3D7_0703300 | conserved Plasmodium protein, unknown function                     | 0.81  | 17.17   | 27.10  |
| PF3D7_0703400 | conserved Plasmodium protein, unknown function                     | -0.24 | 5.57    | 4.25   |
| PF3D7_0703500 | erythrocyte membrane-associated antigen                            | -0.64 | 323.75  | 187.19 |
| PF3D7_0703600 | conserved Plasmodium protein, unknown function                     | 0.74  | 32.59   | 49.12  |
| PF3D7_0703700 | conserved Plasmodium protein, unknown function                     | -1.24 | 185.44  | 70.59  |
| PF3D7_0703800 | conserved Plasmodium protein, unknown function                     | 0.37  | 4.67    | 5.45   |
| PF3D7_0703900 | conserved Plasmodium membrane protein, unknown function            | -1.63 | 50.34   | 14.72  |
| PF3D7_0704000 | conserved Plasmodium membrane protein, unknown function            | -1.05 | 12.23   | 5.34   |
| PF3D7_0704100 | conserved Plasmodium membrane protein, unknown function            | -0.15 | 16.85   | 13.71  |
| PF3D7_0704200 | tRNA m5C-methyltransferase, putative                               | -1.24 | 35.74   | 13.62  |
| PF3D7_0704300 | conserved Plasmodium membrane protein, unknown function            | 0.67  | 30.87   | 44.36  |
| PF3D7_0704400 | phosphoinositide-binding protein, putative                         | -0.35 | 22.76   | 16.14  |
| PF3D7_0704500 | serine/threonine protein kinase, putative                          | -1.34 | 26.47   | 9.41   |
| PF3D7_0704600 | E3 ubiquitin-protein ligase (UT)                                   | -0.07 | 120.47  | 103.63 |
| PF3D7_0704700 | phosphopantetheine adenylyltransferase, putative (PPAT)            | -1.38 | 12.62   | 4.38   |
| PF3D7_0704800 | conserved Plasmodium protein, unknown function                     | 0.19  | 8.64    | 8.92   |
| PF3D7_0704900 | peptide chain release factor, putative                             | 0.28  | 12.19   | 13.32  |
| PF3D7_0705000 | methyltransferase, putative                                        | -0.63 | 84.52   | 49.43  |
| PF3D7_0705100 | conserved Plasmodium protein, unknown function                     | -0.33 | 13.83   | 9.95   |
| PF3D7_0705200 | conserved Plasmodium protein, unknown function                     | -0.15 | 0.93    | 0.76   |
| PF3D7_0705300 | origin recognition complex subunit 2, putative (ORC2)              | 0.45  | 14.72   | 18.13  |
| PF3D7_0705400 | DNA replication licensing factor MCM7 (MCM7)                       | 0.72  | 48.50   | 71.95  |
| PF3D7_0705500 | inositol-phosphate phosphatase, putative                           | -0.82 | 266.70  | 136.42 |
| PF3D7_0705600 | RNA helicase, putative                                             | 0.22  | 6.31    | 6.63   |
| PF3D7_0705700 | 40S ribosomal protein S29, putative                                | -0.67 | 213.00  | 120.31 |
| PF3D7_0705800 | cysteine-rich secretory protein, putative                          | 0.75  | 2.69    | 4.12   |
| PF3D7_0705900 | ATP synthase subunit C, putative                                   | 0.69  | 39.03   | 56.82  |
| PF3D7_0706000 | importin-7, putative                                               | -0.88 | 141.05  | 69.38  |
| PF3D7_0706100 | conserved Plasmodium protein, unknown function                     | -0.46 | 7.63    | 5.00   |
| PF3D7_0706200 | conserved Plasmodium protein, unknown function                     | -0.85 | 4.02    | 1.97   |
| PF3D7_0706300 | conserved Plasmodium protein, unknown function                     | 0.88  | 27.86   | 46.19  |
| PF3D7_0706400 | 60S ribosomal protein L37 (RPL37)                                  | -0.47 | 568.98  | 369.55 |
| PF3D7_0706500 | conserved Plasmodium protein, unknown function                     | -0.94 | 273.42  | 128.36 |
| PF3D7_0706600 | conserved Plasmodium protein, unknown function                     | 0.11  | 0.63    | 0.61   |
| PF3D7_0706700 | DNA mismatch repair protein MSH2, putative (MSH2-2)                | 0.35  | 1.82    | 2.09   |
| PF3D7_0706800 | tRNA Threonine                                                     | -1.81 | 4.60    | 0.95   |
| PF3D7_0706900 | tRNA Histidine                                                     | 0.19  | 0.31    | 0.32   |
| PF3D7_0707000 | tRNA Lysine                                                        | -0.81 | 0.92    | 0.32   |
| PF3D7_0707100 | tRNA Lysine                                                        | 0.19  | 0.00    | 0.00   |
| PF3D7_0707200 | conserved Plasmodium protein, unknown function                     | -0.07 | 9.69    | 8.32   |
| PF3D7_0707300 | rho-try-associated membrane antigen (RAMA)                         | 0.70  | 505.61  | 738.91 |
| PF3D7_0707400 | AAA family ATPase, putative                                        | 0.32  | 25.83   | 29.02  |
| PF3D7_0707420 | nucleolar RNA snoR36                                               | -0.47 | 11.14   | 7.21   |
| PF3D7_0707500 | conserved Plasmodium protein, unknown function                     | -1.64 | 19.12   | 5.53   |
| PF3D7_0707600 | conserved Plasmodium protein, unknown function                     | -1.15 | 42.64   | 17.26  |
| PF3D7_0707700 | E3 ubiquitin-protein ligase, putative                              | -0.58 | 124.53  | 75.41  |
| PF3D7_0707800 | RAP protein, putative                                              | 0.29  | 7.91    | 8.74   |
| PF3D7_0707900 | ribosomal protein S8e, putative                                    | 0.28  | 185.06  | 203.23 |
| PF3D7_0708000 | cytoskeleton associated protein, putative                          | 0.94  | 6.78    | 11.77  |
| PF3D7_0708100 | DNA-directed RNA polymerase 2 8.2 kDa polypeptide, putative        | -0.88 | 125.87  | 61.74  |
| PF3D7_0708200 | conserved Plasmodium protein, unknown function                     | -0.85 | 1.86    | 0.92   |

|               |                                                                        |       |         |         |
|---------------|------------------------------------------------------------------------|-------|---------|---------|
| PF3D7_0708300 | EKC/KEOPS complex subunit BUD32 (BUD32)                                | -0.11 | 37.46   | 31.24   |
| PF3D7_0708400 | heat shock protein 90 (HSP90)                                          | 0.78  | 1484.50 | 2302.40 |
| PF3D7_0708500 | heat shock protein 86 family protein                                   | 0.88  | 32.47   | 54.02   |
| PF3D7_0708600 | inner membrane complex protein 1d, putative (IMC1d)                    | -0.09 | 2.30    | 1.94    |
| PF3D7_0708700 | Cg8 protein                                                            | 0.37  | 63.58   | 74.29   |
| PF3D7_0708800 | heat shock protein 110 (HSP110c)                                       | 0.08  | 527.55  | 501.82  |
| PF3D7_0708900 | Cg3 protein                                                            | -1.16 | 58.93   | 23.78   |
| PF3D7_0709000 | chloroquine resistance transporter (CRT)                               | -1.35 | 227.41  | 80.23   |
| PF3D7_0709050 | small nucleolar RNA                                                    | 1.04  | 0.14    | 0.29    |
| PF3D7_0709100 | Cg1 protein                                                            | 0.57  | 20.52   | 27.41   |
| PF3D7_0709200 | glutaredoxin-like protein (GLP3)                                       | -0.69 | 18.00   | 10.04   |
| PF3D7_0709300 | Cg2 protein (CG2)                                                      | -1.92 | 48.54   | 11.54   |
| PF3D7_0709400 | Cg7 protein                                                            | 0.15  | 8.29    | 8.33    |
| PF3D7_0709500 | conserved Plasmodium protein, unknown function                         | 0.01  | 10.54   | 9.54    |
| PF3D7_0709600 | ribonucleases P/MRP protein subunit POP1, putative (POP1)              | -0.56 | 45.42   | 27.80   |
| PF3D7_0709700 | lysophospholipase, putative                                            | -0.52 | 57.16   | 35.89   |
| PF3D7_0709800 | conserved protein, unknown function                                    | 0.23  | 15.51   | 16.42   |
| PF3D7_0709900 | conserved Plasmodium membrane protein, unknown function                | 1.42  | 2.71    | 6.54    |
| PF3D7_0710000 | conserved Plasmodium protein, unknown function                         | -0.04 | 8.45    | 7.44    |
| PF3D7_0710100 | conserved Plasmodium protein, unknown function                         | -1.27 | 39.15   | 14.60   |
| PF3D7_0710200 | conserved Plasmodium protein, unknown function                         | 0.83  | 12.36   | 19.82   |
| PF3D7_0710300 | conserved Plasmodium membrane protein, unknown function                | 0.58  | 14.79   | 20.02   |
| PF3D7_0710400 | DNA repair protein RAD14, putative (RAD14)                             | -0.89 | 12.59   | 6.12    |
| PF3D7_0710500 | conserved Plasmodium protein, unknown function                         | 1.15  | 2.97    | 6.00    |
| PF3D7_0710600 | 60S ribosomal protein L34 (RPL34)                                      | 0.52  | 564.19  | 728.78  |
| PF3D7_0710700 | conserved Plasmodium protein, unknown function                         | -0.31 | 113.44  | 82.62   |
| PF3D7_0710800 | conserved Plasmodium protein, unknown function                         | -0.78 | 38.86   | 20.36   |
| PF3D7_0710900 | 50S ribosomal protein L1, mitochondrial, putative (RPL1)               | -0.72 | 41.85   | 22.99   |
| PF3D7_0711000 | AAA family ATPase, CDC48 subfamily (Cdc48)                             | 0.24  | 21.05   | 22.37   |
| PF3D7_0711100 | conserved Plasmodium membrane protein, unknown function                | -2.96 | 61.96   | 7.16    |
| PF3D7_0711200 | conserved Plasmodium protein, unknown function                         | -0.36 | 5.52    | 3.87    |
| PF3D7_0711300 | conserved Plasmodium protein, unknown function                         | -1.40 | 37.46   | 12.79   |
| PF3D7_0711400 | histone deacetylase complex subunit SAPI8, putative (SAPI8)            | 0.97  | 7.74    | 13.70   |
| PF3D7_0711500 | regulator of chromosome condensation, putative                         | -0.87 | 102.45  | 50.58   |
| PF3D7_0711600 | Plasmodium RNA of unknown function RUF6-1                              | -1.40 | 1.32    | 0.34    |
| PF3D7_0711700 | erythrocyte membrane protein 1, PfEMP1 (VAR)                           | 0.34  | 4.12    | 4.71    |
| PF3D7_0711800 | Plasmodium RNA of unknown function RUF6-2                              | 1.77  | 0.00    | 0.32    |
| PF3D7_0711900 | rifin, pseudogene (RIF)                                                | 3.00  | 0.00    | 0.13    |
| PF3D7_0712000 | erythrocyte membrane protein 1, PfEMP1 (VAR)                           | -0.24 | 2.93    | 2.24    |
| PF3D7_0712100 | Plasmodium RNA of unknown function RUF6-12                             | 1.19  | 0.00    | 0.16    |
| PF3D7_0712200 | rifin, pseudogene (RIF)                                                | 0.77  | 0.02    | 0.05    |
| PF3D7_0712300 | erythrocyte membrane protein 1, PfEMP1 (VAR)                           | 0.56  | 1.27    | 1.69    |
| PF3D7_0712400 | erythrocyte membrane protein 1, PfEMP1 (VAR)                           | -0.11 | 1.70    | 1.42    |
| PF3D7_0712500 | rifin, pseudogene (RIF)                                                | 1.77  | 0.00    | 0.04    |
| PF3D7_0712600 | erythrocyte membrane protein 1, PfEMP1 (VAR)                           | -1.57 | 3.08    | 0.93    |
| PF3D7_0712700 | Plasmodium RNA of unknown function RUF6-13                             | -0.81 | 0.17    | 0.00    |
| PF3D7_0712800 | erythrocyte membrane protein 1, PfEMP1 (VAR)                           | -0.53 | 0.98    | 0.61    |
| PF3D7_0712900 | erythrocyte membrane protein 1, PfEMP1 (VAR)                           | 0.28  | 2.08    | 2.28    |
| PF3D7_0713000 | rifin (RIF)                                                            | 1.68  | 0.22    | 0.66    |
| PF3D7_0713100 | Pfmc-2TM Maurer's cleft two transmembrane protein (MC-2TM)             | 1.64  | 3.35    | 9.50    |
| PF3D7_0713200 | RESA-like protein                                                      | -4.43 | 16.26   | 0.65    |
| PF3D7_0713300 | erythrocyte membrane protein 1 (PfEMP1), pseudogene (VAR)              | -1.88 | 28.77   | 7.06    |
| PF3D7_0713400 | serpentine receptor, putative (SR25)                                   | -0.26 | 67.32   | 50.88   |
| PF3D7_0713500 | conserved Plasmodium protein, unknown function                         | -1.22 | 13.74   | 5.31    |
| PF3D7_0713600 | mitochondrial ribosomal protein S5 precursor, putative                 | -0.34 | 6.45    | 4.58    |
| PF3D7_0713700 | conserved Plasmodium protein, unknown function                         | -0.27 | 68.62   | 51.32   |
| PF3D7_0713800 | negative elongation factor A, putative (NELFA)                         | 0.07  | 20.39   | 19.30   |
| PF3D7_0713900 | conserved Plasmodium protein, unknown function                         | -1.12 | 92.40   | 38.36   |
| PF3D7_0714000 | histone H2B variant (H2B.Z)                                            | 0.14  | 1196.76 | 1191.68 |
| PF3D7_0714100 | conserved Plasmodium protein, unknown function                         | -0.65 | 0.63    | 0.36    |
| PF3D7_0714200 | conserved Plasmodium protein, unknown function                         | -0.72 | 74.05   | 40.69   |
| PF3D7_0714300 | palmitoyltransferase, putative (DHH4)                                  | -0.10 | 22.96   | 19.31   |
| PF3D7_0714400 | calmodulin, putative                                                   | -0.26 | 6.07    | 4.57    |
| PF3D7_0714500 | transcription elongation factor s-II, putative                         | -0.79 | 53.45   | 27.86   |
| PF3D7_0714600 | conserved Plasmodium protein, unknown function                         | -0.02 | 44.48   | 39.66   |
| PF3D7_0714700 | tRNA Asparagine                                                        | 0.19  | 0.00    | 0.00    |
| PF3D7_0714800 | tRNA Leucine                                                           | 0.19  | 0.28    | 0.29    |
| PF3D7_0714900 | tRNA Serine                                                            | 3.00  | 0.00    | 1.69    |
| PF3D7_0715000 | 4-nitrophenylphosphatase (PNPase)                                      | -0.86 | 82.78   | 41.05   |
| PF3D7_0715100 | C-Myc-binding protein, putative (MYCBP)                                | 2.58  | 0.75    | 4.37    |
| PF3D7_0715200 | conserved Plasmodium protein, unknown function                         | 0.21  | 17.16   | 17.89   |
| PF3D7_0715300 | calcium/calmodulin-dependent protein kinase, putative                  | -0.05 | 6.82    | 5.94    |
| PF3D7_0715400 | secreted ookinete protein, putative (PSOP20)                           | 0.24  | 6.35    | 6.77    |
| PF3D7_0715500 | mitochondrial ATP synthase F1, epsilon subunit, putative               | 1.07  | 8.50    | 16.21   |
| PF3D7_0715600 | GTP-binding translation elongation factor tu family protein, putative  | 1.00  | 10.56   | 19.06   |
| PF3D7_0715700 | conserved Plasmodium protein, unknown function                         | 0.96  | 3.80    | 6.72    |
| PF3D7_0715800 | drug/metabolite exporter, drug/metabolite transporter                  | -0.68 | 20.39   | 11.44   |
| PF3D7_0715900 | zinc transporter, putative                                             | 0.04  | 29.49   | 27.30   |
| PF3D7_0716000 | RNA-binding protein, putative                                          | 0.18  | 116.03  | 118.89  |
| PF3D7_0716100 | protein SDA1, putative (SDA1)                                          | -0.57 | 58.20   | 35.28   |
| PF3D7_0716200 | conserved Plasmodium protein, unknown function                         | -1.38 | 342.77  | 119.04  |
| PF3D7_0716300 | conserved Plasmodium protein, unknown function                         | -0.70 | 264.01  | 146.86  |
| PF3D7_0716400 | transcription initiation factor IIA subunit 1, putative                | 0.63  | 50.26   | 70.14   |
| PF3D7_0716500 | conserved Plasmodium protein, unknown function                         | 0.72  | 6.15    | 9.15    |
| PF3D7_0716600 | cysteine desulfurase (SufS)                                            | 0.72  | 3.07    | 4.56    |
| PF3D7_0716700 | conserved Plasmodium protein, unknown function                         | 1.15  | 2.25    | 4.52    |
| PF3D7_0716800 | eukaryotic translation initiation factor 3 subunit I, putative (EIF3I) | 0.11  | 364.50  | 354.63  |
| PF3D7_0716900 | drug metabolite transporter, putative                                  | -0.49 | 47.99   | 30.92   |
| PF3D7_0717000 | conserved Plasmodium membrane protein, unknown function                | 0.15  | 13.61   | 13.61   |
| PF3D7_0717100 | conserved Plasmodium protein, unknown function                         | 0.64  | 9.15    | 12.85   |
| PF3D7_0717200 | conserved Plasmodium protein, unknown function                         | 0.53  | 55.17   | 71.83   |
| PF3D7_0717300 | transcription initiation factor IIE, alpha subunit, putative           | -0.02 | 58.95   | 52.47   |
| PF3D7_0717400 | queuine tRNA-ribosyltransferase, putative                              | -0.47 | 143.17  | 93.25   |
| PF3D7_0717500 | calcium-dependent protein kinase 4 (CDPK4)                             | 0.61  | 141.71  | 194.69  |
| PF3D7_0717600 | conserved Plasmodium protein, unknown function                         | -0.28 | 24.93   | 18.51   |
| PF3D7_0717700 | serine--tRNA ligase, putative                                          | -0.62 | 313.35  | 183.90  |
| PF3D7_0717800 | conserved Plasmodium protein, unknown function                         | 1.33  | 1.55    | 3.53    |
| PF3D7_0717900 | thioredoxin-like protein                                               | -0.06 | 11.50   | 9.96    |

|               |                                                                                             |       |         |          |
|---------------|---------------------------------------------------------------------------------------------|-------|---------|----------|
| PF3D7_0718000 | dynein heavy chain, putative                                                                | 1.33  | 0.30    | 0.68     |
| PF3D7_0718100 | exported serine/threonine protein kinase (EST)                                              | 1.02  | 5.95    | 10.91    |
| PF3D7_0718300 | cysteine repeat modular protein 2 (CRMP2)                                                   | 2.75  | 0.08    | 0.51     |
| PF3D7_0718400 | mitochondrial ribosomal protein S8 precursor, putative                                      | 1.63  | 29.58   | 82.79    |
| PF3D7_0718500 | prefoldin subunit 3, putative                                                               | 0.67  | 46.89   | 67.26    |
| PF3D7_0718600 | conserved Plasmodium protein, unknown function                                              | 1.08  | 5.93    | 11.33    |
| PF3D7_0718700 | conserved Plasmodium membrane protein, unknown function                                     | 0.77  | 2.33    | 3.60     |
| PF3D7_0718800 | conserved Plasmodium protein, unknown function                                              | 1.12  | 0.57    | 1.15     |
| PF3D7_0718900 | conserved Plasmodium protein, unknown function                                              | -0.44 | 0.95    | 0.62     |
| PF3D7_0719000 | conserved Plasmodium protein, unknown function                                              | -0.08 | 54.40   | 46.56    |
| PF3D7_0719100 | conserved Plasmodium protein, unknown function                                              | 0.36  | 13.81   | 15.95    |
| PF3D7_0719200 | NIMA related kinase 4 (NEK4)                                                                | 0.28  | 1.87    | 2.05     |
| PF3D7_0719300 | actin-related protein, putative (ARP6)                                                      | -0.55 | 80.48   | 49.53    |
| PF3D7_0719400 | conserved Plasmodium protein, unknown function                                              | 0.29  | 12.86   | 14.14    |
| PF3D7_0719500 | LEM3/CDC50 family protein, putative                                                         | 0.45  | 22.04   | 27.19    |
| PF3D7_0719600 | 60S ribosomal protein L11a, putative                                                        | -0.14 | 906.41  | 743.67   |
| PF3D7_0719700 | 40S ribosomal protein S10, putative                                                         | 0.34  | 700.45  | 798.54   |
| PF3D7_0719800 | conserved Plasmodium protein, unknown function                                              | -0.48 | 12.52   | 8.10     |
| PF3D7_0719900 | conserved Plasmodium membrane protein, unknown function                                     | -0.32 | 41.58   | 30.05    |
| PF3D7_0720000 | exosome complex component CSL4, putative (CSL4)                                             | -0.77 | 52.95   | 28.04    |
| PF3D7_0720100 | small subunit rRNA processing protein, putative                                             | -0.45 | 54.86   | 36.28    |
| PF3D7_0720200 | conserved Plasmodium protein, unknown function                                              | 0.30  | 48.66   | 54.05    |
| PF3D7_0720300 | conserved Plasmodium protein, unknown function                                              | 0.98  | 2.63    | 4.75     |
| PF3D7_0720400 | ferredoxin reductase-like protein                                                           | 0.12  | 26.22   | 25.73    |
| PF3D7_0720500 | conserved Plasmodium protein, unknown function                                              | 0.22  | 7.36    | 7.73     |
| PF3D7_0720600 | conserved Plasmodium protein, unknown function                                              | 0.65  | 41.18   | 58.24    |
| PF3D7_0720700 | phosphoinositide-binding protein, putative                                                  | -0.23 | 170.12  | 130.67   |
| PF3D7_0720800 | Ham1-like protein, putative                                                                 | 0.87  | 15.35   | 25.34    |
| PF3D7_0720900 | conserved Plasmodium protein, unknown function                                              | 0.58  | 20.58   | 27.73    |
| PF3D7_0721000 | conserved Plasmodium membrane protein, unknown function                                     | 0.36  | 14.81   | 17.11    |
| PF3D7_0721100 | conserved Plasmodium protein, unknown function                                              | -0.47 | 111.08  | 72.16    |
| PF3D7_0721200 | conserved Plasmodium protein, unknown function                                              | -0.52 | 19.36   | 12.15    |
| PF3D7_0721300 | DEAD/DEAH box ATP-dependent RNA helicase, putative                                          | -0.27 | 84.15   | 62.96    |
| PF3D7_0721400 | conserved Plasmodium protein, unknown function                                              | 0.66  | 18.68   | 26.67    |
| PF3D7_0721500 | conserved Plasmodium membrane protein, unknown function                                     | -1.20 | 2.17    | 0.85     |
| PF3D7_0721600 | 40S ribosomal protein S5, putative                                                          | 0.00  | 1596.62 | 1436.40  |
| PF3D7_0721700 | secreted ookinete protein, putative (PSOP1)                                                 | 0.95  | 5.68    | 9.91     |
| PF3D7_0721800 | conserved Plasmodium protein, unknown function                                              | 0.38  | 112.21  | 131.80   |
| PF3D7_0721900 | V-type ATPase V0 subunit e, putative                                                        | -0.04 | 53.97   | 47.23    |
| PF3D7_0722000 | conserved Plasmodium protein, unknown function                                              | -0.62 | 57.03   | 33.48    |
| PF3D7_0722100 | PelOta protein homologue, putative                                                          | -0.49 | 45.61   | 29.22    |
| PF3D7_0722200 | rhoptry-associated leucine zipper-like protein 1 (RALP1)                                    | 0.51  | 171.51  | 220.74   |
| PF3D7_0722300 | ubiquitin carboxyl-terminal hydrolase, putative                                             | -0.60 | 55.39   | 32.87    |
| PF3D7_0722400 | GTP-binding protein, putative                                                               | -0.28 | 261.25  | 194.10   |
| PF3D7_0722500 | cell cycle control protein ewf15, putative                                                  | 0.37  | 77.22   | 90.25    |
| PF3D7_0722600 | U3 small nucleolar RNA-associated protein 7, putative (UTP7)                                | -0.52 | 104.94  | 66.12    |
| PF3D7_0722700 | conserved Plasmodium protein, unknown function                                              | 0.39  | 30.24   | 35.79    |
| PF3D7_0722800 | conserved Plasmodium protein, unknown function                                              | 0.99  | 2.10    | 3.77     |
| PF3D7_0722900 | conserved Plasmodium protein, unknown function                                              | 0.53  | 4.39    | 5.74     |
| PF3D7_0723000 | tRNAHis guanylyltransferase, putative                                                       | -0.22 | 13.91   | 10.80    |
| PF3D7_0723100 | conserved Plasmodium protein, unknown function                                              | 1.04  | 0.55    | 1.03     |
| PF3D7_0723200 | conserved Plasmodium protein, unknown function                                              | 0.55  | 2.33    | 3.08     |
| PF3D7_0723300 | conserved Plasmodium protein, unknown function                                              | 1.57  | 22.15   | 59.29    |
| PF3D7_0723400 | conserved Plasmodium protein, unknown function                                              | -0.60 | 191.75  | 113.92   |
| PF3D7_0723500 | dynactin subunit 5, putative                                                                | -0.76 | 12.80   | 6.80     |
| PF3D7_0723600 | conserved Plasmodium protein, unknown function                                              | 0.16  | 44.70   | 45.04    |
| PF3D7_0723700 | metallo-hydrolase/oxidoreductase, putative                                                  | 0.60  | 17.35   | 23.65    |
| PF3D7_0723800 | conserved Plasmodium protein, unknown function                                              | 0.71  | 29.36   | 43.34    |
| PF3D7_0723900 | conserved Plasmodium protein, unknown function                                              | -0.57 | 89.13   | 54.02    |
| PF3D7_0724000 | Rab GTPase activator and protein kinase, putative                                           | -0.78 | 3.32    | 1.74     |
| PF3D7_0724100 | conserved Plasmodium protein, unknown function                                              | 0.70  | 67.82   | 99.51    |
| PF3D7_0724200 | type 2A phosphatase-associated protein 42, putative (TAP42)                                 | -0.28 | 22.92   | 17.06    |
| PF3D7_0724300 | 3-demethylubiquinone-9 3-methyltransferase, putative (COQ3)                                 | -0.89 | 6.55    | 3.19     |
| PF3D7_0724400 | mitochondrial import inner membrane translocase subunit TIM14, putative (PAM18)             | -0.61 | 105.43  | 62.21    |
| PF3D7_0724500 | conserved Plasmodium protein, unknown function                                              | -1.40 | 12.36   | 4.20     |
| PF3D7_0724600 | protein kinase, putative                                                                    | -0.26 | 9.31    | 7.00     |
| PF3D7_0724700 | conserved Plasmodium protein, unknown function                                              | -1.36 | 45.36   | 15.94    |
| PF3D7_0724800 | kelch protein, putative                                                                     | 0.97  | 14.11   | 24.87    |
| PF3D7_0724900 | kinesin-19, putative                                                                        | 2.25  | 2.70    | 11.63    |
| PF3D7_0725000 | exonuclease I, putative                                                                     | 0.16  | 14.41   | 14.53    |
| PF3D7_0725100 | conserved Plasmodium membrane protein, unknown function                                     | -0.58 | 26.53   | 15.96    |
| PF3D7_0725200 | mago nashi protein homologue, putative                                                      | 0.04  | 76.22   | 70.89    |
| PF3D7_0725300 | conserved Plasmodium protein, unknown function                                              | 0.14  | 64.30   | 64.02    |
| PF3D7_0725400 | conserved Plasmodium protein, unknown function                                              | 2.17  | 53.49   | 217.53   |
| PF3D7_0725500 | unspecified product                                                                         | 0.29  | 47.15   | 52.16    |
| PF3D7_0725600 | 18S ribosomal RNA                                                                           | 2.30  | 1004.72 | 4457.53  |
| PF3D7_0725700 | unspecified product                                                                         | 2.11  | 2.33    | 9.28     |
| PF3D7_0725800 | 5.8S ribosomal RNA                                                                          | 4.88  | 62.27   | 1656.86  |
| PF3D7_0725900 | unspecified product                                                                         | 1.66  | 24.78   | 71.07    |
| PF3D7_0726000 | 28S ribosomal RNA                                                                           | 4.30  | 1595.88 | 28389.70 |
| PF3D7_0726100 | Plasmodium exported protein, unknown function                                               | -0.27 | 300.30  | 225.18   |
| PF3D7_0726200 | serine/threonine protein kinase, FIKK family (FIKK7.1)                                      | -0.41 | 41.69   | 28.27    |
| PF3D7_0726300 | DNA mismatch repair protein PMS1, putative (PMS1)                                           | -0.93 | 18.67   | 8.86     |
| PF3D7_0726400 | conserved Plasmodium membrane protein, unknown function                                     | -0.60 | 17.40   | 10.37    |
| PF3D7_0726500 | ubiquitin carboxyl-terminal hydrolase, putative                                             | -0.34 | 95.18   | 67.89    |
| PF3D7_0726600 | conserved Plasmodium protein, unknown function                                              | 0.79  | 4.52    | 7.08     |
| PF3D7_0726700 | conserved Plasmodium protein, unknown function                                              | 0.49  | 25.33   | 32.14    |
| PF3D7_0726800 | dolichyl-diphosphooligosaccharide-protein glycosyltransferase subunit DAD1, putative (DAD1) | 0.32  | 2.07    | 2.35     |
| PF3D7_0726900 | mitochondrial import inner membrane translocase subunit TIM50, putative (TIM50)             | -0.42 | 12.79   | 8.64     |
| PF3D7_0727000 | vacuolar protein sorting-associated protein 53, putative (VPS53)                            | 0.21  | 16.24   | 17.00    |
| PF3D7_0727100 | conserved Plasmodium protein, unknown function                                              | 0.27  | 9.36    | 10.21    |
| PF3D7_0727200 | cysteine desulfurase, putative (NFS)                                                        | -0.24 | 66.77   | 50.95    |
| PF3D7_0727300 | DNA (cytosine-5)-methyltransferase (DNMT)                                                   | -0.05 | 25.06   | 21.88    |
| PF3D7_0727400 | proteasome subunit alpha type-5, putative                                                   | 0.02  | 164.09  | 150.04   |
| PF3D7_0727500 | conserved Plasmodium protein, unknown function                                              | 0.06  | 4.48    | 4.21     |
| PF3D7_0727600 | conserved Plasmodium protein, unknown function                                              | 0.40  | 1.01    | 1.21     |
| PF3D7_0727700 | conserved Plasmodium protein, unknown function                                              | -0.19 | 4.37    | 3.45     |
| PF3D7_0727800 | cation transporting ATPase, putative                                                        | -0.59 | 34.25   | 20.54    |



|                 |                                                                    |       |         |         |
|-----------------|--------------------------------------------------------------------|-------|---------|---------|
| PF3D7_0727900   | conserved Plasmodium protein, unknown function                     | -2.32 | 38.14   | 6.91    |
| PF3D7_0728000   | eukaryotic translation initiation factor 2 alpha subunit, putative | -0.29 | 346.20  | 254.61  |
| PF3D7_0728100   | conserved Plasmodium membrane protein, unknown function            | 0.34  | 2.48    | 2.82    |
| PF3D7_0728200   | actin-like protein, putative (ALP3)                                | 0.23  | 4.40    | 4.66    |
| PF3D7_0728300   | conserved Plasmodium protein, unknown function                     | 0.80  | 5.60    | 8.80    |
| PF3D7_0728400.1 | conserved Plasmodium protein, unknown function                     | -0.36 | 5.11    | 3.57    |
| PF3D7_0728400.2 | conserved Plasmodium protein, unknown function                     | -0.28 | 4.82    | 3.57    |
| PF3D7_0728500   | conserved Plasmodium protein, unknown function                     | 0.67  | 0.47    | 0.69    |
| PF3D7_0728600   | zinc finger, C3HC4 type, putative                                  | 1.36  | 10.91   | 25.35   |
| PF3D7_0728700   | alpha/beta hydrolase, putative                                     | 1.68  | 1.53    | 4.45    |
| PF3D7_0728800   | conserved Plasmodium protein, unknown function                     | 0.05  | 10.33   | 9.65    |
| PF3D7_0728900   | RNA-binding protein, putative                                      | 0.12  | 48.27   | 47.38   |
| PF3D7_0729000   | signal recognition particle subunit SRP9 (SRP9)                    | -0.70 | 26.64   | 14.76   |
| PF3D7_0729100   | conserved Plasmodium protein, unknown function                     | 0.07  | 13.69   | 12.97   |
| PF3D7_0729200   | 1-cys peroxiredoxin (AOP)                                          | 0.19  | 6.38    | 6.56    |
| PF3D7_0729300   | 60S ribosomal export protein NMD3, putative (NMD3)                 | -0.56 | 72.59   | 44.43   |
| PF3D7_0729400   | ribosome biogenesis protein BRX1 homolog, putative                 | -0.19 | 163.66  | 129.88  |
| PF3D7_0729500   | mRNA (N6-adenosine)-methyltransferase, putative                    | -0.31 | 73.95   | 53.78   |
| PF3D7_0729600   | conserved Plasmodium protein, unknown function                     | 1.52  | 14.16   | 36.75   |
| PF3D7_0729700   | conserved Plasmodium protein, unknown function                     | -0.39 | 1.70    | 1.17    |
| PF3D7_0729800   | dynein light chain, putative                                       | -1.40 | 1.07    | 0.31    |
| PF3D7_0729900   | dynein heavy chain, putative                                       | 1.44  | 2.08    | 5.10    |
| PF3D7_0730000   | conserved Plasmodium protein, unknown function                     | 1.16  | 3.38    | 6.89    |
| PF3D7_0730100   | tRNA pseudouridine synthase D, putative                            | 0.47  | 2.20    | 2.76    |
| PF3D7_0730200   | AP-4 complex subunit beta, putative                                | -0.99 | 30.07   | 13.67   |
| PF3D7_0730300   | transcription factor with AP2 domain(s) (AP2-L)                    | -0.77 | 663.24  | 350.82  |
| PF3D7_0730400   | conserved Plasmodium protein, unknown function                     | 1.44  | 29.11   | 71.55   |
| PF3D7_0730500   | conserved Plasmodium protein, unknown function                     | 0.31  | 12.72   | 14.25   |
| PF3D7_0730600   | tRNA Valine                                                        | 1.19  | 0.61    | 1.58    |
| PF3D7_0730700   | tRNA Threonine                                                     | 0.19  | 0.00    | 0.00    |
| PF3D7_0730800.1 | Plasmodium exported protein, unknown function                      | 0.30  | 1462.22 | 1625.45 |
| PF3D7_0730800.2 | Plasmodium exported protein, unknown function                      | 0.30  | 1455.65 | 1614.84 |
| PF3D7_0730900   | EMP1-trafficking protein (PTP4)                                    | -0.20 | 717.79  | 565.54  |
| PF3D7_0731000   | unspecified product                                                | -1.47 | 10.31   | 3.34    |
| PF3D7_0731100   | EMP1-trafficking protein (PTP2)                                    | -0.48 | 902.07  | 582.76  |
| PF3D7_0731200   | Plasmodium exported protein, unknown function                      | -1.08 | 137.00  | 58.59   |
| PF3D7_0731300   | Plasmodium exported protein (PHISTb), unknown function (PG174)     | -0.88 | 466.07  | 228.78  |
| PF3D7_0731400   | serine/threonine protein kinase, FIKK family, pseudogene (FIKK7.2) | 0.36  | 24.27   | 28.04   |
| PF3D7_0731500   | erythrocyte binding antigen-175 (EBA175)                           | 1.74  | 52.19   | 157.21  |
| PF3D7_0731600   | acyl-CoA synthetase (ACSS)                                         | -0.29 | 87.36   | 64.36   |
| PF3D7_0731700   | Plasmodium exported protein (hyp9), unknown function               | 0.19  | 8.87    | 9.12    |
| PF3D7_0731800   | alpha/beta hydrolase, putative (GEXP08)                            | -0.35 | 36.71   | 25.91   |
| PF3D7_0731900   | rifin, pseudogene (RIF)                                            | 1.97  | 0.14    | 0.55    |
| PF3D7_0732000   | stevor                                                             | 1.47  | 0.15    | 0.41    |
| PF3D7_0732100   | erythrocyte membrane protein 1 (PfEMP1), pseudogene (VAR)          | 0.45  | 0.16    | 0.20    |
| PF3D7_0732200   | rifin (RIF)                                                        | 2.51  | 0.06    | 0.40    |
| PF3D7_0732300   | rifin (RIF)                                                        | 0.93  | 0.04    | 0.09    |
| PF3D7_0732400   | rifin (RIF)                                                        | 0.51  | 0.14    | 0.18    |
| PF3D7_0732500   | rifin (RIF)                                                        | 1.15  | 0.32    | 0.66    |
| PF3D7_0732600   | Plasmodium exported protein, unknown function, fragment            | 0.19  | 0.00    | 0.00    |
| PF3D7_0732700   | rifin (RIF)                                                        | 2.10  | 0.06    | 0.30    |
| PF3D7_0732800   | erythrocyte membrane protein 1 (PfEMP1), exon 2                    | 0.06  | 0.57    | 0.54    |
| PF3D7_0732900   | rifin (RIF)                                                        | 0.40  | 3.43    | 4.09    |
| PF3D7_0733000   | erythrocyte membrane protein 1, PfEMP1 (VAR)                       | 0.79  | 3.14    | 4.91    |
| PF3D7_0800100   | erythrocyte membrane protein 1, PfEMP1 (VAR)                       | 1.42  | 3.76    | 9.07    |
| PF3D7_0800200   | erythrocyte membrane protein 1, PfEMP1 (VAR)                       | 0.62  | 0.70    | 0.97    |
| PF3D7_0800300   | erythrocyte membrane protein 1, PfEMP1 (VAR)                       | 0.90  | 1.70    | 2.87    |
| PF3D7_0800400   | rifin (RIF)                                                        | 0.59  | 7.74    | 10.48   |
| PF3D7_0800500   | rifin (RIF)                                                        | 2.46  | 0.81    | 4.12    |
| PF3D7_0800600   | Plasmodium exported protein (PHISTa), unknown function             | 1.06  | 1.66    | 3.15    |
| PF3D7_0800700   | surface-associated interspersed protein 8.3 (SURFIN 8.3)           | 1.34  | 2.14    | 4.90    |
| PF3D7_0800800   | Plasmodium exported protein (hyp7), unknown function               | 0.36  | 3.13    | 3.62    |
| PF3D7_0800900   | Plasmodium exported protein (hyp7), unknown function, pseudogene   | -2.49 | 20.25   | 3.22    |
| PF3D7_0801000   | Plasmodium exported protein (PHISTc), unknown function             | -0.55 | 615.81  | 379.63  |
| PF3D7_0801100   | 28S ribosomal RNA                                                  | 1.65  | 0.70    | 1.98    |
| PF3D7_0801200   | 5.8S ribosomal RNA                                                 | 1.77  | 0.28    | 1.14    |
| PF3D7_0801300   | von Willebrand factor A domain-related protein (WARP)              | 0.98  | 1.92    | 3.46    |
| PF3D7_0801400   | probable protein, unknown function                                 | 0.48  | 2.46    | 3.11    |
| PF3D7_0801500   | nucleolar protein 10, putative (NOL10)                             | -0.23 | 75.40   | 57.95   |
| PF3D7_0801600   | conserved Plasmodium protein, unknown function                     | -0.78 | 2.96    | 1.52    |
| PF3D7_0801700   | sentrin-specific protease 2, putative (SEN2)                       | 0.18  | 17.25   | 17.59   |
| PF3D7_0801800   | mannose-6-phosphate isomerase, putative                            | -0.89 | 262.03  | 127.45  |
| PF3D7_0801900   | conserved Plasmodium protein, unknown function                     | -0.57 | 19.38   | 11.74   |
| PF3D7_0802000   | glutamate dehydrogenase, putative (GDH3)                           | 0.01  | 144.36  | 131.54  |
| PF3D7_0802100   | transcription factor with AP2 domain(s) (ApiAP2)                   | -0.14 | 33.50   | 27.49   |
| PF3D7_0802200   | 1-cys peroxiredoxin (1-CysPxn)                                     | 1.85  | 55.31   | 179.86  |
| PF3D7_0802300   | periodic tryptophan protein 2, putative (PWP2)                     | -0.36 | 62.63   | 43.96   |
| PF3D7_0802400   | conserved Plasmodium protein, unknown function                     | -0.65 | 69.14   | 39.85   |
| PF3D7_0802500   | inositol 5-phosphatase, putative                                   | -0.27 | 21.60   | 16.20   |
| PF3D7_0802600   | adenylyl cyclase beta (ACbeta)                                     | 0.63  | 32.19   | 44.81   |
| PF3D7_0802700   | conserved Plasmodium protein, unknown function                     | 0.04  | 2.43    | 2.26    |
| PF3D7_0802800   | serine/threonine protein phosphatase 2B catalytic subunit A (CNA)  | 1.18  | 41.90   | 85.42   |
| PF3D7_0802900   | conserved Plasmodium protein, unknown function                     | 0.26  | 4.23    | 4.57    |
| PF3D7_0803000   | peptidyl-prolyl cis-trans isomerase (CYP81)                        | 0.01  | 80.85   | 73.70   |
| PF3D7_0803100   | U3 small nucleolar RNA-associated protein 14, putative (UTP14)     | 0.18  | 80.27   | 81.80   |
| PF3D7_0803200   | filament assembling protein, putative                              | -0.08 | 34.27   | 29.34   |
| PF3D7_0803300   | mitogen-activated protein kinase organizer 1, putative (MORG1)     | 0.52  | 12.81   | 16.57   |
| PF3D7_0803400   | DNA repair and recombination protein RAD54, putative (RAD54)       | 0.92  | 37.41   | 63.90   |
| PF3D7_0803500   | AAA family ATPase, putative                                        | -0.16 | 25.37   | 20.53   |
| PF3D7_0803600   | conserved Plasmodium protein, unknown function                     | -0.25 | 41.76   | 31.65   |
| PF3D7_0803700   | tubulin gamma chain (g-tub)                                        | -0.62 | 18.99   | 11.13   |
| PF3D7_0803800   | proteasome subunit beta type-4                                     | -0.56 | 210.52  | 129.21  |
| PF3D7_0803900   | C/D small nucleolar RNA                                            | 0.55  | 1.03    | 1.42    |
| PF3D7_0804000   | cactin homolog, putative                                           | -0.29 | 96.52   | 71.24   |
| PF3D7_0804100   | small nucleolar RNA snoR06                                         | 0.04  | 61.93   | 57.44   |
| PF3D7_0804200   | Plasmodium RNA of unknown function RUF3                            | -0.81 | 0.42    | 0.14    |
| PF3D7_0804300   | conserved Plasmodium protein, unknown function                     | -0.26 | 121.23  | 91.31   |
| PF3D7_0804400   | methionine aminopeptidase 1c, putative (METAP1c)                   | 0.06  | 8.18    | 7.71    |

|                 |                                                                                   |       |         |         |
|-----------------|-----------------------------------------------------------------------------------|-------|---------|---------|
| PF3D7_0804500   | conserved Plasmodium membrane protein, unknown function                           | 0.39  | 19.79   | 23.33   |
| PF3D7_0804600   | U2 snRNA/tRNA pseudouridine synthase, putative                                    | -0.18 | 48.22   | 38.37   |
| PF3D7_0804700   | conserved Plasmodium protein, unknown function                                    | -1.10 | 8.82    | 3.71    |
| PF3D7_0804800   | peptidyl-prolyl cis-trans isomerase (CYP24)                                       | -0.23 | 151.59  | 116.95  |
| PF3D7_0804900   | GTPase-activating protein, putative                                               | -0.76 | 94.29   | 50.19   |
| PF3D7_0805000   | alpha/beta hydrolase, putative                                                    | 0.76  | 9.47    | 14.45   |
| PF3D7_0805100   | conserved Plasmodium protein, unknown function                                    | 1.67  | 5.23    | 15.03   |
| PF3D7_0805200   | gamete release protein, putative (GAMER)                                          | 0.96  | 28.36   | 49.74   |
| PF3D7_0805300   | conserved Plasmodium protein, unknown function                                    | 1.09  | 4.09    | 7.87    |
| PF3D7_0805400   | acetyltransferase, putative                                                       | -0.42 | 27.12   | 18.34   |
| PF3D7_0805500   | conserved Plasmodium protein, unknown function                                    | -0.58 | 28.72   | 17.29   |
| PF3D7_0805600   | PAP2-like protein, putative                                                       | -1.15 | 154.70  | 62.76   |
| PF3D7_0805700   | serine/threonine protein kinase, FIKK family (FIKK8)                              | -1.37 | 26.23   | 9.17    |
| PF3D7_0805800   | conserved Plasmodium protein, unknown function                                    | 0.38  | 0.22    | 0.26    |
| PF3D7_0805900   | conserved protein, unknown function                                               | 1.13  | 5.50    | 10.90   |
| PF3D7_0806000   | AAA family ATPase, putative                                                       | -0.89 | 20.92   | 10.15   |
| PF3D7_0806100   | conserved Plasmodium protein, unknown function                                    | -0.53 | 9.05    | 5.67    |
| PF3D7_0806200   | conserved Plasmodium membrane protein, unknown function                           | 0.07  | 10.08   | 9.54    |
| PF3D7_0806300   | ferlin, putative                                                                  | 0.29  | 14.97   | 16.49   |
| PF3D7_0806400   | glycosyltransferase family 28 protein, putative                                   | 0.21  | 3.15    | 3.28    |
| PF3D7_0806500   | DnaJ protein, putative                                                            | 0.28  | 72.91   | 79.71   |
| PF3D7_0806600   | kinesin-like protein, putative                                                    | -0.82 | 39.03   | 19.95   |
| PF3D7_0806700   | conserved Plasmodium membrane protein, unknown function                           | -0.75 | 32.90   | 17.60   |
| PF3D7_0806800   | vacuolar proton translocating ATPase subunit A, putative                          | -0.26 | 272.72  | 204.99  |
| PF3D7_0806900   | conserved Plasmodium protein, unknown function                                    | -1.22 | 17.43   | 6.75    |
| PF3D7_0807000   | gas41 homologue, putative                                                         | -0.52 | 35.76   | 22.48   |
| PF3D7_0807100   | RNA helicase, putative                                                            | -0.88 | 25.77   | 12.62   |
| PF3D7_0807200   | conserved Plasmodium membrane protein, unknown function                           | -0.95 | 49.98   | 23.38   |
| PF3D7_0807300   | ras-related protein Rab-18 (RAB18)                                                | -0.64 | 126.01  | 73.00   |
| PF3D7_0807400   | conserved Plasmodium protein, unknown function                                    | -0.53 | 8.56    | 5.32    |
| PF3D7_0807500   | proteasome subunit alpha type-6, putative                                         | 0.14  | 181.51  | 180.83  |
| PF3D7_0807600   | conserved Plasmodium protein, unknown function                                    | 0.03  | 142.13  | 130.76  |
| PF3D7_0807700   | serine protease DegP (DegP)                                                       | 0.81  | 12.07   | 19.10   |
| PF3D7_0807800   | 26S proteasome regulatory subunit RPN10, putative (RPN10)                         | -0.88 | 206.21  | 101.17  |
| PF3D7_0807900   | tyrosine-tRNA ligase (TyrRS)                                                      | -0.33 | 195.59  | 140.73  |
| PF3D7_0808000   | conserved Plasmodium protein, unknown function                                    | -0.29 | 0.96    | 0.70    |
| PF3D7_0808100   | AP-3 complex subunit delta, putative                                              | -1.39 | 10.08   | 3.46    |
| PF3D7_0808200   | plasmepsin X                                                                      | 1.92  | 19.38   | 66.28   |
| PF3D7_0808300   | ubiquitin regulatory protein, putative                                            | 0.56  | 159.42  | 212.47  |
| PF3D7_0808400   | coatomer subunit epsilon, putative (SEC28)                                        | -1.87 | 38.86   | 9.58    |
| PF3D7_0808500   | Plasmodium RNA of unknown function RUF6-4                                         | -1.40 | 0.30    | 0.00    |
| PF3D7_0808600   | erythrocyte membrane protein 1, PfEMP1 (VAR)                                      | 0.62  | 2.04    | 2.83    |
| PF3D7_0808700   | erythrocyte membrane protein 1, PfEMP1 (VAR)                                      | 0.42  | 1.39    | 1.67    |
| PF3D7_0808800   | rifin (RIF)                                                                       | -0.42 | 2.71    | 1.82    |
| PF3D7_0808900   | rifin (RIF)                                                                       | 0.48  | 2.83    | 3.55    |
| PF3D7_0809000   | Plasmodium RNA of unknown function RUF6-10                                        | -0.81 | 0.21    | 0.00    |
| PF3D7_0809100   | erythrocyte membrane protein 1, PfEMP1 (VAR)                                      | -0.22 | 8.78    | 6.79    |
| PF3D7_0809200   | asparagine-rich antigen Pfa55-14 (pfa55-14)                                       | -1.51 | 30.05   | 9.48    |
| PF3D7_0809300   | unspecified product                                                               | 0.13  | 10.10   | 9.99    |
| PF3D7_0809400   | conserved Plasmodium protein, unknown function                                    | 0.91  | 5.80    | 9.81    |
| PF3D7_0809500   | histone acetyltransferase subunit NuA4, putative                                  | 0.04  | 46.51   | 43.21   |
| PF3D7_0809600   | peptidase family C50, putative                                                    | 0.25  | 1.75    | 1.88    |
| PF3D7_0809700   | RuvB-like helicase 1 (RUVB1)                                                      | 2.01  | 2.21    | 8.03    |
| PF3D7_0809800   | conserved Plasmodium protein, unknown function                                    | -0.11 | 1.48    | 1.24    |
| PF3D7_0809900   | JmjC domain containing protein (JmjC1)                                            | -1.33 | 30.31   | 10.84   |
| PF3D7_0810000   | acyl-CoA binding protein, putative                                                | 0.59  | 75.16   | 102.16  |
| PF3D7_0810100   | apicoplast ribosomal protein L33 precursor, putative                              | -0.86 | 2.13    | 1.03    |
| PF3D7_0810200   | ABC1 family, putative (ABCK1)                                                     | 0.70  | 4.42    | 6.47    |
| PF3D7_0810300   | protein phosphatase PPM5, putative (PPM5)                                         | 1.84  | 78.34   | 253.14  |
| PF3D7_0810400   | aquaporin, putative (AQP2)                                                        | -0.39 | 5.98    | 4.12    |
| PF3D7_0810500   | protein phosphatase PPM7, putative (PPM7)                                         | 0.56  | 33.18   | 44.01   |
| PF3D7_0810600   | RNA helicase, putative                                                            | -0.97 | 396.40  | 182.93  |
| PF3D7_0810700   | conserved Plasmodium protein, unknown function                                    | -0.47 | 11.46   | 7.46    |
| PF3D7_0810800   | hydroxymethylidihydropterin pyrophosphokinase-dihydropterote synthase (PPPK-DHPS) | -0.76 | 31.24   | 16.59   |
| PF3D7_0810900.1 | conserved Plasmodium protein, unknown function                                    | 0.22  | 10.25   | 10.74   |
| PF3D7_0810900.2 | conserved Plasmodium protein, unknown function                                    | 0.22  | 8.63    | 9.06    |
| PF3D7_0811000   | cullin-1, putative (CUL1)                                                         | -0.03 | 14.74   | 13.01   |
| PF3D7_0811100   | mitochondrial carrier protein, putative                                           | -0.58 | 6.74    | 4.06    |
| PF3D7_0811200   | ER membrane protein complex subunit 1, putative (EMC1)                            | -1.27 | 41.56   | 15.54   |
| PF3D7_0811300   | CCR4-associated factor 1 (CAF1)                                                   | -0.86 | 571.40  | 284.98  |
| PF3D7_0811400   | conserved protein, unknown function                                               | -0.22 | 274.10  | 211.93  |
| PF3D7_0811500   | histone-arginine methyltransferase CARM1, putative (CARM1)                        | -1.14 | 37.10   | 15.16   |
| PF3D7_0811600   | conserved Plasmodium protein, unknown function                                    | -1.14 | 37.17   | 15.21   |
| PF3D7_0811700   | conserved Plasmodium protein, unknown function                                    | -0.19 | 1.09    | 0.86    |
| PF3D7_0811800   | conserved Plasmodium protein, unknown function                                    | -0.61 | 3.47    | 2.05    |
| PF3D7_0811900   | RNA-binding protein, putative                                                     | 0.12  | 11.89   | 11.65   |
| PF3D7_0812000   | conserved Plasmodium protein, unknown function                                    | -1.04 | 6.42    | 2.81    |
| PF3D7_0812100   | conserved Plasmodium protein, unknown function                                    | -0.73 | 37.14   | 20.27   |
| PF3D7_0812200   | trypsin-like serine protease, putative                                            | 0.08  | 1.99    | 1.90    |
| PF3D7_0812220   | GTPase, putative                                                                  | -0.06 | 6.22    | 5.38    |
| PF3D7_0812300   | sporozoite surface protein 3, putative (SSP3)                                     | -0.20 | 3.23    | 2.54    |
| PF3D7_0812400   | karyopherin alpha (KARalpha)                                                      | 0.36  | 210.46  | 243.56  |
| PF3D7_0812500   | RNA-binding protein, putative                                                     | -0.14 | 195.24  | 160.13  |
| PF3D7_0812600   | ubiquitin-conjugating enzyme, putative                                            | -0.46 | 53.95   | 35.43   |
| PF3D7_0812700   | RNA-binding protein (U1 snRNP-like), putative                                     | -0.87 | 80.65   | 39.85   |
| PF3D7_0812800   | conserved Plasmodium protein, unknown function                                    | 0.67  | 9.51    | 13.67   |
| PF3D7_0812900   | probable protein, unknown function                                                | 0.72  | 1.28    | 1.90    |
| PF3D7_0813000   | conserved Plasmodium protein, unknown function                                    | -0.36 | 105.49  | 74.21   |
| PF3D7_0813100   | conserved Plasmodium protein, unknown function                                    | 0.40  | 20.71   | 24.62   |
| PF3D7_0813200   | CS domain protein, putative                                                       | 0.08  | 33.69   | 32.05   |
| PF3D7_0813300   | conserved Plasmodium protein, unknown function                                    | 0.88  | 581.00  | 967.43  |
| PF3D7_0813400   | conserved Plasmodium protein, unknown function                                    | -0.70 | 885.90  | 491.18  |
| PF3D7_0813500   | conserved Plasmodium protein, unknown function                                    | 0.46  | 5.41    | 6.71    |
| PF3D7_0813600   | translation initiation factor SU11, putative                                      | -0.30 | 144.25  | 106.05  |
| PF3D7_0813700   | ABC transporter F family member 1, putative (ABCF1)                               | 0.83  | 6.80    | 10.91   |
| PF3D7_0813800   | GDP-mannose 4,6-dehydratase (GMD)                                                 | 0.69  | 11.74   | 17.09   |
| PF3D7_0813900   | 40S ribosomal protein S16, putative                                               | -0.24 | 1563.50 | 1191.37 |
| PF3D7_0814000   | 60S ribosomal protein L13-2, putative                                             | 0.40  | 1328.42 | 1585.91 |

|               |                                                                                  |       |         |         |
|---------------|----------------------------------------------------------------------------------|-------|---------|---------|
| PF3D7_0814100 | conserved Plasmodium protein, unknown function                                   | -1.38 | 38.34   | 13.24   |
| PF3D7_0814200 | DNA/RNA-binding protein Alba 1 (ALBA1)                                           | 0.78  | 3932.26 | 6102.90 |
| PF3D7_0814300 | ATPase, putative                                                                 | -0.75 | 56.77   | 30.48   |
| PF3D7_0814400 | phospholipase DDHD1, putative                                                    | -0.53 | 11.33   | 7.06    |
| PF3D7_0814500 | conserved Plasmodium protein, unknown function                                   | -1.02 | 49.61   | 22.13   |
| PF3D7_0814600 | conserved Plasmodium protein, unknown function                                   | 0.98  | 5.29    | 9.41    |
| PF3D7_0814700 | conserved Plasmodium protein, unknown function                                   | 0.81  | 1.99    | 3.18    |
| PF3D7_0814900 | superoxide dismutase [Fe] (FeSOD)                                                | 0.28  | 145.35  | 158.97  |
| PF3D7_0815000 | selenoprotein (Sel3)                                                             | -0.09 | 5.01    | 4.25    |
| PF3D7_0815100 | RAP protein, putative                                                            | 1.21  | 1.11    | 2.33    |
| PF3D7_0815200 | importin beta, putative                                                          | -0.98 | 186.83  | 85.34   |
| PF3D7_0815300 | FAD-dependent monooxygenase, putative                                            | 0.55  | 1.92    | 2.53    |
| PF3D7_0815400 | conserved Plasmodium protein, unknown function                                   | 0.70  | 9.37    | 13.78   |
| PF3D7_0815500 | conserved Plasmodium protein, unknown function                                   | -0.29 | 17.27   | 12.73   |
| PF3D7_0815600 | eukaryotic translation initiation factor 3 subunit G, putative (EIF3G)           | 0.29  | 294.36  | 324.42  |
| PF3D7_0815700 | ubiquitin (Ub)                                                                   | -2.53 | 2.22    | 0.33    |
| PF3D7_0815800 | vacuolar protein sorting-associated protein 9, putative (VPS9)                   | 0.49  | 40.91   | 51.79   |
| PF3D7_0815900 | dihydrolipoyl dehydrogenase, apicoplast (aLipDH)                                 | 0.91  | 3.03    | 5.14    |
| PF3D7_0816000 | ribosome assembly protein RRB1, putative (RRB1)                                  | -0.57 | 133.67  | 81.34   |
| PF3D7_0816100 | phosphopantothienoylcysteine decarboxylase, putative                             | 0.22  | 45.36   | 47.59   |
| PF3D7_0816200 | vacuolar protein sorting-associated protein 2, putative (VPS2)                   | 0.26  | 23.11   | 24.93   |
| PF3D7_0816300 | conserved Plasmodium protein, unknown function                                   | -1.31 | 2.57    | 0.93    |
| PF3D7_0816400 | conserved Plasmodium protein, unknown function                                   | 0.36  | 15.92   | 18.40   |
| PF3D7_0816500 | small heat shock protein HSP20, putative (HSP20)                                 | 2.51  | 0.39    | 2.17    |
| PF3D7_0816600 | chaperone protein ClpB1 (ClpB1)                                                  | 1.41  | 10.51   | 25.27   |
| PF3D7_0816700 | trafficking protein particle complex subunit 2-like protein, putative (TRAPP2CL) | -0.59 | 8.81    | 5.28    |
| PF3D7_0816800 | meiotic recombination protein DMC1, putative (DMC1)                              | 2.38  | 0.24    | 1.19    |
| PF3D7_0816900 | adenylate kinase 2 (AK2)                                                         | 1.87  | 0.11    | 0.42    |
| PF3D7_0817000 | NEDD8-activating enzyme E1 catalytic subunit, putative                           | -0.17 | 1.30    | 1.04    |
| PF3D7_0817100 | GTPase, putative                                                                 | 1.26  | 1.32    | 2.87    |
| PF3D7_0817200 | conserved Plasmodium protein, unknown function                                   | -0.67 | 44.02   | 25.00   |
| PF3D7_0817300 | asparagine-rich antigen                                                          | -0.40 | 24.97   | 17.05   |
| PF3D7_0817400 | phosphatase, putative                                                            | -0.85 | 3.94    | 1.97    |
| PF3D7_0817500 | protein kinase c inhibitor-like protein, putative                                | 0.62  | 313.07  | 432.95  |
| PF3D7_0817600 | conserved Plasmodium protein, unknown function                                   | 0.92  | 71.77   | 122.61  |
| PF3D7_0817700 | rhostry neck protein 5 (RON5)                                                    | -0.32 | 73.11   | 52.99   |
| PF3D7_0817800 | conserved Plasmodium protein, unknown function                                   | 0.71  | 26.47   | 39.22   |
| PF3D7_0817900 | high mobility group protein B2 (HMGB2)                                           | 0.96  | 487.57  | 856.18  |
| PF3D7_0818000 | conserved protein, unknown function                                              | -0.81 | 179.08  | 91.98   |
| PF3D7_0818100 | zinc finger protein, putative                                                    | 1.33  | 13.87   | 31.49   |
| PF3D7_0818200 | 14-3-3 protein (14-3-3I)                                                         | 0.12  | 1529.68 | 1504.92 |
| PF3D7_0818300 | dynactin subunit 6, putative                                                     | 0.14  | 1.74    | 1.74    |
| PF3D7_0818400 | rRNA-processing protein FCF1, putative (FCF1)                                    | 0.46  | 96.58   | 119.97  |
| PF3D7_0818500 | zinc finger protein, putative                                                    | -0.79 | 433.22  | 225.50  |
| PF3D7_0818600 | BEM46-like protein, putative (PBLP)                                              | 0.34  | 27.43   | 31.34   |
| PF3D7_0818700 | DNA helicase, putative                                                           | -1.00 | 140.84  | 63.64   |
| PF3D7_0818800 | U3 small nucleolar ribonucleoprotein protein IMP4, putative (IMP4)               | -1.69 | 132.34  | 36.99   |
| PF3D7_0818900 | heat shock protein 70 (HSP70)                                                    | 0.51  | 3247.31 | 4161.85 |
| PF3D7_0819000 | conserved Plasmodium protein, unknown function                                   | -0.60 | 107.08  | 63.87   |
| PF3D7_0819100 | BRIX domain, putative                                                            | -0.59 | 55.14   | 32.94   |
| PF3D7_0819200 | perforin-like protein 5 (PLP5)                                                   | -0.69 | 6.13    | 3.42    |
| PF3D7_0819300 | conserved Plasmodium protein, unknown function                                   | -0.29 | 0.72    | 0.53    |
| PF3D7_0819400 | perforin-like protein 4 (PLP4)                                                   | 1.34  | 0.50    | 1.16    |
| PF3D7_0819500 | conserved protein, unknown function                                              | 2.27  | 4.17    | 18.17   |
| PF3D7_0819600 | conserved Plasmodium protein, unknown function                                   | 0.59  | 55.41   | 75.14   |
| PF3D7_0819700 | conserved Plasmodium protein, unknown function                                   | -0.85 | 9.49    | 4.75    |
| PF3D7_0819800 | conserved Plasmodium protein, unknown function                                   | 1.33  | 1.45    | 3.28    |
| PF3D7_0819900 | U6 snRNA-associated Sm-like protein LSM3, putative (LSM3)                        | -0.37 | 23.29   | 16.19   |
| PF3D7_0820000 | Sn2-related CBP activator, putative (SRCAP)                                      | -0.33 | 82.33   | 59.18   |
| PF3D7_0820100 | conserved Plasmodium protein, unknown function                                   | 1.19  | 4.09    | 8.44    |
| PF3D7_0820200 | phosphatidylglycerophosphate synthase (PGPS)                                     | -0.87 | 62.18   | 30.74   |
| PF3D7_0820300 | conserved Plasmodium protein, unknown function                                   | -1.50 | 233.69  | 74.29   |
| PF3D7_0820400 | conserved Plasmodium protein, unknown function                                   | -0.26 | 1.99    | 1.49    |
| PF3D7_0820500 | C-13 antigen                                                                     | -1.06 | 70.86   | 30.61   |
| PF3D7_0820600 | conserved Plasmodium membrane protein, unknown function                          | -0.16 | 4.39    | 3.54    |
| PF3D7_0820700 | 2-oxoglutarate dehydrogenase E1 component (KDH)                                  | 0.87  | 26.40   | 43.47   |
| PF3D7_0820800 | conserved Plasmodium protein, unknown function                                   | 0.28  | 4.18    | 4.59    |
| PF3D7_0820900 | conserved Plasmodium protein, unknown function                                   | -0.63 | 13.32   | 7.78    |
| PF3D7_0821000 | conserved Plasmodium protein, unknown function                                   | -0.91 | 32.88   | 15.76   |
| PF3D7_0821100 | protein kinase 1 (PK1)                                                           | -1.15 | 182.04  | 73.88   |
| PF3D7_0821200 | conserved Plasmodium protein, unknown function                                   | -0.27 | 63.23   | 47.30   |
| PF3D7_0821300 | ATP-dependent RNA helicase prh1, putative                                        | 0.04  | 46.88   | 43.42   |
| PF3D7_0821400 | conserved Plasmodium protein, unknown function                                   | -0.21 | 252.67  | 196.71  |
| PF3D7_0821500 | ribosomal RNA small subunit methyltransferase NEP1, putative (NEP1)              | -0.76 | 72.69   | 38.74   |
| PF3D7_0821600 | clp1-related protein, putative                                                   | -0.85 | 84.76   | 42.55   |
| PF3D7_0821700 | 60S ribosomal protein L22, putative                                              | -0.26 | 496.42  | 374.84  |
| PF3D7_0821800 | protein transport protein SEC61 subunit beta (Sec61-beta)                        | -0.38 | 489.01  | 339.67  |
| PF3D7_0821900 | conserved Plasmodium protein, unknown function                                   | 1.69  | 4.42    | 13.01   |
| PF3D7_0822000 | mitochondrial ribosomal protein L4 precursor, putative                           | 1.45  | 4.82    | 11.91   |
| PF3D7_0822100 | mediator of RNA polymerase II transcription subunit 7, putative (MED7)           | -0.87 | 32.25   | 15.91   |
| PF3D7_0822200 | conserved Plasmodium membrane protein, unknown function                          | -0.96 | 4.07    | 1.88    |
| PF3D7_0822300 | small nuclear ribonucleoprotein G, putative (SNRPG)                              | -1.04 | 48.80   | 21.29   |
| PF3D7_0822400 | conserved Plasmodium protein, unknown function                                   | -0.75 | 9.95    | 5.34    |
| PF3D7_0822500 | dynein light chain 1 (DLC1)                                                      | 0.31  | 8.96    | 10.02   |
| PF3D7_0822600 | protein transport protein SEC23 (SEC23)                                          | -0.35 | 299.97  | 212.38  |
| PF3D7_0822700 | conserved Plasmodium protein, unknown function                                   | -0.46 | 3.50    | 2.30    |
| PF3D7_0822800 | U5 snmp-specific protein, putative                                               | -0.74 | 68.97   | 37.30   |
| PF3D7_0822900 | conserved Plasmodium protein, unknown function                                   | 1.63  | 66.39   | 185.41  |
| PF3D7_0823000 | serine/threonine protein kinase VPS15, putative (VPS15)                          | -0.52 | 5.75    | 3.62    |
| PF3D7_0823100 | RWD domain-containing protein, putative                                          | -0.66 | 73.07   | 41.85   |
| PF3D7_0823200 | RNA-binding protein, putative                                                    | -0.25 | 593.01  | 449.66  |
| PF3D7_0823300 | histone acetyltransferase GCN5 (GCN5)                                            | -0.69 | 128.73  | 71.76   |
| PF3D7_0823400 | alpha/beta hydrolase, putative                                                   | 0.01  | 0.51    | 0.47    |
| PF3D7_0823500 | inner membrane complex protein 1i, putative (IMC1i)                              | 1.22  | 3.04    | 6.43    |
| PF3D7_0823600 | lipoate-protein ligase B (LipB)                                                  | -1.13 | 10.40   | 4.29    |
| PF3D7_0823700 | conserved Plasmodium protein, unknown function                                   | -1.51 | 21.95   | 6.87    |
| PF3D7_0823800 | DnaJ protein, putative                                                           | -1.89 | 75.92   | 18.43   |
| PF3D7_0823900 | dicarboxylate/tricarboxylate carrier (DTC)                                       | 0.70  | 24.60   | 36.10   |

|                 |                                                                         |       |         |         |
|-----------------|-------------------------------------------------------------------------|-------|---------|---------|
| PF3D7_0824000   | conserved Plasmodium protein, unknown function                          | 2.31  | 0.87    | 3.92    |
| PF3D7_0824100   | exonuclease, putative                                                   | 1.72  | 1.71    | 5.11    |
| PF3D7_0824200   | conserved Plasmodium protein, unknown function                          | 0.71  | 2.48    | 3.66    |
| PF3D7_0824300   | GTP-binding protein, putative                                           | 0.87  | 5.79    | 9.57    |
| PF3D7_0824400   | nucleoside transporter 2 (NT2)                                          | -0.41 | 24.62   | 16.76   |
| PF3D7_0824500   | conserved Plasmodium protein, unknown function                          | -0.20 | 11.56   | 9.07    |
| PF3D7_0824600   | Fe-S cluster assembly protein DRE2, putative (DRE2)                     | -0.74 | 55.99   | 30.13   |
| PF3D7_0824700   | lipase maturation factor, putative (LMF1)                               | -0.06 | 4.41    | 3.82    |
| PF3D7_0824800   | conserved Plasmodium membrane protein, unknown function                 | -1.10 | 47.65   | 20.10   |
| PF3D7_0824900   | conserved Plasmodium protein, unknown function                          | -1.09 | 35.54   | 15.09   |
| PF3D7_0825000   | conserved Plasmodium protein, unknown function                          | 0.06  | 15.17   | 14.22   |
| PF3D7_0825100   | conserved Plasmodium protein, unknown function                          | -0.40 | 0.08    | 0.04    |
| PF3D7_0825200   | translation initiation factor IF-3 (IF3a)                               | 0.58  | 6.48    | 8.74    |
| PF3D7_0825300   | conserved protein, unknown function                                     | 0.54  | 11.78   | 15.46   |
| PF3D7_0825400   | conserved Plasmodium protein, unknown function                          | 0.71  | 6.97    | 10.30   |
| PF3D7_0825500   | protein KR11, putative (KR11)                                           | -0.88 | 120.25  | 59.08   |
| PF3D7_0825600   | cytochrome c oxidase assembly protein, putative                         | 0.10  | 15.19   | 14.73   |
| PF3D7_0825700   | conserved Plasmodium protein, unknown function                          | 1.90  | 0.32    | 1.13    |
| PF3D7_0825800   | conserved Plasmodium protein, unknown function                          | 2.41  | 0.70    | 3.43    |
| PF3D7_0825900   | conserved Plasmodium protein, unknown function                          | 1.89  | 0.59    | 1.99    |
| PF3D7_0826000   | conserved Plasmodium protein, unknown function                          | 0.84  | 1.37    | 2.22    |
| PF3D7_0826100   | E3 ubiquitin-protein ligase, putative                                   | -0.21 | 72.12   | 56.27   |
| PF3D7_0826200   | alpha/beta hydrolase, putative                                          | 0.07  | 3.58    | 3.40    |
| PF3D7_0826300   | SPRY domain, putative                                                   | 0.48  | 13.44   | 16.94   |
| PF3D7_0826400   | dehydrodolichyl diphosphate synthetase, putative                        | -0.21 | 11.20   | 8.71    |
| PF3D7_0826500   | ubiquitin conjugation factor E4 B, putative (UBE4B)                     | -0.31 | 65.47   | 47.55   |
| PF3D7_0826600   | SNARE protein, putative (VAMP7)                                         | -0.47 | 10.62   | 6.93    |
| PF3D7_0826700   | receptor for activated c kinase (RACK)                                  | -0.07 | 1208.73 | 1042.20 |
| PF3D7_0826800   | small nucleolar RNA snoR05                                              | -0.30 | 6.17    | 4.47    |
| PF3D7_0826900   | conserved Plasmodium protein, unknown function                          | -0.20 | 18.96   | 14.85   |
| PF3D7_0827000   | ATP-dependent RNA helicase DBP10, putative (DBP10)                      | -0.36 | 122.46  | 85.98   |
| PF3D7_0827100   | translation initiation factor IF-2, putative (IF2c)                     | -0.24 | 13.80   | 10.56   |
| PF3D7_0827200   | conserved Plasmodium protein, unknown function                          | 1.33  | 0.18    | 0.41    |
| PF3D7_0827300   | conserved Plasmodium protein, unknown function                          | -0.29 | 50.34   | 37.16   |
| PF3D7_0827400   | conserved Plasmodium protein, unknown function                          | -0.11 | 8.15    | 6.80    |
| PF3D7_0827500   | apicoplast ribosomal protein L21 precursor, putative                    | 0.07  | 18.30   | 17.39   |
| PF3D7_0827600   | conserved Plasmodium protein, unknown function                          | 0.98  | 8.35    | 14.82   |
| PF3D7_0827700   | magnesium transporter, putative                                         | 1.19  | 0.07    | 0.15    |
| PF3D7_0827800   | SET domain protein, putative (SET3)                                     | -0.47 | 70.51   | 46.06   |
| PF3D7_0827900   | protein disulfide isomerase (PDI8)                                      | 0.09  | 749.23  | 720.09  |
| PF3D7_0828000   | rhomboid protease ROM3 (ROM3)                                           | 0.30  | 1.70    | 1.89    |
| PF3D7_0828100   | conserved Plasmodium protein, unknown function                          | 0.27  | 2.12    | 2.31    |
| PF3D7_0828200   | leucine--tRNA ligase, putative                                          | 0.89  | 7.95    | 13.26   |
| PF3D7_0828300   | conserved Plasmodium protein, unknown function                          | 0.53  | 23.76   | 30.89   |
| PF3D7_0828400   | mitochondrial inner membrane protein OXA1, putative (OXA1)              | 0.32  | 2.76    | 3.11    |
| PF3D7_0828500   | translation initiation factor EIF-2b alpha subunit, putative            | -0.17 | 13.32   | 10.70   |
| PF3D7_0828600   | folate transporter 1 (FT1)                                              | 0.03  | 14.70   | 13.55   |
| PF3D7_0828700   | conserved Plasmodium protein, unknown function                          | 0.01  | 5.26    | 4.78    |
| PF3D7_0828800   | GPI-anchored micronemal antigen (GAMA)                                  | 1.91  | 8.37    | 28.39   |
| PF3D7_0828900   | conserved Plasmodium protein, unknown function                          | 0.49  | 32.19   | 40.69   |
| PF3D7_0829000   | conserved Plasmodium membrane protein, unknown function                 | -1.14 | 20.52   | 8.40    |
| PF3D7_0829100   | conserved protein, unknown function                                     | 0.01  | 91.84   | 83.56   |
| PF3D7_0829200   | prohibitin, putative                                                    | 1.22  | 14.60   | 30.65   |
| PF3D7_0829300   | U6 snRNA-associated Sm-like protein LSM8, putative (LSM8)               | 0.60  | 74.51   | 101.64  |
| PF3D7_0829400   | prolyl 4-hydroxylase subunit alpha, putative                            | 0.73  | 10.69   | 15.98   |
| PF3D7_0829500   | conserved Plasmodium protein, unknown function                          | 0.29  | 0.51    | 0.56    |
| PF3D7_0829600   | early transcribed membrane protein 8 (ETRAPM8)                          | 1.40  | 2.97    | 7.14    |
| PF3D7_0829700   | unspecified product                                                     | -0.75 | 1.18    | 0.62    |
| PF3D7_0829800   | unspecified product                                                     | 1.52  | 60.65   | 156.94  |
| PF3D7_0829900   | unspecified product                                                     | 1.25  | 75.34   | 161.22  |
| PF3D7_0830000   | 5.8S ribosomal RNA                                                      | 2.19  | 0.00    | 0.62    |
| PF3D7_0830100   | unspecified product                                                     | -0.04 | 2.18    | 1.91    |
| PF3D7_0830200   | 28S ribosomal RNA                                                       | 2.79  | 0.36    | 2.28    |
| PF3D7_0830300   | sporozoite invasion-associated protein 2 (SIAP2)                        | -0.63 | 5.51    | 3.20    |
| PF3D7_0830400   | conserved Plasmodium protein, unknown function                          | -0.13 | 563.18  | 464.44  |
| PF3D7_0830500   | tryptophan/threonine-rich antigen (TryThrA)                             | 0.77  | 610.25  | 936.20  |
| PF3D7_0830600   | Plasmodium exported protein (PHISTe), unknown function                  | -0.32 | 649.54  | 471.02  |
| PF3D7_0830700   | Plasmodium exported protein (hyp9), unknown function                    | -0.40 | 57.55   | 39.22   |
| PF3D7_0830800   | surface-associated interspersed protein 8.2 (SURFIN 8.2) (SURF8.2)      | -0.29 | 9.77    | 7.20    |
| PF3D7_0830900   | Plasmodium exported protein, unknown function                           | 0.70  | 32.19   | 47.13   |
| PF3D7_0831000   | Plasmodium exported protein (PHISTb), unknown function (GEXP09)         | -2.09 | 14.99   | 3.16    |
| PF3D7_0831100   | surface-associated interspersed protein 8.1 (SURFIN 8.1) (SURF8.1)      | -0.23 | 2.39    | 1.84    |
| PF3D7_0831200   | DnaJ protein, putative                                                  | -0.80 | 98.50   | 50.99   |
| PF3D7_0831300   | Plasmodium exported protein, unknown function (GEXP13)                  | 1.50  | 5.19    | 13.22   |
| PF3D7_0831400   | Plasmodium exported protein, unknown function                           | 1.94  | 11.83   | 41.15   |
| PF3D7_0831500   | Plasmodium exported protein (PHIST), unknown function                   | -1.35 | 599.28  | 211.84  |
| PF3D7_0831600   | cytoadherence linked asexual protein 8 (CLAG8)                          | -0.89 | 44.37   | 21.65   |
| PF3D7_0831700   | heat shock protein 70 (HSP70-x)                                         | -0.55 | 5185.87 | 3186.14 |
| PF3D7_0831750   | Plasmodium exported protein (PHISTa), unknown function, pseudogene      | -1.32 | 3.00    | 1.06    |
| PF3D7_0831800   | histidine-rich protein II (HRPII)                                       | -1.03 | 9529.46 | 4222.93 |
| PF3D7_0831900   | Plasmodium exported protein (PHIST), unknown function, pseudogene       | -1.37 | 216.84  | 75.49   |
| PF3D7_0832000   | stevor                                                                  | 3.48  | 2.28    | 23.28   |
| PF3D7_0832100   | rifin, pseudogene (RIF)                                                 | 1.88  | 2.42    | 8.08    |
| PF3D7_0832200.1 | Plasmodium exported protein (PHISTa-like), unknown function             | -0.59 | 66.44   | 39.69   |
| PF3D7_0832200.2 | Plasmodium exported protein (PHISTa-like), unknown function             | -0.59 | 64.99   | 38.85   |
| PF3D7_0832300   | Plasmodium exported protein (PHISTa-like), unknown function             | 1.57  | 0.11    | 0.35    |
| PF3D7_0832400   | stevor                                                                  | 1.51  | 0.12    | 0.35    |
| PF3D7_0832500   | rifin (RIF)                                                             | 1.08  | 0.14    | 0.28    |
| PF3D7_0832600   | stevor                                                                  | -2.13 | 0.09    | 0.00    |
| PF3D7_0832700   | Plasmodium exported protein (PHISTa-like), unknown function, pseudogene | -2.11 | 1.80    | 0.35    |
| PF3D7_0832800   | rifin (RIF)                                                             | 1.41  | 0.05    | 0.15    |
| PF3D7_0832900   | stevor                                                                  | 2.65  | 0.02    | 0.25    |
| PF3D7_0833000   | rifin (RIF)                                                             | 3.36  | 0.00    | 0.17    |
| PF3D7_0833100   | rifin (RIF)                                                             | -0.70 | 0.24    | 0.12    |
| PF3D7_0833200   | rifin (RIF)                                                             | -1.40 | 0.29    | 0.09    |
| PF3D7_0833300   | erythrocyte membrane protein 1 (PfEMP1), exon 2, pseudogene             | 0.93  | 0.04    | 0.08    |
| PF3D7_0833400   | rifin (RIF)                                                             | 0.19  | 0.35    | 0.36    |
| PF3D7_0833500   | erythrocyte membrane protein 1, PfEMP1 (VAR)                            | 0.48  | 1.99    | 2.51    |

|                 |                                                                    |       |         |         |
|-----------------|--------------------------------------------------------------------|-------|---------|---------|
| PF3D7_0900100   | erythrocyte membrane protein 1, PfEMP1 (VAR)                       | 1.14  | 2.29    | 4.57    |
| PF3D7_0900200   | rifin (RIF)                                                        | 0.98  | 7.33    | 13.01   |
| PF3D7_0900300   | rifin (RIF)                                                        | -0.72 | 0.95    | 0.51    |
| PF3D7_0900400   | rifin (RIF)                                                        | 2.71  | 0.69    | 4.20    |
| PF3D7_0900500   | rifin (RIF)                                                        | 2.11  | 1.89    | 7.45    |
| PF3D7_0900600   | rifin (RIF)                                                        | -0.26 | 1.03    | 0.77    |
| PF3D7_0900700   | rifin (RIF)                                                        | 0.19  | 0.08    | 0.08    |
| PF3D7_0900800   | erythrocyte membrane protein 1 (PfEMP1), exon 2, pseudogene (VAR)  | 1.29  | 0.10    | 0.24    |
| PF3D7_0900900   | stevor                                                             | 2.51  | 0.00    | 0.10    |
| PF3D7_0901000   | rifin (RIF)                                                        | 1.19  | 0.00    | 0.02    |
| PF3D7_0901100   | rifin (RIF)                                                        | 1.77  | 0.00    | 0.04    |
| PF3D7_0901200   | Plasmodium exported protein, unknown function, fragment            | -1.81 | 0.32    | 0.00    |
| PF3D7_0901300   | rifin (RIF)                                                        | 2.15  | 0.16    | 0.69    |
| PF3D7_0901400   | rifin (RIF)                                                        | 3.00  | 0.00    | 0.13    |
| PF3D7_0901500   | rifin (RIF)                                                        | 2.12  | 0.57    | 2.31    |
| PF3D7_0901600   | stevor                                                             | 2.36  | 0.17    | 0.88    |
| PF3D7_0901700   | Plasmodium exported protein (hyp5), unknown function               | 0.43  | 18.54   | 22.59   |
| PF3D7_0901800   | Plasmodium exported protein, unknown function                      | 1.22  | 8.10    | 17.00   |
| PF3D7_0901900   | probable protein, unknown function                                 | -1.30 | 8.10    | 2.96    |
| PF3D7_0902000   | serine/threonine protein kinase, FIKK family (FIKK9.1)             | -0.07 | 34.60   | 29.72   |
| PF3D7_0902100   | serine/threonine protein kinase, FIKK family (FIKK9.2)             | 0.31  | 11.59   | 12.93   |
| PF3D7_0902200   | serine/threonine protein kinase, FIKK family (FIKK9.3)             | -0.78 | 61.23   | 32.10   |
| PF3D7_0902300   | serine/threonine protein kinase, FIKK family (FIKK9.4)             | -1.01 | 248.49  | 111.18  |
| PF3D7_0902400   | serine/threonine protein kinase, FIKK family (FIKK9.5)             | -0.56 | 11.51   | 7.05    |
| PF3D7_0902500   | serine/threonine protein kinase, FIKK family (FIKK9.6)             | -0.42 | 303.09  | 204.22  |
| PF3D7_0902600   | serine/threonine protein kinase, FIKK family (FIKK9.7)             | -1.23 | 31.04   | 11.92   |
| PF3D7_0902700   | Plasmodium exported protein (PHISTb), unknown function, pseudogene | 0.94  | 9.03    | 15.66   |
| PF3D7_0902800   | serine repeat antigen 9 (SERA9)                                    | 0.47  | 18.98   | 23.66   |
| PF3D7_0902900   | conserved Plasmodium protein, unknown function                     | 1.73  | 1.59    | 4.92    |
| PF3D7_0903000   | conserved protein, unknown function                                | 0.58  | 10.14   | 13.71   |
| PF3D7_0903100   | protein RER1, putative (RER1)                                      | -1.80 | 46.50   | 12.05   |
| PF3D7_0903200   | ras-related protein RAB7 (RAB7)                                    | 0.72  | 111.49  | 166.07  |
| PF3D7_0903300   | conserved Plasmodium membrane protein, unknown function            | -0.22 | 28.51   | 22.11   |
| PF3D7_0903400   | DEAD/DEAH box helicase, putative                                   | -1.19 | 202.10  | 80.05   |
| PF3D7_0903500   | conserved Plasmodium protein, unknown function                     | -0.16 | 104.58  | 84.16   |
| PF3D7_0903600.1 | conserved Plasmodium protein, unknown function                     | 1.30  | 39.51   | 87.91   |
| PF3D7_0903600.2 | conserved Plasmodium protein, unknown function                     | 1.26  | 17.22   | 37.25   |
| PF3D7_0903700   | alpha tubulin 1                                                    | 0.28  | 121.78  | 133.56  |
| PF3D7_0903800   | LCCL domain-containing protein (CCp4)                              | 0.63  | 0.59    | 0.83    |
| PF3D7_0903900   | 60S ribosomal protein L32 (RPL32)                                  | -0.14 | 1473.91 | 1208.32 |
| PF3D7_0904000   | GTPase-activating protein, putative                                | -0.84 | 306.25  | 154.67  |
| PF3D7_0904100   | AP-4 complex subunit epsilon, putative                             | -0.21 | 40.25   | 31.34   |
| PF3D7_0904200   | conserved Plasmodium protein, unknown function                     | 2.61  | 1.07    | 6.03    |
| PF3D7_0904300   | conserved protein, unknown function                                | 0.90  | 0.36    | 0.60    |
| PF3D7_0904400   | signal peptidase complex subunit 3, putative (SPC3)                | -0.32 | 20.23   | 14.61   |
| PF3D7_0904500   | prefoldin subunit 4, putative                                      | -0.09 | 11.31   | 9.57    |
| PF3D7_0904600   | ubiquitin specific protease, putative                              | -0.48 | 69.75   | 45.15   |
| PF3D7_0904700   | bacterial histone-like protein (HU)                                | -0.76 | 22.01   | 11.68   |
| PF3D7_0904800   | replication protein A1, small fragment (RPA1)                      | -0.12 | 53.37   | 44.38   |
| PF3D7_0904900   | copper-transporting ATPase (CuTP)                                  | 0.31  | 26.89   | 30.10   |
| PF3D7_0905000   | conserved Plasmodium protein, unknown function                     | -1.48 | 3.18    | 1.01    |
| PF3D7_0905100   | nucleoporin NUP100/NSP100, putative (NUP100)                       | -0.91 | 48.83   | 23.37   |
| PF3D7_0905200   | mitochondrial carrier protein, putative                            | -1.08 | 40.44   | 17.21   |
| PF3D7_0905300   | dynein heavy chain, putative                                       | 0.99  | 0.78    | 1.41    |
| PF3D7_0905400   | high molecular weight rhopty protein 3 (RhopH3)                    | -0.07 | 630.58  | 543.04  |
| PF3D7_0905500   | conserved Plasmodium protein, unknown function                     | 0.30  | 17.55   | 19.45   |
| PF3D7_0905600   | WD repeat-containing protein 66, putative (WDR66)                  | 0.29  | 0.32    | 0.36    |
| PF3D7_0905700.1 | autophagy-related protein 3, putative (ATG3)                       | 0.20  | 25.53   | 26.36   |
| PF3D7_0905700.2 | autophagy-related protein 3, putative (ATG3)                       | 0.21  | 25.37   | 26.45   |
| PF3D7_0905700.3 | autophagy-related protein 3, putative                              | -0.17 | 19.87   | 15.91   |
| PF3D7_0905800   | conserved Plasmodium protein, unknown function                     | -1.15 | 34.19   | 13.91   |
| PF3D7_0905900   | coatamer subunit beta, putative (SEC27)                            | -1.18 | 67.46   | 26.86   |
| PF3D7_0906000   | exoribonuclease II (RNaseII)                                       | 0.34  | 3.51    | 4.00    |
| PF3D7_0906100   | vacuolar protein sorting-associated protein 46, putative (VPS46)   | 1.24  | 18.13   | 38.78   |
| PF3D7_0906200   | conserved Plasmodium protein, unknown function                     | -1.08 | 5.70    | 2.43    |
| PF3D7_0906300   | MaF-like protein, putative                                         | -1.04 | 30.14   | 13.20   |
| PF3D7_0906400   | dynein light intermediate chain 2, cytosolic                       | -0.23 | 3.37    | 2.58    |
| PF3D7_0906500   | arginase                                                           | -0.17 | 113.50  | 91.04   |
| PF3D7_0906600   | zinc finger protein, putative                                      | -1.35 | 260.87  | 92.39   |
| PF3D7_0906700   | leucine-rich repeat protein (LRR9)                                 | -1.17 | 22.23   | 8.92    |
| PF3D7_0906800   | probable protein, unknown function                                 | -1.10 | 6.10    | 2.57    |
| PF3D7_0906890   | conserved Plasmodium protein, unknown function                     | -1.85 | 18.19   | 4.50    |
| PF3D7_0906910   | tubulin-specific chaperone, putative                               | -0.53 | 53.26   | 26.44   |
| PF3D7_0907000   | conserved Plasmodium protein, unknown function                     | -0.68 | 47.10   | 33.30   |
| PF3D7_0907100   | conserved Plasmodium protein, unknown function                     | 0.37  | 2.79    | 3.25    |
| PF3D7_0907200   | GTPase-activating protein, putative                                | -0.96 | 112.94  | 52.40   |
| PF3D7_0907300   | conserved Plasmodium protein, unknown function                     | 0.21  | 13.95   | 14.58   |
| PF3D7_0907400   | ATP-dependent protease ATPase subunit ClpY (ClpY)                  | -0.76 | 109.51  | 58.23   |
| PF3D7_0907500   | conserved Plasmodium protein, unknown function                     | 0.89  | 21.60   | 36.19   |
| PF3D7_0907600   | translation initiation factor SUI1, putative                       | -0.03 | 48.98   | 43.20   |
| PF3D7_0907700   | subunit of proteasome activator complex, putative                  | -0.73 | 492.07  | 268.44  |
| PF3D7_0907800   | apicoplast ribosomal protein L35 precursor, putative               | 0.42  | 44.10   | 53.14   |
| PF3D7_0907900   | peptide deformylase (PDF)                                          | 0.73  | 18.02   | 27.06   |
| PF3D7_0908000   | P1 nuclease, putative                                              | -0.84 | 37.58   | 18.94   |
| PF3D7_0908100   | conserved Plasmodium membrane protein, unknown function            | 0.03  | 2.27    | 2.09    |
| PF3D7_0908200   | conserved Plasmodium protein, unknown function                     | 0.44  | 8.68    | 10.65   |
| PF3D7_0908300.1 | conserved Plasmodium membrane protein, unknown function            | 1.12  | 6.44    | 12.62   |
| PF3D7_0908300.2 | conserved Plasmodium membrane protein, unknown function            | 1.14  | 6.59    | 13.14   |
| PF3D7_0908400   | conserved Plasmodium protein, unknown function                     | -1.49 | 15.81   | 5.05    |
| PF3D7_0908500   | conserved Plasmodium protein, unknown function                     | 0.61  | 9.35    | 12.85   |
| PF3D7_0908600   | ribosomal RNA methyltransferase, putative                          | -0.46 | 35.26   | 23.06   |
| PF3D7_0908700   | tRNA pseudouridine synthase, putative                              | -0.42 | 16.20   | 10.94   |
| PF3D7_0908800   | transporter, putative                                              | -0.46 | 38.60   | 25.30   |
| PF3D7_0908900   | conserved Plasmodium protein, unknown function                     | 0.03  | 7.94    | 7.33    |
| PF3D7_0909000   | conserved Plasmodium protein, unknown function                     | 0.38  | 1.72    | 2.02    |
| PF3D7_0909100   | conserved Plasmodium membrane protein, unknown function            | 0.33  | 3.68    | 4.17    |
| PF3D7_0909200   | GDP-fucose protein O-fucosyltransferase 2, putative (POFUT2)       | -0.33 | 0.83    | 0.59    |
| PF3D7_0909300   | apoptosis-related protein (ARP)                                    | 0.10  | 163.30  | 157.84  |

|                 |                                                                                        |       |         |         |
|-----------------|----------------------------------------------------------------------------------------|-------|---------|---------|
| PF3D7_0909400   | exoribonuclease, putative                                                              | -0.92 | 124.47  | 59.23   |
| PF3D7_0909500   | subpellicular microtubule protein 1, putative (SPM1)                                   | 0.80  | 20.89   | 32.92   |
| PF3D7_0909600   | conserved Plasmodium protein, unknown function                                         | -0.25 | 18.08   | 13.75   |
| PF3D7_0909700   | FHA domain protein, putative                                                           | -1.81 | 150.31  | 38.59   |
| PF3D7_0909800   | small nuclear ribonucleoprotein Sm D3, putative (SNRPD3)                               | -0.29 | 153.22  | 112.85  |
| PF3D7_0909900   | helicase with Zn-finger motif, putative                                                | -0.29 | 44.92   | 33.11   |
| PF3D7_0910000   | SET domain protein, putative (SET4)                                                    | 0.26  | 2.20    | 2.38    |
| PF3D7_0910100   | Ran-binding protein, putative                                                          | -0.67 | 73.09   | 41.30   |
| PF3D7_0910200   | conserved Plasmodium protein, unknown function                                         | -0.21 | 38.18   | 29.76   |
| PF3D7_0910300   | conserved Plasmodium protein, unknown function                                         | -0.73 | 25.64   | 13.94   |
| PF3D7_0910400   | selenide water dikinase, putative                                                      | -0.02 | 9.67    | 8.62    |
| PF3D7_0910500   | DNA repair protein REV1, putative                                                      | -1.05 | 41.00   | 17.80   |
| PF3D7_0910600   | SNARE protein (YKT6.1)                                                                 | 0.34  | 17.06   | 19.46   |
| PF3D7_0910700   | actin-like protein, putative (ALP5a)                                                   | -0.06 | 3.25    | 2.81    |
| PF3D7_0910800   | cytosolic Fe-S cluster assembly factor NBP35, putative (NBP35)                         | 0.08  | 32.67   | 31.22   |
| PF3D7_0910900   | DNA primase large subunit, putative                                                    | 0.55  | 12.64   | 16.72   |
| PF3D7_0911000   | phosphatidylinositol N-acetylglucosaminyltransferase, putative                         | 0.60  | 11.80   | 16.11   |
| PF3D7_0911100   | conserved Plasmodium protein, unknown function                                         | 1.27  | 14.41   | 31.37   |
| PF3D7_0911200   | conserved Plasmodium protein, unknown function                                         | -1.21 | 5.43    | 2.09    |
| PF3D7_0911300   | cysteine repeat modular protein 1 (CRMP1)                                              | 0.62  | 0.26    | 0.36    |
| PF3D7_0911400   | conserved Plasmodium protein, unknown function                                         | -0.67 | 11.31   | 6.40    |
| PF3D7_0911500.1 | conserved Plasmodium protein, unknown function                                         | -1.22 | 2.42    | 0.91    |
| PF3D7_0911500.2 | conserved Plasmodium protein, unknown function                                         | -1.18 | 2.34    | 0.90    |
| PF3D7_0911600   | conserved Plasmodium protein, unknown function                                         | 0.79  | 11.05   | 17.20   |
| PF3D7_0911700   | GTP-binding protein, putative                                                          | 0.51  | 16.22   | 20.87   |
| PF3D7_0911800   | conserved Plasmodium protein, unknown function                                         | -0.54 | 22.29   | 13.80   |
| PF3D7_0911900   | falstatin (ICP)                                                                        | -0.12 | 416.79  | 346.38  |
| PF3D7_0912000   | conserved Plasmodium protein, unknown function                                         | -1.48 | 19.62   | 6.35    |
| PF3D7_0912100   | zinc finger protein, putative                                                          | -0.51 | 42.58   | 27.06   |
| PF3D7_0912200   | conserved Plasmodium membrane protein, unknown function                                | -0.83 | 11.87   | 6.04    |
| PF3D7_0912400   | alkaline phosphatase, putative                                                         | -0.72 | 110.11  | 60.28   |
| PF3D7_0912500   | conserved Plasmodium protein, unknown function                                         | 0.24  | 196.64  | 209.21  |
| PF3D7_0912600   | conserved Plasmodium protein, unknown function                                         | -0.13 | 1.95    | 1.61    |
| PF3D7_0912700   | conserved Plasmodium protein, unknown function                                         | 0.15  | 6.42    | 6.43    |
| PF3D7_0912800   | tRNA (adenine(58)-N(1))-methyltransferase non-catalytic subunit TRM6, putative (GCD10) | -0.92 | 50.63   | 24.19   |
| PF3D7_0912900   | 26S proteasome regulatory subunit RPN8, putative (RPN8)                                | -0.35 | 159.88  | 113.50  |
| PF3D7_0913000   | conserved protein, unknown function                                                    | -0.03 | 206.54  | 182.01  |
| PF3D7_0913100   | conserved Plasmodium protein, unknown function                                         | 0.07  | 1.97    | 1.87    |
| PF3D7_0913200   | elongation factor 1-beta (EF-1beta)                                                    | -0.19 | 522.50  | 412.16  |
| PF3D7_0913300   | conserved Plasmodium protein, unknown function                                         | -1.15 | 156.86  | 63.96   |
| PF3D7_0913400   | conserved Plasmodium protein, unknown function                                         | 0.75  | 6.80    | 10.31   |
| PF3D7_0913500   | protease, putative                                                                     | -0.51 | 16.30   | 10.30   |
| PF3D7_0913600   | conserved Plasmodium protein, unknown function                                         | 0.28  | 6.27    | 6.88    |
| PF3D7_0913700   | conserved Plasmodium protein, unknown function                                         | -0.21 | 31.83   | 24.83   |
| PF3D7_0913800   | conserved Plasmodium protein, unknown function                                         | 1.66  | 15.53   | 44.30   |
| PF3D7_0913900   | arginine-tRNA ligase, putative                                                         | -0.92 | 12.28   | 5.84    |
| PF3D7_0914000   | pseudouridylylase, putative                                                            | -0.47 | 22.27   | 14.48   |
| PF3D7_0914100   | conserved Plasmodium protein, unknown function                                         | 1.55  | 15.53   | 40.92   |
| PF3D7_0914200   | phospholipid or glycerol acyltransferase, putative                                     | -0.94 | 117.74  | 55.51   |
| PF3D7_0914300   | met-10+ like protein, putative                                                         | -0.81 | 53.62   | 27.61   |
| PF3D7_0914400   | conserved Plasmodium protein, unknown function                                         | -0.16 | 38.86   | 31.38   |
| PF3D7_0914500   | conserved Plasmodium protein, unknown function                                         | -0.03 | 19.24   | 16.97   |
| PF3D7_0914600   | zinc binding protein, putative                                                         | -0.34 | 34.73   | 24.74   |
| PF3D7_0914700   | transporter, putative                                                                  | -2.50 | 443.39  | 70.83   |
| PF3D7_0914800   | GINS complex subunit Psf3, putative                                                    | -0.61 | 22.83   | 13.52   |
| PF3D7_0914900   | BSD-domain protein, putative                                                           | -0.44 | 33.73   | 22.36   |
| PF3D7_0915000   | type II NADH:ubiquinone oxidoreductase (NDH2)                                          | 0.45  | 19.14   | 23.52   |
| PF3D7_0915100   | SUMO-conjugating enzyme UBC9 (UBC9)                                                    | -0.19 | 125.86  | 99.46   |
| PF3D7_0915200   | ribonuclease H2 subunit C, putative                                                    | -1.00 | 7.84    | 3.52    |
| PF3D7_0915300   | conserved Plasmodium protein, unknown function                                         | 0.38  | 3.92    | 4.61    |
| PF3D7_0915400   | 6-phosphofructokinase (PFK9)                                                           | -0.36 | 637.29  | 448.41  |
| PF3D7_0915500   | conserved Plasmodium protein, unknown function                                         | -0.63 | 0.98    | 0.57    |
| PF3D7_0915600   | conserved Plasmodium protein, unknown function                                         | -0.72 | 47.55   | 26.08   |
| PF3D7_0915700   | conserved Plasmodium protein, unknown function                                         | 0.62  | 17.76   | 24.73   |
| PF3D7_0915800   | glycolipid transfer protein, putative (GLTP)                                           | 0.13  | 3.46    | 3.42    |
| PF3D7_0915900   | conserved Plasmodium protein, unknown function                                         | -0.93 | 62.64   | 29.60   |
| PF3D7_0916000   | sugar transporter, putative                                                            | 0.38  | 25.09   | 29.52   |
| PF3D7_0916100   | thioredoxin 3 (TRX3)                                                                   | -0.17 | 20.05   | 16.03   |
| PF3D7_0916200   | conserved Plasmodium protein, unknown function                                         | -0.25 | 10.70   | 8.11    |
| PF3D7_0916300   | conserved Plasmodium protein, unknown function                                         | 0.78  | 4.28    | 6.65    |
| PF3D7_0916400   | conserved Plasmodium protein, unknown function                                         | -0.56 | 7.83    | 4.80    |
| PF3D7_0916500   | ubiquitin fusion degradation protein 1 (UFD1)                                          | 1.00  | 11.09   | 20.06   |
| PF3D7_0916600   | methyltransferase, putative                                                            | -0.82 | 38.72   | 19.72   |
| PF3D7_0916700   | RNA-binding protein musashi, putative (HoMu)                                           | -0.80 | 887.77  | 459.30  |
| PF3D7_0916800   | conserved Plasmodium protein, unknown function                                         | 0.02  | 39.87   | 36.39   |
| PF3D7_0916900   | conserved Plasmodium protein, unknown function                                         | -1.41 | 81.10   | 27.48   |
| PF3D7_0917000   | conserved Plasmodium protein, unknown function                                         | -0.32 | 16.73   | 12.07   |
| PF3D7_0917100   | N-glycosylase/DNA lyase, putative (OGG1)                                               | 0.26  | 15.85   | 17.14   |
| PF3D7_0917200   | conserved Plasmodium membrane protein, unknown function                                | 0.66  | 3.01    | 4.30    |
| PF3D7_0917300   | conserved Plasmodium membrane protein, unknown function                                | 0.27  | 12.69   | 13.80   |
| PF3D7_0917400   | conserved Plasmodium protein, unknown function                                         | -0.20 | 5.18    | 4.06    |
| PF3D7_0917500   | conserved Plasmodium protein, unknown function                                         | 0.33  | 14.93   | 16.97   |
| PF3D7_0917600   | pre-mRNA-splicing factor ATP-dependent RNA helicase PRP43, putative (PRP43)            | 0.15  | 98.37   | 98.53   |
| PF3D7_0917700   | XPA binding protein 1, putative                                                        | -1.26 | 10.21   | 3.83    |
| PF3D7_0917800   | conserved Plasmodium protein, unknown function                                         | -1.70 | 13.47   | 3.73    |
| PF3D7_0917900   | heat shock protein 70 (HSP70-2)                                                        | 0.13  | 1904.55 | 1882.77 |
| PF3D7_0918000   | glideosome-associated protein 50 (GAP50)                                               | 0.53  | 236.67  | 307.45  |
| PF3D7_0918100   | cytochrome b5-like heme/steroid binding protein, putative                              | 0.10  | 122.54  | 118.78  |
| PF3D7_0918200   | 50S ribosomal protein L3, apicoplast, putative                                         | 0.11  | 61.28   | 59.51   |
| PF3D7_0918300   | eukaryotic translation initiation factor 3 subunit F, putative (EIF3F)                 | -0.38 | 148.80  | 103.46  |
| PF3D7_0918400   | conserved Plasmodium protein, unknown function                                         | 1.22  | 0.87    | 1.82    |
| PF3D7_0918500   | telomerase RNA (TR)                                                                    | 0.96  | 14.15   | 24.80   |
| PF3D7_0918600   | ATP-dependent DNA helicase Q1 (RECQ1)                                                  | -0.33 | 7.77    | 5.57    |
| PF3D7_0918700   | conserved Plasmodium protein, unknown function                                         | 0.04  | 48.84   | 45.37   |
| PF3D7_0918800   | dihydrouridine synthase, putative                                                      | -0.51 | 57.63   | 36.58   |
| PF3D7_0918900   | gamma-glutamylcysteine synthetase (gammaGCS)                                           | -0.17 | 132.29  | 105.85  |
| PF3D7_0919000   | nucleosome assembly protein (NAPS)                                                     | 0.00  | 1332.34 | 1201.17 |
| PF3D7_0919100   | DnaJ protein, putative                                                                 | -0.16 | 201.11  | 162.89  |

|                 |                                                                          |       |         |         |
|-----------------|--------------------------------------------------------------------------|-------|---------|---------|
| PF3D7_0919200   | PPPDE peptidase, putative                                                | 1.78  | 10.11   | 31.44   |
| PF3D7_0919300   | thioredoxin-like protein 1, putative (TrxL1)                             | 2.38  | 8.51    | 40.12   |
| PF3D7_0919400   | protein disulfide isomerase (PD19)                                       | 0.27  | 27.61   | 29.96   |
| PF3D7_0919500   | sugar transporter, putative                                              | 0.25  | 2.44    | 2.62    |
| PF3D7_0919600   | dolichyl-diphosphooligosaccharide--protein glycosyltransferase, putative | -0.30 | 4.03    | 2.96    |
| PF3D7_0919700   | pyridoxal 5'-phosphate dependent enzyme class III, putative              | -0.77 | 19.94   | 10.55   |
| PF3D7_0919800   | TLD domain-containing protein                                            | 0.50  | 40.49   | 51.52   |
| PF3D7_0919900   | regulator of chromosome condensation, putative                           | 0.23  | 32.15   | 34.04   |
| PF3D7_0920000   | long chain fatty acid elongation enzyme, putative (ELO3)                 | 0.88  | 5.39    | 8.94    |
| PF3D7_0920100   | chaperone, putative                                                      | 0.10  | 15.35   | 14.80   |
| PF3D7_0920200   | CS domain protein, putative                                              | 0.28  | 12.93   | 14.14   |
| PF3D7_0920300   | conserved Plasmodium protein, unknown function                           | -1.03 | 2.18    | 0.94    |
| PF3D7_0920400   | conserved Plasmodium protein, unknown function                           | -0.73 | 7.51    | 4.08    |
| PF3D7_0920500   | ADP-ribosylation factor, putative                                        | 1.19  | 30.61   | 62.85   |
| PF3D7_0920600   | conserved Plasmodium protein, unknown function                           | 0.08  | 5.34    | 5.09    |
| PF3D7_0920700   | conserved Plasmodium protein, unknown function                           | 0.87  | 33.83   | 55.86   |
| PF3D7_0920800   | inosine-5'-monophosphate dehydrogenase (IMPDH)                           | -0.64 | 311.10  | 179.49  |
| PF3D7_0920900   | U4/U6 snRNA-associated-splicing factor, putative (PRP24)                 | -0.55 | 44.13   | 27.21   |
| PF3D7_0921000.1 | ubiquitin-conjugating enzyme, putative                                   | 0.39  | 54.77   | 64.55   |
| PF3D7_0921000.2 | ubiquitin-conjugating enzyme, putative                                   | 0.45  | 48.81   | 60.07   |
| PF3D7_0921100   | conserved Plasmodium protein, unknown function                           | -0.05 | 4.53    | 3.94    |
| PF3D7_0921200   | conserved Plasmodium membrane protein, unknown function                  | -1.06 | 32.37   | 14.04   |
| PF3D7_0921300   | conserved Plasmodium protein, unknown function                           | -0.23 | 8.62    | 6.60    |
| PF3D7_0921400   | NifU-like scaffold protein, putative (NifU)                              | 0.56  | 2.02    | 2.69    |
| PF3D7_0921500   | conserved Plasmodium protein, unknown function                           | 1.00  | 0.48    | 0.87    |
| PF3D7_0921600   | tetratricopeptide repeat family protein, putative                        | -0.76 | 15.68   | 8.34    |
| PF3D7_0921700   | conserved Plasmodium protein, unknown function                           | 0.16  | 11.04   | 11.14   |
| PF3D7_0921800   | ribosome production factor 1, putative (RPF1)                            | -1.17 | 79.48   | 31.85   |
| PF3D7_0921900   | conserved Plasmodium protein, unknown function                           | 0.19  | 264.75  | 272.17  |
| PF3D7_0922000   | dynein intermediate chain, putative                                      | 1.37  | 0.75    | 1.77    |
| PF3D7_0922100   | ubiquitin-like protein, putative                                         | -0.48 | 230.55  | 148.73  |
| PF3D7_0922200   | S-adenosylmethionine synthetase (SAMS)                                   | -0.21 | 1425.39 | 1114.07 |
| PF3D7_0922300   | conserved Plasmodium protein, unknown function                           | 1.11  | 1.04    | 2.04    |
| PF3D7_0922400   | para-aminobenzoic acid synthetase (pBAS)                                 | 0.35  | 2.35    | 2.70    |
| PF3D7_0922500   | phosphoglycerate kinase (PGK)                                            | -0.26 | 710.75  | 534.15  |
| PF3D7_0922600   | glutamine synthetase, putative                                           | -1.14 | 423.11  | 173.54  |
| PF3D7_0922700   | pre-mRNA-splicing factor 18, putative (PRP18)                            | 0.36  | 57.82   | 66.99   |
| PF3D7_0922800   | conserved Plasmodium protein, unknown function                           | 0.04  | 5.42    | 5.02    |
| PF3D7_0922900   | 3-oxoacyl-[acyl-carrier-protein] reductase (FabG)                        | 1.70  | 3.44    | 10.12   |
| PF3D7_0923000   | DNA-directed RNA polymerase II subunit RPB3, putative (RPB3)             | -0.46 | 60.18   | 39.57   |
| PF3D7_0923100   | OTU-like cysteine protease, putative                                     | -1.37 | 6.19    | 2.13    |
| PF3D7_0923200   | flavodoxin-like protein (CPR)                                            | -0.54 | 65.93   | 40.96   |
| PF3D7_0923300   | perforin-like protein 3 (PLP3)                                           | -0.40 | 13.54   | 9.23    |
| PF3D7_0923400   | conserved Plasmodium protein, unknown function                           | -0.60 | 34.11   | 20.31   |
| PF3D7_0923500   | cyclin-dependent kinases regulatory subunit, putative                    | -0.28 | 6.88    | 5.12    |
| PF3D7_0923600   | lipoate-protein ligase 2 (LipL2)                                         | -0.11 | 2.85    | 2.37    |
| PF3D7_0923700   | conserved protein, unknown function                                      | 2.89  | 0.24    | 1.75    |
| PF3D7_0923800.1 | thioredoxin reductase (TRXR)                                             | 1.06  | 29.76   | 55.95   |
| PF3D7_0923800.2 | thioredoxin reductase (TRXR)                                             | 1.06  | 33.23   | 62.63   |
| PF3D7_0923900   | RNA-binding protein, putative                                            | 0.20  | 187.18  | 193.77  |
| PF3D7_0924000   | patatin-like phospholipase, putative                                     | -0.69 | 73.40   | 41.11   |
| PF3D7_0924100   | conserved Plasmodium protein, unknown function                           | -0.23 | 11.32   | 8.73    |
| PF3D7_0924200   | conserved Plasmodium protein, unknown function                           | -0.70 | 9.51    | 5.29    |
| PF3D7_0924300   | thiamine pyrophosphokinase (TPK)                                         | 0.76  | 5.98    | 9.13    |
| PF3D7_0924400   | conserved Plasmodium protein, unknown function                           | -0.15 | 97.32   | 79.24   |
| PF3D7_0924500   | conserved Plasmodium membrane protein, unknown function                  | -0.01 | 11.41   | 10.24   |
| PF3D7_0924600   | conserved Plasmodium protein, unknown function                           | -0.04 | 7.20    | 6.31    |
| PF3D7_0924700   | splicing factor 3A subunit 3, putative (SF3A3)                           | -0.72 | 55.96   | 30.59   |
| PF3D7_0924800   | telomeric repeat binding factor 1, putative (TRF1)                       | -0.45 | 1.14    | 0.72    |
| PF3D7_0924900   | alpha-tubulin N-acetyltransferase, putative                              | 0.04  | 1.61    | 1.49    |
| PF3D7_0925000   | conserved Plasmodium protein, unknown function                           | 3.12  | 0.88    | 7.12    |
| PF3D7_0925100   | conserved Plasmodium protein, unknown function                           | 0.98  | 3.44    | 6.15    |
| PF3D7_0925200   | ribosomal RNA-processing protein 8, putative (RRP8)                      | -0.34 | 81.57   | 58.21   |
| PF3D7_0925300   | proline--tRNA ligase, putative (aPRS)                                    | 0.11  | 11.65   | 11.33   |
| PF3D7_0925400   | protein phosphatase-beta                                                 | 0.47  | 5.48    | 6.84    |
| PF3D7_0925500   | thioredoxin-like protein 2 (TLP2)                                        | 1.32  | 18.64   | 42.07   |
| PF3D7_0925600   | zinc binding protein (Yippee), putative                                  | 0.97  | 9.38    | 16.60   |
| PF3D7_0925700   | histone deacetylase 1 (HDAC1)                                            | -0.61 | 200.35  | 118.53  |
| PF3D7_0925800   | conserved Plasmodium protein, unknown function                           | -0.19 | 12.13   | 9.58    |
| PF3D7_0925900   | conserved Plasmodium protein, unknown function                           | -0.61 | 1524.13 | 901.90  |
| PF3D7_0926000   | protein kinase, putative                                                 | 0.13  | 6.08    | 5.99    |
| PF3D7_0926100   | protein kinase, putative                                                 | -1.07 | 200.34  | 85.85   |
| PF3D7_0926200   | conserved Plasmodium protein, unknown function                           | -0.32 | 6.61    | 4.72    |
| PF3D7_0926300   | protein kinase, putative                                                 | 1.08  | 3.49    | 6.68    |
| PF3D7_0926400   | monocarboxylate transporter, putative                                    | -0.96 | 39.26   | 18.22   |
| PF3D7_0926500   | conserved Plasmodium protein, unknown function                           | 0.60  | 14.17   | 19.42   |
| PF3D7_0926600   | conserved Plasmodium membrane protein, unknown function                  | 1.09  | 1.01    | 1.94    |
| PF3D7_0926700   | glutamine-dependent NAD(+) synthetase, putative (NADSYN)                 | -0.71 | 40.75   | 22.45   |
| PF3D7_0926800   | conserved Plasmodium protein, unknown function                           | 0.25  | 7.40    | 7.93    |
| PF3D7_0926900   | replication termination factor, putative                                 | 0.77  | 26.73   | 41.24   |
| PF3D7_0927000   | CS domain protein, putative                                              | 0.00  | 37.52   | 33.79   |
| PF3D7_0927100   | conserved Plasmodium protein, unknown function                           | 0.89  | 6.69    | 11.18   |
| PF3D7_0927200   | zinc finger protein, putative                                            | 1.78  | 2.59    | 8.02    |
| PF3D7_0927300   | fumarate hydratase, putative (FH)                                        | 1.05  | 13.95   | 26.15   |
| PF3D7_0927400   | conserved Plasmodium protein, unknown function                           | 0.49  | 1.00    | 1.27    |
| PF3D7_0927500   | dynein light chain, putative                                             | 0.66  | 1.98    | 2.85    |
| PF3D7_0927600   | conserved Plasmodium protein, unknown function                           | 0.73  | 32.76   | 48.91   |
| PF3D7_0927700   | serine/threonine protein phosphatase 4, putative (PPP4)                  | 0.34  | 14.60   | 16.65   |
| PF3D7_0927800   | cytochrome c oxidase subunit 5B, putative (COX5B)                        | 0.86  | 33.65   | 55.00   |
| PF3D7_0927900   | phosphatidylserine decarboxylase (PSD)                                   | -1.43 | 193.20  | 64.88   |
| PF3D7_0928000.1 | cytochrome c oxidase subunit 6B, putative (COX6B)                        | 0.94  | 38.70   | 67.24   |
| PF3D7_0928000.2 | cytochrome c oxidase subunit 6B, putative (COX6B)                        | 0.84  | 39.02   | 63.15   |
| PF3D7_0928100   | conserved Plasmodium protein, unknown function                           | 2.06  | 1.75    | 6.62    |
| PF3D7_0928200   | conserved Plasmodium protein, unknown function                           | -1.35 | 46.24   | 16.34   |
| PF3D7_0928300   | conserved Plasmodium protein, unknown function                           | -0.68 | 15.95   | 8.96    |
| PF3D7_0928400   | conserved Plasmodium membrane protein, unknown function                  | -0.25 | 68.36   | 51.69   |
| PF3D7_0928500   | conserved Plasmodium protein, unknown function                           | 0.13  | 21.58   | 21.25   |
| PF3D7_0928600   | conserved Plasmodium protein, unknown function                           | -0.10 | 20.11   | 16.97   |

|                 |                                                                          |       |         |         |
|-----------------|--------------------------------------------------------------------------|-------|---------|---------|
| PF3D7_0928700   | conserved Plasmodium protein, unknown function                           | 1.27  | 1.38    | 3.02    |
| PF3D7_0928800   | serine/threonine protein kinase, putative                                | 0.97  | 3.25    | 5.74    |
| PF3D7_0928900   | guanylate kinase (GK)                                                    | -1.27 | 43.49   | 16.20   |
| PF3D7_0929000   | transcription initiation factor TFIID subunit 7, putative (TAF7)         | -0.73 | 53.90   | 29.24   |
| PF3D7_0929100   | conserved Plasmodium protein, unknown function                           | 0.74  | 7.38    | 11.16   |
| PF3D7_0929200   | RNA-binding protein, putative                                            | -0.51 | 242.79  | 153.80  |
| PF3D7_0929300   | conserved Plasmodium protein, unknown function                           | 0.78  | 4.96    | 7.67    |
| PF3D7_0929400   | high molecular weight rhostry protein 2 (RhopH2)                         | -0.76 | 265.14  | 141.58  |
| PF3D7_0929500   | conserved protein, unknown function                                      | 0.93  | 0.39    | 0.69    |
| PF3D7_0929600   | G2 protein, putative                                                     | 1.60  | 10.64   | 29.16   |
| PF3D7_0929700   | conserved Plasmodium protein, unknown function                           | -0.23 | 3.28    | 2.52    |
| PF3D7_0929800   | conserved Plasmodium protein, unknown function                           | -0.62 | 0.45    | 0.23    |
| PF3D7_0929900   | conserved Plasmodium protein, unknown function                           | 0.43  | 4.16    | 5.08    |
| PF3D7_0930000   | procollagen lysine 5-dioxygenase, putative                               | 1.74  | 0.19    | 0.59    |
| PF3D7_0930100   | conserved Plasmodium protein, unknown function                           | -0.13 | 9.72    | 8.01    |
| PF3D7_0930200   | leucine-rich repeat protein (LRR8)                                       | -0.56 | 18.13   | 11.07   |
| PF3D7_0930300   | merozoite surface protein 1 (MSP1)                                       | 0.95  | 845.51  | 1469.54 |
| PF3D7_0930400.1 | conserved Plasmodium protein, unknown function                           | -0.44 | 77.18   | 51.43   |
| PF3D7_0930400.2 | conserved Plasmodium protein, unknown function                           | -0.43 | 77.35   | 51.82   |
| PF3D7_0930500   | diacylglycerol kinase, putative (DGK1)                                   | -0.27 | 45.19   | 33.81   |
| PF3D7_0930600   | peptidyl-prolyl cis-trans isomerase (CYP72)                              | -1.26 | 29.74   | 11.16   |
| PF3D7_0930700   | conserved Plasmodium protein, unknown function                           | -0.58 | 14.50   | 8.75    |
| PF3D7_0930800   | conserved Plasmodium membrane protein, unknown function                  | -0.55 | 10.79   | 6.66    |
| PF3D7_0930900   | NifU-like protein, putative (IscU2)                                      | -0.10 | 4.02    | 3.38    |
| PF3D7_0931000   | elongation factor Tu, putative                                           | -1.44 | 30.50   | 10.13   |
| PF3D7_0931100   | nucleolar protein Nop52, putative                                        | -0.07 | 88.33   | 76.03   |
| PF3D7_0931200   | selenoprotein (Sel2)                                                     | -2.32 | 19.35   | 3.47    |
| PF3D7_0931300   | asparagine-rich antigen, putative                                        | 1.55  | 8.42    | 22.25   |
| PF3D7_0931400   | conserved Plasmodium protein, unknown function                           | 0.99  | 36.92   | 66.23   |
| PF3D7_0931500   | conserved Plasmodium protein, unknown function                           | -1.18 | 24.78   | 9.84    |
| PF3D7_0931600   | conserved protein, unknown function                                      | 3.28  | 0.03    | 0.49    |
| PF3D7_0931700   | PIH1 domain-containing protein, putative                                 | 1.86  | 1.13    | 3.71    |
| PF3D7_0931800   | proteasome subunit beta type-6, putative                                 | -0.28 | 129.15  | 95.84   |
| PF3D7_0931900   | adenylate kinase-like protein 2 (AKLP2)                                  | 0.97  | 4.78    | 8.49    |
| PF3D7_0932000   | conserved Plasmodium protein, unknown function                           | 1.28  | 67.56   | 148.09  |
| PF3D7_0932100   | protein MAM3, putative                                                   | 0.68  | 34.50   | 49.85   |
| PF3D7_0932200   | profilin, putative (PFN)                                                 | 1.47  | 138.78  | 346.88  |
| PF3D7_0932300   | M18 aspartyl aminopeptidase (M18AAP)                                     | -0.63 | 60.53   | 35.25   |
| PF3D7_0932400   | peptide release factor, putative                                         | 0.68  | 9.94    | 14.35   |
| PF3D7_0932500   | palmitoyltransferase, putative (DHHC6)                                   | 0.49  | 5.08    | 6.43    |
| PF3D7_0932600   | apicoplast ribosomal protein S6, putative (RPS6)                         | 0.15  | 4.61    | 4.61    |
| PF3D7_0932700   | conserved Plasmodium protein, unknown function                           | -0.44 | 2.52    | 1.67    |
| PF3D7_0932800   | conserved Plasmodium protein, unknown function                           | -0.50 | 51.30   | 32.82   |
| PF3D7_0932900   | conserved Plasmodium protein, unknown function                           | -2.60 | 6.43    | 0.92    |
| PF3D7_0933000   | mRNA processing protein, putative                                        | -0.47 | 76.15   | 49.57   |
| PF3D7_0933100   | conserved Plasmodium protein, unknown function                           | 0.17  | 6.82    | 6.91    |
| PF3D7_0933200   | calcyclin binding protein, putative                                      | 0.96  | 9.51    | 16.77   |
| PF3D7_0933300   | conserved Plasmodium protein, unknown function                           | -0.08 | 5.16    | 4.40    |
| PF3D7_0933400   | conserved Plasmodium protein, unknown function                           | 0.41  | 2.86    | 3.42    |
| PF3D7_0933500   | gamma-tubulin complex component, putative                                | -0.04 | 10.58   | 9.29    |
| PF3D7_0933600   | mitochondrial-processing peptidase subunit beta, putative (MAS1)         | 0.38  | 62.44   | 73.28   |
| PF3D7_0933700   | conserved Plasmodium protein, unknown function                           | -0.04 | 11.46   | 10.04   |
| PF3D7_0933800   | delta tubulin, putative                                                  | 0.62  | 0.75    | 1.04    |
| PF3D7_0933900   | conserved Plasmodium protein, unknown function                           | 0.65  | 48.82   | 69.06   |
| PF3D7_0934000   | histidine-tRNA ligase, putative                                          | 0.07  | 8.11    | 7.70    |
| PF3D7_0934100   | TFIIH basal transcription factor complex helicase XPD subunit (XPD)      | -0.58 | 49.82   | 30.09   |
| PF3D7_0934200   | conserved Plasmodium protein, unknown function                           | -1.64 | 9.05    | 2.58    |
| PF3D7_0934300   | conserved Plasmodium protein, unknown function                           | 0.12  | 9.26    | 9.10    |
| PF3D7_0934400   | transcription factor with AP2 domain(s), putative (ApiAP2)               | 1.21  | 28.71   | 60.04   |
| PF3D7_0934500   | V-type proton ATPase subunit E, putative                                 | -0.58 | 248.14  | 149.73  |
| PF3D7_0934600   | conserved Plasmodium protein, unknown function                           | -0.46 | 11.14   | 7.31    |
| PF3D7_0934700   | UBX domain, putative                                                     | 0.05  | 94.06   | 87.76   |
| PF3D7_0934800   | cAMP-dependent protein kinase catalytic subunit (PKAc)                   | 0.36  | 115.98  | 134.40  |
| PF3D7_0934900   | conserved Plasmodium protein, unknown function                           | -1.00 | 16.37   | 7.39    |
| PF3D7_0935000   | U2 small nuclear ribonucleoprotein B', putative                          | -0.70 | 159.72  | 88.76   |
| PF3D7_0935100   | conserved protein, unknown function                                      | 0.55  | 54.93   | 72.35   |
| PF3D7_0935200   | vacuolar protein sorting-associated protein 33, putative (VPS33)         | 0.24  | 55.41   | 59.15   |
| PF3D7_0935300   | phosphatidylinositol N-acetylglucosaminyltransferase subunit P, putative | -0.67 | 16.95   | 9.56    |
| PF3D7_0935400   | gametocyte development protein 1 (GDV1)                                  | 0.51  | 11.75   | 15.08   |
| PF3D7_0935500   | Plasmodium exported protein, unknown function (GEXP22)                   | 0.32  | 48.69   | 54.72   |
| PF3D7_0935600   | gametocytogenesis-implicated protein (GIG)                               | -0.14 | 1062.36 | 870.68  |
| PF3D7_0935700   | Plasmodium exported protein, unknown function                            | -0.18 | 144.66  | 115.56  |
| PF3D7_0935800   | cytoadherence linked asexual protein 9 (CLAG9)                           | -0.55 | 102.91  | 63.24   |
| PF3D7_0935900   | ring-exported protein 1 (REX1)                                           | -0.15 | 5832.63 | 4756.85 |
| PF3D7_0936000   | ring-exported protein 2 (REX2)                                           | -0.19 | 1919.61 | 1516.35 |
| PF3D7_0936100   | early transcribed membrane protein (ETRAMP9)                             | -0.95 | 119.84  | 56.08   |
| PF3D7_0936200   | Plasmodium exported protein (hyp11), unknown function                    | 0.64  | 25.03   | 35.28   |
| PF3D7_0936300   | ring-exported protein 3 (REX3)                                           | -0.34 | 2782.78 | 1979.62 |
| PF3D7_0936400   | ring-exported protein 4 (REX4)                                           | -0.86 | 142.80  | 70.77   |
| PF3D7_0936500   | virulence-associated protein 1 (VAP1)                                    | -0.27 | 5.69    | 4.25    |
| PF3D7_0936600   | Plasmodium exported protein (PHISTc), unknown function (GEXP05)          | -0.90 | 530.25  | 256.71  |
| PF3D7_0936700   | lysophospholipase, putative                                              | -2.00 | 36.19   | 8.17    |
| PF3D7_0936800   | Plasmodium exported protein (PHISTc), unknown function                   | -1.01 | 4466.26 | 2007.79 |
| PF3D7_0936900   | Plasmodium exported protein (PHISTb), unknown function, pseudogene       | -0.62 | 0.70    | 0.40    |
| PF3D7_0937000   | Plasmodium exported protein (PHISTb), unknown function                   | -1.40 | 0.04    | 0.00    |
| PF3D7_0937100   | Plasmodium exported protein, unknown function                            | 1.19  | 0.00    | 0.03    |
| PF3D7_0937200   | lysophospholipase, putative                                              | 0.85  | 1.90    | 3.11    |
| PF3D7_0937300   | rifin (RIF)                                                              | -0.43 | 1.30    | 0.87    |
| PF3D7_0937400   | rifin (RIF)                                                              | 0.69  | 0.58    | 0.85    |
| PF3D7_0937500   | rifin (RIF)                                                              | 1.70  | 1.51    | 4.48    |
| PF3D7_0937600   | erythrocyte membrane protein 1, PfEMP1 (VAR)                             | -0.08 | 3.01    | 2.57    |
| PF3D7_0937700   | rifin (RIF)                                                              | 1.44  | 4.18    | 10.28   |
| PF3D7_0937800   | erythrocyte membrane protein 1, PfEMP1 (VAR)                             | 0.94  | 10.69   | 18.53   |
| PF3D7_1000100   | erythrocyte membrane protein 1, PfEMP1 (VAR)                             | 1.38  | 4.59    | 10.80   |
| PF3D7_1000200   | rifin (RIF)                                                              | 1.24  | 4.05    | 8.67    |
| PF3D7_1000300   | rifin (RIF)                                                              | -0.62 | 1.53    | 0.89    |
| PF3D7_1000400   | rifin (RIF)                                                              | -0.55 | 0.28    | 0.17    |
| PF3D7_1000500   | rifin (RIF)                                                              | 1.67  | 0.65    | 1.89    |



|                 |                                                                        |       |         |         |
|-----------------|------------------------------------------------------------------------|-------|---------|---------|
| PF3D7_1000600   | rifin (RIF)                                                            | 3.15  | 2.56    | 20.61   |
| PF3D7_1000700   | Plasmodium exported protein (PHISTa), unknown function, pseudogene     | -0.26 | 7.88    | 5.92    |
| PF3D7_1000800   | stevor, pseudogene                                                     | 3.74  | 3.08    | 37.34   |
| PF3D7_1000900   | erythrocyte membrane protein 1 (PfEMP1), truncated                     | 3.46  | 0.03    | 0.48    |
| PF3D7_1001000   | Plasmodium exported protein (hyp12), unknown function (Pj13)           | -0.43 | 19.99   | 13.37   |
| PF3D7_1001100.1 | acyl-CoA binding protein, isoform 1, ACBP1 (ACBP1)                     | 0.08  | 194.65  | 185.54  |
| PF3D7_1001100.2 | acyl-CoA binding protein, isoform 1, ACBP1 (ACBP1)                     | 0.06  | 213.27  | 200.88  |
| PF3D7_1001200   | acyl-CoA binding protein, isoform 2, ACBP2 (ACBP2)                     | 0.36  | 38.15   | 44.12   |
| PF3D7_1001300   | Plasmodium exported protein (PHISTa), unknown function                 | -1.00 | 4.31    | 1.93    |
| PF3D7_1001400   | alpha/beta hydrolase, putative                                         | -1.10 | 395.78  | 166.64  |
| PF3D7_1001500   | early transcribed membrane protein 10.1 (ETRAMP10)                     | -0.25 | 8529.84 | 6457.30 |
| PF3D7_1001600   | alpha/beta hydrolase, putative                                         | -1.31 | 133.39  | 48.57   |
| PF3D7_1001700   | Plasmodium exported protein (PHISTc), unknown function                 | -0.85 | 581.22  | 291.40  |
| PF3D7_1001800   | Plasmodium exported protein (PHISTc), unknown function                 | -0.57 | 175.62  | 106.65  |
| PF3D7_1001900   | Plasmodium exported protein (hyp16), unknown function (Pj13)           | -1.03 | 381.12  | 168.80  |
| PF3D7_1002000   | Plasmodium exported protein (hyp2), unknown function                   | -0.27 | 83.43   | 62.28   |
| PF3D7_1002100   | EMP1-trafficking protein (PTP5)                                        | 0.23  | 1805.46 | 1912.50 |
| PF3D7_1002200   | tryptophan-rich antigen 3 (PAr)                                        | 0.78  | 26.24   | 40.62   |
| PF3D7_1002300   | conserved Plasmodium protein, unknown function                         | 0.33  | 2.43    | 2.76    |
| PF3D7_1002400.1 | RNA-binding protein, putative                                          | -0.02 | 632.86  | 564.53  |
| PF3D7_1002400.2 | RNA-binding protein, putative                                          | -0.02 | 636.65  | 567.39  |
| PF3D7_1002500   | conserved Plasmodium protein, unknown function                         | -0.50 | 120.30  | 76.77   |
| PF3D7_1002600   | conserved Plasmodium protein, unknown function                         | -0.69 | 2.61    | 1.45    |
| PF3D7_1002700   | conserved Plasmodium protein, unknown function                         | -0.57 | 22.57   | 13.68   |
| PF3D7_1002800   | DnaJ protein, putative                                                 | 0.65  | 1.84    | 2.60    |
| PF3D7_1002900   | conserved Plasmodium protein, unknown function                         | 0.30  | 69.07   | 76.59   |
| PF3D7_1003000   | conserved Plasmodium protein, unknown function                         | -0.54 | 9.06    | 5.63    |
| PF3D7_1003100   | conserved Plasmodium protein, unknown function                         | 1.25  | 8.96    | 19.31   |
| PF3D7_1003200   | conserved Plasmodium protein, unknown function                         | 1.28  | 4.29    | 9.44    |
| PF3D7_1003300   | N-acetyltransferase, putative                                          | 0.02  | 73.69   | 67.58   |
| PF3D7_1003400   | conserved Plasmodium protein, unknown function                         | 0.62  | 10.06   | 13.95   |
| PF3D7_1003500   | 40S ribosomal protein S20e, putative                                   | -0.07 | 814.61  | 698.45  |
| PF3D7_1003600   | inner membrane complex protein 1c, putative (IMC1c)                    | 1.64  | 160.69  | 452.84  |
| PF3D7_1003700   | conserved Plasmodium protein, unknown function                         | 0.36  | 7.80    | 9.01    |
| PF3D7_1003800   | U5 small nuclear ribonuclear protein, putative                         | -0.33 | 90.72   | 64.92   |
| PF3D7_1003900   | conserved Plasmodium protein, unknown function                         | -0.75 | 1.99    | 1.05    |
| PF3D7_1004000   | 60S ribosomal protein L13, putative                                    | -0.02 | 1269.79 | 1128.09 |
| PF3D7_1004100   | hypothetical protein                                                   | -1.27 | 3.95    | 1.48    |
| PF3D7_1004200   | WD repeat-containing protein, putative                                 | -0.11 | 16.71   | 13.94   |
| PF3D7_1004300   | E3 ubiquitin-protein ligase, putative                                  | -0.33 | 222.06  | 159.72  |
| PF3D7_1004400   | RNA-binding protein, putative                                          | 0.45  | 57.06   | 70.56   |
| PF3D7_1004500   | conserved Plasmodium protein, unknown function                         | -0.99 | 21.92   | 9.91    |
| PF3D7_1004600   | conserved Plasmodium membrane protein, unknown function                | 0.11  | 8.21    | 8.01    |
| PF3D7_1004700   | conserved Plasmodium protein, unknown function                         | 0.27  | 5.96    | 6.50    |
| PF3D7_1004800   | ADP/ATP carrier protein, putative                                      | 0.45  | 12.17   | 14.97   |
| PF3D7_1004900   | conserved Plasmodium protein, unknown function                         | 1.14  | 11.76   | 23.46   |
| PF3D7_1005000   | methionine--tRNA ligase, putative (MRSapi)                             | 0.20  | 10.65   | 11.06   |
| PF3D7_1005100   | conserved protein, unknown function                                    | -0.38 | 27.46   | 19.00   |
| PF3D7_1005200   | conserved Plasmodium protein, unknown function                         | 0.19  | 0.36    | 0.37    |
| PF3D7_1005300   | conserved Plasmodium protein, unknown function                         | 0.34  | 0.37    | 0.42    |
| PF3D7_1005400   | conserved Plasmodium protein, unknown function                         | -0.50 | 0.56    | 0.35    |
| PF3D7_1005500   | regulator of nonsense transcripts, putative                            | 0.34  | 44.96   | 51.50   |
| PF3D7_1005600   | DnaJ protein, putative                                                 | -0.31 | 65.07   | 47.38   |
| PF3D7_1005700   | DnaJ protein, putative                                                 | -0.15 | 3.46    | 2.81    |
| PF3D7_1005800   | conserved Plasmodium membrane protein, unknown function                | 0.24  | 5.66    | 6.02    |
| PF3D7_1005900   | conserved Plasmodium protein, unknown function                         | 0.85  | 12.96   | 21.10   |
| PF3D7_1006000   | conserved Plasmodium protein, unknown function                         | 1.98  | 2.15    | 7.71    |
| PF3D7_1006100   | CCR4-NOT transcription complex subunit 5, putative (NOT5)              | 1.24  | 7.63    | 16.30   |
| PF3D7_1006200   | DNA/RNA-binding protein Alba 3 (ALBA3)                                 | 0.08  | 581.29  | 555.64  |
| PF3D7_1006300   | conserved Plasmodium protein, unknown function                         | 1.94  | 0.36    | 1.39    |
| PF3D7_1006400   | conserved Plasmodium protein, unknown function                         | -0.12 | 2.14    | 1.77    |
| PF3D7_1006500   | conserved Plasmodium protein, unknown function                         | 0.38  | 4.16    | 4.90    |
| PF3D7_1006600   | phosducin-like protein, putative (PhLP1)                               | 0.56  | 29.10   | 38.62   |
| PF3D7_1006700   | conserved Plasmodium protein, unknown function                         | -0.31 | 92.75   | 67.67   |
| PF3D7_1006800   | RNA-binding protein, putative                                          | -0.13 | 1382.64 | 1138.04 |
| PF3D7_1006900   | PPPDE peptidase, putative                                              | 0.19  | 40.15   | 41.21   |
| PF3D7_1007000   | conserved membrane protein, unknown function                           | 0.20  | 32.36   | 33.62   |
| PF3D7_1007100   | conserved Plasmodium protein, unknown function                         | 0.39  | 3.25    | 3.87    |
| PF3D7_1007200   | rhoGAP GTPase, putative                                                | 0.60  | 31.42   | 43.10   |
| PF3D7_1007300   | RING zinc finger protein, putative                                     | 1.19  | 8.01    | 16.48   |
| PF3D7_1007400   | conserved Plasmodium protein, unknown function                         | -0.54 | 26.57   | 16.44   |
| PF3D7_1007500   | conserved Plasmodium protein, unknown function                         | -1.36 | 36.37   | 12.75   |
| PF3D7_1007600   | conserved Plasmodium protein, unknown function                         | 0.31  | 132.57  | 148.16  |
| PF3D7_1007700   | transcription factor with AP2 domain(s) (ApiAP2)                       | 0.95  | 56.21   | 97.96   |
| PF3D7_1007800   | conserved Plasmodium protein, unknown function                         | -0.29 | 5.49    | 4.05    |
| PF3D7_1007900   | eukaryotic translation initiation factor 3 subunit D, putative (EIF3D) | -0.41 | 235.99  | 160.08  |
| PF3D7_1008000   | histone deacetylase 2 (HDA2)                                           | -0.76 | 70.99   | 37.87   |
| PF3D7_1008100   | conserved Plasmodium protein, unknown function                         | -0.57 | 86.29   | 52.59   |
| PF3D7_1008200   | endonuclease, putative                                                 | -0.94 | 5.07    | 2.37    |
| PF3D7_1008300   | conserved Plasmodium protein, unknown function, pseudogene             | 1.77  | 0.41    | 1.71    |
| PF3D7_1008400   | 26S protease regulatory subunit 4, putative (RPT2)                     | 0.62  | 240.83  | 333.43  |
| PF3D7_1008500   | conserved Plasmodium membrane protein, unknown function                | -0.70 | 49.53   | 27.47   |
| PF3D7_1008600   | zinc finger C-x8-C-x5-C-x3-H type, putative                            | 1.33  | 1.72    | 3.93    |
| PF3D7_1008700   | tubulin beta chain                                                     | 0.94  | 210.72  | 364.59  |
| PF3D7_1008800   | nucleolar protein 5, putative (NOP5)                                   | -0.08 | 461.29  | 393.00  |
| PF3D7_1008900   | adenylate kinase (AK1)                                                 | -0.01 | 227.78  | 203.67  |
| PF3D7_1009000   | diphthine synthase, putative                                           | -1.26 | 98.97   | 37.35   |
| PF3D7_1009100   | conserved Plasmodium membrane protein, unknown function                | -1.49 | 0.91    | 0.28    |
| PF3D7_1009200   | small subunit rRNA synthesis-associated protein, putative              | -0.29 | 28.02   | 20.74   |
| PF3D7_1009300   | conserved Plasmodium protein, unknown function                         | -1.09 | 13.16   | 5.56    |
| PF3D7_1009400   | zinc finger protein, putative                                          | -0.43 | 43.63   | 29.14   |
| PF3D7_1009500   | metallopeptidase, putative                                             | 0.88  | 10.17   | 16.95   |
| PF3D7_1009600   | protein phosphatase, putative                                          | 0.18  | 5.37    | 5.48    |
| PF3D7_1009700   | tubulin--tyrosine ligase, putative                                     | 0.58  | 33.96   | 45.88   |
| PF3D7_1009800   | conserved Plasmodium membrane protein, unknown function                | -1.45 | 25.38   | 8.36    |
| PF3D7_1009900   | conserved Plasmodium protein, unknown function                         | -1.12 | 13.00   | 5.38    |
| PF3D7_1010000   | ribosomal protein L43, mitochondrial, putative                         | -0.14 | 25.61   | 20.99   |
| PF3D7_1010100   | conserved Plasmodium protein, unknown function                         | -1.26 | 70.57   | 26.57   |

|                 |                                                                   |       |         |         |
|-----------------|-------------------------------------------------------------------|-------|---------|---------|
| PF3D7_1010200   | DNA2/NAM7 helicase, putative                                      | -0.35 | 77.98   | 55.24   |
| PF3D7_1010300   | succinate dehydrogenase subunit 4, putative (SDH4)                | -0.52 | 737.31  | 462.73  |
| PF3D7_1010400   | conserved Plasmodium protein, unknown function                    | -0.43 | 15.51   | 10.41   |
| PF3D7_1010500   | ankyrin-repeat protein, putative                                  | 0.59  | 1.89    | 2.57    |
| PF3D7_1010600   | eukaryotic translation initiation factor 2 beta subunit, putative | -0.34 | 678.12  | 481.84  |
| PF3D7_1010700   | dolichyl-phosphate-mannose protein mannosyltransferase, putative  | -0.24 | 160.33  | 122.35  |
| PF3D7_1010800   | 50S ribosomal protein L22, mitochondrial, putative                | 0.99  | 5.00    | 8.96    |
| PF3D7_1010900   | conserved Plasmodium protein, unknown function                    | 0.02  | 15.49   | 14.15   |
| PF3D7_1011000   | inner membrane complex sub-compartment protein 1 (ISP1)           | 1.05  | 10.97   | 20.59   |
| PF3D7_1011100   | conserved Plasmodium protein, unknown function                    | -1.64 | 10.05   | 2.90    |
| PF3D7_1011200.1 | conserved Plasmodium protein, unknown function                    | -1.26 | 26.68   | 10.01   |
| PF3D7_1011200.2 | conserved Plasmodium protein, unknown function                    | -1.27 | 25.71   | 9.55    |
| PF3D7_1011300   | conserved Plasmodium membrane protein, unknown function           | -0.90 | 2.82    | 1.36    |
| PF3D7_1011400   | proteasome subunit beta type-5                                    | -0.48 | 102.97  | 66.58   |
| PF3D7_1011500   | conserved Plasmodium membrane protein, unknown function           | 0.01  | 26.35   | 23.90   |
| PF3D7_1011600   | conserved Plasmodium protein, unknown function                    | -1.09 | 6.43    | 2.71    |
| PF3D7_1011700   | DNA repair protein RAD23, putative                                | -0.43 | 97.75   | 65.39   |
| PF3D7_1011800   | PRE-binding protein (PREBP)                                       | -0.12 | 664.31  | 550.19  |
| PF3D7_1011900   | heme oxygenase (HO)                                               | -0.04 | 25.45   | 22.40   |
| PF3D7_1012000   | E3 ubiquitin-protein ligase, putative                             | -0.08 | 24.72   | 21.16   |
| PF3D7_1012100   | conserved Plasmodium protein, unknown function                    | 0.95  | 13.82   | 24.16   |
| PF3D7_1012200   | conserved Plasmodium protein, unknown function                    | 0.64  | 59.76   | 83.99   |
| PF3D7_1012300   | ubiquinol-cytochrome c reductase complex subunit, putative        | 1.53  | 16.52   | 43.12   |
| PF3D7_1012400   | hypoxanthine-guanine phosphoribosyltransferase (HGPRT)            | 0.43  | 727.89  | 882.98  |
| PF3D7_1012500   | phosphoglucosyltransferase, putative                              | -0.11 | 36.53   | 30.63   |
| PF3D7_1012600   | GMP synthetase (GMPS)                                             | -0.49 | 210.50  | 134.92  |
| PF3D7_1012700   | NLI interacting factor-like phosphatase, putative (NIF4)          | -0.95 | 33.18   | 15.50   |
| PF3D7_1012800   | conserved Plasmodium protein, unknown function                    | 0.17  | 2.05    | 2.08    |
| PF3D7_1012900   | autophagy-related protein 18, putative (ATG18)                    | -0.90 | 173.18  | 83.74   |
| PF3D7_1013000   | zinc finger protein, putative                                     | -1.29 | 15.08   | 5.55    |
| PF3D7_1013100   | U3 small nucleolar RNA-associated protein 13, putative (UTP13)    | -0.95 | 65.11   | 30.35   |
| PF3D7_1013200   | conserved Plasmodium protein, unknown function                    | 0.27  | 23.30   | 25.34   |
| PF3D7_1013300   | conserved Plasmodium protein, unknown function                    | -2.81 | 19.17   | 2.45    |
| PF3D7_1013400   | conserved Plasmodium protein, unknown function                    | 0.61  | 4.00    | 5.51    |
| PF3D7_1013500   | phosphoinositide-specific phospholipase C (PI-PLC)                | -0.72 | 21.31   | 11.65   |
| PF3D7_1013600   | conserved Plasmodium protein, unknown function                    | 0.00  | 8.90    | 8.05    |
| PF3D7_1013700   | conserved Plasmodium protein, unknown function                    | -0.82 | 4.67    | 2.36    |
| PF3D7_1013800   | conserved Plasmodium protein, unknown function                    | 0.60  | 39.37   | 53.71   |
| PF3D7_1013900   | initiation factor 2 subunit family, putative                      | -0.08 | 51.06   | 43.72   |
| PF3D7_1014000   | GDP-L-fucose synthase (FS)                                        | -0.01 | 5.58    | 5.06    |
| PF3D7_1014100   | conserved Plasmodium protein, unknown function                    | 0.65  | 20.49   | 29.01   |
| PF3D7_1014200   | male gamete fusion factor HAP2, putative (HAP2)                   | 1.11  | 0.33    | 0.65    |
| PF3D7_1014300   | conserved protein, unknown function                               | 0.92  | 13.68   | 23.37   |
| PF3D7_1014400   | MO15-related protein kinase (MRK)                                 | -0.96 | 65.18   | 30.16   |
| PF3D7_1014500   | conserved Plasmodium protein, unknown function                    | -1.13 | 6.63    | 2.73    |
| PF3D7_1014600   | transcriptional coactivator ADA2 (ADA2)                           | 0.24  | 194.67  | 207.88  |
| PF3D7_1014700   | prohibitin, putative                                              | 1.21  | 10.01   | 20.87   |
| PF3D7_1014800   | conserved Plasmodium protein, unknown function                    | 0.72  | 0.70    | 1.04    |
| PF3D7_1014900   | conserved Plasmodium protein, unknown function                    | 0.18  | 35.06   | 35.79   |
| PF3D7_1015000   | FAD synthetase, putative                                          | 0.69  | 8.42    | 12.27   |
| PF3D7_1015100   | conserved protein, unknown function                               | -0.58 | 37.93   | 22.84   |
| PF3D7_1015200.1 | cysteine-tRNA ligase, putative (CysRS)                            | -0.72 | 84.78   | 46.54   |
| PF3D7_1015200.2 | cysteine-tRNA ligase, putative (CysRS)                            | -0.72 | 84.90   | 46.59   |
| PF3D7_1015200.3 | cysteine-tRNA ligase, putative                                    | -0.71 | 95.86   | 52.83   |
| PF3D7_1015300   | methionine aminopeptidase 1b, putative (METAP1b)                  | -0.17 | 90.56   | 72.65   |
| PF3D7_1015400   | conserved Plasmodium protein, unknown function                    | -0.53 | 12.20   | 7.64    |
| PF3D7_1015500   | conserved Plasmodium protein, unknown function                    | 0.12  | 3.05    | 3.00    |
| PF3D7_1015600   | heat shock protein 60 (HSP60)                                     | 1.21  | 30.66   | 63.99   |
| PF3D7_1015700.1 | tubulin binding cofactor c, putative                              | 0.58  | 4.42    | 5.96    |
| PF3D7_1015700.2 | tubulin binding cofactor c, putative                              | 0.63  | 3.98    | 5.56    |
| PF3D7_1015800   | ribonucleotide reductase small subunit, putative                  | 0.82  | 37.73   | 60.02   |
| PF3D7_1015900   | enolase (ENO)                                                     | 0.06  | 1960.80 | 1846.18 |
| PF3D7_1016000   | conserved Plasmodium protein, unknown function                    | 0.29  | 9.69    | 10.70   |
| PF3D7_1016100   | conserved Plasmodium protein, unknown function                    | -2.02 | 2.52    | 0.54    |
| PF3D7_1016200   | conserved Plasmodium protein, unknown function                    | -1.07 | 46.38   | 19.98   |
| PF3D7_1016300   | glycophorin binding protein (GBP)                                 | -0.70 | 3120.34 | 1729.84 |
| PF3D7_1016400   | serine/threonine protein kinase, FIKK family (FIKK10.1)           | -0.48 | 204.52  | 132.37  |
| PF3D7_1016500   | Plasmodium exported protein (PHISTc), unknown function            | 0.66  | 4.94    | 7.06    |
| PF3D7_1016600   | Plasmodium exported protein (PHISTc), unknown function            | -1.51 | 45.00   | 14.27   |
| PF3D7_1016700   | Plasmodium exported protein (PHISTc), unknown function            | -0.49 | 95.92   | 61.42   |
| PF3D7_1016800   | Plasmodium exported protein (PHISTc), unknown function            | -0.75 | 257.13  | 138.06  |
| PF3D7_1016900   | early transcribed membrane protein 10.3 (ETRAMP10.3)              | 2.78  | 116.04  | 717.88  |
| PF3D7_1017000   | DNA polymerase delta catalytic subunit                            | 0.81  | 11.50   | 18.16   |
| PF3D7_1017100   | rhostry neck protein 12 (RON12)                                   | -0.42 | 65.42   | 44.21   |
| PF3D7_1017200   | enoyl-CoA hydratase-related protein, putative                     | 0.09  | 3.99    | 3.85    |
| PF3D7_1017300.1 | golgi re-assembly stacking protein 1 (GRASP)                      | 0.39  | 22.11   | 26.23   |
| PF3D7_1017300.2 | golgi re-assembly stacking protein 2 (GRASP)                      | 0.43  | 22.43   | 27.34   |
| PF3D7_1017400   | phosphomannomutase, putative (PMM)                                | -0.69 | 193.80  | 108.16  |
| PF3D7_1017500   | conserved Plasmodium protein, unknown function                    | 1.35  | 39.05   | 89.85   |
| PF3D7_1017600   | conserved Plasmodium protein, unknown function                    | -0.44 | 159.39  | 106.18  |
| PF3D7_1017700   | conserved Plasmodium protein, unknown function                    | -0.26 | 7.79    | 5.86    |
| PF3D7_1017800   | conserved Plasmodium protein, unknown function                    | -0.91 | 11.55   | 5.54    |
| PF3D7_1017900   | 26S proteasome regulatory subunit p55, putative (RPN5)            | -1.13 | 112.35  | 46.21   |
| PF3D7_1018000   | tRNA pseudouridine synthase, putative                             | -0.44 | 10.93   | 7.25    |
| PF3D7_1018100   | conserved Plasmodium protein, unknown function                    | -0.42 | 1.35    | 0.90    |
| PF3D7_1018200   | serine/threonine protein phosphatase 8, putative (PPP8)           | -0.06 | 32.99   | 28.61   |
| PF3D7_1018300   | conserved Plasmodium protein, unknown function                    | -0.39 | 134.96  | 92.79   |
| PF3D7_1018400   | conserved Plasmodium protein, unknown function                    | -2.83 | 11.42   | 1.42    |
| PF3D7_1018500   | PHF5-like protein, putative                                       | 0.55  | 62.87   | 82.80   |
| PF3D7_1018600   | conserved Plasmodium protein, unknown function                    | -0.26 | 61.73   | 46.49   |
| PF3D7_1018700   | conserved Plasmodium protein, unknown function                    | -1.35 | 167.03  | 59.04   |
| PF3D7_1018800   | conserved protein, unknown function                               | -0.29 | 5.37    | 3.95    |
| PF3D7_1018900   | conserved Plasmodium protein, unknown function                    | -0.40 | 5.08    | 3.48    |
| PF3D7_1019000   | eukaryotic translation initiation factor subunit eIF2A, putative  | -0.89 | 195.94  | 95.62   |
| PF3D7_1019100   | conserved Plasmodium protein, unknown function                    | -0.21 | 8.31    | 6.49    |
| PF3D7_1019200   | conserved Plasmodium protein, unknown function                    | 0.14  | 1.26    | 1.25    |
| PF3D7_1019300   | zinc finger protein, putative                                     | 0.22  | 10.74   | 11.27   |
| PF3D7_1019400   | 60S ribosomal protein L30c, putative                              | 0.05  | 751.79  | 704.35  |

|                 |                                                                                 |       |         |         |
|-----------------|---------------------------------------------------------------------------------|-------|---------|---------|
| PF3D7_1019500.1 | conserved Plasmodium membrane protein, unknown function                         | 0.35  | 15.07   | 17.36   |
| PF3D7_1019500.2 | conserved Plasmodium membrane protein, unknown function                         | 0.35  | 15.07   | 17.36   |
| PF3D7_1019600   | conserved Plasmodium protein, unknown function                                  | -0.21 | 12.86   | 10.00   |
| PF3D7_1019700   | conserved Plasmodium protein, unknown function                                  | 0.30  | 16.33   | 18.19   |
| PF3D7_1019800   | tRNA methyltransferase, putative                                                | -0.30 | 6.73    | 4.95    |
| PF3D7_1019900   | autophagy-related protein 8 (ATG8)                                              | 0.41  | 28.79   | 34.64   |
| PF3D7_1020000   | large subunit rRNA processing RRM protein, putative                             | 0.67  | 75.01   | 107.69  |
| PF3D7_1020100   | flagellar outer arm dynein-associated protein, putative                         | 2.47  | 2.42    | 12.34   |
| PF3D7_1020200   | conserved Plasmodium protein, unknown function                                  | 1.44  | 2.32    | 5.68    |
| PF3D7_1020300   | cytoplasmic dynein intermediate chain, putative                                 | 1.35  | 4.13    | 9.51    |
| PF3D7_1020400   | S-adenosyl-L-methionine-dependent methyltransferase, putative                   | -0.60 | 31.55   | 18.76   |
| PF3D7_1020500   | conserved Plasmodium protein, unknown function                                  | -0.21 | 12.21   | 9.49    |
| PF3D7_1020600   | conserved Plasmodium membrane protein, unknown function                         | -0.23 | 4.24    | 3.26    |
| PF3D7_1020700   | histone acetyltransferase, putative                                             | -0.96 | 69.80   | 32.44   |
| PF3D7_1020800   | dihydrolipoamide acyltransferase component E2 (DLAT)                            | 0.50  | 12.09   | 15.46   |
| PF3D7_1020900   | ADP-ribosylation factor (ARF1)                                                  | 0.08  | 221.95  | 212.33  |
| PF3D7_1021000   | conserved Plasmodium protein, unknown function                                  | 0.56  | 13.33   | 17.76   |
| PF3D7_1021100   | conserved Plasmodium protein, unknown function                                  | -1.06 | 16.81   | 7.25    |
| PF3D7_1021200   | conserved Plasmodium protein, unknown function                                  | 0.49  | 12.30   | 15.54   |
| PF3D7_1021300   | conserved Plasmodium membrane protein, unknown function                         | -1.14 | 11.29   | 4.61    |
| PF3D7_1021400   | endomembrane protein 70, putative                                               | -0.47 | 79.55   | 51.87   |
| PF3D7_1021500   | RNA helicase, putative                                                          | -0.58 | 36.16   | 21.84   |
| PF3D7_1021600   | deoxyribose-phosphate aldolase, putative                                        | 0.48  | 67.51   | 85.05   |
| PF3D7_1021700   | conserved Plasmodium membrane protein, unknown function                         | 1.09  | 9.75    | 18.75   |
| PF3D7_1021800   | schizont egress antigen-1 (SEA1)                                                | 0.20  | 75.82   | 78.39   |
| PF3D7_1021900   | conserved Plasmodium protein (10b antigen), unknown function                    | 0.36  | 55.24   | 64.00   |
| PF3D7_1022000   | RNA-binding protein, putative                                                   | -1.18 | 44.17   | 17.59   |
| PF3D7_1022100   | conserved Plasmodium protein, unknown function                                  | -0.71 | 96.23   | 53.09   |
| PF3D7_1022200   | conserved Plasmodium membrane protein, unknown function                         | -0.57 | 10.54   | 6.41    |
| PF3D7_1022300   | ZIP domain-containing protein, putative (ZIPCO)                                 | 0.80  | 3.00    | 4.71    |
| PF3D7_1022400   | serine/arginine-rich splicing factor 4 (SRSF4)                                  | 0.30  | 334.60  | 372.36  |
| PF3D7_1022500   | citrate synthase, mitochondrial precursor, putative (CS)                        | 0.53  | 21.57   | 28.01   |
| PF3D7_1022600   | kelch protein, putative                                                         | -1.07 | 139.20  | 59.64   |
| PF3D7_1022700   | phospholipid scramblase, putative                                               | 0.36  | 59.89   | 69.59   |
| PF3D7_1022800   | 4-hydroxy-3-methylbut-2-en-1-yl diphosphate synthase (GcpE)                     | 0.35  | 12.61   | 14.49   |
| PF3D7_1022900   | CDGSH iron-sulfur domain-containing protein, putative                           | 1.65  | 5.58    | 15.93   |
| PF3D7_1023000   | conserved Plasmodium membrane protein, unknown function                         | -0.40 | 9.05    | 6.17    |
| PF3D7_1023100   | dynein heavy chain, putative                                                    | 1.35  | 0.26    | 0.60    |
| PF3D7_1023200   | orotidine 5'-phosphate decarboxylase (OMPDC)                                    | -0.78 | 60.93   | 31.99   |
| PF3D7_1023300   | conserved Plasmodium protein, unknown function                                  | 0.96  | 8.40    | 14.78   |
| PF3D7_1023400   | HORMA domain protein, putative                                                  | 0.32  | 20.69   | 23.27   |
| PF3D7_1023500   | conserved Plasmodium protein, unknown function                                  | -0.30 | 5.79    | 4.23    |
| PF3D7_1023600   | conserved Plasmodium protein, unknown function                                  | 1.22  | 0.28    | 0.60    |
| PF3D7_1023700   | conserved Plasmodium protein, unknown function                                  | 1.05  | 0.31    | 0.58    |
| PF3D7_1023800   | conserved Plasmodium protein, unknown function                                  | 1.44  | 1.19    | 2.93    |
| PF3D7_1023900   | chromodomain-helicase-DNA-binding protein 1 homolog, putative (CHD1)            | 0.38  | 474.81  | 558.88  |
| PF3D7_1024000   | conserved Plasmodium protein, unknown function                                  | 0.77  | 10.42   | 16.06   |
| PF3D7_1024100   | conserved Plasmodium protein, unknown function                                  | 1.40  | 1.68    | 4.01    |
| PF3D7_1024200   | RNA-binding protein, putative                                                   | 1.95  | 3.34    | 11.73   |
| PF3D7_1024300   | conserved Plasmodium protein, unknown function                                  | 0.52  | 19.09   | 24.73   |
| PF3D7_1024400   | conserved Plasmodium protein, unknown function                                  | 0.28  | 3.71    | 4.07    |
| PF3D7_1024500   | conserved Plasmodium protein, unknown function                                  | 0.35  | 8.51    | 9.79    |
| PF3D7_1024600   | RAP protein, putative                                                           | 1.02  | 1.67    | 3.08    |
| PF3D7_1024700   | conserved Plasmodium protein, unknown function                                  | 0.43  | 6.88    | 8.34    |
| PF3D7_1024800   | conserved Plasmodium protein, unknown function                                  | -1.29 | 1478.14 | 545.34  |
| PF3D7_1024900   | conserved Plasmodium protein, unknown function                                  | 0.17  | 2.36    | 2.40    |
| PF3D7_1025000   | fornin 2, putative                                                              | 0.33  | 106.02  | 120.16  |
| PF3D7_1025100   | glutamine--fructose-6-phosphate aminotransferase [isomerizing], putative (GFPT) | 0.52  | 52.74   | 68.01   |
| PF3D7_1025200   | conserved Plasmodium protein, unknown function                                  | -0.05 | 5.71    | 4.97    |
| PF3D7_1025300   | conserved Plasmodium protein, unknown function                                  | -1.07 | 7.36    | 3.15    |
| PF3D7_1025400   | conserved Plasmodium membrane protein, unknown function                         | 0.05  | 20.72   | 19.30   |
| PF3D7_1025500   | conserved Plasmodium protein, unknown function                                  | 1.02  | 0.91    | 1.68    |
| PF3D7_1025600   | cytochrome c oxidase copper chaperone, putative (COX17)                         | 0.25  | 9.22    | 9.93    |
| PF3D7_1025700   | conserved Plasmodium protein, unknown function                                  | 1.10  | 15.37   | 29.81   |
| PF3D7_1025800   | conserved Plasmodium protein, unknown function                                  | 0.24  | 2.75    | 2.94    |
| PF3D7_1025900   | conserved Plasmodium protein, unknown function                                  | 0.21  | 36.15   | 37.62   |
| PF3D7_1026000   | conserved Plasmodium protein, unknown function                                  | -0.62 | 74.89   | 43.95   |
| PF3D7_1026100   | conserved Plasmodium protein, unknown function                                  | -1.26 | 3.83    | 1.42    |
| PF3D7_1026200   | conserved Plasmodium protein, unknown function                                  | 1.64  | 1.53    | 4.33    |
| PF3D7_1026300   | conserved Plasmodium protein, unknown function                                  | 1.41  | 2.77    | 6.63    |
| PF3D7_1026400   | cell division cycle protein 20 homolog, putative (CDC20)                        | 1.09  | 2.15    | 4.13    |
| PF3D7_1026500   | conserved Plasmodium protein, unknown function                                  | 1.52  | 3.79    | 9.95    |
| PF3D7_1026600   | conserved Plasmodium protein, unknown function                                  | 1.82  | 34.10   | 108.95  |
| PF3D7_1026800   | 40S ribosomal protein S2 (RPS2)                                                 | 0.23  | 2441.53 | 2586.08 |
| PF3D7_1026900   | biotin--acetyl-CoA-carboxylase, putative                                        | 1.11  | 1.82    | 3.57    |
| PF3D7_1027000   | conserved Plasmodium protein, unknown function                                  | 0.97  | 1.85    | 3.27    |
| PF3D7_1027100   | U3 small nucleolar ribonucleoprotein protein MPP10, putative (MPP10)            | 0.17  | 92.74   | 93.83   |
| PF3D7_1027200   | mitochondrial ribosomal protein S22 precursor, putative                         | -0.14 | 36.73   | 30.04   |
| PF3D7_1027300   | peroxiredoxin (nPrx)                                                            | 1.25  | 630.73  | 1353.00 |
| PF3D7_1027400   | DNA-directed RNA polymerase II, putative                                        | -0.52 | 107.47  | 67.45   |
| PF3D7_1027500   | conserved Plasmodium protein, unknown function                                  | -0.31 | 6.55    | 4.73    |
| PF3D7_1027600   | topoisomerase, putative                                                         | 0.44  | 3.70    | 4.53    |
| PF3D7_1027700.1 | centrin-3 (CEN3)                                                                | 0.72  | 22.44   | 33.27   |
| PF3D7_1027700.2 | centrin-3 (CEN3)                                                                | 0.72  | 22.23   | 33.14   |
| PF3D7_1027800   | 60S ribosomal protein L3 (RPL3)                                                 | 0.13  | 1871.17 | 1851.67 |
| PF3D7_1027900   | palmitoyltransferase, putative (DHHC10)                                         | -0.46 | 6.42    | 4.21    |
| PF3D7_1028000   | methyltransferase, putative                                                     | -0.36 | 56.00   | 39.35   |
| PF3D7_1028100   | protoporphyrinogen oxidase (PPO)                                                | -0.27 | 1.55    | 1.16    |
| PF3D7_1028200   | zinc finger, C3HC4 type, putative                                               | 0.49  | 11.59   | 14.74   |
| PF3D7_1028300   | rRNA-processing protein EBP2, putative (EBP2)                                   | 0.01  | 84.35   | 76.82   |
| PF3D7_1028400   | nucleolar preribosomal assembly protein, putative                               | -0.52 | 103.25  | 65.03   |
| PF3D7_1028500   | conserved Plasmodium protein, unknown function                                  | -0.87 | 54.78   | 27.06   |
| PF3D7_1028600   | conserved Plasmodium protein, unknown function                                  | 0.86  | 19.88   | 32.58   |
| PF3D7_1028700   | merozoite TRAP-like protein (MTRAP)                                             | 1.88  | 39.01   | 129.44  |
| PF3D7_1028800   | conserved Plasmodium protein, unknown function                                  | 0.63  | 23.48   | 32.79   |
| PF3D7_1028900   | inner membrane complex protein 1m, putative (IMC1m)                             | 0.56  | 10.76   | 14.30   |
| PF3D7_1029000   | conserved Plasmodium protein, unknown function, pseudogene                      | 0.99  | 0.32    | 0.59    |
| PF3D7_1029100.1 | conserved Plasmodium protein, unknown function                                  | 0.92  | 1.07    | 1.82    |

|                 |                                                                                 |       |         |         |
|-----------------|---------------------------------------------------------------------------------|-------|---------|---------|
| PF3D7_1029100.2 | conserved Plasmodium protein, unknown function                                  | 0.91  | 1.07    | 1.82    |
| PF3D7_1029200   | WD repeat-containing protein, putative                                          | -1.65 | 34.59   | 9.97    |
| PF3D7_1029300   | conserved Plasmodium protein, unknown function                                  | 1.03  | 6.13    | 11.26   |
| PF3D7_1029400   | conserved Plasmodium protein, unknown function                                  | -0.48 | 44.41   | 28.72   |
| PF3D7_1029500   | conserved Plasmodium protein, unknown function                                  | -1.47 | 0.97    | 0.28    |
| PF3D7_1029600   | adenosine deaminase (ADA)                                                       | 0.67  | 402.69  | 579.84  |
| PF3D7_1029700   | conserved Plasmodium protein, unknown function                                  | 1.22  | 0.73    | 1.54    |
| PF3D7_1029800   | RAP protein, putative                                                           | 0.86  | 11.95   | 19.52   |
| PF3D7_1029900   | conserved Plasmodium protein, unknown function                                  | -0.75 | 40.69   | 21.90   |
| PF3D7_1030000   | transcription elongation factor SPT4, putative (SPT4)                           | 0.51  | 149.33  | 191.86  |
| PF3D7_1030100   | pre-mRNA-splicing factor ATP-dependent RNA helicase PRP22, putative (PRP22)     | 0.29  | 78.53   | 86.55   |
| PF3D7_1030200   | conserved Plasmodium protein, unknown function                                  | 1.60  | 32.96   | 90.20   |
| PF3D7_1030300   | conserved Plasmodium protein, unknown function                                  | -0.49 | 56.23   | 36.13   |
| PF3D7_1030400   | conserved Plasmodium protein, unknown function                                  | -0.26 | 9.88    | 7.46    |
| PF3D7_1030500   | 26S proteasome regulatory subunit RPN9, putative (RPN9)                         | -0.60 | 62.33   | 37.02   |
| PF3D7_1030600   | tRNA N6-adenosine threonylcarbamoyltransferase (KAE1)                           | -0.26 | 60.38   | 45.51   |
| PF3D7_1030700   | RNA methyltransferase, putative                                                 | -0.89 | 48.71   | 23.65   |
| PF3D7_1030800   | calmodulin, putative                                                            | -0.29 | 15.11   | 11.17   |
| PF3D7_1030900   | 28 kDa ookinete surface protein (P28)                                           | 0.29  | 15.04   | 16.58   |
| PF3D7_1031000   | 25 kDa ookinete surface antigen precursor (Pfs25)                               | 0.53  | 6.03    | 7.85    |
| PF3D7_1031100   | conserved Plasmodium protein, unknown function                                  | -1.21 | 11.42   | 4.44    |
| PF3D7_1031200   | MORN repeat-containing protein 1 (MORN1)                                        | 0.79  | 19.29   | 30.08   |
| PF3D7_1031300   | conserved Plasmodium protein, unknown function                                  | 0.07  | 8.19    | 7.76    |
| PF3D7_1031400.1 | OTU-like cysteine protease, putative                                            | 0.38  | 13.21   | 15.49   |
| PF3D7_1031400.2 | OTU-like cysteine protease, putative                                            | 0.39  | 13.12   | 15.48   |
| PF3D7_1031500   | DEAD/DEAH box helicase, putative                                                | -0.03 | 54.15   | 47.87   |
| PF3D7_1031600   | conserved Plasmodium protein, unknown function (GEXP15)                         | 0.19  | 54.59   | 56.04   |
| PF3D7_1031700   | protein phosphatase inhibitor 3 (I3)                                            | 0.77  | 34.97   | 53.93   |
| PF3D7_1031800   | conserved Plasmodium protein, unknown function                                  | 0.29  | 10.78   | 11.93   |
| PF3D7_1031900   | conserved Plasmodium protein, unknown function                                  | 1.45  | 1.50    | 3.73    |
| PF3D7_1032000   | ribosome maturation factor RimM, putative (RimM)                                | 0.24  | 8.75    | 9.33    |
| PF3D7_1032100   | mRNA-decapping enzyme subunit 1, putative (DCP1)                                | -1.06 | 150.79  | 65.26   |
| PF3D7_1032200   | conserved Plasmodium protein, unknown function                                  | -1.21 | 1.61    | 0.59    |
| PF3D7_1032300   | conserved Plasmodium protein, unknown function                                  | 0.46  | 2.15    | 2.68    |
| PF3D7_1032400   | phosphatidylinositol N-acetylglucosaminyltransferase subunit A, putative (PIGA) | 0.89  | 13.32   | 22.27   |
| PF3D7_1032500   | DER1-like protein, putative (Der1-2)                                            | -0.17 | 41.12   | 32.95   |
| PF3D7_1032600   | conserved protein, unknown function                                             | -0.59 | 3.34    | 1.99    |
| PF3D7_1032700   | conserved Plasmodium protein, unknown function                                  | 0.28  | 43.09   | 47.18   |
| PF3D7_1032800   | leucine-rich repeat protein (LRR1)                                              | -0.24 | 6.33    | 4.83    |
| PF3D7_1032900   | RNA polymerase II-associated protein 1, putative                                | -0.94 | 13.92   | 6.53    |
| PF3D7_1033000   | conserved Plasmodium protein, unknown function                                  | 0.34  | 15.23   | 17.43   |
| PF3D7_1033100   | S-adenosylmethionine decarboxylase/ornithine decarboxylase (AdoMetDC/ODC)       | -0.72 | 937.67  | 514.27  |
| PF3D7_1033200   | early transcribed membrane protein 10.2 (ETRAMP10.2)                            | -0.46 | 185.09  | 121.53  |
| PF3D7_1033300   | conserved Plasmodium protein, unknown function                                  | 0.80  | 32.29   | 50.74   |
| PF3D7_1033400   | haloacid dehalogenase-like hydrolase (HAD1)                                     | -0.58 | 504.21  | 305.18  |
| PF3D7_1033500   | WD repeat-containing protein 70, putative (WDR70)                               | -1.11 | 56.27   | 23.52   |
| PF3D7_1033600   | myb2 transcription factor, putative (Myb2)                                      | 0.02  | 139.17  | 127.55  |
| PF3D7_1033700   | bromodomain protein 1 (BDP1)                                                    | -0.33 | 114.62  | 82.39   |
| PF3D7_1033800   | plasmepsin VII                                                                  | 0.01  | 0.83    | 0.75    |
| PF3D7_1033900   | ubiquitin-conjugating enzyme, putative                                          | 0.33  | 47.64   | 54.10   |
| PF3D7_1034000   | Sec1 family protein, putative                                                   | -0.84 | 38.76   | 19.49   |
| PF3D7_1034100   | conserved Plasmodium protein, unknown function                                  | -0.07 | 0.58    | 0.49    |
| PF3D7_1034200   | apicoplast ribosomal protein L27 precursor, putative                            | 0.13  | 3.54    | 3.50    |
| PF3D7_1034300   | thioredoxin-like associated protein 2, putative (TLAP2)                         | 1.69  | 0.07    | 0.23    |
| PF3D7_1034400   | flavoprotein subunit of succinate dehydrogenase (SDHA)                          | 1.21  | 11.58   | 24.21   |
| PF3D7_1034500   | conserved Plasmodium protein, unknown function                                  | 0.19  | 7.40    | 7.64    |
| PF3D7_1034600   | translation initiation factor IF-3, putative (IF3b)                             | -0.05 | 21.13   | 18.39   |
| PF3D7_1034700   | ADP-ribosylation factor, putative                                               | -0.44 | 28.24   | 18.74   |
| PF3D7_1034800   | conserved Plasmodium protein, unknown function                                  | 0.00  | 6.16    | 5.54    |
| PF3D7_1034900   | methionine-tRNA ligase (MRScty)                                                 | -0.08 | 149.13  | 127.43  |
| PF3D7_1035000   | U2 snRNA/tRNA pseudouridine synthase, putative                                  | -0.35 | 12.20   | 8.65    |
| PF3D7_1035100   | probable protein, unknown function                                              | 0.35  | 32.31   | 37.14   |
| PF3D7_1035200   | S-antigen                                                                       | -0.08 | 7634.79 | 6528.10 |
| PF3D7_1035300   | glutamate-rich protein (GLURP)                                                  | 2.45  | 58.20   | 287.81  |
| PF3D7_1035400   | merozoite surface protein 3 (MSP3)                                              | 2.14  | 242.86  | 962.87  |
| PF3D7_1035500   | merozoite surface protein 6 (MSP6)                                              | 2.03  | 152.18  | 560.56  |
| PF3D7_1035600   | merozoite surface protein (H101)                                                | 0.72  | 20.33   | 30.29   |
| PF3D7_1035700   | duffy binding-like merozoite surface protein (DBLMSP)                           | 1.13  | 140.17  | 276.10  |
| PF3D7_1035800   | probable protein, unknown function (M712)                                       | -4.28 | 528.48  | 24.49   |
| PF3D7_1035900   | probable protein, unknown function (M566)                                       | 1.44  | 127.97  | 313.26  |
| PF3D7_1036000   | merozoite surface protein (MSP11)                                               | 2.25  | 26.52   | 113.94  |
| PF3D7_1036300   | merozoite surface protein (DBLMSP2)                                             | 1.72  | 9.02    | 26.80   |
| PF3D7_1036400   | liver stage antigen 1 (LSA1)                                                    | 1.87  | 1.52    | 5.00    |
| PF3D7_1036500   | probable protein, unknown function                                              | 1.89  | 32.48   | 108.63  |
| PF3D7_1036600.1 | conserved Plasmodium protein, unknown function                                  | 1.30  | 2.47    | 5.52    |
| PF3D7_1036600.2 | conserved Plasmodium protein, unknown function                                  | 1.31  | 2.47    | 5.56    |
| PF3D7_1036700   | phosducin-like protein, putative (PhLP2)                                        | 1.15  | 5.17    | 10.41   |
| PF3D7_1036800   | acetyl-CoA transporter, putative                                                | -0.41 | 16.35   | 11.08   |
| PF3D7_1036900   | conserved Plasmodium protein, unknown function                                  | -0.23 | 375.95  | 290.04  |
| PF3D7_1037000   | DNA polymerase zeta catalytic subunit, putative                                 | 0.68  | 5.78    | 8.37    |
| PF3D7_1037100   | pyruvate kinase 2 (PyKII)                                                       | 0.60  | 8.55    | 11.69   |
| PF3D7_1037200   | conserved Plasmodium protein, unknown function                                  | 0.62  | 1.14    | 1.58    |
| PF3D7_1037300   | ADP/ATP transporter on adenylate translocase (ADT)                              | -0.02 | 439.39  | 391.69  |
| PF3D7_1037400   | conserved Plasmodium protein, unknown function                                  | 0.62  | 1.63    | 2.26    |
| PF3D7_1037500   | dynammin-like protein (DYN2)                                                    | 0.23  | 17.98   | 19.00   |
| PF3D7_1037600   | DNA repair helicase RAD25, putative                                             | -0.27 | 81.67   | 60.91   |
| PF3D7_1037700   | enhancer of rudimentary homolog, putative (ERH)                                 | -1.60 | 85.58   | 25.42   |
| PF3D7_1037800   | dynein intermediate chain, putative                                             | 0.77  | 0.70    | 1.09    |
| PF3D7_1037900   | conserved Plasmodium protein, unknown function                                  | -2.37 | 9.30    | 1.59    |
| PF3D7_1038000.1 | antigen UB05                                                                    | 0.92  | 696.01  | 1186.62 |
| PF3D7_1038000.2 | antigen UB05                                                                    | 0.91  | 699.45  | 1185.51 |
| PF3D7_1038100   | GDP dissociation inhibitor, putative                                            | -1.19 | 24.27   | 9.60    |
| PF3D7_1038200   | conserved Plasmodium protein, unknown function                                  | -1.00 | 13.41   | 5.99    |
| PF3D7_1038300   | conserved Plasmodium protein, unknown function                                  | -0.23 | 0.14    | 0.10    |
| PF3D7_1038400   | gametocyte-specific protein (Pfl1-1)                                            | 1.85  | 0.91    | 2.98    |
| PF3D7_1038500   | Plasmodium exported protein, unknown function                                   | -0.39 | 2.53    | 1.74    |
| PF3D7_1038600   | Plasmodium exported protein, unknown function                                   | 0.15  | 1.01    | 1.01    |
| PF3D7_1038700   | Plasmodium exported protein, unknown function                                   | -0.88 | 13.05   | 6.40    |

|                 |                                                                    |       |          |          |
|-----------------|--------------------------------------------------------------------|-------|----------|----------|
| PF3D7_1038800   | RESA-like protein with PHIST and DnaJ domains                      | -0.79 | 82.48    | 43.03    |
| PF3D7_1038900   | lysophospholipase, putative                                        | -0.26 | 5.14     | 3.86     |
| PF3D7_1039000   | serine/threonine protein kinase, FIKK family (FIKK10.2)            | -0.90 | 138.45   | 67.08    |
| PF3D7_1039100   | DnaJ protein, putative, pseudogene                                 | 0.81  | 3.69     | 5.84     |
| PF3D7_1039200   | Plasmodium exported protein, unknown function, pseudogene          | 0.42  | 4.50     | 5.44     |
| PF3D7_1039300   | unspecified product                                                | 1.12  | 3.05     | 6.00     |
| PF3D7_1039400   | erythrocyte membrane protein 1 (PfEMP1), pseudogene                | -0.53 | 1.68     | 1.04     |
| PF3D7_1039600   | exported protein family 1, pseudogene (EPF1)                       | -3.75 | 6.60     | 0.42     |
| PF3D7_1039700   | Pfmc-2TM Maurer's cleft two transmembrane protein (MC-2TM)         | 1.43  | 0.77     | 1.92     |
| PF3D7_1039800   | exported protein family 3 (EPF3)                                   | -0.83 | 99.33    | 50.45    |
| PF3D7_1039900   | exported protein family 4 (EPF4)                                   | -1.04 | 130.41   | 57.07    |
| PF3D7_1040000   | rifin (RIF)                                                        | 0.02  | 0.17     | 0.15     |
| PF3D7_1040100   | rifin (RIF)                                                        | -0.59 | 0.26     | 0.15     |
| PF3D7_1040200   | stevor                                                             | 2.81  | 0.15     | 1.05     |
| PF3D7_1040300   | rifin (RIF)                                                        | 1.33  | 0.45     | 1.05     |
| PF3D7_1040400   | rifin (RIF)                                                        | -0.81 | 0.19     | 0.09     |
| PF3D7_1040500   | rifin (RIF)                                                        | 1.77  | 0.00     | 0.04     |
| PF3D7_1040600   | rifin (RIF)                                                        | -2.13 | 0.09     | 0.00     |
| PF3D7_1040700   | rifin (RIF)                                                        | -0.13 | 0.08     | 0.06     |
| PF3D7_1040800   | rifin (RIF)                                                        | -2.13 | 0.10     | 0.00     |
| PF3D7_1040900   | rifin (RIF)                                                        | 2.51  | 0.00     | 0.10     |
| PF3D7_1041000   | rifin (RIF)                                                        | 0.60  | 0.16     | 0.23     |
| PF3D7_1041100   | rifin (RIF)                                                        | 1.19  | 0.11     | 0.25     |
| PF3D7_1041200   | rifin (RIF)                                                        | -0.17 | 0.16     | 0.12     |
| PF3D7_1041300   | erythrocyte membrane protein 1, PfEMP1 (VAR)                       | 0.66  | 1.44     | 2.06     |
| PF3D7_1100100   | erythrocyte membrane protein 1, PfEMP1 (VAR)                       | 0.86  | 5.62     | 9.22     |
| PF3D7_1100200   | erythrocyte membrane protein 1, PfEMP1 (VAR)                       | -0.67 | 2.41     | 1.37     |
| PF3D7_1100300   | rifin (RIF)                                                        | 0.27  | 0.35     | 0.38     |
| PF3D7_1100400   | rifin (RIF)                                                        | 3.51  | 0.00     | 0.21     |
| PF3D7_1100500   | rifin (RIF)                                                        | 0.91  | 0.36     | 0.63     |
| PF3D7_1100600   | Plasmodium exported protein (PHISTa), unknown function, pseudogene | 0.19  | 0.00     | 0.00     |
| PF3D7_1100700   | stevor, pseudogene                                                 | 2.19  | 0.00     | 0.08     |
| PF3D7_1100800   | Pfmc-2TM Maurer's cleft two transmembrane protein (MC-2TM)         | 2.19  | 0.32     | 1.42     |
| PF3D7_1100900   | RESA-like protein, pseudogene                                      | -0.95 | 0.27     | 0.11     |
| PF3D7_1101000   | erythrocyte membrane protein 1 (PfEMP1), truncated                 | 4.10  | 0.00     | 0.80     |
| PF3D7_1101100   | rifin (RIF)                                                        | 0.21  | 1.62     | 1.69     |
| PF3D7_1101200   | rifin (RIF)                                                        | -2.06 | 0.38     | 0.06     |
| PF3D7_1101300   | rifin (RIF)                                                        | 1.05  | 0.23     | 0.44     |
| PF3D7_1101400   | rifin, pseudogene (RIF)                                            | 1.37  | 0.37     | 0.89     |
| PF3D7_1101500   | exported protein family 4 (EPF4)                                   | -0.27 | 98.88    | 73.98    |
| PF3D7_1101600   | exported protein family 3 (EPF3)                                   | 0.04  | 61.70    | 57.06    |
| PF3D7_1101700   | Pfmc-2TM Maurer's cleft two transmembrane protein (MC-2TM)         | 2.35  | 0.87     | 4.10     |
| PF3D7_1101800   | exported protein family 1 (EPF1)                                   | -1.87 | 11.61    | 2.85     |
| PF3D7_1101900   | erythrocyte membrane protein 1 (PfEMP1), truncated, pseudogene     | -0.30 | 0.68     | 0.48     |
| PF3D7_1102000   | unspecified product                                                | 0.04  | 0.25     | 0.23     |
| PF3D7_1102100   | Plasmodium exported protein, unknown function, pseudogene          | 1.05  | 3.41     | 6.41     |
| PF3D7_1102200   | DnaJ protein, putative                                             | 0.85  | 1.26     | 2.06     |
| PF3D7_1102300   | Plasmodium exported protein, unknown function                      | 1.98  | 6.96     | 24.76    |
| PF3D7_1102400   | flavoprotein, putative                                             | -1.44 | 33.27    | 11.03    |
| PF3D7_1102500   | Plasmodium exported protein (PHISTb), unknown function (GEXP02)    | 0.75  | 8.90     | 13.50    |
| PF3D7_1102600   | Plasmodium exported protein, unknown function (GEXP14)             | -0.39 | 5.68     | 3.89     |
| PF3D7_1102700   | early transcribed membrane protein 11.1 (ETRAPM11.1)               | -0.31 | 1235.47  | 898.42   |
| PF3D7_1102800   | early transcribed membrane protein 11.2 (ETRAPM11.2)               | 0.42  | 11199.40 | 13550.20 |
| PF3D7_1102900   | Plasmodium exported protein (hyp1), unknown function               | -0.59 | 44.45    | 26.62    |
| PF3D7_1103000   | conserved Plasmodium protein, unknown function                     | -0.23 | 5.36     | 4.09     |
| PF3D7_1103100   | 60S acidic ribosomal protein P1, putative (RPP1)                   | 0.47  | 832.99   | 1042.22  |
| PF3D7_1103200   | tRNA Glycine                                                       | 1.19  | 0.00     | 0.32     |
| PF3D7_1103300   | tRNA Leucine                                                       | 1.19  | 0.00     | 0.23     |
| PF3D7_1103400   | FeS cluster assembly protein SufD, putative (SufD)                 | 0.16  | 11.98    | 12.12    |
| PF3D7_1103500   | CPW-WPC family protein                                             | 2.10  | 0.47     | 1.87     |
| PF3D7_1103600   | actin-like protein, putative (ALP2a)                               | -0.36 | 28.12    | 19.76    |
| PF3D7_1103700   | casein kinase II beta chain (CK2beta1)                             | -0.45 | 127.72   | 84.07    |
| PF3D7_1103800   | CCR4-NOT transcription complex subunit 1, putative (NOT1)          | 1.17  | 11.22    | 22.77    |
| PF3D7_1103900   | conserved Plasmodium protein, unknown function                     | -1.55 | 18.43    | 5.57     |
| PF3D7_1104000   | phenylalanine-tRNA ligase beta subunit                             | -0.87 | 89.35    | 44.15    |
| PF3D7_1104100   | syntaxin, Qa-SNARE family (SYN13)                                  | -1.50 | 75.09    | 23.91    |
| PF3D7_1104200   | chromatin remodeling protein (SNF2L)                               | -1.24 | 190.97   | 73.14    |
| PF3D7_1104300   | conserved Plasmodium protein, unknown function                     | 0.29  | 19.35    | 21.32    |
| PF3D7_1104400   | conserved protein, unknown function                                | -0.83 | 252.79   | 128.63   |
| PF3D7_1104500   | WD repeat-containing protein, putative                             | 1.19  | 0.30     | 0.63     |
| PF3D7_1104600   | radial spoke head protein, putative                                | 1.91  | 0.66     | 2.26     |
| PF3D7_1104700.1 | RNA polymerase subunit, putative                                   | -0.14 | 49.19    | 40.23    |
| PF3D7_1104700.2 | RNA polymerase subunit, putative                                   | -0.15 | 49.36    | 40.00    |
| PF3D7_1104800   | metabolite/drug transporter, putative                              | -0.55 | 31.69    | 19.49    |
| PF3D7_1104900   | calcium/calmodulin-dependent protein kinase, putative              | 1.02  | 15.43    | 28.14    |
| PF3D7_1105000   | histone H4 (H4)                                                    | 1.48  | 820.17   | 2060.82  |
| PF3D7_1105100   | histone H2B (H2B)                                                  | 2.16  | 1085.56  | 4387.35  |
| PF3D7_1105200   | WD repeat-containing protein WRAP73, putative (WDR8)               | 1.22  | 0.79     | 1.67     |
| PF3D7_1105300   | conserved Plasmodium protein, unknown function                     | -0.91 | 21.66    | 10.39    |
| PF3D7_1105400   | 40S ribosomal protein S4, putative                                 | -0.06 | 1654.44  | 1431.64  |
| PF3D7_1105500   | centrin-4 (CEN4)                                                   | 0.54  | 15.67    | 20.58    |
| PF3D7_1105600   | translocon component PTEX88 (PTEX88)                               | -1.55 | 268.59   | 82.71    |
| PF3D7_1105700   | tRNA-splicing ligase RtcB, putative (RTCB)                         | 0.37  | 107.55   | 125.40   |
| PF3D7_1105800   | conserved Plasmodium protein, unknown function                     | -0.14 | 85.18    | 69.90    |
| PF3D7_1105900   | conserved Plasmodium membrane protein, unknown function            | -0.30 | 17.23    | 12.64    |
| PF3D7_1106000   | RuvB-like helicase 2 (RUVB2)                                       | -0.39 | 123.32   | 84.83    |
| PF3D7_1106100   | apicoplast ribosomal protein S15 precursor, putative               | 0.33  | 13.05    | 14.81    |
| PF3D7_1106200   | conserved Plasmodium protein, unknown function                     | -0.80 | 3.46     | 1.79     |
| PF3D7_1106300   | exonuclease, putative                                              | 0.45  | 18.49    | 22.83    |
| PF3D7_1106400   | conserved Plasmodium protein, unknown function                     | 0.12  | 5.68     | 5.58     |
| PF3D7_1106500   | conserved Plasmodium protein, unknown function                     | -0.54 | 19.97    | 12.41    |
| PF3D7_1106600   | DEAD/DEAH box helicase, putative                                   | 0.67  | 3.21     | 4.62     |
| PF3D7_1106700   | dna2/nam7 helicase family member, putative                         | -0.11 | 27.34    | 22.78    |
| PF3D7_1106800   | protein kinase, putative                                           | -0.09 | 11.18    | 9.47     |
| PF3D7_1106900   | conserved Plasmodium protein, unknown function                     | 0.01  | 8.66     | 7.86     |
| PF3D7_1107000   | U6 snRNA-associated Sm-like protein LSM4, putative (LSM4)          | 1.02  | 24.34    | 44.43    |
| PF3D7_1107100   | nucleic acid binding protein, putative                             | 0.03  | 24.16    | 22.29    |
| PF3D7_1107200   | conserved Plasmodium protein, unknown function                     | -0.07 | 29.04    | 24.94    |

|                 |                                                                                              |       |         |        |
|-----------------|----------------------------------------------------------------------------------------------|-------|---------|--------|
| PF3D7_1107300   | polyadenylate-binding protein-interacting protein 1, putative (PAIP1)                        | -0.56 | 318.10  | 194.65 |
| PF3D7_1107400   | DNA repair protein RAD51 (RAD51)                                                             | 1.03  | 30.04   | 55.53  |
| PF3D7_1107500   | prefoldin, putative                                                                          | -0.13 | 17.90   | 14.76  |
| PF3D7_1107600   | conserved Plasmodium protein, unknown function                                               | -0.87 | 0.82    | 0.40   |
| PF3D7_1107700   | pescadillo homolog (PES)                                                                     | -0.27 | 104.02  | 77.57  |
| PF3D7_1107800   | transcription factor with AP2 domain(s) (ApiAP2)                                             | -0.51 | 98.87   | 62.73  |
| PF3D7_1107900   | mechanosensitive ion channel protein                                                         | 0.49  | 6.87    | 8.69   |
| PF3D7_1108000   | IWS1-like protein, putative                                                                  | 0.36  | 115.96  | 134.55 |
| PF3D7_1108100   | conserved Plasmodium protein, unknown function                                               | 0.41  | 19.71   | 23.69  |
| PF3D7_1108200   | D-tyrosyl-tRNA(Tyr) deacylase (DTD)                                                          | -0.71 | 42.22   | 23.22  |
| PF3D7_1108300   | pterin-4a-carbinolamine dehydratase (PCD)                                                    | 0.46  | 7.95    | 9.88   |
| PF3D7_1108400   | casein kinase 2, alpha subunit (CK2alpha)                                                    | -0.12 | 304.24  | 251.94 |
| PF3D7_1108500   | succinyl-CoA synthetase alpha subunit, putative                                              | 1.32  | 37.38   | 84.00  |
| PF3D7_1108600   | endoplasmic reticulum-resident calcium binding protein (ERC)                                 | 0.02  | 662.14  | 607.17 |
| PF3D7_1108700   | heat shock protein DnaJ homologue Pfj2                                                       | -0.28 | 253.39  | 187.77 |
| PF3D7_1108800   | conserved Plasmodium protein, unknown function                                               | -2.41 | 5.17    | 0.84   |
| PF3D7_1108900   | conserved Plasmodium protein, unknown function                                               | -1.47 | 19.20   | 6.24   |
| PF3D7_1109000   | small nucleolar RNA snoR07                                                                   | -0.51 | 2.54    | 1.52   |
| PF3D7_1109100   | conserved Plasmodium protein, unknown function                                               | 0.18  | 0.92    | 0.94   |
| PF3D7_1109200   | pre-mRNA splicing factor, putative                                                           | -0.03 | 3.58    | 3.16   |
| PF3D7_1109300   | small nucleolar RNA snR61/Z1/Z11                                                             | 0.77  | 0.33    | 0.68   |
| PF3D7_1109400   | U3/U14 snoRNA-associated small subunit rRNA processing protein, putative                     | -0.17 | 224.44  | 179.95 |
| PF3D7_1109500   | small nucleolar RNA snoR09                                                                   | 1.10  | 6.06    | 11.92  |
| PF3D7_1109600   | small nucleolar RNA SNORD127                                                                 | -0.40 | 78.26   | 53.27  |
| PF3D7_1109700   | small nucleolar RNA snoR11                                                                   | -2.17 | 4.97    | 0.91   |
| PF3D7_1109800   | small nucleolar RNA snoR12                                                                   | 1.19  | 0.00    | 0.27   |
| PF3D7_1109900   | 60S ribosomal protein L36 (RPL36)                                                            | -0.20 | 1064.28 | 835.67 |
| PF3D7_1110000   | conserved Plasmodium protein, unknown function                                               | 0.12  | 18.44   | 18.13  |
| PF3D7_1110100   | conserved Plasmodium protein, unknown function                                               | -1.35 | 37.95   | 13.44  |
| PF3D7_1110200   | pre-mRNA-processing factor 6, putative (PRPF6)                                               | 0.28  | 138.17  | 151.67 |
| PF3D7_1110300   | conserved Plasmodium protein, unknown function                                               | -0.29 | 117.18  | 86.21  |
| PF3D7_1110400   | asparagine-rich antigen                                                                      | -0.44 | 739.93  | 492.81 |
| PF3D7_1110500   | vacuolar protein sorting-associated protein 35, putative (VPS35)                             | 0.34  | 15.42   | 17.66  |
| PF3D7_1110600   | mitochondrial ribosomal protein L11 precursor, putative                                      | 1.43  | 24.99   | 60.60  |
| PF3D7_1110700   | actin-like protein, putative (ALP1)                                                          | 0.47  | 25.30   | 31.62  |
| PF3D7_1110800   | conserved Plasmodium protein, unknown function                                               | 0.70  | 1.63    | 2.39   |
| PF3D7_1110900   | ES2 protein, putative                                                                        | -0.22 | 65.01   | 50.39  |
| PF3D7_1111000   | tRNA m5C-methyltransferase, putative                                                         | -1.53 | 29.02   | 9.07   |
| PF3D7_1111100   | replication factor C subunit 5, putative (RFC5)                                              | 0.87  | 29.67   | 48.93  |
| PF3D7_1111200   | conserved Plasmodium protein, unknown function                                               | -0.33 | 18.50   | 13.26  |
| PF3D7_1111300   | SNARE protein, putative (GS27)                                                               | -1.55 | 20.91   | 6.43   |
| PF3D7_1111400   | conserved Plasmodium protein, unknown function                                               | -0.89 | 26.47   | 12.84  |
| PF3D7_1111500   | acylphosphatase, putative                                                                    | 0.56  | 20.73   | 27.52  |
| PF3D7_1111600   | endonuclease/exonuclease/phosphatase family protein, putative                                | 1.02  | 1.83    | 3.37   |
| PF3D7_1111700   | conserved Plasmodium protein, unknown function                                               | -1.29 | 13.00   | 4.80   |
| PF3D7_1111800   | peptidyl-prolyl cis-trans isomerase, putative                                                | 0.50  | 5.87    | 7.50   |
| PF3D7_1111900   | conserved Plasmodium protein, unknown function                                               | 0.19  | 4.13    | 4.24   |
| PF3D7_1112000   | conserved Plasmodium protein, unknown function                                               | -0.41 | 18.51   | 12.51  |
| PF3D7_1112100   | conserved Plasmodium protein, unknown function                                               | 0.14  | 18.16   | 18.12  |
| PF3D7_1112200   | ubiquinone biosynthesis protein COQ4, putative (COQ4)                                        | -0.62 | 2.37    | 1.38   |
| PF3D7_1112300   | conserved Plasmodium protein, unknown function                                               | 0.19  | 1.24    | 1.28   |
| PF3D7_1112400   | conserved Plasmodium protein, unknown function                                               | 0.51  | 8.40    | 10.80  |
| PF3D7_1112500   | conserved protein, unknown function                                                          | -1.66 | 38.54   | 11.01  |
| PF3D7_1112600   | DNA helicase, putative                                                                       | 0.58  | 7.42    | 10.05  |
| PF3D7_1112700   | conserved Plasmodium protein, unknown function                                               | 0.09  | 1.49    | 1.43   |
| PF3D7_1112800   | conserved protein, unknown function                                                          | -0.48 | 2.81    | 1.81   |
| PF3D7_1112900   | conserved Plasmodium protein, unknown function                                               | -0.11 | 3.63    | 3.04   |
| PF3D7_1113000   | conserved Plasmodium protein, unknown function                                               | -0.06 | 5.73    | 4.95   |
| PF3D7_1113100   | protein tyrosine phosphatase (PRL)                                                           | -0.61 | 438.75  | 259.18 |
| PF3D7_1113200   | conserved Plasmodium protein, unknown function                                               | -0.37 | 30.21   | 21.02  |
| PF3D7_1113300   | UDP-galactose transporter, putative                                                          | -0.45 | 25.96   | 17.14  |
| PF3D7_1113400   | ubiquitin domain-containing protein DSK2, putative (DSK2)                                    | -0.24 | 247.32  | 188.82 |
| PF3D7_1113500   | GTP-binding protein, putative                                                                | -0.43 | 24.55   | 16.43  |
| PF3D7_1113600   | conserved Plasmodium protein, unknown function                                               | -0.22 | 67.32   | 52.21  |
| PF3D7_1113700   | glyoxalase 1 (Glo1)                                                                          | -0.20 | 51.05   | 40.17  |
| PF3D7_1113800   | conserved Plasmodium membrane protein, unknown function                                      | -1.64 | 15.35   | 4.44   |
| PF3D7_1113900   | mitogen-activated protein kinase 2 (MAPK2)                                                   | 1.15  | 1.75    | 3.50   |
| PF3D7_1114000   | dynein light chain type 2, putative                                                          | 2.47  | 1.15    | 5.89   |
| PF3D7_1114100.1 | rhomboid protease ROM1 (ROM1)                                                                | 0.30  | 43.76   | 48.51  |
| PF3D7_1114100.2 | rhomboid protease ROM1 (ROM1)                                                                | 0.29  | 43.51   | 47.83  |
| PF3D7_1114200   | GTPase-activating protein, putative                                                          | -0.44 | 113.76  | 75.62  |
| PF3D7_1114300   | unspecified product                                                                          | -1.40 | 0.13    | 0.00   |
| PF3D7_1114400   | conserved Plasmodium protein, unknown function                                               | 0.31  | 1.50    | 1.67   |
| PF3D7_1114500   | conserved Plasmodium protein, unknown function                                               | 0.37  | 1.64    | 1.91   |
| PF3D7_1114600   | conserved Plasmodium protein, unknown function                                               | 0.74  | 1.22    | 1.85   |
| PF3D7_1114700   | serine/threonine protein kinase, putative (CLK3)                                             | 0.22  | 151.90  | 159.80 |
| PF3D7_1114800   | glycerol-3-phosphate dehydrogenase, putative (G3PDH)                                         | 0.96  | 3.04    | 5.36   |
| PF3D7_1114900   | conserved Plasmodium protein, unknown function                                               | -0.13 | 6.39    | 5.27   |
| PF3D7_1115000   | conserved Plasmodium protein, unknown function                                               | 1.49  | 7.21    | 18.40  |
| PF3D7_1115100   | conserved Plasmodium protein, unknown function                                               | 0.75  | 5.16    | 7.83   |
| PF3D7_1115200   | SET domain protein, putative (SET7)                                                          | -0.73 | 107.41  | 58.26  |
| PF3D7_1115300   | cysteine proteinase falcipain 2b (FP2B)                                                      | -1.27 | 215.48  | 80.53  |
| PF3D7_1115400   | cysteine proteinase falcipain 3 (FP3)                                                        | -0.91 | 231.96  | 111.21 |
| PF3D7_1115500   | transcription factor with AP2 domain(s), putative (ApiAP2)                                   | 0.33  | 38.07   | 43.15  |
| PF3D7_1115600   | peptidyl-prolyl cis-trans isomerase (CYP19B)                                                 | 0.23  | 166.36  | 176.29 |
| PF3D7_1115700   | cysteine proteinase falcipain 2a (FP2A)                                                      | -0.48 | 227.94  | 147.30 |
| PF3D7_1115800   | conserved Plasmodium protein, unknown function                                               | -0.43 | 614.78  | 412.15 |
| PF3D7_1115900   | palmitoyltransferase, putative (DHHC9)                                                       | 0.01  | 24.10   | 21.96  |
| PF3D7_1116000   | rhopty neck protein 4 (RON4)                                                                 | -0.66 | 302.83  | 173.10 |
| PF3D7_1116100   | serine esterase, putative                                                                    | 0.09  | 35.99   | 34.68  |
| PF3D7_1116200.1 | pyridoxine biosynthesis protein PDX2 (PDX2)                                                  | -1.38 | 38.52   | 13.36  |
| PF3D7_1116200.2 | pyridoxine biosynthesis protein PDX2 (PDX2)                                                  | -1.34 | 40.08   | 14.30  |
| PF3D7_1116300   | peptidyl-prolyl cis-trans isomerase (CYP19C)                                                 | 0.45  | 75.87   | 93.35  |
| PF3D7_1116400   | guanine nucleotide-exchange factor SEC12 (SEC12)                                             | -0.74 | 115.64  | 62.65  |
| PF3D7_1116500   | folate transporter 2 (FT2)                                                                   | -0.59 | 31.00   | 18.52  |
| PF3D7_1116600   | dolichyl-diphosphooligosaccharide--protein glycosyltransferase subunit STT3, putative (STT3) | -0.04 | 18.05   | 15.83  |
| PF3D7_1116700   | dipeptidyl aminopeptidase 1 (DPAP1)                                                          | -0.09 | 613.98  | 521.91 |
| PF3D7_1116800   | heat shock protein 101 (HSP101)                                                              | -1.24 | 898.50  | 343.55 |

|                 |                                                                                 |       |         |         |
|-----------------|---------------------------------------------------------------------------------|-------|---------|---------|
| PF3D7_1116900   | conserved Plasmodium protein, unknown function                                  | 1.55  | 4.80    | 12.72   |
| PF3D7_1117000   | conserved Plasmodium membrane protein, unknown function                         | 0.14  | 2.02    | 2.01    |
| PF3D7_1117100   | deubiquinating/deneddylating enzyme (UCH54)                                     | -0.47 | 27.45   | 17.89   |
| PF3D7_1117200   | conserved Plasmodium protein, unknown function                                  | 1.27  | 0.47    | 1.04    |
| PF3D7_1117300   | conserved Plasmodium protein, unknown function                                  | -2.48 | 118.83  | 19.10   |
| PF3D7_1117400   | conserved Plasmodium protein, unknown function                                  | 0.84  | 36.08   | 58.15   |
| PF3D7_1117500   | tyrosine--tRNA ligase                                                           | -0.25 | 7.08    | 5.37    |
| PF3D7_1117600.1 | peptidyl-tRNA hydrolase ICT1, putative (ICT1)                                   | 1.07  | 8.82    | 16.75   |
| PF3D7_1117600.2 | peptidyl-tRNA hydrolase ICT1, putative (ICT1)                                   | 1.22  | 8.66    | 18.28   |
| PF3D7_1117700   | GTP-binding nuclear protein RAN/TC4 (RAN)                                       | 0.20  | 1171.48 | 1212.84 |
| PF3D7_1117800   | DNA mismatch repair protein MLH (MLH)                                           | -0.03 | 25.49   | 22.49   |
| PF3D7_1117900   | conserved Plasmodium protein, unknown function                                  | 0.00  | 12.56   | 11.30   |
| PF3D7_1118000   | conserved Plasmodium protein, unknown function                                  | 0.17  | 19.32   | 19.67   |
| PF3D7_1118100   | AP-1 complex subunit sigma, putative                                            | -1.23 | 56.57   | 21.75   |
| PF3D7_1118200   | heat shock protein 90, putative                                                 | -0.03 | 48.26   | 42.66   |
| PF3D7_1118300   | insulinase, putative                                                            | -0.51 | 282.49  | 178.70  |
| PF3D7_1118400   | haloacid dehalogenase-like hydrolase, putative                                  | -0.94 | 47.09   | 22.13   |
| PF3D7_1118500   | box C/D snoRNP rRNA 2'-O-methylation factor, putative                           | -0.35 | 245.59  | 174.24  |
| PF3D7_1118600   | histone acetyltransferase (MYST)                                                | -0.57 | 92.48   | 56.09   |
| PF3D7_1118700   | myosin light chain B (MLC-B)                                                    | 0.96  | 25.52   | 44.78   |
| PF3D7_1118800   | actin-related protein 2/3 complex subunit 1, putative (ARC40)                   | 0.99  | 3.09    | 5.56    |
| PF3D7_1118900   | conserved Plasmodium protein, unknown function                                  | -0.33 | 1.26    | 0.89    |
| PF3D7_1119000   | acyl-CoA-binding protein, putative                                              | 0.39  | 21.62   | 25.51   |
| PF3D7_1119100   | tRNA m(1)G methyltransferase, putative                                          | -0.14 | 13.65   | 11.15   |
| PF3D7_1119200   | conserved protein, unknown function                                             | -1.76 | 41.68   | 11.08   |
| PF3D7_1119300   | splicing factor U2AF small subunit, putative (U2AF1)                            | 0.56  | 158.72  | 210.94  |
| PF3D7_1119400   | ubiquitin-protein ligase, putative                                              | -1.16 | 53.31   | 21.52   |
| PF3D7_1119500   | AP-4 complex subunit mu, putative                                               | -0.71 | 30.38   | 16.72   |
| PF3D7_1119600   | ATP-dependent zinc metalloprotease FTSH, putative                               | 0.09  | 34.48   | 33.03   |
| PF3D7_1119700   | conserved Plasmodium protein, unknown function                                  | -1.27 | 16.20   | 6.05    |
| PF3D7_1119800   | alternative splicing factor ASF-1, putative (ASF1)                              | -0.59 | 57.06   | 34.30   |
| PF3D7_1119900   | conserved Plasmodium protein, unknown function                                  | -1.30 | 74.54   | 27.38   |
| PF3D7_1120000   | conserved Plasmodium protein, unknown function                                  | -0.76 | 163.18  | 86.92   |
| PF3D7_1120100   | phosphoglycerate mutase, putative (PGM1)                                        | -0.27 | 1709.13 | 1281.64 |
| PF3D7_1120200   | conserved Plasmodium protein, unknown function                                  | -0.62 | 48.62   | 28.51   |
| PF3D7_1120300   | magnesium transporter, putative                                                 | -0.43 | 11.23   | 7.52    |
| PF3D7_1120400   | alpha/beta hydrolase fold domain containing protein, putative                   | -0.80 | 111.24  | 57.59   |
| PF3D7_1120500   | tRNA nucleotidyltransferase, putative                                           | -0.90 | 71.75   | 34.70   |
| PF3D7_1120600   | conserved Plasmodium protein, unknown function                                  | 1.04  | 2.21    | 4.09    |
| PF3D7_1120700   | conserved Plasmodium protein, unknown function                                  | 0.43  | 2.65    | 3.23    |
| PF3D7_1120800   | conserved Plasmodium protein, unknown function                                  | 1.01  | 11.56   | 21.02   |
| PF3D7_1120900   | heat shock factor-binding protein 1 (HSBP)                                      | 0.43  | 18.40   | 22.42   |
| PF3D7_1121000   | palmitoyltransferase, putative (DHH3)                                           | 0.27  | 8.25    | 8.98    |
| PF3D7_1121100   | conserved Plasmodium protein, unknown function                                  | -0.74 | 79.22   | 42.70   |
| PF3D7_1121200   | conserved Plasmodium protein, unknown function                                  | 0.86  | 3.11    | 5.12    |
| PF3D7_1121300   | tyrosine kinase-like protein (TKL2)                                             | -0.55 | 11.75   | 7.21    |
| PF3D7_1121400   | WD repeat-containing protein, putative                                          | 0.84  | 1.26    | 2.04    |
| PF3D7_1121500   | conserved Plasmodium protein, unknown function                                  | 0.37  | 2.65    | 3.08    |
| PF3D7_1121600   | exported protein 1 (EXP1)                                                       | 0.66  | 1047.15 | 1490.88 |
| PF3D7_1121700   | protein GCN20 (GCN20)                                                           | -0.81 | 106.12  | 54.73   |
| PF3D7_1121800   | petidase, M16 family                                                            | 1.76  | 0.51    | 1.56    |
| PF3D7_1121900   | serine/threonine protein kinase, putative                                       | -0.36 | 6.20    | 4.36    |
| PF3D7_1122000   | conserved Plasmodium protein, unknown function                                  | -0.95 | 1.97    | 0.91    |
| PF3D7_1122100   | GPI transamidase component GPI16, putative (GPI16)                              | -0.56 | 6.02    | 3.67    |
| PF3D7_1122200   | cupin-like protein, putative                                                    | -0.48 | 72.81   | 46.94   |
| PF3D7_1122300   | conserved Plasmodium protein, unknown function                                  | -1.84 | 50.04   | 12.55   |
| PF3D7_1122400   | conserved Plasmodium protein, unknown function                                  | -0.22 | 27.25   | 21.11   |
| PF3D7_1122500   | conserved Plasmodium protein, unknown function                                  | -0.85 | 5.78    | 2.90    |
| PF3D7_1122600   | conserved Plasmodium protein, unknown function                                  | 0.36  | 1.78    | 2.06    |
| PF3D7_1122700   | conserved Plasmodium protein, unknown function                                  | -0.59 | 18.36   | 10.96   |
| PF3D7_1122800   | calcium-dependent protein kinase 6 (CDPK6)                                      | -0.41 | 43.21   | 29.30   |
| PF3D7_1122900   | dynein heavy chain, putative                                                    | 1.87  | 0.17    | 0.56    |
| PF3D7_1123000   | conserved Plasmodium protein, unknown function                                  | -0.61 | 83.58   | 49.37   |
| PF3D7_1123100   | calcium-dependent protein kinase 7 (CDPK7)                                      | 0.05  | 121.75  | 113.48  |
| PF3D7_1123200   | leucine-rich repeat protein (LRR11)                                             | -0.47 | 14.75   | 9.58    |
| PF3D7_1123300   | RING zinc finger protein, putative                                              | -0.68 | 43.97   | 24.79   |
| PF3D7_1123400   | translation elongation factor EF-1, subunit alpha, putative                     | -0.02 | 301.64  | 268.20  |
| PF3D7_1123500   | conserved Plasmodium protein, unknown function                                  | -1.92 | 166.30  | 39.52   |
| PF3D7_1123600   | RAP protein, putative                                                           | 0.16  | 31.70   | 31.97   |
| PF3D7_1123700   | mitochondrial ribosomal protein L37, putative                                   | 1.43  | 6.33    | 15.51   |
| PF3D7_1123800   | conserved Plasmodium protein, unknown function                                  | -0.15 | 7.11    | 5.77    |
| PF3D7_1123900   | splicing factor, putative                                                       | 0.05  | 306.44  | 285.35  |
| PF3D7_1124000   | endoplasmic reticulum oxidoreductin, putative (ERO1)                            | -0.87 | 56.27   | 27.71   |
| PF3D7_1124100   | neutral-sphingomyelinase activation factor protein, putative                    | -0.82 | 66.45   | 34.03   |
| PF3D7_1124200   | conserved Plasmodium protein, unknown function                                  | 0.26  | 20.75   | 22.43   |
| PF3D7_1124300   | conserved Plasmodium protein, unknown function                                  | -0.06 | 102.66  | 88.98   |
| PF3D7_1124400   | U6 snRNA-associated Sm-like protein LSM1, putative (LSM1)                       | -1.01 | 53.43   | 23.96   |
| PF3D7_1124500   | pyruvate dehydrogenase E1 component subunit alpha (pdhA)                        | 0.51  | 10.91   | 14.07   |
| PF3D7_1124600   | ethanolamine kinase (EK)                                                        | 0.07  | 96.62   | 91.78   |
| PF3D7_1124700   | GrpE protein homolog, mitochondrial, putative (MGE1)                            | -0.44 | 39.41   | 26.13   |
| PF3D7_1124800   | nuclear preribosomal assembly protein, putative                                 | -0.03 | 170.19  | 150.18  |
| PF3D7_1124900   | 60S ribosomal protein L35, putative                                             | 0.16  | 274.77  | 277.04  |
| PF3D7_1125000   | conserved Plasmodium protein, unknown function                                  | 0.69  | 17.52   | 25.51   |
| PF3D7_1125100   | vacuolar membrane protein-related, putative                                     | 0.39  | 7.72    | 9.14    |
| PF3D7_1125200   | conserved Plasmodium protein, unknown function                                  | -0.70 | 28.30   | 15.71   |
| PF3D7_1125300   | DNA-directed RNA polymerase (mtRNAP)                                            | -0.05 | 12.20   | 10.65   |
| PF3D7_1125400   | mitochondrial import inner membrane translocase subunit TIM44, putative (TIM44) | -0.05 | 53.61   | 46.71   |
| PF3D7_1125500   | small nuclear ribonucleoprotein Sm D1, putative (SNRPD1)                        | -0.62 | 208.53  | 122.40  |
| PF3D7_1125600   | conserved Plasmodium protein, unknown function                                  | 1.14  | 10.58   | 21.11   |
| PF3D7_1125700   | kelch protein, putative                                                         | 1.22  | 20.57   | 43.23   |
| PF3D7_1125800   | kelch protein, putative                                                         | 1.38  | 26.66   | 62.45   |
| PF3D7_1125900   | conserved Plasmodium protein, unknown function                                  | -0.42 | 84.28   | 56.92   |
| PF3D7_1126000   | threonine--tRNA ligase (ThrRS)                                                  | -0.39 | 202.93  | 139.70  |
| PF3D7_1126100   | autophagy-related protein 7, putative (ATG7)                                    | -0.42 | 4.17    | 2.82    |
| PF3D7_1126200   | 40S ribosomal protein S18, putative                                             | 0.37  | 899.36  | 1047.40 |
| PF3D7_1126300   | DnaJ protein, putative                                                          | -1.23 | 38.76   | 14.87   |
| PF3D7_1126400   | large ribosomal subunit processing factor, putative                             | -1.85 | 46.07   | 11.47   |
| PF3D7_1126500   | conserved Plasmodium protein, unknown function                                  | -1.26 | 81.26   | 30.57   |

|                 |                                                             |       |         |         |
|-----------------|-------------------------------------------------------------|-------|---------|---------|
| PF3D7_1126600   | steryl ester hydrolase, putative                            | 0.45  | 11.15   | 13.75   |
| PF3D7_1126700   | autophagy-related protein 23, putative (ATG23)              | 1.12  | 61.09   | 119.71  |
| PF3D7_1126800   | RNA-binding protein, putative                               | 0.24  | 2.72    | 2.89    |
| PF3D7_1126900   | small nuclear ribonucleoprotein F, putative (SNRPF)         | 0.26  | 51.15   | 55.24   |
| PF3D7_1127000   | protein phosphatase, putative                               | -0.93 | 46.02   | 21.83   |
| PF3D7_1127100   | deoxyuridine 5'-triphosphate nucleotidohydrolase (dUTPase)  | 1.00  | 31.93   | 57.80   |
| PF3D7_1127200   | conserved Plasmodium protein, unknown function              | 1.19  | 0.11    | 0.33    |
| PF3D7_1127300   | methyltransferase, putative                                 | -1.38 | 43.61   | 15.14   |
| PF3D7_1127400   | conserved Plasmodium protein, unknown function              | -0.78 | 9.80    | 5.13    |
| PF3D7_1127500   | protein disulfide isomerase, putative                       | 0.69  | 14.60   | 21.24   |
| PF3D7_1127600   | CRAL/TRIO domain-containing protein, putative               | 0.60  | 39.59   | 54.07   |
| PF3D7_1127700   | conserved Plasmodium protein, unknown function              | -1.08 | 1.15    | 0.48    |
| PF3D7_1127800   | conserved Plasmodium protein, unknown function              | -0.15 | 17.11   | 13.87   |
| PF3D7_1127900   | conserved Plasmodium protein, unknown function              | 0.79  | 26.62   | 41.42   |
| PF3D7_1128000.1 | conserved Plasmodium protein, unknown function              | -0.92 | 104.65  | 49.93   |
| PF3D7_1128000.2 | conserved Plasmodium protein, unknown function              | -0.92 | 103.47  | 49.47   |
| PF3D7_1128100   | cochaperone prefoldin complex subunit, putative             | 0.24  | 83.93   | 89.50   |
| PF3D7_1128200   | multi-protein bridging factor type 1, putative (MBF1)       | 0.44  | 99.46   | 121.37  |
| PF3D7_1128300   | 6-phosphofructokinase (PFK11)                               | 1.06  | 0.84    | 1.57    |
| PF3D7_1128400   | geranylgeranyl pyrophosphate synthase, putative (GGPPS)     | 0.21  | 36.12   | 37.63   |
| PF3D7_1128500   | conserved protein, unknown function                         | -0.99 | 27.95   | 12.69   |
| PF3D7_1128600   | CCR4-NOT transcription complex subunit 2, putative (NOT2)   | 2.39  | 1.33    | 6.35    |
| PF3D7_1128700   | GPI-anchor transamidase (GPI8)                              | -0.94 | 9.99    | 4.68    |
| PF3D7_1128900   | conserved Plasmodium protein, unknown function              | -0.20 | 43.65   | 34.21   |
| PF3D7_1129000   | spermidine synthase (SpdSyn)                                | -0.30 | 132.75  | 97.48   |
| PF3D7_1129100   | parasitophorous vacuolar protein 1 (PV1)                    | 0.20  | 745.90  | 771.57  |
| PF3D7_1129200   | 26S proteasome regulatory subunit RPN7, putative (RPN7)     | 0.06  | 156.76  | 147.12  |
| PF3D7_1129300   | conserved Plasmodium protein, unknown function              | 0.05  | 11.89   | 11.13   |
| PF3D7_1129400   | RNA methyltransferase, putative                             | -0.32 | 104.92  | 75.82   |
| PF3D7_1129500   | A/G-specific adenine glycosylase, putative                  | 0.50  | 7.31    | 9.31    |
| PF3D7_1129600   | phosphatidylinositol-4-phosphate 5-kinase, putative         | 1.33  | 2.01    | 4.59    |
| PF3D7_1129700   | conserved Plasmodium protein, unknown function              | -2.04 | 16.79   | 3.65    |
| PF3D7_1129800   | conserved Plasmodium protein, unknown function              | -0.59 | 12.24   | 7.32    |
| PF3D7_1129900   | transporter, putative                                       | -0.76 | 42.77   | 22.80   |
| PF3D7_1130000   | phosphoacetylglucosamine mutase, putative (PAGM)            | -0.56 | 18.67   | 11.46   |
| PF3D7_1130100   | 60S ribosomal protein L38 (RPL38)                           | -0.51 | 677.17  | 428.50  |
| PF3D7_1130200   | 60S ribosomal protein P0 (PfP0)                             | 0.02  | 1947.66 | 1781.01 |
| PF3D7_1130300   | small nucleolar RNA snoR13                                  | -2.87 | 42.78   | 5.07    |
| PF3D7_1130310   | small nucleolar RNA snoR14a                                 | -2.98 | 7.61    | 0.67    |
| PF3D7_1130400   | 26S protease regulatory subunit 6A, putative (RPT5)         | 0.16  | 173.95  | 175.50  |
| PF3D7_1130500   | conserved Plasmodium protein, unknown function              | 0.05  | 8.50    | 7.96    |
| PF3D7_1130600   | conserved Plasmodium protein, unknown function              | -0.43 | 30.61   | 20.52   |
| PF3D7_1130700   | structural maintenance of chromosome protein, putative      | 0.74  | 10.04   | 15.16   |
| PF3D7_1130800   | armadillo repeat protein PF16, putative                     | 0.62  | 1.63    | 2.27    |
| PF3D7_1130900   | conserved Plasmodium protein, unknown function              | 0.52  | 0.83    | 1.07    |
| PF3D7_1131000   | RNA-binding protein s1, putative                            | 1.01  | 8.03    | 14.68   |
| PF3D7_1131100   | serpentine receptor, putative (SR1)                         | -0.49 | 18.47   | 11.89   |
| PF3D7_1131200   | conserved Plasmodium protein, unknown function              | 0.29  | 7.56    | 8.36    |
| PF3D7_1131300   | conserved Plasmodium protein, unknown function              | 0.87  | 0.62    | 1.03    |
| PF3D7_1131400   | conserved Plasmodium protein, unknown function              | 0.37  | 0.75    | 0.88    |
| PF3D7_1131500   | conserved Plasmodium protein, unknown function              | 1.44  | 2.24    | 5.53    |
| PF3D7_1131600   | conserved Plasmodium protein, unknown function              | 0.83  | 0.36    | 0.58    |
| PF3D7_1131700   | conserved Plasmodium protein, unknown function              | 0.48  | 1.42    | 1.79    |
| PF3D7_1131800   | oxysterol-binding protein-related protein 2                 | 0.73  | 16.26   | 24.34   |
| PF3D7_1131900   | conserved Plasmodium protein, unknown function              | 1.49  | 0.48    | 1.23    |
| PF3D7_1132000   | ubiquitin-like protein, putative                            | -0.48 | 59.42   | 38.48   |
| PF3D7_1132100   | conserved Plasmodium protein, unknown function              | 0.20  | 0.57    | 0.59    |
| PF3D7_1132200   | T-complex protein 1 subunit alpha (TCP1)                    | 0.41  | 290.18  | 346.93  |
| PF3D7_1132300   | nucleic acid binding protein, putative                      | -0.23 | 41.23   | 31.80   |
| PF3D7_1132400   | conserved Plasmodium membrane protein, unknown function     | -0.15 | 15.14   | 12.30   |
| PF3D7_1132500   | amino acid transporter, putative                            | 1.04  | 0.26    | 0.49    |
| PF3D7_1132600   | pre-mRNA-splicing factor 38A, putative (PRP38A)             | -0.64 | 73.72   | 42.65   |
| PF3D7_1132700   | mitochondrial ribosomal protein L2 precursor                | 0.27  | 19.38   | 21.10   |
| PF3D7_1132800   | aquaglyceroporin (AQP)                                      | -0.24 | 121.17  | 92.80   |
| PF3D7_1132900   | glycine cleavage system H protein (GCVH)                    | 0.57  | 6.28    | 8.44    |
| PF3D7_1133000   | conserved Plasmodium protein, unknown function              | -0.20 | 33.85   | 26.61   |
| PF3D7_1133100   | conserved membrane protein, unknown function                | 0.03  | 105.80  | 97.71   |
| PF3D7_1133200   | conserved Plasmodium protein, unknown function              | 1.00  | 32.19   | 58.20   |
| PF3D7_1133300   | LEM3/CDC50 family protein, putative                         | -0.53 | 19.29   | 12.05   |
| PF3D7_1133400   | apical membrane antigen 1 (AMA1)                            | 2.46  | 34.71   | 171.93  |
| PF3D7_1133500   | conserved Plasmodium protein, unknown function              | 0.44  | 1.56    | 1.91    |
| PF3D7_1133600   | conserved Plasmodium protein, unknown function              | -0.98 | 4.17    | 1.91    |
| PF3D7_1133700   | conserved Plasmodium protein, unknown function              | -0.21 | 997.10  | 780.41  |
| PF3D7_1133800   | RNA (uracil-5-)-methyltransferase, putative                 | -0.26 | 51.20   | 38.60   |
| PF3D7_1133900   | conserved Plasmodium protein, unknown function              | -0.71 | 74.04   | 40.93   |
| PF3D7_1134000   | heat shock protein 70 (HSP70-3)                             | 0.51  | 220.01  | 283.19  |
| PF3D7_1134100   | protein disulfide isomerase (PDI-11)                        | -0.13 | 56.60   | 46.80   |
| PF3D7_1134200   | conserved Plasmodium protein, unknown function              | -1.36 | 43.58   | 15.32   |
| PF3D7_1134300   | conserved Plasmodium protein, unknown function              | 0.13  | 14.55   | 14.37   |
| PF3D7_1134400   | conserved Plasmodium protein, unknown function              | 1.45  | 5.03    | 12.46   |
| PF3D7_1134500   | alpha/beta hydrolase, putative                              | -1.82 | 31.17   | 7.95    |
| PF3D7_1134600   | zinc finger protein, putative                               | 0.98  | 4.36    | 7.78    |
| PF3D7_1134700   | DNA-directed RNA polymerase I subunit RPA2, putative (RPA2) | -0.56 | 117.33  | 71.75   |
| PF3D7_1134800   | coatomer subunit delta                                      | -0.97 | 99.91   | 46.00   |
| PF3D7_1134900   | conserved Plasmodium protein, unknown function              | -0.14 | 1.99    | 1.63    |
| PF3D7_1135000.1 | conserved Plasmodium protein, unknown function              | 0.06  | 3.25    | 3.05    |
| PF3D7_1135000.2 | conserved Plasmodium protein, unknown function              | -0.35 | 3.51    | 2.46    |
| PF3D7_1135000.3 | conserved Plasmodium protein, unknown function              | -0.17 | 3.44    | 2.74    |
| PF3D7_1135100   | protein phosphatase PPM8, putative (PPM8)                   | -0.91 | 121.24  | 58.34   |
| PF3D7_1135200   | regulator of chromosome condensation, putative, pseudogene  | -1.04 | 1.46    | 0.63    |
| PF3D7_1135300   | conserved Plasmodium membrane protein, unknown function     | -1.25 | 13.80   | 5.22    |
| PF3D7_1135400   | conserved Plasmodium protein, unknown function              | -1.28 | 121.47  | 45.16   |
| PF3D7_1135500   | conserved Plasmodium protein, unknown function              | 0.24  | 1.66    | 1.77    |
| PF3D7_1135600   | conserved Plasmodium protein, unknown function              | 0.70  | 1.32    | 1.95    |
| PF3D7_1135700   | conserved Plasmodium protein, unknown function              | -0.14 | 47.89   | 39.10   |
| PF3D7_1135800   | conserved Plasmodium protein, unknown function              | -1.25 | 25.06   | 9.50    |
| PF3D7_1135900   | 3-oxo-5-alpha-steroid 4-dehydrogenase, putative             | -0.41 | 119.11  | 80.93   |
| PF3D7_1136000   | conserved Plasmodium protein, unknown function              | -0.21 | 7.13    | 5.54    |



|                 |                                                                                 |       |        |        |
|-----------------|---------------------------------------------------------------------------------|-------|--------|--------|
| PF3D7_1136100   | conserved Plasmodium protein, unknown function                                  | -0.07 | 0.52   | 0.45   |
| PF3D7_1136200   | conserved Plasmodium protein, unknown function                                  | -0.11 | 38.73  | 32.43  |
| PF3D7_1136300   | tudor staphylococcal nuclease (TSN)                                             | -0.64 | 181.44 | 105.06 |
| PF3D7_1136400   | signal recognition particle subunit SRP72, putative (SRP72)                     | -1.28 | 83.17  | 30.92  |
| PF3D7_1136500.1 | casein kinase 1 (CK1)                                                           | 0.41  | 441.77 | 530.43 |
| PF3D7_1136500.2 | casein kinase 1 (CK1)                                                           | 0.39  | 437.70 | 516.49 |
| PF3D7_1136600   | conserved Plasmodium protein, unknown function                                  | -0.59 | 139.70 | 83.46  |
| PF3D7_1136700.1 | conserved Plasmodium protein, unknown function                                  | 0.35  | 17.71  | 20.39  |
| PF3D7_1136700.2 | conserved Plasmodium protein, unknown function                                  | 0.33  | 17.38  | 19.69  |
| PF3D7_1136800   | DnaJ protein, putative                                                          | -1.17 | 74.89  | 30.02  |
| PF3D7_1136900   | subtilisin-like protease 2 (SUB2)                                               | 1.88  | 11.06  | 36.79  |
| PF3D7_1137000   | U2 spliceosomal RNA                                                             | 3.51  | 11.09  | 115.15 |
| PF3D7_1137100   | mitochondrial ribosomal protein S9 precursor, putative                          | 0.52  | 52.56  | 67.97  |
| PF3D7_1137200   | conserved Plasmodium protein, unknown function                                  | -0.28 | 13.12  | 9.74   |
| PF3D7_1137300   | conserved Plasmodium membrane protein, unknown function                         | -0.60 | 119.41 | 70.97  |
| PF3D7_1137400   | UVB-resistance protein UVR8 homologue                                           | 0.64  | 13.67  | 19.26  |
| PF3D7_1137500   | apicoplast ribosomal protein S14p/S29e precursor, putative                      | 0.30  | 29.95  | 33.24  |
| PF3D7_1137600   | conserved Plasmodium protein, unknown function                                  | 1.47  | 0.23   | 0.58   |
| PF3D7_1137700   | calcium-binding protein, putative                                               | 0.74  | 0.47   | 0.71   |
| PF3D7_1137800   | conserved Plasmodium protein, unknown function                                  | 1.24  | 6.93   | 14.80  |
| PF3D7_1137900   | conserved Plasmodium protein, unknown function                                  | 1.38  | 0.13   | 0.31   |
| PF3D7_1138000   | conserved Plasmodium protein, unknown function                                  | -0.96 | 14.01  | 6.51   |
| PF3D7_1138100   | ubiquitin-related modifier 1, putative (URM1)                                   | -1.41 | 36.33  | 12.33  |
| PF3D7_1138200   | conserved Plasmodium membrane protein, unknown function                         | 0.78  | 6.47   | 10.02  |
| PF3D7_1138300   | conserved Plasmodium membrane protein, unknown function                         | 0.43  | 3.55   | 4.34   |
| PF3D7_1138400   | guanylyl cyclase (GCalpha)                                                      | -0.13 | 9.76   | 8.04   |
| PF3D7_1138500   | protein phosphatase 2C (PPM2)                                                   | -0.73 | 293.27 | 160.07 |
| PF3D7_1138600   | beta-catenin-like protein 1, putative                                           | -0.67 | 30.86  | 17.48  |
| PF3D7_1138700   | conserved Plasmodium protein, unknown function                                  | -0.72 | 47.26  | 25.81  |
| PF3D7_1138800   | WD repeat-containing protein, putative                                          | -0.82 | 75.49  | 38.69  |
| PF3D7_1138900   | unspecified product                                                             | -2.34 | 0.53   | 0.09   |
| PF3D7_1139000   | unspecified product                                                             | -1.82 | 9.87   | 2.51   |
| PF3D7_1139100   | RNA-binding protein, putative                                                   | -0.77 | 98.14  | 51.99  |
| PF3D7_1139200   | conserved Plasmodium protein, unknown function                                  | -0.83 | 15.22  | 7.70   |
| PF3D7_1139300   | transcription factor with AP2 domain(s) (ApiAP2)                                | -1.41 | 113.49 | 38.56  |
| PF3D7_1139400   | unspecified product                                                             | -4.15 | 1.13   | 0.05   |
| PF3D7_1139500.1 | AAA family ATPase, putative                                                     | 1.77  | 0.09   | 0.31   |
| PF3D7_1139500.2 | AAA family ATPase, putative                                                     | 0.87  | 0.07   | 0.13   |
| PF3D7_1139600   | conserved Plasmodium protein, unknown function                                  | -0.34 | 1.11   | 0.79   |
| PF3D7_1139700   | adrenodoxin reductase, putative                                                 | -0.30 | 6.51   | 4.75   |
| PF3D7_1139800   | conserved Plasmodium protein, unknown function                                  | -1.35 | 14.50  | 5.14   |
| PF3D7_1139900   | conserved protein, unknown function                                             | -1.54 | 53.73  | 16.67  |
| PF3D7_1140000   | carbonic anhydrase (CA)                                                         | 1.11  | 2.11   | 4.13   |
| PF3D7_1140100   | V-type proton ATPase subunit F, putative                                        | -0.67 | 73.22  | 41.60  |
| PF3D7_1140200   | conserved Plasmodium protein, unknown function                                  | 1.80  | 29.13  | 91.50  |
| PF3D7_1140300   | P-loop containing nucleoside triphosphate hydrolase, putative                   | -0.36 | 1.49   | 1.04   |
| PF3D7_1140400   | conserved Plasmodium protein, unknown function                                  | 0.44  | 111.47 | 136.40 |
| PF3D7_1140500   | myosin F, putative (MyoF)                                                       | 1.05  | 1.41   | 2.64   |
| PF3D7_1140600   | conserved Plasmodium protein, unknown function                                  | -0.71 | 6.92   | 3.81   |
| PF3D7_1140700   | conserved Plasmodium protein, unknown function                                  | -0.50 | 75.73  | 48.40  |
| PF3D7_1140800   | conserved Plasmodium protein, unknown function                                  | -0.88 | 61.01  | 29.88  |
| PF3D7_1140900   | conserved Plasmodium protein, unknown function                                  | -0.16 | 1.98   | 1.60   |
| PF3D7_1141000   | conserved Plasmodium protein, unknown function                                  | 0.64  | 0.39   | 0.55   |
| PF3D7_1141100   | conserved Plasmodium protein, unknown function                                  | -0.61 | 1.56   | 0.92   |
| PF3D7_1141200   | conserved Plasmodium protein, unknown function                                  | 1.58  | 4.07   | 11.10  |
| PF3D7_1141300   | conserved Plasmodium protein, unknown function                                  | 0.42  | 15.55  | 18.81  |
| PF3D7_1141400   | phosphatidylinositol N-acetylglucosaminyltransferase subunit H, putative (PIGH) | -0.10 | 14.83  | 12.51  |
| PF3D7_1141500   | conserved Plasmodium protein, unknown function                                  | 1.77  | 0.22   | 0.73   |
| PF3D7_1141600   | dolichol-phosphate mannosyltransferase (DPM1)                                   | 0.29  | 6.81   | 7.53   |
| PF3D7_1141700   | conserved Plasmodium protein, unknown function                                  | -0.33 | 17.38  | 12.47  |
| PF3D7_1141800   | phd finger protein, putative                                                    | -0.66 | 27.64  | 15.82  |
| PF3D7_1141900   | inner membrane complex protein 1b, putative (IMC1b)                             | 1.15  | 0.30   | 0.61   |
| PF3D7_1142000   | conserved Plasmodium protein, unknown function                                  | 0.73  | 0.70   | 1.05   |
| PF3D7_1142100   | conserved Plasmodium protein, unknown function                                  | -0.49 | 125.47 | 80.69  |
| PF3D7_1142200   | conserved Plasmodium protein, unknown function                                  | -1.10 | 1.78   | 0.73   |
| PF3D7_1142300   | conserved Plasmodium membrane protein, unknown function                         | 0.41  | 18.84  | 22.61  |
| PF3D7_1142400   | coproporphyrinogen-III oxidase (CPO)                                            | -1.02 | 102.69 | 45.73  |
| PF3D7_1142500   | 60S ribosomal protein L28 (RPL28)                                               | 0.03  | 232.11 | 214.23 |
| PF3D7_1142600   | 60S ribosomal protein L35ae, putative                                           | 0.23  | 931.68 | 987.52 |
| PF3D7_1142700   | methyltransferase, putative                                                     | -1.41 | 76.56  | 25.91  |
| PF3D7_1142800   | conserved Plasmodium protein, unknown function                                  | -0.66 | 11.45  | 6.54   |
| PF3D7_1142900   | conserved Plasmodium protein, unknown function                                  | -0.40 | 3.75   | 2.55   |
| PF3D7_1143000   | alpha/beta hydrolase, putative                                                  | 0.18  | 5.07   | 5.19   |
| PF3D7_1143100   | transcription factor with AP2 domain(s) (AP2-O)                                 | 1.64  | 21.19  | 59.69  |
| PF3D7_1143200   | DnaJ protein, putative                                                          | -0.53 | 32.21  | 20.17  |
| PF3D7_1143300   | DNA-directed RNA polymerase I, putative                                         | -0.06 | 128.81 | 111.36 |
| PF3D7_1143400   | translation initiation factor eIF-1A, putative                                  | 0.52  | 251.66 | 324.64 |
| PF3D7_1143500   | conserved Plasmodium protein, unknown function                                  | -0.28 | 4.20   | 3.11   |
| PF3D7_1143600   | conserved Plasmodium protein, unknown function                                  | 0.93  | 1.90   | 3.30   |
| PF3D7_1143700   | conserved Plasmodium protein, unknown function                                  | 0.78  | 1.34   | 2.08   |
| PF3D7_1143800   | conserved Plasmodium protein, unknown function                                  | -0.97 | 105.50 | 48.67  |
| PF3D7_1143900   | carbohydrate kinase, putative                                                   | -0.77 | 12.80  | 6.78   |
| PF3D7_1144000   | 40S ribosomal protein S21 (RPS21)                                               | 0.70  | 404.63 | 594.62 |
| PF3D7_1144100   | mitochondrial large subunit ribosomal protein, putative                         | 0.58  | 8.13   | 10.96  |
| PF3D7_1144200   | conserved Plasmodium protein, unknown function                                  | -0.72 | 9.92   | 5.42   |
| PF3D7_1144300   | 60S ribosomal protein L41 (RPL41)                                               | -0.33 | 106.03 | 75.81  |
| PF3D7_1144400   | conserved Plasmodium protein, unknown function                                  | 0.16  | 2.10   | 2.11   |
| PF3D7_1144500   | ubiquitin activating enzyme (E1) subunit Aos1, putative (AOS1)                  | -0.11 | 21.92  | 18.34  |
| PF3D7_1144600   | transcription initiation factor IIIF subunit beta, putative (TFG2)              | -0.32 | 78.47  | 56.51  |
| PF3D7_1144700   | apicoplast import protein Tic20, putative (TIC20)                               | 0.55  | 11.23  | 14.88  |
| PF3D7_1144800   | conserved Plasmodium protein, unknown function                                  | 0.02  | 3.48   | 3.19   |
| PF3D7_1144900   | ras-related protein Rab-6 (RAB6)                                                | -0.45 | 139.24 | 91.79  |
| PF3D7_1145000   | conserved Plasmodium protein, unknown function                                  | 0.76  | 5.27   | 8.05   |
| PF3D7_1145100   | coatomer subunit gamma, putative (SEC21)                                        | -1.54 | 77.69  | 24.16  |
| PF3D7_1145200   | serine/threonine protein kinase, putative                                       | 0.34  | 79.34  | 90.39  |
| PF3D7_1145300   | cysteine-rich PDZ-binding protein, putative (CRIPT)                             | 0.36  | 9.50   | 10.99  |
| PF3D7_1145400   | dynamine-like protein (DYN1)                                                    | -0.58 | 110.10 | 66.66  |
| PF3D7_1145500   | ABC transporter B family member 3, putative (ABCB3)                             | 0.22  | 2.80   | 2.95   |

|                 |                                                                 |       |         |         |
|-----------------|-----------------------------------------------------------------|-------|---------|---------|
| PF3D7_1145600   | conserved protein, unknown function                             | 0.69  | 3.63    | 5.29    |
| PF3D7_1145700   | bicoid-interacting protein BIN3, putative                       | -0.51 | 3.01    | 1.89    |
| PF3D7_1145800   | conserved Plasmodium protein, unknown function                  | -0.97 | 27.28   | 12.52   |
| PF3D7_1145900   | conserved Plasmodium protein, unknown function                  | 0.18  | 4.48    | 4.58    |
| PF3D7_1146000   | ribosome assembly protein 4, putative (RSA4)                    | 0.17  | 72.06   | 73.14   |
| PF3D7_1146100   | conserved Plasmodium protein, unknown function                  | -0.12 | 3.05    | 2.53    |
| PF3D7_1146200   | conserved Plasmodium protein, unknown function                  | -0.59 | 5.58    | 3.33    |
| PF3D7_1146300   | conserved Plasmodium protein, unknown function                  | 0.83  | 0.52    | 0.85    |
| PF3D7_1146500   | leucine-rich repeat protein (LRR10)                             | 1.64  | 0.23    | 0.70    |
| PF3D7_1146600   | CCAAT-box DNA binding protein subunit B (NFYB)                  | 0.05  | 36.25   | 33.77   |
| PF3D7_1146700   | kinesin-like protein, putative                                  | 0.45  | 0.18    | 0.22    |
| PF3D7_1146800   | conserved Plasmodium protein, unknown function                  | 2.39  | 0.83    | 3.94    |
| PF3D7_1146900   | protein YIPF6, putative                                         | -0.65 | 7.43    | 4.25    |
| PF3D7_1147000   | sporozoite asparagine-rich protein (SLARP)                      | 0.70  | 0.28    | 0.41    |
| PF3D7_1147100   | dynein light chain, putative                                    | 1.19  | 0.00    | 0.07    |
| PF3D7_1147200   | tubulin-tyrosine ligase, putative                               | 1.11  | 1.33    | 2.60    |
| PF3D7_1147300   | conserved Plasmodium protein, unknown function                  | 0.33  | 20.27   | 23.05   |
| PF3D7_1147400   | conserved Plasmodium protein, unknown function                  | 0.57  | 13.11   | 17.62   |
| PF3D7_1147500   | farnesyltransferase beta subunit, putative                      | -1.31 | 9.54    | 3.47    |
| PF3D7_1147600   | conserved Plasmodium protein, unknown function                  | -1.29 | 5.72    | 2.10    |
| PF3D7_1147700   | mitochondrial ATP synthase delta subunit, putative              | 1.22  | 16.52   | 34.82   |
| PF3D7_1147800.1 | merozoite adhesive erythrocytic binding protein (MAEBL)         | 0.42  | 5.11    | 6.19    |
| PF3D7_1147800.2 | merozoite adhesive erythrocytic binding protein (MAEBL)         | 0.45  | 5.15    | 6.35    |
| PF3D7_1147900   | conserved Plasmodium protein, unknown function                  | -0.78 | 101.45  | 53.28   |
| PF3D7_1148000   | serine/threonine protein kinase, putative                       | 1.32  | 6.78    | 15.34   |
| PF3D7_1148100   | unspecified product                                             | -1.11 | 0.85    | 0.35    |
| PF3D7_1148200   | unspecified product                                             | 1.44  | 78.40   | 192.54  |
| PF3D7_1148500   | unspecified product                                             | 0.19  | 0.41    | 0.42    |
| PF3D7_1148600   | 18S ribosomal RNA                                               | 2.29  | 9.36    | 41.34   |
| PF3D7_1148700   | Plasmodium exported protein (PHISTc), unknown function (GEXP12) | -0.70 | 944.99  | 525.82  |
| PF3D7_1148800   | Plasmodium exported protein (hyp1), unknown function            | -0.69 | 138.34  | 77.47   |
| PF3D7_1148900   | Plasmodium exported protein, unknown function                   | -1.70 | 1066.31 | 295.04  |
| PF3D7_1149000   | antigen 332, DBL-like protein (Pf332)                           | 1.54  | 22.02   | 57.62   |
| PF3D7_1149100.1 | Plasmodium exported protein, unknown function                   | 0.84  | 200.16  | 322.59  |
| PF3D7_1149100.2 | Plasmodium exported protein, unknown function                   | 0.84  | 200.50  | 322.93  |
| PF3D7_1149200   | ring-infected erythrocyte surface antigen                       | 0.42  | 529.00  | 640.48  |
| PF3D7_1149300   | serine/threonine protein kinase, FIKK family (FIKK11)           | -0.90 | 11.53   | 5.58    |
| PF3D7_1149400   | Plasmodium exported protein, unknown function                   | 1.14  | 9.46    | 18.79   |
| PF3D7_1149500   | ring-infected erythrocyte surface antigen 2, pseudogene (RESA2) | -1.98 | 21.68   | 4.94    |
| PF3D7_1149600   | DnaJ protein, putative                                          | 0.10  | 159.57  | 154.21  |
| PF3D7_1149700   | Plasmodium exported protein (PHISTa), unknown function          | -0.02 | 1.22    | 1.07    |
| PF3D7_1149800   | rifin (RIF)                                                     | -0.11 | 1.49    | 1.24    |
| PF3D7_1149900   | stevor                                                          | 0.58  | 0.29    | 0.40    |
| PF3D7_1150000   | rifin (RIF)                                                     | 0.19  | 0.00    | 0.00    |
| PF3D7_1150100   | rifin, pseudogene (RIF)                                         | -1.40 | 0.05    | 0.00    |
| PF3D7_1150200   | rifin (RIF)                                                     | -0.55 | 0.09    | 0.05    |
| PF3D7_1150300   | rifin (RIF)                                                     | 0.55  | 0.13    | 0.18    |
| PF3D7_1150400   | erythrocyte membrane protein 1, PfEMP1 (VAR)                    | -0.89 | 0.84    | 0.41    |
| PF3D7_1200100   | erythrocyte membrane protein 1, PfEMP1 (VAR)                    | 1.36  | 12.15   | 28.22   |
| PF3D7_1200200   | rifin (RIF)                                                     | 0.49  | 5.48    | 6.93    |
| PF3D7_1200300   | rifin (RIF)                                                     | 0.36  | 0.50    | 0.58    |
| PF3D7_1200400   | erythrocyte membrane protein 1, PfEMP1 (VAR)                    | -0.40 | 1.37    | 0.94    |
| PF3D7_1200500   | rifin (RIF)                                                     | 1.12  | 3.41    | 6.72    |
| PF3D7_1200600   | erythrocyte membrane protein 1, PfEMP1 (VAR2CSA)                | 0.95  | 29.78   | 51.76   |
| PF3D7_1200700   | acyl-CoA synthetase (ACS7)                                      | -0.36 | 1610.44 | 1129.83 |
| PF3D7_1200800   | serine/threonine protein kinase, FIKK family (FIKK12)           | -0.92 | 100.81  | 47.91   |
| PF3D7_1200900   | Plasmodium exported protein (PHISTc), unknown function          | -1.42 | 124.25  | 41.92   |
| PF3D7_1201000   | Plasmodium exported protein (PHISTb), unknown function          | 1.30  | 40.81   | 90.84   |
| PF3D7_1201100   | RESA-like protein with PHIST and DnaJ domains                   | 0.44  | 6.98    | 8.56    |
| PF3D7_1201200   | Plasmodium exported protein (PHISTa-like), unknown function     | -0.21 | 571.29  | 445.18  |
| PF3D7_1201300   | liver stage associated protein 1 (LSAP1)                        | 0.59  | 1.67    | 2.30    |
| PF3D7_1201400   | Plasmodium exported protein, unknown function                   | -0.09 | 6.85    | 5.79    |
| PF3D7_1201500   | XPA binding protein 1, putative                                 | -0.45 | 110.86  | 73.08   |
| PF3D7_1201600   | NIMA related kinase 3 (NEK3)                                    | -0.57 | 5.34    | 3.24    |
| PF3D7_1201700   | conserved Plasmodium membrane protein, unknown function         | -0.50 | 0.84    | 0.53    |
| PF3D7_1201800   | cytochrome c oxidase assembly protein COX19, putative (COX19)   | -0.98 | 7.02    | 3.19    |
| PF3D7_1201900   | conserved protein, unknown function                             | -0.08 | 47.46   | 40.49   |
| PF3D7_1202000   | ATP-dependent RNA helicase, putative                            | -1.32 | 15.50   | 5.60    |
| PF3D7_1202100.1 | conserved protein, unknown function                             | 1.25  | 33.97   | 73.08   |
| PF3D7_1202100.2 | conserved protein, unknown function                             | 1.26  | 33.93   | 73.19   |
| PF3D7_1202200   | mitochondrial phosphate carrier protein (MPC)                   | 0.76  | 31.27   | 47.67   |
| PF3D7_1202300   | dynein heavy chain, putative                                    | 0.65  | 1.03    | 1.46    |
| PF3D7_1202400   | peptidyl-prolyl cis-trans isomerase (CYP26)                     | 0.99  | 11.91   | 21.34   |
| PF3D7_1202500   | trimethylguanosine synthase, putative                           | -0.70 | 12.72   | 7.05    |
| PF3D7_1202600   | conserved protein, unknown function                             | 0.31  | 191.17  | 213.33  |
| PF3D7_1202700   | conserved Plasmodium protein, unknown function                  | -0.69 | 61.12   | 34.09   |
| PF3D7_1202800   | conserved Plasmodium protein, unknown function                  | -0.17 | 19.47   | 15.59   |
| PF3D7_1202900   | high mobility group protein B1 (HMGB1)                          | -0.24 | 1064.82 | 813.49  |
| PF3D7_1203000   | origin recognition complex subunit 1 (ORC1)                     | 0.92  | 14.76   | 25.28   |
| PF3D7_1203100   | conserved Plasmodium protein, unknown function                  | -1.24 | 29.78   | 11.31   |
| PF3D7_1203200   | signal recognition particle subunit SRP14 (SRP14)               | 0.29  | 52.62   | 58.20   |
| PF3D7_1203300   | conserved Plasmodium protein, unknown function                  | 0.55  | 4.44    | 5.85    |
| PF3D7_1203400   | transporter, putative                                           | 0.20  | 10.89   | 11.32   |
| PF3D7_1203500   | threonylcarbamoyl-AMP synthase, putative (SUA5)                 | -0.69 | 121.77  | 68.29   |
| PF3D7_1203600   | cytochrome c1 heme lyase, putative                              | 0.71  | 8.03    | 11.87   |
| PF3D7_1203700   | nucleosome assembly protein (NAPL)                              | 0.37  | 1070.25 | 1251.21 |
| PF3D7_1203800   | unspecified product                                             | -2.51 | 0.19    | 0.02    |
| PF3D7_1203900   | ubiquitin-conjugating enzyme E2 (UBC)                           | -0.14 | 210.12  | 171.58  |
| PF3D7_1204000   | conserved Plasmodium protein, unknown function                  | 2.27  | 0.36    | 1.73    |
| PF3D7_1204100   | conserved Plasmodium protein, unknown function                  | 1.08  | 2.38    | 4.54    |
| PF3D7_1204200   | conserved Plasmodium protein, unknown function                  | -0.58 | 7.13    | 4.31    |
| PF3D7_1204300   | eukaryotic translation initiation factor 5A (EIF5A)             | 0.25  | 892.07  | 957.41  |
| PF3D7_1204400   | conserved Plasmodium membrane protein, unknown function         | 0.36  | 0.66    | 0.77    |
| PF3D7_1204500   | conserved Plasmodium protein, unknown function                  | -0.02 | 17.12   | 15.19   |
| PF3D7_1204600   | cytidine deaminase, putative                                    | -0.52 | 39.91   | 25.03   |
| PF3D7_1204700   | conserved Plasmodium protein, unknown function                  | 1.18  | 8.89    | 18.27   |
| PF3D7_1204900   | probable protein, unknown function                              | 1.67  | 9.92    | 28.66   |
| PF3D7_1205000   | conserved Plasmodium protein, unknown function                  | 0.18  | 19.27   | 19.64   |

|                 |                                                                                 |       |         |         |
|-----------------|---------------------------------------------------------------------------------|-------|---------|---------|
| PF3D7_1205100   | O-phosphoserine-tRNA(Sec) selenium transferase, putative (SEPSECS)              | 0.38  | 18.92   | 22.27   |
| PF3D7_1205200   | HAD domain ookinete protein, putative (HADO)                                    | -0.82 | 3.66    | 1.86    |
| PF3D7_1205300   | conserved Plasmodium protein, unknown function                                  | 0.22  | 4.48    | 4.70    |
| PF3D7_1205400   | conserved Plasmodium protein, unknown function                                  | -1.03 | 17.70   | 7.81    |
| PF3D7_1205500   | zinc finger protein, putative                                                   | -1.00 | 167.46  | 75.79   |
| PF3D7_1205600   | conserved Plasmodium protein, unknown function                                  | 1.34  | 32.46   | 74.31   |
| PF3D7_1205700   | targeted glyoxalase II (tGloII)                                                 | -0.68 | 6.33    | 3.57    |
| PF3D7_1205800   | high mobility group protein B3, putative (HMGB3)                                | -0.54 | 130.94  | 81.24   |
| PF3D7_1205900   | conserved protein, unknown function                                             | -0.21 | 74.33   | 57.93   |
| PF3D7_1206000   | shewanella-like protein phosphatase 2 (SHLP2)                                   | 0.53  | 59.51   | 77.62   |
| PF3D7_1206100   | IMP-specific 5'-nucleotidase, putative                                          | 1.22  | 4.85    | 10.18   |
| PF3D7_1206200   | eukaryotic translation initiation factor 3 subunit C, putative (EIF3C)          | 0.02  | 290.20  | 266.22  |
| PF3D7_1206300   | conserved Plasmodium protein, unknown function                                  | 0.29  | 12.68   | 13.94   |
| PF3D7_1206400   | rhodanese like protein, putative                                                | -1.72 | 1.36    | 0.35    |
| PF3D7_1206500   | Tat binding protein 1 (TBP-1)-interacting protein, putative                     | 1.06  | 1.99    | 3.77    |
| PF3D7_1206600   | DNA-directed RNA polymerase III subunit, putative                               | -0.43 | 131.33  | 88.17   |
| PF3D7_1206700   | eukaryotic translation initiation factor 5, putative                            | -0.31 | 228.80  | 166.46  |
| PF3D7_1206800   | conserved Plasmodium protein, unknown function                                  | -0.78 | 15.09   | 7.92    |
| PF3D7_1206900   | conserved Plasmodium protein, unknown function                                  | 0.18  | 4.31    | 4.42    |
| PF3D7_1207000   | conserved Plasmodium protein, unknown function                                  | 0.32  | 17.80   | 20.03   |
| PF3D7_1207100   | small subunit rRNA processing factor, putative                                  | -0.06 | 138.63  | 120.31  |
| PF3D7_1207200   | conserved Plasmodium protein, unknown function                                  | -1.01 | 2.16    | 0.96    |
| PF3D7_1207300   | conserved Plasmodium protein, unknown function                                  | 1.41  | 0.34    | 0.91    |
| PF3D7_1207400   | conserved Plasmodium protein, unknown function                                  | 2.48  | 1.09    | 5.56    |
| PF3D7_1207500   | RNA-binding protein, putative                                                   | -0.18 | 14.85   | 11.79   |
| PF3D7_1207600   | tRNA delta(2)-isopentenylpyrophosphate transferase, putative (MiaA)             | -0.13 | 32.58   | 26.82   |
| PF3D7_1207700   | blood stage antigen 41-3 precursor                                              | 2.39  | 0.52    | 2.51    |
| PF3D7_1207800   | conserved Plasmodium protein, unknown function                                  | 1.33  | 4.21    | 9.55    |
| PF3D7_1207900   | conserved Plasmodium protein, unknown function                                  | 0.67  | 3.04    | 4.37    |
| PF3D7_1208000   | apicoplast ribosomal protein L29 precursor, putative                            | -1.49 | 3.50    | 1.08    |
| PF3D7_1208100   | conserved Plasmodium protein, unknown function                                  | -1.04 | 23.12   | 10.15   |
| PF3D7_1208200   | cysteine repeat modular protein 3 (CRMP3)                                       | 0.84  | 0.43    | 0.70    |
| PF3D7_1208300   | mitochondrial ACP precursor, putative                                           | 1.00  | 16.82   | 30.37   |
| PF3D7_1208400   | amino acid transporter, putative                                                | -0.26 | 5.34    | 4.02    |
| PF3D7_1208500   | conserved Plasmodium protein, unknown function                                  | -0.15 | 1.37    | 1.12    |
| PF3D7_1208600   | mitochondrial import inner membrane translocase subunit TIM10, putative (TIM10) | 0.70  | 21.91   | 32.12   |
| PF3D7_1208700   | conserved protein, unknown function                                             | -0.38 | 6.06    | 4.19    |
| PF3D7_1208800   | zinc finger protein, putative                                                   | -0.87 | 61.44   | 30.24   |
| PF3D7_1208900   | protein phosphatase, putative                                                   | 0.66  | 68.37   | 97.16   |
| PF3D7_1209000   | conserved Plasmodium protein, unknown function                                  | -0.01 | 37.02   | 33.13   |
| PF3D7_1209100   | conserved Plasmodium protein, unknown function                                  | -0.61 | 2.83    | 1.67    |
| PF3D7_1209200   | U6 snRNA-associated Sm-like protein LSM7, putative (LSM7)                       | 0.23  | 101.79  | 107.40  |
| PF3D7_1209300   | zinc finger transcription factor, putative (KROX1)                              | 1.59  | 33.79   | 91.91   |
| PF3D7_1209400   | cytosolic iron-sulfur protein assembly protein 1, putative (CIA1)               | 2.27  | 12.09   | 52.80   |
| PF3D7_1209500.1 | cGMP-specific phosphodiesterase (PDE1)                                          | -0.03 | 8.72    | 7.72    |
| PF3D7_1209500.2 | cGMP-specific phosphodiesterase (PDE1)                                          | -0.02 | 9.30    | 8.25    |
| PF3D7_1209600   | porphobilinogen deaminase (PBGD)                                                | 0.28  | 5.22    | 5.72    |
| PF3D7_1209700   | conserved Plasmodium protein, unknown function                                  | 0.10  | 6.63    | 6.43    |
| PF3D7_1209800   | ATP synthase mitochondrial F1 complex assembly factor 1, putative (ATP11)       | -1.77 | 4.24    | 1.09    |
| PF3D7_1209900   | ABC transporter B family member 7, putative (ABCB7)                             | 0.17  | 6.11    | 6.21    |
| PF3D7_1210000   | 50S ribosomal protein L1, apicoplast, putative (RPL1)                           | 0.38  | 13.62   | 15.94   |
| PF3D7_1210100   | syntaxin, Qa-SNARE family (SYN2)                                                | 0.85  | 13.35   | 21.65   |
| PF3D7_1210200   | zinc finger protein, putative                                                   | 1.27  | 0.65    | 1.42    |
| PF3D7_1210300   | conserved Plasmodium protein, unknown function                                  | -0.94 | 20.62   | 9.69    |
| PF3D7_1210400   | general transcription factor 3C polypeptide 5, putative                         | -0.55 | 35.56   | 21.97   |
| PF3D7_1210500   | conserved Plasmodium protein, unknown function                                  | -1.43 | 1.50    | 0.49    |
| PF3D7_1210600   | conserved Plasmodium protein, unknown function                                  | 0.01  | 76.98   | 69.96   |
| PF3D7_1210700   | conserved Plasmodium protein, unknown function                                  | -0.30 | 3.92    | 2.87    |
| PF3D7_1210800   | small nucleolar RNA snoR14                                                      | -0.55 | 2.02    | 1.15    |
| PF3D7_1210900   | GPI mannosyltransferase I (PIGM)                                                | 0.51  | 4.22    | 5.42    |
| PF3D7_1211000   | kinesin-7, putative                                                             | 1.52  | 2.41    | 6.25    |
| PF3D7_1211100   | HSP20-like chaperone                                                            | 1.46  | 5.18    | 12.94   |
| PF3D7_1211200   | conserved Plasmodium protein, unknown function                                  | -0.64 | 32.68   | 18.94   |
| PF3D7_1211300   | DNA helicase MCM8, putative (MCM8)                                              | 0.69  | 8.83    | 12.89   |
| PF3D7_1211400   | heat shock protein DNAJ homologue Pfj4 (Pj4)                                    | 0.10  | 392.01  | 378.60  |
| PF3D7_1211500   | mitochondrial ribosomal protein S18 precursor, putative                         | -0.51 | 19.34   | 12.21   |
| PF3D7_1211600   | lysine-specific histone demethylase 1, putative (LSD1)                          | -0.20 | 17.30   | 13.54   |
| PF3D7_1211700   | DNA replication licensing factor MCM5, putative (MCM5)                          | 0.44  | 75.86   | 92.56   |
| PF3D7_1211800   | polyubiquitin (PfpUB)                                                           | -0.10 | 2818.58 | 2370.59 |
| PF3D7_1211900   | non-SERCA-type Ca <sup>2+</sup> -transporting P-ATPase (ATP4)                   | -0.91 | 221.99  | 106.32  |
| PF3D7_1212000   | glutathione peroxidase-like thioredoxin peroxidase (TPx(GI))                    | 0.19  | 32.15   | 32.98   |
| PF3D7_1212100   | peripheral plastid protein 1, putative (PPP1)                                   | 0.21  | 10.46   | 10.93   |
| PF3D7_1212200   | conserved Plasmodium protein, unknown function                                  | 0.84  | 0.92    | 1.50    |
| PF3D7_1212300   | WD repeat-containing protein, putative                                          | 1.37  | 1.98    | 4.62    |
| PF3D7_1212400   | tetratricopeptide repeat family protein, putative                               | 0.17  | 3.77    | 3.83    |
| PF3D7_1212500   | glycerol-3-phosphate 1-O-acyltransferase (GAT)                                  | -0.78 | 148.65  | 78.08   |
| PF3D7_1212600.1 | conserved protein, unknown function                                             | -0.21 | 11.20   | 8.74    |
| PF3D7_1212600.2 | conserved protein, unknown function                                             | -1.13 | 5.14    | 2.06    |
| PF3D7_1212700   | eukaryotic translation initiation factor 3 subunit A, putative (EIF3A)          | -0.08 | 1055.97 | 902.69  |
| PF3D7_1212800   | iron-sulfur subunit of succinate dehydrogenase                                  | 1.06  | 26.55   | 50.02   |
| PF3D7_1212900   | bromodomain protein 2, putative (BDP2)                                          | -0.47 | 215.89  | 140.66  |
| PF3D7_1213000   | unspecified product                                                             | -1.03 | 0.18    | 0.06    |
| PF3D7_1213100   | U1 spliceosomal RNA                                                             | 2.57  | 4.51    | 24.72   |
| PF3D7_1213200   | conserved Plasmodium protein, unknown function                                  | -0.74 | 10.57   | 5.70    |
| PF3D7_1213300   | conserved Plasmodium protein, unknown function                                  | 0.45  | 0.60    | 0.75    |
| PF3D7_1213400   | conserved Plasmodium protein, unknown function                                  | 1.81  | 0.88    | 2.82    |
| PF3D7_1213500   | integral membrane protein GPR180, putative                                      | 1.07  | 0.78    | 1.48    |
| PF3D7_1213600   | dynein light chain 1, putative (DLC8)                                           | 0.69  | 28.99   | 42.14   |
| PF3D7_1213700   | RNA polymerase subunit 8c, putative                                             | 0.44  | 35.08   | 43.01   |
| PF3D7_1213800   | proline-tRNA ligase (PRS)                                                       | -0.24 | 175.83  | 134.10  |
| PF3D7_1213900   | conserved Plasmodium protein, unknown function                                  | -1.48 | 147.89  | 47.96   |
| PF3D7_1214000   | conserved Plasmodium protein, unknown function                                  | 0.71  | 4.42    | 6.53    |
| PF3D7_1214100   | GPI ethanolamine phosphate transferase 3, putative (PIGO)                       | -0.56 | 7.51    | 4.60    |
| PF3D7_1214200   | histone-lysine N-methyltransferase, putative (SET5)                             | -0.13 | 3.75    | 3.09    |
| PF3D7_1214300   | geranylgeranyl transferase type2 beta subunit, putative                         | -0.99 | 40.40   | 18.40   |
| PF3D7_1214400   | ER membrane protein complex subunit 6, putative (EMC6)                          | -0.69 | 52.45   | 29.31   |
| PF3D7_1214500   | conserved Plasmodium protein, unknown function                                  | -0.43 | 4.51    | 3.00    |
| PF3D7_1214600   | adrenodoxin-type ferredoxin, putative                                           | -0.28 | 27.05   | 20.13   |

|                 |                                                                   |       |         |         |
|-----------------|-------------------------------------------------------------------|-------|---------|---------|
| PF3D7_1214700   | conserved Plasmodium protein, unknown function                    | 0.56  | 11.03   | 14.66   |
| PF3D7_1214800   | conserved Plasmodium protein, unknown function                    | 0.31  | 0.68    | 0.77    |
| PF3D7_1214900   | conserved Plasmodium membrane protein, unknown function           | 0.53  | 19.46   | 25.28   |
| PF3D7_1215000   | thioredoxin peroxidase 2 (Trx-Px2)                                | 1.00  | 13.73   | 24.87   |
| PF3D7_1215100   | conserved Plasmodium protein, unknown function                    | -0.20 | 14.60   | 11.47   |
| PF3D7_1215200   | peptidyl-prolyl cis-trans isomerase (CYP32)                       | 1.20  | 5.53    | 11.47   |
| PF3D7_1215300   | 10 kDa chaperonin (CPN10)                                         | 1.25  | 15.08   | 32.33   |
| PF3D7_1215400   | conserved Plasmodium protein, unknown function                    | 0.28  | 16.91   | 18.53   |
| PF3D7_1215500   | conserved Plasmodium protein, unknown function                    | -0.25 | 3.95    | 2.96    |
| PF3D7_1215600   | conserved Plasmodium protein, unknown function                    | 0.16  | 7.84    | 7.89    |
| PF3D7_1215700   | conserved Plasmodium protein, unknown function                    | 0.64  | 0.07    | 0.10    |
| PF3D7_1215800   | conserved Plasmodium protein, unknown function                    | 0.51  | 0.06    | 0.08    |
| PF3D7_1215900   | serpentine receptor, putative (SR10)                              | -1.63 | 18.38   | 5.34    |
| PF3D7_1216000   | serine-tRNA ligase, putative                                      | -0.81 | 19.81   | 10.19   |
| PF3D7_1216100   | conserved Plasmodium membrane protein, unknown function           | -1.09 | 2.01    | 0.84    |
| PF3D7_1216200   | glycerol-3-phosphate dehydrogenase, putative                      | -0.45 | 136.43  | 90.35   |
| PF3D7_1216300   | signal recognition particle subunit SRP19 (SRP19)                 | -0.33 | 98.14   | 70.65   |
| PF3D7_1216400   | conserved Plasmodium membrane protein, unknown function           | -0.34 | 75.68   | 53.80   |
| PF3D7_1216500   | male development gene 1 (MDV1)                                    | 1.77  | 31.41   | 96.89   |
| PF3D7_1216600   | cell traversal protein for ookinetes and sporozoites (CeTOS)      | 3.54  | 0.37    | 4.24    |
| PF3D7_1216700   | perforin-like protein 2 (PLP2)                                    | 0.15  | 5.04    | 5.03    |
| PF3D7_1216800   | tRNA Proline                                                      | -1.81 | 2.18    | 0.32    |
| PF3D7_1216900   | DNA-binding chaperone, putative                                   | -0.36 | 374.96  | 263.08  |
| PF3D7_1217000   | conserved Plasmodium protein, unknown function                    | -0.65 | 1.72    | 0.97    |
| PF3D7_1217100.1 | meiotic recombination protein SPO11, putative (SPO11)             | 0.26  | 3.87    | 4.19    |
| PF3D7_1217100.2 | meiotic recombination protein SPO11, putative (SPO11)             | 0.25  | 4.02    | 4.31    |
| PF3D7_1217200   | snRNA-associated small subunit rRNA processing protein, putative  | -0.34 | 101.50  | 72.28   |
| PF3D7_1217300   | GTP-binding protein, putative                                     | 0.34  | 58.07   | 66.31   |
| PF3D7_1217400   | conserved Plasmodium protein, unknown function                    | 0.23  | 26.45   | 28.09   |
| PF3D7_1217500   | conserved Plasmodium protein, unknown function                    | -1.36 | 219.79  | 77.34   |
| PF3D7_1217600   | anaphase promoting complex subunit 10, putative                   | -0.30 | 7.22    | 5.26    |
| PF3D7_1217700   | conserved Plasmodium protein, unknown function                    | -0.21 | 50.43   | 39.46   |
| PF3D7_1217800   | zinc finger protein, putative                                     | 0.08  | 28.11   | 26.82   |
| PF3D7_1217900   | conserved protein, unknown function                               | 0.03  | 19.30   | 17.78   |
| PF3D7_1218000   | thrombospondin-related apical membrane protein (TRAMP)            | 0.74  | 8.25    | 12.48   |
| PF3D7_1218100   | conserved Plasmodium protein, unknown function                    | 0.60  | 1.14    | 1.57    |
| PF3D7_1218200   | conserved Plasmodium protein, unknown function                    | -1.10 | 33.05   | 13.90   |
| PF3D7_1218300   | AP-2 complex subunit mu, putative (AP2-MU)                        | -1.35 | 83.57   | 29.60   |
| PF3D7_1218400   | triose or hexose phosphate/phosphate translocator, putative       | -0.57 | 134.41  | 81.96   |
| PF3D7_1218500   | conserved Plasmodium protein, unknown function                    | -1.12 | 140.85  | 58.48   |
| PF3D7_1218600   | arginine-tRNA ligase, putative                                    | -0.95 | 82.92   | 38.64   |
| PF3D7_1218700   | conserved Plasmodium protein, unknown function                    | -0.40 | 2.13    | 1.45    |
| PF3D7_1218800   | secreted ookinete protein, putative (PSOP17)                      | 0.79  | 4.16    | 6.49    |
| PF3D7_1218900   | conserved Plasmodium protein, unknown function                    | -0.49 | 11.63   | 7.45    |
| PF3D7_1219000   | formin 2                                                          | 0.82  | 25.56   | 40.68   |
| PF3D7_1219100   | clathrin heavy chain, putative                                    | -1.09 | 83.49   | 35.40   |
| PF3D7_1219200   | rifin, pseudogene (RIF)                                           | -0.10 | 6.55    | 5.50    |
| PF3D7_1219300   | erythrocyte membrane protein 1, PfEMP1 (VAR)                      | -0.24 | 2.27    | 1.74    |
| PF3D7_1219400   | erythrocyte membrane protein 1 (PfEMP1), pseudogene (VAR)         | 0.01  | 15.26   | 13.87   |
| PF3D7_1219500   | erythrocyte membrane protein 1 (PfEMP1), exon 2, pseudogene (VAR) | 0.88  | 0.33    | 0.57    |
| PF3D7_1219600   | aminophospholipid-transporting P-ATPase (ATPase2)                 | -0.67 | 74.30   | 42.06   |
| PF3D7_1219700   | raf kinase inhibitor (RKIP)                                       | 1.28  | 1.95    | 4.34    |
| PF3D7_1219800   | conserved Plasmodium protein, unknown function                    | -2.13 | 0.55    | 0.00    |
| PF3D7_1219900   | D-ribulose-5-phosphate 3-epimerase, putative                      | 0.01  | 16.41   | 14.92   |
| PF3D7_1220000   | conserved Plasmodium protein, unknown function                    | 1.38  | 0.39    | 0.95    |
| PF3D7_1220100   | pre-mRNA-processing factor 17, putative (PRP17)                   | -0.42 | 46.32   | 31.33   |
| PF3D7_1220200   | conserved Plasmodium protein, unknown function, pseudogene        | -1.01 | 0.91    | 0.40    |
| PF3D7_1220300   | cell cycle associated protein, putative                           | 0.24  | 5.33    | 5.67    |
| PF3D7_1220400   | debranching enzyme-associated ribonuclease, putative (DRN1)       | -0.51 | 18.85   | 11.94   |
| PF3D7_1220500   | ribosome biogenesis protein TSR3, putative (TSR3)                 | -1.09 | 21.95   | 9.26    |
| PF3D7_1220600   | conserved Plasmodium protein, unknown function                    | -0.50 | 10.31   | 6.59    |
| PF3D7_1220700   | conserved Plasmodium protein, unknown function                    | 1.11  | 0.78    | 1.55    |
| PF3D7_1220800   | unspecified product                                               | -0.74 | 0.67    | 0.35    |
| PF3D7_1220900   | heterochromatin protein 1 (HP1)                                   | 0.33  | 374.45  | 425.81  |
| PF3D7_1221000   | histone-lysine N-methyltransferase, H3 lysine-4 specific (SET10)  | 0.11  | 21.70   | 21.09   |
| PF3D7_1221100   | conserved Plasmodium protein, unknown function                    | -0.47 | 2.15    | 1.38    |
| PF3D7_1221200   | conserved Plasmodium protein, unknown function                    | 0.41  | 23.31   | 27.91   |
| PF3D7_1221300   | conserved Plasmodium protein, unknown function                    | 0.62  | 21.43   | 29.66   |
| PF3D7_1221400   | inner membrane complex protein 1h, putative (IMC1h)               | 1.86  | 7.91    | 25.95   |
| PF3D7_1221500   | conserved Plasmodium protein, unknown function                    | 1.06  | 1.55    | 2.92    |
| PF3D7_1221600   | protein TSSC1, putative                                           | 1.11  | 1.89    | 3.68    |
| PF3D7_1221700   | FbpA domain protein, putative                                     | -0.43 | 5.71    | 3.83    |
| PF3D7_1221800   | conserved Plasmodium protein, unknown function                    | 0.14  | 11.87   | 11.83   |
| PF3D7_1221900   | conserved Plasmodium membrane protein, unknown function           | -0.99 | 365.58  | 166.07  |
| PF3D7_1222000   | conserved protein, unknown function                               | 0.11  | 4.15    | 4.05    |
| PF3D7_1222100   | conserved Plasmodium protein, unknown function                    | -0.16 | 8.04    | 6.49    |
| PF3D7_1222200   | small nucleolar RNA snoR15                                        | -0.30 | 0.93    | 0.64    |
| PF3D7_1222300   | endoplasmic reticulum chaperone, putative (GRP94)                 | 0.45  | 198.90  | 245.50  |
| PF3D7_1222400   | transcription factor with AP2 domain(s) (ApiAP2)                  | 0.25  | 8.41    | 9.01    |
| PF3D7_1222500   | ATP-binding protein, putative                                     | 0.31  | 40.55   | 45.50   |
| PF3D7_1222600   | transcription factor with AP2 domain(s) (AP2-G)                   | -1.94 | 13.48   | 3.18    |
| PF3D7_1222700   | glideosome-associated protein 45 (GAP45)                          | 1.49  | 209.72  | 530.48  |
| PF3D7_1222800   | conserved Plasmodium protein, unknown function                    | 0.55  | 1.07    | 1.42    |
| PF3D7_1222900   | conserved Plasmodium protein, unknown function                    | 0.24  | 3.06    | 3.26    |
| PF3D7_1223000   | conserved Plasmodium protein, unknown function                    | 0.88  | 13.16   | 21.84   |
| PF3D7_1223100   | cAMP-dependent protein kinase regulatory subunit (PKAr)           | 0.53  | 219.91  | 286.30  |
| PF3D7_1223200   | nucleus export protein BRR6, putative                             | -1.21 | 52.86   | 20.55   |
| PF3D7_1223300   | DNA gyrase subunit A (GyrA)                                       | -1.07 | 22.85   | 9.80    |
| PF3D7_1223400   | phospholipid-transporting ATPase, putative                        | -0.49 | 280.35  | 179.77  |
| PF3D7_1223500   | conserved Plasmodium protein, unknown function                    | -0.79 | 17.88   | 9.32    |
| PF3D7_1223600   | conserved Plasmodium protein, unknown function                    | -1.22 | 4.12    | 1.59    |
| PF3D7_1223700   | iron transporter, putative                                        | 0.57  | 36.92   | 49.39   |
| PF3D7_1223800   | mitochondrial carrier protein, putative                           | -0.62 | 48.11   | 28.32   |
| PF3D7_1223900   | 50S ribosomal protein L24, putative                               | 1.83  | 6.12    | 19.76   |
| PF3D7_1224000   | GTP cyclohydrolase I (GCH1)                                       | -0.66 | 38.81   | 22.10   |
| PF3D7_1224100   | conserved Plasmodium protein, unknown function                    | 0.14  | 34.90   | 34.76   |
| PF3D7_1224200   | conserved Plasmodium protein, unknown function                    | 0.61  | 4.19    | 5.77    |
| PF3D7_1224300   | polyadenylate-binding protein, putative (PABP)                    | -0.04 | 2688.29 | 2366.89 |

|                 |                                                                           |       |        |        |
|-----------------|---------------------------------------------------------------------------|-------|--------|--------|
| PF3D7_1224400   | conserved Plasmodium protein, unknown function                            | -1.16 | 57.70  | 23.26  |
| PF3D7_1224500   | histone chaperone ASF1, putative (ASF1)                                   | -0.15 | 49.60  | 40.23  |
| PF3D7_1224600   | cytochrome c heme lyase, putative                                         | -0.21 | 34.02  | 26.47  |
| PF3D7_1224700   | conserved Plasmodium protein, unknown function                            | -0.68 | 33.32  | 18.73  |
| PF3D7_1224800   | conserved Plasmodium protein, unknown function                            | -0.52 | 19.33  | 12.15  |
| PF3D7_1224900   | splicing factor 3B subunit 6, putative (SF3B6)                            | 0.89  | 28.47  | 47.71  |
| PF3D7_1225000   | conserved Plasmodium protein, unknown function                            | 0.18  | 0.73   | 0.75   |
| PF3D7_1225100   | isoleucine--tRNA ligase, putative                                         | 0.30  | 2.13   | 2.37   |
| PF3D7_1225200   | conserved Plasmodium protein, unknown function                            | -1.02 | 47.29  | 20.98  |
| PF3D7_1225300   | conserved Plasmodium protein, unknown function                            | -0.18 | 84.61  | 67.56  |
| PF3D7_1225400   | conserved Plasmodium protein, unknown function                            | -0.82 | 26.93  | 13.74  |
| PF3D7_1225500   | small subunit rRNA processing factor, putative                            | -1.12 | 58.37  | 24.14  |
| PF3D7_1225600   | conserved Plasmodium protein, unknown function                            | -0.57 | 74.53  | 45.33  |
| PF3D7_1225700   | conserved Plasmodium protein, unknown function                            | -0.69 | 62.31  | 34.89  |
| PF3D7_1225800   | ubiquitin-activating enzyme E1 (UBA1)                                     | -0.55 | 131.51 | 81.15  |
| PF3D7_1225900   | conserved Plasmodium protein, unknown function                            | -0.38 | 5.70   | 3.94   |
| PF3D7_1226000   | conserved Plasmodium protein, unknown function                            | 0.66  | 1.50   | 2.15   |
| PF3D7_1226100   | haloacid dehalogenase-like hydrolase, putative (HAD3)                     | 1.79  | 5.91   | 18.53  |
| PF3D7_1226200   | conserved Plasmodium protein, unknown function                            | -1.64 | 4.16   | 1.20   |
| PF3D7_1226300   | haloacid dehalogenase-like hydrolase, putative (HAD2)                     | -0.14 | 389.50 | 318.17 |
| PF3D7_1226400   | conserved Plasmodium protein, unknown function                            | -0.30 | 28.57  | 20.90  |
| PF3D7_1226500   | RAP protein, putative                                                     | 0.33  | 2.71   | 3.07   |
| PF3D7_1226600   | proliferating cell nuclear antigen 2 (PCNA2)                              | 0.82  | 18.96  | 30.13  |
| PF3D7_1226700   | U3 small nucleolar RNA-interacting protein 2, putative (RRP9)             | -0.31 | 52.24  | 38.03  |
| PF3D7_1226800   | ataxin-3, putative (ATX3)                                                 | 0.32  | 14.01  | 15.80  |
| PF3D7_1226900   | conserved Plasmodium protein, unknown function                            | 0.01  | 8.73   | 7.92   |
| PF3D7_1227000   | conserved Plasmodium protein, unknown function                            | -0.72 | 7.38   | 4.03   |
| PF3D7_1227100   | DNA helicase 60 (DH60)                                                    | 0.17  | 36.26  | 36.83  |
| PF3D7_1227200   | potassium channel (K1)                                                    | -1.13 | 35.02  | 14.43  |
| PF3D7_1227300   | conserved Plasmodium protein, unknown function                            | -0.55 | 3.60   | 2.22   |
| PF3D7_1227400   | conserved Plasmodium protein, unknown function                            | -0.72 | 32.18  | 17.59  |
| PF3D7_1227500   | cyclin (CYC2)                                                             | 0.25  | 14.99  | 16.10  |
| PF3D7_1227600   | cyclin related protein, putative                                          | 0.07  | 42.74  | 40.48  |
| PF3D7_1227700   | conserved Plasmodium protein, unknown function                            | -0.04 | 98.48  | 86.28  |
| PF3D7_1227800   | histone S-adenosyl methyltransferase, putative                            | -0.25 | 130.24 | 98.69  |
| PF3D7_1227900   | RNA pseudouridylylase, putative                                           | -1.98 | 21.90  | 4.99   |
| PF3D7_1228000   | conserved Plasmodium protein, unknown function                            | -0.16 | 9.03   | 7.26   |
| PF3D7_1228100   | leucine-rich repeat protein (LRR13)                                       | 0.22  | 4.97   | 5.23   |
| PF3D7_1228200   | conserved Plasmodium protein, unknown function                            | 0.86  | 0.50   | 0.82   |
| PF3D7_1228300   | NIMA related kinase 1 (NEK1)                                              | 0.94  | 30.57  | 52.85  |
| PF3D7_1228400   | conserved Plasmodium protein, unknown function                            | -1.27 | 115.96 | 43.23  |
| PF3D7_1228500   | RNA pseudouridylylase, putative                                           | 0.29  | 10.56  | 11.65  |
| PF3D7_1228600   | merozoite surface protein 9 (MSP9)                                        | -0.19 | 826.10 | 653.59 |
| PF3D7_1228700   | conserved Plasmodium protein, unknown function                            | 0.20  | 13.62  | 14.12  |
| PF3D7_1228800   | WD repeat-containing protein, putative                                    | 0.37  | 47.00  | 54.75  |
| PF3D7_1228900   | conserved Plasmodium protein, unknown function                            | 0.29  | 33.35  | 36.77  |
| PF3D7_1229000   | conserved Plasmodium membrane protein, unknown function                   | -0.69 | 19.18  | 10.71  |
| PF3D7_1229100   | multidrug resistance-associated protein 2 (MRP2)                          | -1.52 | 690.70 | 216.95 |
| PF3D7_1229200   | unspecified product                                                       | -2.27 | 2.51   | 0.45   |
| PF3D7_1229300   | conserved Plasmodium protein, unknown function                            | -0.87 | 64.96  | 32.14  |
| PF3D7_1229400   | macrophage migration inhibitory factor (MIF)                              | 0.01  | 570.46 | 519.72 |
| PF3D7_1229500   | T-complex protein 1 subunit gamma (CCT3)                                  | -0.05 | 326.11 | 283.95 |
| PF3D7_1229600   | conserved Plasmodium protein, unknown function                            | 0.66  | 13.80  | 19.62  |
| PF3D7_1229700   | conserved Plasmodium protein, unknown function                            | 1.07  | 3.33   | 6.38   |
| PF3D7_1229800   | myosin D (MyoD)                                                           | 0.77  | 18.66  | 28.75  |
| PF3D7_1229900.1 | conserved Plasmodium protein, unknown function                            | -0.11 | 8.97   | 7.48   |
| PF3D7_1229900.2 | conserved Plasmodium protein, unknown function                            | -0.11 | 8.93   | 7.47   |
| PF3D7_1230000   | conserved Plasmodium protein, unknown function                            | -0.26 | 11.10  | 8.37   |
| PF3D7_1230100   | thioredoxin-like associated protein 1, putative (TLAP1)                   | 1.64  | 3.44   | 9.72   |
| PF3D7_1230200   | vacuolar transporter chaperone, putative, pseudogene                      | 1.58  | 2.84   | 7.64   |
| PF3D7_1230300   | subpellicular microtubule protein 2, putative (SPM2)                      | 0.90  | 3.17   | 5.36   |
| PF3D7_1230400   | ATP-dependent protease subunit ClpQ (ClpQ)                                | 0.28  | 19.64  | 21.52  |
| PF3D7_1230500   | WD repeat-containing protein, putative                                    | -1.12 | 47.26  | 19.55  |
| PF3D7_1230600   | sun-family protein, putative                                              | 0.53  | 18.34  | 23.82  |
| PF3D7_1230700   | protein transport protein SEC13 (SEC13)                                   | -0.56 | 301.94 | 184.20 |
| PF3D7_1230800   | conserved Plasmodium protein, unknown function                            | -0.38 | 148.11 | 102.46 |
| PF3D7_1230900   | serine/threonine protein kinase RIO1, putative (RIO1)                     | -0.31 | 211.25 | 153.70 |
| PF3D7_1231000   | conserved Plasmodium protein, unknown function                            | 0.42  | 7.82   | 9.44   |
| PF3D7_1231100   | ras-related protein Rab-2 (RAB2)                                          | 0.44  | 103.35 | 126.41 |
| PF3D7_1231200   | conserved Plasmodium protein, unknown function                            | 1.83  | 6.46   | 20.79  |
| PF3D7_1231300   | conserved Plasmodium protein, unknown function                            | 2.00  | 1.80   | 6.51   |
| PF3D7_1231400   | amino acid transporter, putative                                          | 0.43  | 8.96   | 10.87  |
| PF3D7_1231500   | mitosis protein dim1, putative                                            | -0.29 | 49.17  | 36.24  |
| PF3D7_1231600   | pre-mRNA-splicing factor ATP-dependent RNA helicase PRP2, putative (PRP2) | -0.35 | 52.59  | 37.27  |
| PF3D7_1231700   | conserved Plasmodium protein, unknown function                            | -1.36 | 12.74  | 4.40   |
| PF3D7_1231800   | asparagine-rich protein, putative                                         | -2.01 | 127.64 | 28.68  |
| PF3D7_1231900   | conserved Plasmodium protein, unknown function                            | -0.78 | 3.24   | 1.70   |
| PF3D7_1232000   | phenylalanine--tRNA ligase (aFRS)                                         | -0.04 | 3.83   | 3.36   |
| PF3D7_1232100   | 60 kDa chaperonin (CPN60)                                                 | 0.19  | 59.28  | 60.92  |
| PF3D7_1232200   | dihydrolipoyl dehydrogenase, mitochondrial (LPD1)                         | 0.90  | 10.49  | 17.63  |
| PF3D7_1232300   | cytochrome b5, putative                                                   | 0.92  | 3.31   | 5.68   |
| PF3D7_1232400   | conserved protein, unknown function                                       | -1.05 | 44.35  | 19.29  |
| PF3D7_1232500   | CG2-related protein, putative                                             | 0.47  | 26.65  | 33.32  |
| PF3D7_1232600   | conserved Plasmodium protein, unknown function                            | 0.15  | 9.75   | 9.79   |
| PF3D7_1232700   | conserved Plasmodium protein, unknown function                            | 0.23  | 9.57   | 10.10  |
| PF3D7_1232800   | conserved Plasmodium protein, unknown function                            | 0.43  | 3.39   | 4.13   |
| PF3D7_1232900   | nucleotidyltransferase, putative                                          | 0.32  | 4.63   | 5.23   |
| PF3D7_1233000   | elongation factor G (EF-G)                                                | 0.18  | 12.08  | 12.37  |
| PF3D7_1233100   | conserved protein, unknown function                                       | -0.18 | 43.21  | 34.38  |
| PF3D7_1233200.1 | conserved Plasmodium protein, unknown function                            | 0.30  | 5.97   | 6.63   |
| PF3D7_1233200.2 | conserved Plasmodium protein, unknown function                            | 0.30  | 5.98   | 6.64   |
| PF3D7_1233300   | pentatricopeptide repeat protein, putative                                | 1.19  | 4.29   | 8.86   |
| PF3D7_1233400   | conserved Plasmodium membrane protein, unknown function                   | -0.81 | 56.25  | 28.92  |
| PF3D7_1233600   | asparagine and aspartate rich protein 1 (AARP1)                           | -0.33 | 55.30  | 39.62  |
| PF3D7_1233700   | homocysteine S-methyltransferase, putative                                | -0.52 | 3.14   | 1.98   |
| PF3D7_1233800   | conserved Plasmodium protein, unknown function                            | 0.28  | 41.91  | 45.76  |
| PF3D7_1233900   | senrin-specific protease 1 (SEN1)                                         | -0.76 | 35.06  | 18.73  |
| PF3D7_1234000   | conserved Plasmodium protein, unknown function                            | -0.74 | 12.95  | 6.99   |

|               |                                                                                                  |       |         |         |
|---------------|--------------------------------------------------------------------------------------------------|-------|---------|---------|
| PF3D7_1234100 | bromodomain protein, putative                                                                    | -0.49 | 45.33   | 29.19   |
| PF3D7_1234200 | conserved Plasmodium protein, unknown function, pseudogene                                       | 0.67  | 6.23    | 8.93    |
| PF3D7_1234300 | DNA polymerase epsilon subunit b, putative                                                       | 0.05  | 7.28    | 6.80    |
| PF3D7_1234400 | aspartyl protease, putative                                                                      | -0.24 | 1.24    | 0.95    |
| PF3D7_1234500 | conserved Plasmodium protein, unknown function                                                   | -0.71 | 30.78   | 16.93   |
| PF3D7_1234600 | conserved Plasmodium protein, unknown function                                                   | -0.09 | 8.69    | 7.36    |
| PF3D7_1234700 | CPW-WPC family protein                                                                           | 1.33  | 1.78    | 4.04    |
| PF3D7_1234800 | splicing factor 3B subunit 3, putative (SF3B3)                                                   | -0.38 | 99.82   | 69.16   |
| PF3D7_1234900 | conserved Plasmodium protein, unknown function                                                   | 0.78  | 133.27  | 206.92  |
| PF3D7_1235000 | PIH1 domain-containing protein, putative (PIH1)                                                  | 1.17  | 1.85    | 3.77    |
| PF3D7_1235100 | conserved Plasmodium protein, unknown function                                                   | 0.76  | 5.39    | 8.32    |
| PF3D7_1235200 | V-type K <sup>+</sup> -independent H <sup>+</sup> -translocating inorganic pyrophosphatase (VP2) | 0.17  | 25.57   | 25.96   |
| PF3D7_1235300 | CCR4-NOT transcription complex subunit 4, putative (NOT4)                                        | -0.32 | 214.66  | 155.42  |
| PF3D7_1235400 | tetQ family GTPase, putative                                                                     | 0.34  | 6.09    | 6.94    |
| PF3D7_1235500 | mRNA methyltransferase, putative                                                                 | -0.59 | 48.71   | 29.16   |
| PF3D7_1235600 | serine hydroxymethyltransferase (SHMT)                                                           | 0.90  | 64.94   | 109.22  |
| PF3D7_1235700 | ATP synthase subunit beta, mitochondrial                                                         | 1.13  | 24.75   | 48.82   |
| PF3D7_1235800 | conserved Plasmodium protein, unknown function                                                   | 0.94  | 0.65    | 1.12    |
| PF3D7_1235900 | pre-mRNA-splicing factor SYF1, putative (XAB2)                                                   | -0.75 | 63.56   | 34.16   |
| PF3D7_1236000 | vesicle transport v-SNARE protein VTI1, putative                                                 | -0.50 | 18.48   | 11.79   |
| PF3D7_1236100 | clustered-asparagine-rich protein                                                                | -1.52 | 401.03  | 126.42  |
| PF3D7_1236200 | conserved Plasmodium protein, unknown function                                                   | 1.91  | 21.34   | 72.23   |
| PF3D7_1236300 | conserved Plasmodium protein, unknown function                                                   | 0.45  | 7.64    | 9.42    |
| PF3D7_1236400 | conserved Plasmodium protein, unknown function                                                   | -0.63 | 62.38   | 36.24   |
| PF3D7_1236500 | conserved Plasmodium protein, unknown function                                                   | 1.91  | 0.88    | 3.07    |
| PF3D7_1236600 | p25-alpha family protein, putative                                                               | 0.91  | 2.64    | 4.52    |
| PF3D7_1236700 | S-adenosyl-methyltransferase, putative                                                           | -0.35 | 13.30   | 9.41    |
| PF3D7_1236800 | protein-S-isoprenylcysteine O-methyltransferase, putative                                        | -0.42 | 13.43   | 9.03    |
| PF3D7_1236900 | conserved Plasmodium protein, unknown function                                                   | 0.61  | 26.16   | 35.91   |
| PF3D7_1237000 | SUMO-activating enzyme subunit 2 (UBA2)                                                          | -0.48 | 20.85   | 13.51   |
| PF3D7_1237100 | conserved Plasmodium protein, unknown function                                                   | 0.47  | 8.23    | 10.29   |
| PF3D7_1237200 | conserved Plasmodium protein, unknown function                                                   | -0.36 | 44.78   | 31.51   |
| PF3D7_1237300 | conserved Plasmodium protein, unknown function                                                   | -0.88 | 1.55    | 0.75    |
| PF3D7_1237400 | conserved Plasmodium protein, unknown function                                                   | 0.05  | 23.64   | 22.14   |
| PF3D7_1237500 | conserved Plasmodium protein, unknown function                                                   | -1.03 | 71.38   | 31.48   |
| PF3D7_1237600 | periodic tryptophan protein 1, putative (PWP1)                                                   | -0.81 | 43.42   | 22.28   |
| PF3D7_1237700 | conserved protein, unknown function                                                              | 0.31  | 188.58  | 210.40  |
| PF3D7_1237800 | ubiquitin-like modifier HUB1, putative (HUB1)                                                    | -0.62 | 23.71   | 13.90   |
| PF3D7_1237900 | conserved Plasmodium protein, unknown function                                                   | 0.19  | 225.19  | 232.39  |
| PF3D7_1238000 | COPI associated protein, putative                                                                | -0.30 | 22.65   | 16.54   |
| PF3D7_1238100 | calyculin binding protein, putative                                                              | 0.18  | 116.92  | 119.37  |
| PF3D7_1238200 | conserved Plasmodium protein, unknown function                                                   | 0.00  | 0.51    | 0.46    |
| PF3D7_1238300 | cell cycle control protein, putative                                                             | -0.30 | 133.65  | 98.04   |
| PF3D7_1238400 | conserved Plasmodium protein, unknown function                                                   | 0.21  | 2.02    | 2.11    |
| PF3D7_1238500 | conserved Plasmodium protein, unknown function                                                   | 1.25  | 12.78   | 27.32   |
| PF3D7_1238600 | sphingomyelin phosphodiesterase, putative                                                        | 0.35  | 36.69   | 42.22   |
| PF3D7_1238700 | conserved Plasmodium protein, unknown function                                                   | 0.19  | 8.13    | 8.39    |
| PF3D7_1238800 | acyl-CoA synthetase (ACS11)                                                                      | -0.58 | 255.03  | 154.21  |
| PF3D7_1238900 | protein kinase 2 (PK2)                                                                           | 0.67  | 16.05   | 23.03   |
| PF3D7_1239000 | HD superfamily phosphohydrolase protein                                                          | 0.46  | 32.87   | 40.83   |
| PF3D7_1239100 | mitochondrial ribosomal protein L23 precursor, putative                                          | 0.98  | 9.57    | 17.09   |
| PF3D7_1239200 | transcription factor with AP2 domain(s) (ApiAP2)                                                 | 0.17  | 31.60   | 32.15   |
| PF3D7_1239300 | conserved Plasmodium protein, unknown function                                                   | -1.70 | 54.48   | 15.09   |
| PF3D7_1239400 | conserved Plasmodium protein, unknown function                                                   | 1.83  | 1.08    | 3.54    |
| PF3D7_1239500 | DNA gyrase subunit B (GyrB)                                                                      | 0.27  | 7.92    | 8.64    |
| PF3D7_1239600 | hydroxyethylthiazole kinase (ThzK)                                                               | 0.76  | 12.47   | 19.00   |
| PF3D7_1239700 | ATP-dependent zinc metalloprotease FTSH 1 (FTSH1)                                                | 0.49  | 51.16   | 64.69   |
| PF3D7_1239800 | conserved Plasmodium protein, unknown function                                                   | 0.17  | 6.52    | 6.59    |
| PF3D7_1239900 | vacuolar protein sorting-associated protein 16, putative (VPS16)                                 | -0.43 | 33.21   | 22.23   |
| PF3D7_1240000 | 3-hydroxyisobutyryl-coenzyme A hydrolase, putative                                               | -1.10 | 32.22   | 13.57   |
| PF3D7_1240100 | early transcribed membrane protein 12 (ETRAMP12)                                                 | -0.15 | 17.89   | 14.48   |
| PF3D7_1240200 | erythrocyte membrane protein 1 (PfEMP1), pseudogene                                              | -1.79 | 0.99    | 0.25    |
| PF3D7_1240300 | erythrocyte membrane protein 1, PfEMP1 (VAR)                                                     | 1.33  | 2.61    | 5.94    |
| PF3D7_1240400 | erythrocyte membrane protein 1, PfEMP1 (VAR)                                                     | 0.34  | 9.36    | 10.70   |
| PF3D7_1240500 | Plasmodium RNA of unknown function RUF6-5                                                        | -1.45 | 36.80   | 12.01   |
| PF3D7_1240600 | erythrocyte membrane protein 1, PfEMP1 (VAR)                                                     | 0.41  | 967.17  | 1163.20 |
| PF3D7_1240700 | rifin, pseudogene (RIF)                                                                          | 0.30  | 1.01    | 1.13    |
| PF3D7_1240800 | Plasmodium RNA of unknown function RUF6-14                                                       | 0.19  | 0.00    | 0.00    |
| PF3D7_1240900 | erythrocyte membrane protein 1, PfEMP1 (VAR)                                                     | -0.56 | 12.42   | 7.59    |
| PF3D7_1241000 | Plasmodium RNA of unknown function RUF6-15                                                       | 0.19  | 0.00    | 0.00    |
| PF3D7_1241100 | polyadenylation factor subunit 2, putative (PFS2)                                                | -0.03 | 98.16   | 87.01   |
| PF3D7_1241200 | conserved Plasmodium protein, unknown function                                                   | -0.64 | 18.39   | 10.64   |
| PF3D7_1241300 | conserved Plasmodium protein, unknown function                                                   | 0.84  | 1.98    | 3.22    |
| PF3D7_1241400 | RNA-binding protein, putative                                                                    | -0.24 | 1.48    | 1.13    |
| PF3D7_1241500 | conserved Plasmodium protein, unknown function                                                   | -0.09 | 5.96    | 5.03    |
| PF3D7_1241600 | mitochondrial carrier protein, putative                                                          | 0.44  | 3.54    | 4.33    |
| PF3D7_1241700 | replication factor C subunit 4, putative (RFC4)                                                  | 1.04  | 22.33   | 41.53   |
| PF3D7_1241800 | DEAD/DEAH box ATP-dependent RNA helicase, putative                                               | -0.10 | 159.64  | 134.39  |
| PF3D7_1241900 | tetratricopeptide repeat protein, putative                                                       | -0.62 | 105.99  | 62.32   |
| PF3D7_1242000 | conserved Plasmodium protein, unknown function                                                   | -0.89 | 10.57   | 5.15    |
| PF3D7_1242100 | conserved Plasmodium protein, unknown function                                                   | -2.05 | 16.23   | 3.45    |
| PF3D7_1242200 | queuine tRNA-ribosyltransferase, putative (TGT)                                                  | -0.30 | 27.33   | 20.06   |
| PF3D7_1242300 | conserved Plasmodium membrane protein, unknown function                                          | 1.06  | 5.55    | 10.51   |
| PF3D7_1242400 | GAS8-like protein, putative                                                                      | -0.44 | 2.80    | 1.86    |
| PF3D7_1242500 | conserved protein, unknown function                                                              | 0.02  | 7.99    | 7.29    |
| PF3D7_1242600 | protein geranylgeranyltransferase type II, alpha subunit, putative                               | -1.08 | 31.80   | 13.52   |
| PF3D7_1242700 | 40S ribosomal protein S17, putative                                                              | 0.14  | 1320.77 | 1309.60 |
| PF3D7_1242800 | rab specific GDP dissociation inhibitor (rabGDI)                                                 | -0.32 | 446.52  | 323.64  |
| PF3D7_1242900 | mitochondrial import inner membrane translocase subunit TIM13, putative (TIM13)                  | 0.50  | 15.63   | 19.91   |
| PF3D7_1243000 | syntaxin, Qa-SNARE family (SYN16)                                                                | 0.99  | 9.93    | 17.84   |
| PF3D7_1243100 | zinc finger protein, putative                                                                    | 0.35  | 63.70   | 73.45   |
| PF3D7_1243200 | conserved Plasmodium protein, unknown function                                                   | -1.58 | 2.93    | 0.82    |
| PF3D7_1243300 | conserved Plasmodium protein, unknown function                                                   | 2.87  | 0.37    | 2.97    |
| PF3D7_1243400 | conserved Plasmodium protein, unknown function                                                   | 1.20  | 2.39    | 4.98    |
| PF3D7_1243500 | vacuolar-sorting protein SNF7, putative (SNF7)                                                   | 0.57  | 16.94   | 22.62   |
| PF3D7_1243600 | translation initiation factor SUI1, putative                                                     | 0.19  | 356.34  | 366.10  |
| PF3D7_1243700 | ubiquitin-conjugating enzyme E2, putative                                                        | 1.70  | 40.83   | 119.62  |
| PF3D7_1243800 | WD repeat-containing protein 82, putative (WDR82)                                                | -0.22 | 60.90   | 47.05   |

|                 |                                                                      |       |        |         |
|-----------------|----------------------------------------------------------------------|-------|--------|---------|
| PF3D7_1243900   | double C2-like domain-containing protein (DOC2)                      | 0.24  | 9.82   | 10.44   |
| PF3D7_1244000   | glucose inhibited division protein a homologue, putative             | 0.08  | 8.31   | 7.93    |
| PF3D7_1244100   | N-alpha-acetyltransferase 15, NatA auxiliary subunit, putative       | -0.47 | 32.11  | 20.89   |
| PF3D7_1244200   | RNA polymerase II transcription factor B subunit 2, putative (TFB2)  | -0.93 | 70.24  | 33.34   |
| PF3D7_1244300   | ACEA small nucleolar RNA U3                                          | 2.07  | 5.65   | 21.70   |
| PF3D7_1244400   | conserved Plasmodium protein, unknown function                       | 1.46  | 15.50  | 38.61   |
| PF3D7_1244500   | conserved Plasmodium protein, unknown function                       | 1.52  | 2.67   | 6.94    |
| PF3D7_1244600   | ADP-ribosylation factor GTPase-activating protein, putative (ARFGAP) | -0.56 | 77.85  | 47.77   |
| PF3D7_1244700   | conserved Plasmodium protein, unknown function                       | 1.42  | 14.46  | 35.04   |
| PF3D7_1244800   | cytoplasmic translation machinery associated protein, putative       | 0.12  | 151.93 | 149.06  |
| PF3D7_1244900   | conserved Plasmodium protein, unknown function                       | 0.47  | 3.06   | 3.82    |
| PF3D7_1245000   | conserved Plasmodium protein, unknown function                       | -0.42 | 5.06   | 3.41    |
| PF3D7_1245100   | kinesin-13, putative (KLP8)                                          | 0.21  | 8.42   | 8.78    |
| PF3D7_1245200   | conserved Plasmodium membrane protein, unknown function              | 0.00  | 0.77   | 0.69    |
| PF3D7_1245300   | NEDD8-conjugating enzyme UBC12, putative (UBC12)                     | 1.99  | 3.07   | 11.13   |
| PF3D7_1245400   | mitochondrial ribosomal protein L3 precursor, putative               | 0.77  | 8.58   | 13.22   |
| PF3D7_1245500   | conserved Plasmodium protein, unknown function                       | 0.94  | 6.80   | 11.76   |
| PF3D7_1245600   | kinesin, putative                                                    | 0.90  | 0.57   | 0.96    |
| PF3D7_1245700   | unspecified product                                                  | -3.90 | 0.39   | 0.00    |
| PF3D7_1245800   | epsin, putative                                                      | -0.19 | 58.35  | 46.08   |
| PF3D7_1245900   | conserved Plasmodium protein, unknown function                       | -2.68 | 21.54  | 3.00    |
| PF3D7_1246000   | conserved Plasmodium protein, unknown function                       | -0.44 | 2.92   | 1.94    |
| PF3D7_1246100   | delta-aminolevulinic acid synthetase (ALAS)                          | 1.11  | 3.80   | 7.41    |
| PF3D7_1246200   | actin I (ACT1)                                                       | 1.30  | 801.77 | 1778.44 |
| PF3D7_1246300   | conserved Plasmodium protein, unknown function                       | -0.42 | 178.75 | 120.86  |
| PF3D7_1246400   | myosin A tail domain interacting protein (MTIP)                      | 1.88  | 79.73  | 264.42  |
| PF3D7_1246500   | conserved Plasmodium protein, unknown function                       | -0.09 | 10.73  | 9.11    |
| PF3D7_1246600   | pre-mRNA-splicing factor, putative                                   | -0.02 | 43.92  | 39.21   |
| PF3D7_1246700   | conserved Plasmodium protein, unknown function                       | 0.47  | 6.01   | 7.52    |
| PF3D7_1246800   | signal recognition particle receptor, beta subunit (SRPR-beta)       | 0.38  | 40.30  | 47.20   |
| PF3D7_1246900   | RAC-beta serine/threonine protein kinase (PKB)                       | 1.39  | 4.61   | 10.92   |
| PF3D7_1247000.1 | DNA replication origin binding protein, putative (DIA2)              | 0.64  | 6.17   | 8.68    |
| PF3D7_1247000.2 | DNA replication origin binding protein, putative (DIA2)              | 0.64  | 6.24   | 8.77    |
| PF3D7_1247100   | conserved Plasmodium protein, unknown function                       | -0.55 | 25.74  | 15.88   |
| PF3D7_1247200   | conserved Plasmodium protein, unknown function                       | -1.30 | 39.76  | 14.56   |
| PF3D7_1247300   | GPI mannosyltransferase 2, putative                                  | -0.90 | 35.59  | 17.14   |
| PF3D7_1247400   | FK506-binding protein (FKBP)-type peptidyl-prolyl isomerase (FKBP35) | 0.46  | 61.54  | 76.39   |
| PF3D7_1247500   | serine/threonine protein kinase, putative                            | 0.00  | 12.55  | 11.35   |
| PF3D7_1247600   | conserved Plasmodium protein, unknown function                       | 0.03  | 1.42   | 1.30    |
| PF3D7_1247700   | conserved Plasmodium protein, unknown function                       | 0.81  | 3.75   | 5.94    |
| PF3D7_1247800   | dipeptidyl aminopeptidase 2 (DPAP2)                                  | 1.27  | 7.07   | 15.43   |
| PF3D7_1247900   | nucleolar rRNA processing protein, putative                          | -1.01 | 98.29  | 43.90   |
| PF3D7_1248000   | conserved Plasmodium protein, unknown function                       | -0.26 | 6.59   | 4.97    |
| PF3D7_1248100   | methyltransferase, putative                                          | -0.78 | 53.73  | 28.27   |
| PF3D7_1248200   | RNA-binding protein, putative                                        | -0.38 | 89.01  | 61.89   |
| PF3D7_1248300   | conserved Plasmodium membrane protein, unknown function              | -0.01 | 12.34  | 11.07   |
| PF3D7_1248400   | conserved Plasmodium protein, unknown function                       | 1.85  | 1.72   | 5.66    |
| PF3D7_1248500   | bax inhibitor 1, putative                                            | 0.10  | 640.50 | 619.88  |
| PF3D7_1248600   | conserved Plasmodium protein, unknown function                       | -0.96 | 23.56  | 10.93   |
| PF3D7_1248700   | conserved Plasmodium protein, unknown function                       | 0.15  | 397.21 | 396.36  |
| PF3D7_1248800   | conserved Plasmodium protein, unknown function                       | 0.57  | 3.30   | 4.44    |
| PF3D7_1248900   | 26S protease regulatory subunit 8, putative (RPT6)                   | 0.45  | 147.79 | 182.15  |
| PF3D7_1249000   | conserved Plasmodium membrane protein, unknown function              | -1.82 | 3.84   | 0.97    |
| PF3D7_1249100   | conserved Plasmodium protein, unknown function                       | -0.28 | 122.33 | 90.87   |
| PF3D7_1249200   | conserved Plasmodium protein, unknown function                       | -0.69 | 1.86   | 1.02    |
| PF3D7_1249300   | protein phosphatase PPM4, putative (PPM4)                            | 0.05  | 43.89  | 41.00   |
| PF3D7_1249400   | conserved Plasmodium protein, unknown function                       | 1.30  | 19.34  | 43.07   |
| PF3D7_1249500   | cutA, putative                                                       | 0.61  | 9.57   | 13.19   |
| PF3D7_1249600   | leucine-rich repeat protein (LRR12)                                  | 0.66  | 3.82   | 5.45    |
| PF3D7_1249700   | conserved Plasmodium protein, unknown function                       | 2.01  | 0.67   | 2.47    |
| PF3D7_1249800   | THO complex subunit 2, putative (THO2)                               | -0.49 | 43.98  | 28.23   |
| PF3D7_1249900   | apicoplast dimethyladenosine synthase, putative                      | 0.02  | 53.16  | 48.60   |
| PF3D7_1250000   | rRNA-processing protein, putative                                    | 0.60  | 167.75 | 229.03  |
| PF3D7_1250100   | osmiophilic body protein (G377)                                      | 0.89  | 0.40   | 0.67    |
| PF3D7_1250200   | conserved Plasmodium membrane protein, unknown function              | -0.20 | 93.60  | 73.76   |
| PF3D7_1250300   | vacuolar protein sorting-associated protein 26, putative (VPS26)     | 0.61  | 42.77  | 58.94   |
| PF3D7_1250400   | conserved Plasmodium protein, unknown function                       | 0.35  | 2.43   | 2.79    |
| PF3D7_1250500   | AP-3 complex subunit sigma, putative                                 | 0.52  | 35.16  | 45.38   |
| PF3D7_1250600   | eukaryotic translation initiation factor 2b, subunit 2, putative     | -0.14 | 86.63  | 71.08   |
| PF3D7_1250700   | conserved Plasmodium protein, unknown function                       | -0.32 | 43.75  | 31.70   |
| PF3D7_1250800   | DNA repair protein rhp16, putative                                   | 0.56  | 26.37  | 35.15   |
| PF3D7_1250900   | conserved Plasmodium protein, unknown function                       | -0.25 | 10.83  | 8.23    |
| PF3D7_1251000   | conserved Plasmodium protein, unknown function                       | -0.29 | 2.64   | 1.93    |
| PF3D7_1251100   | conserved Plasmodium protein, unknown function                       | -0.39 | 121.35 | 83.53   |
| PF3D7_1251200   | coronin                                                              | 1.69  | 99.00  | 288.54  |
| PF3D7_1251300   | thymidylate kinase (TMK)                                             | 0.95  | 13.77  | 24.01   |
| PF3D7_1251400   | conserved Plasmodium protein, unknown function                       | -1.28 | 5.86   | 2.17    |
| PF3D7_1251500   | DEAD/DEAH box A TP-dependent RNA helicase, putative                  | -0.28 | 135.98 | 100.87  |
| PF3D7_1251600   | conserved Plasmodium protein, unknown function                       | -0.94 | 102.54 | 48.31   |
| PF3D7_1251700   | tryptophan--tRNA ligase, putative (aTrpRS)                           | -0.48 | 8.68   | 5.59    |
| PF3D7_1251800   | conserved Plasmodium protein, unknown function                       | -0.35 | 34.86  | 24.63   |
| PF3D7_1251900   | tRNA Valine                                                          | 1.77  | 0.00   | 0.63    |
| PF3D7_1252000   | tRNA Glutamic acid                                                   | -1.40 | 0.62   | 0.00    |
| PF3D7_1252100   | rhoptry neck protein 3 (RON3)                                        | -1.09 | 91.30  | 38.77   |
| PF3D7_1252200   | chitinase (CHT1)                                                     | 0.49  | 11.25  | 14.24   |
| PF3D7_1252300   | conserved Plasmodium protein, unknown function                       | -0.46 | 431.58 | 282.88  |
| PF3D7_1252400   | reticulocyte binding protein homologue 3, pseudogene (RH3)           | 1.10  | 7.95   | 15.37   |
| PF3D7_1252500   | Plasmodium exported protein, unknown function                        | 0.20  | 3.38   | 3.52    |
| PF3D7_1252600   | lysophospholipase, putative                                          | -1.30 | 132.31 | 48.38   |
| PF3D7_1252700   | Plasmodium exported protein (PHISTb), unknown function               | -0.36 | 77.30  | 54.23   |
| PF3D7_1252800   | Plasmodium exported protein (PHISTb), unknown function               | -1.41 | 70.45  | 23.92   |
| PF3D7_1252900   | Plasmodium exported protein, unknown function                        | -0.35 | 127.98 | 90.44   |
| PF3D7_1253000   | gametocyte erythrocyte cytosolic protein (GECO)                      | -0.31 | 809.20 | 589.39  |
| PF3D7_1253100   | Plasmodium exported protein (PHISTa), unknown function               | -1.85 | 163.10 | 40.72   |
| PF3D7_1253200   | Plasmodium exported protein, unknown function                        | -0.95 | 66.24  | 30.98   |
| PF3D7_1253300   | Plasmodium exported protein (PHISTa), unknown function, pseudogene   | 0.18  | 376.84 | 386.26  |
| PF3D7_1253400   | acyl-CoA synthetase (ACS3)                                           | 0.61  | 15.95  | 21.98   |
| PF3D7_1253500   | Plasmodium exported protein, unknown function                        | -1.40 | 2.30   | 0.76    |

|                 |                                                                                   |       |         |         |
|-----------------|-----------------------------------------------------------------------------------|-------|---------|---------|
| PF3D7_1253600   | rifin, pseudogene (RIF)                                                           | -1.40 | 0.05    | 0.00    |
| PF3D7_1253700   | rifin (RIF)                                                                       | -2.62 | 0.12    | 0.00    |
| PF3D7_1253800   | Plasmodium exported protein (PHISTa), unknown function                            | 4.36  | 4.27    | 79.70   |
| PF3D7_1253900   | Plasmodium exported protein (PHISTa), unknown function, pseudogene                | -0.23 | 0.08    | 0.06    |
| PF3D7_1254000   | rifin (RIF)                                                                       | -0.55 | 0.09    | 0.04    |
| PF3D7_1254100   | stevor                                                                            | 3.36  | 0.00    | 0.21    |
| PF3D7_1254200   | rifin (RIF)                                                                       | 0.48  | 0.17    | 0.22    |
| PF3D7_1254300   | stevor                                                                            | 1.77  | 0.00    | 0.05    |
| PF3D7_1254400   | rifin (RIF)                                                                       | -0.27 | 0.41    | 0.30    |
| PF3D7_1254500   | rifin (RIF)                                                                       | -0.23 | 0.27    | 0.20    |
| PF3D7_1254600   | stevor                                                                            | 0.19  | 0.10    | 0.10    |
| PF3D7_1254700   | rifin (RIF)                                                                       | 2.30  | 0.05    | 0.28    |
| PF3D7_1254800   | rifin (RIF)                                                                       | -0.55 | 0.21    | 0.12    |
| PF3D7_1254900   | Plasmodium exported protein, unknown function, fragment                           | 1.19  | 0.00    | 0.11    |
| PF3D7_1255000   | rifin (RIF)                                                                       | 2.06  | 0.04    | 0.22    |
| PF3D7_1255100   | rifin (RIF)                                                                       | 0.16  | 1.00    | 1.01    |
| PF3D7_1255200   | erythrocyte membrane protein 1, PfEMP1 (VAR)                                      | -0.79 | 5.21    | 2.72    |
| PF3D7_1300100   | erythrocyte membrane protein 1, PfEMP1 (VAR)                                      | 0.80  | 4.44    | 6.98    |
| PF3D7_1300200   | rifin (RIF)                                                                       | 1.08  | 7.49    | 14.32   |
| PF3D7_1300300   | erythrocyte membrane protein 1, PfEMP1 (VAR)                                      | -1.13 | 1.56    | 0.64    |
| PF3D7_1300400   | rifin (RIF)                                                                       | 1.46  | 0.46    | 1.16    |
| PF3D7_1300500   | rifin (RIF)                                                                       | 1.67  | 0.20    | 0.62    |
| PF3D7_1300600   | rifin (RIF)                                                                       | 2.58  | 0.76    | 4.17    |
| PF3D7_1300700   | rifin (RIF)                                                                       | 1.12  | 0.20    | 0.41    |
| PF3D7_1300800   | erythrocyte membrane protein 1-like (VAR-like)                                    | 1.41  | 0.05    | 0.16    |
| PF3D7_1300900   | stevor                                                                            | 3.89  | 0.00    | 0.30    |
| PF3D7_1301000   | rifin, pseudogene (RIF)                                                           | 2.06  | 0.04    | 0.21    |
| PF3D7_1301100   | Plasmodium exported protein (PHISTa), unknown function, pseudogene                | -2.13 | 0.11    | 0.00    |
| PF3D7_1301200   | glycophorin binding protein (GBPH2)                                               | 4.37  | 10.96   | 205.40  |
| PF3D7_1301300   | Plasmodium exported protein (PHISTa-like), unknown function, pseudogene           | -0.26 | 10.75   | 8.11    |
| PF3D7_1301400   | Plasmodium exported protein (hyp12), unknown function (HYP12)                     | -0.14 | 554.54  | 454.83  |
| PF3D7_1301500   | Plasmodium exported protein (PHISTa), unknown function                            | 1.51  | 2.10    | 5.44    |
| PF3D7_1301600   | erythrocyte binding antigen-140 (EBA140)                                          | 1.49  | 46.77   | 118.28  |
| PF3D7_1301700   | Plasmodium exported protein (hyp8), unknown function (GEXP07)                     | -0.33 | 1831.98 | 1316.86 |
| PF3D7_1301800   | surface-associated interspersed protein 13.1 (SURFIN 13.1), pseudogene (SURF13.1) | 0.78  | 12.09   | 18.78   |
| PF3D7_1301900   | Plasmodium exported protein, unknown function                                     | 0.32  | 3.24    | 3.65    |
| PF3D7_1302000   | EMP1-trafficking protein (PTP6)                                                   | -0.87 | 940.05  | 462.73  |
| PF3D7_1302100   | gamete antigen 27/25 (G27/25)                                                     | 2.92  | 66.82   | 455.60  |
| PF3D7_1302200   | early transcribed membrane protein 13 (ETRAMP13)                                  | 0.28  | 1.40    | 1.54    |
| PF3D7_1302300   | Plasmodium exported protein, unknown function                                     | -0.04 | 46.26   | 40.44   |
| PF3D7_1302400   | conserved Plasmodium membrane protein, unknown function                           | -0.86 | 1.27    | 0.61    |
| PF3D7_1302500   | conserved Plasmodium protein, unknown function                                    | -0.22 | 23.55   | 18.26   |
| PF3D7_1302600   | deoxyhypusine hydroxylase (DOHH)                                                  | -0.60 | 78.96   | 46.94   |
| PF3D7_1302700   | DEAD/DEAH box ATP-dependent RNA helicase, putative                                | -0.11 | 64.97   | 54.45   |
| PF3D7_1302800   | 40S ribosomal protein S7, putative                                                | -0.33 | 691.90  | 495.48  |
| PF3D7_1302900   | conserved Plasmodium protein, unknown function                                    | -0.27 | 6.02    | 4.49    |
| PF3D7_1303000   | conserved Plasmodium protein, unknown function                                    | 1.01  | 12.21   | 22.25   |
| PF3D7_1303100   | methyltransferase-like protein, putative                                          | 0.14  | 15.77   | 15.63   |
| PF3D7_1303200.1 | SNARE protein, putative (VAMP8)                                                   | -0.42 | 7.29    | 4.89    |
| PF3D7_1303200.2 | SNARE protein, putative (VAMP8)                                                   | -0.49 | 7.51    | 4.79    |
| PF3D7_1303300   | conserved Plasmodium protein, unknown function                                    | -1.70 | 16.31   | 4.52    |
| PF3D7_1303400   | conserved Plasmodium protein, unknown function                                    | -0.61 | 170.67  | 100.73  |
| PF3D7_1303500   | sodium/hydrogen exchanger, Na <sup>+</sup> , H <sup>+</sup> antiporter (NHE)      | -0.74 | 113.54  | 61.50   |
| PF3D7_1303600   | conserved Plasmodium protein, unknown function                                    | -0.94 | 20.12   | 9.42    |
| PF3D7_1303700   | conserved Plasmodium protein, unknown function                                    | 0.42  | 5.95    | 7.16    |
| PF3D7_1303800   | conserved Plasmodium protein, unknown function                                    | 0.62  | 4.94    | 6.86    |
| PF3D7_1303900   | conserved Plasmodium protein, unknown function                                    | 1.30  | 1.10    | 2.48    |
| PF3D7_1304000   | chromosome condensation protein, putative                                         | 0.37  | 15.89   | 18.57   |
| PF3D7_1304100   | DNA ligase I (LigI)                                                               | -0.19 | 17.86   | 14.14   |
| PF3D7_1304200.1 | CorA-like Mg <sup>2+</sup> transporter protein, putative                          | -0.68 | 9.95    | 5.60    |
| PF3D7_1304200.2 | CorA-like Mg <sup>2+</sup> transporter protein, putative                          | -0.69 | 9.68    | 5.40    |
| PF3D7_1304300   | conserved Plasmodium protein, unknown function                                    | -0.89 | 6.52    | 3.16    |
| PF3D7_1304400   | conserved Plasmodium protein, unknown function                                    | -0.28 | 33.51   | 24.96   |
| PF3D7_1304500   | small heat shock protein, putative                                                | 1.48  | 24.02   | 60.58   |
| PF3D7_1304600   | conserved Plasmodium protein, unknown function                                    | 0.50  | 2.56    | 3.26    |
| PF3D7_1304700   | cyclin (CYC4)                                                                     | 0.08  | 3.75    | 3.57    |
| PF3D7_1304800   | small nucleolar RNA snoR16                                                        | -0.57 | 4.94    | 2.93    |
| PF3D7_1304900   | DNA-directed RNA polymerase 2, putative                                           | -0.44 | 56.97   | 37.84   |
| PF3D7_1305000   | conserved Plasmodium protein, unknown function                                    | 0.07  | 16.34   | 15.45   |
| PF3D7_1305100   | conserved Plasmodium protein, unknown function                                    | 0.47  | 8.16    | 10.21   |
| PF3D7_1305200   | transcription factor with AP2 domain(s) (ApiAP2)                                  | 0.94  | 2.02    | 3.52    |
| PF3D7_1305300   | conserved Plasmodium protein, unknown function                                    | -0.99 | 54.84   | 24.99   |
| PF3D7_1305400   | AAR2 protein, putative                                                            | -1.15 | 32.60   | 13.23   |
| PF3D7_1305500   | mitogen-activated protein kinase phosphatase 1, putative (MKP1)                   | -0.60 | 4.26    | 2.53    |
| PF3D7_1305600   | membrane integral peptidase, M50 family, putative                                 | 0.50  | 5.77    | 7.40    |
| PF3D7_1305700   | conserved Plasmodium protein, unknown function                                    | 1.69  | 1.63    | 4.83    |
| PF3D7_1305800   | conserved Plasmodium protein, unknown function                                    | 0.93  | 0.13    | 0.25    |
| PF3D7_1305900   | conserved Plasmodium protein, unknown function                                    | 0.92  | 13.80   | 23.55   |
| PF3D7_1306000   | conserved Plasmodium protein, unknown function                                    | -0.53 | 3.74    | 2.34    |
| PF3D7_1306100   | conserved Plasmodium protein, unknown function                                    | 0.17  | 5.84    | 5.95    |
| PF3D7_1306200   | conserved Plasmodium protein, unknown function                                    | -1.25 | 15.48   | 5.87    |
| PF3D7_1306300   | SAM dependent methyltransferase, putative                                         | 0.69  | 1.62    | 2.36    |
| PF3D7_1306400   | 26S protease regulatory subunit 10B, putative (RPT4)                              | 0.25  | 248.12  | 266.93  |
| PF3D7_1306500   | MORN repeat protein, putative                                                     | 0.46  | 0.55    | 0.68    |
| PF3D7_1306600   | V-type proton ATPase subunit H, putative                                          | -1.62 | 40.74   | 11.99   |
| PF3D7_1306700   | conserved Plasmodium protein, unknown function                                    | 0.43  | 3.73    | 4.54    |
| PF3D7_1306800   | RED-like protein, putative                                                        | -1.03 | 29.42   | 12.96   |
| PF3D7_1306900   | U1 small nuclear ribonucleoprotein A, putative                                    | -0.55 | 68.73   | 42.24   |
| PF3D7_1307000   | exosome complex component RRP40, putative (RRP40)                                 | -0.38 | 53.81   | 37.32   |
| PF3D7_1307100   | U3 small nucleolar RNA-associated protein 6, putative                             | -0.82 | 57.49   | 29.36   |
| PF3D7_1307200   | DnaJ protein, putative                                                            | 0.10  | 37.47   | 36.27   |
| PF3D7_1307300   | DEAD box helicase, putative                                                       | -0.80 | 14.32   | 7.41    |
| PF3D7_1307400   | conserved Plasmodium protein, unknown function                                    | -0.13 | 1.33    | 1.09    |
| PF3D7_1307500   | conserved Plasmodium protein, unknown function                                    | -0.10 | 21.06   | 17.68   |
| PF3D7_1307600   | DNA-directed RNA polymerase alpha chain, putative                                 | 0.31  | 37.30   | 41.74   |
| PF3D7_1307700   | conserved Plasmodium protein, unknown function                                    | -0.89 | 49.73   | 24.25   |
| PF3D7_1307800   | fork head domain protein, putative                                                | -0.26 | 38.59   | 29.07   |
| PF3D7_1307900   | tripartite motif protein, putative                                                | -0.50 | 8.41    | 5.37    |



|               |                                                                                     |       |        |        |
|---------------|-------------------------------------------------------------------------------------|-------|--------|--------|
| PF3D7_1308000 | conserved Plasmodium membrane protein, unknown function                             | 0.40  | 21.55  | 25.57  |
| PF3D7_1308100 | CCAAT-binding transcription factor, putative                                        | 0.91  | 12.64  | 21.42  |
| PF3D7_1308200 | carbamoyl phosphate synthetase (cpsSII)                                             | -0.87 | 297.00 | 146.66 |
| PF3D7_1308300 | 40S ribosomal protein S27 (RPS27)                                                   | -0.60 | 965.79 | 576.49 |
| PF3D7_1308400 | conserved Plasmodium protein, unknown function                                      | -0.29 | 18.12  | 13.34  |
| PF3D7_1308500 | conserved Plasmodium protein, unknown function                                      | 0.51  | 5.29   | 6.78   |
| PF3D7_1308600 | conserved Plasmodium protein, unknown function                                      | -0.36 | 0.70   | 0.49   |
| PF3D7_1308700 | conserved Plasmodium protein, unknown function                                      | 0.45  | 10.73  | 13.21  |
| PF3D7_1308800 | tyrosine recombinase (INT)                                                          | 0.90  | 16.61  | 28.06  |
| PF3D7_1308900 | mRNA-decapping enzyme 2, putative (DCP2)                                            | -1.53 | 135.82 | 42.47  |
| PF3D7_1309000 | conserved Plasmodium protein, unknown function                                      | -0.97 | 105.17 | 48.59  |
| PF3D7_1309100 | 60S ribosomal protein L24, putative                                                 | 0.61  | 694.80 | 954.73 |
| PF3D7_1309120 | unspecified product                                                                 | 0.61  | 135.35 | 186.57 |
| PF3D7_1309200 | protein phosphatase PPM6, putative (PPM6)                                           | -0.34 | 58.30  | 41.65  |
| PF3D7_1309300 | U4/U6 small nuclear ribonucleoprotein PRP3, putative (PRPF3)                        | -0.78 | 129.95 | 68.09  |
| PF3D7_1309400 | HORMA domain protein, putative                                                      | 0.23  | 30.12  | 31.80  |
| PF3D7_1309500 | H/ACA ribonucleoprotein complex subunit 1, putative (GAR1)                          | -0.58 | 66.63  | 40.07  |
| PF3D7_1309600 | ribosomal RNA methyltransferase, putative                                           | -0.95 | 37.23  | 17.35  |
| PF3D7_1309700 | vacuolar protein sorting-associated protein 18, putative (VPS18)                    | -0.92 | 27.39  | 13.08  |
| PF3D7_1309800 | conserved Plasmodium protein, unknown function                                      | 1.09  | 7.66   | 14.73  |
| PF3D7_1309900 | conserved Plasmodium protein, unknown function                                      | 0.66  | 0.83   | 1.19   |
| PF3D7_1310000 | mitochondrial ATP synthase delta subunit, putative (OSCP)                           | -0.10 | 2.38   | 1.99   |
| PF3D7_1310100 | conserved Plasmodium protein, unknown function                                      | 0.14  | 0.97   | 0.97   |
| PF3D7_1310200 | conserved Plasmodium protein, unknown function                                      | 1.15  | 20.96  | 41.98  |
| PF3D7_1310300 | zinc finger protein, putative                                                       | -0.44 | 10.24  | 6.81   |
| PF3D7_1310400 | conserved Plasmodium protein, unknown function                                      | -0.57 | 43.63  | 26.46  |
| PF3D7_1310500 | conserved protein, unknown function                                                 | -0.78 | 42.70  | 22.40  |
| PF3D7_1310600 | ras-related protein Rab-5B (RAB5b)                                                  | 0.71  | 34.89  | 51.56  |
| PF3D7_1310700 | RNA-binding protein, putative                                                       | 2.40  | 127.29 | 608.32 |
| PF3D7_1310800 | conserved Plasmodium protein, unknown function                                      | -0.49 | 41.43  | 26.67  |
| PF3D7_1310900 | mitochondrial ribosomal protein S15 precursor, putative                             | 0.15  | 15.08  | 15.10  |
| PF3D7_1311000 | protein ISD11, putative (ISD11)                                                     | 0.70  | 13.24  | 19.45  |
| PF3D7_1311100 | meiosis-specific nuclear structural protein 1, putative                             | 0.65  | 5.93   | 8.39   |
| PF3D7_1311200 | alternative splicing regulator, putative                                            | -1.14 | 24.89  | 10.19  |
| PF3D7_1311300 | ATP synthase subunit gamma, mitochondrial                                           | 0.77  | 7.66   | 11.76  |
| PF3D7_1311400 | AP-1 complex subunit mu-1 (AP1M1)                                                   | -0.56 | 142.31 | 86.97  |
| PF3D7_1311500 | 26S protease regulatory subunit 7, putative (RPT1)                                  | 0.36  | 213.18 | 246.86 |
| PF3D7_1311600 | conserved Plasmodium protein, unknown function                                      | -1.11 | 74.03  | 30.88  |
| PF3D7_1311700 | cytochrome c2 precursor, putative                                                   | 0.52  | 64.59  | 83.53  |
| PF3D7_1311800 | M1-family alanyl aminopeptidase (M1AAP)                                             | -0.98 | 913.23 | 417.86 |
| PF3D7_1311900 | V-type proton ATPase catalytic subunit A (vapA)                                     | -0.63 | 297.93 | 173.77 |
| PF3D7_1312000 | malonyl CoA-acyl carrier protein transacylase precursor (MCAT)                      | 0.94  | 4.90   | 8.51   |
| PF3D7_1312100 | conserved Plasmodium protein, unknown function                                      | -0.32 | 7.27   | 5.25   |
| PF3D7_1312200 | conserved Plasmodium protein, unknown function                                      | -0.21 | 4.39   | 3.42   |
| PF3D7_1312300 | mitochondrial ribosomal protein S35 precursor, putative                             | 2.08  | 1.83   | 7.08   |
| PF3D7_1312400 | translation initiation factor IF-2, putative (IF2a)                                 | 1.26  | 2.24   | 4.87   |
| PF3D7_1312500 | conserved Plasmodium protein, unknown function                                      | 1.37  | 6.11   | 14.42  |
| PF3D7_1312600 | 2-oxoisovalerate dehydrogenase subunit alpha, mitochondrial, putative (BCKDHA)      | 1.06  | 26.12  | 49.13  |
| PF3D7_1312700 | probable protein, unknown function                                                  | 0.30  | 7.93   | 8.81   |
| PF3D7_1312800 | conserved Plasmodium protein, unknown function                                      | 0.86  | 24.60  | 40.15  |
| PF3D7_1312900 | eukaryotic translation initiation factor 4 gamma (EIF4G)                            | -0.18 | 127.59 | 101.91 |
| PF3D7_1313000 | ubiquitin-like protein nedd8 homologue, putative (Nedd8)                            | 0.97  | 9.99   | 17.75  |
| PF3D7_1313100 | conserved Plasmodium protein, unknown function                                      | 1.22  | 0.20   | 0.42   |
| PF3D7_1313200 | methionyl-tRNA formyltransferase, putative (MTFMT)                                  | -1.14 | 3.59   | 1.46   |
| PF3D7_1313300 | peptidyl-prolyl cis-trans isomerase, putative                                       | 1.91  | 2.62   | 8.93   |
| PF3D7_1313400 | DEAD box helicase, putative                                                         | -0.56 | 8.15   | 4.97   |
| PF3D7_1313500 | conserved Plasmodium membrane protein, unknown function                             | -0.14 | 2.93   | 2.39   |
| PF3D7_1313600 | conserved Plasmodium protein, unknown function                                      | -0.59 | 6.16   | 3.69   |
| PF3D7_1313700 | septum formation protein MAF homologue, putative                                    | -0.36 | 6.14   | 4.32   |
| PF3D7_1313800 | conserved Plasmodium membrane protein, unknown function                             | -0.81 | 45.01  | 23.21  |
| PF3D7_1313900 | conserved Plasmodium protein, unknown function                                      | -1.75 | 17.07  | 4.58   |
| PF3D7_1314000 | conserved Plasmodium protein, unknown function                                      | 0.03  | 2.33   | 2.15   |
| PF3D7_1314100 | conserved Plasmodium protein, unknown function                                      | -1.01 | 14.95  | 6.71   |
| PF3D7_1314200 | telomerase reverse transcriptase (TERT)                                             | 0.26  | 2.18   | 2.36   |
| PF3D7_1314300 | conserved Plasmodium protein, unknown function                                      | -0.02 | 6.10   | 5.41   |
| PF3D7_1314400 | conserved Plasmodium protein, unknown function                                      | -0.48 | 4.19   | 2.68   |
| PF3D7_1314500 | cop-coated vesicle membrane protein p24 precursor, putative                         | -0.07 | 36.00  | 30.86  |
| PF3D7_1314600 | lipoyl-protein ligase 1 (LipL1)                                                     | -0.67 | 11.34  | 6.40   |
| PF3D7_1314700 | conserved Plasmodium protein, unknown function                                      | 1.59  | 12.89  | 35.02  |
| PF3D7_1314800 | ubiquitin-like protein, putative                                                    | 0.39  | 1.68   | 1.98   |
| PF3D7_1314900 | general transcription factor IIH subunit 2 (P44)                                    | -0.31 | 103.64 | 75.24  |
| PF3D7_1315000 | conserved Plasmodium protein, unknown function                                      | -1.82 | 64.94  | 16.60  |
| PF3D7_1315100 | serine/threonine protein kinase (PK9)                                               | -0.77 | 3.69   | 1.94   |
| PF3D7_1315200 | conserved Plasmodium protein, unknown function                                      | 0.06  | 3.16   | 2.96   |
| PF3D7_1315300 | conserved Plasmodium protein, unknown function                                      | -0.93 | 15.96  | 7.53   |
| PF3D7_1315400 | zinc finger (CCCH type) protein, putative                                           | -0.43 | 249.81 | 167.81 |
| PF3D7_1315500 | conserved Plasmodium protein, unknown function                                      | -0.54 | 48.49  | 30.04  |
| PF3D7_1315600 | CDP-diacylglycerol--inositol 3-phosphatidyltransferase (PIS)                        | -0.48 | 32.04  | 20.69  |
| PF3D7_1315700 | tRNA (adenine(58)-N(1))-methyltransferase catalytic subunit TRM61, putative (GCD14) | -0.63 | 62.02  | 36.11  |
| PF3D7_1315800 | transcription factor MYB1 (MYB1)                                                    | -0.68 | 56.40  | 31.74  |
| PF3D7_1315900 | exportin-1, putative                                                                | -0.67 | 83.37  | 47.12  |
| PF3D7_1316000 | protein kinase, putative                                                            | 1.49  | 0.52   | 1.35   |
| PF3D7_1316100 | inositol polyphosphate kinase, putative (IPK2)                                      | -0.28 | 32.76  | 24.35  |
| PF3D7_1316200 | ADP-ribosylation factor, putative                                                   | 0.13  | 15.17  | 14.94  |
| PF3D7_1316300 | conserved Plasmodium protein, unknown function                                      | 0.19  | 0.71   | 0.73   |
| PF3D7_1316400 | conserved Plasmodium protein, unknown function                                      | 0.46  | 1.08   | 1.34   |
| PF3D7_1316500 | pre-mRNA-processing factor 40, putative (PRP40)                                     | -0.01 | 48.99  | 43.74  |
| PF3D7_1316600 | choline-phosphate cytidylyltransferase (CCT)                                        | 0.42  | 50.17  | 60.51  |
| PF3D7_1316700 | conserved Plasmodium protein, unknown function                                      | -0.75 | 3.48   | 1.86   |
| PF3D7_1316800 | protein transport protein SEC20, putative (SEC20)                                   | -0.02 | 47.19  | 42.05  |
| PF3D7_1316900 | conserved Plasmodium protein, unknown function                                      | -1.32 | 114.89 | 41.57  |
| PF3D7_1317000 | U4/U6.U5 tri-snRNP-associated protein 2, putative (USP39)                           | -0.33 | 79.09  | 56.62  |
| PF3D7_1317100 | DNA replication licensing factor MCM4 (MCM4)                                        | 0.44  | 65.13  | 79.91  |
| PF3D7_1317200 | transcription factor with AP2 domain(s) (ApiAP2)                                    | -0.20 | 6.77   | 5.33   |
| PF3D7_1317300 | conserved Plasmodium protein, unknown function                                      | 0.50  | 37.16  | 47.40  |
| PF3D7_1317400 | conserved Plasmodium protein, unknown function                                      | 0.19  | 18.59  | 19.15  |
| PF3D7_1317500 | conserved Plasmodium protein, unknown function                                      | 2.01  | 1.00   | 3.84   |
| PF3D7_1317600 | conserved Plasmodium protein, unknown function                                      | -0.11 | 10.22  | 8.55   |

|                 |                                                                                                   |       |         |         |
|-----------------|---------------------------------------------------------------------------------------------------|-------|---------|---------|
| PF3D7_1317700   | conserved Plasmodium protein, unknown function                                                    | -1.14 | 33.41   | 13.65   |
| PF3D7_1317800   | 40S ribosomal protein S19 (RPS19)                                                                 | -0.12 | 1863.21 | 1548.27 |
| PF3D7_1317900   | small ribosomal subunit nuclear export protein, putative                                          | -0.93 | 40.34   | 19.09   |
| PF3D7_1318000   | conserved Plasmodium membrane protein, unknown function                                           | -0.75 | 58.96   | 31.70   |
| PF3D7_1318100   | ferredoxin, putative                                                                              | 1.02  | 9.80    | 17.95   |
| PF3D7_1318200   | glycerol-3-phosphate 1-O-acyltransferase, putative (G3PAT)                                        | 1.28  | 0.99    | 2.18    |
| PF3D7_1318300   | conserved Plasmodium protein, unknown function                                                    | -0.15 | 11.80   | 9.58    |
| PF3D7_1318400   | chromosome segregation protein, putative                                                          | 0.53  | 21.19   | 27.65   |
| PF3D7_1318500   | conserved Plasmodium protein, unknown function                                                    | -0.48 | 0.85    | 0.54    |
| PF3D7_1318600   | conserved Plasmodium protein, unknown function                                                    | 0.72  | 2.34    | 3.48    |
| PF3D7_1318700   | conserved Plasmodium protein, unknown function                                                    | 1.20  | 14.42   | 29.88   |
| PF3D7_1318800   | translocation protein SEC63 (SEC63)                                                               | -0.57 | 179.52  | 108.83  |
| PF3D7_1318900   | conserved Plasmodium protein, unknown function                                                    | 0.21  | 4.02    | 4.19    |
| PF3D7_1319000   | conserved Plasmodium protein, unknown function                                                    | 1.40  | 3.39    | 8.08    |
| PF3D7_1319100   | conserved protein, unknown function                                                               | -1.19 | 85.61   | 33.91   |
| PF3D7_1319200   | conserved Plasmodium protein, unknown function                                                    | -0.07 | 6.06    | 5.22    |
| PF3D7_1319300   | N2,N2-dimethylguanosine tRNA methyltransferase, putative                                          | -1.15 | 141.61  | 57.39   |
| PF3D7_1319400   | conserved Plasmodium protein, unknown function                                                    | 0.51  | 41.39   | 53.05   |
| PF3D7_1319500   | conserved Plasmodium protein, unknown function                                                    | 0.54  | -2.09   | -2.76   |
| PF3D7_1319600   | conserved Plasmodium protein, unknown function                                                    | 0.48  | 3.33    | 4.19    |
| PF3D7_1319700   | protein phosphatase PP2A regulatory subunit A, putative                                           | 0.16  | 3.86    | 3.89    |
| PF3D7_1319800   | probable protein, unknown function                                                                | 1.68  | 4.19    | 12.20   |
| PF3D7_1319900   | conserved Plasmodium protein, unknown function                                                    | 0.09  | 0.68    | 0.65    |
| PF3D7_1320000   | rhoGTPase protein 2, putative (PRP2)                                                              | -1.57 | 154.67  | 46.95   |
| PF3D7_1320100   | ATP-dependent Clp protease adaptor protein ClpS, putative                                         | 0.67  | 9.32    | 13.40   |
| PF3D7_1320200   | TBC domain protein, putative                                                                      | 0.63  | 4.95    | 6.89    |
| PF3D7_1320300   | conserved Plasmodium protein, unknown function                                                    | -0.34 | 6.17    | 4.39    |
| PF3D7_1320400   | type I signal peptidase (SPB)                                                                     | -0.05 | 6.99    | 6.08    |
| PF3D7_1320500   | SNARE protein, putative (SNAP23)                                                                  | 0.12  | 20.22   | 19.84   |
| PF3D7_1320600   | ras-related protein Rab-1A (RAB11a)                                                               | 0.46  | 112.27  | 139.03  |
| PF3D7_1320700   | conserved Plasmodium protein, unknown function                                                    | -0.06 | 17.49   | 15.18   |
| PF3D7_1320800   | dihydrolipoyllysine-residue succinyltransferase component of 2-oxoglutarate dehydrogenase complex | 0.91  | 14.21   | 24.10   |
| PF3D7_1320900   | RNA-binding protein, putative                                                                     | 0.95  | 22.81   | 39.78   |
| PF3D7_1321000   | conserved Plasmodium protein, unknown function                                                    | -1.71 | 0.44    | 0.11    |
| PF3D7_1321100   | conserved Plasmodium protein, unknown function                                                    | -0.10 | 24.90   | 21.00   |
| PF3D7_1321200   | conserved protein, unknown function                                                               | 0.06  | 15.69   | 14.77   |
| PF3D7_1321300   | conserved Plasmodium membrane protein, unknown function                                           | -1.60 | 23.14   | 6.86    |
| PF3D7_1321400   | palmitoyltransferase, putative (DHH8)                                                             | -0.73 | 19.38   | 10.51   |
| PF3D7_1321500.1 | 3',5'-cyclic nucleotide phosphodiesterase, putative (PDEbeta)                                     | -0.05 | 30.62   | 26.65   |
| PF3D7_1321500.2 | 3',5'-cyclic nucleotide phosphodiesterase, putative (PDEbeta)                                     | -0.05 | 30.63   | 26.62   |
| PF3D7_1321600   | phosphodiesterase gamma, putative (PDEgamma)                                                      | 1.13  | 1.92    | 3.79    |
| PF3D7_1321700   | splicing factor 1 (SF1)                                                                           | 0.50  | 203.58  | 259.68  |
| PF3D7_1321800   | protein transport protein SFT2, putative                                                          | -0.58 | 155.85  | 94.07   |
| PF3D7_1321900   | conserved Plasmodium protein, unknown function                                                    | -0.70 | 130.73  | 72.52   |
| PF3D7_1322000   | adenosine-diphosphatase, putative                                                                 | -0.10 | 20.14   | 16.98   |
| PF3D7_1322100   | variant-silencing SET protein (SETvs)                                                             | -0.45 | 74.31   | 49.12   |
| PF3D7_1322200   | conserved Plasmodium protein, unknown function                                                    | 0.15  | 16.30   | 16.34   |
| PF3D7_1322300   | translation initiation factor EIF-2B subunit related                                              | 0.54  | 3.47    | 4.57    |
| PF3D7_1322400   | conserved Plasmodium protein, unknown function                                                    | 0.66  | 3.40    | 4.84    |
| PF3D7_1322500   | palmitoyltransferase, putative (DHH5)                                                             | 0.17  | 24.30   | 24.58   |
| PF3D7_1322600   | conserved Plasmodium protein, unknown function                                                    | 0.57  | 5.04    | 6.76    |
| PF3D7_1322700   | conserved Plasmodium protein, unknown function                                                    | 1.25  | 1.69    | 3.63    |
| PF3D7_1322800   | conserved Plasmodium protein, unknown function                                                    | 1.08  | 1.22    | 2.38    |
| PF3D7_1322900   | conserved Plasmodium protein, unknown function                                                    | 0.67  | 3.14    | 4.51    |
| PF3D7_1323000   | beta-hydroxyacyl-ACP dehydratase (FabZ)                                                           | 0.15  | 20.43   | 20.40   |
| PF3D7_1323100   | 60S ribosomal protein L6, putative                                                                | 0.06  | 894.74  | 838.65  |
| PF3D7_1323200   | V-type proton ATPase subunit G, putative                                                          | -0.15 | 113.14  | 91.93   |
| PF3D7_1323300   | acetyltransferase, GNAT family, putative                                                          | -0.09 | 6.18    | 5.22    |
| PF3D7_1323400   | 60S ribosomal protein L23 (RPL23)                                                                 | -0.29 | 1527.94 | 1127.27 |
| PF3D7_1323500   | plasmepsin V (PMV)                                                                                | -1.33 | 118.16  | 42.48   |
| PF3D7_1323600   | conserved Plasmodium protein, unknown function                                                    | 0.69  | 10.09   | 14.66   |
| PF3D7_1323700   | glideosome associated protein with multiple membrane spans 1 (GAPM1)                              | 0.23  | 256.93  | 272.22  |
| PF3D7_1323800   | vacuolar protein sorting-associated protein 52, putative (VPS52)                                  | -1.12 | 20.15   | 8.36    |
| PF3D7_1323900   | protein BCPI, putative                                                                            | -0.51 | 90.11   | 57.24   |
| PF3D7_1324000   | conserved Plasmodium protein, unknown function                                                    | -1.01 | 35.97   | 16.08   |
| PF3D7_1324100   | conserved Plasmodium membrane protein, unknown function                                           | 0.09  | 14.19   | 13.67   |
| PF3D7_1324200   | micro-fibrillar-associated protein, putative                                                      | 0.46  | 110.32  | 136.45  |
| PF3D7_1324300   | conserved Plasmodium membrane protein, unknown function                                           | 0.20  | 4.02    | 4.16    |
| PF3D7_1324400   | MSF1-like protein, putative                                                                       | -1.27 | 78.85   | 29.37   |
| PF3D7_1324500   | DEAD box helicase, putative                                                                       | 0.66  | 6.22    | 8.85    |
| PF3D7_1324600   | conserved Plasmodium protein, unknown function                                                    | 0.67  | 2.70    | 3.87    |
| PF3D7_1324700   | SNARE protein, putative (YKT6.2)                                                                  | -0.10 | 93.00   | 78.46   |
| PF3D7_1324800   | dihydrofolate synthase/folypolyglutamate synthase (DHFS-FPGS)                                     | 0.69  | 21.24   | 31.00   |
| PF3D7_1324900   | L-lactate dehydrogenase (LDH)                                                                     | -0.22 | 2227.95 | 1723.06 |
| PF3D7_1325000   | U6 snRNA-associated Sm-like protein LSM6, putative (LSM6)                                         | -0.20 | 109.03  | 85.53   |
| PF3D7_1325100   | phosphoribosylpyrophosphate synthetase                                                            | 0.16  | 444.11  | 448.42  |
| PF3D7_1325200   | oxidoreductase, putative                                                                          | 0.70  | 6.80    | 9.97    |
| PF3D7_1325300   | conserved Plasmodium protein, unknown function                                                    | -2.62 | 1.88    | 0.23    |
| PF3D7_1325400   | conserved Plasmodium protein, unknown function                                                    | 0.13  | 12.32   | 12.15   |
| PF3D7_1325500   | conserved Plasmodium protein, unknown function                                                    | 0.93  | 2.16    | 3.72    |
| PF3D7_1325600   | mitochondrial fission 1 protein, putative (FIS1)                                                  | 0.15  | 19.61   | 19.62   |
| PF3D7_1325700   | conserved Plasmodium protein, unknown function                                                    | 0.43  | 4.57    | 5.57    |
| PF3D7_1325800   | conserved Plasmodium protein, unknown function                                                    | -0.07 | 3.18    | 2.73    |
| PF3D7_1325900   | conserved Plasmodium protein, unknown function                                                    | -0.02 | 8.99    | 8.02    |
| PF3D7_1326000   | conserved Plasmodium protein, unknown function                                                    | -0.26 | 45.57   | 34.22   |
| PF3D7_1326100   | WD repeat-containing protein, putative                                                            | -0.85 | 27.19   | 13.62   |
| PF3D7_1326200   | conserved Plasmodium protein, unknown function                                                    | -1.04 | 8.53    | 3.72    |
| PF3D7_1326300   | RNA-binding protein, putative                                                                     | 0.44  | 118.66  | 144.83  |
| PF3D7_1326400   | translation initiation factor EIF-2B gamma subunit, putative                                      | -0.92 | 54.74   | 26.16   |
| PF3D7_1326500   | conserved Plasmodium protein, unknown function                                                    | 0.61  | 2.39    | 3.29    |
| PF3D7_1326600   | conserved Plasmodium protein, unknown function                                                    | 0.17  | 5.19    | 5.27    |
| PF3D7_1326700   | conserved Plasmodium protein, unknown function                                                    | -1.56 | 37.40   | 11.44   |
| PF3D7_1326800   | syntaxin, Qa-SNARE family (SYN18)                                                                 | -0.95 | 10.39   | 4.85    |
| PF3D7_1326900   | conserved Plasmodium membrane protein, unknown function                                           | -0.69 | 9.30    | 5.19    |
| PF3D7_1327000   | conserved Plasmodium protein, unknown function                                                    | -0.76 | 17.88   | 9.55    |
| PF3D7_1327100   | conserved Plasmodium protein, unknown function                                                    | 0.41  | 0.76    | 0.91    |
| PF3D7_1327200   | ribonuclease P protein subunit RPR2, putative (RPR2)                                              | -1.13 | 59.23   | 24.37   |
| PF3D7_1327300   | conserved Plasmodium protein, unknown function                                                    | 2.52  | 20.78   | 107.55  |

|                 |                                                                    |       |         |         |
|-----------------|--------------------------------------------------------------------|-------|---------|---------|
| PF3D7_1327400   | conserved Plasmodium protein, unknown function                     | -0.72 | 32.65   | 17.91   |
| PF3D7_1327500   | conserved Plasmodium protein, unknown function                     | -0.90 | 4.43    | 2.13    |
| PF3D7_1327600   | nicotinate-nucleotide adenyltransferase (NMNAT)                    | -0.49 | 22.40   | 14.42   |
| PF3D7_1327700   | regulator of nonsense transcripts 3B, putative (UPF3B)             | -0.72 | 43.43   | 23.85   |
| PF3D7_1327800   | ribose-phosphate pyrophosphokinase, putative                       | -0.31 | 70.69   | 51.31   |
| PF3D7_1327900   | conserved Plasmodium protein, unknown function                     | -1.40 | 0.11    | 0.00    |
| PF3D7_1328000   | conserved Plasmodium protein, unknown function                     | 0.05  | 6.70    | 6.26    |
| PF3D7_1328100   | proteasome subunit beta type-7, putative                           | 0.58  | 166.22  | 224.55  |
| PF3D7_1328200   | conserved Plasmodium protein, unknown function                     | 0.48  | 6.63    | 8.36    |
| PF3D7_1328300   | conserved Plasmodium protein, unknown function                     | 0.29  | 104.96  | 115.63  |
| PF3D7_1328400   | conserved Plasmodium protein, unknown function                     | -0.24 | 4.66    | 3.57    |
| PF3D7_1328500   | alpha/beta-hydrolase, putative                                     | -0.66 | 59.48   | 33.85   |
| PF3D7_1328600   | conserved Plasmodium protein, unknown function                     | 0.78  | 1.78    | 2.78    |
| PF3D7_1328700   | Plasmodium RNA of unknown function RUF1                            | -0.10 | 8.68    | 7.26    |
| PF3D7_1328800   | transcriptional regulatory protein sir2a (SIR2A)                   | 0.56  | 55.73   | 73.91   |
| PF3D7_1328900   | conserved Plasmodium protein, unknown function                     | -0.88 | 9.83    | 4.80    |
| PF3D7_1329000   | DNA-directed RNA polymerase 3 largest subunit                      | -0.25 | 57.61   | 43.66   |
| PF3D7_1329100   | myosin C (MyoC)                                                    | 0.59  | 33.49   | 45.45   |
| PF3D7_1329200   | conserved Plasmodium protein, unknown function                     | -0.04 | 13.00   | 11.44   |
| PF3D7_1329300   | chromatin assembly factor 1 subunit, putative                      | 0.33  | 29.44   | 33.37   |
| PF3D7_1329400   | AMP deaminase, putative                                            | 0.46  | 21.92   | 27.16   |
| PF3D7_1329500   | conserved Plasmodium protein, unknown function                     | -1.19 | 746.90  | 294.81  |
| PF3D7_1329600   | conserved Plasmodium protein, unknown function                     | -1.34 | 92.94   | 33.17   |
| PF3D7_1329700   | apicoplast calcium binding protein 1 (ACBP1)                       | 1.23  | 4.12    | 8.71    |
| PF3D7_1329800   | conserved Plasmodium protein, unknown function                     | 0.42  | 1.32    | 1.59    |
| PF3D7_1329900   | conserved Plasmodium protein, unknown function                     | 0.00  | 1.12    | 1.01    |
| PF3D7_1330000.1 | thioredoxin, putative                                              | -0.49 | 31.56   | 20.29   |
| PF3D7_1330000.2 | thioredoxin, putative                                              | -0.47 | 31.73   | 20.64   |
| PF3D7_1330100   | conserved Plasmodium protein, unknown function                     | -0.07 | 15.37   | 13.22   |
| PF3D7_1330200   | conserved Plasmodium protein, unknown function                     | 0.16  | 19.51   | 19.72   |
| PF3D7_1330300   | DnaJ protein, putative                                             | -0.07 | 15.74   | 13.48   |
| PF3D7_1330400.1 | ER lumen protein retaining receptor 1, putative                    | -0.68 | 234.00  | 131.64  |
| PF3D7_1330400.2 | ER lumen protein retaining receptor 1, putative                    | -0.78 | 224.99  | 117.88  |
| PF3D7_1330500   | conserved Plasmodium protein, unknown function                     | 1.00  | 12.50   | 22.60   |
| PF3D7_1330600   | elongation factor Tu, putative                                     | 1.30  | 14.64   | 32.44   |
| PF3D7_1330700   | GPI transamidase subunit PIG-U, putative                           | 0.46  | 4.09    | 5.08    |
| PF3D7_1330800   | conserved Plasmodium protein, unknown function                     | 0.82  | 363.84  | 577.90  |
| PF3D7_1330900   | small nucleolar RNA snoR17                                         | 0.19  | 0.00    | 0.00    |
| PF3D7_1331000   | protein kinase, putative                                           | 0.26  | 5.94    | 6.41    |
| PF3D7_1331100   | DEAD box helicase, putative                                        | -0.43 | 50.76   | 34.10   |
| PF3D7_1331200   | conserved Plasmodium protein, unknown function                     | -0.90 | 57.68   | 27.79   |
| PF3D7_1331300   | signal peptidase 21 kDa subunit (SP21)                             | 0.98  | 30.71   | 54.69   |
| PF3D7_1331400   | CPW-WPC family protein                                             | 1.81  | 3.80    | 12.01   |
| PF3D7_1331500   | conserved Plasmodium protein, unknown function                     | 0.98  | 10.35   | 18.37   |
| PF3D7_1331600   | protein tyrosine phosphatase-like protein, putative (PTPLA)        | 0.33  | 27.06   | 30.67   |
| PF3D7_1331700   | glutamine--tRNA ligase, putative                                   | -0.80 | 155.09  | 80.14   |
| PF3D7_1331800   | 60S ribosomal protein L23, putative                                | -0.22 | 1469.10 | 1135.60 |
| PF3D7_1331900   | small nucleolar RNA snoR18                                         | 0.07  | 586.87  | 556.56  |
| PF3D7_1332000   | syntaxin, Qa-SNARE family (SYN5)                                   | 0.09  | 67.83   | 65.03   |
| PF3D7_1332100   | conserved Plasmodium membrane protein, unknown function            | -0.10 | 7.58    | 6.37    |
| PF3D7_1332200   | conserved Plasmodium protein, unknown function                     | 1.39  | 52.33   | 124.03  |
| PF3D7_1332300   | trafficking protein particle complex subunit 2, putative (TRAPPC2) | 0.15  | 28.77   | 28.79   |
| PF3D7_1332400   | nucleotidyltransferase, putative                                   | -1.07 | 52.01   | 22.41   |
| PF3D7_1332500   | SAM-dependent RNA methyltransferase, putative                      | -0.01 | 182.03  | 162.75  |
| PF3D7_1332600   | apurinic/aprimidinic endonuclease Apn1, putative (APN1)            | 0.39  | 20.96   | 24.74   |
| PF3D7_1332700   | DEAD/DEAH box A ATP-dependent RNA helicase, putative               | -0.37 | 135.23  | 94.73   |
| PF3D7_1332800   | translation initiation factor 6, putative                          | -0.17 | 134.61  | 108.19  |
| PF3D7_1332900   | isoleucine--tRNA ligase, putative                                  | -0.65 | 158.65  | 91.20   |
| PF3D7_1333000   | 20 kDa chaperonin (CPN20)                                          | 0.01  | 62.50   | 56.79   |
| PF3D7_1333100   | conserved Plasmodium protein, unknown function                     | 1.30  | 0.38    | 0.85    |
| PF3D7_1333200   | ubiquitin-activating enzyme (UBA1)                                 | -0.49 | 12.35   | 7.95    |
| PF3D7_1333300   | transmembrane protein Tmp21 homologue, putative                    | -0.70 | 94.35   | 52.32   |
| PF3D7_1333400   | conserved protein, unknown function                                | -0.12 | 127.40  | 106.03  |
| PF3D7_1333500   | conserved Plasmodium protein, unknown function                     | 0.48  | 5.38    | 6.78    |
| PF3D7_1333600   | U3 small nucleolar RNA-associated protein 4, putative (UTP4)       | -0.40 | 64.04   | 43.76   |
| PF3D7_1333700   | histone H3-like centromeric protein CSE4 (CenH3)                   | 0.46  | 74.45   | 92.70   |
| PF3D7_1333800   | conserved Plasmodium protein, unknown function                     | 0.31  | 60.69   | 68.08   |
| PF3D7_1333900   | conserved Plasmodium protein, unknown function                     | -0.04 | 3.24    | 2.83    |
| PF3D7_1334000   | conserved Plasmodium protein, unknown function                     | 0.35  | 4.34    | 4.97    |
| PF3D7_1334100   | conserved Plasmodium protein, unknown function                     | 0.39  | 10.21   | 12.09   |
| PF3D7_1334200   | chaperone binding protein, putative                                | -0.64 | 83.67   | 48.39   |
| PF3D7_1334300   | MSP7-like protein (MSRP5)                                          | 2.36  | 8.47    | 39.18   |
| PF3D7_1334400   | MSP7-like protein (MSRP4)                                          | 0.75  | 3.03    | 4.63    |
| PF3D7_1334500   | MSP7-like protein (MSRP6)                                          | 0.68  | 6.07    | 8.79    |
| PF3D7_1334600   | MSP7-like protein (MSRP3)                                          | -0.06 | 15.71   | 13.61   |
| PF3D7_1334700   | MSP7-like protein (MSRP7)                                          | 0.13  | 310.17  | 306.35  |
| PF3D7_1334800   | MSP7-like protein (MSRP2)                                          | 0.02  | 31.30   | 28.72   |
| PF3D7_1334900   | MSP7-like protein, fragment, pseudogene                            | -0.49 | 22.72   | 14.54   |
| PF3D7_1335000   | MSP7-like protein (MSRP1)                                          | 0.58  | 2.76    | 3.73    |
| PF3D7_1335100   | merozoite surface protein 7 (MSP7)                                 | 0.80  | 342.89  | 538.74  |
| PF3D7_1335200   | reticulocyte binding protein homologue 6, pseudogene (RH6)         | 2.02  | 0.23    | 0.85    |
| PF3D7_1335300   | reticulocyte binding protein 2 homologue b (RH2b)                  | 1.26  | 22.03   | 47.71   |
| PF3D7_1335400   | reticulocyte binding protein 2 homologue a (RH2a)                  | 1.76  | 32.50   | 99.32   |
| PF3D7_1335500   | conserved Plasmodium protein, unknown function                     | 1.55  | 0.41    | 1.10    |
| PF3D7_1335600   | conserved Plasmodium protein, unknown function                     | -1.44 | 16.27   | 5.40    |
| PF3D7_1335700   | conserved Plasmodium protein, unknown function                     | -0.21 | 9.81    | 7.67    |
| PF3D7_1335800   | conserved Plasmodium protein, unknown function                     | 0.16  | 10.01   | 10.10   |
| PF3D7_1335900   | thrombospondin-related anonymous protein (TRAP)                    | 0.90  | 2.80    | 4.74    |
| PF3D7_1336000   | conserved Plasmodium protein, unknown function                     | -1.83 | 55.94   | 14.22   |
| PF3D7_1336100   | conserved Plasmodium protein, unknown function                     | 0.65  | 4.59    | 6.54    |
| PF3D7_1336200   | conserved Plasmodium protein, unknown function                     | 0.94  | 15.01   | 25.97   |
| PF3D7_1336300   | conserved Plasmodium membrane protein, unknown function            | -0.30 | 0.46    | 0.33    |
| PF3D7_1336400   | RanBPM and CLTH-like protein, putative                             | 0.12  | 10.82   | 10.63   |
| PF3D7_1336500   | small nucleolar RNA snoR19                                         | 0.64  | 4.11    | 5.88    |
| PF3D7_1336600   | conserved Plasmodium protein, unknown function                     | 0.62  | 10.55   | 14.69   |
| PF3D7_1336700   | conserved Plasmodium protein, unknown function                     | 0.11  | 377.79  | 368.00  |
| PF3D7_1336800   | nuclear movement protein, putative (NUDC)                          | -0.23 | 101.62  | 78.18   |
| PF3D7_1336900   | tryptophan--tRNA ligase (WRS)                                      | -0.37 | 46.46   | 32.45   |

|               |                                                              |       |         |         |
|---------------|--------------------------------------------------------------|-------|---------|---------|
| PF3D7_1337000 | endopeptidase, putative                                      | -0.10 | 3.91    | 3.29    |
| PF3D7_1337100 | protein kinase 6 (PK6)                                       | 1.15  | 4.22    | 8.50    |
| PF3D7_1337200 | 1-deoxy-D-xylulose 5-phosphate synthase (DXS)                | -0.39 | 18.43   | 12.71   |
| PF3D7_1337300 | exoribonuclease, putative                                    | -0.88 | 54.53   | 26.75   |
| PF3D7_1337400 | conserved Plasmodium protein, unknown function               | -0.66 | 80.83   | 46.13   |
| PF3D7_1337500 | conserved Plasmodium protein, unknown function               | -0.93 | 109.05  | 51.82   |
| PF3D7_1337600 | tRNA Serine                                                  | 0.19  | 0.00    | 0.00    |
| PF3D7_1337700 | conserved Plasmodium protein, unknown function               | -0.09 | 15.93   | 13.51   |
| PF3D7_1337800 | calcium-dependent protein kinase 5 (CDPK5)                   | 0.68  | 9.26    | 13.41   |
| PF3D7_1337900 | conserved Plasmodium protein, unknown function               | -1.08 | 44.09   | 18.81   |
| PF3D7_1338000 | conserved Plasmodium membrane protein, unknown function      | 0.55  | 16.35   | 21.56   |
| PF3D7_1338100 | 26S proteasome regulatory subunit RPN3, putative (RPN3)      | 0.07  | 160.56  | 151.71  |
| PF3D7_1338200 | 60S ribosomal protein L6-2, putative                         | -0.14 | 1221.29 | 1002.39 |
| PF3D7_1338300 | elongation factor 1-gamma, putative                          | -0.25 | 724.89  | 550.17  |
| PF3D7_1338400 | conserved Plasmodium protein, unknown function               | 0.91  | 4.39    | 7.45    |
| PF3D7_1338500 | conserved Plasmodium protein, unknown function               | 0.19  | 1.13    | 1.16    |
| PF3D7_1338600 | conserved Plasmodium protein, unknown function               | 1.04  | 26.40   | 48.93   |
| PF3D7_1338700 | conserved Plasmodium protein, unknown function               | 0.58  | 31.71   | 42.91   |
| PF3D7_1338800 | CPW-WPC family protein                                       | 2.04  | 1.64    | 6.13    |
| PF3D7_1338900 | serine/threonine protein kinase, putative                    | 0.65  | 8.00    | 11.34   |
| PF3D7_1339000 | probable protein, unknown function                           | 0.73  | 0.38    | 0.59    |
| PF3D7_1339100 | tRNA Methionine                                              | 3.77  | 0.00    | 3.52    |
| PF3D7_1339200 | tRNA Proline                                                 | 0.19  | 0.00    | 0.00    |
| PF3D7_1339300 | conserved Plasmodium protein, unknown function               | -0.63 | 511.03  | 298.64  |
| PF3D7_1339400 | conserved Plasmodium protein, unknown function               | 0.18  | 20.50   | 21.02   |
| PF3D7_1339500 | mitochondrial ribosomal protein L49 precursor, putative      | 0.81  | 0.93    | 1.51    |
| PF3D7_1339600 | conserved Plasmodium protein, unknown function               | 0.25  | 5.97    | 6.40    |
| PF3D7_1339700 | conserved Plasmodium protein, unknown function               | 0.32  | 14.27   | 16.07   |
| PF3D7_1339800 | mitotic-spindle organizing protein 1, putative               | -0.04 | 4.70    | 4.10    |
| PF3D7_1339900 | ABC transporter B family member 5, putative (ABCB5)          | 0.26  | 4.57    | 4.95    |
| PF3D7_1340000 | secreted ookinete protein, putative (PSOP7)                  | -0.25 | 11.68   | 8.83    |
| PF3D7_1340100 | exosome complex component RRP42, putative (RRP42)            | -0.16 | 42.02   | 33.84   |
| PF3D7_1340200 | conserved Plasmodium protein, unknown function               | -3.62 | 1.65    | 0.00    |
| PF3D7_1340300 | nucleolar complex protein 2, putative                        | -0.56 | 135.14  | 82.80   |
| PF3D7_1340400 | conserved Plasmodium protein, unknown function               | 0.12  | 0.43    | 0.42    |
| PF3D7_1340500 | conserved Plasmodium protein, unknown function               | -0.90 | 7.27    | 3.52    |
| PF3D7_1340600 | RNA lariat debranching enzyme, putative (DBR1)               | -0.13 | 98.56   | 81.52   |
| PF3D7_1340700 | ras-related protein Rab-1B (RAB11b)                          | 0.77  | 26.30   | 40.55   |
| PF3D7_1340800 | mitochondrial pyruvate carrier protein 1, putative (MPC1)    | 0.58  | 16.40   | 22.10   |
| PF3D7_1340900 | sodium-dependent phosphate transporter (PiT)                 | -1.33 | 532.87  | 191.72  |
| PF3D7_1341000 | tRNA Arginine                                                | 0.19  | 0.00    | 0.00    |
| PF3D7_1341100 | U6 spliceosomal RNA                                          | 0.70  | 1.24    | 1.92    |
| PF3D7_1341200 | 60S ribosomal protein L18, putative                          | -0.08 | 1296.07 | 1106.52 |
| PF3D7_1341300 | 60S ribosomal protein L18-2, putative                        | 0.29  | 934.15  | 1028.51 |
| PF3D7_1341400 | small nucleolar RNA snoR20                                   | -0.05 | 299.04  | 260.82  |
| PF3D7_1341500 | inner membrane complex suture component, putative (ISC1)     | 0.62  | 8.65    | 11.98   |
| PF3D7_1341600 | GPI mannosyltransferase 3 (GPI10)                            | 0.28  | 3.04    | 3.33    |
| PF3D7_1341700 | conserved Plasmodium protein, unknown function               | 1.60  | 0.14    | 0.51    |
| PF3D7_1341800 | inner membrane complex protein 1k, putative (IMC1k)          | 0.99  | 13.08   | 23.51   |
| PF3D7_1341900 | V-type proton ATPase subunit D, putative                     | 0.10  | 98.48   | 94.94   |
| PF3D7_1342000 | 40S ribosomal protein S6                                     | 0.08  | 1335.44 | 1272.53 |
| PF3D7_1342100 | aconitate hydratase (IRP)                                    | 0.26  | 49.39   | 53.53   |
| PF3D7_1342200 | conserved Plasmodium membrane protein, unknown function      | 1.63  | 0.32    | 0.92    |
| PF3D7_1342300 | tetratricopeptide repeat family protein, putative            | 0.74  | 7.89    | 11.89   |
| PF3D7_1342400 | casein kinase II beta chain (CK2beta2)                       | 0.29  | 217.90  | 240.52  |
| PF3D7_1342500 | sporozoite protein essential for cell traversal (SPECT1)     | 2.05  | 1.43    | 5.40    |
| PF3D7_1342600 | myosin A (MyoA)                                              | 1.95  | 42.00   | 146.13  |
| PF3D7_1342700 | transcription activator, putative                            | -0.42 | 39.74   | 26.80   |
| PF3D7_1342800 | phosphoenolpyruvate carboxykinase (PEPCK)                    | 0.86  | 25.00   | 41.01   |
| PF3D7_1342900 | transcription factor with AP2 domain(s) (ApiAP2)             | -1.16 | 19.09   | 7.73    |
| PF3D7_1343000 | phosphoethanolamine N-methyltransferase (PMT)                | -0.62 | 1874.75 | 1099.72 |
| PF3D7_1343100 | conserved Plasmodium protein, unknown function               | -0.79 | 56.76   | 29.61   |
| PF3D7_1343200 | tRNA guanosine-2'-O-methyltransferase, putative              | -0.58 | 62.73   | 37.94   |
| PF3D7_1343300 | conserved Plasmodium protein, unknown function               | 0.44  | 41.57   | 50.77   |
| PF3D7_1343400 | DNA repair protein RAD5, putative (RAD5)                     | -0.81 | 30.60   | 15.79   |
| PF3D7_1343500 | conserved Plasmodium protein, unknown function               | 0.43  | 11.59   | 14.13   |
| PF3D7_1343600 | UDP-N-acetylglucosamine pyrophosphorylase, putative          | -0.11 | 4.95    | 4.14    |
| PF3D7_1343700 | kelch protein K13 (K13)                                      | -0.11 | 189.07  | 158.02  |
| PF3D7_1343800 | conserved Plasmodium protein, unknown function               | 1.35  | 4.49    | 10.36   |
| PF3D7_1343900 | U4/U6 small nuclear ribonucleoprotein PRP4, putative (PRPF4) | -0.97 | 33.95   | 15.59   |
| PF3D7_1344000 | aminomethyltransferase, putative                             | 0.26  | 4.20    | 4.53    |
| PF3D7_1344100 | krox-like protein, putative                                  | 0.01  | 25.54   | 23.25   |
| PF3D7_1344200 | heat shock protein 110, putative (HSP110)                    | -1.03 | 337.69  | 148.87  |
| PF3D7_1344300 | conserved protein, unknown function                          | -0.07 | 46.83   | 40.33   |
| PF3D7_1344400 | conserved Plasmodium protein, unknown function               | -1.25 | 10.92   | 4.14    |
| PF3D7_1344500 | U6 snRNA phosphodiesterase, putative (USB1)                  | -0.02 | 12.98   | 11.56   |
| PF3D7_1344600 | lipoyl synthase (LipA)                                       | 1.58  | 6.14    | 16.61   |
| PF3D7_1344700 | conserved Plasmodium protein, unknown function               | -1.63 | 33.78   | 9.81    |
| PF3D7_1344800 | aspartate carbamoyltransferase (ATCase)                      | -0.09 | 59.10   | 50.04   |
| PF3D7_1344900 | conserved Plasmodium protein, unknown function               | -1.33 | 98.68   | 35.46   |
| PF3D7_1345000 | conserved Plasmodium protein, unknown function               | -0.85 | 4.39    | 2.19    |
| PF3D7_1345100 | thioredoxin 2 (TRX2)                                         | -1.32 | 93.99   | 33.96   |
| PF3D7_1345200 | rhomboid protease ROM6, putative (ROM6)                      | -0.47 | 10.60   | 6.88    |
| PF3D7_1345300 | conserved Plasmodium protein, unknown function               | 1.62  | 4.57    | 12.82   |
| PF3D7_1345400 | conserved Plasmodium protein, unknown function               | 0.87  | 11.68   | 19.27   |
| PF3D7_1345500 | ubiquitin-conjugating enzyme E2 (UBC)                        | -0.49 | 8.54    | 5.48    |
| PF3D7_1345600 | inner membrane complex protein                               | 0.99  | 39.28   | 70.33   |
| PF3D7_1345700 | isocitrate dehydrogenase [NADP], mitochondrial (IDH)         | 0.43  | 61.91   | 75.29   |
| PF3D7_1345800 | conserved Plasmodium protein, unknown function               | -0.82 | 42.79   | 21.86   |
| PF3D7_1345900 | kinetochore protein SPC25, putative (SPC25)                  | 0.59  | 16.48   | 22.32   |
| PF3D7_1346000 | dynactin subunit 2, putative                                 | 0.20  | 2.54    | 2.64    |
| PF3D7_1346100 | protein transport protein SEC61 subunit alpha (SEC61)        | -0.58 | 374.73  | 226.36  |
| PF3D7_1346200 | nuclear import protein MOG1, putative                        | -1.36 | 12.77   | 4.45    |
| PF3D7_1346300 | DNA/RNA-binding protein Alba 2 (ALBA2)                       | -0.20 | 1337.08 | 1052.18 |
| PF3D7_1346400 | conserved Plasmodium protein, unknown function               | -0.08 | 57.00   | 48.69   |
| PF3D7_1346500 | conserved Plasmodium protein, unknown function               | -0.27 | 47.24   | 35.38   |
| PF3D7_1346600 | conserved Plasmodium protein, unknown function               | -0.38 | 3.80    | 2.63    |
| PF3D7_1346700 | 6-cysteine protein (P48/45)                                  | 2.22  | 1.80    | 7.59    |

|                 |                                                                                 |       |         |         |
|-----------------|---------------------------------------------------------------------------------|-------|---------|---------|
| PF3D7_1346800   | 6-cysteine protein (P47)                                                        | 1.51  | 0.29    | 0.77    |
| PF3D7_1346900   | conserved Plasmodium protein, unknown function                                  | -0.82 | 21.13   | 10.81   |
| PF3D7_1347000   | WD repeat-containing protein 92, putative (WDR92)                               | 0.70  | 1.83    | 2.68    |
| PF3D7_1347100   | DNA topoisomerase 3, putative (TOP3)                                            | 0.73  | 9.09    | 13.63   |
| PF3D7_1347200   | nucleoside transporter 1 (NT1)                                                  | -0.22 | 711.88  | 552.56  |
| PF3D7_1347300   | conserved Plasmodium membrane protein, unknown function                         | -1.12 | 9.16    | 3.79    |
| PF3D7_1347400   | conserved Plasmodium protein, unknown function                                  | -2.21 | 20.48   | 3.95    |
| PF3D7_1347500   | DNA/RNA-binding protein Alba 4 (ALBA4)                                          | -0.09 | 2119.84 | 1801.41 |
| PF3D7_1347600   | conserved Plasmodium protein, unknown function                                  | 0.63  | 2.87    | 4.03    |
| PF3D7_1347700   | ethanolamine-phosphate cytidyltransferase (ECT)                                 | -0.63 | 211.29  | 122.89  |
| PF3D7_1347800   | leucine-rich repeat protein (LRR4.1)                                            | -0.30 | 1.19    | 0.87    |
| PF3D7_1347900   | conserved Plasmodium protein, unknown function                                  | 0.75  | 1.98    | 3.00    |
| PF3D7_1348000   | conserved Plasmodium protein, unknown function                                  | 0.16  | 2.48    | 2.50    |
| PF3D7_1348100   | GTPase, putative                                                                | 0.53  | 11.42   | 14.84   |
| PF3D7_1348200   | step II splicing factor, putative                                               | -1.74 | 38.90   | 10.45   |
| PF3D7_1348300   | elongation factor Tu, putative                                                  | -1.79 | 35.26   | 9.21    |
| PF3D7_1348400   | conserved Plasmodium membrane protein, unknown function                         | 0.04  | 5.64    | 5.25    |
| PF3D7_1348500   | TBC domain protein, putative                                                    | 0.46  | 20.96   | 26.03   |
| PF3D7_1348600   | conserved Plasmodium protein, unknown function                                  | 0.39  | 19.25   | 22.80   |
| PF3D7_1348700   | WD repeat-containing protein 16, putative (WDR16)                               | 0.29  | 0.89    | 0.98    |
| PF3D7_1348800   | E1-E2 ATPase, putative                                                          | 1.21  | 0.50    | 1.05    |
| PF3D7_1348900   | conserved Plasmodium protein, unknown function                                  | 0.50  | 21.96   | 27.96   |
| PF3D7_1349000   | conserved Plasmodium protein, unknown function                                  | 0.25  | 0.33    | 0.35    |
| PF3D7_1349100   | nucleoside diphosphate hydrolase, putative                                      | 0.06  | 18.31   | 17.22   |
| PF3D7_1349200   | glutamate--tRNA ligase, putative                                                | -0.45 | 206.40  | 136.47  |
| PF3D7_1349300   | tyrosine kinase-like protein (TKL3)                                             | -0.59 | 24.95   | 15.00   |
| PF3D7_1349400   | cytidine and deoxycytidylate deaminase, putative                                | -0.63 | 39.77   | 23.23   |
| PF3D7_1349500   | conserved Plasmodium protein, unknown function                                  | -0.75 | 39.42   | 21.11   |
| PF3D7_1349600   | conserved Plasmodium protein, unknown function                                  | 0.79  | 18.91   | 29.44   |
| PF3D7_1349700   | peptidase, putative                                                             | -0.73 | 39.02   | 21.17   |
| PF3D7_1349800   | nucleolar preribosomal associated cytoplasmic ATPase, putative                  | -0.89 | 37.45   | 18.20   |
| PF3D7_1349900   | conserved Plasmodium protein, unknown function                                  | -0.31 | 3.63    | 2.63    |
| PF3D7_1350000   | conserved Plasmodium protein, unknown function                                  | 1.17  | 0.95    | 1.95    |
| PF3D7_1350100   | lysine--tRNA ligase (KRS1)                                                      | 0.10  | 209.86  | 202.53  |
| PF3D7_1350200   | small nuclear ribonucleoprotein E, putative (SNRPE)                             | -0.88 | 43.85   | 21.48   |
| PF3D7_1350300   | conserved Plasmodium protein, unknown function                                  | -0.70 | 46.24   | 25.71   |
| PF3D7_1350400   | ubiquitin-activating enzyme E1, putative                                        | -0.55 | 3.93    | 2.42    |
| PF3D7_1350500   | conserved Plasmodium protein, unknown function                                  | -0.79 | 96.56   | 50.46   |
| PF3D7_1350600   | conserved Plasmodium protein, unknown function                                  | 0.06  | 6.38    | 6.01    |
| PF3D7_1350700   | N6-adenine-specific methylase, putative                                         | 0.74  | 6.18    | 9.34    |
| PF3D7_1350800   | conserved Plasmodium protein, unknown function                                  | -0.20 | 2.78    | 2.18    |
| PF3D7_1350900   | transcription factor with AP2 domain(s) (ApiAP2)                                | -0.22 | 11.66   | 9.01    |
| PF3D7_1351000   | phosphatidylinositol transfer protein, putative                                 | -0.57 | 81.55   | 49.63   |
| PF3D7_1351100   | conserved protein, unknown function                                             | -0.23 | 76.57   | 59.02   |
| PF3D7_1351200   | conserved Plasmodium protein, unknown function                                  | -1.37 | 18.93   | 6.60    |
| PF3D7_1351300   | conserved Plasmodium membrane protein, unknown function                         | 0.04  | 0.62    | 0.57    |
| PF3D7_1351400   | 60S ribosomal protein L17, putative                                             | 0.02  | 1420.03 | 1297.62 |
| PF3D7_1351500   | small nucleolar RNA snoR21                                                      | -0.12 | 134.09  | 111.02  |
| PF3D7_1351600   | glycerol kinase (GK)                                                            | 1.30  | 8.46    | 18.81   |
| PF3D7_1351700   | inner membrane complex protein 1f, putative (IMC1f)                             | 0.89  | 37.33   | 62.38   |
| PF3D7_1351800.1 | conserved Plasmodium protein, unknown function                                  | -1.82 | 88.34   | 22.56   |
| PF3D7_1351800.2 | conserved Plasmodium protein, unknown function                                  | -1.81 | 86.72   | 22.28   |
| PF3D7_1351900   | conserved Plasmodium protein, unknown function                                  | -0.82 | 102.16  | 52.18   |
| PF3D7_1352000   | conserved Plasmodium protein, unknown function                                  | -0.38 | 5.22    | 3.63    |
| PF3D7_1352100   | ABC transporter B family member 6, putative (ABCB6)                             | -0.56 | 33.66   | 20.53   |
| PF3D7_1352200   | U3 small nucleolar RNA-associated protein 15, putative (UTP15)                  | -0.73 | 111.24  | 60.42   |
| PF3D7_1352300   | conserved Plasmodium protein, unknown function                                  | -2.07 | 5.28    | 1.13    |
| PF3D7_1352400   | conserved Plasmodium protein, unknown function                                  | -1.82 | 32.81   | 8.36    |
| PF3D7_1352500   | thioredoxin-related protein, putative                                           | -0.33 | 320.67  | 229.57  |
| PF3D7_1352600   | protein kinase, putative                                                        | 0.00  | 0.41    | 0.36    |
| PF3D7_1352700   | P-loop containing nucleoside triphosphate hydrolase, putative                   | -1.20 | 57.13   | 22.37   |
| PF3D7_1352800   | vacuolar fusion protein MON1, putative                                          | -0.64 | 25.27   | 14.67   |
| PF3D7_1352900   | Plasmodium exported protein, unknown function                                   | -0.50 | 374.19  | 239.20  |
| PF3D7_1353000   | tryptophan-rich antigen, pseudogene                                             | 0.39  | 236.66  | 279.60  |
| PF3D7_1353100   | Plasmodium exported protein, unknown function                                   | -1.19 | 1144.24 | 451.61  |
| PF3D7_1353200   | membrane associated histidine-rich protein (MAHRP2)                             | -0.35 | 1905.21 | 1345.98 |
| PF3D7_1353300   | conserved Plasmodium protein, unknown function                                  | 0.10  | 27.50   | 26.60   |
| PF3D7_1353400   | Ran-binding protein, putative                                                   | -0.95 | 47.46   | 22.14   |
| PF3D7_1353500   | RNA polymerase II transcription factor B subunit 4, putative (TFB4)             | -0.16 | 11.28   | 9.11    |
| PF3D7_1353600   | ER lumen protein retaining receptor (ERD2)                                      | -0.87 | 125.86  | 62.31   |
| PF3D7_1353700   | reactive oxygen species modulator 1, putative (ROMO1)                           | -0.42 | 23.24   | 15.63   |
| PF3D7_1353800   | proteasome subunit alpha type-4, putative                                       | -0.40 | 91.56   | 62.53   |
| PF3D7_1353900   | proteasome subunit alpha type-7, putative                                       | 0.03  | 146.03  | 134.56  |
| PF3D7_1354000   | conserved Plasmodium protein, unknown function                                  | -0.40 | 0.93    | 0.63    |
| PF3D7_1354100   | conserved Plasmodium protein, unknown function                                  | -1.71 | 4.10    | 1.12    |
| PF3D7_1354200   | inositol-polyphosphate 5-phosphatase, putative (IP5P)                           | -0.25 | 34.46   | 26.07   |
| PF3D7_1354300   | large subunit rRNA methyltransferase, putative                                  | 0.00  | 165.56  | 149.88  |
| PF3D7_1354400   | V-type proton ATPase 21 kDa proteolipid subunit, putative                       | 0.22  | 86.19   | 90.48   |
| PF3D7_1354500   | adenylosuccinate synthetase (ADSS)                                              | -0.19 | 98.16   | 77.60   |
| PF3D7_1354600   | 60S ribosomal protein L7-2, putative                                            | -1.77 | 64.13   | 16.99   |
| PF3D7_1354700   | conserved Plasmodium protein, unknown function                                  | -0.92 | 0.49    | 0.23    |
| PF3D7_1354800   | metacaspase 1 (MCA1)                                                            | 0.12  | 8.95    | 8.75    |
| PF3D7_1354900   | conserved Plasmodium protein, unknown function                                  | -0.46 | 20.56   | 13.51   |
| PF3D7_1355100   | DNA replication licensing factor MCM6 (MCM6)                                    | 0.79  | 51.47   | 80.07   |
| PF3D7_1355200   | RAP protein, putative                                                           | -1.91 | 4.11    | 0.98    |
| PF3D7_1355300   | histone-lysine N-methyltransferase, putative (SET6)                             | -1.46 | 56.75   | 18.56   |
| PF3D7_1355400   | tRNA Threonine                                                                  | 1.77  | 0.31    | 1.58    |
| PF3D7_1355500   | serine/threonine protein phosphatase 5 (PP5)                                    | -0.67 | 90.24   | 51.08   |
| PF3D7_1355600   | conserved Plasmodium protein, unknown function                                  | 1.47  | 2.72    | 6.80    |
| PF3D7_1355700   | NLI interacting factor-like phosphatase, putative (NIF3)                        | -1.35 | 150.13  | 53.05   |
| PF3D7_1355800   | splicing factor 3B subunit 5, putative (SF3B5)                                  | 0.08  | 37.16   | 35.47   |
| PF3D7_1355900   | conserved protein, unknown function                                             | 0.19  | 61.74   | 63.46   |
| PF3D7_1356000   | conserved Plasmodium protein, unknown function                                  | 0.74  | 1.08    | 1.63    |
| PF3D7_1356100   | conserved Plasmodium protein, unknown function                                  | 0.09  | 30.86   | 29.65   |
| PF3D7_1356200   | mitochondrial import inner membrane translocase subunit TIM23, putative (TIM23) | 0.03  | 37.69   | 34.73   |
| PF3D7_1356300   | ubiquitin-conjugating enzyme, putative                                          | 0.48  | 74.67   | 93.97   |
| PF3D7_1356400   | phosphatase 2A regulatory subunit-related protein, putative                     | 0.80  | 4.60    | 7.24    |
| PF3D7_1356500   | conserved Plasmodium protein, unknown function                                  | 1.19  | 0.69    | 1.45    |

|                 |                                                                   |       |         |         |
|-----------------|-------------------------------------------------------------------|-------|---------|---------|
| PF3D7_1356600   | regulator of chromosome condensation, putative                    | -0.10 | 29.87   | 25.06   |
| PF3D7_1356700   | DnaJ protein, putative                                            | -1.26 | 36.32   | 13.66   |
| PF3D7_1356800   | serine/threonine protein kinase, putative (ARK3)                  | 0.77  | 16.15   | 24.76   |
| PF3D7_1356900   | protein kinase 5 (PK5)                                            | 0.56  | 19.87   | 26.40   |
| PF3D7_1357000   | elongation factor 1-alpha                                         | 0.12  | 5288.01 | 5184.78 |
| PF3D7_1357100   | elongation factor 1-alpha                                         | 0.11  | 5192.73 | 5042.52 |
| PF3D7_1357200   | glutamate--tRNA ligase                                            | 0.25  | 7.01    | 7.53    |
| PF3D7_1357300   | dynein light chain, putative                                      | 0.04  | 0.55    | 0.50    |
| PF3D7_1357400   | conserved Plasmodium protein, unknown function                    | 0.64  | 6.27    | 8.81    |
| PF3D7_1357500   | DNA helicase, putative                                            | 0.62  | 18.84   | 26.14   |
| PF3D7_1357600   | conserved Plasmodium protein, unknown function                    | 1.26  | 2.49    | 5.44    |
| PF3D7_1357700   | U3 small nucleolar RNA-associated protein 21, putative (UTP21)    | -1.05 | 99.67   | 43.35   |
| PF3D7_1357800   | T-complex protein 1 subunit delta (CCT4)                          | 0.03  | 350.18  | 323.39  |
| PF3D7_1357900   | pyrroline-5-carboxylate reductase                                 | 0.02  | 64.73   | 59.34   |
| PF3D7_1358000   | patatin-like phospholipase, putative                              | -0.08 | 6.70    | 5.72    |
| PF3D7_1358100   | small subunit rRNA processing factor, putative                    | 0.21  | 164.56  | 171.20  |
| PF3D7_1358200   | conserved Plasmodium protein, unknown function                    | -0.73 | 30.12   | 16.43   |
| PF3D7_1358300   | rhomboid protease ROM7 (ROM7)                                     | -0.69 | 1.51    | 0.83    |
| PF3D7_1358400   | conserved Plasmodium protein, unknown function                    | 0.63  | 8.37    | 11.73   |
| PF3D7_1358500   | zinc finger protein, putative                                     | -0.57 | 31.40   | 19.10   |
| PF3D7_1358600   | zinc finger protein, putative                                     | 0.73  | 12.94   | 19.39   |
| PF3D7_1358700   | HVA22-like protein, putative                                      | -0.81 | 469.86  | 242.21  |
| PF3D7_1358800   | 40S ribosomal protein S15 (RPS15)                                 | 0.12  | 783.50  | 767.97  |
| PF3D7_1358900   | GTP-binding protein, putative                                     | -0.07 | 91.42   | 78.52   |
| PF3D7_1359000   | conserved Plasmodium protein, unknown function                    | -1.48 | 33.32   | 10.78   |
| PF3D7_1359100   | riboflavin kinase / FAD synthase family protein, putative         | -1.30 | 30.36   | 11.10   |
| PF3D7_1359200   | high mobility group protein B4, putative (HMGB4)                  | 0.74  | 17.68   | 26.73   |
| PF3D7_1359300   | exosome complex exonuclease RRP44 (DIS3)                          | -0.38 | 51.82   | 35.80   |
| PF3D7_1359400   | CUGBP Elav-like family member 1 (CELFI)                           | -0.12 | 334.66  | 277.61  |
| PF3D7_1359500   | conserved Plasmodium protein, unknown function                    | -0.68 | 3.90    | 2.19    |
| PF3D7_1359600   | conserved Plasmodium protein, unknown function                    | -0.28 | 37.59   | 27.93   |
| PF3D7_1359700   | conserved Plasmodium protein, unknown function                    | -0.37 | 3.35    | 2.34    |
| PF3D7_1359800   | ADP-ribosylation factor, putative                                 | 0.18  | 5.42    | 5.53    |
| PF3D7_1359900   | conserved Plasmodium membrane protein, unknown function           | -0.59 | 77.55   | 46.53   |
| PF3D7_1360000   | conserved Plasmodium protein, unknown function                    | 0.73  | 10.40   | 15.61   |
| PF3D7_1360100   | RNA-binding protein, putative                                     | -0.05 | 43.36   | 37.75   |
| PF3D7_1360200   | ER membrane protein complex subunit 3, putative (EMC3)            | -0.94 | 87.72   | 41.24   |
| PF3D7_1360300   | conserved Plasmodium protein, unknown function                    | -0.05 | 1.92    | 1.67    |
| PF3D7_1360400   | conserved Plasmodium protein, unknown function                    | -1.89 | 23.23   | 5.62    |
| PF3D7_1360500   | guanylyl cyclase beta (GCheta)                                    | 1.43  | 0.96    | 2.33    |
| PF3D7_1360700   | E3 SUMO-protein ligase PIAS, putative (PIAS)                      | -0.53 | 68.86   | 42.91   |
| PF3D7_1360800   | falcylisin (FLN)                                                  | -0.43 | 251.52  | 168.19  |
| PF3D7_1360900   | polyadenylate-binding protein, putative                           | 0.65  | 50.29   | 71.39   |
| PF3D7_1361000   | protein arginine N-methyltransferase 5, putative (PRMT5)          | -0.50 | 27.47   | 17.48   |
| PF3D7_1361100   | protein transport protein Sec24A (SEC24A)                         | -0.24 | 351.67  | 269.09  |
| PF3D7_1361200   | conserved Plasmodium protein, unknown function                    | -0.24 | 58.53   | 44.86   |
| PF3D7_1361300   | conserved Plasmodium protein, unknown function                    | 0.84  | 0.91    | 1.48    |
| PF3D7_1361400   | actin-depolymerizing factor 2 (ADF2)                              | -0.60 | 23.54   | 13.97   |
| PF3D7_1361500.1 | conserved Plasmodium protein, unknown function                    | 0.92  | 38.15   | 64.93   |
| PF3D7_1361500.2 | conserved Plasmodium protein, unknown function                    | 1.08  | 13.33   | 25.43   |
| PF3D7_1361600   | iron-sulfur assembly protein, putative                            | 1.43  | 5.95    | 14.57   |
| PF3D7_1361700   | cytochrome c oxidase subunit 2, putative                          | 0.88  | 24.85   | 41.30   |
| PF3D7_1361800   | conserved Plasmodium protein, unknown function                    | 1.01  | 93.59   | 169.62  |
| PF3D7_1361900   | proliferating cell nuclear antigen 1 (PCNA1)                      | 0.93  | 100.54  | 172.40  |
| PF3D7_1362000   | conserved Plasmodium protein, unknown function                    | 1.08  | 14.67   | 28.10   |
| PF3D7_1362100   | 14-3-3 protein (14-3-3II)                                         | 1.09  | 5.07    | 9.75    |
| PF3D7_1362200   | RuvB-like helicase 3 (RUVB3)                                      | 0.34  | 82.97   | 94.99   |
| PF3D7_1362300   | conserved protein, unknown function                               | -0.08 | 34.58   | 29.49   |
| PF3D7_1362400   | calpain (Pcalp)                                                   | -0.34 | 51.67   | 36.82   |
| PF3D7_1362500   | exonuclease, putative                                             | 0.59  | 1.56    | 2.12    |
| PF3D7_1362600   | conserved Plasmodium protein, unknown function                    | 0.85  | 3.76    | 6.13    |
| PF3D7_1362700   | conserved Plasmodium protein, unknown function                    | 1.95  | 13.13   | 45.77   |
| PF3D7_1362800   | conserved Plasmodium protein, unknown function                    | -0.07 | 5.95    | 5.11    |
| PF3D7_1362900   | conserved Plasmodium protein, unknown function                    | 0.56  | 1.92    | 2.55    |
| PF3D7_1363000   | conserved Plasmodium protein, unknown function                    | -1.41 | 16.97   | 5.77    |
| PF3D7_1363100   | conserved Plasmodium protein, unknown function                    | -0.54 | 7.87    | 4.87    |
| PF3D7_1363200   | bifunctional polynucleotide phosphatase/kinase (PNKP)             | -1.06 | 24.21   | 10.48   |
| PF3D7_1363300   | 50S ribosomal protein L9, mitochondrial, putative                 | 0.27  | 6.72    | 7.31    |
| PF3D7_1363400   | polyubiquitin binding protein, putative (DOA1)                    | -0.88 | 43.33   | 21.17   |
| PF3D7_1363500   | DNase I-like protein, putative                                    | -0.65 | 9.77    | 5.61    |
| PF3D7_1363600   | conserved Plasmodium protein, unknown function                    | -0.14 | 3.05    | 2.49    |
| PF3D7_1363700   | conserved Plasmodium protein, unknown function                    | 1.09  | 4.07    | 7.81    |
| PF3D7_1363800   | nuclear fusion protein, putative (GEX1)                           | 1.43  | 0.76    | 1.85    |
| PF3D7_1363900   | unspecified product                                               | -2.50 | 1.84    | 0.27    |
| PF3D7_1364000   | conserved Plasmodium protein, unknown function                    | -0.81 | 18.30   | 9.42    |
| PF3D7_1364100   | 6-cysteine protein (P92)                                          | -0.59 | 58.07   | 34.71   |
| PF3D7_1364200   | conserved Plasmodium protein, unknown function                    | -0.86 | 56.55   | 28.10   |
| PF3D7_1364300   | pre-mRNA-splicing factor ATP-dependent RNA helicase PRP16 (PRP16) | -0.47 | 52.23   | 34.00   |
| PF3D7_1364400   | conserved Plasmodium protein, unknown function                    | -0.66 | 26.03   | 14.86   |
| PF3D7_1364500   | exosome complex component RRP45, putative (RRP45)                 | -1.43 | 51.92   | 17.43   |
| PF3D7_1364600   | aldehyde reductase, putative                                      | 0.01  | 9.04    | 8.23    |
| PF3D7_1364700   | conserved Plasmodium protein, unknown function, pseudogene        | -0.06 | 0.53    | 0.46    |
| PF3D7_1364800   | DNA-directed RNA polymerase II, putative                          | -0.10 | 162.09  | 136.50  |
| PF3D7_1364900   | ferrochelatase (FC)                                               | -0.12 | 12.74   | 10.54   |
| PF3D7_1365000   | conserved Plasmodium protein, unknown function                    | -0.15 | 21.48   | 17.42   |
| PF3D7_1365100   | mitochondrial ribosomal protein S17 precursor, putative           | 0.58  | 14.74   | 19.92   |
| PF3D7_1365200   | conserved Plasmodium protein, unknown function                    | -0.18 | 49.68   | 39.56   |
| PF3D7_1365300   | conserved Plasmodium protein, unknown function                    | -1.18 | 26.12   | 10.37   |
| PF3D7_1365400   | ubiquitin-activating enzyme (Uba2)                                | -1.24 | 11.60   | 4.44    |
| PF3D7_1365500   | glycine cleavage system T protein, putative (GCVT)                | 0.09  | 19.41   | 18.60   |
| PF3D7_1365600   | DNA topoisomerase VI, b subunit, putative                         | 0.26  | 11.44   | 12.33   |
| PF3D7_1365700   | SNARE associated Golgi protein, putative                          | -0.86 | 83.32   | 41.33   |
| PF3D7_1365800   | conserved Plasmodium protein, unknown function                    | -0.56 | 59.19   | 36.29   |
| PF3D7_1365900   | ubiquitin-60S ribosomal protein L40                               | 0.11  | 846.96  | 826.28  |
| PF3D7_1366000   | conserved Plasmodium protein, unknown function                    | 0.26  | 31.65   | 34.29   |
| PF3D7_1366100   | conserved Plasmodium protein, unknown function                    | 0.75  | 35.41   | 53.92   |
| PF3D7_1366200   | conserved Plasmodium protein, unknown function                    | 1.22  | 16.56   | 34.93   |
| PF3D7_1366300   | conserved Plasmodium protein, unknown function                    | -0.70 | 68.67   | 38.20   |

|               |                                                                               |       |         |         |
|---------------|-------------------------------------------------------------------------------|-------|---------|---------|
| PF3D7_1366400 | rhoptry protein RHOP148 (RHOP148)                                             | -0.28 | 65.52   | 48.53   |
| PF3D7_1366500 | nucleoside diphosphate kinase (NDK)                                           | 1.35  | 40.57   | 93.25   |
| PF3D7_1366600 | signal recognition particle receptor alpha subunit (SRPR-alpha)               | 0.39  | 98.67   | 116.67  |
| PF3D7_1366700 | conserved Plasmodium protein, unknown function                                | -1.46 | 6.16    | 2.00    |
| PF3D7_1366800 | phosphatidylserine synthase, putative                                         | -0.55 | 46.28   | 28.52   |
| PF3D7_1366900 | conserved Plasmodium protein, unknown function                                | -0.76 | 532.57  | 283.81  |
| PF3D7_1367000 | suppressor of kinetochore protein I, putative (SKP1)                          | 0.50  | 41.82   | 53.36   |
| PF3D7_1367100 | U1 small nuclear ribonucleoprotein, putative                                  | 0.15  | 133.38  | 133.73  |
| PF3D7_1367200 | conserved Plasmodium protein, unknown function                                | 1.36  | 0.55    | 1.29    |
| PF3D7_1367300 | conserved Plasmodium protein, unknown function                                | -0.78 | 2.02    | 1.05    |
| PF3D7_1367400 | conserved Plasmodium protein, unknown function                                | -0.99 | 57.40   | 26.11   |
| PF3D7_1367500 | NADH-cytochrome b5 reductase, putative                                        | 0.18  | 28.86   | 29.48   |
| PF3D7_1367600 | ribosome biogenesis protein MRT4, putative                                    | -0.29 | 80.12   | 58.97   |
| PF3D7_1367700 | alanine--tRNA ligase (AlaRS)                                                  | -0.18 | 122.51  | 97.88   |
| PF3D7_1367800 | secreted ookinete protein, putative (PSOP2)                                   | 1.07  | 0.47    | 0.90    |
| PF3D7_1367900 | conserved Plasmodium protein, unknown function                                | 0.88  | 0.77    | 1.29    |
| PF3D7_1368000 | conserved Plasmodium protein, unknown function                                | 0.75  | 1.28    | 1.98    |
| PF3D7_1368100 | 26S proteasome regulatory subunit RPN11, putative (RPN11)                     | -0.06 | 57.24   | 49.55   |
| PF3D7_1368200 | ABC transporter E family member 1, putative (ABCE1)                           | -0.83 | 142.70  | 72.52   |
| PF3D7_1368300 | conserved Plasmodium protein, unknown function                                | -0.83 | 24.53   | 12.40   |
| PF3D7_1368400 | conserved Plasmodium protein, unknown function                                | 0.29  | 43.73   | 48.14   |
| PF3D7_1368500 | conserved Plasmodium protein, unknown function                                | -0.63 | 2.77    | 1.61    |
| PF3D7_1368600 | mitochondrial import inner membrane translocase subunit TIM9, putative (TIM9) | 0.64  | 16.86   | 23.69   |
| PF3D7_1368700 | mitochondrial carrier protein, putative                                       | -0.10 | 17.33   | 14.62   |
| PF3D7_1368800 | DNA repair endonuclease, putative (ERCC4)                                     | 0.81  | 6.00    | 9.48    |
| PF3D7_1368900 | conserved Plasmodium protein, unknown function                                | -0.04 | 88.64   | 77.72   |
| PF3D7_1369000 | glycosylphosphatidylinositol anchor attachment 1 protein, putative (GPA1)     | 0.01  | 19.73   | 17.89   |
| PF3D7_1369100 | conserved Plasmodium protein, unknown function                                | 0.11  | 8.44    | 8.22    |
| PF3D7_1369200 | conserved Plasmodium protein, unknown function                                | -1.08 | 31.51   | 13.41   |
| PF3D7_1369300 | conserved Plasmodium protein, unknown function                                | 1.59  | 1.54    | 4.21    |
| PF3D7_1369400 | conserved Plasmodium protein, unknown function                                | -0.86 | 5.41    | 2.68    |
| PF3D7_1369500 | conserved Plasmodium protein, unknown function                                | -1.68 | 67.81   | 19.07   |
| PF3D7_1369600 | conserved Plasmodium protein, unknown function                                | 0.01  | 8.82    | 8.00    |
| PF3D7_1369700 | U2 small nuclear ribonucleoprotein A', putative                               | -1.57 | 79.93   | 24.34   |
| PF3D7_1369800 | tRNA Arginine                                                                 | 0.05  | 3.03    | 2.80    |
| PF3D7_1369900 | tRNA Tryptophan                                                               | -0.81 | 0.31    | 0.00    |
| PF3D7_1370000 | tRNA Arginine                                                                 | 0.02  | 2.42    | 2.18    |
| PF3D7_1370100 | tRNA Cysteine                                                                 | -2.40 | 1.56    | 0.00    |
| PF3D7_1370200 | tRNA Glycine                                                                  | -0.81 | 0.32    | 0.00    |
| PF3D7_1370300 | membrane associated histidine-rich protein (MAHRP1)                           | -1.48 | 3738.17 | 1207.82 |
| PF3D7_1370500 | unspecified product                                                           | 1.24  | 82.42   | 175.14  |
| PF3D7_1370800 | unspecified product                                                           | 1.24  | 31.09   | 66.35   |
| PF3D7_1370900 | unspecified product                                                           | -0.14 | 88.40   | 72.33   |
| PF3D7_1371000 | 18S ribosomal RNA                                                             | 2.56  | 16.06   | 85.49   |
| PF3D7_1371200 | 5.8S ribosomal RNA                                                            | -0.81 | 0.14    | 0.00    |
| PF3D7_1371300 | 28S ribosomal RNA                                                             | 1.56  | 7.77    | 20.75   |
| PF3D7_1371500 | probable protein, unknown function                                            | 0.28  | 1.33    | 1.45    |
| PF3D7_1371600 | erythrocyte binding like protein 1, pseudogene (EBL1)                         | 1.29  | 13.63   | 30.03   |
| PF3D7_1371700 | serine/threonine protein kinase, FIKK family                                  | -0.60 | 10.14   | 6.02    |
| PF3D7_1371800 | Plasmodium exported protein, unknown function                                 | 1.00  | 7.89    | 14.26   |
| PF3D7_1371900 | Plasmodium exported protein, unknown function                                 | 0.14  | 7.11    | 7.06    |
| PF3D7_1372000 | Plasmodium exported protein (PHISTa), unknown function                        | -0.73 | 74.29   | 40.42   |
| PF3D7_1372100 | Plasmodium exported protein (PHISTb), unknown function (GEXP04)               | 0.05  | 1.04    | 0.97    |
| PF3D7_1372200 | histidine-rich protein III (HRPIII)                                           | -0.22 | 5474.06 | 4232.24 |
| PF3D7_1372300 | Plasmodium exported protein (PHIST), unknown function                         | -0.15 | 448.28  | 364.48  |
| PF3D7_1372400 | acyl-CoA synthetase (ACS4)                                                    | 0.48  | 12.54   | 15.81   |
| PF3D7_1372500 | stevor, pseudogene                                                            | 6.80  | 0.62    | 64.77   |
| PF3D7_1372600 | rifin (RIF)                                                                   | 10.67 | 0.00    | 40.24   |
| PF3D7_1372700 | rifin (RIF)                                                                   | 3.25  | 0.04    | 0.53    |
| PF3D7_1372800 | stevor                                                                        | 2.51  | 0.05    | 0.36    |
| PF3D7_1372900 | erythrocyte membrane protein 1 (PfEMP1), exon 2, pseudogene (VAR)             | 3.65  | 0.00    | 0.17    |
| PF3D7_1373000 | rifin (RIF)                                                                   | 2.91  | 0.09    | 0.73    |
| PF3D7_1373100 | rifin (RIF)                                                                   | 1.77  | 0.00    | 0.04    |
| PF3D7_1373200 | Plasmodium exported protein, unknown function, fragment                       | 0.19  | 0.00    | 0.00    |
| PF3D7_1373300 | rifin (RIF)                                                                   | 0.36  | 0.48    | 0.56    |
| PF3D7_1373400 | rifin (RIF)                                                                   | 0.28  | 15.35   | 16.84   |
| PF3D7_1373500 | erythrocyte membrane protein 1, PfEMP1 (VAR)                                  | 0.81  | 5.88    | 9.26    |
| PF3D7_1400100 | erythrocyte membrane protein 1 (PfEMP1), truncated, pseudogene                | 1.61  | 0.32    | 0.89    |
| PF3D7_1400200 | rifin (RIF)                                                                   | 1.36  | 0.23    | 0.55    |
| PF3D7_1400300 | rifin (RIF)                                                                   | 3.77  | 0.00    | 0.25    |
| PF3D7_1400400 | rifin (RIF)                                                                   | 2.33  | 0.09    | 0.48    |
| PF3D7_1400500 | rifin (RIF)                                                                   | 1.41  | 0.04    | 0.14    |
| PF3D7_1400600 | rifin (RIF)                                                                   | 1.97  | 0.16    | 0.63    |
| PF3D7_1400700 | stevor                                                                        | 5.05  | 0.00    | 0.73    |
| PF3D7_1400800 | rifin (RIF)                                                                   | 3.00  | 0.05    | 0.48    |
| PF3D7_1400900 | Plasmodium exported protein (PHISTa), unknown function, pseudogene            | 0.19  | 0.08    | 0.08    |
| PF3D7_1401000 | glycophorin binding protein (GBPH)                                            | 2.55  | 1.19    | 6.38    |
| PF3D7_1401100 | DnaJ protein, putative                                                        | 0.42  | 1212.90 | 1463.27 |
| PF3D7_1401200 | Plasmodium exported protein, unknown function                                 | 1.51  | 16.57   | 42.67   |
| PF3D7_1401300 | aminopeptidase, putative                                                      | -0.99 | 14.49   | 6.59    |
| PF3D7_1401400 | early transcribed membrane protein 14.1 (ETRAPM14)                            | -0.78 | 9473.39 | 4988.92 |
| PF3D7_1401500 | lysophospholipase, putative                                                   | -0.58 | 18.83   | 11.39   |
| PF3D7_1401600 | Plasmodium exported protein (PHISTb), unknown function                        | 0.03  | 267.88  | 245.93  |
| PF3D7_1401700 | Plasmodium exported protein, unknown function                                 | 0.57  | 1.79    | 2.41    |
| PF3D7_1401800 | choline kinase (CK)                                                           | -0.34 | 80.68   | 57.69   |
| PF3D7_1401900 | conserved Plasmodium protein, unknown function                                | 1.95  | 3.46    | 12.14   |
| PF3D7_1402000 | conserved Plasmodium protein, unknown function                                | -0.17 | 12.70   | 10.20   |
| PF3D7_1402100 | conserved Plasmodium protein, unknown function                                | 0.15  | 8.86    | 8.90    |
| PF3D7_1402200 | conserved Plasmodium protein, unknown function                                | 0.22  | 86.48   | 90.86   |
| PF3D7_1402300 | 26S proteasome regulatory subunit RPN6 (RPN6)                                 | -0.97 | 115.46  | 53.14   |
| PF3D7_1402400 | U1 small nuclear ribonucleoprotein C, putative                                | -1.06 | 32.98   | 14.29   |
| PF3D7_1402500 | ubiquitin-40S ribosomal protein S27a, putative                                | -0.48 | 655.46  | 423.45  |
| PF3D7_1402600 | small nucleolar RNA snoR22                                                    | -2.87 | 6.48    | 0.55    |
| PF3D7_1402700 | U2 snRNP-associated SURP motif-containing protein, putative (SR140)           | -0.18 | 88.86   | 70.99   |
| PF3D7_1402800 | conserved Plasmodium protein, unknown function                                | -0.52 | 60.27   | 38.01   |
| PF3D7_1402900 | conserved Plasmodium protein, unknown function                                | -1.76 | 5.17    | 1.37    |
| PF3D7_1403000 | conserved Plasmodium protein, unknown function                                | 2.14  | 0.48    | 1.94    |
| PF3D7_1403100 | conserved Plasmodium protein, unknown function                                | 0.38  | 23.77   | 27.88   |

|                 |                                                                      |       |         |         |
|-----------------|----------------------------------------------------------------------|-------|---------|---------|
| PF3D7_1403200   | conserved Plasmodium protein, unknown function                       | 3.03  | 0.79    | 6.02    |
| PF3D7_1403300   | conserved Plasmodium protein, unknown function                       | 1.37  | 0.28    | 0.67    |
| PF3D7_1403400   | conserved Plasmodium protein, unknown function                       | -0.35 | 5.39    | 3.82    |
| PF3D7_1403500   | conserved Plasmodium protein, unknown function                       | -0.31 | 9.31    | 6.77    |
| PF3D7_1403600   | selenoprotein (Sell)                                                 | -0.23 | 25.65   | 19.68   |
| PF3D7_1403700   | translocation associated membrane protein, putative (TRAM)           | 1.01  | 3.82    | 6.97    |
| PF3D7_1403800   | nuclear formin-like protein (MISFIT)                                 | -0.05 | 4.00    | 3.50    |
| PF3D7_1403900   | serine/threonine protein phosphatase CPPED1, putative (CPPED1)       | -0.25 | 30.42   | 23.11   |
| PF3D7_1404000   | DNA-directed RNA polymerase II subunit RPB4, putative (RPB4)         | -0.70 | 4.36    | 2.40    |
| PF3D7_1404100   | cytochrome c, putative                                               | 0.28  | 99.06   | 108.33  |
| PF3D7_1404200   | conserved Plasmodium protein, unknown function                       | 0.39  | 4.73    | 5.62    |
| PF3D7_1404300   | secreted ookinete adhesive protein, putative (SOAP)                  | 1.46  | 2.28    | 5.71    |
| PF3D7_1404400   | mitochondrial ribosomal protein L16 precursor, putative              | 1.43  | 9.35    | 22.86   |
| PF3D7_1404500   | rRNA biogenesis protein RRP5, putative (RRP5)                        | -0.49 | 56.04   | 36.11   |
| PF3D7_1404600.1 | adenylyl cyclase alpha (ACalpha)                                     | 1.15  | 2.22    | 4.45    |
| PF3D7_1404600.2 | adenylyl cyclase alpha (ACalpha)                                     | 1.22  | 2.67    | 5.61    |
| PF3D7_1404600.3 | adenylyl cyclase alpha                                               | 1.16  | 2.35    | 4.75    |
| PF3D7_1404700   | conserved Plasmodium protein, unknown function                       | 0.31  | 4.26    | 4.77    |
| PF3D7_1404800   | conserved Plasmodium protein, unknown function                       | -1.84 | 661.01  | 166.11  |
| PF3D7_1404900   | conserved Plasmodium protein, unknown function                       | -0.97 | 560.29  | 257.86  |
| PF3D7_1405000   | conserved Plasmodium protein, unknown function                       | -0.75 | 23.75   | 12.72   |
| PF3D7_1405100   | GTPase-activating protein, putative                                  | -0.42 | 14.60   | 9.87    |
| PF3D7_1405200   | trafficking protein particle complex subunit 1, putative (BET5)      | -0.65 | 6.04    | 3.46    |
| PF3D7_1405300   | conserved Plasmodium protein, unknown function                       | -0.30 | 5.62    | 4.11    |
| PF3D7_1405400   | DNA mismatch repair protein, putative                                | -0.13 | 3.81    | 3.14    |
| PF3D7_1405500   | COBW domain-containing protein 1, putative (CBWD1)                   | -1.07 | 25.02   | 10.77   |
| PF3D7_1405600   | ribonucleotide reductase small subunit (RNR)                         | 0.73  | 61.20   | 91.37   |
| PF3D7_1405700   | RING zinc finger protein, putative                                   | -0.50 | 21.36   | 13.62   |
| PF3D7_1405800   | ribosome biogenesis protein BOP1, putative (BOP1)                    | -0.09 | 159.52  | 135.24  |
| PF3D7_1405900   | RNA-binding protein, putative                                        | 0.01  | 63.18   | 57.25   |
| PF3D7_1406000   | RNA-binding protein, putative                                        | 0.05  | 29.38   | 27.51   |
| PF3D7_1406100   | conserved Plasmodium protein, unknown function                       | -1.29 | 16.95   | 6.26    |
| PF3D7_1406200   | conserved Plasmodium protein, unknown function                       | -0.20 | 103.86  | 81.39   |
| PF3D7_1406300   | glycerophosphodiester phosphodiesterase (GDPD)                       | -0.27 | 23.47   | 17.60   |
| PF3D7_1406400   | PPR repeat protein (PPR)                                             | -0.11 | 7.32    | 6.13    |
| PF3D7_1406500   | WD repeat-containing protein 65, putative (WDR65)                    | 1.03  | 0.64    | 1.19    |
| PF3D7_1406600   | ATP-dependent Clp protease, putative (ClpC)                          | -0.29 | 15.80   | 11.69   |
| PF3D7_1406700   | vacuolar protein sorting-associated protein 29, putative (VPS29)     | 0.90  | 15.70   | 26.38   |
| PF3D7_1406800   | glideosome associated protein with multiple membrane spans 3 (GAPM3) | 0.31  | 210.56  | 236.31  |
| PF3D7_1406900   | radical SAM protein, putative                                        | 0.96  | 4.32    | 7.61    |
| PF3D7_1407000   | LCCL domain-containing protein (CCp3)                                | 1.22  | 1.21    | 2.56    |
| PF3D7_1407100   | rRNA 2'-O-methyltransferase fibrillar, putative (NOP1)               | -0.01 | 470.46  | 421.93  |
| PF3D7_1407200   | conserved Plasmodium protein, unknown function                       | -0.65 | 42.84   | 24.64   |
| PF3D7_1407300   | pre-mRNA-splicing factor 38B, putative (PRP38B)                      | 0.06  | 154.57  | 145.81  |
| PF3D7_1407400   | conserved Plasmodium protein, unknown function                       | -0.23 | 35.69   | 27.48   |
| PF3D7_1407500   | tRNA m2G10 methyltransferase subunit, putative                       | -0.29 | 44.33   | 32.60   |
| PF3D7_1407600   | conserved Plasmodium protein, unknown function                       | 0.73  | 3.54    | 5.30    |
| PF3D7_1407700   | conserved Plasmodium protein, unknown function                       | 0.71  | 5.60    | 8.28    |
| PF3D7_1407800   | plasmepsin IV (PM4)                                                  | -0.87 | 1129.17 | 558.06  |
| PF3D7_1407900   | plasmepsin I (PM1)                                                   | -0.55 | 894.12  | 549.50  |
| PF3D7_1408000   | plasmepsin II                                                        | -0.91 | 175.33  | 83.95   |
| PF3D7_1408100   | plasmepsin III (HAP)                                                 | -0.58 | 591.53  | 357.15  |
| PF3D7_1408200   | transcription factor with AP2 domain(s) (AP2-G2)                     | -0.74 | 157.02  | 84.52   |
| PF3D7_1408300   | conserved Plasmodium protein, unknown function                       | -0.46 | 2.39    | 1.54    |
| PF3D7_1408400   | DNA repair helicase, putative                                        | -0.51 | 27.18   | 17.24   |
| PF3D7_1408500   | conserved Plasmodium protein, unknown function                       | -1.22 | 77.60   | 30.04   |
| PF3D7_1408600   | 40S ribosomal protein S8e, putative                                  | 0.33  | 1218.68 | 1385.62 |
| PF3D7_1408700   | conserved Plasmodium protein, unknown function                       | -1.02 | 49.32   | 21.99   |
| PF3D7_1408800   | conserved Plasmodium protein, unknown function                       | 1.03  | 0.45    | 0.85    |
| PF3D7_1408900   | tRNA-dihydrouridine synthase, putative                               | -0.68 | 34.53   | 19.45   |
| PF3D7_1409000   | WD repeat-containing protein, putative                               | -1.14 | 43.02   | 17.64   |
| PF3D7_1409100   | aldo-keto reductase, putative                                        | 1.01  | 14.10   | 25.66   |
| PF3D7_1409200.1 | conserved Plasmodium protein, unknown function                       | -0.49 | 20.49   | 13.12   |
| PF3D7_1409200.2 | conserved Plasmodium protein, unknown function                       | -0.49 | 21.80   | 13.96   |
| PF3D7_1409300   | DNA damage-inducible protein 1, putative (DDI1)                      | 0.18  | 47.02   | 48.08   |
| PF3D7_1409400   | conserved Plasmodium membrane protein, unknown function              | 0.34  | 111.60  | 127.47  |
| PF3D7_1409500   | conserved Plasmodium protein, unknown function                       | 0.51  | 4.82    | 6.19    |
| PF3D7_1409600   | conserved Plasmodium protein, unknown function                       | -1.09 | 52.00   | 22.02   |
| PF3D7_1409700   | conserved Plasmodium protein, unknown function                       | -0.63 | 1.84    | 1.07    |
| PF3D7_1409800   | CUGBP Elav-like family member 2, putative (CELF2)                    | 0.10  | 10.26   | 9.93    |
| PF3D7_1409900   | cytidine diphosphate-diacylglycerol synthase (CDS)                   | -0.34 | 69.98   | 49.71   |
| PF3D7_1410000   | ER membrane protein complex subunit 2, putative (EMC2)               | -1.78 | 94.52   | 24.89   |
| PF3D7_1410100   | alpha/beta hydrolase, putative                                       | 0.00  | 2.43    | 2.19    |
| PF3D7_1410200   | cytidine triphosphate synthetase                                     | -0.37 | 166.79  | 116.11  |
| PF3D7_1410300   | WD repeat-containing protein, putative                               | -0.51 | 23.29   | 14.75   |
| PF3D7_1410400   | rho-try-associated protein 1 (RAP1)                                  | -0.13 | 444.78  | 366.98  |
| PF3D7_1410500   | conserved Plasmodium protein, unknown function                       | -0.46 | 13.26   | 8.65    |
| PF3D7_1410600   | eukaryotic translation initiation factor 2 gamma subunit, putative   | 0.09  | 665.36  | 641.12  |
| PF3D7_1410700   | conserved Plasmodium protein, unknown function                       | -0.85 | 32.50   | 16.20   |
| PF3D7_1410800   | ankyrin-repeat protein, putative                                     | 0.20  | 23.44   | 24.36   |
| PF3D7_1410900   | ribosome maturation protein SBDS, putative                           | -0.11 | 54.47   | 45.63   |
| PF3D7_1411000.1 | conserved Plasmodium protein, unknown function                       | 0.58  | 3.93    | 5.29    |
| PF3D7_1411000.2 | conserved Plasmodium protein, unknown function                       | 0.57  | 3.97    | 5.33    |
| PF3D7_1411100.1 | conserved Plasmodium membrane protein, unknown function              | -0.43 | 22.46   | 15.00   |
| PF3D7_1411100.2 | conserved Plasmodium membrane protein, unknown function              | -0.35 | 20.99   | 14.83   |
| PF3D7_1411200   | rhomboid protease ROMS (ROMS)                                        | -1.04 | 252.80  | 111.04  |
| PF3D7_1411300   | conserved Plasmodium protein, unknown function                       | -0.54 | 31.41   | 19.48   |
| PF3D7_1411400   | plastid replication-repair enzyme (PREX)                             | -0.06 | 8.31    | 7.17    |
| PF3D7_1411500   | conserved Plasmodium protein, unknown function                       | -1.33 | 33.73   | 12.13   |
| PF3D7_1411600   | GTP-binding protein, putative                                        | 0.31  | 3.09    | 3.46    |
| PF3D7_1411700   | conserved protein, unknown function                                  | -0.87 | 15.77   | 7.76    |
| PF3D7_1411800   | conserved Plasmodium protein, unknown function                       | -0.91 | 15.63   | 7.50    |
| PF3D7_1411900   | p1/s1 nuclease, putative                                             | -1.33 | 252.72  | 90.95   |
| PF3D7_1412000   | p1/s1 nuclease, putative                                             | -1.00 | 18.12   | 8.15    |
| PF3D7_1412100   | conserved Plasmodium protein, unknown function                       | -0.46 | 17.90   | 11.74   |
| PF3D7_1412200   | conserved Plasmodium protein, unknown function                       | -0.68 | 15.80   | 8.90    |
| PF3D7_1412300   | nuclear transport factor 2, putative (NTF2)                          | -0.12 | 261.33  | 217.63  |
| PF3D7_1412400   | conserved Plasmodium protein, unknown function                       | -0.55 | 36.89   | 22.68   |



|                 |                                                                               |       |         |         |
|-----------------|-------------------------------------------------------------------------------|-------|---------|---------|
| PF3D7_1412500   | actin II (ACT2)                                                               | -0.14 | 147.75  | 121.14  |
| PF3D7_1412600   | deoxyhypusine synthase (DHS)                                                  | -0.49 | 47.37   | 30.51   |
| PF3D7_1412700   | AAA family ATPase, putative                                                   | -0.47 | 19.57   | 12.70   |
| PF3D7_1412800   | glycylpeptide N-tetradecanoyltransferase (NMT)                                | -0.23 | 264.85  | 203.40  |
| PF3D7_1412900.1 | ubiquitin-conjugating enzyme, putative                                        | -0.24 | 181.04  | 138.62  |
| PF3D7_1412900.2 | ubiquitin-conjugating enzyme, putative                                        | 0.05  | 123.60  | 115.07  |
| PF3D7_1413000   | conserved Plasmodium protein, unknown function                                | 0.28  | 0.24    | 0.26    |
| PF3D7_1413100   | conserved Plasmodium protein, unknown function                                | -0.49 | 0.51    | 0.32    |
| PF3D7_1413200   | conserved Plasmodium protein, unknown function                                | 2.54  | 5.15    | 27.17   |
| PF3D7_1413300   | conserved Plasmodium protein, unknown function                                | -1.81 | 0.76    | 0.11    |
| PF3D7_1413400   | 30S ribosomal protein S9, putative                                            | 0.49  | 10.17   | 12.89   |
| PF3D7_1413500   | FeS assembly ATPase SufC (SufC)                                               | 0.39  | 12.06   | 14.27   |
| PF3D7_1413600   | conserved Plasmodium protein, unknown function                                | -0.51 | 1.28    | 0.81    |
| PF3D7_1413700   | conserved Plasmodium protein, unknown function                                | 0.72  | 10.00   | 14.89   |
| PF3D7_1413800   | diphthamide biosynthesis protein I, putative (DPH1)                           | -1.07 | 77.85   | 33.44   |
| PF3D7_1413900   | DnaJ protein, putative                                                        | -1.64 | 99.27   | 28.80   |
| PF3D7_1414000   | 26S proteasome regulatory subunit RPN13, putative (RPN13)                     | 0.91  | 38.33   | 64.89   |
| PF3D7_1414100   | conserved Plasmodium protein, unknown function                                | -1.25 | 97.94   | 37.23   |
| PF3D7_1414200   | conserved Plasmodium protein, unknown function                                | -2.17 | 98.55   | 19.72   |
| PF3D7_1414300   | 60S ribosomal protein L10, putative                                           | 0.45  | 1017.83 | 1251.44 |
| PF3D7_1414400   | serine/threonine protein phosphatase PP1 (PP1)                                | 0.35  | 135.92  | 156.18  |
| PF3D7_1414500   | atypical protein kinase, ABC-1 family, putative (ABCK2)                       | -0.10 | 77.11   | 64.83   |
| PF3D7_1414600   | RNA guanylyltransferase (Pgt1)                                                | -0.71 | 84.30   | 46.59   |
| PF3D7_1414700   | ubiquitin carboxyl-terminal hydrolase, putative                               | -1.34 | 39.73   | 14.11   |
| PF3D7_1414800   | small nuclear ribonucleoprotein-associated protein B, putative (SMB1)         | -0.67 | 142.01  | 80.49   |
| PF3D7_1414900   | ATP-dependent protease, putative                                              | -0.49 | 2.65    | 1.71    |
| PF3D7_1415000   | uracil-DNA glycosylase (UDG)                                                  | 0.41  | 16.51   | 19.82   |
| PF3D7_1415100   | conserved Plasmodium protein, unknown function                                | 0.33  | 3.60    | 4.08    |
| PF3D7_1415200   | DNA-directed RNA polymerase I/III subunit, putative                           | -0.13 | 24.94   | 20.58   |
| PF3D7_1415300   | RNA-binding protein Nova-1, putative                                          | 0.93  | 23.06   | 39.56   |
| PF3D7_1415400   | conserved Plasmodium protein, unknown function                                | 0.31  | 20.90   | 23.36   |
| PF3D7_1415500   | conserved Plasmodium membrane protein, unknown function                       | -1.13 | 2.29    | 0.94    |
| PF3D7_1415600   | conserved Plasmodium protein, unknown function                                | -0.82 | 17.86   | 9.13    |
| PF3D7_1415700   | serine C-palmitoyltransferase, putative                                       | 0.04  | 15.12   | 13.97   |
| PF3D7_1415800   | dimethyladenosine transferase, putative                                       | -0.27 | 87.88   | 65.96   |
| PF3D7_1415900   | zinc finger protein, putative                                                 | -0.41 | 78.17   | 52.90   |
| PF3D7_1416000   | conserved Plasmodium protein, unknown function                                | -1.08 | 1.93    | 0.80    |
| PF3D7_1416100   | protein SEY1, putative (SEY1)                                                 | -1.06 | 74.77   | 32.34   |
| PF3D7_1416200   | metacaspase-like protein (MCA3)                                               | 0.58  | 12.87   | 17.33   |
| PF3D7_1416300   | conserved protein, unknown function                                           | 0.10  | 12.16   | 11.74   |
| PF3D7_1416400   | conserved Plasmodium protein, unknown function                                | -0.01 | 5.65    | 5.05    |
| PF3D7_1416500   | NADP-specific glutamate dehydrogenase (GDH1)                                  | -0.33 | 73.94   | 53.18   |
| PF3D7_1416600   | conserved Plasmodium protein, unknown function                                | 2.21  | 1.02    | 4.27    |
| PF3D7_1416700   | conserved Plasmodium protein, unknown function                                | 0.76  | 1.80    | 2.77    |
| PF3D7_1416800   | lysine-tRNA ligase, putative                                                  | 1.25  | 5.35    | 11.46   |
| PF3D7_1416900   | prefoldin subunit 2, putative                                                 | 0.94  | 25.02   | 43.47   |
| PF3D7_1417000   | inner membrane complex protein 1I, putative (IMC11)                           | 3.51  | 0.37    | 3.99    |
| PF3D7_1417100   | conserved Plasmodium protein, unknown function                                | 0.52  | 5.70    | 7.40    |
| PF3D7_1417200   | NOT family protein, putative                                                  | -1.19 | 128.30  | 50.63   |
| PF3D7_1417300   | cysteine protease ATG4, putative (ATG4)                                       | -0.15 | 7.22    | 5.85    |
| PF3D7_1417400   | rap guanine nucleotide exchange factor, putative, pseudogene (EPAC)           | 0.42  | 6.06    | 7.32    |
| PF3D7_1417500   | H/ACA ribonucleoprotein complex subunit 4, putative (CBF5)                    | 0.00  | 137.23  | 123.78  |
| PF3D7_1417600   | conserved Plasmodium protein, unknown function                                | -0.50 | 100.92  | 64.51   |
| PF3D7_1417700   | conserved Plasmodium protein, unknown function                                | 0.28  | 46.51   | 50.99   |
| PF3D7_1417800   | DNA replication licensing factor MCM2 (MCM2)                                  | 0.88  | 56.58   | 93.75   |
| PF3D7_1417900   | conserved Plasmodium protein, unknown function                                | 1.04  | 8.24    | 15.30   |
| PF3D7_1418000   | ubiquitin fusion degradation protein UFD1, putative (UFD1)                    | 0.37  | 44.19   | 51.38   |
| PF3D7_1418100   | liver specific protein 1, putative (LISP1)                                    | 1.32  | 0.12    | 0.27    |
| PF3D7_1418200   | conserved Plasmodium protein, unknown function                                | -0.40 | 5.86    | 4.00    |
| PF3D7_1418300   | calmodulin, putative                                                          | 0.89  | 12.81   | 21.41   |
| PF3D7_1418400   | tRNA Proline                                                                  | 0.19  | 0.00    | 0.00    |
| PF3D7_1418500   | 5S ribosomal RNA                                                              | 0.13  | 4.71    | 4.64    |
| PF3D7_1418600   | 5S ribosomal RNA                                                              | 0.49  | 3.01    | 3.87    |
| PF3D7_1418700   | 5S ribosomal RNA                                                              | 0.53  | 2.64    | 3.48    |
| PF3D7_1418800   | signal recognition particle RNA                                               | 3.87  | 22.47   | 296.37  |
| PF3D7_1418900   | DEAD/DEAH box ATP-dependent RNA helicase, putative                            | -0.19 | 69.44   | 54.73   |
| PF3D7_1419000   | conserved Plasmodium protein, unknown function                                | -0.41 | 29.90   | 20.31   |
| PF3D7_1419100   | ATP-dependent RNA helicase, putative                                          | -0.51 | 49.09   | 31.00   |
| PF3D7_1419200   | thioredoxin-like protein, putative                                            | -0.26 | 8.96    | 6.74    |
| PF3D7_1419300   | glutathione S-transferase (GST)                                               | -0.73 | 123.48  | 67.21   |
| PF3D7_1419400   | conserved Plasmodium membrane protein, unknown function                       | -1.52 | 61.47   | 19.40   |
| PF3D7_1419500   | conserved Plasmodium protein, unknown function                                | -0.11 | 1.27    | 1.05    |
| PF3D7_1419600   | conserved Plasmodium protein, unknown function                                | -0.59 | 47.67   | 28.57   |
| PF3D7_1419700   | conserved Plasmodium protein, unknown function                                | -0.19 | 164.65  | 130.28  |
| PF3D7_1419800.1 | glutathione reductase (GR)                                                    | 0.06  | 18.50   | 17.38   |
| PF3D7_1419800.2 | glutathione reductase (GR)                                                    | 0.05  | 17.13   | 16.00   |
| PF3D7_1419900   | YTH domain-containing protein, putative                                       | -0.79 | 34.64   | 18.11   |
| PF3D7_1420000   | splicing factor 3B subunit 4, putative (SF3B4)                                | -0.62 | 273.65  | 160.29  |
| PF3D7_1420100   | conserved Plasmodium protein, unknown function                                | 0.83  | 1.57    | 2.51    |
| PF3D7_1420200   | tetratricopeptide repeat family protein, putative                             | 0.10  | 13.31   | 12.85   |
| PF3D7_1420300   | zinc finger protein, putative                                                 | -0.09 | 29.10   | 24.68   |
| PF3D7_1420400   | glycine-tRNA ligase (GlyRS)                                                   | -0.51 | 201.24  | 127.93  |
| PF3D7_1420500   | conserved Plasmodium membrane protein, unknown function                       | 0.04  | 0.50    | 0.46    |
| PF3D7_1420600   | pantothenate kinase, putative (PANK)                                          | -0.15 | 16.87   | 13.76   |
| PF3D7_1420700   | surface protein P113 (P113)                                                   | -0.34 | 1199.54 | 854.31  |
| PF3D7_1420800   | dynein-associated protein, putative                                           | -2.93 | 0.72    | 0.06    |
| PF3D7_1420900   | mannose-1-phosphate guanylyltransferase, putative                             | 0.27  | 12.65   | 13.72   |
| PF3D7_1421000   | conserved Plasmodium protein, unknown function                                | 0.23  | 13.59   | 14.36   |
| PF3D7_1421100   | conserved Plasmodium protein, unknown function                                | -0.38 | 25.71   | 17.86   |
| PF3D7_1421150   | C/D small nucleolar RNA                                                       | 3.29  | 6.01    | 54.10   |
| PF3D7_1421200   | 40S ribosomal protein S25 (RPS25)                                             | 0.38  | 996.78  | 1172.29 |
| PF3D7_1421300   | conserved Plasmodium protein, unknown function                                | 0.72  | 2.48    | 3.68    |
| PF3D7_1421400   | DNA-directed RNA polymerase III subunit C, putative                           | -0.57 | 66.24   | 40.38   |
| PF3D7_1421500   | mitochondrial import inner membrane translocase subunit TIM8, putative (TIM8) | -0.41 | 16.24   | 11.04   |
| PF3D7_1421600   | conserved Plasmodium protein, unknown function                                | -1.06 | 36.62   | 15.88   |
| PF3D7_1421700   | unspecified product                                                           | -1.70 | 7.35    | 1.95    |
| PF3D7_1421800   | conserved Plasmodium protein, unknown function                                | 2.76  | 1.41    | 8.67    |
| PF3D7_1421900   | copper transporter, putative                                                  | 0.08  | 59.18   | 56.50   |

|                 |                                                                |       |         |         |
|-----------------|----------------------------------------------------------------|-------|---------|---------|
| PF3D7_1422000   | conserved Plasmodium protein, unknown function                 | 0.67  | 7.07    | 10.21   |
| PF3D7_1422100   | mitochondrial ribosomal protein L21 precursor, putative        | -0.05 | 23.36   | 20.41   |
| PF3D7_1422200   | conserved Plasmodium protein, unknown function                 | -0.50 | 13.19   | 8.41    |
| PF3D7_1422300   | DnaJ protein, putative                                         | -0.53 | 12.96   | 8.09    |
| PF3D7_1422400   | conserved Plasmodium protein, unknown function                 | -0.93 | 35.57   | 16.84   |
| PF3D7_1422500   | ERAD-associated E3 ubiquitin-protein ligase HRD1 (HRD1)        | -0.11 | 16.32   | 13.60   |
| PF3D7_1422600   | conserved Plasmodium protein, unknown function                 | 0.76  | 9.97    | 15.22   |
| PF3D7_1422700   | conserved Plasmodium protein, unknown function                 | -0.82 | 55.15   | 28.13   |
| PF3D7_1422800   | actin-related protein, putative (ARP4a)                        | -0.85 | 21.51   | 10.77   |
| PF3D7_1422900   | 14-3-3 protein, putative                                       | 0.84  | 1.63    | 2.65    |
| PF3D7_1423000   | nucleolar GTP-binding protein 2, putative (NOG2)               | -0.21 | 127.88  | 99.73   |
| PF3D7_1423100   | ankyrin, putative                                              | 0.14  | 22.56   | 22.50   |
| PF3D7_1423200   | peptidyl-prolyl cis-trans isomerase (CYP52)                    | 0.16  | 48.84   | 49.24   |
| PF3D7_1423300   | serine/threonine protein phosphatase 7 (PP7)                   | 0.48  | 45.34   | 56.95   |
| PF3D7_1423400   | conserved Plasmodium membrane protein, unknown function        | -1.06 | 1.68    | 0.72    |
| PF3D7_1423500   | conserved Plasmodium protein, unknown function                 | -0.69 | 15.93   | 8.93    |
| PF3D7_1423600   | calcium-dependent protein kinase, putative                     | 0.46  | 18.89   | 23.49   |
| PF3D7_1423700   | conserved Plasmodium protein, unknown function                 | -0.55 | 267.48  | 164.31  |
| PF3D7_1423800   | vacuolar protein sorting-associated protein 3, putative (VPS3) | -0.94 | 58.22   | 27.32   |
| PF3D7_1423900   | small nucleolar RNA snoR23                                     | -2.40 | 2.87    | 0.27    |
| PF3D7_1424000   | small nucleolar RNA snoR24                                     | 0.19  | 0.00    | 0.00    |
| PF3D7_1424100   | 60S ribosomal protein L5, putative                             | -0.23 | 2058.11 | 1580.88 |
| PF3D7_1424200   | small nucleolar RNA snoR25                                     | 1.05  | 164.59  | 306.73  |
| PF3D7_1424300   | small nucleolar RNA snoR26                                     | -0.56 | 8.40    | 5.04    |
| PF3D7_1424400   | 60S ribosomal protein L7-3, putative                           | 0.42  | 1192.39 | 1443.89 |
| PF3D7_1424500   | small nucleolar RNA snoR27                                     | 0.19  | 10.10   | 10.38   |
| PF3D7_1424600   | small nucleolar RNA snoR28                                     | -1.53 | 17.60   | 5.26    |
| PF3D7_1424700   | small nucleolar RNA snoR29                                     | 4.10  | 0.00    | 3.84    |
| PF3D7_1424800   | unspecified product                                            | -0.81 | 0.57    | 0.20    |
| PF3D7_1424900   | small nucleolar RNA snoR30                                     | -0.66 | 2.39    | 1.23    |
| PF3D7_1425000   | Plasmodium RNA of unknown function RUF4                        | 0.87  | 1.17    | 2.01    |
| PF3D7_1425100   | small nucleolar RNA snoR31                                     | 0.19  | 0.18    | 0.18    |
| PF3D7_1425200   | enoyl-CoA hydratase, putative                                  | 0.21  | 4.09    | 4.28    |
| PF3D7_1425300   | conserved Plasmodium protein, unknown function                 | 0.80  | 23.64   | 37.26   |
| PF3D7_1425400   | DEAD/DEAH box helicase, putative                               | 1.01  | 7.76    | 14.07   |
| PF3D7_1425500   | conserved Plasmodium protein, unknown function                 | -0.75 | 3.14    | 1.66    |
| PF3D7_1425600   | zinc finger protein, putative                                  | 1.05  | 0.77    | 1.43    |
| PF3D7_1425700   | conserved Plasmodium protein, unknown function                 | -0.76 | 29.62   | 15.82   |
| PF3D7_1425800   | conserved Plasmodium protein, unknown function                 | -0.13 | 6.20    | 5.10    |
| PF3D7_1425900   | conserved Plasmodium protein, unknown function                 | -1.75 | 114.47  | 30.75   |
| PF3D7_1426000   | 60S ribosomal protein L21 (RPL21)                              | -0.53 | 1359.00 | 852.02  |
| PF3D7_1426100   | basic transcription factor 3b, putative                        | -0.56 | 905.49  | 554.55  |
| PF3D7_1426200   | protein arginine N-methyltransferase 1 (PRMT1)                 | -0.30 | 178.77  | 130.56  |
| PF3D7_1426300   | dynein-associated protein, putative                            | 0.37  | 7.58    | 8.85    |
| PF3D7_1426400   | MORN repeat protein, putative                                  | 1.87  | 0.45    | 1.60    |
| PF3D7_1426500   | ABC transporter G family member 2 (ABCG2)                      | 0.44  | 1.98    | 2.42    |
| PF3D7_1426600   | conserved Plasmodium protein, unknown function                 | -0.13 | 2.82    | 2.33    |
| PF3D7_1426700   | phosphoenolpyruvate carboxylase (PEPC)                         | -0.97 | 129.86  | 59.65   |
| PF3D7_1426800   | conserved Plasmodium protein, unknown function                 | -0.90 | 45.80   | 22.09   |
| PF3D7_1426900   | ubiquinol-cytochrome c reductase hinge protein, putative       | 1.32  | 29.28   | 66.24   |
| PF3D7_1427000   | conserved Plasmodium protein, unknown function                 | -0.20 | 5.41    | 4.26    |
| PF3D7_1427100   | lipase, putative                                               | -0.50 | 231.70  | 148.25  |
| PF3D7_1427200   | selenoprotein (Sel4)                                           | 0.25  | 10.95   | 11.77   |
| PF3D7_1427300   | conserved Plasmodium protein, unknown function                 | -0.54 | 11.16   | 6.92    |
| PF3D7_1427400.1 | conserved Plasmodium membrane protein, unknown function        | -1.44 | 21.25   | 7.04    |
| PF3D7_1427400.2 | conserved Plasmodium membrane protein, unknown function        | -1.44 | 21.23   | 7.06    |
| PF3D7_1427500   | DNA mismatch repair protein MSH2, putative (MSH2-1)            | 0.61  | 9.91    | 13.66   |
| PF3D7_1427600   | CorA-like Mg <sup>2+</sup> transporter protein, putative       | 0.78  | 5.63    | 8.72    |
| PF3D7_1427700   | conserved Plasmodium protein, unknown function                 | 0.63  | 3.15    | 4.44    |
| PF3D7_1427800   | exosome complex exonuclease RRP41, putative (RRP41)            | -0.49 | 30.89   | 19.83   |
| PF3D7_1427900   | conserved protein, unknown function                            | 0.09  | 201.57  | 193.09  |
| PF3D7_1428000   | conserved Plasmodium membrane protein, unknown function        | -1.41 | 4.98    | 1.68    |
| PF3D7_1428100   | WW domain-binding protein 11, putative                         | -1.22 | 23.75   | 9.18    |
| PF3D7_1428200   | metabolite/drug transporter, putative                          | -1.00 | 88.30   | 39.75   |
| PF3D7_1428300   | proliferation-associated protein 2g4, putative                 | -0.38 | 345.52  | 240.09  |
| PF3D7_1428400   | WD and tetratricopeptide repeats protein 1, putative (WDTC1)   | 1.44  | 1.04    | 2.54    |
| PF3D7_1428500   | protein kinase, putative                                       | -0.58 | 13.50   | 8.15    |
| PF3D7_1428600   | peptide chain release factor 1, putative                       | 0.80  | 6.59    | 10.37   |
| PF3D7_1428700   | conserved protein, unknown function                            | -0.21 | 11.46   | 8.93    |
| PF3D7_1428800.1 | transcription initiation TFIID-like, putative                  | -0.80 | 35.41   | 18.29   |
| PF3D7_1428800.2 | transcription initiation TFIID-like, putative                  | -0.80 | 35.33   | 18.29   |
| PF3D7_1428900   | conserved Plasmodium protein, unknown function                 | 0.30  | 9.55    | 10.58   |
| PF3D7_1429000   | protein archease, putative                                     | -0.72 | 21.55   | 11.77   |
| PF3D7_1429100   | apicoplast ribosomal protein L15 precursor, putative           | 0.91  | 13.20   | 22.44   |
| PF3D7_1429200   | transcription factor with AP2 domain(s), putative (ApiAP2)     | 1.51  | 1.90    | 4.89    |
| PF3D7_1429300   | CPW-WPC family protein                                         | 0.88  | 14.57   | 24.25   |
| PF3D7_1429400   | rRNA (adenosine-2'-O)-methyltransferase, putative              | -1.07 | 25.47   | 10.95   |
| PF3D7_1429500   | diphthamide biosynthesis protein 2, putative (DPH2)            | -1.10 | 21.51   | 9.03    |
| PF3D7_1429600   | conserved Plasmodium protein, unknown function (GEXP03)        | 0.53  | 12.22   | 15.91   |
| PF3D7_1429700   | mitochondrial ribosomal protein L15 precursor, putative        | 0.15  | 49.56   | 49.70   |
| PF3D7_1429800   | coatamer beta subunit, putative                                | -0.90 | 159.92  | 77.37   |
| PF3D7_1429900   | ADP-dependent DNA helicase RecQ (WRN)                          | -2.88 | 15.87   | 1.94    |
| PF3D7_1430000   | conserved Plasmodium protein, unknown function                 | -0.62 | 11.92   | 7.00    |
| PF3D7_1430100   | serine/threonine protein phosphatase 2A activator (PTPA)       | 1.66  | 5.97    | 17.08   |
| PF3D7_1430200   | plasmepsin IX                                                  | 0.91  | 25.53   | 43.33   |
| PF3D7_1430300   | acid phosphatase, putative                                     | -0.13 | 73.44   | 60.51   |
| PF3D7_1430400   | autophagy protein 5, putative (ATG5)                           | -0.71 | 23.98   | 13.20   |
| PF3D7_1430500   | conserved Plasmodium protein, unknown function                 | -0.06 | 2.66    | 2.30    |
| PF3D7_1430600   | exodeoxyribonuclease III, putative                             | 0.66  | 1.98    | 2.83    |
| PF3D7_1430700   | NADP-specific glutamate dehydrogenase (GDH2)                   | 1.76  | 5.51    | 16.83   |
| PF3D7_1430800   | conserved Plasmodium protein, unknown function                 | 2.59  | 2.67    | 14.60   |
| PF3D7_1430900   | cytochrome c oxidase subunit 2, putative                       | 1.08  | 25.38   | 48.32   |
| PF3D7_1431000   | mitochondrial ribosomal protein L17-2 precursor, putative      | 1.30  | 8.25    | 18.39   |
| PF3D7_1431100   | conserved Plasmodium protein, unknown function                 | 2.63  | 3.71    | 20.76   |
| PF3D7_1431200   | conserved Plasmodium protein, unknown function                 | -1.21 | 62.69   | 24.43   |
| PF3D7_1431300   | large ribosomal subunit associated GTPase, putative            | -0.45 | 84.52   | 55.95   |
| PF3D7_1431400   | conserved Plasmodium protein, unknown function                 | 0.17  | 32.05   | 32.51   |
| PF3D7_1431500   | mitogen-activated protein kinase 1 (MAPK1)                     | 1.19  | 14.04   | 28.89   |

|                 |                                                                                 |       |         |         |
|-----------------|---------------------------------------------------------------------------------|-------|---------|---------|
| PF3D7_1431600   | ATP-specific succinyl-CoA synthetase beta subunit, putative                     | 0.76  | 14.53   | 22.28   |
| PF3D7_1431700   | 60S ribosomal protein L14, putative                                             | -0.31 | 538.85  | 392.85  |
| PF3D7_1431800   | apyrase, putative                                                               | -0.18 | 3.25    | 2.58    |
| PF3D7_1431900   | inner membrane complex suture component, putative (ISC3)                        | -0.95 | 8.76    | 4.09    |
| PF3D7_1432000   | syntaxin, Qa-SNARE family (SYN11)                                               | -0.49 | 8.78    | 5.63    |
| PF3D7_1432100   | voltage-dependent anion-selective channel protein, putative                     | -0.64 | 40.06   | 23.19   |
| PF3D7_1432200   | conserved Plasmodium protein, unknown function                                  | 0.34  | 6.28    | 7.16    |
| PF3D7_1432300   | conserved Plasmodium protein, unknown function                                  | -0.69 | 3.34    | 1.86    |
| PF3D7_1432400   | leucine-rich repeat protein (LRR5)                                              | 0.08  | 2.07    | 1.97    |
| PF3D7_1432500   | RNA methyltransferase, putative                                                 | -0.39 | 52.06   | 35.86   |
| PF3D7_1432600   | conserved Plasmodium protein, unknown function                                  | -1.32 | 11.10   | 4.00    |
| PF3D7_1432700   | protein-L-isoaspartate(D-aspartate) O-methyltransferase, putative               | 0.77  | 15.43   | 23.78   |
| PF3D7_1432800   | conserved Plasmodium protein, unknown function                                  | 0.13  | 15.36   | 15.20   |
| PF3D7_1432900   | SF-assemblin, putative                                                          | -0.87 | 27.35   | 13.45   |
| PF3D7_1433000   | H/ACA ribonucleoprotein complex subunit 3, putative (NOP10)                     | -0.48 | 26.93   | 17.41   |
| PF3D7_1433100   | conserved Plasmodium membrane protein, unknown function                         | -1.89 | 10.80   | 2.62    |
| PF3D7_1433200   | conserved Plasmodium protein, unknown function                                  | 0.71  | 0.54    | 0.79    |
| PF3D7_1433300   | chromatin assembly factor 1 P55 subunit, putative                               | -0.48 | 16.50   | 10.67   |
| PF3D7_1433400   | conserved Plasmodium membrane protein, unknown function                         | 0.00  | 40.89   | 37.01   |
| PF3D7_1433500   | DNA topoisomerase 2 (TOP2)                                                      | -0.79 | 332.08  | 173.06  |
| PF3D7_1433600   | microsomal signal peptidase protein, putative (SPC1)                            | 0.20  | 14.57   | 15.13   |
| PF3D7_1433700   | conserved Plasmodium protein, unknown function                                  | -0.57 | 3.51    | 2.14    |
| PF3D7_1433800   | conserved Plasmodium protein, unknown function                                  | 0.01  | 4.23    | 3.84    |
| PF3D7_1433900   | protein kinase, putative                                                        | -0.50 | 2.52    | 1.60    |
| PF3D7_1434000   | CCR4-associated factor 16, putative (CAF16)                                     | 0.01  | 41.21   | 37.34   |
| PF3D7_1434100   | queuine tRNA-ribosyltransferase, putative                                       | -1.16 | 29.66   | 11.95   |
| PF3D7_1434200   | calmodulin (CAM)                                                                | 0.32  | 353.52  | 396.83  |
| PF3D7_1434300   | Hsp70/Hsp90 organizing protein (HOP)                                            | 0.53  | 201.20  | 261.69  |
| PF3D7_1434400   | conserved Plasmodium membrane protein, unknown function                         | 0.97  | 20.36   | 36.02   |
| PF3D7_1434500   | dynein-related AAA-type ATPase, putative                                        | -0.64 | 37.45   | 21.62   |
| PF3D7_1434600   | methionine aminopeptidase 2 (METAP2)                                            | -0.03 | 202.08  | 178.57  |
| PF3D7_1434700   | mitochondrial import inner membrane translocase subunit TIM17, putative (TIM17) | 0.83  | 21.67   | 34.66   |
| PF3D7_1434800   | mitochondrial acidic protein MAM33, putative                                    | 1.23  | 35.33   | 74.70   |
| PF3D7_1434900   | conserved Plasmodium protein, unknown function                                  | 0.43  | 1.59    | 1.94    |
| PF3D7_1435000   | cytochrome c oxidase assembly protein, putative                                 | 0.42  | 13.18   | 15.94   |
| PF3D7_1435100   | ribonuclease H2 subunit B, putative                                             | 0.17  | 4.33    | 4.39    |
| PF3D7_1435200   | conserved Plasmodium protein, unknown function                                  | 0.10  | 21.36   | 20.60   |
| PF3D7_1435300   | NAD(P)H-dependent glutamate synthase, putative                                  | 1.24  | 17.32   | 37.03   |
| PF3D7_1435400   | ER membrane protein complex subunit 4, putative (EMC4)                          | -1.46 | 87.88   | 28.82   |
| PF3D7_1435500   | conserved Plasmodium protein, unknown function                                  | -0.92 | 45.82   | 21.86   |
| PF3D7_1435600   | conserved Plasmodium protein, unknown function                                  | 0.55  | 25.61   | 33.89   |
| PF3D7_1435700.1 | ataxin-2 like protein, putative                                                 | 1.30  | 14.55   | 32.24   |
| PF3D7_1435700.2 | ataxin-2 like protein, putative                                                 | 1.29  | 14.82   | 32.62   |
| PF3D7_1435800   | GTPase Era, putative (ERA)                                                      | 0.96  | 2.22    | 3.89    |
| PF3D7_1435900   | conserved Plasmodium protein, unknown function                                  | 0.07  | 3.09    | 2.93    |
| PF3D7_1436000   | glucose-6-phosphate isomerase (GPI)                                             | -0.91 | 226.06  | 108.60  |
| PF3D7_1436100   | conserved Plasmodium membrane protein, unknown function                         | -0.81 | 11.13   | 5.73    |
| PF3D7_1436200   | conserved Plasmodium protein, unknown function                                  | 0.38  | 17.84   | 20.90   |
| PF3D7_1436300   | translocon component PTEX150 (PTEX150)                                          | -1.13 | 763.36  | 315.04  |
| PF3D7_1436400   | conserved Plasmodium protein, unknown function                                  | -0.36 | 1.76    | 1.24    |
| PF3D7_1436500   | GTP-binding protein, putative                                                   | -0.05 | 4.13    | 3.61    |
| PF3D7_1436600   | cGMP-dependent protein kinase (PKG)                                             | -0.06 | 48.01   | 41.55   |
| PF3D7_1436700   | conserved Plasmodium protein, unknown function                                  | -0.98 | 3.10    | 1.41    |
| PF3D7_1436800   | ATP-dependent Clp protease proteolytic subunit (ClpR)                           | -0.14 | 5.49    | 4.48    |
| PF3D7_1436900   | histidine triad protein, putative                                               | -1.22 | 20.62   | 7.94    |
| PF3D7_1437000   | N-acetyltransferase, putative                                                   | -1.24 | 127.19  | 48.69   |
| PF3D7_1437100   | conserved Plasmodium protein, unknown function                                  | -0.29 | 6.06    | 4.44    |
| PF3D7_1437200   | ribonucleoside-diphosphate reductase, large subunit, putative                   | 0.47  | 103.68  | 129.29  |
| PF3D7_1437300   | conserved Plasmodium protein, unknown function                                  | -0.40 | 34.60   | 23.64   |
| PF3D7_1437400   | pantothenate kinase, putative                                                   | 0.57  | 9.34    | 12.48   |
| PF3D7_1437500   | conserved Plasmodium membrane protein, unknown function                         | -1.25 | 44.42   | 16.85   |
| PF3D7_1437600   | conserved Plasmodium protein, unknown function                                  | -0.09 | 0.71    | 0.60    |
| PF3D7_1437700   | succinyl-CoA ligase, putative                                                   | 0.68  | 10.07   | 14.53   |
| PF3D7_1437800   | trafficking protein particle complex subunit 5, putative (TRAPPC5)              | -0.20 | 54.69   | 42.91   |
| PF3D7_1437900   | HSP40, subfamily A, putative (ERdj3)                                            | 0.23  | 657.97  | 697.69  |
| PF3D7_1438000   | eukaryotic translation initiation factor eIF2A, putative                        | -0.99 | 287.38  | 130.86  |
| PF3D7_1438100   | secretory complex protein 62 (SEC62)                                            | -0.52 | 181.33  | 113.87  |
| PF3D7_1438200   | tRNA Selenocysteine                                                             | -0.34 | 2.56    | 1.75    |
| PF3D7_1438300   | tRNA Methionine                                                                 | 1.19  | 0.00    | 0.31    |
| PF3D7_1438400   | metacaspase-like protein (MCA2)                                                 | -0.19 | 21.00   | 16.66   |
| PF3D7_1438500   | cleavage and polyadenylation specificity factor, putative                       | -0.55 | 46.89   | 28.87   |
| PF3D7_1438600   | conserved protein, unknown function                                             | -1.12 | 52.24   | 21.59   |
| PF3D7_1438700   | DNA primase small subunit                                                       | 0.79  | 16.56   | 25.81   |
| PF3D7_1438800   | conserved Plasmodium protein, unknown function                                  | 1.93  | 3.21    | 11.09   |
| PF3D7_1438900   | thioredoxin peroxidase 1 (Trx-Px1)                                              | -0.23 | 570.24  | 439.26  |
| PF3D7_1439000   | copper transporter                                                              | -0.67 | 67.10   | 37.96   |
| PF3D7_1439100   | DEAD/DEAH box helicase, putative                                                | -0.92 | 19.91   | 9.49    |
| PF3D7_1439200   | conserved Plasmodium protein, unknown function                                  | -1.35 | 12.70   | 4.49    |
| PF3D7_1439300   | conserved Plasmodium protein, unknown function                                  | -1.02 | 28.26   | 12.57   |
| PF3D7_1439400   | ubiquinol-cytochrome c reductase iron-sulfur subunit, putative                  | 1.00  | 49.20   | 88.86   |
| PF3D7_1439500   | CCAAT-binding transcription factor, putative                                    | -0.02 | 19.68   | 17.57   |
| PF3D7_1439600   | conserved Plasmodium protein, unknown function                                  | 1.08  | 21.12   | 40.21   |
| PF3D7_1439700   | leucine carboxyl methyltransferase, putative                                    | 0.37  | 17.30   | 20.15   |
| PF3D7_1439800   | vesicle-associated membrane protein, putative                                   | -0.46 | 157.20  | 102.75  |
| PF3D7_1439900   | triosephosphate isomerase (TIM)                                                 | -0.23 | 547.76  | 422.80  |
| PF3D7_1440000   | conserved Plasmodium protein, unknown function                                  | -0.64 | 6.43    | 3.72    |
| PF3D7_1440100   | conserved Plasmodium protein, unknown function                                  | -0.58 | 35.90   | 21.72   |
| PF3D7_1440200   | stromal-processing peptidase, putative (SPP)                                    | -0.04 | 7.21    | 6.32    |
| PF3D7_1440300   | delta-aminolevulinic acid dehydratase (PBGs)                                    | 0.61  | 4.43    | 6.10    |
| PF3D7_1440400   | conserved Plasmodium protein, unknown function                                  | -0.26 | 8.82    | 6.62    |
| PF3D7_1440500   | allantoicase, putative                                                          | -0.23 | 14.37   | 11.04   |
| PF3D7_1440600   | conserved Plasmodium protein, unknown function                                  | 1.08  | 1.56    | 2.99    |
| PF3D7_1440700   | adaptor complexes medium subunit family                                         | -0.84 | 13.75   | 6.94    |
| PF3D7_1440800   | major facilitator superfamily, putative                                         | -1.39 | 10.17   | 3.50    |
| PF3D7_1440900   | conserved Plasmodium protein, unknown function                                  | -0.37 | 13.15   | 9.15    |
| PF3D7_1441000   | conserved Plasmodium protein, unknown function                                  | -0.73 | 30.09   | 16.40   |
| PF3D7_1441100   | conserved Plasmodium protein, unknown function                                  | 0.25  | 1884.32 | 2020.01 |
| PF3D7_1441200   | 60S ribosomal protein L1, putative                                              | -0.40 | 475.46  | 324.85  |

|               |                                                                     |       |         |         |
|---------------|---------------------------------------------------------------------|-------|---------|---------|
| PF3D7_1441300 | serine/threonine protein kinase, putative                           | -0.96 | 15.94   | 7.37    |
| PF3D7_1441400 | FACT complex subunit SSRP1, putative (FACT-S)                       | -0.28 | 47.70   | 35.54   |
| PF3D7_1441500 | conserved Plasmodium protein, unknown function                      | -0.55 | 18.19   | 11.20   |
| PF3D7_1441600 | acid cluster protein 33 homologue, putative                         | -0.79 | 9.03    | 4.70    |
| PF3D7_1441700 | metalloprotease, putative                                           | -0.24 | 1.76    | 1.34    |
| PF3D7_1441800 | vacuolar-sorting protein SNF7, putative                             | 0.84  | 7.86    | 12.72   |
| PF3D7_1441900 | RNA polymerase II transcription factor B subunit 5, putative (TFB5) | -0.34 | 25.47   | 18.18   |
| PF3D7_1442000 | ADP-ribosylation factor, putative                                   | 0.38  | 5.68    | 6.68    |
| PF3D7_1442100 | replication factor A protein 3, putative (RPA3)                     | 0.60  | 13.17   | 18.08   |
| PF3D7_1442200 | GTP-binding protein, putative                                       | 0.66  | 6.45    | 9.22    |
| PF3D7_1442300 | tRNA binding protein, putative                                      | -0.17 | 269.54  | 216.78  |
| PF3D7_1442400 | conserved Plasmodium protein, unknown function                      | 0.16  | 13.44   | 13.51   |
| PF3D7_1442500 | protein prenyltransferase alpha subunit, putative                   | 0.09  | 4.05    | 3.88    |
| PF3D7_1442600 | TRAP-like protein (TREP)                                            | 2.39  | 0.96    | 4.59    |
| PF3D7_1442700 | conserved Plasmodium protein, unknown function                      | -0.04 | 4.20    | 3.68    |
| PF3D7_1442800 | conserved Plasmodium protein, unknown function                      | -1.03 | 3.98    | 1.75    |
| PF3D7_1442900 | protein transport protein SEC7, putative (SEC7)                     | -0.42 | 131.78  | 88.65   |
| PF3D7_1443000 | serine/threonine protein kinase (SRPK2)                             | 0.35  | 6.68    | 7.68    |
| PF3D7_1443100 | conserved Plasmodium protein, unknown function                      | 0.20  | 44.05   | 45.78   |
| PF3D7_1443200 | conserved Plasmodium protein, unknown function                      | 0.18  | 4.48    | 4.56    |
| PF3D7_1443300 | U6 snRNA-associated Sm-like protein LSM5, putative (LSM5)           | -0.86 | 143.26  | 71.27   |
| PF3D7_1443400 | WD repeat-containing protein, putative                              | 0.24  | 16.53   | 17.67   |
| PF3D7_1443500 | poly(A)-specific ribonuclease PARN, putative (PARN)                 | 0.60  | 3.15    | 4.30    |
| PF3D7_1443600 | conserved Plasmodium protein, unknown function                      | -0.60 | 3.16    | 1.88    |
| PF3D7_1443700 | dephospho-CoA kinase, putative (DPCK)                               | -0.47 | 8.53    | 5.53    |
| PF3D7_1443800 | zinc finger protein, putative                                       | -0.01 | 39.82   | 35.74   |
| PF3D7_1443900 | heat shock protein 90, putative (HSP90)                             | -0.02 | 31.38   | 27.83   |
| PF3D7_1444000 | conserved Plasmodium protein, unknown function                      | -2.23 | 0.49    | 0.07    |
| PF3D7_1444100 | conserved Plasmodium protein, unknown function                      | 0.91  | 1.66    | 2.81    |
| PF3D7_1444200 | calmodulin-like protein                                             | 0.32  | 6.78    | 7.64    |
| PF3D7_1444300 | 1-acyl-sn-glycerol-3-phosphate acyltransferase, putative (LPAAT)    | 0.41  | 68.22   | 81.59   |
| PF3D7_1444400 | conserved Plasmodium protein, unknown function                      | -1.88 | 13.76   | 3.37    |
| PF3D7_1444500 | eukaryotic initiation factor 2alpha kinase 1 (IK1)                  | -1.17 | 44.67   | 17.89   |
| PF3D7_1444600 | conserved Plasmodium protein, unknown function                      | 0.65  | 6.06    | 8.62    |
| PF3D7_1444700 | conserved Plasmodium protein, unknown function                      | 0.23  | 8.90    | 9.44    |
| PF3D7_1444800 | fructose-bisphosphate aldolase (FBPA)                               | 0.69  | 991.94  | 1443.28 |
| PF3D7_1444900 | conserved Plasmodium protein, unknown function                      | -0.92 | 2.93    | 1.38    |
| PF3D7_1445000 | conserved Plasmodium protein, unknown function                      | -1.19 | 10.40   | 4.11    |
| PF3D7_1445100 | histidine-tRNA ligase, putative                                     | -1.84 | 108.20  | 27.17   |
| PF3D7_1445200 | RNA helicase, putative                                              | -0.31 | 124.30  | 90.71   |
| PF3D7_1445300 | mitochondrial ribosomal protein S29 precursor, putative             | -0.56 | 11.96   | 7.30    |
| PF3D7_1445400 | protein serine/threonine kinase-1 (CLK1)                            | -0.11 | 176.21  | 147.72  |
| PF3D7_1445500 | conserved Plasmodium protein, unknown function                      | -0.85 | 131.91  | 65.97   |
| PF3D7_1445600 | RNA-binding protein, putative                                       | -0.77 | 210.89  | 111.95  |
| PF3D7_1445700 | conserved Plasmodium protein, unknown function                      | -0.01 | 285.28  | 254.84  |
| PF3D7_1445800 | conserved Plasmodium membrane protein, unknown function             | -0.29 | 2.52    | 1.86    |
| PF3D7_1445900 | ATP-dependent RNA helicase DDX5, putative (DDX5)                    | -0.26 | 556.77  | 420.36  |
| PF3D7_1446000 | U5 spliceosomal RNA                                                 | 4.65  | 0.19    | 8.46    |
| PF3D7_1446100 | conserved Plasmodium protein, unknown function                      | -0.28 | 2.95    | 2.19    |
| PF3D7_1446200 | M17 leucyl aminopeptidase (LAP)                                     | -0.78 | 539.58  | 282.54  |
| PF3D7_1446300 | conserved Plasmodium membrane protein, unknown function             | -0.70 | 18.47   | 10.26   |
| PF3D7_1446400 | pyruvate dehydrogenase E1 component subunit beta (pdhB)             | 1.08  | 6.62    | 12.66   |
| PF3D7_1446500 | conserved Plasmodium protein, unknown function                      | -0.79 | 81.06   | 42.23   |
| PF3D7_1446600 | centrin-2 (CEN2)                                                    | 0.81  | 79.00   | 124.74  |
| PF3D7_1446700 | conserved Plasmodium protein, unknown function                      | 0.51  | 28.09   | 36.00   |
| PF3D7_1446800 | heme detoxification protein (HDP)                                   | 1.13  | 9.46    | 18.67   |
| PF3D7_1446900 | glutaminyl-peptide cyclotransferase, putative                       | -0.56 | 77.29   | 47.18   |
| PF3D7_1447000 | 40S ribosomal protein S5                                            | 0.12  | 1778.24 | 1748.15 |
| PF3D7_1447100 | conserved Plasmodium protein, unknown function                      | 0.24  | 97.73   | 104.24  |
| PF3D7_1447200 | conserved Plasmodium protein, unknown function                      | -0.02 | 167.24  | 148.65  |
| PF3D7_1447300 | mitochondrial ribosomal protein S14 precursor, putative             | 0.30  | 7.93    | 8.83    |
| PF3D7_1447400 | conserved Plasmodium protein, unknown function                      | -1.62 | 31.39   | 9.19    |
| PF3D7_1447500 | inner membrane complex protein, putative (IMC20)                    | 1.45  | 2.01    | 5.03    |
| PF3D7_1447600 | conserved Plasmodium protein, unknown function                      | 1.19  | 0.55    | 1.20    |
| PF3D7_1447700 | conserved Plasmodium protein, unknown function                      | -1.01 | 15.37   | 6.89    |
| PF3D7_1447800 | calponin homology domain-containing protein, putative               | -0.77 | 15.76   | 8.35    |
| PF3D7_1447900 | multidrug resistance protein 2 (MDR2)                               | -0.02 | 20.35   | 18.07   |
| PF3D7_1448000 | U3 small nucleolar RNA-associated protein 12, putative (UTP12)      | -1.01 | 83.31   | 37.21   |
| PF3D7_1448100 | conserved Plasmodium protein, unknown function                      | -2.66 | 16.19   | 2.27    |
| PF3D7_1448200 | conserved Plasmodium protein, unknown function                      | -0.06 | 0.55    | 0.48    |
| PF3D7_1448300 | conserved Plasmodium protein, unknown function                      | -0.60 | 56.94   | 33.98   |
| PF3D7_1448400 | ubiquitin-protein ligase, putative (HRD3)                           | -0.16 | 17.05   | 13.73   |
| PF3D7_1448500 | conserved Plasmodium protein, unknown function                      | 0.51  | 13.59   | 17.40   |
| PF3D7_1448600 | SNARE protein, putative (VT11)                                      | 0.15  | 45.50   | 45.61   |
| PF3D7_1448700 | conserved Plasmodium protein, unknown function                      | -0.69 | 24.46   | 13.70   |
| PF3D7_1448800 | Appr-1-p processing domain protein                                  | -0.34 | 20.24   | 14.40   |
| PF3D7_1448900 | conserved Plasmodium protein, unknown function                      | 1.44  | 1.67    | 4.24    |
| PF3D7_1449000 | gamete egress and sporozoite traversal protein, putative (GEST)     | 2.47  | 1.77    | 8.94    |
| PF3D7_1449100 | conserved Plasmodium protein, unknown function                      | 0.15  | 21.30   | 21.29   |
| PF3D7_1449200 | conserved Plasmodium protein, unknown function                      | 0.55  | 264.46  | 348.31  |
| PF3D7_1449300 | transcription factor IIb subunit, putative                          | -0.45 | 98.69   | 65.17   |
| PF3D7_1449400 | crossover junction endonuclease MUS81, putative (MUS81)             | 0.72  | 7.18    | 10.66   |
| PF3D7_1449500 | transcription factor with AP2 domain(s), putative (ApiAP2)          | -0.48 | 33.96   | 21.90   |
| PF3D7_1449600 | conserved Plasmodium protein, unknown function                      | -0.77 | 19.01   | 10.08   |
| PF3D7_1449700 | exosome complex exonuclease RRP6 (RRP6)                             | -1.31 | 24.43   | 8.91    |
| PF3D7_1449800 | conserved Plasmodium protein, unknown function                      | -0.11 | 36.87   | 30.75   |
| PF3D7_1449900 | conserved Plasmodium protein, unknown function                      | -1.49 | 15.50   | 4.95    |
| PF3D7_1450000 | serine/threonine protein kinase, putative                           | -1.19 | 44.80   | 17.70   |
| PF3D7_1450100 | signal recognition particle subunit SRP54 (SRP54)                   | -0.76 | 236.71  | 126.12  |
| PF3D7_1450200 | conserved Plasmodium protein, unknown function                      | -1.57 | 24.93   | 7.56    |
| PF3D7_1450300 | NADPH-cytochrome P450 reductase, putative (CPR)                     | -1.45 | 48.19   | 15.93   |
| PF3D7_1450400 | zinc finger protein, putative                                       | -0.80 | 63.22   | 32.75   |
| PF3D7_1450500 | conserved Plasmodium protein, unknown function                      | 0.75  | 7.43    | 11.26   |
| PF3D7_1450600 | S-adenosylmethionine-dependent methyltransferase, putative          | -1.09 | 54.98   | 23.25   |
| PF3D7_1450700 | conserved Plasmodium protein, unknown function                      | 0.60  | 59.71   | 81.46   |
| PF3D7_1450800 | conserved Plasmodium protein, unknown function                      | 0.27  | 2.49    | 2.71    |
| PF3D7_1450900 | acetyl-CoA acetyltransferase, putative                              | 0.85  | 3.57    | 5.83    |
| PF3D7_1451000 | conserved Plasmodium protein, unknown function                      | -0.26 | 23.49   | 17.76   |

|                 |                                                                      |       |         |         |
|-----------------|----------------------------------------------------------------------|-------|---------|---------|
| PF3D7_1451100   | elongation factor 2 (eEF2)                                           | -0.19 | 1905.71 | 1503.72 |
| PF3D7_1451200   | conserved Plasmodium protein, unknown function                       | -0.26 | 533.19  | 401.51  |
| PF3D7_1451300   | E3 SUMO-protein ligase NSE2, putative (NSE2)                         | 0.90  | 20.61   | 34.68   |
| PF3D7_1451400   | transcriptional regulatory protein sir2b (Sir2B)                     | -1.01 | 17.52   | 7.84    |
| PF3D7_1451500   | pre-mRNA-splicing factor CWF18, putative                             | -0.55 | 29.56   | 18.26   |
| PF3D7_1451600   | LCCL domain-containing protein (LAP5)                                | 1.38  | 0.56    | 1.33    |
| PF3D7_1451700   | calcineurin subunit B (CNB)                                          | 1.07  | 21.48   | 40.76   |
| PF3D7_1451800   | sortilin                                                             | 0.36  | 56.73   | 65.55   |
| PF3D7_1451900   | ribosome biogenesis protein TSR1, putative (TSR1)                    | -0.64 | 74.06   | 42.76   |
| PF3D7_1452000   | rhoptry neck protein 2 (RON2)                                        | -0.71 | 61.87   | 34.03   |
| PF3D7_1452100   | leucine-rich repeat protein (LRR3)                                   | -1.82 | 11.39   | 2.90    |
| PF3D7_1452200   | aminomethyltransferase, putative                                     | -0.07 | 1.74    | 1.49    |
| PF3D7_1452300   | DER1-like protein (Der1-1)                                           | 0.01  | 3.09    | 2.81    |
| PF3D7_1452400   | conserved Plasmodium protein, unknown function                       | -0.40 | 116.90  | 79.68   |
| PF3D7_1452500   | SNARE protein, putative (BET1)                                       | -0.01 | 11.09   | 9.96    |
| PF3D7_1452600   | conserved Plasmodium protein, unknown function                       | -1.11 | 15.59   | 6.54    |
| PF3D7_1452700   | U1 snRNA associated protein, putative                                | 1.29  | 19.90   | 43.78   |
| PF3D7_1452800   | conserved Plasmodium protein, unknown function                       | 0.13  | 2.24    | 2.21    |
| PF3D7_1452900   | conserved Plasmodium protein, unknown function                       | 0.68  | 4.04    | 5.87    |
| PF3D7_1453000   | conserved Plasmodium protein, unknown function                       | -1.18 | 31.82   | 12.66   |
| PF3D7_1453100   | dynactin subunit 4, putative                                         | 0.02  | 1.67    | 1.52    |
| PF3D7_1453200   | conserved Plasmodium protein, unknown function                       | 0.02  | 6.14    | 5.62    |
| PF3D7_1453300   | conserved protein, unknown function                                  | -3.13 | 1.84    | 0.10    |
| PF3D7_1453400   | conserved Plasmodium protein, unknown function                       | -1.76 | 16.26   | 4.32    |
| PF3D7_1453500   | pyridine nucleotide transhydrogenase, putative                       | 0.18  | 1.22    | 1.25    |
| PF3D7_1453600   | RAP protein, putative                                                | 0.16  | 1.99    | 2.01    |
| PF3D7_1453700   | co-chaperone p23 (P23)                                               | 0.88  | 938.68  | 1555.08 |
| PF3D7_1453800   | glucose-6-phosphate dehydrogenase-6-phosphogluconolactonase (GluPho) | -0.71 | 123.81  | 68.33   |
| PF3D7_1453900   | conserved Plasmodium protein, unknown function                       | -1.11 | 100.51  | 41.89   |
| PF3D7_1454000   | RNA-binding protein, putative                                        | 0.28  | 27.11   | 29.61   |
| PF3D7_1454100   | tRNA intron endonuclease, putative                                   | -0.60 | 3.73    | 2.19    |
| PF3D7_1454200   | conserved Plasmodium protein, unknown function                       | -1.82 | 35.13   | 8.97    |
| PF3D7_1454300   | serine/threonine protein kinase KIN (KIN)                            | -1.20 | 6.74    | 2.64    |
| PF3D7_1454400   | aminopeptidase P (APP)                                               | -1.17 | 271.76  | 109.01  |
| PF3D7_1454500   | nifU protein, putative (IscU1)                                       | -0.07 | 155.79  | 133.89  |
| PF3D7_1454600   | mitochondrial ribosomal protein S11 precursor, putative              | 0.40  | 21.00   | 24.93   |
| PF3D7_1454700   | 6-phosphogluconate dehydrogenase, decarboxylating, putative          | -0.59 | 193.73  | 116.00  |
| PF3D7_1454800   | conserved Plasmodium protein, unknown function                       | -1.86 | 3.71    | 0.88    |
| PF3D7_1454900   | conserved Plasmodium protein, unknown function                       | 1.74  | 0.77    | 2.43    |
| PF3D7_1455000   | protein phosphatase PPM3, putative (PPM3)                            | 0.75  | 2.29    | 3.47    |
| PF3D7_1455100   | protein tyrosine phosphatase, putative (PTP1)                        | -0.74 | 67.63   | 36.51   |
| PF3D7_1455200.1 | methyltransferase, putative                                          | 0.91  | 6.74    | 11.44   |
| PF3D7_1455200.2 | methyltransferase, putative                                          | 0.91  | 6.77    | 11.50   |
| PF3D7_1455300   | conserved Plasmodium protein, unknown function                       | 1.20  | 20.08   | 41.73   |
| PF3D7_1455400   | hemolysin III (HlyIII)                                               | -1.20 | 115.93  | 45.52   |
| PF3D7_1455500   | AP-1 complex subunit gamma, putative                                 | -0.59 | 33.23   | 19.85   |
| PF3D7_1455600   | ferlin, putative                                                     | 0.16  | 5.17    | 5.21    |
| PF3D7_1455700   | conserved Plasmodium protein, unknown function                       | 0.46  | 7.79    | 9.67    |
| PF3D7_1455800   | LCCL domain-containing protein (CCp2)                                | 1.54  | 0.59    | 1.56    |
| PF3D7_1455900   | polyprenol reductase, putative                                       | 0.60  | 6.94    | 9.48    |
| PF3D7_1456000   | transcription factor with AP2 domain(s) (ApiAP2)                     | 0.26  | 9.18    | 9.93    |
| PF3D7_1456100   | serine hydroxymethyltransferase, putative (SHMT)                     | 1.15  | 0.32    | 0.66    |
| PF3D7_1456200   | conserved Plasmodium protein, unknown function                       | 1.62  | 0.55    | 1.53    |
| PF3D7_1456300   | conserved Plasmodium protein, unknown function                       | -2.10 | 12.83   | 2.69    |
| PF3D7_1456400   | conserved Plasmodium protein, unknown function                       | 1.45  | 0.56    | 1.39    |
| PF3D7_1456500   | conserved Plasmodium protein, unknown function                       | 0.42  | 8.31    | 10.01   |
| PF3D7_1456600   | mitochondrial ribosomal protein L28 precursor, putative              | 0.93  | 3.28    | 5.66    |
| PF3D7_1456700   | conserved Plasmodium protein, unknown function                       | -0.63 | 69.95   | 40.75   |
| PF3D7_1456800   | V-type H(+)-translocating pyrophosphatase, putative (VP1)            | -1.31 | 722.27  | 262.35  |
| PF3D7_1456900   | conserved protein, unknown function                                  | -0.31 | 80.77   | 58.82   |
| PF3D7_1457000   | signal peptide peptidase (SPP)                                       | -0.41 | 231.81  | 157.55  |
| PF3D7_1457100   | conserved Plasmodium protein, unknown function                       | -0.97 | 27.12   | 12.47   |
| PF3D7_1457200   | thioredoxin 1 (TRX1)                                                 | 0.31  | 237.37  | 265.91  |
| PF3D7_1457300   | conserved Plasmodium protein, unknown function                       | -1.07 | 207.28  | 88.92   |
| PF3D7_1457400   | conserved Plasmodium protein, unknown function                       | -1.38 | 19.19   | 6.65    |
| PF3D7_1457500   | vacuolar protein sorting-associated protein 4 (VPS4)                 | 0.55  | 13.58   | 17.95   |
| PF3D7_1457600   | conserved Plasmodium protein, unknown function                       | -1.21 | 40.30   | 15.67   |
| PF3D7_1457700   | large ribosomal subunit nuclear export factor, putative              | -1.09 | 68.94   | 29.29   |
| PF3D7_1457800   | conserved Plasmodium protein, unknown function                       | 0.30  | 5.48    | 6.09    |
| PF3D7_1457900   | conserved Plasmodium protein, unknown function                       | -0.72 | 17.81   | 9.75    |
| PF3D7_1458000   | cysteine proteinase falcipain 1 (FP1)                                | -1.09 | 206.65  | 87.53   |
| PF3D7_1458100   | protein PET117, putative (PET117)                                    | 0.72  | 7.34    | 10.93   |
| PF3D7_1458200   | conserved Plasmodium protein, unknown function                       | -0.44 | 21.86   | 14.52   |
| PF3D7_1458300   | conserved Plasmodium protein, unknown function                       | -0.39 | 14.89   | 10.23   |
| PF3D7_1458400   | aminodeoxychorismate lyase (ADCL)                                    | -0.36 | 16.63   | 11.72   |
| PF3D7_1458500   | spindle assembly abnormal protein 4, putative (SAS4)                 | 0.27  | 8.09    | 8.77    |
| PF3D7_1458600   | conserved Plasmodium protein, unknown function                       | -0.32 | 27.15   | 19.65   |
| PF3D7_1458700   | exonuclease V, mitochondrial, putative                               | 0.36  | 15.63   | 18.09   |
| PF3D7_1458800   | conserved Plasmodium protein, unknown function                       | -1.87 | 21.50   | 5.30    |
| PF3D7_1458900   | golgi apparatus membrane protein TVP23, putative (TVP23)             | -1.16 | 28.70   | 11.60   |
| PF3D7_1459000   | ATP-dependent RNA helicase DBP5 (DBP5)                               | -0.17 | 374.40  | 300.12  |
| PF3D7_1459100   | GTP-binding protein, putative                                        | -0.42 | 3.71    | 2.50    |
| PF3D7_1459200   | WD repeat-containing protein, putative                               | -0.31 | 33.62   | 24.46   |
| PF3D7_1459300   | OPA3-like protein, putative                                          | -1.48 | 16.74   | 5.37    |
| PF3D7_1459400   | conserved Plasmodium protein, unknown function                       | -1.67 | 180.82  | 51.33   |
| PF3D7_1459500   | conserved Plasmodium protein, unknown function                       | -0.27 | 0.98    | 0.73    |
| PF3D7_1459600   | conserved Plasmodium protein, unknown function                       | -0.51 | 86.68   | 54.82   |
| PF3D7_1459700   | pyridoxal 5'-phosphate synthase, putative                            | 1.27  | 6.61    | 14.45   |
| PF3D7_1459800   | bax inhibitor 1, putative                                            | 0.14  | 68.94   | 68.30   |
| PF3D7_1459900   | conserved Plasmodium membrane protein, unknown function              | 0.34  | 9.78    | 11.16   |
| PF3D7_1460000   | biotin protein ligase, putative                                      | 2.28  | 0.35    | 1.63    |
| PF3D7_1460100   | FYVE and coiled-coil domain-containing protein (FCP)                 | -0.95 | 38.13   | 17.85   |
| PF3D7_1460200   | conserved Plasmodium protein, unknown function                       | 0.06  | 7.01    | 6.60    |
| PF3D7_1460300   | 60S ribosomal protein L29, putative                                  | -1.14 | 212.14  | 87.04   |
| PF3D7_1460400   | ubiquitin carboxyl-terminal hydrolase isozyme L3 (UCHL3)             | -0.17 | 40.06   | 32.12   |
| PF3D7_1460500   | conserved Plasmodium protein, unknown function                       | 0.40  | 10.85   | 12.90   |
| PF3D7_1460600   | inner membrane complex sub-compartment protein 3 (ISP3)              | 0.48  | 8.97    | 11.33   |
| PF3D7_1460700   | 60S ribosomal protein L27 (RPL27)                                    | -0.25 | 1364.60 | 1036.66 |

|                 |                                                                      |       |         |         |
|-----------------|----------------------------------------------------------------------|-------|---------|---------|
| PF3D7_1460800   | snRNA-activating protein complex subunit 3, putative                 | 0.74  | 2.91    | 4.38    |
| PF3D7_1460900.1 | apicoplast ribosomal protein S10, putative (ARPS10)                  | 0.59  | 5.75    | 7.82    |
| PF3D7_1460900.2 | apicoplast ribosomal protein S10, putative (ARPS10)                  | 0.63  | 5.67    | 7.96    |
| PF3D7_1461000   | conserved Plasmodium protein, unknown function                       | 0.28  | 1.31    | 1.44    |
| PF3D7_1461100   | conserved Plasmodium protein, unknown function                       | -0.92 | 8.35    | 3.99    |
| PF3D7_1461200   | U3 small nucleolar ribonucleoprotein protein IMP3, putative (IMP3)   | -0.87 | 82.54   | 40.72   |
| PF3D7_1461300   | 40S ribosomal protein S28c, putative                                 | -0.10 | 268.03  | 225.90  |
| PF3D7_1461400   | conserved Plasmodium protein, unknown function                       | 0.29  | 54.05   | 59.46   |
| PF3D7_1461500   | meiotic nuclear division protein 1, putative (MND1)                  | -0.44 | 1.71    | 1.12    |
| PF3D7_1461600   | splicing factor 3B subunit 2, putative (SF3B2)                       | 0.20  | 131.17  | 135.67  |
| PF3D7_1461700   | conserved Plasmodium protein, unknown function                       | 2.09  | 2.65    | 10.34   |
| PF3D7_1461800   | conserved Plasmodium protein, unknown function                       | 1.92  | 6.08    | 20.77   |
| PF3D7_1461900   | valine--tRNA ligase, putative                                        | -0.26 | 131.93  | 99.40   |
| PF3D7_1462000   | thioredoxin-like protein (TLP1)                                      | -0.94 | 1.41    | 0.63    |
| PF3D7_1462100   | conserved Plasmodium protein, unknown function                       | -0.37 | 2.51    | 1.75    |
| PF3D7_1462200   | conserved Plasmodium protein, unknown function                       | 2.10  | 3.94    | 15.56   |
| PF3D7_1462300   | conserved Plasmodium protein, unknown function                       | -1.20 | 156.38  | 61.55   |
| PF3D7_1462400   | conserved Plasmodium protein, unknown function                       | -1.01 | 90.96   | 40.62   |
| PF3D7_1462500   | conserved Plasmodium protein, unknown function                       | 1.01  | 0.21    | 0.38    |
| PF3D7_1462600   | conserved Plasmodium membrane protein, unknown function              | 2.39  | 0.06    | 0.32    |
| PF3D7_1462700   | cytochrome c1 precursor, putative                                    | 0.71  | 32.93   | 48.63   |
| PF3D7_1462800   | glyceraldehyde-3-phosphate dehydrogenase (GAPDH)                     | 0.36  | 5993.56 | 6942.47 |
| PF3D7_1462900   | conserved Plasmodium protein, unknown function                       | -1.87 | 13.27   | 3.28    |
| PF3D7_1463000   | conserved Plasmodium protein, unknown function                       | -1.47 | 20.13   | 6.56    |
| PF3D7_1463100   | conserved Plasmodium protein, unknown function, pseudogene           | 1.51  | 0.02    | 0.08    |
| PF3D7_1463200   | replication factor C subunit 3, putative (RFC3)                      | 1.02  | 25.86   | 47.46   |
| PF3D7_1463300   | DNA polymerase alpha subunit, putative                               | -0.26 | 5.67    | 4.28    |
| PF3D7_1463400   | DNA-directed RNA polymerase III subunit RPC4, putative               | -0.45 | 87.65   | 57.88   |
| PF3D7_1463500   | fam-a protein                                                        | 0.26  | 78.96   | 85.39   |
| PF3D7_1463600   | conserved Plasmodium protein, unknown function                       | -1.25 | 1.72    | 0.59    |
| PF3D7_1463700   | cyclin homologue (CYC1)                                              | -0.99 | 28.22   | 12.79   |
| PF3D7_1463800   | mitochondrial ribosomal protein S6-2 precursor, putative             | -0.94 | 4.26    | 1.97    |
| PF3D7_1463900   | conserved Plasmodium membrane protein, unknown function              | -0.25 | 50.77   | 38.56   |
| PF3D7_1464000   | YL1 nuclear protein, putative                                        | -0.06 | 104.93  | 91.11   |
| PF3D7_1464100   | conserved Plasmodium protein, unknown function                       | -1.30 | 1.78    | 0.65    |
| PF3D7_1464200   | zinc finger protein, putative                                        | -0.49 | 25.14   | 16.19   |
| PF3D7_1464300   | conserved Plasmodium protein, unknown function                       | -1.07 | 2.60    | 1.11    |
| PF3D7_1464400   | zinc finger protein, putative                                        | 0.44  | 56.25   | 68.87   |
| PF3D7_1464500   | conserved Plasmodium membrane protein, unknown function              | -0.10 | 14.76   | 12.40   |
| PF3D7_1464600   | phosphatase, putative                                                | -0.20 | 206.84  | 163.02  |
| PF3D7_1464700   | ATP synthase (C/AC39) subunit, putative                              | -0.55 | 112.91  | 69.63   |
| PF3D7_1464800   | conserved Plasmodium protein, unknown function                       | 1.19  | 0.00    | 0.06    |
| PF3D7_1464900   | ATP-dependent zinc metalloprotease FTSH, putative                    | -0.18 | 138.05  | 109.97  |
| PF3D7_1465000   | conserved Plasmodium protein, unknown function                       | 0.81  | 26.17   | 41.30   |
| PF3D7_1465100   | conserved Plasmodium protein, unknown function                       | -0.32 | 4.94    | 3.56    |
| PF3D7_1465200   | conserved Plasmodium protein, unknown function                       | -0.51 | 61.02   | 38.63   |
| PF3D7_1465300   | tRNA 3'-trailer sequence RNase, putative                             | -0.47 | 34.58   | 22.51   |
| PF3D7_1465400   | conserved Plasmodium protein, unknown function                       | 0.40  | 129.89  | 155.05  |
| PF3D7_1465500   | potassium channel (K2)                                               | -0.93 | 1.00    | 0.47    |
| PF3D7_1465600   | conserved Plasmodium protein, unknown function                       | -0.16 | 4.22    | 3.41    |
| PF3D7_1465700   | plasmepsin VIII                                                      | 0.83  | 0.43    | 0.70    |
| PF3D7_1465800   | dynein beta chain, putative                                          | 0.67  | 0.71    | 1.02    |
| PF3D7_1465900   | 40S ribosomal protein S3                                             | 0.15  | 1398.73 | 1401.06 |
| PF3D7_1466000   | conserved Plasmodium protein, unknown function                       | 0.61  | 0.88    | 1.22    |
| PF3D7_1466100   | protein phosphatase containing kelch-like domains (PPKL)             | -0.08 | 7.18    | 6.12    |
| PF3D7_1466200   | conserved Plasmodium protein, unknown function                       | 0.50  | 15.86   | 20.26   |
| PF3D7_1466300   | 26S proteasome regulatory subunit RPN2, putative (RPN2)              | -0.17 | 189.67  | 152.03  |
| PF3D7_1466400   | transcription factor with AP2 domain(s) (ApiAP2)                     | -1.18 | 172.13  | 68.50   |
| PF3D7_1466500   | conserved Plasmodium protein, unknown function                       | -0.76 | 1.54    | 0.79    |
| PF3D7_1466600   | conserved Plasmodium protein, unknown function                       | -0.09 | 15.86   | 13.47   |
| PF3D7_1466700   | large ribosomal subunit assembling protein, putative                 | 0.32  | 40.73   | 45.80   |
| PF3D7_1466800   | conserved Plasmodium protein, unknown function                       | 0.60  | 44.14   | 60.27   |
| PF3D7_1466900   | rhoptry protein, putative                                            | -1.31 | 61.59   | 22.39   |
| PF3D7_1467000   | conserved Plasmodium membrane protein, unknown function              | -0.66 | 4.97    | 2.84    |
| PF3D7_1467100   | DNA-3-methyladenine glycosylase, putative                            | -0.71 | 19.89   | 10.98   |
| PF3D7_1467200   | WD repeat-containing protein 79, putative (WDR79)                    | -0.87 | 27.96   | 13.78   |
| PF3D7_1467300   | 1-deoxy-D-xylulose 5-phosphate reductoisomerase (DXR)                | 0.13  | 15.82   | 15.59   |
| PF3D7_1467400   | 50S ribosomal protein L22, apicoplast, putative (L22)                | -0.50 | 25.64   | 16.32   |
| PF3D7_1467500   | DNA/RNA-binding protein KIN17, putative                              | 0.10  | 51.37   | 49.79   |
| PF3D7_1467600   | conserved Plasmodium protein, unknown function                       | 0.86  | 9.61    | 15.69   |
| PF3D7_1467700   | conserved Plasmodium protein, unknown function                       | 0.12  | 16.64   | 16.28   |
| PF3D7_1467800   | conserved Plasmodium protein, unknown function                       | 1.40  | 12.47   | 29.86   |
| PF3D7_1467900   | rab GTPase activator, putative                                       | 0.47  | 30.34   | 37.92   |
| PF3D7_1468000   | conserved Plasmodium protein, unknown function                       | 0.16  | 1.24    | 1.25    |
| PF3D7_1468100   | conserved Plasmodium protein, unknown function                       | -0.30 | 345.38  | 253.15  |
| PF3D7_1468200   | conserved protein, unknown function                                  | -0.44 | 65.52   | 43.56   |
| PF3D7_1468300   | leucine-rich repeat protein (LRR14.1)                                | -1.65 | 4.03    | 1.14    |
| PF3D7_1468400   | zinc finger protein, putative (D13)                                  | 0.47  | 23.14   | 28.88   |
| PF3D7_1468500   | derlin-1 (DER1-1)                                                    | 0.49  | 24.69   | 31.35   |
| PF3D7_1468600   | aminophospholipid transporter, putative                              | 0.51  | 0.33    | 0.42    |
| PF3D7_1468700   | eukaryotic initiation factor 4A (eIF4A)                              | -0.02 | 1898.52 | 1686.29 |
| PF3D7_1468800   | splicing factor U2AF large subunit, putative (U2AF2)                 | 0.53  | 74.70   | 97.26   |
| PF3D7_1468900   | conserved Plasmodium protein, unknown function                       | -1.70 | 48.13   | 13.40   |
| PF3D7_1469000   | translation initiation factor IF-1 (IF1)                             | -0.58 | 18.40   | 11.12   |
| PF3D7_1469100   | conserved Plasmodium protein, unknown function                       | -1.61 | 22.54   | 6.65    |
| PF3D7_1469200   | shewanella-like protein phosphatase 1, putative (SHLP1)              | 0.74  | 19.11   | 28.89   |
| PF3D7_1469300   | small subunit rRNA processing KH domain protein, putative            | -1.22 | 81.90   | 31.61   |
| PF3D7_1469400   | nucleoside transporter 3, putative (NT3)                             | -0.26 | 16.47   | 12.39   |
| PF3D7_1469500   | conserved Plasmodium protein, unknown function                       | -1.34 | 4.88    | 1.73    |
| PF3D7_1469600   | biotin carboxylase subunit of acetyl CoA carboxylase, putative (ACC) | 0.50  | 3.39    | 4.33    |
| PF3D7_1469700   | mediator of RNA polymerase II transcription subunit 6, putative      | 1.08  | 4.17    | 7.97    |
| PF3D7_1469800   | conserved Plasmodium protein, unknown function                       | -0.17 | 41.34   | 33.16   |
| PF3D7_1469900   | conserved Plasmodium protein, unknown function                       | -0.33 | 10.09   | 7.25    |
| PF3D7_1470000   | autophagy-related protein 12, putative (ATG12)                       | 0.04  | 8.99    | 8.36    |
| PF3D7_1470100   | conserved Plasmodium protein, unknown function                       | -0.07 | 8.24    | 7.07    |
| PF3D7_1470200   | conserved Plasmodium protein, unknown function                       | -0.08 | 35.04   | 29.86   |
| PF3D7_1470300   | conserved Plasmodium protein, unknown function                       | -1.02 | 56.32   | 25.09   |
| PF3D7_1470400   | mitochondrial pyruvate carrier protein 2, putative (MPC2)            | -0.04 | 23.95   | 21.02   |

|               |                                                                       |       |         |        |
|---------------|-----------------------------------------------------------------------|-------|---------|--------|
| PF3D7_1470500 | phosphodiesterase delta, putative (PDEdelta)                          | 0.55  | 4.64    | 6.13   |
| PF3D7_1470600 | RAP protein, putative                                                 | 0.01  | 32.12   | 29.10  |
| PF3D7_1470700 | conserved Plasmodium protein, unknown function                        | -0.48 | 18.88   | 12.18  |
| PF3D7_1470800 | conserved Plasmodium protein, unknown function                        | -0.06 | 9.91    | 8.57   |
| PF3D7_1470900 | proteasome subunit beta type-2, putative                              | 0.33  | 120.95  | 136.73 |
| PF3D7_1471000 | RNA 3'-terminal phosphate cyclase-like protein, putative              | -1.22 | 38.45   | 14.91  |
| PF3D7_1471100 | exported protein 2 (EXP2)                                             | -0.31 | 376.83  | 274.28 |
| PF3D7_1471200 | inorganic anion exchanger, inorganic anion antiporter (SuIP)          | 0.40  | 79.57   | 94.41  |
| PF3D7_1471300 | conserved Plasmodium protein, unknown function                        | 0.23  | 5.77    | 6.12   |
| PF3D7_1471400 | diacylglycerol kinase, putative                                       | 0.32  | 30.09   | 33.84  |
| PF3D7_1471500 | conserved Plasmodium membrane protein, unknown function               | 0.61  | 3.99    | 5.50   |
| PF3D7_1471600 | conserved Plasmodium protein, unknown function                        | 1.87  | 0.58    | 1.93   |
| PF3D7_1471700 | conserved Plasmodium protein, unknown function                        | 1.84  | 0.83    | 2.71   |
| PF3D7_1471800 | conserved Plasmodium protein, unknown function                        | 0.08  | 7.67    | 7.32   |
| PF3D7_1471900 | conserved Plasmodium protein, unknown function                        | -0.99 | 13.94   | 6.32   |
| PF3D7_1472000 | pre-mRNA-splicing factor ISY1, putative                               | 0.07  | 42.99   | 40.74  |
| PF3D7_1472100 | protein transport protein YIP1, putative (YIP1)                       | -1.16 | 115.17  | 46.33  |
| PF3D7_1472200 | histone deacetylase, putative (HDA1)                                  | -0.84 | 201.60  | 101.73 |
| PF3D7_1472300 | conserved Plasmodium membrane protein, unknown function               | -0.92 | 42.95   | 20.48  |
| PF3D7_1472400 | M1-family alanyl aminopeptidase, putative                             | -0.91 | 10.74   | 5.14   |
| PF3D7_1472500 | conserved Plasmodium protein, unknown function                        | 0.18  | 3.78    | 3.86   |
| PF3D7_1472600 | protein disulfide-isomerase (PDI-14)                                  | 0.19  | 17.67   | 18.17  |
| PF3D7_1472700 | DNA-directed RNA polymerase, alpha subunit, putative                  | 0.10  | 10.21   | 9.88   |
| PF3D7_1472800 | conserved Plasmodium protein, unknown function                        | 1.04  | 18.93   | 35.20  |
| PF3D7_1472900 | dihydroorotase, putative                                              | 0.27  | 21.88   | 23.78  |
| PF3D7_1473000 | conserved Plasmodium protein, unknown function                        | -0.66 | 0.47    | 0.24   |
| PF3D7_1473100 | GTPase-activating protein, putative                                   | -0.42 | 24.25   | 16.38  |
| PF3D7_1473200 | DnaJ protein, putative                                                | 0.67  | 140.72  | 202.28 |
| PF3D7_1473300 | conserved Plasmodium protein, unknown function                        | -0.06 | 1.47    | 1.26   |
| PF3D7_1473400 | conserved Plasmodium protein, unknown function                        | 1.23  | 8.74    | 18.50  |
| PF3D7_1473500 | conserved Plasmodium protein, unknown function                        | -1.23 | 48.69   | 18.68  |
| PF3D7_1473600 | conserved Plasmodium protein, unknown function                        | 1.96  | 2.99    | 10.61  |
| PF3D7_1473700 | nucleoporin NUP116/NSP16, putative (NUP116)                           | 0.90  | 27.97   | 47.09  |
| PF3D7_1473900 | conserved Plasmodium protein, unknown function                        | -1.22 | 92.42   | 35.83  |
| PF3D7_1474000 | probable protein, unknown function                                    | 2.66  | 5.91    | 33.68  |
| PF3D7_1474100 | mitochondrial ribosomal protein L20 precursor, putative               | 1.28  | 11.26   | 24.67  |
| PF3D7_1474200 | conserved Plasmodium membrane protein, unknown function               | 0.75  | 0.35    | 0.53   |
| PF3D7_1474300 | DNA repair metallo-beta-lactamase protein, putative                   | -0.10 | 2.19    | 1.85   |
| PF3D7_1474400 | conserved Plasmodium protein, unknown function                        | 0.87  | 1.41    | 2.32   |
| PF3D7_1474500 | splicing factor 3A subunit 1, putative (SF3A1)                        | -0.70 | 93.32   | 51.72  |
| PF3D7_1474600 | conserved Plasmodium membrane protein, unknown function               | -0.41 | 83.80   | 56.75  |
| PF3D7_1474700 | protein kinase, putative                                              | -1.08 | 7.13    | 3.03   |
| PF3D7_1474800 | proteasome subunit alpha type-1, putative                             | -0.38 | 189.01  | 131.02 |
| PF3D7_1474900 | trailer hitch homolog, putative (CITH)                                | 0.50  | 12.91   | 16.50  |
| PF3D7_1475000 | mediator complex subunit 31, putative                                 | -4.13 | 3.31    | 0.12   |
| PF3D7_1475100 | conserved Plasmodium protein, unknown function                        | -2.00 | 13.79   | 3.10   |
| PF3D7_1475200 | conserved protein, unknown function                                   | -0.19 | 4.06    | 3.21   |
| PF3D7_1475300 | cytochrome c oxidase assembly protein COX11, putative (COX11)         | 1.09  | 7.66    | 14.72  |
| PF3D7_1475400 | cysteine repeat modular protein 4 (CRMP4)                             | 1.90  | 0.20    | 0.69   |
| PF3D7_1475500 | LCCL domain-containing protein (CCp1)                                 | 1.17  | 1.94    | 3.95   |
| PF3D7_1475600 | bromodomain protein, putative                                         | -0.72 | 97.60   | 53.27  |
| PF3D7_1475700 | tubulin epsilon chain, putative                                       | 0.36  | 2.97    | 3.44   |
| PF3D7_1475800 | conserved Plasmodium protein, unknown function                        | 0.97  | 16.23   | 28.68  |
| PF3D7_1475900 | conserved Plasmodium protein, unknown function                        | 2.19  | 0.42    | 1.74   |
| PF3D7_1476000 | conserved Plasmodium protein, unknown function                        | -1.11 | 128.43  | 53.74  |
| PF3D7_1476100 | early transcribed membrane protein 14.2 (ETRAMP14.2)                  | -0.27 | 4.87    | 3.62   |
| PF3D7_1476200 | Plasmodium exported protein (PHISTb), unknown function                | -1.02 | 61.81   | 27.47  |
| PF3D7_1476300 | Plasmodium exported protein (PHISTb), unknown function                | 0.54  | 44.93   | 58.95  |
| PF3D7_1476400 | serine/threonine protein kinase, FIKK family, pseudogene (FIKK14)     | -0.38 | 54.66   | 37.93  |
| PF3D7_1476500 | probable protein, unknown function                                    | 1.82  | 13.58   | 43.45  |
| PF3D7_1476600 | Plasmodium exported protein, unknown function                         | 0.89  | 34.32   | 57.36  |
| PF3D7_1476700 | lysophospholipase, putative                                           | -0.33 | 2.00    | 1.43   |
| PF3D7_1476800 | lysophospholipase, putative                                           | -0.03 | 22.00   | 19.40  |
| PF3D7_1476900 | Plasmodium exported protein, unknown function, pseudogene             | 0.70  | 0.48    | 0.72   |
| PF3D7_1477000 | Plasmodium exported protein (hyp17), unknown function, pseudogene     | -0.70 | 68.60   | 38.05  |
| PF3D7_1477100 | Plasmodium exported protein (hyp6), unknown function                  | -0.47 | 0.69    | 0.43   |
| PF3D7_1477200 | Plasmodium exported protein (hyp15), unknown function                 | 0.60  | 0.54    | 0.76   |
| PF3D7_1477300 | Plasmodium exported protein (PHIST), unknown function (Pfig14-744)    | 0.83  | 0.40    | 0.66   |
| PF3D7_1477400 | Plasmodium exported protein (PHIST), unknown function                 | 0.19  | 0.44    | 0.45   |
| PF3D7_1477500 | Plasmodium exported protein (PHISTb), unknown function                | -0.64 | 272.97  | 158.35 |
| PF3D7_1477600 | surface-associated interspersed protein 14.1 (SURFIN 14.1) (SURF14.1) | 0.78  | 1.35    | 2.10   |
| PF3D7_1477700 | Plasmodium exported protein (PHISTa), unknown function (Pfig14-748)   | 0.70  | 0.95    | 1.39   |
| PF3D7_1477800 | acyl-CoA binding protein (ACBP)                                       | -0.05 | 18.54   | 16.20  |
| PF3D7_1477900 | acyl-CoA synthetase, pseudogene (ACSIb)                               | -0.11 | 1.42    | 1.19   |
| PF3D7_1478000 | Plasmodium exported protein (PHISTa), unknown function (GEXP17)       | -1.90 | 1079.43 | 261.55 |
| PF3D7_1478100 | Plasmodium exported protein (hyp13), unknown function                 | -1.72 | 54.95   | 15.04  |
| PF3D7_1478200 | Plasmodium exported protein, unknown function, pseudogene             | 3.00  | 0.00    | 0.20   |
| PF3D7_1478300 | Plasmodium exported protein, unknown function, pseudogene             | 1.77  | 0.08    | 0.32   |
| PF3D7_1478400 | Plasmodium exported protein, unknown function, pseudogene             | 2.51  | 0.00    | 0.07   |
| PF3D7_1478500 | Plasmodium exported protein (PHISTa), unknown function, pseudogene    | -0.36 | 0.51    | 0.35   |
| PF3D7_1478600 | EMP1-trafficking protein (PTP3)                                       | 0.18  | 73.25   | 74.96  |
| PF3D7_1478700 | Plasmodium exported protein, unknown function, pseudogene             | 3.89  | 0.00    | 0.25   |
| PF3D7_1478800 | Plasmodium exported protein, unknown function                         | 0.96  | 18.05   | 31.75  |
| PF3D7_1478900 | unspecified product                                                   | 2.67  | 87.80   | 503.34 |
| PF3D7_1479000 | acyl-CoA synthetase (ACSIa)                                           | 2.14  | 10.93   | 43.65  |
| PF3D7_1479100 | Plasmodium exported protein, unknown function                         | -0.67 | 2.65    | 1.49   |
| PF3D7_1479200 | Plasmodium exported protein (PHISTa), unknown function                | -0.32 | 131.28  | 94.95  |
| PF3D7_1479300 | Plasmodium exported protein (PHISTa), unknown function, pseudogene    | -1.03 | 0.16    | 0.06   |
| PF3D7_1479400 | rifin (RIF)                                                           | 1.13  | 0.25    | 0.51   |
| PF3D7_1479500 | stevor                                                                | 0.87  | 0.10    | 0.18   |
| PF3D7_1479600 | rifin (RIF)                                                           | -1.40 | 0.04    | 0.00   |
| PF3D7_1479700 | rifin (RIF)                                                           | 3.69  | 0.04    | 0.73   |
| PF3D7_1479800 | rifin (RIF)                                                           | 0.51  | 0.06    | 0.09   |
| PF3D7_1479900 | stevor                                                                | -0.40 | 0.05    | 0.03   |
| PF3D7_1480000 | rifin (RIF)                                                           | -3.27 | 0.22    | 0.00   |
| PF3D7_1480100 | erythrocyte membrane protein 1 (PfEMP1), truncated, pseudogene        | -3.47 | 1.51    | 0.08   |
| PFC10_API0012 | unspecified product (sufB)                                            | 0.19  | 0.00    | 0.00   |
| PFC10_API0013 | unspecified product (ORF51)                                           | 0.19  | 0.00    | 0.00   |

|               |                                |       |      |       |
|---------------|--------------------------------|-------|------|-------|
| PFC10_API0014 | unspecified product (ORF101)   | 0.19  | 0.00 | 0.00  |
| PFC10_API0015 | unspecified product (rpoB)     | 0.19  | 0.00 | 0.00  |
| PFC10_API0016 | unspecified product (rpoC)     | 0.19  | 0.00 | 0.00  |
| PFC10_API0017 | unspecified product (rpoD)     | 0.19  | 0.00 | 0.00  |
| PFC10_API0018 | unspecified product (rps2)     | 0.19  | 0.00 | 0.00  |
| PFC10_API0019 | unspecified product (ORF105)   | 0.19  | 0.00 | 0.00  |
| PFC10_API0020 | unspecified product (ORF79)    | 0.19  | 0.00 | 0.00  |
| PFC10_API0022 | unspecified product (ORF129)   | 0.19  | 0.00 | 0.00  |
| PFC10_API0027 | unspecified product (ORF78)    | -0.23 | 0.28 | 0.19  |
| PFC10_API0028 | unspecified product (tufA)     | 2.49  | 2.91 | 14.76 |
| PFC10_API0029 | unspecified product (rps7)     | -0.40 | 0.89 | 0.59  |
| PFC10_API0030 | unspecified product (rps12)    | 2.42  | 2.37 | 11.67 |
| PFC10_API0031 | unspecified product (rpl36)    | 0.19  | 0.00 | 0.00  |
| PFC10_API0032 | unspecified product (ORF91)    | 0.19  | 0.00 | 0.00  |
| PFC10_API0033 | unspecified product (rps5)     | -1.40 | 0.06 | 0.00  |
| PFC10_API0034 | unspecified product (rpl6)     | 0.19  | 0.00 | 0.00  |
| PFC10_API0035 | unspecified product (rps8)     | 0.19  | 0.00 | 0.00  |
| PFC10_API0036 | unspecified product (rpl14)    | 0.19  | 0.00 | 0.00  |
| PFC10_API0037 | unspecified product (rps17)    | 0.77  | 0.10 | 0.20  |
| PFC10_API0038 | unspecified product (rpl16)    | 0.77  | 0.52 | 0.83  |
| PFC10_API0039 | unspecified product (rps3)     | -0.81 | 0.03 | 0.00  |
| PFC10_API0040 | unspecified product (rps19)    | 0.19  | 0.16 | 0.17  |
| PFC10_API0041 | unspecified product (rpl2)     | 1.65  | 0.21 | 0.66  |
| PFC10_API0042 | unspecified product (rpl23)    | 0.19  | 0.00 | 0.00  |
| PFC10_API0043 | unspecified product (rpl4)     | 1.77  | 0.00 | 0.08  |
| PFC10_API0055 | unspecified product (rps4)     | 0.19  | 0.00 | 0.00  |
| PFC10_API0059 | unspecified product (rps11)    | 0.67  | 0.22 | 0.35  |
| PFC10_API0060 | unspecified product (Clp (C?)) | 3.42  | 0.07 | 0.74  |



**Table 3, Primers**

**Primers for screening knock-out, tagging or episomal expression**

|     |                                   |
|-----|-----------------------------------|
| P1  | GATGTCAATATGTAAATGTATATTAAGG      |
| P2  | CTAATTCTTTCATTACTTCAATAATTCC      |
| P3  | CGGAGAGTTTGTTTTATGAATATAATTATATAC |
| P4  | GCTTCTAACATTCTTGTCTTAATAATATTTTC  |
| P5  | GAACAGAATGTGGATATTAATTTG          |
| P6  | TCTTAAGGATATTATTTGGTCTTG          |
| P7  | CGGAGAGTTTGTTTTATGAATATAAT        |
| P8  | CATCGATCGCAATAAGTAAAATG           |
| P9  | TTATTATCAAGAATCAGGAAGATG          |
| P10 | ACAATTTCTCTACATCTTCTTTTG          |

**Primers for the Probes used in DNA-FISH**

|                   |                            |
|-------------------|----------------------------|
| rep20 Fw          | CCTAACATTAGTAATGTAGGTCTG   |
| rep20 Rev         | TCTATATTTGTAAATTAAGACCA    |
| PF3d7_1240600 Fw  | CACCTAAAAACCTTCGCGATATC    |
| PF3D7_1240600 Rev | GTGGCTTCGGTGTATTTGTATTTG   |
| PF3D7_0400400 Fw  | TTCACAGAATGGAGTGATG        |
| PF3D7_0400400 Rev | AACACTACTTGTGGTAGTAC       |
| PF3D7_0412400 Fw  | CTATTGGGTTGCACATATG        |
| PF3D7_0412400 Rev | CATAGTAACTTCTTGAGGAG       |
| PF3D7_0115700 Fw  | GATAAAGATGCCAAAGATTGCCAATC |
| PF3D7_0115700 Rev | GACACAAAAAATCCCGAACAGTAC   |

**Primers for H3K9me3 ChIP-qPCR**

|                       |                               |
|-----------------------|-------------------------------|
| PF3D7_0400400-TSS Fw  | TTATTCTATTTGTATACGTGATGAC     |
| PF3D7_0400400-TSS Rev | TACTTAATTTTTGTGACATTGGAG      |
| PF3D7_0300100-TSS Fw  | GAATACGTATTCTTTTTGTATATATTTTC |
| PF3D7_0300100-TSS Rev | ATACATATATATAAAGCATACGTATTC   |
| PF3D7_0617400-TSS Fw  | CTACTTTTTACATTTTTGTATTTCTG    |
| PF3D7_0617400-TSS Rev | GTTCTATTAAACTGTATATAATCGAA    |
| PF3D7_1240600-TSS Fw  | AGTGAATAATATTAGTATGAAATATTG   |
| PF3D7_1240600-TSS Rev | ATGTGGGAATATGAATATTTTACAA     |
